# Supplementary material for: Natural variation in the Caenorhabditis elegans egg-laying circuit modulates an intergenerational fitness trade-off
Source: eLife. 2024 Apr 2;12:RP88253. doi: 10.7554/eLife.88253 (PMC10987095; doi:10.7554/eLife.88253)
Supplement: Figure 1—figure supplement 1—source data 1. [file elife-88253-fig1-figsupp1-data1.xlsx]

## Sheet: Figure 1 - figure supplement 1
Class	Strain	Isotype	Mean egg retention	Latitude	Longitude	Distance to equator	Elevation	Substrate	Locality	Country	Continent
Class III	JU751	JU751	48.54	48.84	2.5	48.84	47	Compost	Ile-de-France	France	Europe
Class III	JU2829	JU2829	36.45	46.632	1.064	46.632	80	Rotting_nut/pod/seed/fruit	Centre-Val de Loire	France	Europe
Class III	CX11276	CX11276	35.875	34.2011	-118.212	34.2011	391	Soil	California	USA	North America
Class III	JU830	JU830	34.45	48.52	9.05	48.52	339	Compost	Baden-Wurttemberg	Germany	Europe
Class III	NIC1832	NIC1832	34.1406	47.3675	-2.52884	47.3675	8	Compost	Lerat, France	France	Europe
Class III	JU440	JU440	32.125	48.715	1.56	48.715	133	Compost	Centre	France	Europe
Class III	ED3005	ED3005	30.25	55.94	-3.36	55.94	41	Compost	Scotland	Scotland	Europe
Class III	JU2593	JU2593	29.4583	48.8226	2.22233	48.8226	80	Compost	Ile-de-France	France	Europe
Class III	NIC1786	NIC1786	28.775	28.4111	-16.5355	28.4111	114	Vegetal_litter/mix	Botanical garden, Puerto de la Cruz	Spain	Europe
Class III	NIC275	NIC275	26.125	39.7695	-8.75636	39.7695	129	Rotting_nut/pod/seed/fruit	Leiria District	Portugal	Europe
Class III	JU397	JU397	25.275	49.28	-0.32	49.28	16	Compost	Basse-Normandie	France	Europe
Class III	JU2587	JU2587	25.175	45.0267	3.87202	45.0267	661	Compost	Auvergne-Rhone-Alpes	France	Europe
Class III	JU346	JU346	25.05	44.42	4.4	44.42	147	Arthropod	Languedoc-Roussillon	France	Europe
Class III	QX1793	QX1793	25.05	20.7056	-156.357	20.7056	865	Compost	Hawaii	Hawaii	North America
Class II	JU2316	JU2316	24.05	38.7175	-9.1486	38.7175	66	Rotting_nut/pod/seed/fruit	Lisbon	Portugal	Europe
Class II	NIC256	NIC256	23.575	38.7183	-9.14875	38.7183	57	Rotting_nut/pod/seed/fruit	Lisbon Metropolitan Area	Portugal	Europe
Class II	NIC1782	NIC1782	23.5	28.4111	-16.5355	28.4111	114	Rotting_nut/pod/seed/fruit	Botanical garden, Puerto de la Cruz	Spain	Europe
Class II	NIC265	NIC265	23.475	38.7183	-9.14875	38.7183	57	Rotting_flower	Lisbon Metropolitan Area	Portugal	Europe
Class II	NIC251	NIC251	23.4	38.6662	-28.1514	38.6662	223	Rotting_nut/pod/seed/fruit	Azores	Portugal	Europe
Class II	JU1249	JU1249	22.95	49.126	1.951	49.126	65	Rotting_nut/pod/seed/fruit	Ile-de-France	France	Europe
Class II	XZ1672	XZ1672	22.9333	47.6877	-122.301	47.6877	73	Rotting_nut/pod/seed/fruit	Washington	USA	North America
Class II	NIC1792	NIC1792	22.8608	28.4111	-16.5355	28.4111	114	Rotting_flower	Botanical garden, Puerto de la Cruz	Spain	Europe
Class II	JU311	JU311	22.85	44.42	4.4	44.42	147	Mollusk	Rhone-Alpes	France	Europe
Class II	QW947	QW947	22.75	-33.4213	-70.6106	33.4213	612	Compost	Santiago Metropolitan Region	Chili	South America
Class II	MY23	MY23	22.6	23.5415	120.908	23.5415	74	Compost	Nordrhein-Westfalen	Germany	Europe
Class II	NIC1788	NIC1788	22.6	28.4111	-16.5355	28.4111	114	Vegetal_litter/mix	Botanical garden, Puerto de la Cruz	Spain	Europe
Class II	DL200	DL200	22.4	9.03	38.74	9.03	2439	Soil	Oromia	Ethiopia	Africa
Class II	ECA745	ECA745	22.2	19.7005	-155.956	19.7005	752	Vegetal_litter/mix	Hawaii island, Hawaii	Hawaii	North America
Class II	NIC236	NIC236	22.025	39.242	-9.31342	39.242	14	Rotting_nut/pod/seed/fruit	Lisboa	Portugal	Europe
Class II	ECA743	ECA743	21.7	20.7419	-156.323	20.7419	1033	Rotting_flower	Hawaii island, Hawaii	Hawaii	North America
Class II	MY10	MY10	21.625	51.96	7.53	51.96	74	Compost	Nordrhein-Westfalen	Germany	Europe
Class II	JU792	JU751	21.325	48.7015	2.1725	48.7015	487	Compost	Midi-Pyrenees	France	Europe
Class II	JU2565	JU2565	21.2	44.9584	1.06621	44.9584	215	Rotting_nut/pod/seed/fruit	Nouvelle-Aquitaine	France	Europe
Class II	ED3011	ED3011	21.1	55.92	-3.19	55.92	85	Compost	Scotland	Scotland	Europe
Class II	JU1200	JU1200	20.8769	55.577	-4.6	55.577	32	Compost	Scotland	Scotland	Europe
Class II	JU1242	JU1242	20.875	49.1269	1.9595	49.1269	92	Mollusk	Ile-de-France	France	Europe
Class II	CX11254	CX11254	20.825	34.1301	-118.115	34.1301	213	Soil	California	USA	North America
Class II	NIC1799	NIC1799	20.7436	28.4111	-16.5355	28.4111	114	Rotting_stem	Botanical garden, Puerto de la Cruz	Spain	Europe
Class II	JU394	JU394	20.725	49.28	-0.32	49.28	16	Compost	Basse-Normandie	France	Europe
Class II	JT11398	JT11398	20.0625	47.7639	-122.275	47.7639	124	Compost	Washington	USA	North America
Class II	DL226	DL226	20.05	44.5633	-123.282	44.5633	73	Soil	Oregon	USA	North America
Class II	JU258	JU258	19.9667	32.73	-16.89	32.73	1041	Soil	Madeira	Portugal	Europe
Class II	MY18	MY18	19.95	51.96	7.53	51.96	74	Compost	North Rhine-Westphalia	Germany	Europe
Class II	JU782	JU751	19.4833	38.7191	-9.1503	38.7191	77	Compost	Lisbon	Portugal	Europe
Class II	JU1792	JU1792	19.35	46.6328	1.06429	46.6328	80	Rotting_stem	Centre-Val de Loire	France	Europe
Class II	JU2131	JU2131	19.3	48.0497	-4.705	48.0497	17	Rotting_stem	Brittany	France	Europe
Class II	JU323	JU323	19.2	48.7015	2.1725	48.7015	147	None	Rhone-Alpes	France	Europe
Class II	ECA372	ECA372	19.1857	22.1217	-159.664	22.1217	1111	Vegetal_litter/mix	Hawaii	Hawaii	North America
Class II	JU393	JU393	18.85	49.28	-0.32	49.28	16	Compost	Basse-Normandie	France	Europe
Class II	NIC274	NIC274	18.8	39.7695	-8.75636	39.7695	129	Rotting_nut/pod/seed/fruit	Leiria District	Portugal	Europe
Class II	NIC242	NIC242	18.775	38.6918	-9.31609	38.6918	7	Rotting_nut/pod/seed/fruit	Lisbon Metropolitan Area	Portugal	Europe
Class II	JU778	JU751	18.675	38.719	-9.1491	38.719	62	Rotting_nut/pod/seed/fruit	Lisbon	Portugal	Europe
Class II	ED3049	ED3049	18.5	-33.3667	19.3167	33.3667	455	Compost	Western Cape	South Africa	Africa
Class II	MY795	MY795	18.375	54.3464	10.1177	54.3464	26	Compost	Schleswig-Holstein	Germany	Europe
Class II	NIC1789	NIC1789	18.3143	28.4111	-16.5355	28.4111	114	Rotting_flower	Botanical garden, Puerto de la Cruz	Spain	Europe
Class II	JU3140	JU3140	18.1	48.71	-3.81	48.71	28	Rotting_stem	Brittany	France	Europe
Class II	NIC513	NIC513	18	38.776	-9.16714	38.776	79	Rotting_nut/pod/seed/fruit	Lisbon	Portugal	Europe
Class II	ECA724	ECA724	17.9667	19.4388	-155.304	19.4388	1206	Vegetal_litter/mix	Hawaii island, Hawaii	Hawaii	North America
Class II	ECA369	ECA369	17.9429	21.1756	-157.006	21.1756	475	Vegetal_litter/mix	Hawaii	Hawaii	North America
Class II	JU1213	JU1213	17.9	48.71	-3.81	48.71	28	Rotting_nut/pod/seed/fruit	Bretagne	France	Europe
Class II	WN2033	WN2033	17.8571	51.975	5.694	51.975	27	Rotting_stem	Gelderland	Netherlands	Europe
Class II	JU2581	JU2581	17.825	46.6	1.1	46.6	109	Rotting_nut/pod/seed/fruit	Centre-Val de Loire	France	Europe
Class II	NIC260	NIC260	17.7	38.7183	-9.14875	38.7183	57	Rotting_nut/pod/seed/fruit	Lisbon Metropolitan Area	Portugal	Europe
Class II	CX11307	CX11307	17.625	34.1295	-118.11	34.1295	204	Soil	California	USA	North America
Class II	ED3040	ED3040	17.5	-26.1667	28.0167	26.1667	1622	Compost	Gauteng	South Africa	Africa
Class II	NIC166	NIC166	17.4	46.7272	6.89775	46.7272	687	Rotting_nut/pod/seed/fruit	Vaud	Switzerland	Europe
Class II	NIC231	NIC231	17.4	43.7205	7.24045	43.7205	198	Rotting_nut/pod/seed/fruit	Provence-Alpes-Cote d Azur	France	Europe
Class II	NIC252	NIC252	17.375	38.6613	-28.1479	38.6613	224	Rotting_nut/pod/seed/fruit	Azores	Portugal	Europe
Class II	ECA710	ECA710	17.3667	20.0397	-155.438	20.0397	625	Vegetal_litter/mix	Hawaii island, Hawaii	Hawaii	North America
Class II	JU2141	JU2141	17.3	46.6293	1.0512	46.6293	111	Rotting_nut/pod/seed/fruit	Centre-Val de Loire	France	Europe
Class II	JU2257	JU2257	17.3	46.6	1.1	46.6	109	Compost	Centre-Val de Loire	France	Europe
Class II	NIC1790	NIC1790	17.2564	28.4111	-16.5355	28.4111	114	Rotting_flower	Botanical garden, Puerto de la Cruz	Spain	Europe
Class II	JU2519	JU2519	17.175	38.7175	-9.1486	38.7175	66	Rotting_nut/pod/seed/fruit	Lisbon	Portugal	Europe
Class II	ED3046	ED3046	17.15	-33.3667	19.3167	33.3667	455	Compost	Western Cape	South Africa	Africa
Class II	ECA746	ECA746	17.1	19.1153	-155.819	19.1153	632	Vegetal_litter/mix	Hawaii island, Hawaii	Hawaii	North America
Class II	NIC271	NIC271	17.1	38.6924	-9.31592	38.6924	5	Rotting_nut/pod/seed/fruit	Lisbon Metropolitan Area	Portugal	Europe
Class II	CB4932	CB4932	17.025	51.02	-3.1	51.02	15	Fungus	England	England	Europe
Class II	QG556	QG556	16.975	34.4216	-119.702	34.4216	19	Rotting_nut/pod/seed/fruit	California	USA	North America
Class II	NIC1785	NIC1785	16.9524	28.4111	-16.5355	28.4111	114	Rotting_flower	Botanical garden, Puerto de la Cruz	Spain	Europe
Class II	NIC501	NIC501	16.9474	48.773	2.2675	48.773	106	Rotting_nut/pod/seed/fruit	Ile-de-France	France	Europe
Class II	JU1491	JU1491	16.925	46.63	1.06	46.63	97	Rotting_stem	Centre	France	Europe
Class II	NIC1794	NIC1794	16.8919	28.4111	-16.5355	28.4111	114	Rotting_nut/pod/seed/fruit	Botanical garden, Puerto de la Cruz	Spain	Europe
Class II	JU3226	JU3226	16.8	-41.2908	174.769	41.2908	100	Rotting_nut/pod/seed/fruit	Wellington	New Zealand	Oceania
Class II	MY1	MY1	16.8	52.54	7.31	52.54	36	Compost	Niedersachsen	Germany	Europe
Class II	CB4857	NA	16.775	34.1371	-118.125	34.1371	NA	NA	#N/A	#N/A
Class II	QG2835	QG2835	16.6667	-27.3308	152.759	27.3308	676	Rotting_nut/pod/seed/fruit	Queensland	Australia	Oceania
Class II	XZ1756	XZ1756	16.6667	47.6232	-122.307	47.6232	114	Rotting_nut/pod/seed/fruit	Washington	USA	North America
Class II	PB303	PB303	16.65	None	None	NA	None	Arthropod	None	NA	NA
Class II	JU406	JU406	16.575	49.28	-0.32	49.28	16	Compost	Basse-Normandie	France	Europe
Class II	QG2827	QG2827	16.5667	-31.9547	115.845	31.9547	56	Vegetal_litter/mix	Western Australia	Australia	Oceania
Class II	WN2002	WN2002	16.55	51.9753	5.69483	51.9753	28	Compost	Gelderland	Netherlands	Europe
Class II	JU1543	JU1543	16.45	48.7015	2.1725	48.7015	65	Rotting_nut/pod/seed/fruit	Ile-de-France	France	Europe
Class II	JU1246	JU1246	16.425	49.1262	1.96152	49.1262	89	Rotting_nut/pod/seed/fruit	Ile-de-France	France	Europe
Class II	JU2800	JU2800	16.35	48.79	2.331	48.79	45	Rotting_nut/pod/seed/fruit	Ile-de-France	France	Europe
Class II	QG536	QG536	16.3	37.7679	-122.442	37.7679	173	Rotting_nut/pod/seed/fruit	California	USA	North America
Class II	NIC1791	NIC1791	16.2785	28.4111	-16.5355	28.4111	114	Rotting_flower	Botanical garden, Puerto de la Cruz	Spain	Europe
Class II	NIC1812	NIC1812	16.275	28.4822	-16.4122	28.4822	477	Vegetal_litter/mix	Park, Tacoronte	Spain	Europe
Class II	JU2001	JU2001	16.175	-21.1	55.5	21.1	2173	Rotting_flower	Saint-Benoît	Madagascar	Africa
Class II	JU2853	JU2853	16.15	41.19	-7.545	41.19	82	Soil	Vila Real District	Portugal	Europe
Class II	NIC268	NIC268	16.15	38.6924	-9.31592	38.6924	5	Rotting_nut/pod/seed/fruit	None	NA	NA
Class II	ECA738	ECA738	16	21.1393	-156.974	21.1393	660	Rotting_flower	Molokai, Hawaii	Hawaii	North America
Class II	NIC1796	NIC1796	15.9706	28.4111	-16.5355	28.4111	114	Rotting_stem	Botanical garden, Puerto de la Cruz	Spain	Europe
Class II	ECA594	ECA594	15.9667	34.4175	-119.641	34.4175	10	Rotting_nut/pod/seed/fruit	Santa Barbar, USA	USA	North America
Class II	JU1666	JU1666	15.7571	48.7049	-3.7941	48.7049	18	Rotting_nut/pod/seed/fruit	Brittany	France	Europe
Class II	CX11292	CX11292	15.7	34.1353	-118.306	34.1353	390	Soil	California	USA	North America
Class II	NIC267	NIC267	15.7	38.6924	-9.31592	38.6924	5	Rotting_nut/pod/seed/fruit	Lisbon Metropolitan Area	Portugal	Europe
Class II	ECA923	ECA923	15.6333	21.2901	-157.708	21.2901	1	Fungus	Oahu, Hawaii	Hawaii	North America
Class II	NIC1808	NIC1808	15.6154	28.4983	-16.3993	28.4983	491	Rotting_nut/pod/seed/fruit	Rural garden, Tacoronte	Spain	Europe
Class II	EG4725	EG4725	15.6	41.6288	-8.3476	41.6288	101	Rotting_nut/pod/seed/fruit	Braga	Portugal	Europe
Class II	NIC1	NIC1	15.575	43.279	5.3543	43.279	13	Rotting_nut/pod/seed/fruit	Provence-Alpes-Cote d Azur	France	Europe
Class II	NIC258	NIC258	15.55	38.7183	-9.14875	38.7183	57	Rotting_nut/pod/seed/fruit	Lisbon Metropolitan Area	Portugal	Europe
Class II	NIC523	NIC523	15.55	36.5357	-6.29831	36.5357	13	Rotting_nut/pod/seed/fruit	Andalusia	Spain	Europe
Class II	ED3077	ED3077	15.525	-1.31667	36.8	1.31667	1688	Vegetal_litter/mix	Nairobi County	Kenya	Africa
Class II	NIC266	NIC266	15.525	38.6924	-9.31592	38.6924	5	Rotting_flower	Lisbon Metropolitan Area	Portugal	Europe
Class II	N2	N2	15.475	51.45	-2.59	51.45	9	Compost	England	England	Europe
Class II	JU3167	JU3167	15.4667	0.289	6.612	0.289	1156	Rotting_nut/pod/seed/fruit	Sao Tome	Portugal	Europe
Class II	JU1808	JU1808	15.4	48.8126	2.39537	48.8126	34	Mollusk	Ile-de-France	France	Europe
Class II	NIC1783	NIC1783	15.3621	28.4111	-16.5355	28.4111	114	Rotting_nut/pod/seed/fruit	Botanical garden, Puerto de la Cruz	Spain	Europe
Class II	CX11271	CX11271	15.325	34.1371	-118.125	34.1371	232	Soil	California	USA	North America
Class II	JU2513	JU2513	15.275	38.2602	22.0736	38.2602	1	Rotting_nut/pod/seed/fruit	Peloponnisos Dytiki Ellada ke Ionio	Greece	Europe
Class II	JU2575	JU2575	15.15	49.0857	3.0707	49.0857	58	Rotting_stem	Ile-de-France	France	Europe
Class II	MY2741	MY2741	15.0286	54.3464	10.1177	54.3464	25	Mollusk	Schleswig-Holstein	Germany	Europe
Class II	NIC1801	NIC1801	14.9459	28.4111	-16.5355	28.4111	114	Rotting_nut/pod/seed/fruit	Botanical garden, Puerto de la Cruz	Spain	Europe
Class II	QX1212	QX1212	14.925	37.7502	-122.433	37.7502	65	Rotting_nut/pod/seed/fruit	California	USA	North America
Class II	CB4851	NA	14.85	44.85	0.48	44.85	NA	NA	#N/A	#N/A
Class II	JU2811	JU2811	14.85	-33.8632	151.219	33.8632	5	Rotting_nut/pod/seed/fruit	New South Wales	Australia	Oceania
Class II	NIC195	NIC195	14.75	38.5459	-28.3732	38.5459	119	Rotting_nut/pod/seed/fruit	Azores	Portugal	Europe
Class II	JU1395	JU1395	14.725	47.2199	0.04619	47.2199	33	Compost	Pays de la Loire	France	Europe
Class II	PX179	PX179	14.725	44.035	-123.058	44.035	220	Arthropod	Oregon	USA	North America
Class II	QG2818	QG2818	14.7	-28.0474	152.394	28.0474	835	Rotting_nut/pod/seed/fruit	Queensland	Australia	Oceania
Class II	ED3048	ED3048	14.575	-33.3667	19.3167	33.3667	455	Compost	Western Cape	South Africa	Africa
Class II	NIC276	NIC276	14.575	39.7695	-8.75636	39.7695	129	Rotting_nut/pod/seed/fruit	Leiria District	Portugal	Europe
Class II	MY2453	MY2453	14.55	48.7015	2.1725	48.7015	71	Compost	North Rhine-Westphalia	Germany	Europe
Class II	QX1233	QX1233	14.55	37.8804	-122.284	37.8804	34	Compost	California	USA	North America
Class II	ECA592	ECA592	14.5333	34.4171	-119.641	34.4171	11	Rotting_nut/pod/seed/fruit	Santa Barbar, USA	USA	North America
Class II	JU3137	JU3137	14.4857	48.7015	2.1725	48.7015	65	Rotting_nut/pod/seed/fruit	Ile-de-France	France	Europe
Class II	JU1409	JU1409	14.425	37.4721	-5.6331	37.4721	203	Rotting_nut/pod/seed/fruit	Andalucía	Spain	Europe
Class II	MY679	MY679	14.4	54.3491	10.1151	54.3491	26	Compost	Schleswig-Holstein	Germany	Europe
Class II	NIC522	NIC522	14.4	36.5357	-6.30444	36.5357	14	Rotting_nut/pod/seed/fruit	Andalusia	Spain	Europe
Class II	MY2573	MY2573	14.35	43.8658	5.0628	43.8658	65	Compost	North Rhine-Westphalia	Germany	Europe
Class II	ECA928	ECA928	14.3	21.2901	-157.708	21.2901	1	Fungus	Oahu, Hawaii	Hawaii	North America
Class II	JU1581	JU1581	14.175	48.7015	2.1725	48.7015	65	Rotting_nut/pod/seed/fruit	Ile-de-France	France	Europe
Class II	NIC262	NIC262	14.15	38.7183	-9.14875	38.7183	57	Rotting_flower	Lisbon Metropolitan Area	Portugal	Europe
Class II	NIC269	NIC269	14.15	38.6924	-9.31592	38.6924	5	Rotting_nut/pod/seed/fruit	Lisbon Metropolitan Area	Portugal	Europe
Class II	ECA593	ECA593	14.1	34.4186	-119.642	34.4186	10	Rotting_flower	Santa Barbar, USA	USA	North America
Class II	WN2063	WN2063	14.1	51.975	5.65132	51.975	9	Rotting_nut/pod/seed/fruit	Gelderland	Netherlands	Europe
Class II	JU3169	JU3169	14.0667	0.289	6.612	0.289	1156	Rotting_stem	Sao Tome	Portugal	Europe
Class II	BRC20263	BRC20263	14	-33.8675	151.207	33.8675	19	None	New South Wales	Australia	Oceania
Class II	QG2874	QG2874	13.9833	-27.3686	152.184	27.3686	613	Rotting_nut/pod/seed/fruit	Queensland	Australia	Oceania
Class II	XZ2019	XZ2019	13.9667	47.6365	-122.306	47.6365	27	Rotting_nut/pod/seed/fruit	Washington	USA	North America
Class II	JU2464	JU2464	13.95	-13.155	-72.525	13.155	2073	Rotting_nut/pod/seed/fruit	Cusco	Peru	South America
Class II	ED3073	ED3073	13.9	-1.05	36.39	1.05	2352	Compost	Kiambu County	Kenya	Africa
Class II	ECA347	ECA347	13.8667	19.4389	-155.304	19.4389	1203	Vegetal_litter/mix	Hawaii island, Hawaii	Hawaii	North America
Class II	ECA744	ECA744	13.8333	19.7188	-155.949	19.7188	976	Vegetal_litter/mix	Hawaii island, Hawaii	Hawaii	North America
Class II	CX11285	CX11285	13.775	34.1433	-118.055	34.1433	161	Soil	California	USA	North America
Class II	ED3052	ED3052	13.775	-33.3667	19.3167	33.3667	455	Compost	Western Cape	South Africa	Africa
Class II	QG2875	QG2875	13.6333	-27.3672	152.183	27.3672	620	Rotting_nut/pod/seed/fruit	Queensland	Australia	Oceania
Class II	DL238	DL238	13.625	19.11	-155.81	19.11	653	Vegetal_litter/mix	Hawaii	Hawaii	North America
Class II	NIC199	NIC199	13.55	37.7454	-25.1993	37.7454	26	Rotting_nut/pod/seed/fruit	Azores	Portugal	Europe
Class II	WN2050	WN2050	13.5	49.121	1.95103	49.121	20	Rotting_stem	Gelderland	Netherlands	Europe
Class II	JU360	JU360	13.45	48.98	2.23	48.98	95	Compost	Ile-de-France	France	Europe
Class II	CX11264	CX11264	13.35	34.1301	-118.115	34.1301	213	Soil	California	USA	North America
Class II	JU2906	JU2906	13.35	43.8023	11.2806	43.8023	89	Rotting_stem	Tuscany	Italia	Europe
Class II	QG2850	QG2850	13.3	-28.0845	152.507	28.0845	295	Vegetal_litter/mix	Queensland	Australia	Oceania
Class II	EG4349	EG4349	13.25	40.7717	-111.873	40.7717	1352	Rotting_nut/pod/seed/fruit	Utah	USA	North America
Class II	JU2522	JU2522	13.15	38.7175	-9.1486	38.7175	66	Rotting_nut/pod/seed/fruit	Lisbon	Portugal	Europe
Class II	QG2811	QG2811	13.1	-35.2542	149.115	35.2542	590	Rotting_nut/pod/seed/fruit	Australian Capital Territory	Australia	Oceania
Class II	QX1791	QX1791	13.075	20.6344	-156.393	20.6344	581	Rotting_wood	Hawaii	Hawaii	North America
Class II	XZ1735	XZ1735	13.0667	-22.9	-46.7	22.9	821	Rotting_nut/pod/seed/fruit	State of Sao Paulo	Brazil	South America
Class II	ECA189	ECA189	13.0429	19.4239	-155.222	19.4239	1117	Soil	Hawaii	Hawaii	North America
Class II	ECA706	ECA706	13	20.0388	-155.439	20.0388	638	Vegetal_litter/mix	Hawaii island, Hawaii	Hawaii	North America
Class II	JU1793	JU1793	13	48.7015	2.1725	48.7015	67	Rotting_stem	Ile-de-France	France	Europe
Class II	JU2466	JU2466	12.95	-13.257	-72.266	13.257	2867	Rotting_nut/pod/seed/fruit	Cusco	Peru	South America
Class II	JU847	JU751	12.9333	48.46	7.461	48.46	226	Compost	Alsace-Champagne-Ardenne-Lorraine	France	Europe
Class II	PB306	NA	12.925	None	None	NA	NA	NA	#N/A	#N/A
Class II	QG2838	QG2838	12.9	-27.3311	152.764	27.3311	625	Rotting_nut/pod/seed/fruit	Queensland	Australia	Oceania
Class II	WN2066	WN2066	12.8889	51.9753	5.6949	51.9753	28	Arthropod	Gelderland	Netherlands	Europe
Class II	NIC255	NIC255	12.875	43.7148	7.26678	43.7148	58	Rotting_nut/pod/seed/fruit	Provence-Alpes-Cote d Azur	France	Europe
Class II	NIC272	NIC272	12.875	39.7695	-8.75636	39.7695	129	Rotting_nut/pod/seed/fruit	Leiria District	Portugal	Europe
Class II	GXW1	GXW1	12.85	30.5429	114.42	30.5429	18	Rotting_nut/pod/seed/fruit	Hubei Sheng	China	Asia
Class II	JU2825	JU2825	12.85	48.8092	2.3862	48.8092	42	Rotting_stem	Ile-de-France	France	Europe
Class II	JU775	JU775	12.825	38.7175	-9.1486	38.7175	66	Rotting_nut/pod/seed/fruit	Lisbon	Portugal	Europe
Class II	NIC1787	NIC1787	12.7931	28.4111	-16.5355	28.4111	114	Rotting_nut/pod/seed/fruit	Botanical garden, Puerto de la Cruz	Spain	Europe
Class II	JU367	JU367	12.725	48.98	2.23	48.98	95	Compost	Ile-de-France	France	Europe
Class II	MY772	MY772	12.7	54.3464	10.1177	54.3464	26	Compost	Schleswig-Holstein	Germany	Europe
Class II	ED3012	ED3012	12.675	55.92	-3.19	55.92	85	Compost	Scotland	Scotland	Europe
Class II	ECA930	ECA930	12.6667	31.7784	35.1979	31.7784	777	Rotting_nut/pod/seed/fruit	Jerusalum, Israel	Israel	Asia
Class II	XZ1514	XZ1514	12.5857	22.149	-159.668	22.149	983	Rotting_nut/pod/seed/fruit	Hawaii	Hawaii	North America
Class II	NIC511	NIC511	12.5789	40.8625	14.2624	40.8625	40	Rotting_nut/pod/seed/fruit	Campania	Italia	Europe
Class II	AB1	AB1	12.525	-34.93	138.59	34.93	41	Soil	South Australia	Australia	Oceania
Class II	NIC259	NIC259	12.525	38.7183	-9.14875	38.7183	57	Rotting_nut/pod/seed/fruit	Lisbon Metropolitan Area	Portugal	Europe
Class II	JU2592	JU2592	12.4737	48.6286	-2.40384	48.6286	44	Rotting_nut/pod/seed/fruit	Brittany	France	Europe
Class II	PS2025	PS2025	12.45	34.19	-118.13	34.19	423	None	California	USA	North America
Class II	JU2576	JU2576	12.4	49.0861	3.072	49.0861	58	Rotting_stem	Ile-de-France	France	Europe
Class II	NIC207	NIC207	12.375	43.7205	7.24045	43.7205	198	Rotting_nut/pod/seed/fruit	Provence-Alpes-Cote d Azur	France	Europe
Class II	ED3017	ED3017	12.3	55.92	-3.19	55.92	85	Compost	Scotland	Scotland	Europe
Class II	JU1568	JU1568	12.3	48.8092	2.3862	48.8092	42	Rotting_stem	Ile-de-France	France	Europe
Class II	JU2534	JU2534	12.3	49.3579	0.097087	49.3579	46	Rotting_nut/pod/seed/fruit	Normandy	France	Europe
Class II	LKC34	LKC34	12.3	-18	46	18	686	Rotting_nut/pod/seed/fruit	Antananarivo Province	Madagascar	Africa
Class II	JU2570	JU2570	12.2632	46.2657	-0.2685	46.2657	88	Rotting_nut/pod/seed/fruit	Nouvelle-Aquitaine	France	Europe
Class II	NIC1698	NIC1698	12.25	38.6336	-0.137348	38.6336	211	Vegetal_litter/mix	Xirles, Spain	Spain	Europe
Class II	NIC277	NIC277	12.225	43.7166	7.26652	43.7166	43	Rotting_nut/pod/seed/fruit	Provence-Alpes-Cote d Azur	France	Europe
Class II	QG2854	QG2854	12.2	-28.0826	152.507	28.0826	506	Rotting_nut/pod/seed/fruit	Queensland	Australia	Oceania
Class II	JU1896	JU1896	12.1071	37.9997	23.7497	37.9997	190	Rotting_nut/pod/seed/fruit	Attica	Greece	Europe
Class II	NIC515	NIC515	12.05	38.7768	-9.16588	38.7768	61	Rotting_nut/pod/seed/fruit	Lisbon	Portugal	Europe
Class II	ECA701	ECA701	12	22.1233	-159.656	22.1233	1156	Rotting_flower	Kaui, Hawaii	Hawaii	North America
Class II	JU3135	JU3135	12	48.7015	2.1725	48.7015	65	Rotting_nut/pod/seed/fruit	Ile-de-France	France	Europe
Class II	CB4854	CB4854	11.975	None	None	NA	412	Vegetal_litter/mix	California	USA	North America
Class II	JU2007	JU2007	11.95	50.7608	-1.32413	50.7608	6	Rotting_nut/pod/seed/fruit	England	England	Europe
Class II	CX11315	CX11315	11.925	34.1301	-118.115	34.1301	204	Soil	California	USA	North America
Class II	JU2478	JU2478	11.85	50.85	4.351	50.85	18	Compost	Brussels	Belgium	Europe
Class II	NIC514	NIC514	11.85	38.776	-9.16714	38.776	79	Rotting_nut/pod/seed/fruit	Lisbon	Portugal	Europe
Class II	ECA722	ECA722	11.8	19.424	-155.223	19.424	1118	Vegetal_litter/mix	Hawaii island, Hawaii	Hawaii	North America
Class II	MY2530	MY2530	11.75	54.3464	10.1177	54.3464	26	Compost	Schleswig-Holstein	Germany	Europe
Class II	CB4856	CB4856	11.7237	21.33	-157.86	21.33	60	Rotting_nut/pod/seed/fruit	Hawaii	Hawaii	North America
Class II	JU2250	JU2250	11.7	48.2853	-1.89139	48.2853	137	Rotting_nut/pod/seed/fruit	Brittany	France	Europe
Class II	JU2841	JU2841	11.65	-40	176	40	596	Mollusk	None	NA	NA
Class II	NIC1049	NIC1049	11.6	43.5936	1.45032	43.5936	145	Compost	Occitanie	France	Europe
Class II	JU3224	JU3224	11.5333	-41.2962	174.785	41.2962	15	Rotting_nut/pod/seed/fruit	Wellington	New Zealand	Oceania
Class II	QG2825	QG2825	11.5333	-34.4511	116.033	34.4511	119	Rotting_flower	Western Australia	Australia	Oceania
Class II	BRC20067	BRC20067	11.5	24.073	121.17	24.073	1994	Rotting_nut/pod/seed/fruit	Taiwan	Taiwan	Asia
Class II	CB4858	NA	11.5	-34.93	138.59	34.93	NA	NA	#N/A	#N/A
Class II	ECA741	ECA741	11.5	20.6702	-156.336	20.6702	1712	Rotting_nut/pod/seed/fruit	Hawaii island, Hawaii	Hawaii	North America
Class II	NIC1780	NIC1780	11.475	28.4111	-16.5355	28.4111	114	Rotting_nut/pod/seed/fruit	Botanical garden, Puerto de la Cruz	Spain	Europe
Class II	JU2106	JU2106	11.4737	43.06	0.24	43.06	487	Compost	Occitanie	France	Europe
Class II	JU310	JU310	11.4615	46.63	1.06	46.63	97	Compost	Centre	France	Europe
Class II	JU2878	JU2878	11.45	19.2973	-99.0988	19.2973	2234	Rotting_nut/pod/seed/fruit	Mexico City	Mexico	North America
Class II	JU561	JU561	11.45	48.71	-3.81	48.71	28	Arthropod	Bretagne	France	Europe
Class II	ECA348	ECA348	11.4	37.7753	-122.254	37.7753	4	Rotting_nut/pod/seed/fruit	Alameda, USA	USA	North America
Class II	JU1172	JU1172	11.4	-36.87	-73.04	36.87	60	Compost	Region del Bio Bio	Chili	South America
Class II	JU3144	JU3144	11.4	6.18	10.52	6.18	2736	Vegetal_litter/mix	Northwest	Canada	North America
Class II	EG4724	EG4724	11.35	41.6288	-8.3476	41.6288	101	Rotting_nut/pod/seed/fruit	Braga	Portugal	Europe
Class II	JU3228	JU3228	11.3	-38.6484	176.089	38.6484	573	Vegetal_litter/mix	Waikato	New Zealand	Oceania
Class II	QG557	QG557	11.175	34.4216	-119.702	34.4216	19	Rotting_nut/pod/seed/fruit	California	USA	North America
Class II	JU3128	JU3128	11.075	37.076	15.2763	37.076	13	Rotting_nut/pod/seed/fruit	Sicily	Italia	Europe
Class II	NIC2	NIC2	11.075	43.279	5.3543	43.279	13	Rotting_stem	Provence-Alpes-Cote d Azur	France	Europe
Class II	NIC1802	NIC1802	11.0286	28.4111	-16.5355	28.4111	114	Rotting_stem	Botanical garden, Puerto de la Cruz	Spain	Europe
Class II	JU2907	JU2907	11	43.8021	11.2906	43.8021	167	Compost	Tuscany	Italia	Europe
Class II	MY2713	MY2713	11	54.3491	10.1151	54.3491	25	Arthropod	Schleswig-Holstein	Germany	Europe
Class II	QX1211	QX1211	10.9875	37.7502	-122.433	37.7502	65	Rotting_nut/pod/seed/fruit	California	USA	North America
Class II	NIC1779	NIC1779	10.9737	28.5334	-16.2797	28.5334	914	Arthropod	Anaga mountains, Cruz del Carmen, Laurelforest	Spain	Europe
Class II	JU1934	JU1934	10.925	49.126	1.95114	49.126	67	Rotting_stem	Ile-de-France	France	Europe
Class II	JU2572	JU2572	10.9	48.8126	2.39537	48.8126	34	Rotting_stem	Ile-de-France	France	Europe
Class II	JU1530	JU1530	10.85	48.7015	2.1725	48.7015	65	Rotting_nut/pod/seed/fruit	Ile-de-France	France	Europe
Class II	QG2932	QG2932	10.8333	-28.0538	152.395	28.0538	832	Rotting_nut/pod/seed/fruit	Queensland	Australia	Oceania
Class II	KR314	KR314	10.8	49.28	-123.13	49.28	39	Rotting_nut/pod/seed/fruit	British Columbia	Canada	North America
Class II	MY518	MY518	10.8	51.9642	7.61172	51.9642	60	Compost	North Rhine-Westphalia	Germany	Europe
Class II	XZ1515	XZ1515	10.75	22.149	-159.668	22.149	983	Rotting_nut/pod/seed/fruit	Hawaii	Hawaii	North America
Class II	QG2828	QG2828	10.7333	-31.9547	115.845	31.9547	56	Vegetal_litter/mix	Western Australia	Australia	Oceania
Class II	JU2862	JU2862	10.7	52.1944	0.1264	52.1944	16	Rotting_stem	England	England	Europe
Class II	QG2837	QG2837	10.7	-27.3308	152.759	27.3308	676	Rotting_nut/pod/seed/fruit	Queensland	Australia	Oceania
Class II	ECA640	ECA640	10.6667	34.0654	-118.441	34.0654	113	Rotting_nut/pod/seed/fruit	Los Angeles, USA	USA	North America
Class II	JU3282	JU3282	10.6333	50.0711	14.4203	50.0711	199	Rotting_stem	Hlavni mesto Praha	Czech Republic	Europe
Class II	NIC3	NIC3	10.6	43.3636	5.3215	43.3636	55	Rotting_nut/pod/seed/fruit	Provence-Alpes-Cote d Azur	France	Europe
Class II	JU1440	JU1440	10.575	41.4131	2.15231	41.4131	137	Rotting_nut/pod/seed/fruit	Catalunya	Spain	Europe
Class II	JU2526	JU2526	10.525	38.7175	-9.1486	38.7175	66	Rotting_nut/pod/seed/fruit	Lisbon	Portugal	Europe
Class II	WN2001	WN2001	10.525	51.9544	6.30341	51.9544	16	Compost	Gelderland	Netherlands	Europe
Class II	ECA191	ECA191	10.5224	19.4242	-155.222	19.4242	1115	Rotting_flower	Hawaii	Hawaii	North America
Class II	JU2016	JU2016	10.5	37.7576	-122.463	37.7576	113	Rotting_nut/pod/seed/fruit	California	USA	North America
Class II	JU2600	JU2600	10.45	49.126	1.95114	49.126	57	Rotting_nut/pod/seed/fruit	Ile-de-France	France	Europe
Class II	JU2586	JU2586	10.4	48.897	2.159	48.897	37	Rotting_nut/pod/seed/fruit	Ile-de-France	France	Europe
Class II	JU1212	JU1212	10.325	48.71	-3.81	48.71	28	Rotting_flower	Bretagne	France	Europe
Class II	ECA36	ECA36	10.275	-36.8933	174.746	36.8933	46	Vegetal_litter/mix	Auckland, New Zealand	New Zealand	Oceania
Class II	JU2879	JU2879	10.275	19.2973	-99.0988	19.2973	2234	Rotting_nut/pod/seed/fruit	Mexico City	Mexico	North America
Class II	JU1400	JU1400	10.25	37.3845	-5.988	37.3845	8	Rotting_nut/pod/seed/fruit	Andalucía	Spain	Europe
Class II	NIC1107	NIC1107	10.15	43.7163	7.26694	43.7163	41	Rotting_nut/pod/seed/fruit	Provence-Alpes-Cote d Azur	France	Europe
Class II	NIC261	NIC261	10.1375	38.7183	-9.14875	38.7183	57	Rotting_nut/pod/seed/fruit	Lisbon Metropolitan Area	Portugal	Europe
Class II	JU1088	JU1088	10.075	34.7613	138.015	34.7613	35	Soil	Shizuoka-ken	Japan	Asia
Class II	ECA742	ECA742	10.0667	20.8057	-156.278	20.8057	1157	Vegetal_litter/mix	Hawaii island, Hawaii	Hawaii	North America
Class II	MY2147	MY2147	10	54.3464	10.1177	54.3464	26	Compost	Schleswig-Holstein	Germany	Europe
Class I	JU774	JU774	9.975	38.683	-9.34	38.683	16	Compost	Lisbon	Portugal	Europe
Class I	NIC1805	NIC1805	9.96296	28.4983	-16.3993	28.4983	491	Rotting_flower	Rural garden, Tacoronte	Spain	Europe
Class I	JU2017	JU2017	9.95	37.7576	-122.463	37.7576	113	Rotting_stem	California	USA	North America
Class I	XZ1734	XZ1734	9.93333	-23.5	-46.7	23.5	756	Rotting_nut/pod/seed/fruit	Sao Paulo	Brazil	South America
Class I	ECA723	ECA723	9.9	19.4243	-155.222	19.4243	1114	Vegetal_litter/mix	Hawaii island, Hawaii	Hawaii	North America
Class I	MY16	MY16	9.9	51.93	7.57	51.93	61	Compost	North Rhine-Westphalia	Germany	Europe
Class I	QG2075	QG2075	9.875	33.951	-83.376	33.951	195	Fungus	Georgia	USA	North America
Class I	XZ1513	XZ1513	9.8	22.1479	-159.631	22.1479	1270	Rotting_nut/pod/seed/fruit	Hawaii	Hawaii	North America
Class I	EG4946	EG4946	9.7	40.7073	-111.868	40.7073	1416	Rotting_nut/pod/seed/fruit	Utah	USA	North America
Class I	QX1792	QX1792	9.7	20.7055	-156.355	20.7055	882	Rotting_nut/pod/seed/fruit	Hawaii	Hawaii	North America
Class I	RC301	RC301	9.7	54.3464	10.1177	54.3464	268	Compost	Baden-Wurttemberg	Germany	Europe
Class I	CB4853	NA	9.6875	34.1371	-118.125	34.1371	NA	NA	#N/A	#N/A
Class I	ECA396	ECA396	9.68571	19.4498	-155.235	19.4498	1136	Rotting_nut/pod/seed/fruit	Hawaii	Hawaii	North America
Class I	NIC1798	NIC1798	9.67123	28.4111	-16.5355	28.4111	114	Rotting_nut/pod/seed/fruit	Botanical garden, Puerto de la Cruz	Spain	Europe
Class I	QG2846	QG2846	9.5	-28.2043	153.191	28.2043	885	Rotting_nut/pod/seed/fruit	Queensland	Australia	Oceania
Class I	CX11314	CX11314	9.375	34.1295	-118.11	34.1295	204	Soil	California	USA	North America
Class I	MY2212	MY2212	9.2	54.3464	10.1177	54.3464	26	Arthropod	Schleswig-Holstein	Germany	Europe
Class I	QG2823	QG2823	9.16667	-34.4511	116.033	34.4511	118	Rotting_nut/pod/seed/fruit	Western Australia	Australia	Oceania
Class I	JU3166	JU3166	9.13333	0.28417	6.59837	0.28417	1353	Fungus	Sao Tome	Portugal	Europe
Class I	NIC1809	NIC1809	9.05405	28.4983	-16.3993	28.4983	491	Rotting_nut/pod/seed/fruit	Rural garden, Tacoronte	Spain	Europe
Class I	CB4852	CB4852	9.025	None	None	NA	None	None	None	NA	NA
Class I	CX11262	CX11262	9	34.1301	-118.115	34.1301	213	Soil	California	USA	North America
Class I	JU2838	JU2838	8.95	20.206	-97.9883	20.206	1302	Rotting_nut/pod/seed/fruit	Puebla	Mexico	North America
Class I	JU2234	JU2234	8.85	47.227	-1.583	47.227	37	Rotting_nut/pod/seed/fruit	Pays de la Loire	France	Europe
Class I	QG2857	QG2857	8.8	-28.0806	152.504	28.0806	511	Rotting_nut/pod/seed/fruit	Queensland	Australia	Oceania
Class I	JU1586	JU1586	8.78049	46.63	1.06	46.63	97	Rotting_nut/pod/seed/fruit	Centre	France	Europe
Class I	QG2832	QG2832	8.76667	-27.3311	152.764	27.3311	625	Fungus	Queensland	Australia	Oceania
Class I	JU3132	JU3132	8.7	48.7015	2.1725	48.7015	65	Rotting_nut/pod/seed/fruit	Ile-de-France	France	Europe
Class I	MY2535	MY2535	8.65	52.0065	-1.89739	52.0065	65	Compost	North Rhine-Westphalia	Germany	Europe
Class I	JU2610	JU2610	8.55	49.1075	1.7915	49.1075	130	Rotting_nut/pod/seed/fruit	Ile-de-France	France	Europe
Class I	WN2064	WN2064	8.46667	51.9747	5.68639	51.9747	20	Compost	Gelderland	Netherlands	Europe
Class I	MY2693	MY2693	8.45	54.3491	10.1151	54.3491	25	Mollusk	Schleswig-Holstein	Germany	Europe
Class I	EG4347	EG4347	8.30556	44.0479	-123.071	44.0479	130	Rotting_nut/pod/seed/fruit	Oregon	USA	North America
Class I	QX1794	QX1794	8.3	20.7056	-156.357	20.7056	865	Compost	Hawaii	Hawaii	North America
Class I	MY920	MY920	8.2	37.994	23.7496	37.994	26	Compost	Schleswig-Holstein	Germany	Europe
Class I	ECA363	ECA363	8.18571	20.7233	-156.305	20.7233	1630	Vegetal_litter/mix	Hawaii	Hawaii	North America
Class I	XZ1516	XZ1516	8.11765	22.149	-159.668	22.149	983	Rotting_nut/pod/seed/fruit	Hawaii	Hawaii	North America
Class I	ECA740	ECA740	8.06667	20.67	-156.339	20.67	1772	Rotting_nut/pod/seed/fruit	Hawaii island, Hawaii	Hawaii	North America
Class I	QG2841	QG2841	8.03333	-28.2446	153.209	28.2446	1018	Rotting_nut/pod/seed/fruit	Queensland	Australia	Oceania
Class I	QG2843	QG2843	7.86667	-28.2402	153.195	28.2402	788	Rotting_nut/pod/seed/fruit	Queensland	Australia	Oceania
Class I	ECA349	ECA349	7.75	32.7658	-117.237	32.7658	3	Rotting_nut/pod/seed/fruit	San Diego, USA	USA	North America
Class I	JU2619	JU2619	7.6	32.9984	-117.275	32.9984	21	Compost	California	USA	North America
Class I	MY2585	MY2585	7	54.3464	10.1177	54.3464	26	Compost	Schleswig-Holstein	Germany	Europe
Class I	QG2836	QG2836	6.9	-27.3308	152.759	27.3308	676	Rotting_nut/pod/seed/fruit	Queensland	Australia	Oceania
Class I	QG2855	QG2855	5.96296	-28.0806	152.505	28.0806	506	Rotting_nut/pod/seed/fruit	Queensland	Australia	Oceania
Class I	QG2873	QG2873	5.6	-27.369	152.183	27.369	635	Rotting_nut/pod/seed/fruit	Queensland	Australia	Oceania
