# Supplementary material for: Natural variation in the Caenorhabditis elegans egg-laying circuit modulates an intergenerational fitness trade-off
Source: eLife. 2024 Apr 2;12:RP88253. doi: 10.7554/eLife.88253 (PMC10987095; doi:10.7554/eLife.88253)
Supplement: Figure 1—figure supplement 2—source data 1. [file elife-88253-fig1-figsupp2-data1.xlsx]

## Sheet: Figure 1 - figure supplement 2
Class	Strain	Isotype	Genotype	Mean egg retention
Class III	JU751	JU751	swept	48.54
Class III	JU2829	JU2829	swept	36.45
Class III	CX11276	CX11276	swept	35.875
Class III	JU830	JU830	swept	34.45
Class III	NIC1832	NIC1832	NA	34.1406
Class III	JU440	JU440	swept	32.125
Class III	ED3005	ED3005	swept	30.25
Class III	JU2593	JU2593	swept	29.4583
Class III	NIC1786	NIC1786	NA	28.775
Class III	NIC275	NIC275	swept	26.125
Class III	JU397	JU397	swept	25.275
Class III	JU2587	JU2587	swept	25.175
Class III	JU346	JU346	swept	25.05
Class III	QX1793	QX1793	divergent	25.05
Class II	JU2316	JU2316	divergent	24.05
Class II	NIC256	NIC256	swept	23.575
Class II	NIC1782	NIC1782	NA	23.5
Class II	NIC265	NIC265	divergent	23.475
Class II	NIC251	NIC251	divergent	23.4
Class II	JU1249	JU1249	swept	22.95
Class II	XZ1672	XZ1672	swept	22.9333
Class II	NIC1792	NIC1792	NA	22.8608
Class II	JU311	JU311	swept	22.85
Class II	QW947	QW947	swept	22.75
Class II	MY23	MY23	divergent	22.6
Class II	NIC1788	NIC1788	NA	22.6
Class II	DL200	DL200	swept	22.4
Class II	ECA745	ECA745	divergent	22.2
Class II	NIC236	NIC236	swept	22.025
Class II	ECA743	ECA743	divergent	21.7
Class II	MY10	MY10	swept	21.625
Class II	JU792	JU751	swept	21.325
Class II	JU2565	JU2565	swept	21.2
Class II	ED3011	ED3011	swept	21.1
Class II	JU1200	JU1200	swept	20.8769
Class II	JU1242	JU1242	swept	20.875
Class II	CX11254	CX11254	swept	20.825
Class II	NIC1799	NIC1799	NA	20.7436
Class II	JU394	JU394	swept	20.725
Class II	JT11398	JT11398	swept	20.0625
Class II	DL226	DL226	swept	20.05
Class II	JU258	JU258	swept	19.9667
Class II	MY18	MY18	swept	19.95
Class II	JU782	JU751	swept	19.4833
Class II	JU1792	JU1792	swept	19.35
Class II	JU2131	JU2131	swept	19.3
Class II	JU323	JU323	swept	19.2
Class II	ECA372	ECA372	divergent	19.1857
Class II	JU393	JU393	swept	18.85
Class II	NIC274	NIC274	swept	18.8
Class II	NIC242	NIC242	swept	18.775
Class II	JU778	JU751	swept	18.675
Class II	ED3049	ED3049	swept	18.5
Class II	MY795	MY795	swept	18.375
Class II	NIC1789	NIC1789	NA	18.3143
Class II	JU3140	JU3140	swept	18.1
Class II	NIC513	NIC513	swept	18
Class II	ECA724	ECA724	divergent	17.9667
Class II	ECA369	ECA369	divergent	17.9429
Class II	JU1213	JU1213	swept	17.9
Class II	WN2033	WN2033	swept	17.8571
Class II	JU2581	JU2581	swept	17.825
Class II	NIC260	NIC260	swept	17.7
Class II	CX11307	CX11307	swept	17.625
Class II	ED3040	ED3040	swept	17.5
Class II	NIC166	NIC166	swept	17.4
Class II	NIC231	NIC231	swept	17.4
Class II	NIC252	NIC252	swept	17.375
Class II	ECA710	ECA710	divergent	17.3667
Class II	JU2141	JU2141	swept	17.3
Class II	JU2257	JU2257	swept	17.3
Class II	NIC1790	NIC1790	NA	17.2564
Class II	JU2519	JU2519	swept	17.175
Class II	ED3046	ED3046	swept	17.15
Class II	ECA746	ECA746	divergent	17.1
Class II	NIC271	NIC271	swept	17.1
Class II	CB4932	CB4932	swept	17.025
Class II	QG556	QG556	swept	16.975
Class II	NIC1785	NIC1785	NA	16.9524
Class II	NIC501	NIC501	swept	16.9474
Class II	JU1491	JU1491	swept	16.925
Class II	NIC1794	NIC1794	NA	16.8919
Class II	JU3226	JU3226	divergent	16.8
Class II	MY1	MY1	swept	16.8
Class II	CB4857	NA	swept	16.775
Class II	QG2835	QG2835	swept	16.6667
Class II	XZ1756	XZ1756	swept	16.6667
Class II	PB303	PB303	swept	16.65
Class II	JU406	JU406	swept	16.575
Class II	QG2827	QG2827	swept	16.5667
Class II	WN2002	WN2002	swept	16.55
Class II	JU1543	JU1543	swept	16.45
Class II	JU1246	JU1246	swept	16.425
Class II	JU2800	JU2800	swept	16.35
Class II	QG536	QG536	swept	16.3
Class II	NIC1791	NIC1791	NA	16.2785
Class II	NIC1812	NIC1812	NA	16.275
Class II	JU2001	JU2001	swept	16.175
Class II	JU2853	JU2853	swept	16.15
Class II	NIC268	NIC268	divergent	16.15
Class II	ECA738	ECA738	divergent	16
Class II	NIC1796	NIC1796	NA	15.9706
Class II	ECA594	ECA594	swept	15.9667
Class II	JU1666	JU1666	swept	15.7571
Class II	CX11292	CX11292	swept	15.7
Class II	NIC267	NIC267	swept	15.7
Class II	ECA923	ECA923	swept	15.6333
Class II	NIC1808	NIC1808	NA	15.6154
Class II	EG4725	EG4725	swept	15.6
Class II	NIC1	NIC1	swept	15.575
Class II	NIC258	NIC258	swept	15.55
Class II	NIC523	NIC523	swept	15.55
Class II	ED3077	ED3077	swept	15.525
Class II	NIC266	NIC266	swept	15.525
Class II	N2	N2	swept	15.475
Class II	JU3167	JU3167	divergent	15.4667
Class II	JU1808	JU1808	swept	15.4
Class II	NIC1783	NIC1783	NA	15.3621
Class II	CX11271	CX11271	swept	15.325
Class II	JU2513	JU2513	swept	15.275
Class II	JU2575	JU2575	swept	15.15
Class II	MY2741	MY2741	swept	15.0286
Class II	NIC1801	NIC1801	NA	14.9459
Class II	QX1212	QX1212	swept	14.925
Class II	CB4851	NA	swept	14.85
Class II	JU2811	JU2811	swept	14.85
Class II	NIC195	NIC195	swept	14.75
Class II	JU1395	JU1395	swept	14.725
Class II	PX179	PX179	swept	14.725
Class II	QG2818	QG2818	swept	14.7
Class II	ED3048	ED3048	swept	14.575
Class II	NIC276	NIC276	swept	14.575
Class II	MY2453	MY2453	swept	14.55
Class II	QX1233	QX1233	swept	14.55
Class II	ECA592	ECA592	swept	14.5333
Class II	JU3137	JU3137	swept	14.4857
Class II	JU1409	JU1409	swept	14.425
Class II	MY679	MY679	swept	14.4
Class II	NIC522	NIC522	swept	14.4
Class II	MY2573	MY2573	swept	14.35
Class II	ECA928	ECA928	swept	14.3
Class II	JU1581	JU1581	swept	14.175
Class II	NIC262	NIC262	swept	14.15
Class II	NIC269	NIC269	swept	14.15
Class II	ECA593	ECA593	divergent	14.1
Class II	WN2063	WN2063	swept	14.1
Class II	JU3169	JU3169	swept	14.0667
Class II	BRC20263	BRC20263	swept	14
Class II	QG2874	QG2874	swept	13.9833
Class II	XZ2019	XZ2019	divergent	13.9667
Class II	JU2464	JU2464	swept	13.95
Class II	ED3073	ED3073	swept	13.9
Class II	ECA347	ECA347	divergent	13.8667
Class II	ECA744	ECA744	divergent	13.8333
Class II	CX11285	CX11285	swept	13.775
Class II	ED3052	ED3052	swept	13.775
Class II	QG2875	QG2875	swept	13.6333
Class II	DL238	DL238	divergent	13.625
Class II	NIC199	NIC199	swept	13.55
Class II	WN2050	WN2050	swept	13.5
Class II	JU360	JU360	swept	13.45
Class II	CX11264	CX11264	swept	13.35
Class II	JU2906	JU2906	swept	13.35
Class II	QG2850	QG2850	swept	13.3
Class II	EG4349	EG4349	swept	13.25
Class II	JU2522	JU2522	swept	13.15
Class II	QG2811	QG2811	swept	13.1
Class II	QX1791	QX1791	divergent	13.075
Class II	XZ1735	XZ1735	swept	13.0667
Class II	ECA189	ECA189	divergent	13.0429
Class II	ECA706	ECA706	divergent	13
Class II	JU1793	JU1793	swept	13
Class II	JU2466	JU2466	swept	12.95
Class II	JU847	JU751	swept	12.9333
Class II	PB306	NA	swept	12.925
Class II	QG2838	QG2838	swept	12.9
Class II	WN2066	WN2066	swept	12.8889
Class II	NIC255	NIC255	swept	12.875
Class II	NIC272	NIC272	swept	12.875
Class II	GXW1	GXW1	swept	12.85
Class II	JU2825	JU2825	swept	12.85
Class II	JU775	JU775	swept	12.825
Class II	NIC1787	NIC1787	NA	12.7931
Class II	JU367	JU367	swept	12.725
Class II	MY772	MY772	swept	12.7
Class II	ED3012	ED3012	swept	12.675
Class II	ECA930	ECA930	swept	12.6667
Class II	XZ1514	XZ1514	divergent	12.5857
Class II	NIC511	NIC511	swept	12.5789
Class II	AB1	AB1	swept	12.525
Class II	NIC259	NIC259	swept	12.525
Class II	JU2592	JU2592	swept	12.4737
Class II	PS2025	PS2025	swept	12.45
Class II	JU2576	JU2576	swept	12.4
Class II	NIC207	NIC207	swept	12.375
Class II	ED3017	ED3017	swept	12.3
Class II	JU1568	JU1568	swept	12.3
Class II	JU2534	JU2534	swept	12.3
Class II	LKC34	LKC34	swept	12.3
Class II	JU2570	JU2570	swept	12.2632
Class II	NIC1698	NIC1698	NA	12.25
Class II	NIC277	NIC277	swept	12.225
Class II	QG2854	QG2854	swept	12.2
Class II	JU1896	JU1896	swept	12.1071
Class II	NIC515	NIC515	swept	12.05
Class II	ECA701	ECA701	NA	12
Class II	JU3135	JU3135	swept	12
Class II	CB4854	CB4854	swept	11.975
Class II	JU2007	JU2007	swept	11.95
Class II	CX11315	CX11315	swept	11.925
Class II	JU2478	JU2478	swept	11.85
Class II	NIC514	NIC514	swept	11.85
Class II	ECA722	ECA722	divergent	11.8
Class II	MY2530	MY2530	swept	11.75
Class II	CB4856	CB4856	divergent	11.7237
Class II	JU2250	JU2250	swept	11.7
Class II	JU2841	JU2841	swept	11.65
Class II	NIC1049	NIC1049	swept	11.6
Class II	JU3224	JU3224	swept	11.5333
Class II	QG2825	QG2825	swept	11.5333
Class II	BRC20067	BRC20067	swept	11.5
Class II	CB4858	NA	swept	11.5
Class II	ECA741	ECA741	divergent	11.5
Class II	NIC1780	NIC1780	NA	11.475
Class II	JU2106	JU2106	swept	11.4737
Class II	JU310	JU310	swept	11.4615
Class II	JU2878	JU2878	swept	11.45
Class II	JU561	JU561	swept	11.45
Class II	ECA348	ECA348	swept	11.4
Class II	JU1172	JU1172	swept	11.4
Class II	JU3144	JU3144	swept	11.4
Class II	EG4724	EG4724	swept	11.35
Class II	JU3228	JU3228	swept	11.3
Class II	QG557	QG557	swept	11.175
Class II	JU3128	JU3128	swept	11.075
Class II	NIC2	NIC2	swept	11.075
Class II	NIC1802	NIC1802	NA	11.0286
Class II	JU2907	JU2907	swept	11
Class II	MY2713	MY2713	swept	11
Class II	QX1211	QX1211	divergent	10.9875
Class II	NIC1779	NIC1779	NA	10.9737
Class II	JU1934	JU1934	swept	10.925
Class II	JU2572	JU2572	swept	10.9
Class II	JU1530	JU1530	swept	10.85
Class II	QG2932	QG2932	swept	10.8333
Class II	KR314	KR314	swept	10.8
Class II	MY518	MY518	swept	10.8
Class II	XZ1515	XZ1515	swept	10.75
Class II	QG2828	QG2828	swept	10.7333
Class II	JU2862	JU2862	swept	10.7
Class II	QG2837	QG2837	swept	10.7
Class II	ECA640	ECA640	swept	10.6667
Class II	JU3282	JU3282	swept	10.6333
Class II	NIC3	NIC3	swept	10.6
Class II	JU1440	JU1440	swept	10.575
Class II	JU2526	JU2526	divergent	10.525
Class II	WN2001	WN2001	swept	10.525
Class II	ECA191	ECA191	divergent	10.5224
Class II	JU2016	JU2016	swept	10.5
Class II	JU2600	JU2600	swept	10.45
Class II	JU2586	JU2586	swept	10.4
Class II	JU1212	JU1212	swept	10.325
Class II	ECA36	ECA36	divergent	10.275
Class II	JU2879	JU2879	swept	10.275
Class II	JU1400	JU1400	swept	10.25
Class II	NIC1107	NIC1107	swept	10.15
Class II	NIC261	NIC261	swept	10.1375
Class II	JU1088	JU1088	swept	10.075
Class II	ECA742	ECA742	divergent	10.0667
Class II	MY2147	MY2147	swept	10
Class I	JU774	JU774	swept	9.975
Class I	NIC1805	NIC1805	NA	9.96296
Class I	JU2017	JU2017	swept	9.95
Class I	XZ1734	XZ1734	swept	9.93333
Class I	ECA723	ECA723	divergent	9.9
Class I	MY16	MY16	divergent	9.9
Class I	QG2075	QG2075	swept	9.875
Class I	XZ1513	XZ1513	divergent	9.8
Class I	EG4946	EG4946	swept	9.7
Class I	QX1792	QX1792	swept	9.7
Class I	RC301	RC301	swept	9.7
Class I	CB4853	NA	swept	9.6875
Class I	ECA396	ECA396	divergent	9.68571
Class I	NIC1798	NIC1798	NA	9.67123
Class I	QG2846	QG2846	swept	9.5
Class I	CX11314	CX11314	swept	9.375
Class I	MY2212	MY2212	swept	9.2
Class I	QG2823	QG2823	swept	9.16667
Class I	JU3166	JU3166	swept	9.13333
Class I	NIC1809	NIC1809	NA	9.05405
Class I	CB4852	CB4852	swept	9.025
Class I	CX11262	CX11262	swept	9
Class I	JU2838	JU2838	swept	8.95
Class I	JU2234	JU2234	swept	8.85
Class I	QG2857	QG2857	swept	8.8
Class I	JU1586	JU1586	swept	8.78049
Class I	QG2832	QG2832	swept	8.76667
Class I	JU3132	JU3132	swept	8.7
Class I	MY2535	MY2535	swept	8.65
Class I	JU2610	JU2610	swept	8.55
Class I	WN2064	WN2064	swept	8.46667
Class I	MY2693	MY2693	swept	8.45
Class I	EG4347	EG4347	swept	8.30556
Class I	QX1794	QX1794	divergent	8.3
Class I	MY920	MY920	swept	8.2
Class I	ECA363	ECA363	divergent	8.18571
Class I	XZ1516	XZ1516	divergent	8.11765
Class I	ECA740	ECA740	divergent	8.06667
Class I	QG2841	QG2841	swept	8.03333
Class I	QG2843	QG2843	swept	7.86667
Class I	ECA349	ECA349	swept	7.75
Class I	JU2619	JU2619	swept	7.6
Class I	MY2585	MY2585	swept	7
Class I	QG2836	QG2836	swept	6.9
Class I	QG2855	QG2855	swept	5.96296
Class I	QG2873	QG2873	swept	5.6
