# Supplementary material for: Natural variation in the Caenorhabditis elegans egg-laying circuit modulates an intergenerational fitness trade-off
Source: eLife. 2024 Apr 2;12:RP88253. doi: 10.7554/eLife.88253 (PMC10987095; doi:10.7554/eLife.88253)
Supplement: Figure 1—source data 1. [file elife-88253-fig1-data1.xlsx]

## Sheet: Figure 1 A
Strain	Individual	Eggs in utero	L1 in utero	Total offspring in utero
AB1	1	4	0	4
AB1	2	17	0	17
AB1	3	20	0	20
AB1	4	14	0	14
AB1	5	9	0	9
AB1	6	16	0	16
AB1	7	11	0	11
AB1	8	10	0	10
AB1	9	23	0	23
AB1	10	12	0	12
AB1	11	11	0	11
AB1	12	18	0	18
AB1	13	4	0	4
AB1	14	14	0	14
AB1	15	14	0	14
AB1	16	11	0	11
AB1	17	13	0	13
AB1	18	18	0	18
AB1	19	5	0	5
AB1	20	20	0	20
AB1	21	8	0	8
AB1	22	9	0	9
AB1	23	18	0	18
AB1	24	16	0	16
AB1	25	8	0	8
AB1	26	3	0	3
AB1	27	13	0	13
AB1	28	9	0	9
AB1	29	20	0	20
AB1	30	6	0	6
AB1	31	19	0	19
AB1	32	3	0	3
AB1	33	21	0	21
AB1	34	19	0	19
AB1	35	8	0	8
AB1	36	9	0	9
AB1	37	7	0	7
AB1	38	12	0	12
AB1	39	11	0	11
AB1	40	18	0	18
BRC20067	1	9	0	9
BRC20067	2	13	0	13
BRC20067	3	9	0	9
BRC20067	4	9	0	9
BRC20067	5	18	0	18
BRC20067	6	10	0	10
BRC20067	7	11	0	11
BRC20067	8	18	0	18
BRC20067	9	13	0	13
BRC20067	10	11	0	11
BRC20067	11	14	0	14
BRC20067	12	12	0	12
BRC20067	13	13	0	13
BRC20067	14	11	0	11
BRC20067	15	11	0	11
BRC20067	16	15	0	15
BRC20067	17	15	0	15
BRC20067	18	7	0	7
BRC20067	19	11	0	11
BRC20067	20	13	0	13
BRC20067	21	12	0	12
BRC20067	22	11	0	11
BRC20067	23	12	0	12
BRC20067	24	9	0	9
BRC20067	25	10	0	10
BRC20067	26	9	0	9
BRC20067	27	14	0	14
BRC20067	28	7	0	7
BRC20067	29	11	0	11
BRC20067	30	12	0	12
BRC20067	31	10	0	10
BRC20067	32	6	0	6
BRC20067	33	11	0	11
BRC20067	34	10	0	10
BRC20067	35	10	0	10
BRC20067	36	13	0	13
BRC20067	37	14	0	14
BRC20067	38	10	0	10
BRC20067	39	12	0	12
BRC20067	40	14	0	14
BRC20263	1	13	0	13
BRC20263	2	16	0	16
BRC20263	3	16	0	16
BRC20263	4	13	0	13
BRC20263	5	15	0	15
BRC20263	6	15	0	15
BRC20263	7	6	0	6
BRC20263	8	12	0	12
BRC20263	9	14	0	14
BRC20263	10	18	0	18
BRC20263	11	13	0	13
BRC20263	12	14	0	14
BRC20263	13	18	0	18
BRC20263	14	14	0	14
BRC20263	15	13	0	13
BRC20263	16	9	0	9
BRC20263	17	13	0	13
BRC20263	18	14	0	14
BRC20263	19	19	0	19
BRC20263	20	15	0	15
CB4851	1	25	0	25
CB4851	2	4	0	4
CB4851	3	6	0	6
CB4851	4	9	0	9
CB4851	5	20	0	20
CB4851	6	10	0	10
CB4851	7	9	0	9
CB4851	8	1	0	1
CB4851	9	9	0	9
CB4851	10	29	0	29
CB4851	11	18	0	18
CB4851	12	19	0	19
CB4851	13	2	0	2
CB4851	14	2	0	2
CB4851	15	9	0	9
CB4851	16	1	0	1
CB4851	17	8	0	8
CB4851	18	10	0	10
CB4851	19	19	0	19
CB4851	20	8	0	8
CB4851	21	8	0	8
CB4851	22	19	0	19
CB4851	23	39	0	39
CB4851	24	32	0	32
CB4851	25	4	0	4
CB4851	26	16	0	16
CB4851	27	16	0	16
CB4851	28	46	0	46
CB4851	29	21	0	21
CB4851	30	18	0	18
CB4851	31	18	0	18
CB4851	32	7	0	7
CB4851	33	12	0	12
CB4851	34	16	0	16
CB4851	35	24	0	24
CB4851	36	24	0	24
CB4851	37	18	0	18
CB4851	38	8	0	8
CB4851	39	12	0	12
CB4851	40	18	0	18
CB4852	1	10	0	10
CB4852	2	9	0	9
CB4852	3	3	0	3
CB4852	4	15	0	15
CB4852	5	10	0	10
CB4852	6	4	0	4
CB4852	7	9	0	9
CB4852	8	13	0	13
CB4852	9	10	0	10
CB4852	10	9	0	9
CB4852	11	6	0	6
CB4852	12	7	0	7
CB4852	13	6	0	6
CB4852	14	8	0	8
CB4852	15	10	0	10
CB4852	16	8	0	8
CB4852	17	7	0	7
CB4852	18	8	0	8
CB4852	19	10	0	10
CB4852	20	8	0	8
CB4852	21	6	0	6
CB4852	22	4	0	4
CB4852	23	13	0	13
CB4852	24	14	0	14
CB4852	25	9	0	9
CB4852	26	6	0	6
CB4852	27	10	0	10
CB4852	28	25	0	25
CB4852	29	5	0	5
CB4852	30	8	0	8
CB4852	31	2	0	2
CB4852	32	10	0	10
CB4852	33	5	0	5
CB4852	34	13	0	13
CB4852	35	12	0	12
CB4852	36	14	0	14
CB4852	37	7	0	7
CB4852	38	7	0	7
CB4852	39	10	0	10
CB4852	40	11	0	11
CB4853	1	7	0	7
CB4853	1	14	0	14
CB4853	2	10	0	10
CB4853	2	4	0	4
CB4853	3	9	0	9
CB4853	3	11	0	11
CB4853	4	5	0	5
CB4853	4	4	0	4
CB4853	5	7	0	7
CB4853	5	7	0	7
CB4853	6	5	0	5
CB4853	6	9	0	9
CB4853	7	9	0	9
CB4853	7	9	0	9
CB4853	8	9	0	9
CB4853	8	6	0	6
CB4853	9	11	0	11
CB4853	9	9	0	9
CB4853	10	8	0	8
CB4853	10	13	0	13
CB4853	11	1	0	1
CB4853	11	9	0	9
CB4853	12	11	0	11
CB4853	12	9	0	9
CB4853	13	12	0	12
CB4853	13	6	0	6
CB4853	14	9	0	9
CB4853	14	10	0	10
CB4853	15	9	0	9
CB4853	15	9	0	9
CB4853	16	4	0	4
CB4853	16	16	0	16
CB4853	17	13	0	13
CB4853	17	13	0	13
CB4853	18	10	0	10
CB4853	18	9	0	9
CB4853	19	9	0	9
CB4853	19	12	0	12
CB4853	20	4	0	4
CB4853	20	16	0	16
CB4853	21	10	0	10
CB4853	21	6	0	6
CB4853	22	9	0	9
CB4853	22	13	0	13
CB4853	23	10	0	10
CB4853	23	8	0	8
CB4853	24	16	0	16
CB4853	24	11	0	11
CB4853	25	17	0	17
CB4853	26	10	0	10
CB4853	27	9	0	9
CB4853	28	8	0	8
CB4853	29	12	0	12
CB4853	30	13	0	13
CB4853	31	12	0	12
CB4853	32	13	0	13
CB4853	33	13	0	13
CB4853	34	11	0	11
CB4853	35	10	0	10
CB4853	36	14	0	14
CB4853	37	7	0	7
CB4853	38	15	0	15
CB4853	39	9	0	9
CB4853	40	7	0	7
CB4854	1	8	0	8
CB4854	2	5	0	5
CB4854	3	12	0	12
CB4854	4	15	0	15
CB4854	5	12	0	12
CB4854	6	13	0	13
CB4854	7	9	0	9
CB4854	8	11	0	11
CB4854	9	14	0	14
CB4854	10	7	0	7
CB4854	11	19	0	19
CB4854	12	8	0	8
CB4854	13	13	0	13
CB4854	14	8	0	8
CB4854	15	17	0	17
CB4854	16	15	0	15
CB4854	17	7	0	7
CB4854	18	12	0	12
CB4854	19	10	0	10
CB4854	20	13	0	13
CB4854	21	5	0	5
CB4854	22	10	0	10
CB4854	23	9	0	9
CB4854	24	14	0	14
CB4854	25	15	0	15
CB4854	26	16	0	16
CB4854	27	12	0	12
CB4854	28	14	0	14
CB4854	29	4	0	4
CB4854	30	11	0	11
CB4854	31	17	0	17
CB4854	32	14	0	14
CB4854	33	11	0	11
CB4854	34	14	0	14
CB4854	35	14	0	14
CB4854	36	13	0	13
CB4854	37	16	0	16
CB4854	38	17	0	17
CB4854	39	14	0	14
CB4854	40	11	0	11
CB4856	1	22	0	22
CB4856	1	9	0	9
CB4856	2	5	0	5
CB4856	2	10	0	10
CB4856	3	12	0	12
CB4856	3	6	0	6
CB4856	4	18	0	18
CB4856	4	5	0	5
CB4856	5	13	0	13
CB4856	5	6	0	6
CB4856	6	5	0	5
CB4856	6	13	0	13
CB4856	7	10	0	10
CB4856	7	8	0	8
CB4856	8	9	0	9
CB4856	8	16	0	16
CB4856	9	11	0	11
CB4856	9	15	0	15
CB4856	10	11	0	11
CB4856	10	6	0	6
CB4856	11	9	0	9
CB4856	11	5	0	5
CB4856	12	19	0	19
CB4856	12	7	0	7
CB4856	13	16	0	16
CB4856	13	12	0	12
CB4856	14	9	0	9
CB4856	14	11	0	11
CB4856	15	7	0	7
CB4856	15	11	0	11
CB4856	16	11	0	11
CB4856	16	11	0	11
CB4856	17	16	0	16
CB4856	17	12	0	12
CB4856	18	14	0	14
CB4856	18	18	0	18
CB4856	19	12	0	12
CB4856	19	6	0	6
CB4856	20	9	0	9
CB4856	20	11	0	11
CB4856	21	10	0	10
CB4856	21	13	0	13
CB4856	22	13	0	13
CB4856	22	16	0	16
CB4856	23	14	0	14
CB4856	23	17	0	17
CB4856	24	17	0	17
CB4856	24	12	0	12
CB4856	25	14	0	14
CB4856	25	12	0	12
CB4856	26	5	0	5
CB4856	26	14	0	14
CB4856	27	16	0	16
CB4856	27	15	0	15
CB4856	28	8	0	8
CB4856	28	11	0	11
CB4856	29	9	0	9
CB4856	29	14	0	14
CB4856	30	14	0	14
CB4856	30	9	0	9
CB4856	31	9	0	9
CB4856	31	14	0	14
CB4856	32	13	0	13
CB4856	32	12	0	12
CB4856	33	12	0	12
CB4856	33	12	0	12
CB4856	34	11	0	11
CB4856	34	12	0	12
CB4856	35	17	0	17
CB4856	35	10	0	10
CB4856	36	12	0	12
CB4856	36	9	0	9
CB4856	37	13	0	13
CB4856	38	13	0	13
CB4856	39	20	0	20
CB4856	40	13	0	13
CB4857	1	10	0	10
CB4857	2	15	0	15
CB4857	3	18	0	18
CB4857	4	19	0	19
CB4857	5	12	0	12
CB4857	6	18	0	18
CB4857	7	19	0	19
CB4857	8	20	0	20
CB4857	9	24	0	24
CB4857	10	17	0	17
CB4857	11	16	0	16
CB4857	12	16	0	16
CB4857	13	16	0	16
CB4857	14	23	0	23
CB4857	15	18	0	18
CB4857	16	19	0	19
CB4857	17	20	0	20
CB4857	18	21	0	21
CB4857	19	11	0	11
CB4857	20	13	0	13
CB4857	21	14	0	14
CB4857	22	14	0	14
CB4857	23	22	0	22
CB4857	24	20	0	20
CB4857	25	13	0	13
CB4857	26	7	0	7
CB4857	27	16	0	16
CB4857	28	20	0	20
CB4857	29	14	0	14
CB4857	30	19	0	19
CB4857	31	19	0	19
CB4857	32	7	0	7
CB4857	33	23	0	23
CB4857	34	15	0	15
CB4857	35	22	0	22
CB4857	36	22	0	22
CB4857	37	21	0	21
CB4857	38	14	0	14
CB4857	39	16	0	16
CB4857	40	8	0	8
CB4858	1	17	0	17
CB4858	2	7	0	7
CB4858	3	7	0	7
CB4858	4	11	0	11
CB4858	5	7	0	7
CB4858	6	8	0	8
CB4858	7	11	0	11
CB4858	8	12	0	12
CB4858	9	13	0	13
CB4858	10	12	0	12
CB4858	11	7	0	7
CB4858	12	8	0	8
CB4858	13	18	0	18
CB4858	14	17	0	17
CB4858	15	16	0	16
CB4858	16	9	0	9
CB4858	17	8	0	8
CB4858	18	7	0	7
CB4858	19	12	0	12
CB4858	20	11	0	11
CB4858	21	11	0	11
CB4858	22	18	0	18
CB4858	23	14	0	14
CB4858	24	14	0	14
CB4858	25	6	0	6
CB4858	26	15	0	15
CB4858	27	15	0	15
CB4858	28	15	0	15
CB4858	29	8	0	8
CB4858	30	13	0	13
CB4858	31	8	0	8
CB4858	32	12	0	12
CB4858	33	20	0	20
CB4858	34	5	0	5
CB4858	35	14	0	14
CB4858	36	12	0	12
CB4858	37	9	0	9
CB4858	38	8	0	8
CB4858	39	14	0	14
CB4858	40	11	0	11
CB4932	1	20	0	20
CB4932	1	19	0	19
CB4932	2	12	0	12
CB4932	2	26	0	26
CB4932	3	6	0	6
CB4932	3	20	0	20
CB4932	4	13	0	13
CB4932	4	21	0	21
CB4932	5	18	0	18
CB4932	5	18	0	18
CB4932	6	15	0	15
CB4932	6	20	0	20
CB4932	7	21	0	21
CB4932	7	14	0	14
CB4932	8	6	0	6
CB4932	8	15	0	15
CB4932	9	10	0	10
CB4932	9	23	0	23
CB4932	10	19	0	19
CB4932	10	16	0	16
CB4932	11	13	0	13
CB4932	11	13	0	13
CB4932	12	10	0	10
CB4932	12	17	0	17
CB4932	13	14	0	14
CB4932	13	15	0	15
CB4932	14	16	0	16
CB4932	14	16	0	16
CB4932	15	15	0	15
CB4932	15	14	0	14
CB4932	16	8	0	8
CB4932	16	13	0	13
CB4932	17	18	0	18
CB4932	17	16	0	16
CB4932	18	12	0	12
CB4932	18	15	0	15
CB4932	19	14	0	14
CB4932	19	18	0	18
CB4932	20	15	0	15
CB4932	20	16	0	16
CB4932	21	17	0	17
CB4932	21	18	0	18
CB4932	22	13	0	13
CB4932	22	18	0	18
CB4932	23	20	0	20
CB4932	23	27	0	27
CB4932	24	15	0	15
CB4932	24	25	0	25
CB4932	25	17	0	17
CB4932	25	19	0	19
CB4932	26	17	0	17
CB4932	26	16	0	16
CB4932	27	11	0	11
CB4932	27	19	0	19
CB4932	28	24	0	24
CB4932	28	19	0	19
CB4932	29	20	0	20
CB4932	29	19	0	19
CB4932	30	23	0	23
CB4932	30	26	0	26
CB4932	31	24	0	24
CB4932	31	15	0	15
CB4932	32	19	0	19
CB4932	32	20	0	20
CB4932	33	26	0	26
CB4932	33	15	0	15
CB4932	34	19	0	19
CB4932	34	9	0	9
CB4932	35	16	0	16
CB4932	35	10	0	10
CB4932	36	24	0	24
CB4932	36	19	0	19
CB4932	37	13	0	13
CB4932	37	23	0	23
CB4932	38	14	0	14
CB4932	38	18	0	18
CB4932	39	17	0	17
CB4932	39	18	0	18
CB4932	40	22	0	22
CB4932	40	18	0	18
CX11254	1	12	0	12
CX11254	2	26	0	26
CX11254	3	0	21	21
CX11254	4	10	0	10
CX11254	5	9	0	9
CX11254	6	10	0	10
CX11254	7	39	0	39
CX11254	8	27	0	27
CX11254	9	7	0	7
CX11254	10	21	0	21
CX11254	11	11	0	11
CX11254	12	16	0	16
CX11254	13	18	0	18
CX11254	14	27	0	27
CX11254	15	15	0	15
CX11254	16	11	0	11
CX11254	17	30	0	30
CX11254	18	20	0	20
CX11254	19	18	0	18
CX11254	20	14	0	14
CX11254	21	22	0	22
CX11254	22	14	0	14
CX11254	23	45	0	45
CX11254	24	24	0	24
CX11254	25	24	0	24
CX11254	26	26	0	26
CX11254	27	31	0	31
CX11254	28	30	0	30
CX11254	29	12	0	12
CX11254	30	36	0	36
CX11254	31	17	0	17
CX11254	32	27	0	27
CX11254	33	31	0	31
CX11254	34	22	0	22
CX11254	35	9	0	9
CX11254	36	22	0	22
CX11254	37	12	0	12
CX11254	38	33	0	33
CX11254	39	15	0	15
CX11254	40	19	0	19
CX11262	1	5	0	5
CX11262	2	9	0	9
CX11262	3	6	0	6
CX11262	4	14	0	14
CX11262	5	9	0	9
CX11262	6	7	0	7
CX11262	7	19	0	19
CX11262	8	7	0	7
CX11262	9	6	0	6
CX11262	10	18	0	18
CX11262	11	5	0	5
CX11262	12	10	0	10
CX11262	13	8	0	8
CX11262	14	8	0	8
CX11262	15	9	0	9
CX11262	16	10	0	10
CX11262	17	7	0	7
CX11262	18	3	0	3
CX11262	19	8	0	8
CX11262	20	11	0	11
CX11262	21	3	0	3
CX11262	22	11	0	11
CX11262	23	8	0	8
CX11262	24	15	0	15
CX11262	25	10	0	10
CX11262	26	10	0	10
CX11262	27	9	0	9
CX11262	28	11	0	11
CX11262	29	10	0	10
CX11262	30	13	0	13
CX11262	31	6	0	6
CX11262	32	4	0	4
CX11262	33	5	0	5
CX11262	34	15	0	15
CX11262	35	12	0	12
CX11262	36	10	0	10
CX11262	37	7	0	7
CX11262	38	5	0	5
CX11262	39	10	0	10
CX11262	40	7	0	7
CX11264	1	15	0	15
CX11264	2	13	0	13
CX11264	3	28	0	28
CX11264	4	15	0	15
CX11264	5	17	0	17
CX11264	6	10	0	10
CX11264	7	8	0	8
CX11264	8	8	0	8
CX11264	9	14	0	14
CX11264	10	8	0	8
CX11264	11	8	0	8
CX11264	12	5	0	5
CX11264	13	9	0	9
CX11264	14	13	0	13
CX11264	15	11	0	11
CX11264	16	13	0	13
CX11264	17	7	0	7
CX11264	18	9	0	9
CX11264	19	10	0	10
CX11264	20	12	0	12
CX11264	21	20	0	20
CX11264	22	12	0	12
CX11264	23	14	0	14
CX11264	24	14	0	14
CX11264	25	13	0	13
CX11264	26	11	0	11
CX11264	27	16	0	16
CX11264	28	14	0	14
CX11264	29	12	0	12
CX11264	30	18	0	18
CX11264	31	17	0	17
CX11264	32	19	0	19
CX11264	33	11	0	11
CX11264	34	14	0	14
CX11264	35	18	0	18
CX11264	36	9	0	9
CX11264	37	18	0	18
CX11264	38	16	0	16
CX11264	39	13	0	13
CX11264	40	22	0	22
CX11271	1	16	0	16
CX11271	2	4	0	4
CX11271	3	20	0	20
CX11271	4	15	0	15
CX11271	5	12	0	12
CX11271	6	19	0	19
CX11271	7	7	0	7
CX11271	8	12	0	12
CX11271	9	22	0	22
CX11271	10	13	0	13
CX11271	11	15	0	15
CX11271	12	15	0	15
CX11271	13	15	0	15
CX11271	14	11	0	11
CX11271	15	18	0	18
CX11271	16	19	0	19
CX11271	17	15	0	15
CX11271	18	12	0	12
CX11271	19	18	0	18
CX11271	20	17	0	17
CX11271	21	14	0	14
CX11271	22	23	0	23
CX11271	23	14	0	14
CX11271	24	14	0	14
CX11271	25	17	0	17
CX11271	26	17	0	17
CX11271	27	19	0	19
CX11271	28	14	0	14
CX11271	29	16	0	16
CX11271	30	19	0	19
CX11271	31	17	0	17
CX11271	32	18	0	18
CX11271	33	15	0	15
CX11271	34	12	0	12
CX11271	35	16	0	16
CX11271	36	14	0	14
CX11271	37	13	0	13
CX11271	38	17	0	17
CX11271	39	18	0	18
CX11271	40	11	0	11
CX11276	1	32	0	32
CX11276	2	41	0	41
CX11276	3	33	0	33
CX11276	4	42	0	42
CX11276	5	33	0	33
CX11276	6	38	0	38
CX11276	7	46	0	46
CX11276	8	35	0	35
CX11276	9	40	0	40
CX11276	10	28	0	28
CX11276	11	34	0	34
CX11276	12	51	0	51
CX11276	13	23	0	23
CX11276	14	39	0	39
CX11276	15	42	0	42
CX11276	16	48	0	48
CX11276	17	46	0	46
CX11276	18	28	0	28
CX11276	19	38	0	38
CX11276	20	10	0	10
CX11276	21	38	0	38
CX11276	22	32	0	32
CX11276	23	31	0	31
CX11276	24	27	0	27
CX11276	25	31	0	31
CX11276	26	36	0	36
CX11276	27	35	0	35
CX11276	28	45	0	45
CX11276	29	43	0	43
CX11276	30	39	0	39
CX11276	31	30	0	30
CX11276	32	33	0	33
CX11276	33	30	0	30
CX11276	34	45	0	45
CX11276	35	32	0	32
CX11276	36	46	0	46
CX11276	37	27	0	27
CX11276	38	33	0	33
CX11276	39	43	0	43
CX11276	40	32	0	32
CX11285	1	11	0	11
CX11285	2	5	0	5
CX11285	3	13	0	13
CX11285	4	12	0	12
CX11285	5	18	0	18
CX11285	6	17	0	17
CX11285	7	13	0	13
CX11285	8	15	0	15
CX11285	9	12	0	12
CX11285	10	13	0	13
CX11285	11	12	0	12
CX11285	12	13	0	13
CX11285	13	15	0	15
CX11285	14	11	0	11
CX11285	15	14	0	14
CX11285	16	15	0	15
CX11285	17	21	0	21
CX11285	18	15	0	15
CX11285	19	15	0	15
CX11285	20	20	0	20
CX11285	21	12	0	12
CX11285	22	14	0	14
CX11285	23	14	0	14
CX11285	24	13	0	13
CX11285	25	13	0	13
CX11285	26	14	0	14
CX11285	27	14	0	14
CX11285	28	10	0	10
CX11285	29	8	0	8
CX11285	30	15	0	15
CX11285	31	9	0	9
CX11285	32	14	0	14
CX11285	33	18	0	18
CX11285	34	13	0	13
CX11285	35	18	0	18
CX11285	36	14	0	14
CX11285	37	14	0	14
CX11285	38	14	0	14
CX11285	39	11	0	11
CX11285	40	19	0	19
CX11292	1	16	0	16
CX11292	2	14	0	14
CX11292	3	20	0	20
CX11292	4	20	0	20
CX11292	5	12	0	12
CX11292	6	10	0	10
CX11292	7	12	0	12
CX11292	8	20	0	20
CX11292	9	15	0	15
CX11292	10	16	0	16
CX11292	11	11	0	11
CX11292	12	21	0	21
CX11292	13	17	0	17
CX11292	14	18	0	18
CX11292	15	16	0	16
CX11292	16	10	0	10
CX11292	17	15	0	15
CX11292	18	8	0	8
CX11292	19	16	0	16
CX11292	20	13	0	13
CX11292	21	11	0	11
CX11292	22	16	0	16
CX11292	23	15	0	15
CX11292	24	16	0	16
CX11292	25	11	0	11
CX11292	26	17	0	17
CX11292	27	24	0	24
CX11292	28	15	0	15
CX11292	29	22	0	22
CX11292	30	16	0	16
CX11292	31	19	0	19
CX11292	32	15	0	15
CX11292	33	21	0	21
CX11292	34	17	0	17
CX11292	35	17	0	17
CX11292	36	12	0	12
CX11292	37	20	0	20
CX11292	38	9	0	9
CX11292	39	16	0	16
CX11292	40	19	0	19
CX11307	1	16	0	16
CX11307	2	4	0	4
CX11307	3	12	0	12
CX11307	4	13	0	13
CX11307	5	22	0	22
CX11307	6	16	0	16
CX11307	7	8	0	8
CX11307	8	16	0	16
CX11307	9	15	0	15
CX11307	10	25	0	25
CX11307	11	17	0	17
CX11307	12	16	0	16
CX11307	13	25	0	25
CX11307	14	19	0	19
CX11307	15	8	0	8
CX11307	16	6	0	6
CX11307	17	20	0	20
CX11307	18	13	0	13
CX11307	19	16	0	16
CX11307	20	13	0	13
CX11307	21	9	0	9
CX11307	22	27	0	27
CX11307	23	23	0	23
CX11307	24	22	0	22
CX11307	25	18	0	18
CX11307	26	17	0	17
CX11307	27	26	0	26
CX11307	28	24	0	24
CX11307	29	17	0	17
CX11307	30	13	0	13
CX11307	31	24	0	24
CX11307	32	28	0	28
CX11307	33	12	0	12
CX11307	34	30	0	30
CX11307	35	26	0	26
CX11307	36	16	0	16
CX11307	37	26	0	26
CX11307	38	17	0	17
CX11307	39	14	0	14
CX11307	40	16	0	16
CX11314	1	8	0	8
CX11314	2	6	0	6
CX11314	3	11	0	11
CX11314	4	7	0	7
CX11314	5	5	0	5
CX11314	6	10	0	10
CX11314	7	8	0	8
CX11314	8	10	0	10
CX11314	9	7	0	7
CX11314	10	6	0	6
CX11314	11	17	0	17
CX11314	12	15	0	15
CX11314	13	16	0	16
CX11314	14	16	0	16
CX11314	15	17	0	17
CX11314	16	6	0	6
CX11314	17	7	0	7
CX11314	18	9	0	9
CX11314	19	13	0	13
CX11314	20	15	0	15
CX11314	21	8	0	8
CX11314	22	13	0	13
CX11314	23	3	0	3
CX11314	24	7	0	7
CX11314	25	4	0	4
CX11314	26	9	0	9
CX11314	27	7	0	7
CX11314	28	8	0	8
CX11314	29	10	0	10
CX11314	30	11	0	11
CX11314	31	11	0	11
CX11314	32	8	0	8
CX11314	33	7	0	7
CX11314	34	6	0	6
CX11314	35	10	0	10
CX11314	36	11	0	11
CX11314	37	6	0	6
CX11314	38	12	0	12
CX11314	39	7	0	7
CX11314	40	8	0	8
CX11315	1	8	0	8
CX11315	1	20	0	20
CX11315	2	7	0	7
CX11315	2	5	0	5
CX11315	3	16	0	16
CX11315	3	9	0	9
CX11315	4	11	0	11
CX11315	4	8	0	8
CX11315	5	5	0	5
CX11315	5	8	0	8
CX11315	6	8	0	8
CX11315	6	10	0	10
CX11315	7	11	0	11
CX11315	7	16	0	16
CX11315	8	11	0	11
CX11315	8	12	0	12
CX11315	9	6	0	6
CX11315	9	12	0	12
CX11315	10	9	0	9
CX11315	10	25	0	25
CX11315	11	10	0	10
CX11315	11	10	0	10
CX11315	12	9	0	9
CX11315	12	11	0	11
CX11315	13	7	0	7
CX11315	13	6	0	6
CX11315	14	6	0	6
CX11315	14	16	0	16
CX11315	15	7	0	7
CX11315	15	7	0	7
CX11315	16	9	0	9
CX11315	16	11	0	11
CX11315	17	10	0	10
CX11315	17	11	0	11
CX11315	18	8	0	8
CX11315	18	14	0	14
CX11315	19	12	0	12
CX11315	19	10	0	10
CX11315	20	7	0	7
CX11315	20	11	0	11
CX11315	21	20	0	20
CX11315	21	14	0	14
CX11315	22	9	0	9
CX11315	22	5	0	5
CX11315	23	13	0	13
CX11315	23	11	0	11
CX11315	24	9	0	9
CX11315	24	18	0	18
CX11315	25	16	0	16
CX11315	25	10	0	10
CX11315	26	14	0	14
CX11315	26	10	0	10
CX11315	27	10	0	10
CX11315	27	14	0	14
CX11315	28	11	0	11
CX11315	28	20	0	20
CX11315	29	12	0	12
CX11315	29	8	0	8
CX11315	30	14	0	14
CX11315	30	11	0	11
CX11315	31	23	0	23
CX11315	31	11	0	11
CX11315	32	10	0	10
CX11315	32	13	0	13
CX11315	33	17	0	17
CX11315	33	10	0	10
CX11315	34	11	0	11
CX11315	34	14	0	14
CX11315	35	13	0	13
CX11315	35	15	0	15
CX11315	36	16	0	16
CX11315	36	14	0	14
CX11315	37	20	0	20
CX11315	37	12	0	12
CX11315	38	22	0	22
CX11315	38	17	0	17
CX11315	39	16	0	16
CX11315	39	9	0	9
CX11315	40	18	0	18
CX11315	40	15	0	15
DL200	1	4	0	4
DL200	1	12	0	12
DL200	2	15	0	15
DL200	2	5	0	5
DL200	3	30	0	30
DL200	3	11	0	11
DL200	4	24	0	24
DL200	4	13	0	13
DL200	5	24	0	24
DL200	5	16	0	16
DL200	6	25	0	25
DL200	6	26	0	26
DL200	7	25	0	25
DL200	7	4	0	4
DL200	8	15	0	15
DL200	8	26	0	26
DL200	9	26	0	26
DL200	9	19	0	19
DL200	10	28	0	28
DL200	10	17	0	17
DL200	11	23	0	23
DL200	11	20	0	20
DL200	12	28	0	28
DL200	12	14	0	14
DL200	13	26	0	26
DL200	13	15	0	15
DL200	14	30	0	30
DL200	14	15	0	15
DL200	15	22	0	22
DL200	15	6	0	6
DL200	16	28	0	28
DL200	16	23	0	23
DL200	17	7	0	7
DL200	17	27	0	27
DL200	18	20	0	20
DL200	18	22	0	22
DL200	19	23	0	23
DL200	19	21	0	21
DL200	20	22	0	22
DL200	20	18	0	18
DL200	21	29	0	29
DL200	21	20	0	20
DL200	22	42	0	42
DL200	22	24	0	24
DL200	23	26	0	26
DL200	23	26	0	26
DL200	24	25	0	25
DL200	24	22	0	22
DL200	25	20	0	20
DL200	25	30	0	30
DL200	26	26	0	26
DL200	26	24	0	24
DL200	27	33	0	33
DL200	27	17	0	17
DL200	28	23	0	23
DL200	28	28	0	28
DL200	29	40	0	40
DL200	29	25	0	25
DL200	30	26	0	26
DL200	30	17	0	17
DL200	31	33	0	33
DL200	31	29	0	29
DL200	32	29	0	29
DL200	32	22	0	22
DL200	33	26	0	26
DL200	33	23	0	23
DL200	34	21	0	21
DL200	34	18	0	18
DL200	35	43	0	43
DL200	35	21	0	21
DL200	36	22	0	22
DL200	36	20	0	20
DL200	37	20	0	20
DL200	37	26	0	26
DL200	38	23	0	23
DL200	38	30	0	30
DL200	39	28	0	28
DL200	39	21	0	21
DL200	40	25	0	25
DL200	40	14	0	14
DL226	1	10	0	10
DL226	2	22	0	22
DL226	3	25	0	25
DL226	4	5	0	5
DL226	5	35	0	35
DL226	6	25	0	25
DL226	7	14	0	14
DL226	8	24	0	24
DL226	9	14	0	14
DL226	10	26	0	26
DL226	11	14	0	14
DL226	12	13	0	13
DL226	13	19	0	19
DL226	14	11	0	11
DL226	15	18	0	18
DL226	16	28	0	28
DL226	17	18	0	18
DL226	18	8	0	8
DL226	19	21	0	21
DL226	20	22	0	22
DL226	21	29	0	29
DL226	22	21	0	21
DL226	23	18	0	18
DL226	24	28	0	28
DL226	25	19	0	19
DL226	26	26	0	26
DL226	27	23	0	23
DL226	28	12	0	12
DL226	29	31	0	31
DL226	30	11	0	11
DL226	31	17	0	17
DL226	32	21	0	21
DL226	33	13	0	13
DL226	34	26	0	26
DL226	35	30	0	30
DL226	36	15	0	15
DL226	37	22	0	22
DL226	38	28	0	28
DL226	39	16	0	16
DL226	40	24	0	24
DL238	1	22	0	22
DL238	2	15	0	15
DL238	3	14	0	14
DL238	4	8	0	8
DL238	5	12	0	12
DL238	6	14	0	14
DL238	7	17	0	17
DL238	8	15	0	15
DL238	9	16	0	16
DL238	10	13	0	13
DL238	11	17	0	17
DL238	12	14	0	14
DL238	13	6	0	6
DL238	14	6	0	6
DL238	15	23	0	23
DL238	16	17	0	17
DL238	17	12	0	12
DL238	18	19	0	19
DL238	19	20	0	20
DL238	20	23	0	23
DL238	21	10	0	10
DL238	22	16	0	16
DL238	23	13	0	13
DL238	24	12	0	12
DL238	25	10	0	10
DL238	26	15	0	15
DL238	27	18	0	18
DL238	28	10	0	10
DL238	29	13	0	13
DL238	30	6	0	6
DL238	31	10	0	10
DL238	32	9	0	9
DL238	33	6	0	6
DL238	34	18	0	18
DL238	35	19	0	19
DL238	36	6	0	6
DL238	37	11	0	11
DL238	38	17	0	17
DL238	39	13	0	13
DL238	40	10	0	10
ECA189	1	4	0	4
ECA189	1	15	0	15
ECA189	2	9	0	9
ECA189	2	13	0	13
ECA189	3	10	0	10
ECA189	3	7	0	7
ECA189	4	18	0	18
ECA189	4	5	0	5
ECA189	5	19	0	19
ECA189	5	16	0	16
ECA189	6	10	0	10
ECA189	6	11	0	11
ECA189	7	14	0	14
ECA189	7	20	0	20
ECA189	8	9	0	9
ECA189	8	13	0	13
ECA189	9	17	0	17
ECA189	9	17	0	17
ECA189	10	14	0	14
ECA189	10	11	0	11
ECA189	11	11	0	11
ECA189	11	13	0	13
ECA189	12	11	0	11
ECA189	12	7	0	7
ECA189	13	16	0	16
ECA189	13	9	0	9
ECA189	14	12	0	12
ECA189	14	11	0	11
ECA189	15	7	0	7
ECA189	15	10	0	10
ECA189	16	12	0	12
ECA189	16	10	0	10
ECA189	17	15	0	15
ECA189	17	6	0	6
ECA189	18	11	0	11
ECA189	18	17	0	17
ECA189	19	13	0	13
ECA189	19	16	0	16
ECA189	20	8	0	8
ECA189	20	9	0	9
ECA189	21	16	0	16
ECA189	21	14	0	14
ECA189	22	5	0	5
ECA189	22	5	0	5
ECA189	23	15	0	15
ECA189	23	22	0	22
ECA189	24	15	0	15
ECA189	24	6	0	6
ECA189	25	14	0	14
ECA189	25	7	0	7
ECA189	26	15	0	15
ECA189	26	8	0	8
ECA189	27	11	0	11
ECA189	27	19	0	19
ECA189	28	14	0	14
ECA189	28	13	0	13
ECA189	29	15	0	15
ECA189	29	14	0	14
ECA189	30	16	0	16
ECA189	30	19	0	19
ECA189	31	17	0	17
ECA189	32	14	0	14
ECA189	33	13	0	13
ECA189	34	26	0	26
ECA189	35	13	0	13
ECA189	36	24	0	24
ECA189	37	22	0	22
ECA189	38	10	0	10
ECA189	39	18	0	18
ECA189	40	17	0	17
ECA191	1	10	0	10
ECA191	1	14	0	14
ECA191	2	14	0	14
ECA191	2	8	0	8
ECA191	3	10	0	10
ECA191	3	14	0	14
ECA191	4	9	0	9
ECA191	4	11	0	11
ECA191	5	11	0	11
ECA191	5	10	0	10
ECA191	6	8	0	8
ECA191	6	16	0	16
ECA191	7	8	0	8
ECA191	7	8	0	8
ECA191	8	10	0	10
ECA191	8	9	0	9
ECA191	9	8	0	8
ECA191	9	6	0	6
ECA191	10	11	0	11
ECA191	10	12	0	12
ECA191	11	8	0	8
ECA191	11	8	0	8
ECA191	12	10	0	10
ECA191	12	12	0	12
ECA191	13	13	0	13
ECA191	13	9	0	9
ECA191	14	7	0	7
ECA191	14	8	0	8
ECA191	15	4	0	4
ECA191	15	13	0	13
ECA191	16	10	0	10
ECA191	16	9	0	9
ECA191	17	5	0	5
ECA191	17	9	0	9
ECA191	18	7	0	7
ECA191	18	11	0	11
ECA191	19	15	0	15
ECA191	19	12	0	12
ECA191	20	13	0	13
ECA191	20	8	0	8
ECA191	21	5	0	5
ECA191	21	15	0	15
ECA191	22	14	0	14
ECA191	22	6	0	6
ECA191	23	11	0	11
ECA191	23	12	0	12
ECA191	24	9	0	9
ECA191	24	18	0	18
ECA191	25	7	0	7
ECA191	25	15	0	15
ECA191	26	9	0	9
ECA191	26	12	0	12
ECA191	27	16	0	16
ECA191	27	13	0	13
ECA191	28	8	0	8
ECA191	28
ECA191	29	18	0	18
ECA191	29
ECA191	30	13	0	13
ECA191	30
ECA191	31	7	0	7
ECA191	32	10	0	10
ECA191	33	17	0	17
ECA191	34	11	0	11
ECA191	35	8	0	8
ECA191	36	12	0	12
ECA191	37	11	0	11
ECA191	38	8	0	8
ECA191	39	8	0	8
ECA191	40	14	0	14
ECA347	1	15		15
ECA347	2	25		25
ECA347	3	20		20
ECA347	4	15		15
ECA347	5	15		15
ECA347	6	10		10
ECA347	7	8		8
ECA347	8	10		10
ECA347	9	9		9
ECA347	10	10		10
ECA347	11	10		10
ECA347	12	17		17
ECA347	13	15		15
ECA347	14	23		23
ECA347	15	17		17
ECA347	16	26		26
ECA347	17	11		11
ECA347	18	19		19
ECA347	19	16		16
ECA347	20	10		10
ECA347	21	16		16
ECA347	22	19		19
ECA347	23	20		20
ECA347	24	10		10
ECA347	25	10		10
ECA347	26	8		8
ECA347	27	8		8
ECA347	28	10		10
ECA347	29	6		6
ECA347	30	8		8
ECA348	1	9	0	9
ECA348	2	12	0	12
ECA348	3	9	0	9
ECA348	4	12	0	12
ECA348	5	10	0	10
ECA348	6	9	0	9
ECA348	7	12	0	12
ECA348	8	12	0	12
ECA348	9	13	0	13
ECA348	10	12	0	12
ECA348	11	10	0	10
ECA348	12	8	0	8
ECA348	13	11	0	11
ECA348	14	11	0	11
ECA348	15	13	0	13
ECA348	16	12	0	12
ECA348	17	17	0	17
ECA348	18	10	0	10
ECA348	19	14	0	14
ECA348	20	12	0	12
ECA349	1	6	0	6
ECA349	2	8	0	8
ECA349	3	6	0	6
ECA349	4	8	0	8
ECA349	5	6	0	6
ECA349	6	8	0	8
ECA349	7	10	0	10
ECA349	8	6	0	6
ECA349	9	6	0	6
ECA349	10	8	0	8
ECA349	11	12	0	12
ECA349	12	11	0	11
ECA349	13	5	0	5
ECA349	14	9	0	9
ECA349	15	8	0	8
ECA349	16	9	0	9
ECA349	17	6	0	6
ECA349	18	9	0	9
ECA349	19	6	0	6
ECA349	20	8	0	8
ECA36	1	10	0	10
ECA36	2	18	0	18
ECA36	3	5	0	5
ECA36	4	12	0	12
ECA36	5	17	0	17
ECA36	6	8	0	8
ECA36	7	10	0	10
ECA36	8	10	0	10
ECA36	9	9	0	9
ECA36	10	8	0	8
ECA36	11	14	0	14
ECA36	12	9	0	9
ECA36	13	6	0	6
ECA36	14	17	0	17
ECA36	15	9	0	9
ECA36	16	8	0	8
ECA36	17	9	0	9
ECA36	18	13	0	13
ECA36	19	8	0	8
ECA36	20	19	0	19
ECA36	21	5	0	5
ECA36	22	7	0	7
ECA36	23	10	0	10
ECA36	24	9	0	9
ECA36	25	9	0	9
ECA36	26	3	0	3
ECA36	27	6	0	6
ECA36	28	11	0	11
ECA36	29	3	0	3
ECA36	30	10	0	10
ECA36	31	8	0	8
ECA36	32	9	0	9
ECA36	33	12	0	12
ECA36	34	13	0	13
ECA36	35	11	0	11
ECA36	36	16	0	16
ECA36	37	10	0	10
ECA36	38	15	0	15
ECA36	39	14	0	14
ECA36	40	11	0	11
ECA363	1	5	0	5
ECA363	1	7	0	7
ECA363	2	5	0	5
ECA363	2	12	0	12
ECA363	3	9	0	9
ECA363	3	13	0	13
ECA363	4	4	0	4
ECA363	4	10	0	10
ECA363	5	6	0	6
ECA363	5	10	0	10
ECA363	6	7	0	7
ECA363	6	11	0	11
ECA363	7	9	0	9
ECA363	7	10	0	10
ECA363	8	5	0	5
ECA363	8	13	0	13
ECA363	9	12	0	12
ECA363	9	10	0	10
ECA363	10	5	0	5
ECA363	10	8	0	8
ECA363	11	5	0	5
ECA363	11	8	0	8
ECA363	12	9	0	9
ECA363	12	7	0	7
ECA363	13	7	0	7
ECA363	13	3	0	3
ECA363	14	8	0	8
ECA363	14	15	0	15
ECA363	15	8	0	8
ECA363	15	11	0	11
ECA363	16	16	0	16
ECA363	16	10	0	10
ECA363	17	10	0	10
ECA363	17	10	0	10
ECA363	18	11	0	11
ECA363	18	10	0	10
ECA363	19	7	0	7
ECA363	19	12	0	12
ECA363	20	8	0	8
ECA363	20	12	0	12
ECA363	21	0	0	0
ECA363	21	13	0	13
ECA363	22	6	0	6
ECA363	22	8	0	8
ECA363	23	1	0	1
ECA363	23	9	0	9
ECA363	24	10	0	10
ECA363	24	7	0	7
ECA363	25	7	0	7
ECA363	25	16	0	16
ECA363	26	8	0	8
ECA363	26	9	0	9
ECA363	27	0	0	0
ECA363	27	8	0	8
ECA363	28	6	0	6
ECA363	28	11	0	11
ECA363	29	5	0	5
ECA363	29	6	0	6
ECA363	30	7	0	7
ECA363	30	9	0	9
ECA363	31	13	0	13
ECA363	32	12	0	12
ECA363	33	1	0	1
ECA363	34	4	0	4
ECA363	35	9	0	9
ECA363	36	4	0	4
ECA363	37	8	0	8
ECA363	38	2	0	2
ECA363	39	6	0	6
ECA363	40	10	0	10
ECA369	1	5	0	5
ECA369	1	20	0	20
ECA369	2	18	0	18
ECA369	2	21	0	21
ECA369	3	11	0	11
ECA369	3	28	0	28
ECA369	4	21	0	21
ECA369	4	18	0	18
ECA369	5	8	0	8
ECA369	5	19	0	19
ECA369	6	8	0	8
ECA369	6	25	0	25
ECA369	7	4	0	4
ECA369	7	19	0	19
ECA369	8	14	0	14
ECA369	8	23	0	23
ECA369	9	12	0	12
ECA369	9	26	0	26
ECA369	10	11	0	11
ECA369	10	14	0	14
ECA369	11	7	0	7
ECA369	11	22	0	22
ECA369	12	14	0	14
ECA369	12	10	0	10
ECA369	13	20	0	20
ECA369	13	30	0	30
ECA369	14	17	0	17
ECA369	14	10	0	10
ECA369	15	17	0	17
ECA369	15	15	0	15
ECA369	16	4	0	4
ECA369	16	18	0	18
ECA369	17	21	0	21
ECA369	17	22	0	22
ECA369	18	10	0	10
ECA369	18	25	0	25
ECA369	19	20	0	20
ECA369	19	20	0	20
ECA369	20	11	0	11
ECA369	20	25	0	25
ECA369	21	26	0	26
ECA369	21	23	0	23
ECA369	22	20	0	20
ECA369	22	22	0	22
ECA369	23	22	0	22
ECA369	23	20	0	20
ECA369	24	16	0	16
ECA369	24	43	0	43
ECA369	25	19	0	19
ECA369	25	20	0	20
ECA369	26	9	0	9
ECA369	26	19	0	19
ECA369	27	13	0	13
ECA369	27	17	0	17
ECA369	28	13	0	13
ECA369	28	24	0	24
ECA369	29	20	0	20
ECA369	29	24	0	24
ECA369	30	14	0	14
ECA369	30	37	0	37
ECA369	31	20	0	20
ECA369	32	20	0	20
ECA369	33	22	0	22
ECA369	34	20	0	20
ECA369	35	13	0	13
ECA369	36	16	0	16
ECA369	37	14	0	14
ECA369	38	12	0	12
ECA369	39	11	0	11
ECA369	40	24	0	24
ECA372	1	13	0	13
ECA372	1	16	0	16
ECA372	2	8	0	8
ECA372	2	16	0	16
ECA372	3	14	0	14
ECA372	3	35	0	35
ECA372	4	6	0	6
ECA372	4	36	0	36
ECA372	5	9	0	9
ECA372	5	28	0	28
ECA372	6	12	0	12
ECA372	6	22	0	22
ECA372	7	24	0	24
ECA372	7	32	0	32
ECA372	8	10	0	10
ECA372	8	23	0	23
ECA372	9	10	0	10
ECA372	9	18	0	18
ECA372	10	25	0	25
ECA372	10	21	0	21
ECA372	11	17	0	17
ECA372	11	25	0	25
ECA372	12	14	0	14
ECA372	12	22	0	22
ECA372	13	13	0	13
ECA372	13	23	0	23
ECA372	14	14	0	14
ECA372	14	21	0	21
ECA372	15	20	0	20
ECA372	15	26	0	26
ECA372	16	15	0	15
ECA372	16	21	0	21
ECA372	17	10	0	10
ECA372	17	28	0	28
ECA372	18	8	0	8
ECA372	18	27	0	27
ECA372	19	20	0	20
ECA372	19	14	0	14
ECA372	20	14	0	14
ECA372	20	16	0	16
ECA372	21	26	0	26
ECA372	21	32	0	32
ECA372	22	8	0	8
ECA372	22	20	0	20
ECA372	23	26	0	26
ECA372	23	25	0	25
ECA372	24	3	2	5
ECA372	24	18	0	18
ECA372	25	19	0	19
ECA372	25	20	0	20
ECA372	26	15	0	15
ECA372	26	19	0	19
ECA372	27	24	0	24
ECA372	27	21	0	21
ECA372	28	28	0	28
ECA372	28	16	0	16
ECA372	29	22	0	22
ECA372	29	20	0	20
ECA372	30	18	0	18
ECA372	30	22	0	22
ECA372	31	14	0	14
ECA372	32	18	0	18
ECA372	33	22	0	22
ECA372	34	11	0	11
ECA372	35	19	0	19
ECA372	36	26	0	26
ECA372	37	24	0	24
ECA372	38	19	0	19
ECA372	39	10	0	10
ECA372	40	29	1	30
ECA396	1	10	0	10
ECA396	1	15	0	15
ECA396	2	8	0	8
ECA396	2	10	0	10
ECA396	3	11	0	11
ECA396	3	10	0	10
ECA396	4	15	0	15
ECA396	4	10	0	10
ECA396	5	7	0	7
ECA396	5	11	0	11
ECA396	6	12	0	12
ECA396	6	11	0	11
ECA396	7	8	0	8
ECA396	7	15	0	15
ECA396	8	6	0	6
ECA396	8	13	0	13
ECA396	9	17	0	17
ECA396	9	15	0	15
ECA396	10	16	0	16
ECA396	10	14	0	14
ECA396	11	9	0	9
ECA396	11	13	0	13
ECA396	12	11	0	11
ECA396	12	11	0	11
ECA396	13	8	0	8
ECA396	13	12	0	12
ECA396	14	10	0	10
ECA396	14	7	0	7
ECA396	15	8	0	8
ECA396	15	12	0	12
ECA396	16	9	0	9
ECA396	16	11	0	11
ECA396	17	8	0	8
ECA396	17	10	0	10
ECA396	18	12	0	12
ECA396	18	13	0	13
ECA396	19	7	0	7
ECA396	19	12	0	12
ECA396	20	8	0	8
ECA396	20	18	0	18
ECA396	21	14	0	14
ECA396	21	11	0	11
ECA396	22	5	0	5
ECA396	22	19	0	19
ECA396	23	4	0	4
ECA396	23	12	0	12
ECA396	24	4	0	4
ECA396	24	12	0	12
ECA396	25	3	0	3
ECA396	25	7	0	7
ECA396	26	10	0	10
ECA396	26	8	0	8
ECA396	27	2	0	2
ECA396	27	6	0	6
ECA396	28	5	0	5
ECA396	28	6	0	6
ECA396	29	7	0	7
ECA396	29	4	0	4
ECA396	30	8	0	8
ECA396	30	3	0	3
ECA396	31	7	0	7
ECA396	32	8	0	8
ECA396	33	13	0	13
ECA396	34	4	0	4
ECA396	35	4	0	4
ECA396	36	12	0	12
ECA396	37	9	0	9
ECA396	38	9	0	9
ECA396	39	8	0	8
ECA396	40	11	0	11
ECA592	1	20		20
ECA592	2	16		16
ECA592	3	7		7
ECA592	4	21		21
ECA592	5	18		18
ECA592	6	8		8
ECA592	7	27		27
ECA592	8	24		24
ECA592	9	18		18
ECA592	10	12		12
ECA592	11	22		22
ECA592	12	20		20
ECA592	13	10		10
ECA592	14	8		8
ECA592	15	11		11
ECA592	16	18		18
ECA592	17	12		12
ECA592	18	23		23
ECA592	19	21		21
ECA592	20	16		16
ECA592	21	15		15
ECA592	22	13		13
ECA592	23	16		16
ECA592	24	6		6
ECA592	25	9		9
ECA592	26	11		11
ECA592	27	8		8
ECA592	28	5		5
ECA592	29	11		11
ECA592	30	10		10
ECA593	1	14		14
ECA593	2	16		16
ECA593	3	12		12
ECA593	4	13		13
ECA593	5	17		17
ECA593	6	16		16
ECA593	7	6		6
ECA593	8	13		13
ECA593	9	11		11
ECA593	10	13		13
ECA593	11	16		16
ECA593	12	32		32
ECA593	13	3		3
ECA593	14	8		8
ECA593	15	16		16
ECA593	16	17		17
ECA593	17	25		25
ECA593	18	13		13
ECA593	19	20		20
ECA593	20	9		9
ECA593	21	16		16
ECA593	22	10		10
ECA593	23	14		14
ECA593	24	16		16
ECA593	25	12		12
ECA593	26	14		14
ECA593	27	11		11
ECA593	28	13		13
ECA593	29	12		12
ECA593	30	15		15
ECA594	1	10		10
ECA594	2	9		9
ECA594	3	14		14
ECA594	4	7		7
ECA594	5	4		4
ECA594	6	11		11
ECA594	7	8		8
ECA594	8	16		16
ECA594	9	11		11
ECA594	10	23		23
ECA594	11	21		21
ECA594	12	9		9
ECA594	13	27		27
ECA594	14	17		17
ECA594	15	21		21
ECA594	16	17		17
ECA594	17	10		10
ECA594	18	13		13
ECA594	19	17		17
ECA594	20	20		20
ECA594	21	28		28
ECA594	22	22		22
ECA594	23	6		6
ECA594	24	21		21
ECA594	25	24		24
ECA594	26	19		19
ECA594	27	17		17
ECA594	28	22		22
ECA594	29	16		16
ECA594	30	19		19
ECA640	1	8		8
ECA640	2	10		10
ECA640	3	11		11
ECA640	4	16		16
ECA640	5	4		4
ECA640	6	10		10
ECA640	7	7		7
ECA640	8	6		6
ECA640	9	17		17
ECA640	10	10		10
ECA640	11	4		4
ECA640	12	16		16
ECA640	13	13		13
ECA640	14	18		18
ECA640	15	11		11
ECA640	16	8		8
ECA640	17	7		7
ECA640	18	9		9
ECA640	19	13		13
ECA640	20	10		10
ECA640	21	10		10
ECA640	22	11		11
ECA640	23	13		13
ECA640	24	15		15
ECA640	25	9		9
ECA640	26	8		8
ECA640	27	13		13
ECA640	28	7		7
ECA640	29	15		15
ECA640	30	11		11
ECA701	1	17	0	17
ECA701	2	12	0	12
ECA701	3	15	0	15
ECA701	4	11	0	11
ECA701	5	12	0	12
ECA701	6	11	0	11
ECA701	7	7	0	7
ECA701	8	12	0	12
ECA701	9	9	0	9
ECA701	10	12	0	12
ECA701	11	13	0	13
ECA701	12	12	0	12
ECA701	13	8	0	8
ECA701	14	12	0	12
ECA701	15	27	0	27
ECA701	16	10	0	10
ECA701	17	13	0	13
ECA701	18	7	0	7
ECA701	19	8	0	8
ECA701	20	12	0	12
ECA701	21	14	0	14
ECA701	22	10	0	10
ECA701	23	8	0	8
ECA701	24	17	0	17
ECA701	25	11	0	11
ECA701	26	11	0	11
ECA701	27	15	0	15
ECA701	28	13	0	13
ECA701	29	11	0	11
ECA701	30	10	0	10
ECA706	1	18		18
ECA706	2	15		15
ECA706	3	15		15
ECA706	4	17		17
ECA706	5	14		14
ECA706	6	8		8
ECA706	7	2		2
ECA706	8	12		12
ECA706	9	14		14
ECA706	10	11		11
ECA706	11	19		19
ECA706	12	11		11
ECA706	13	10		10
ECA706	14	16		16
ECA706	15	10		10
ECA706	16	15		15
ECA706	17	15		15
ECA706	18	12		12
ECA706	19	14		14
ECA706	20	14		14
ECA706	21	14		14
ECA706	22	17		17
ECA706	23	6		6
ECA706	24	19		19
ECA706	25	10		10
ECA706	26	10		10
ECA706	27	13		13
ECA706	28	9		9
ECA706	29	14		14
ECA706	30	16		16
ECA710	1	16	0	16
ECA710	2	17	0	17
ECA710	3	17	0	17
ECA710	4	5	0	5
ECA710	5	19	0	19
ECA710	6	17	0	17
ECA710	7	22	0	22
ECA710	8	25	0	25
ECA710	9	19	0	19
ECA710	10	19	0	19
ECA710	11	16	0	16
ECA710	12	19	0	19
ECA710	13	16	0	16
ECA710	14	11	0	11
ECA710	15	20	0	20
ECA710	16	16	0	16
ECA710	17	17	0	17
ECA710	18	25	0	25
ECA710	19	18	0	18
ECA710	20	18	0	18
ECA710	21	16	0	16
ECA710	22	16	0	16
ECA710	23	16	0	16
ECA710	24	15	0	15
ECA710	25	24	0	24
ECA710	26	16	0	16
ECA710	27	18	0	18
ECA710	28	15	0	15
ECA710	29	16	0	16
ECA710	30	17	0	17
ECA722	1	10		10
ECA722	2	10		10
ECA722	3	14		14
ECA722	4	12		12
ECA722	5	12		12
ECA722	6	12		12
ECA722	7	13		13
ECA722	8	11		11
ECA722	9	9		9
ECA722	10	13		13
ECA722	11	13		13
ECA722	12	16		16
ECA722	13	3		3
ECA722	14	10		10
ECA722	15	4		4
ECA722	16	12		12
ECA722	17	13		13
ECA722	18	11		11
ECA722	19	10		10
ECA722	20	9		9
ECA722	21	21		21
ECA722	22	12		12
ECA722	23	22		22
ECA722	24	8		8
ECA722	25	14		14
ECA722	26	8		8
ECA722	27	13		13
ECA722	28	8		8
ECA722	29	14		14
ECA722	30	17		17
ECA723	1	15		15
ECA723	2	17		17
ECA723	3	10		10
ECA723	4	8		8
ECA723	5	11		11
ECA723	6	13		13
ECA723	7	7		7
ECA723	8	9		9
ECA723	9	8		8
ECA723	10	6		6
ECA723	11	10		10
ECA723	12	9		9
ECA723	13	7		7
ECA723	14	12		12
ECA723	15	6		6
ECA723	16	7		7
ECA723	17	15		15
ECA723	18	11		11
ECA723	19	2		2
ECA723	20	8		8
ECA723	21	11		11
ECA723	22	12		12
ECA723	23	10		10
ECA723	24	12		12
ECA723	25	9		9
ECA723	26	9		9
ECA723	27	12		12
ECA723	28	10		10
ECA723	29	9		9
ECA723	30	12		12
ECA724	1	14		14
ECA724	2	19		19
ECA724	3	19		19
ECA724	4	19		19
ECA724	5	15		15
ECA724	6	22		22
ECA724	7	19		19
ECA724	8	26		26
ECA724	9	16		16
ECA724	10	16		16
ECA724	11	22		22
ECA724	12	18		18
ECA724	13	20		20
ECA724	14	20		20
ECA724	15	20		20
ECA724	16	14		14
ECA724	17	22		22
ECA724	18	23		23
ECA724	19	10		10
ECA724	20	19		19
ECA724	21	12		12
ECA724	22	16		16
ECA724	23	12		12
ECA724	24	7		7
ECA724	25	20		20
ECA724	26	12		12
ECA724	27	20		20
ECA724	28	30		30
ECA724	29	13		13
ECA724	30	24		24
ECA738	1	22		22
ECA738	2	28		28
ECA738	3	12		12
ECA738	4	19		19
ECA738	5	8		8
ECA738	6	9		9
ECA738	7	23		23
ECA738	8	19		19
ECA738	9	26		26
ECA738	10	22		22
ECA738	11	16		16
ECA738	12	16		16
ECA738	13	12		12
ECA738	14	11		11
ECA738	15	19		19
ECA738	16	7		7
ECA738	17	15		15
ECA738	18	9		9
ECA738	19	18		18
ECA738	20	17		17
ECA738	21	16		16
ECA738	22	3		3
ECA738	23	20		20
ECA738	24	15		15
ECA738	25	14		14
ECA738	26	11		11
ECA738	27	18		18
ECA738	28	23		23
ECA738	29	17		17
ECA738	30	15		15
ECA740	1	0		0
ECA740	2	7		7
ECA740	3	14		14
ECA740	4	4		4
ECA740	5	9		9
ECA740	6	5		5
ECA740	7	9		9
ECA740	8	9		9
ECA740	9	8		8
ECA740	10	16		16
ECA740	11	15		15
ECA740	12	11		11
ECA740	13	7		7
ECA740	14	10		10
ECA740	15	10		10
ECA740	16	12		12
ECA740	17	11		11
ECA740	18	6		6
ECA740	19	1		1
[truncated: 10,122 more rows]

## Sheet: Figure 1B
Class	Strain	Isotype	Mean number of eggs in utero	Latitude	Longitude
Class I	CB4852	CB4852	9.025	NA	NA
Class I	CB4853	NA	9.6875	34.1371	-118.125
Class I	CX11262	CX11262	9	34.1301	-118.115
Class I	CX11314	CX11314	9.375	34.1295	-118.11
Class I	ECA349	ECA349	7.75	32.7658	-117.237
Class I	ECA363	ECA363	8.18571	20.7233	-156.305
Class I	ECA396	ECA396	9.68571	19.4498	-155.235
Class I	ECA723	ECA723	9.9	19.4243	-155.222
Class I	ECA740	ECA740	8.06667	20.67	-156.339
Class I	EG4347	EG4347	8.30556	44.0479	-123.071
Class I	EG4946	EG4946	9.7	40.7073	-111.868
Class I	JU1586	JU1586	8.78049	46.63	1.06
Class I	JU2017	JU2017	9.95	37.7576	-122.463
Class I	JU2234	JU2234	8.85	47.227	-1.583
Class I	JU2610	JU2610	8.55	49.1075	1.7915
Class I	JU2619	JU2619	7.6	32.9984	-117.275
Class I	JU2838	JU2838	8.95	20.206	-97.9883
Class I	JU3132	JU3132	8.7	48.7015	2.1725
Class I	JU3166	JU3166	9.13333	0.28417	6.59837
Class I	JU774	JU774	9.975	38.683	-9.34
Class I	MY16	MY16	9.9	51.93	7.57
Class I	MY2212	MY2212	9.2	54.3464	10.1177
Class I	MY2535	MY2535	8.65	52.0065	-1.89739
Class I	MY2585	MY2585	7	54.3464	10.1177
Class I	MY2693	MY2693	8.45	54.3491	10.1151
Class I	MY920	MY920	8.2	37.994	23.7496
Class I	NIC1798	NIC1798	9.67123	28.4111	-16.5355
Class I	NIC1805	NIC1805	9.96296	28.4983	-16.3993
Class I	NIC1809	NIC1809	9.05405	28.4983	-16.3993
Class I	QG2075	QG2075	9.875	33.951	-83.376
Class I	QG2823	QG2823	9.16667	-34.4511	116.033
Class I	QG2832	QG2832	8.76667	-27.3311	152.764
Class I	QG2836	QG2836	6.9	-27.3308	152.759
Class I	QG2841	QG2841	8.03333	-28.2446	153.209
Class I	QG2843	QG2843	7.86667	-28.2402	153.195
Class I	QG2846	QG2846	9.5	-28.2043	153.191
Class I	QG2855	QG2855	5.96296	-28.0806	152.505
Class I	QG2857	QG2857	8.8	-28.0806	152.504
Class I	QG2873	QG2873	5.6	-27.369	152.183
Class I	QX1792	QX1792	9.7	20.7055	-156.355
Class I	QX1794	QX1794	8.3	20.7056	-156.357
Class I	RC301	RC301	9.7	54.3464	10.1177
Class I	WN2064	WN2064	8.46667	51.9747	5.68639
Class I	XZ1513	XZ1513	9.8	22.1479	-159.631
Class I	XZ1516	XZ1516	8.11765	22.149	-159.668
Class I	XZ1734	XZ1734	9.93333	-23.5	-46.7
Class II	AB1	AB1	12.525	-34.93	138.59
Class II	BRC20067	BRC20067	11.5	24.073	121.17
Class II	BRC20263	BRC20263	14	-33.8675	151.207
Class II	CB4851	NA	14.85	44.85	0.48
Class II	CB4854	CB4854	11.975	NA	NA
Class II	CB4856	CB4856	11.7237	21.33	-157.86
Class II	CB4857	NA	16.775	34.1371	-118.125
Class II	CB4858	NA	11.5	-34.93	138.59
Class II	CB4932	CB4932	17.025	51.02	-3.1
Class II	CX11254	CX11254	20.825	34.1301	-118.115
Class II	CX11264	CX11264	13.35	34.1301	-118.115
Class II	CX11271	CX11271	15.325	34.1371	-118.125
Class II	CX11285	CX11285	13.775	34.1433	-118.055
Class II	CX11292	CX11292	15.7	34.1353	-118.306
Class II	CX11307	CX11307	17.625	34.1295	-118.11
Class II	CX11315	CX11315	11.925	34.1301	-118.115
Class II	DL200	DL200	22.4	9.03	38.74
Class II	DL226	DL226	20.05	44.5633	-123.282
Class II	DL238	DL238	13.625	19.11	-155.81
Class II	ECA189	ECA189	13.0429	19.4239	-155.222
Class II	ECA191	ECA191	10.5224	19.4242	-155.222
Class II	ECA347	ECA347	13.8667	19.4389	-155.304
Class II	ECA348	ECA348	11.4	37.7753	-122.254
Class II	ECA36	ECA36	10.275	-36.8933	174.746
Class II	ECA369	ECA369	17.9429	21.1756	-157.006
Class II	ECA372	ECA372	19.1857	22.1217	-159.664
Class II	ECA592	ECA592	14.5333	34.4171	-119.641
Class II	ECA593	ECA593	14.1	34.4186	-119.642
Class II	ECA594	ECA594	15.9667	34.4175	-119.641
Class II	ECA640	ECA640	10.6667	34.0654	-118.441
Class II	ECA701	ECA701	12	22.1233	-159.656
Class II	ECA706	ECA706	13	20.0388	-155.439
Class II	ECA710	ECA710	17.3667	20.0397	-155.438
Class II	ECA722	ECA722	11.8	19.424	-155.223
Class II	ECA724	ECA724	17.9667	19.4388	-155.304
Class II	ECA738	ECA738	16	21.1393	-156.974
Class II	ECA741	ECA741	11.5	20.6702	-156.336
Class II	ECA742	ECA742	10.0667	20.8057	-156.278
Class II	ECA743	ECA743	21.7	20.7419	-156.323
Class II	ECA744	ECA744	13.8333	19.7188	-155.949
Class II	ECA745	ECA745	22.2	19.7005	-155.956
Class II	ECA746	ECA746	17.1	19.1153	-155.819
Class II	ECA923	ECA923	15.6333	21.2901	-157.708
Class II	ECA928	ECA928	14.3	21.2901	-157.708
Class II	ECA930	ECA930	12.6667	31.7784	35.1979
Class II	ED3011	ED3011	21.1	55.92	-3.19
Class II	ED3012	ED3012	12.675	55.92	-3.19
Class II	ED3017	ED3017	12.3	55.92	-3.19
Class II	ED3040	ED3040	17.5	-26.1667	28.0167
Class II	ED3046	ED3046	17.15	-33.3667	19.3167
Class II	ED3048	ED3048	14.575	-33.3667	19.3167
Class II	ED3049	ED3049	18.5	-33.3667	19.3167
Class II	ED3052	ED3052	13.775	-33.3667	19.3167
Class II	ED3073	ED3073	13.9	-1.05	36.39
Class II	ED3077	ED3077	15.525	-1.31667	36.8
Class II	EG4349	EG4349	13.25	40.7717	-111.873
Class II	EG4724	EG4724	11.35	41.6288	-8.3476
Class II	EG4725	EG4725	15.6	41.6288	-8.3476
Class II	GXW1	GXW1	12.85	30.5429	114.42
Class II	JT11398	JT11398	20.0625	47.7639	-122.275
Class II	JU1088	JU1088	10.075	34.7613	138.015
Class II	JU1172	JU1172	11.4	-36.87	-73.04
Class II	JU1200	JU1200	20.8769	55.577	-4.6
Class II	JU1212	JU1212	10.325	48.71	-3.81
Class II	JU1213	JU1213	17.9	48.71	-3.81
Class II	JU1242	JU1242	20.875	49.1269	1.9595
Class II	JU1246	JU1246	16.425	49.1262	1.96152
Class II	JU1249	JU1249	22.95	49.126	1.951
Class II	JU1395	JU1395	14.725	47.2199	0.04619
Class II	JU1400	JU1400	10.25	37.3845	-5.988
Class II	JU1409	JU1409	14.425	37.4721	-5.6331
Class II	JU1440	JU1440	10.575	41.4131	2.15231
Class II	JU1491	JU1491	16.925	46.63	1.06
Class II	JU1530	JU1530	10.85	48.7015	2.1725
Class II	JU1543	JU1543	16.45	48.7015	2.1725
Class II	JU1568	JU1568	12.3	48.8092	2.3862
Class II	JU1581	JU1581	14.175	48.7015	2.1725
Class II	JU1666	JU1666	15.7571	48.7049	-3.7941
Class II	JU1792	JU1792	19.35	46.6328	1.06429
Class II	JU1793	JU1793	13	48.7015	2.1725
Class II	JU1808	JU1808	15.4	48.8126	2.39537
Class II	JU1896	JU1896	12.1071	37.9997	23.7497
Class II	JU1934	JU1934	10.925	49.126	1.95114
Class II	JU2001	JU2001	16.175	-21.1	55.5
Class II	JU2007	JU2007	11.95	50.7608	-1.32413
Class II	JU2016	JU2016	10.5	37.7576	-122.463
Class II	JU2106	JU2106	11.4737	43.06	0.24
Class II	JU2131	JU2131	19.3	48.0497	-4.705
Class II	JU2141	JU2141	17.3	46.6293	1.0512
Class II	JU2250	JU2250	11.7	48.2853	-1.89139
Class II	JU2257	JU2257	17.3	46.6	1.1
Class II	JU2316	JU2316	24.05	38.7175	-9.1486
Class II	JU2464	JU2464	13.95	-13.155	-72.525
Class II	JU2466	JU2466	12.95	-13.257	-72.266
Class II	JU2478	JU2478	11.85	50.85	4.351
Class II	JU2513	JU2513	15.275	38.2602	22.0736
Class II	JU2519	JU2519	17.175	38.7175	-9.1486
Class II	JU2522	JU2522	13.15	38.7175	-9.1486
Class II	JU2526	JU2526	10.525	38.7175	-9.1486
Class II	JU2534	JU2534	12.3	49.3579	0.097087
Class II	JU2565	JU2565	21.2	44.9584	1.06621
Class II	JU2570	JU2570	12.2632	46.2657	-0.2685
Class II	JU2572	JU2572	10.9	48.8126	2.39537
Class II	JU2575	JU2575	15.15	49.0857	3.0707
Class II	JU2576	JU2576	12.4	49.0861	3.072
Class II	JU258	JU258	19.9667	32.73	-16.89
Class II	JU2581	JU2581	17.825	46.6	1.1
Class II	JU2586	JU2586	10.4	48.897	2.159
Class II	JU2592	JU2592	12.4737	48.6286	-2.40384
Class II	JU2600	JU2600	10.45	49.126	1.95114
Class II	JU2800	JU2800	16.35	48.79	2.331
Class II	JU2811	JU2811	14.85	-33.8632	151.219
Class II	JU2825	JU2825	12.85	48.8092	2.3862
Class II	JU2841	JU2841	11.65	-40	176
Class II	JU2853	JU2853	16.15	41.19	-7.545
Class II	JU2862	JU2862	10.7	52.1944	0.1264
Class II	JU2878	JU2878	11.45	19.2973	-99.0988
Class II	JU2879	JU2879	10.275	19.2973	-99.0988
Class II	JU2906	JU2906	13.35	43.8023	11.2806
Class II	JU2907	JU2907	11	43.8021	11.2906
Class II	JU310	JU310	11.4615	46.63	1.06
Class II	JU311	JU311	22.85	44.42	4.4
Class II	JU3128	JU3128	11.075	37.076	15.2763
Class II	JU3135	JU3135	12	48.7015	2.1725
Class II	JU3137	JU3137	14.4857	48.7015	2.1725
Class II	JU3140	JU3140	18.1	48.71	-3.81
Class II	JU3144	JU3144	11.4	6.18	10.52
Class II	JU3167	JU3167	15.4667	0.289	6.612
Class II	JU3169	JU3169	14.0667	0.289	6.612
Class II	JU3224	JU3224	11.5333	-41.2962	174.785
Class II	JU3226	JU3226	16.8	-41.2908	174.769
Class II	JU3228	JU3228	11.3	-38.6484	176.089
Class II	JU323	JU323	19.2	48.7015	2.1725
Class II	JU3282	JU3282	10.6333	50.0711	14.4203
Class II	JU360	JU360	13.45	48.98	2.23
Class II	JU367	JU367	12.725	48.98	2.23
Class II	JU393	JU393	18.85	49.28	-0.32
Class II	JU394	JU394	20.725	49.28	-0.32
Class II	JU406	JU406	16.575	49.28	-0.32
Class II	JU561	JU561	11.45	48.71	-3.81
Class II	JU775	JU775	12.825	38.7175	-9.1486
Class II	JU778	JU751	18.675	38.719	-9.1491
Class II	JU782	JU751	19.4833	38.7191	-9.1503
Class II	JU792	JU751	21.325	48.7015	2.1725
Class II	JU847	JU751	12.9333	48.46	7.461
Class II	KR314	KR314	10.8	49.28	-123.13
Class II	LKC34	LKC34	12.3	-18	46
Class II	MY1	MY1	16.8	52.54	7.31
Class II	MY10	MY10	21.625	51.96	7.53
Class II	MY18	MY18	19.95	51.96	7.53
Class II	MY2147	MY2147	10	54.3464	10.1177
Class II	MY23	MY23	22.6	23.5415	120.908
Class II	MY2453	MY2453	14.55	48.7015	2.1725
Class II	MY2530	MY2530	11.75	54.3464	10.1177
Class II	MY2573	MY2573	14.35	43.8658	5.0628
Class II	MY2713	MY2713	11	54.3491	10.1151
Class II	MY2741	MY2741	15.0286	54.3464	10.1177
Class II	MY518	MY518	10.8	51.9642	7.61172
Class II	MY679	MY679	14.4	54.3491	10.1151
Class II	MY772	MY772	12.7	54.3464	10.1177
Class II	MY795	MY795	18.375	54.3464	10.1177
Class II	N2	N2	15.475	51.45	-2.59
Class II	NIC1	NIC1	15.575	43.279	5.3543
Class II	NIC1049	NIC1049	11.6	43.5936	1.45032
Class II	NIC1107	NIC1107	10.15	43.7163	7.26694
Class II	NIC166	NIC166	17.4	46.7272	6.89775
Class II	NIC1698	NIC1698	12.25	38.6336	-0.137348
Class II	NIC1779	NIC1779	10.9737	28.5334	-16.2797
Class II	NIC1780	NIC1780	11.475	28.4111	-16.5355
Class II	NIC1782	NIC1782	23.5	28.4111	-16.5355
Class II	NIC1783	NIC1783	15.3621	28.4111	-16.5355
Class II	NIC1785	NIC1785	16.9524	28.4111	-16.5355
Class II	NIC1787	NIC1787	12.7931	28.4111	-16.5355
Class II	NIC1788	NIC1788	22.6	28.4111	-16.5355
Class II	NIC1789	NIC1789	18.3143	28.4111	-16.5355
Class II	NIC1790	NIC1790	17.2564	28.4111	-16.5355
Class II	NIC1791	NIC1791	16.2785	28.4111	-16.5355
Class II	NIC1792	NIC1792	22.8608	28.4111	-16.5355
Class II	NIC1794	NIC1794	16.8919	28.4111	-16.5355
Class II	NIC1796	NIC1796	15.9706	28.4111	-16.5355
Class II	NIC1799	NIC1799	20.7436	28.4111	-16.5355
Class II	NIC1801	NIC1801	14.9459	28.4111	-16.5355
Class II	NIC1802	NIC1802	11.0286	28.4111	-16.5355
Class II	NIC1808	NIC1808	15.6154	28.4983	-16.3993
Class II	NIC1812	NIC1812	16.275	28.4822	-16.4122
Class II	NIC195	NIC195	14.75	38.5459	-28.3732
Class II	NIC199	NIC199	13.55	37.7454	-25.1993
Class II	NIC2	NIC2	11.075	43.279	5.3543
Class II	NIC207	NIC207	12.375	43.7205	7.24045
Class II	NIC231	NIC231	17.4	43.7205	7.24045
Class II	NIC236	NIC236	22.025	39.242	-9.31342
Class II	NIC242	NIC242	18.775	38.6918	-9.31609
Class II	NIC251	NIC251	23.4	38.6662	-28.1514
Class II	NIC252	NIC252	17.375	38.6613	-28.1479
Class II	NIC255	NIC255	12.875	43.7148	7.26678
Class II	NIC256	NIC256	23.575	38.7183	-9.14875
Class II	NIC258	NIC258	15.55	38.7183	-9.14875
Class II	NIC259	NIC259	12.525	38.7183	-9.14875
Class II	NIC260	NIC260	17.7	38.7183	-9.14875
Class II	NIC261	NIC261	10.1375	38.7183	-9.14875
Class II	NIC262	NIC262	14.15	38.7183	-9.14875
Class II	NIC265	NIC265	23.475	38.7183	-9.14875
Class II	NIC266	NIC266	15.525	38.6924	-9.31592
Class II	NIC267	NIC267	15.7	38.6924	-9.31592
Class II	NIC268	NIC268	16.15	38.6924	-9.31592
Class II	NIC269	NIC269	14.15	38.6924	-9.31592
Class II	NIC271	NIC271	17.1	38.6924	-9.31592
Class II	NIC272	NIC272	12.875	39.7695	-8.75636
Class II	NIC274	NIC274	18.8	39.7695	-8.75636
Class II	NIC276	NIC276	14.575	39.7695	-8.75636
Class II	NIC277	NIC277	12.225	43.7166	7.26652
Class II	NIC3	NIC3	10.6	43.3636	5.3215
Class II	NIC501	NIC501	16.9474	48.773	2.2675
Class II	NIC511	NIC511	12.5789	40.8625	14.2624
Class II	NIC513	NIC513	18	38.776	-9.16714
Class II	NIC514	NIC514	11.85	38.776	-9.16714
Class II	NIC515	NIC515	12.05	38.7768	-9.16588
Class II	NIC522	NIC522	14.4	36.5357	-6.30444
Class II	NIC523	NIC523	15.55	36.5357	-6.29831
Class II	PB303	PB303	16.65	NA	NA
Class II	PB306	NA	12.925	NA	NA
Class II	PS2025	PS2025	12.45	34.19	-118.13
Class II	PX179	PX179	14.725	44.035	-123.058
Class II	QG2811	QG2811	13.1	-35.2542	149.115
Class II	QG2818	QG2818	14.7	-28.0474	152.394
Class II	QG2825	QG2825	11.5333	-34.4511	116.033
Class II	QG2827	QG2827	16.5667	-31.9547	115.845
Class II	QG2828	QG2828	10.7333	-31.9547	115.845
Class II	QG2835	QG2835	16.6667	-27.3308	152.759
Class II	QG2837	QG2837	10.7	-27.3308	152.759
Class II	QG2838	QG2838	12.9	-27.3311	152.764
Class II	QG2850	QG2850	13.3	-28.0845	152.507
Class II	QG2854	QG2854	12.2	-28.0826	152.507
Class II	QG2874	QG2874	13.9833	-27.3686	152.184
Class II	QG2875	QG2875	13.6333	-27.3672	152.183
Class II	QG2932	QG2932	10.8333	-28.0538	152.395
Class II	QG536	QG536	16.3	37.7679	-122.442
Class II	QG556	QG556	16.975	34.4216	-119.702
Class II	QG557	QG557	11.175	34.4216	-119.702
Class II	QW947	QW947	22.75	-33.4213	-70.6106
Class II	QX1211	QX1211	10.9875	37.7502	-122.433
Class II	QX1212	QX1212	14.925	37.7502	-122.433
Class II	QX1233	QX1233	14.55	37.8804	-122.284
Class II	QX1791	QX1791	13.075	20.6344	-156.393
Class II	WN2001	WN2001	10.525	51.9544	6.30341
Class II	WN2002	WN2002	16.55	51.9753	5.69483
Class II	WN2033	WN2033	17.8571	51.975	5.694
Class II	WN2050	WN2050	13.5	49.121	1.95103
Class II	WN2063	WN2063	14.1	51.975	5.65132
Class II	WN2066	WN2066	12.8889	51.9753	5.6949
Class II	XZ1514	XZ1514	12.5857	22.149	-159.668
Class II	XZ1515	XZ1515	10.75	22.149	-159.668
Class II	XZ1672	XZ1672	22.9333	47.6877	-122.301
Class II	XZ1735	XZ1735	13.0667	-22.9	-46.7
Class II	XZ1756	XZ1756	16.6667	47.6232	-122.307
Class II	XZ2019	XZ2019	13.9667	47.6365	-122.306
Class III	CX11276	CX11276	35.875	34.2011	-118.212
Class III	ED3005	ED3005	30.25	55.94	-3.36
Class III	JU2587	JU2587	25.175	45.0267	3.87202
Class III	JU2593	JU2593	29.4583	48.8226	2.22233
Class III	JU2829	JU2829	36.45	46.632	1.064
Class III	JU346	JU346	25.05	44.42	4.4
Class III	JU397	JU397	25.275	49.28	-0.32
Class III	JU440	JU440	32.125	48.715	1.56
Class III	JU751	JU751	48.54	48.84	2.5
Class III	JU830	JU830	34.45	48.52	9.05
Class III	NIC1786	NIC1786	28.775	28.4111	-16.5355
Class III	NIC1832	NIC1832	34.1406	47.3675	-2.52884
Class III	NIC275	NIC275	26.125	39.7695	-8.75636
Class III	QX1793	QX1793	25.05	20.7056	-156.357
