# Supplementary material for: Natural variation in the Caenorhabditis elegans egg-laying circuit modulates an intergenerational fitness trade-off
Source: eLife. 2024 Apr 2;12:RP88253. doi: 10.7554/eLife.88253 (PMC10987095; doi:10.7554/eLife.88253)
Supplement: Figure 2—source data 1. [file elife-88253-fig2-data1.xlsx]

## Sheet: Figure 2A
Chromosome	Marker	Position	A1	A2	AF1	BETA	SE	P	log10p	Trait	BF	aboveBF	strain	value	allele	var.exp	startPOS	peakPOS	endPOS	peak_id	interval_size
I	I:3979	3979	G	C	0.321656	-0.0325963	0.079377	0.681328	0.16664376283570895	Mean number of eggs in utero	4.342193628794542	0	NA	NA	NA	NA	NA	NA	NA	NA	NA
I	I:6580	6580	T	A	0.248408	-0.00804344	0.0816512	0.921528	0.035491464502692464	Mean number of eggs in utero	4.342193628794542	0	NA	NA	NA	NA	NA	NA	NA	NA	NA
I	I:8174	8174	T	C	0.0732484	-0.276428	0.263974	0.295018	0.5301514855059386	Mean number of eggs in utero	4.342193628794542	0	NA	NA	NA	NA	NA	NA	NA	NA	NA
I	I:13117	13117	A	C	0.105096	0.178266	0.113809	0.117266	0.9308278885903541	Mean number of eggs in utero	4.342193628794542	0	NA	NA	NA	NA	NA	NA	NA	NA	NA
I	I:15024	15024	A	G	0.136943	-0.0546034	0.107998	0.613141	0.21243964215296565	Mean number of eggs in utero	4.342193628794542	0	NA	NA	NA	NA	NA	NA	NA	NA	NA
I	I:17509	17509	G	A	0.0605096	-0.0472116	0.135624	0.72776	0.1380118182972847	Mean number of eggs in utero	4.342193628794542	0	NA	NA	NA	NA	NA	NA	NA	NA	NA
I	I:41980	41980	G	A	0.321656	-0.0325963	0.079377	0.681328	0.16664376283570895	Mean number of eggs in utero	4.342193628794542	0	NA	NA	NA	NA	NA	NA	NA	NA	NA
I	I:43212	43212	T	G	0.248408	-0.00804344	0.0816512	0.921528	0.035491464502692464	Mean number of eggs in utero	4.342193628794542	0	NA	NA	NA	NA	NA	NA	NA	NA	NA
I	I:52316	52316	C	T	0.0732484	-0.276428	0.263974	0.295018	0.5301514855059386	Mean number of eggs in utero	4.342193628794542	0	NA	NA	NA	NA	NA	NA	NA	NA	NA
I	I:62304	62304	A	G	0.0573248	0.0336781	0.314822	0.914809	0.03866957140338469	Mean number of eggs in utero	4.342193628794542	0	NA	NA	NA	NA	NA	NA	NA	NA	NA
I	I:62576	62576	A	T	0.0605096	-0.105636	0.133601	0.429131	0.36741011132925844	Mean number of eggs in utero	4.342193628794542	0	NA	NA	NA	NA	NA	NA	NA	NA	NA
I	I:68640	68640	A	G	0.105096	0.178266	0.113809	0.117266	0.9308278885903541	Mean number of eggs in utero	4.342193628794542	0	NA	NA	NA	NA	NA	NA	NA	NA	NA
I	I:86468	86468	G	A	0.321656	-0.0325963	0.079377	0.681328	0.16664376283570895	Mean number of eggs in utero	4.342193628794542	0	NA	NA	NA	NA	NA	NA	NA	NA	NA
I	I:105302	105302	A	C	0.0732484	-0.276428	0.263974	0.295018	0.5301514855059386	Mean number of eggs in utero	4.342193628794542	0	NA	NA	NA	NA	NA	NA	NA	NA	NA
I	I:105643	105643	T	G	0.0573248	0.0336781	0.314822	0.914809	0.03866957140338469	Mean number of eggs in utero	4.342193628794542	0	NA	NA	NA	NA	NA	NA	NA	NA	NA
I	I:108121	108121	A	T	0.417197	-0.00543737	0.0715456	0.93942	0.027140198041233504	Mean number of eggs in utero	4.342193628794542	0	NA	NA	NA	NA	NA	NA	NA	NA	NA
I	I:109460	109460	A	T	0.213376	-0.0734999	0.0871085	0.398796	0.39924920639508527	Mean number of eggs in utero	4.342193628794542	0	NA	NA	NA	NA	NA	NA	NA	NA	NA
I	I:113772	113772	A	T	0.251592	-0.0143438	0.0811319	0.859668	0.06566923899638936	Mean number of eggs in utero	4.342193628794542	0	NA	NA	NA	NA	NA	NA	NA	NA	NA
I	I:116374	116374	T	G	0.156051	0.104266	0.0922076	0.258149	0.5881295529538613	Mean number of eggs in utero	4.342193628794542	0	NA	NA	NA	NA	NA	NA	NA	NA	NA
I	I:123411	123411	T	G	0.105096	0.178266	0.113809	0.117266	0.9308278885903541	Mean number of eggs in utero	4.342193628794542	0	NA	NA	NA	NA	NA	NA	NA	NA	NA
I	I:128077	128077	T	A	0.321656	-0.0325963	0.079377	0.681328	0.16664376283570895	Mean number of eggs in utero	4.342193628794542	0	NA	NA	NA	NA	NA	NA	NA	NA	NA
I	I:136765	136765	G	A	0.0732484	-0.276428	0.263974	0.295018	0.5301514855059386	Mean number of eggs in utero	4.342193628794542	0	NA	NA	NA	NA	NA	NA	NA	NA	NA
I	I:155895	155895	T	A	0.0573248	0.0960072	0.141916	0.498719	0.30214408588636693	Mean number of eggs in utero	4.342193628794542	0	NA	NA	NA	NA	NA	NA	NA	NA	NA
I	I:159475	159475	A	G	0.248408	-0.00804344	0.0816512	0.921528	0.035491464502692464	Mean number of eggs in utero	4.342193628794542	0	NA	NA	NA	NA	NA	NA	NA	NA	NA
I	I:161490	161490	T	A	0.0605096	-0.0472116	0.135624	0.72776	0.1380118182972847	Mean number of eggs in utero	4.342193628794542	0	NA	NA	NA	NA	NA	NA	NA	NA	NA
I	I:171171	171171	A	G	0.105096	0.178266	0.113809	0.117266	0.9308278885903541	Mean number of eggs in utero	4.342193628794542	0	NA	NA	NA	NA	NA	NA	NA	NA	NA
I	I:179651	179651	G	C	0.321656	-0.0325963	0.079377	0.681328	0.16664376283570895	Mean number of eggs in utero	4.342193628794542	0	NA	NA	NA	NA	NA	NA	NA	NA	NA
I	I:180511	180511	T	A	0.0987261	0.17395	0.169852	0.305777	0.5145951845507202	Mean number of eggs in utero	4.342193628794542	0	NA	NA	NA	NA	NA	NA	NA	NA	NA
I	I:184470	184470	G	A	0.136943	-0.0546034	0.107998	0.613141	0.21243964215296565	Mean number of eggs in utero	4.342193628794542	0	NA	NA	NA	NA	NA	NA	NA	NA	NA
I	I:197167	197167	C	T	0.0732484	-0.276428	0.263974	0.295018	0.5301514855059386	Mean number of eggs in utero	4.342193628794542	0	NA	NA	NA	NA	NA	NA	NA	NA	NA
I	I:257188	257188	C	T	0.0573248	0.0336781	0.314822	0.914809	0.03866957140338469	Mean number of eggs in utero	4.342193628794542	0	NA	NA	NA	NA	NA	NA	NA	NA	NA
I	I:260562	260562	G	T	0.248408	-0.00804344	0.0816512	0.921528	0.035491464502692464	Mean number of eggs in utero	4.342193628794542	0	NA	NA	NA	NA	NA	NA	NA	NA	NA
I	I:267874	267874	C	T	0.321656	-0.0325963	0.079377	0.681328	0.16664376283570895	Mean number of eggs in utero	4.342193628794542	0	NA	NA	NA	NA	NA	NA	NA	NA	NA
I	I:275446	275446	T	A	0.127389	0.128901	0.107166	0.229045	0.6400791843336986	Mean number of eggs in utero	4.342193628794542	0	NA	NA	NA	NA	NA	NA	NA	NA	NA
I	I:276422	276422	T	G	0.117834	-0.0814008	0.134752	0.545791	0.26297363004861296	Mean number of eggs in utero	4.342193628794542	0	NA	NA	NA	NA	NA	NA	NA	NA	NA
I	I:276696	276696	T	G	0.101911	0.168327	0.115869	0.146296	0.8347675481171786	Mean number of eggs in utero	4.342193628794542	0	NA	NA	NA	NA	NA	NA	NA	NA	NA
I	I:279038	279038	T	G	0.0732484	-0.276428	0.263974	0.295018	0.5301514855059386	Mean number of eggs in utero	4.342193628794542	0	NA	NA	NA	NA	NA	NA	NA	NA	NA
I	I:304058	304058	C	T	0.248408	-0.00804344	0.0816512	0.921528	0.035491464502692464	Mean number of eggs in utero	4.342193628794542	0	NA	NA	NA	NA	NA	NA	NA	NA	NA
I	I:314248	314248	A	G	0.0605096	-0.0472116	0.135624	0.72776	0.1380118182972847	Mean number of eggs in utero	4.342193628794542	0	NA	NA	NA	NA	NA	NA	NA	NA	NA
I	I:314355	314355	G	A	0.321656	-0.0325963	0.079377	0.681328	0.16664376283570895	Mean number of eggs in utero	4.342193628794542	0	NA	NA	NA	NA	NA	NA	NA	NA	NA
I	I:315919	315919	A	G	0.257962	-0.0699992	0.0806671	0.385529	0.4139429481804059	Mean number of eggs in utero	4.342193628794542	0	NA	NA	NA	NA	NA	NA	NA	NA	NA
I	I:321873	321873	A	G	0.105096	0.178266	0.113809	0.117266	0.9308278885903541	Mean number of eggs in utero	4.342193628794542	0	NA	NA	NA	NA	NA	NA	NA	NA	NA
I	I:345738	345738	A	C	0.0732484	-0.276428	0.263974	0.295018	0.5301514855059386	Mean number of eggs in utero	4.342193628794542	0	NA	NA	NA	NA	NA	NA	NA	NA	NA
I	I:370339	370339	C	T	0.136943	-0.0546034	0.107998	0.613141	0.21243964215296565	Mean number of eggs in utero	4.342193628794542	0	NA	NA	NA	NA	NA	NA	NA	NA	NA
I	I:378499	378499	G	T	0.210191	-0.0579687	0.088311	0.511557	0.2911059681956684	Mean number of eggs in utero	4.342193628794542	0	NA	NA	NA	NA	NA	NA	NA	NA	NA
I	I:379448	379448	A	G	0.257962	-0.0388938	0.084948	0.647057	0.18905746014258612	Mean number of eggs in utero	4.342193628794542	0	NA	NA	NA	NA	NA	NA	NA	NA	NA
I	I:390371	390371	T	A	0.356688	0.0565928	0.069808	0.417542	0.3792998328730213	Mean number of eggs in utero	4.342193628794542	0	NA	NA	NA	NA	NA	NA	NA	NA	NA
I	I:390716	390716	C	G	0.0636943	-0.0649912	0.147763	0.660058	0.18041790086233991	Mean number of eggs in utero	4.342193628794542	0	NA	NA	NA	NA	NA	NA	NA	NA	NA
I	I:414966	414966	G	T	0.315287	-0.0548385	0.0744263	0.461234	0.33607868605181634	Mean number of eggs in utero	4.342193628794542	0	NA	NA	NA	NA	NA	NA	NA	NA	NA
I	I:423052	423052	C	T	0.0700637	-0.255774	0.292267	0.381499	0.418506596097177	Mean number of eggs in utero	4.342193628794542	0	NA	NA	NA	NA	NA	NA	NA	NA	NA
I	I:427621	427621	A	G	0.149682	0.178876	0.097239	0.0658337	1.1815517359085772	Mean number of eggs in utero	4.342193628794542	0	NA	NA	NA	NA	NA	NA	NA	NA	NA
I	I:437412	437412	G	T	0.210191	-0.0579687	0.088311	0.511557	0.2911059681956684	Mean number of eggs in utero	4.342193628794542	0	NA	NA	NA	NA	NA	NA	NA	NA	NA
I	I:438177	438177	A	C	0.111465	0.175716	0.110366	0.111355	0.9532902777439289	Mean number of eggs in utero	4.342193628794542	0	NA	NA	NA	NA	NA	NA	NA	NA	NA
I	I:452643	452643	T	G	0.111465	-0.0880181	0.154442	0.568739	0.24508698995768657	Mean number of eggs in utero	4.342193628794542	0	NA	NA	NA	NA	NA	NA	NA	NA	NA
I	I:460162	460162	G	A	0.0700637	-0.255774	0.292267	0.381499	0.418506596097177	Mean number of eggs in utero	4.342193628794542	0	NA	NA	NA	NA	NA	NA	NA	NA	NA
I	I:463909	463909	G	C	0.16242	0.173974	0.0928483	0.0609656	1.2149151476822813	Mean number of eggs in utero	4.342193628794542	0	NA	NA	NA	NA	NA	NA	NA	NA	NA
I	I:465493	465493	G	T	0.124204	0.171126	0.104439	0.101312	0.994339111153757	Mean number of eggs in utero	4.342193628794542	0	NA	NA	NA	NA	NA	NA	NA	NA	NA
I	I:466067	466067	C	T	0.136943	-0.0546034	0.107998	0.613141	0.21243964215296565	Mean number of eggs in utero	4.342193628794542	0	NA	NA	NA	NA	NA	NA	NA	NA	NA
I	I:476760	476760	T	G	0.066879	-0.0227597	0.129312	0.860289	0.06535563012711969	Mean number of eggs in utero	4.342193628794542	0	NA	NA	NA	NA	NA	NA	NA	NA	NA
I	I:486474	486474	C	T	0.210191	-0.0579687	0.088311	0.511557	0.2911059681956684	Mean number of eggs in utero	4.342193628794542	0	NA	NA	NA	NA	NA	NA	NA	NA	NA
I	I:490260	490260	A	G	0.0605096	-0.105636	0.133601	0.429131	0.36741011132925844	Mean number of eggs in utero	4.342193628794542	0	NA	NA	NA	NA	NA	NA	NA	NA	NA
I	I:491763	491763	T	A	0.414013	0.0594943	0.0683497	0.38406	0.41560092242056595	Mean number of eggs in utero	4.342193628794542	0	NA	NA	NA	NA	NA	NA	NA	NA	NA
I	I:495881	495881	C	A	0.0605096	-0.0472116	0.135624	0.72776	0.1380118182972847	Mean number of eggs in utero	4.342193628794542	0	NA	NA	NA	NA	NA	NA	NA	NA	NA
I	I:497133	497133	T	C	0.0796178	-0.16225	0.241495	0.501673	0.2995792720369297	Mean number of eggs in utero	4.342193628794542	0	NA	NA	NA	NA	NA	NA	NA	NA	NA
I	I:500958	500958	T	C	0.165605	0.162231	0.0926355	0.0798978	1.0974651788964502	Mean number of eggs in utero	4.342193628794542	0	NA	NA	NA	NA	NA	NA	NA	NA	NA
I	I:502109	502109	T	A	0.127389	0.15663	0.104246	0.132966	0.8762593958757072	Mean number of eggs in utero	4.342193628794542	0	NA	NA	NA	NA	NA	NA	NA	NA	NA
I	I:510732	510732	G	T	0.216561	-0.00115944	0.0765675	0.987918	0.005279101591956788	Mean number of eggs in utero	4.342193628794542	0	NA	NA	NA	NA	NA	NA	NA	NA	NA
I	I:527116	527116	T	C	0.101911	0.0732733	0.168896	0.664407	0.1775658005954796	Mean number of eggs in utero	4.342193628794542	0	NA	NA	NA	NA	NA	NA	NA	NA	NA
I	I:528981	528981	T	G	0.0636943	-0.055286	0.132735	0.677034	0.16938952091365775	Mean number of eggs in utero	4.342193628794542	0	NA	NA	NA	NA	NA	NA	NA	NA	NA
I	I:530978	530978	T	C	0.22293	-0.0197346	0.0854919	0.817442	0.08754305209097936	Mean number of eggs in utero	4.342193628794542	0	NA	NA	NA	NA	NA	NA	NA	NA	NA
I	I:562960	562960	A	G	0.136943	-0.0546034	0.107998	0.613141	0.21243964215296565	Mean number of eggs in utero	4.342193628794542	0	NA	NA	NA	NA	NA	NA	NA	NA	NA
I	I:571535	571535	T	A	0.238854	-0.0677261	0.0831541	0.415379	0.38155546354154846	Mean number of eggs in utero	4.342193628794542	0	NA	NA	NA	NA	NA	NA	NA	NA	NA
I	I:595105	595105	C	G	0.0636943	-0.0229712	0.209239	0.91258	0.03972905340777706	Mean number of eggs in utero	4.342193628794542	0	NA	NA	NA	NA	NA	NA	NA	NA	NA
I	I:603304	603304	A	T	0.089172	-0.0689561	0.129562	0.594571	0.22579627718139625	Mean number of eggs in utero	4.342193628794542	0	NA	NA	NA	NA	NA	NA	NA	NA	NA
I	I:614072	614072	T	C	0.0796178	-0.14612	0.206132	0.478407	0.32020247442279715	Mean number of eggs in utero	4.342193628794542	0	NA	NA	NA	NA	NA	NA	NA	NA	NA
I	I:630403	630403	G	A	0.286624	0.0182421	0.0795672	0.818662	0.08689536787759916	Mean number of eggs in utero	4.342193628794542	0	NA	NA	NA	NA	NA	NA	NA	NA	NA
I	I:637363	637363	T	A	0.203822	0.14366	0.0875267	0.10073	0.996841166049138	Mean number of eggs in utero	4.342193628794542	0	NA	NA	NA	NA	NA	NA	NA	NA	NA
I	I:639338	639338	T	A	0.143312	0.110449	0.0981658	0.260535	0.5841339257777994	Mean number of eggs in utero	4.342193628794542	0	NA	NA	NA	NA	NA	NA	NA	NA	NA
I	I:645306	645306	T	C	0.257962	-0.0527697	0.0794699	0.506677	0.2952688095435396	Mean number of eggs in utero	4.342193628794542	0	NA	NA	NA	NA	NA	NA	NA	NA	NA
I	I:664603	664603	C	T	0.066879	0.177157	0.189416	0.349644	0.45637391998844723	Mean number of eggs in utero	4.342193628794542	0	NA	NA	NA	NA	NA	NA	NA	NA	NA
I	I:674446	674446	C	G	0.0605096	0.00674284	0.147857	0.963626	0.01609149063281043	Mean number of eggs in utero	4.342193628794542	0	NA	NA	NA	NA	NA	NA	NA	NA	NA
I	I:675688	675688	T	A	0.066879	-0.160486	0.126697	0.205267	0.6876808649005681	Mean number of eggs in utero	4.342193628794542	0	NA	NA	NA	NA	NA	NA	NA	NA	NA
I	I:675746	675746	A	C	0.178344	0.143233	0.0939529	0.12738	0.8948987554503576	Mean number of eggs in utero	4.342193628794542	0	NA	NA	NA	NA	NA	NA	NA	NA	NA
I	I:681905	681905	T	A	0.0541401	0.176612	0.366833	0.630196	0.200524357720954	Mean number of eggs in utero	4.342193628794542	0	NA	NA	NA	NA	NA	NA	NA	NA	NA
I	I:694829	694829	A	G	0.194268	0.133016	0.101197	0.188701	0.7242257983335787	Mean number of eggs in utero	4.342193628794542	0	NA	NA	NA	NA	NA	NA	NA	NA	NA
I	I:695386	695386	T	C	0.152866	0.138208	0.0947245	0.144551	0.8399788995451761	Mean number of eggs in utero	4.342193628794542	0	NA	NA	NA	NA	NA	NA	NA	NA	NA
I	I:695452	695452	C	T	0.273885	0.139967	0.088417	0.113413	0.9453371614512693	Mean number of eggs in utero	4.342193628794542	0	NA	NA	NA	NA	NA	NA	NA	NA	NA
I	I:703316	703316	A	G	0.191083	0.0923567	0.0846777	0.275411	0.5600187178775793	Mean number of eggs in utero	4.342193628794542	0	NA	NA	NA	NA	NA	NA	NA	NA	NA
I	I:716699	716699	T	A	0.0700637	-0.255774	0.292267	0.381499	0.418506596097177	Mean number of eggs in utero	4.342193628794542	0	NA	NA	NA	NA	NA	NA	NA	NA	NA
I	I:719322	719322	A	G	0.130573	0.164997	0.105376	0.117395	0.9303503998401226	Mean number of eggs in utero	4.342193628794542	0	NA	NA	NA	NA	NA	NA	NA	NA	NA
I	I:727377	727377	A	G	0.133758	0.178553	0.104354	0.087075	1.0601065168697261	Mean number of eggs in utero	4.342193628794542	0	NA	NA	NA	NA	NA	NA	NA	NA	NA
I	I:730439	730439	T	C	0.0796178	0.0877921	0.118286	0.457964	0.3391686600219846	Mean number of eggs in utero	4.342193628794542	0	NA	NA	NA	NA	NA	NA	NA	NA	NA
I	I:734890	734890	A	G	0.0955414	-0.237422	0.189029	0.209113	0.6796189674082104	Mean number of eggs in utero	4.342193628794542	0	NA	NA	NA	NA	NA	NA	NA	NA	NA
I	I:736799	736799	T	C	0.0509554	-0.0192514	0.142635	0.892636	0.04932560205063992	Mean number of eggs in utero	4.342193628794542	0	NA	NA	NA	NA	NA	NA	NA	NA	NA
I	I:736943	736943	G	T	0.207006	-0.0435911	0.0876199	0.618835	0.2084251314998034	Mean number of eggs in utero	4.342193628794542	0	NA	NA	NA	NA	NA	NA	NA	NA	NA
I	I:744972	744972	C	T	0.0605096	-0.0385528	0.170599	0.821213	0.0855441842605579	Mean number of eggs in utero	4.342193628794542	0	NA	NA	NA	NA	NA	NA	NA	NA	NA
I	I:756171	756171	G	A	0.089172	0.0253672	0.169557	0.881073	0.05498810727039309	Mean number of eggs in utero	4.342193628794542	0	NA	NA	NA	NA	NA	NA	NA	NA	NA
I	I:758742	758742	C	T	0.0636943	-0.0216701	0.13209	0.869688	0.06063652230171953	Mean number of eggs in utero	4.342193628794542	0	NA	NA	NA	NA	NA	NA	NA	NA	NA
I	I:760581	760581	G	C	0.0700637	-0.255774	0.292267	0.381499	0.418506596097177	Mean number of eggs in utero	4.342193628794542	0	NA	NA	NA	NA	NA	NA	NA	NA	NA
I	I:761505	761505	G	T	0.16879	0.107486	0.0900655	0.232706	0.63319241889076	Mean number of eggs in utero	4.342193628794542	0	NA	NA	NA	NA	NA	NA	NA	NA	NA
I	I:762356	762356	T	G	0.10828	0.141762	0.117573	0.22792	0.6422175637685795	Mean number of eggs in utero	4.342193628794542	0	NA	NA	NA	NA	NA	NA	NA	NA	NA
I	I:780481	780481	G	T	0.207006	-0.0435911	0.0876199	0.618835	0.2084251314998034	Mean number of eggs in utero	4.342193628794542	0	NA	NA	NA	NA	NA	NA	NA	NA	NA
I	I:781111	781111	T	C	0.0541401	-0.0257332	0.139163	0.853296	0.06890029020704162	Mean number of eggs in utero	4.342193628794542	0	NA	NA	NA	NA	NA	NA	NA	NA	NA
I	I:782297	782297	C	G	0.283439	-0.0684402	0.077116	0.374811	0.4261876718685743	Mean number of eggs in utero	4.342193628794542	0	NA	NA	NA	NA	NA	NA	NA	NA	NA
I	I:783283	783283	T	C	0.340764	0.0548695	0.0715482	0.443147	0.35345218642026077	Mean number of eggs in utero	4.342193628794542	0	NA	NA	NA	NA	NA	NA	NA	NA	NA
I	I:786475	786475	C	T	0.0509554	0.0844071	0.217264	0.697646	0.15636489148212174	Mean number of eggs in utero	4.342193628794542	0	NA	NA	NA	NA	NA	NA	NA	NA	NA
I	I:788966	788966	A	G	0.0700637	-0.255774	0.292267	0.381499	0.418506596097177	Mean number of eggs in utero	4.342193628794542	0	NA	NA	NA	NA	NA	NA	NA	NA	NA
I	I:803754	803754	G	C	0.0509554	-0.0192514	0.142635	0.892636	0.04932560205063992	Mean number of eggs in utero	4.342193628794542	0	NA	NA	NA	NA	NA	NA	NA	NA	NA
I	I:807505	807505	T	A	0.216561	0.108887	0.0829484	0.18928	0.7228952727161448	Mean number of eggs in utero	4.342193628794542	0	NA	NA	NA	NA	NA	NA	NA	NA	NA
I	I:811002	811002	T	C	0.0636943	-0.0216701	0.13209	0.869688	0.06063652230171953	Mean number of eggs in utero	4.342193628794542	0	NA	NA	NA	NA	NA	NA	NA	NA	NA
I	I:816631	816631	A	T	0.0923567	-0.0177694	0.112061	0.874009	0.058484095248648844	Mean number of eggs in utero	4.342193628794542	0	NA	NA	NA	NA	NA	NA	NA	NA	NA
I	I:819510	819510	C	A	0.140127	0.177085	0.101873	0.0821616	1.0853311119569673	Mean number of eggs in utero	4.342193628794542	0	NA	NA	NA	NA	NA	NA	NA	NA	NA
I	I:820625	820625	C	T	0.11465	0.140455	0.113402	0.215509	0.6665345882934108	Mean number of eggs in utero	4.342193628794542	0	NA	NA	NA	NA	NA	NA	NA	NA	NA
I	I:824619	824619	T	C	0.229299	-0.00841175	0.0846664	0.920859	0.03580686297344043	Mean number of eggs in utero	4.342193628794542	0	NA	NA	NA	NA	NA	NA	NA	NA	NA
I	I:835423	835423	A	T	0.261146	0.14545	0.0904315	0.107748	0.9675907823925214	Mean number of eggs in utero	4.342193628794542	0	NA	NA	NA	NA	NA	NA	NA	NA	NA
I	I:836363	836363	T	C	0.484076	0.0629238	0.071275	0.377327	0.423282117323599	Mean number of eggs in utero	4.342193628794542	0	NA	NA	NA	NA	NA	NA	NA	NA	NA
I	I:839222	839222	G	A	0.101911	-0.0538319	0.161194	0.738412	0.1317012541660067	Mean number of eggs in utero	4.342193628794542	0	NA	NA	NA	NA	NA	NA	NA	NA	NA
I	I:846665	846665	T	C	0.321656	0.0350756	0.0739288	0.635179	0.19710386879078695	Mean number of eggs in utero	4.342193628794542	0	NA	NA	NA	NA	NA	NA	NA	NA	NA
I	I:847638	847638	T	C	0.286624	-0.0531281	0.077295	0.491868	0.30815143089763375	Mean number of eggs in utero	4.342193628794542	0	NA	NA	NA	NA	NA	NA	NA	NA	NA
I	I:847650	847650	C	T	0.0764331	-0.136087	0.251493	0.588427	0.2303074078649963	Mean number of eggs in utero	4.342193628794542	0	NA	NA	NA	NA	NA	NA	NA	NA	NA
I	I:850499	850499	G	A	0.213376	0.108102	0.100063	0.279991	0.552855928347624	Mean number of eggs in utero	4.342193628794542	0	NA	NA	NA	NA	NA	NA	NA	NA	NA
I	I:868535	868535	A	T	0.0509554	-0.120587	0.14518	0.406196	0.3912643576089102	Mean number of eggs in utero	4.342193628794542	0	NA	NA	NA	NA	NA	NA	NA	NA	NA
I	I:873273	873273	G	C	0.0636943	0.0572192	0.136135	0.674258	0.17117389198631522	Mean number of eggs in utero	4.342193628794542	0	NA	NA	NA	NA	NA	NA	NA	NA	NA
I	I:874770	874770	T	C	0.156051	-0.039962	0.108508	0.712661	0.14711700709084383	Mean number of eggs in utero	4.342193628794542	0	NA	NA	NA	NA	NA	NA	NA	NA	NA
I	I:875746	875746	G	A	0.184713	0.0161293	0.117374	0.890701	0.050268060096734714	Mean number of eggs in utero	4.342193628794542	0	NA	NA	NA	NA	NA	NA	NA	NA	NA
I	I:875953	875953	T	G	0.111465	0.064465	0.122417	0.598469	0.222958340625357	Mean number of eggs in utero	4.342193628794542	0	NA	NA	NA	NA	NA	NA	NA	NA	NA
I	I:876547	876547	A	G	0.0732484	0.151438	0.146046	0.299772	0.523208934574415	Mean number of eggs in utero	4.342193628794542	0	NA	NA	NA	NA	NA	NA	NA	NA	NA
I	I:881269	881269	G	T	0.111465	-0.125242	0.145337	0.388833	0.41023688389565016	Mean number of eggs in utero	4.342193628794542	0	NA	NA	NA	NA	NA	NA	NA	NA	NA
I	I:884389	884389	T	G	0.136943	-0.0546034	0.107998	0.613141	0.21243964215296565	Mean number of eggs in utero	4.342193628794542	0	NA	NA	NA	NA	NA	NA	NA	NA	NA
I	I:889157	889157	T	C	0.210191	-0.0547662	0.0862616	0.525503	0.2794248003213208	Mean number of eggs in utero	4.342193628794542	0	NA	NA	NA	NA	NA	NA	NA	NA	NA
I	I:912022	912022	T	C	0.105096	-0.0604891	0.158318	0.702407	0.15341116901792046	Mean number of eggs in utero	4.342193628794542	0	NA	NA	NA	NA	NA	NA	NA	NA	NA
I	I:913928	913928	G	A	0.280255	-0.026142	0.0792145	0.741388	0.12995444767785946	Mean number of eggs in utero	4.342193628794542	0	NA	NA	NA	NA	NA	NA	NA	NA	NA
I	I:917584	917584	C	T	0.0796178	-0.226686	0.233887	0.332439	0.4782880327481946	Mean number of eggs in utero	4.342193628794542	0	NA	NA	NA	NA	NA	NA	NA	NA	NA
I	I:922115	922115	G	A	0.124204	0.0202414	0.164502	0.90207	0.04475976020288136	Mean number of eggs in utero	4.342193628794542	0	NA	NA	NA	NA	NA	NA	NA	NA	NA
I	I:926730	926730	A	T	0.184713	0.022451	0.0823389	0.78511	0.10506949096657973	Mean number of eggs in utero	4.342193628794542	0	NA	NA	NA	NA	NA	NA	NA	NA	NA
I	I:951158	951158	A	G	0.121019	0.138191	0.108258	0.20178	0.6951218823017208	Mean number of eggs in utero	4.342193628794542	0	NA	NA	NA	NA	NA	NA	NA	NA	NA
I	I:973119	973119	C	T	0.254777	0.00365315	0.079663	0.963424	0.01618253911174537	Mean number of eggs in utero	4.342193628794542	0	NA	NA	NA	NA	NA	NA	NA	NA	NA
I	I:975649	975649	T	C	0.296178	-0.0892601	0.0764381	0.24291	0.6145546060041586	Mean number of eggs in utero	4.342193628794542	0	NA	NA	NA	NA	NA	NA	NA	NA	NA
I	I:978053	978053	G	T	0.140127	-0.048756	0.106491	0.647068	0.1890500771783423	Mean number of eggs in utero	4.342193628794542	0	NA	NA	NA	NA	NA	NA	NA	NA	NA
I	I:984961	984961	C	G	0.442675	0.0558334	0.07001	0.425158	0.37144964459362356	Mean number of eggs in utero	4.342193628794542	0	NA	NA	NA	NA	NA	NA	NA	NA	NA
I	I:986279	986279	G	A	0.375796	-0.0387968	0.076962	0.614189	0.21169796594908857	Mean number of eggs in utero	4.342193628794542	0	NA	NA	NA	NA	NA	NA	NA	NA	NA
I	I:986339	986339	C	A	0.299363	-0.0362295	0.0786395	0.645011	0.19043287885532872	Mean number of eggs in utero	4.342193628794542	0	NA	NA	NA	NA	NA	NA	NA	NA	NA
I	I:991525	991525	C	A	0.0509554	-0.106321	0.197615	0.590564	0.22873303058101682	Mean number of eggs in utero	4.342193628794542	0	NA	NA	NA	NA	NA	NA	NA	NA	NA
I	I:992266	992266	T	A	0.394904	0.0206713	0.0710001	0.77094	0.1129794205001246	Mean number of eggs in utero	4.342193628794542	0	NA	NA	NA	NA	NA	NA	NA	NA	NA
I	I:992525	992525	G	A	0.257962	0.118856	0.0894657	0.18401	0.7351585746708521	Mean number of eggs in utero	4.342193628794542	0	NA	NA	NA	NA	NA	NA	NA	NA	NA
I	I:992871	992871	A	G	0.261146	-0.0194649	0.0822634	0.812954	0.08993402772863703	Mean number of eggs in utero	4.342193628794542	0	NA	NA	NA	NA	NA	NA	NA	NA	NA
I	I:993801	993801	A	T	0.156051	0.134702	0.0982134	0.170211	0.7690123767723976	Mean number of eggs in utero	4.342193628794542	0	NA	NA	NA	NA	NA	NA	NA	NA	NA
I	I:995908	995908	T	C	0.487261	-0.0563441	0.0695948	0.418169	0.37864816575066584	Mean number of eggs in utero	4.342193628794542	0	NA	NA	NA	NA	NA	NA	NA	NA	NA
I	I:997360	997360	T	G	0.111465	0.150066	0.115217	0.19276	0.7149830823708292	Mean number of eggs in utero	4.342193628794542	0	NA	NA	NA	NA	NA	NA	NA	NA	NA
I	I:1003648	1003648	G	A	0.175159	0.142442	0.0925372	0.123731	0.9075214770705698	Mean number of eggs in utero	4.342193628794542	0	NA	NA	NA	NA	NA	NA	NA	NA	NA
I	I:1004131	1004131	T	A	0.0796178	-0.101433	0.216438	0.639322	0.19428035060413307	Mean number of eggs in utero	4.342193628794542	0	NA	NA	NA	NA	NA	NA	NA	NA	NA
I	I:1006934	1006934	T	G	0.267516	-0.0318208	0.0811687	0.695034	0.15799394986857176	Mean number of eggs in utero	4.342193628794542	0	NA	NA	NA	NA	NA	NA	NA	NA	NA
I	I:1033036	1033036	T	C	0.10828	0.090794	0.115812	0.433052	0.3634599513207093	Mean number of eggs in utero	4.342193628794542	0	NA	NA	NA	NA	NA	NA	NA	NA	NA
I	I:1038911	1038911	G	A	0.369427	-0.0407948	0.0754427	0.588688	0.23011481689192348	Mean number of eggs in utero	4.342193628794542	0	NA	NA	NA	NA	NA	NA	NA	NA	NA
I	I:1054537	1054537	C	T	0.0541401	0.176612	0.366833	0.630196	0.200524357720954	Mean number of eggs in utero	4.342193628794542	0	NA	NA	NA	NA	NA	NA	NA	NA	NA
I	I:1059258	1059258	C	T	0.175159	0.0806134	0.0878842	0.359002	0.44490313196055453	Mean number of eggs in utero	4.342193628794542	0	NA	NA	NA	NA	NA	NA	NA	NA	NA
I	I:1059264	1059264	T	C	0.187898	0.0367891	0.0819194	0.653368	0.18484213977754252	Mean number of eggs in utero	4.342193628794542	0	NA	NA	NA	NA	NA	NA	NA	NA	NA
I	I:1062436	1062436	A	T	0.0923567	-0.0205242	0.114324	0.857524	0.06675371627445578	Mean number of eggs in utero	4.342193628794542	0	NA	NA	NA	NA	NA	NA	NA	NA	NA
I	I:1068572	1068572	T	C	0.143312	7.62077e-4	0.105169	0.994218	0.0025183783626714228	Mean number of eggs in utero	4.342193628794542	0	NA	NA	NA	NA	NA	NA	NA	NA	NA
I	I:1071327	1071327	A	G	0.133758	-3.07549e-4	0.122742	0.998001	8.690235480353709e-4	Mean number of eggs in utero	4.342193628794542	0	NA	NA	NA	NA	NA	NA	NA	NA	NA
I	I:1071437	1071437	A	G	0.066879	-0.00584835	0.128861	0.9638	0.01601307803481035	Mean number of eggs in utero	4.342193628794542	0	NA	NA	NA	NA	NA	NA	NA	NA	NA
I	I:1086755	1086755	A	C	0.458599	0.0448545	0.0748137	0.548806	0.26058114920974645	Mean number of eggs in utero	4.342193628794542	0	NA	NA	NA	NA	NA	NA	NA	NA	NA
I	I:1086960	1086960	G	T	0.0732484	-0.0901118	0.256848	0.72571	0.13923689246910298	Mean number of eggs in utero	4.342193628794542	0	NA	NA	NA	NA	NA	NA	NA	NA	NA
I	I:1087239	1087239	T	C	0.0573248	0.0773694	0.151915	0.610545	0.2142823210205667	Mean number of eggs in utero	4.342193628794542	0	NA	NA	NA	NA	NA	NA	NA	NA	NA
I	I:1088775	1088775	A	G	0.0923567	0.0286165	0.117368	0.807371	0.09292685409112983	Mean number of eggs in utero	4.342193628794542	0	NA	NA	NA	NA	NA	NA	NA	NA	NA
I	I:1089080	1089080	C	T	0.184713	0.00397478	0.0885362	0.964191	0.015836926647431273	Mean number of eggs in utero	4.342193628794542	0	NA	NA	NA	NA	NA	NA	NA	NA	NA
I	I:1090252	1090252	C	T	0.270701	0.0553077	0.0856054	0.518229	0.28547828763044375	Mean number of eggs in utero	4.342193628794542	0	NA	NA	NA	NA	NA	NA	NA	NA	NA
I	I:1095862	1095862	T	A	0.149682	0.0171436	0.0980788	0.861242	0.06487479918822683	Mean number of eggs in utero	4.342193628794542	0	NA	NA	NA	NA	NA	NA	NA	NA	NA
I	I:1096611	1096611	A	T	0.184713	0.0761455	0.089	0.392237	0.4064514414231779	Mean number of eggs in utero	4.342193628794542	0	NA	NA	NA	NA	NA	NA	NA	NA	NA
I	I:1099042	1099042	A	G	0.245223	0.052831	0.0822993	0.520914	0.2832339703825424	Mean number of eggs in utero	4.342193628794542	0	NA	NA	NA	NA	NA	NA	NA	NA	NA
I	I:1099355	1099355	G	A	0.292994	0.0500783	0.0847507	0.554595	0.25602405016060586	Mean number of eggs in utero	4.342193628794542	0	NA	NA	NA	NA	NA	NA	NA	NA	NA
I	I:1103626	1103626	A	C	0.0764331	0.0877046	0.134362	0.513919	0.28910532580067994	Mean number of eggs in utero	4.342193628794542	0	NA	NA	NA	NA	NA	NA	NA	NA	NA
I	I:1109928	1109928	G	A	0.184713	0.0180531	0.0867223	0.835095	0.07826411657753776	Mean number of eggs in utero	4.342193628794542	0	NA	NA	NA	NA	NA	NA	NA	NA	NA
I	I:1110623	1110623	G	A	0.111465	-0.0472241	0.105427	0.654203	0.18428746864812315	Mean number of eggs in utero	4.342193628794542	0	NA	NA	NA	NA	NA	NA	NA	NA	NA
I	I:1127333	1127333	A	T	0.0732484	0.158586	0.135772	0.242792	0.6147656273706459	Mean number of eggs in utero	4.342193628794542	0	NA	NA	NA	NA	NA	NA	NA	NA	NA
I	I:1128847	1128847	G	C	0.16242	-0.00311242	0.099546	0.975057	0.010969995520032165	Mean number of eggs in utero	4.342193628794542	0	NA	NA	NA	NA	NA	NA	NA	NA	NA
I	I:1128934	1128934	T	C	0.273885	0.0517748	0.0871658	0.552525	0.2576480667534158	Mean number of eggs in utero	4.342193628794542	0	NA	NA	NA	NA	NA	NA	NA	NA	NA
I	I:1129124	1129124	A	G	0.0923567	-0.0205242	0.114324	0.857524	0.06675371627445578	Mean number of eggs in utero	4.342193628794542	0	NA	NA	NA	NA	NA	NA	NA	NA	NA
I	I:1130709	1130709	A	T	0.0605096	0.0514646	0.147055	0.726362	0.13884688423090197	Mean number of eggs in utero	4.342193628794542	0	NA	NA	NA	NA	NA	NA	NA	NA	NA
I	I:1137920	1137920	A	C	0.267516	-0.0312948	0.0814211	0.700714	0.1544592053806832	Mean number of eggs in utero	4.342193628794542	0	NA	NA	NA	NA	NA	NA	NA	NA	NA
I	I:1138155	1138155	A	G	0.197452	-0.0157399	0.0861883	0.855094	0.0679861409006524	Mean number of eggs in utero	4.342193628794542	0	NA	NA	NA	NA	NA	NA	NA	NA	NA
I	I:1140126	1140126	G	A	0.0859873	-0.00967864	0.119227	0.9353	0.029049065654575875	Mean number of eggs in utero	4.342193628794542	0	NA	NA	NA	NA	NA	NA	NA	NA	NA
I	I:1140583	1140583	T	C	0.187898	0.0386575	0.0877295	0.659471	0.18080429764133282	Mean number of eggs in utero	4.342193628794542	0	NA	NA	NA	NA	NA	NA	NA	NA	NA
I	I:1141172	1141172	A	G	0.191083	0.041092	0.0824095	0.618039	0.20898411884260568	Mean number of eggs in utero	4.342193628794542	0	NA	NA	NA	NA	NA	NA	NA	NA	NA
I	I:1141367	1141367	A	C	0.066879	0.0538538	0.160762	0.737632	0.13216025095392944	Mean number of eggs in utero	4.342193628794542	0	NA	NA	NA	NA	NA	NA	NA	NA	NA
I	I:1146873	1146873	T	G	0.308917	0.0725683	0.0715846	0.310706	0.5076503600642034	Mean number of eggs in utero	4.342193628794542	0	NA	NA	NA	NA	NA	NA	NA	NA	NA
I	I:1149835	1149835	T	A	0.308917	0.0118852	0.0711626	0.867359	0.0618011107722204	Mean number of eggs in utero	4.342193628794542	0	NA	NA	NA	NA	NA	NA	NA	NA	NA
I	I:1156845	1156845	G	A	0.130573	0.00444766	0.111782	0.968261	0.014007560479587094	Mean number of eggs in utero	4.342193628794542	0	NA	NA	NA	NA	NA	NA	NA	NA	NA
I	I:1157239	1157239	A	T	0.477707	0.0397131	0.068968	0.564737	0.24815375756252894	Mean number of eggs in utero	4.342193628794542	0	NA	NA	NA	NA	NA	NA	NA	NA	NA
I	I:1157254	1157254	A	T	0.254777	0.0550988	0.0886334	0.534174	0.27231725433659654	Mean number of eggs in utero	4.342193628794542	0	NA	NA	NA	NA	NA	NA	NA	NA	NA
I	I:1158457	1158457	T	G	0.159236	-0.00412206	0.101186	0.967505	0.014346781898923367	Mean number of eggs in utero	4.342193628794542	0	NA	NA	NA	NA	NA	NA	NA	NA	NA
I	I:1159684	1159684	A	T	0.149682	0.0142415	0.0974597	0.883821	0.053635683611280134	Mean number of eggs in utero	4.342193628794542	0	NA	NA	NA	NA	NA	NA	NA	NA	NA
I	I:1159972	1159972	G	T	0.436306	0.0500224	0.0749235	0.504359	0.297260225028135	Mean number of eggs in utero	4.342193628794542	0	NA	NA	NA	NA	NA	NA	NA	NA	NA
I	I:1161838	1161838	G	A	0.0700637	0.0261989	0.128247	0.83813	0.07668861394266156	Mean number of eggs in utero	4.342193628794542	0	NA	NA	NA	NA	NA	NA	NA	NA	NA
I	I:1161993	1161993	A	C	0.484076	0.0424344	0.0719194	0.555172	0.2555724455649775	Mean number of eggs in utero	4.342193628794542	0	NA	NA	NA	NA	NA	NA	NA	NA	NA
I	I:1166270	1166270	T	C	0.0541401	0.157121	0.143308	0.27291	0.5639805505695659	Mean number of eggs in utero	4.342193628794542	0	NA	NA	NA	NA	NA	NA	NA	NA	NA
I	I:1166365	1166365	G	C	0.305732	0.0302787	0.0759576	0.690169	0.16104455160972034	Mean number of eggs in utero	4.342193628794542	0	NA	NA	NA	NA	NA	NA	NA	NA	NA
I	I:1168888	1168888	A	C	0.194268	0.0545718	0.0819709	0.505574	0.29621526848134944	Mean number of eggs in utero	4.342193628794542	0	NA	NA	NA	NA	NA	NA	NA	NA	NA
I	I:1169002	1169002	T	G	0.286624	-0.0240987	0.079958	0.763116	0.11740944064176907	Mean number of eggs in utero	4.342193628794542	0	NA	NA	NA	NA	NA	NA	NA	NA	NA
I	I:1171014	1171014	T	A	0.0764331	0.00392229	0.124291	0.974825	0.011073341589462998	Mean number of eggs in utero	4.342193628794542	0	NA	NA	NA	NA	NA	NA	NA	NA	NA
I	I:1171021	1171021	A	G	0.455414	0.0516666	0.0722877	0.474772	0.32351490177318687	Mean number of eggs in utero	4.342193628794542	0	NA	NA	NA	NA	NA	NA	NA	NA	NA
I	I:1178087	1178087	G	C	0.0541401	-0.0505569	0.227805	0.824368	0.08387887484181775	Mean number of eggs in utero	4.342193628794542	0	NA	NA	NA	NA	NA	NA	NA	NA	NA
I	I:1178132	1178132	G	A	0.315287	0.0115972	0.0781383	0.882012	0.05452550613991433	Mean number of eggs in utero	4.342193628794542	0	NA	NA	NA	NA	NA	NA	NA	NA	NA
I	I:1178358	1178358	T	C	0.0987261	0.0794019	0.120967	0.51157300000000006	0.2910923849526572	Mean number of eggs in utero	4.342193628794542	0	NA	NA	NA	NA	NA	NA	NA	NA	NA
I	I:1180491	1180491	T	A	0.238854	0.00438431	0.0874197	0.960001	0.017728314570581893	Mean number of eggs in utero	4.342193628794542	0	NA	NA	NA	NA	NA	NA	NA	NA	NA
I	I:1182911	1182911	C	A	0.0509554	-0.245936	0.242539	0.310579	0.5078279127170758	Mean number of eggs in utero	4.342193628794542	0	NA	NA	NA	NA	NA	NA	NA	NA	NA
I	I:1184704	1184704	A	C	0.0732484	0.0210154	0.152704	0.890539	0.050347056420938424	Mean number of eggs in utero	4.342193628794542	0	NA	NA	NA	NA	NA	NA	NA	NA	NA
I	I:1184715	1184715	T	C	0.0605096	0.119882	0.141238	0.395995	0.4023102976252918	Mean number of eggs in utero	4.342193628794542	0	NA	NA	NA	NA	NA	NA	NA	NA	NA
I	I:1184732	1184732	T	A	0.066879	0.0100938	0.152409	0.947196	0.023560144638887316	Mean number of eggs in utero	4.342193628794542	0	NA	NA	NA	NA	NA	NA	NA	NA	NA
I	I:1184934	1184934	C	T	0.0764331	0.0250579	0.124276	0.840205	0.07561473833486525	Mean number of eggs in utero	4.342193628794542	0	NA	NA	NA	NA	NA	NA	NA	NA	NA
I	I:1199350	1199350	T	A	0.0859873	0.0564953	0.137719	0.681643	0.16644302083278273	Mean number of eggs in utero	4.342193628794542	0	NA	NA	NA	NA	NA	NA	NA	NA	NA
I	I:1200305	1200305	C	T	0.0987261	0.286356	0.164104	0.08099	1.0915686010339936	Mean number of eggs in utero	4.342193628794542	0	NA	NA	NA	NA	NA	NA	NA	NA	NA
I	I:1207262	1207262	C	T	0.308917	-0.0412612	0.0830203	0.619188	0.2081774689664475	Mean number of eggs in utero	4.342193628794542	0	NA	NA	NA	NA	NA	NA	NA	NA	NA
I	I:1219286	1219286	T	A	0.0859873	0.192405	0.148248	0.194337	0.7114445058024439	Mean number of eggs in utero	4.342193628794542	0	NA	NA	NA	NA	NA	NA	NA	NA	NA
I	I:1219399	1219399	C	T	0.308917	-0.0412612	0.0830203	0.619188	0.2081774689664475	Mean number of eggs in utero	4.342193628794542	0	NA	NA	NA	NA	NA	NA	NA	NA	NA
I	I:1224025	1224025	A	G	0.0636943	0.181967	0.176359	0.302166	0.5197544044678615	Mean number of eggs in utero	4.342193628794542	0	NA	NA	NA	NA	NA	NA	NA	NA	NA
I	I:1228772	1228772	T	C	0.0955414	0.106961	0.111259	0.336368	0.4731853270371992	Mean number of eggs in utero	4.342193628794542	0	NA	NA	NA	NA	NA	NA	NA	NA	NA
I	I:1229336	1229336	G	T	0.175159	0.174683	0.105507	0.097794	1.009687789862973	Mean number of eggs in utero	4.342193628794542	0	NA	NA	NA	NA	NA	NA	NA	NA	NA
I	I:1229366	1229366	C	T	0.130573	0.111537	0.112574	0.321787	0.4924315051167507	Mean number of eggs in utero	4.342193628794542	0	NA	NA	NA	NA	NA	NA	NA	NA	NA
I	I:1229646	1229646	A	T	0.0573248	0.0887174	0.14409	0.538087	0.2691475002346153	Mean number of eggs in utero	4.342193628794542	0	NA	NA	NA	NA	NA	NA	NA	NA	NA
I	I:1232339	1232339	T	C	0.484076	0.0512171	0.072643	0.480778	0.3180554135036551	Mean number of eggs in utero	4.342193628794542	0	NA	NA	NA	NA	NA	NA	NA	NA	NA
I	I:1233659	1233659	T	C	0.0732484	-0.0322624	0.139935	0.817662	0.08742618516802489	Mean number of eggs in utero	4.342193628794542	0	NA	NA	NA	NA	NA	NA	NA	NA	NA
I	I:1247844	1247844	C	T	0.480892	-0.0715758	0.0745402	0.336939	0.47244871741152805	Mean number of eggs in utero	4.342193628794542	0	NA	NA	NA	NA	NA	NA	NA	NA	NA
I	I:1247991	1247991	G	T	0.0509554	-0.0928983	0.205895	0.651851	0.18585166388913357	Mean number of eggs in utero	4.342193628794542	0	NA	NA	NA	NA	NA	NA	NA	NA	NA
I	I:1248064	1248064	T	C	0.372611	-0.0724388	0.0739826	0.327515	0.48476880477739515	Mean number of eggs in utero	4.342193628794542	0	NA	NA	NA	NA	NA	NA	NA	NA	NA
I	I:1248756	1248756	A	G	0.0923567	-0.0906898	0.129985	0.485368	0.3139288598160637	Mean number of eggs in utero	4.342193628794542	0	NA	NA	NA	NA	NA	NA	NA	NA	NA
I	I:1251884	1251884	T	C	0.124204	-0.147849	0.110495	0.180879	0.7426118516781899	Mean number of eggs in utero	4.342193628794542	0	NA	NA	NA	NA	NA	NA	NA	NA	NA
I	I:1252221	1252221	A	G	0.0636943	-0.0523893	0.149003	0.725139	0.13957873667476492	Mean number of eggs in utero	4.342193628794542	0	NA	NA	NA	NA	NA	NA	NA	NA	NA
I	I:1255890	1255890	T	C	0.143312	0.0256471	0.123868	0.835969	0.07780982708079295	Mean number of eggs in utero	4.342193628794542	0	NA	NA	NA	NA	NA	NA	NA	NA	NA
I	I:1256240	1256240	G	A	0.248408	-0.080482	0.0943275	0.393538	0.40501332583728444	Mean number of eggs in utero	4.342193628794542	0	NA	NA	NA	NA	NA	NA	NA	NA	NA
I	I:1258563	1258563	C	G	0.101911	-0.0787862	0.106926	0.461224	0.3360881020790375	Mean number of eggs in utero	4.342193628794542	0	NA	NA	NA	NA	NA	NA	NA	NA	NA
I	I:1258706	1258706	G	A	0.305732	-0.0256427	0.0816997	0.753624	0.12284527940095827	Mean number of eggs in utero	4.342193628794542	0	NA	NA	NA	NA	NA	NA	NA	NA	NA
I	I:1260822	1260822	A	G	0.136943	0.0115681	0.108483	0.915078	0.03854188568675465	Mean number of eggs in utero	4.342193628794542	0	NA	NA	NA	NA	NA	NA	NA	NA	NA
I	I:1262797	1262797	C	T	0.477707	-0.0690866	0.0743446	0.352747	0.4525366710930646	Mean number of eggs in utero	4.342193628794542	0	NA	NA	NA	NA	NA	NA	NA	NA	NA
I	I:1265967	1265967	A	G	0.11465	-0.13399	0.116109	0.248497	0.6046788499540304	Mean number of eggs in utero	4.342193628794542	0	NA	NA	NA	NA	NA	NA	NA	NA	NA
I	I:1266023	1266023	T	A	0.0605096	0.0682141	0.253491	0.787854	0.10355425569455852	Mean number of eggs in utero	4.342193628794542	0	NA	NA	NA	NA	NA	NA	NA	NA	NA
I	I:1267574	1267574	G	A	0.261146	-0.0121765	0.0815538	0.881312	0.05487031645645497	Mean number of eggs in utero	4.342193628794542	0	NA	NA	NA	NA	NA	NA	NA	NA	NA
I	I:1269245	1269245	T	A	0.305732	0.0375107	0.0813746	0.644825	0.19055813318873846	Mean number of eggs in utero	4.342193628794542	0	NA	NA	NA	NA	NA	NA	NA	NA	NA
I	I:1269603	1269603	A	T	0.181529	-0.134584	0.0921116	0.14399	0.8416676682910191	Mean number of eggs in utero	4.342193628794542	0	NA	NA	NA	NA	NA	NA	NA	NA	NA
I	I:1274869	1274869	C	A	0.0636943	-0.192017	0.134766	0.154211	0.8118846465904144	Mean number of eggs in utero	4.342193628794542	0	NA	NA	NA	NA	NA	NA	NA	NA	NA
I	I:1277122	1277122	T	C	0.417197	-0.0842008	0.0725706	0.245943	0.6091655337659055	Mean number of eggs in utero	4.342193628794542	0	NA	NA	NA	NA	NA	NA	NA	NA	NA
I	I:1279436	1279436	C	T	0.0987261	-0.085285	0.123943	0.491389	0.30857456965644875	Mean number of eggs in utero	4.342193628794542	0	NA	NA	NA	NA	NA	NA	NA	NA	NA
I	I:1285276	1285276	T	A	0.0636943	0.162247	0.276338	0.557114	0.25405592779733194	Mean number of eggs in utero	4.342193628794542	0	NA	NA	NA	NA	NA	NA	NA	NA	NA
I	I:1285647	1285647	T	C	0.484076	-0.0783022	0.0743342	0.292167	0.5343688388029871	Mean number of eggs in utero	4.342193628794542	0	NA	NA	NA	NA	NA	NA	NA	NA	NA
I	I:1287916	1287916	C	A	0.232484	-0.161238	0.0963687	0.0943011	1.025483241290839	Mean number of eggs in utero	4.342193628794542	0	NA	NA	NA	NA	NA	NA	NA	NA	NA
I	I:1290298	1290298	T	C	0.248408	0.0152655	0.0844973	0.856632	0.06720570630666359	Mean number of eggs in utero	4.342193628794542	0	NA	NA	NA	NA	NA	NA	NA	NA	NA
I	I:1294186	1294186	T	C	0.0509554	-0.0517221	0.252142	0.83747	0.07703074138701554	Mean number of eggs in utero	4.342193628794542	0	NA	NA	NA	NA	NA	NA	NA	NA	NA
I	I:1305349	1305349	T	C	0.242038	-0.0325573	0.0861651	0.705544	0.15147589706010361	Mean number of eggs in utero	4.342193628794542	0	NA	NA	NA	NA	NA	NA	NA	NA	NA
I	I:1306367	1306367	T	A	0.366242	-0.0390812	0.0772599	0.612969	0.2125614887268903	Mean number of eggs in utero	4.342193628794542	0	NA	NA	NA	NA	NA	NA	NA	NA	NA
I	I:1311054	1311054	C	T	0.16242	0.0222152	0.105323	0.832946	0.07938315304963657	Mean number of eggs in utero	4.342193628794542	0	NA	NA	NA	NA	NA	NA	NA	NA	NA
I	I:1312071	1312071	A	G	0.477707	-0.0833064	0.0742863	0.262108	0.5815197234149678	Mean number of eggs in utero	4.342193628794542	0	NA	NA	NA	NA	NA	NA	NA	NA	NA
I	I:1312700	1312700	G	T	0.101911	0.0136059	0.111058	0.902493	0.044556157924424244	Mean number of eggs in utero	4.342193628794542	0	NA	NA	NA	NA	NA	NA	NA	NA	NA
I	I:1312794	1312794	T	C	0.0859873	-0.061892	0.137029	0.651505	0.18608224692902203	Mean number of eggs in utero	4.342193628794542	0	NA	NA	NA	NA	NA	NA	NA	NA	NA
I	I:1313313	1313313	A	G	0.299363	-0.0955634	0.0777422	0.218984	0.6595876155962151	Mean number of eggs in utero	4.342193628794542	0	NA	NA	NA	NA	NA	NA	NA	NA	NA
I	I:1326318	1326318	G	A	0.130573	0.00799926	0.102003	0.937492	0.02803242959563472	Mean number of eggs in utero	4.342193628794542	0	NA	NA	NA	NA	NA	NA	NA	NA	NA
I	I:1333076	1333076	T	C	0.0987261	-0.0779965	0.113367	0.491453	0.3085180095035837	Mean number of eggs in utero	4.342193628794542	0	NA	NA	NA	NA	NA	NA	NA	NA	NA
I	I:1336302	1336302	A	G	0.0955414	0.0764511	0.173042	0.658628	0.18135981023661074	Mean number of eggs in utero	4.342193628794542	0	NA	NA	NA	NA	NA	NA	NA	NA	NA
I	I:1338957	1338957	G	A	0.423567	-0.0951658	0.0714237	0.182725	0.7382020294439895	Mean number of eggs in utero	4.342193628794542	0	NA	NA	NA	NA	NA	NA	NA	NA	NA
I	I:1341202	1341202	A	C	0.0509554	-0.147156	0.294257	0.61701	0.2097077972153396	Mean number of eggs in utero	4.342193628794542	0	NA	NA	NA	NA	NA	NA	NA	NA	NA
I	I:1358450	1358450	A	T	0.207006	-0.0430723	0.0904489	0.633927	0.19796075051340986	Mean number of eggs in utero	4.342193628794542	0	NA	NA	NA	NA	NA	NA	NA	NA	NA
I	I:1359466	1359466	G	A	0.184713	-0.0559	0.0915624	0.541523	0.26638309294271406	Mean number of eggs in utero	4.342193628794542	0	NA	NA	NA	NA	NA	NA	NA	NA	NA
I	I:1367615	1367615	A	G	0.146497	0.0172296	0.103876	0.868262	0.06134920571628547	Mean number of eggs in utero	4.342193628794542	0	NA	NA	NA	NA	NA	NA	NA	NA	NA
I	I:1375324	1375324	G	A	0.0700637	-0.0382069	0.278655	0.890942	0.050150567455642114	Mean number of eggs in utero	4.342193628794542	0	NA	NA	NA	NA	NA	NA	NA	NA	NA
I	I:1392829	1392829	A	G	0.0509554	-0.1977	0.151482	0.191857	0.7170223507220446	Mean number of eggs in utero	4.342193628794542	0	NA	NA	NA	NA	NA	NA	NA	NA	NA
I	I:1392873	1392873	G	A	0.0796178	-0.0729237	0.15770700000000001	0.643795	0.19125240056255471	Mean number of eggs in utero	4.342193628794542	0	NA	NA	NA	NA	NA	NA	NA	NA	NA
I	I:1400428	1400428	G	A	0.267516	-0.096651	0.08464	0.253493	0.5960340288487807	Mean number of eggs in utero	4.342193628794542	0	NA	NA	NA	NA	NA	NA	NA	NA	NA
I	I:1402717	1402717	T	G	0.133758	-0.00944751	0.101293	0.92569	0.03353442782119287	Mean number of eggs in utero	4.342193628794542	0	NA	NA	NA	NA	NA	NA	NA	NA	NA
I	I:1404829	1404829	T	C	0.487261	-0.0379564	0.0734923	0.605528	0.21786577000343896	Mean number of eggs in utero	4.342193628794542	0	NA	NA	NA	NA	NA	NA	NA	NA	NA
I	I:1405469	1405469	G	C	0.066879	-0.0939742	0.24854	0.705353	0.15159348218013752	Mean number of eggs in utero	4.342193628794542	0	NA	NA	NA	NA	NA	NA	NA	NA	NA
I	I:1406148	1406148	T	G	0.0509554	-0.153319	0.154912	0.322313	0.49172217753325875	Mean number of eggs in utero	4.342193628794542	0	NA	NA	NA	NA	NA	NA	NA	NA	NA
I	I:1410049	1410049	T	C	0.0764331	-0.0374441	0.183479	0.838292	0.07660467838671285	Mean number of eggs in utero	4.342193628794542	0	NA	NA	NA	NA	NA	NA	NA	NA	NA
I	I:1410349	1410349	G	A	0.38535	-9.15232e-4	0.0735897	0.990077	0.004331028256285162	Mean number of eggs in utero	4.342193628794542	0	NA	NA	NA	NA	NA	NA	NA	NA	NA
I	I:1416044	1416044	C	T	0.229299	0.0265107	0.0910051	0.770814	0.11305040602030697	Mean number of eggs in utero	4.342193628794542	0	NA	NA	NA	NA	NA	NA	NA	NA	NA
I	I:1420566	1420566	G	A	0.0541401	0.209248	0.261498	0.423601	0.3730430233191105	Mean number of eggs in utero	4.342193628794542	0	NA	NA	NA	NA	NA	NA	NA	NA	NA
I	I:1435250	1435250	A	T	0.111465	0.131951	0.108933	0.225781	0.6463126077712898	Mean number of eggs in utero	4.342193628794542	0	NA	NA	NA	NA	NA	NA	NA	NA	NA
I	I:1445264	1445264	T	C	0.133758	0.131271	0.104708	0.209956	0.6778717098345292	Mean number of eggs in utero	4.342193628794542	0	NA	NA	NA	NA	NA	NA	NA	NA	NA
I	I:1447700	1447700	T	C	0.16242	0.229286	0.121104	0.0583181	1.2341966337462769	Mean number of eggs in utero	4.342193628794542	0	NA	NA	NA	NA	NA	NA	NA	NA	NA
I	I:1451070	1451070	C	T	0.0605096	-0.0834644	0.136225	0.540079	0.2675427091498908	Mean number of eggs in utero	4.342193628794542	0	NA	NA	NA	NA	NA	NA	NA	NA	NA
I	I:1460652	1460652	A	G	0.127389	-0.0288431	0.11359	0.799555	0.09715165652695118	Mean number of eggs in utero	4.342193628794542	0	NA	NA	NA	NA	NA	NA	NA	NA	NA
I	I:1466324	1466324	G	A	0.11465	0.188898	0.116821	0.105882	0.9751778639256536	Mean number of eggs in utero	4.342193628794542	0	NA	NA	NA	NA	NA	NA	NA	NA	NA
I	I:1466443	1466443	A	G	0.458599	-0.0231536	0.0681832	0.734174	0.13420099964198598	Mean number of eggs in utero	4.342193628794542	0	NA	NA	NA	NA	NA	NA	NA	NA	NA
I	I:1466639	1466639	A	G	0.0541401	-0.128822	0.21675	0.55229	0.25783282022759285	Mean number of eggs in utero	4.342193628794542	0	NA	NA	NA	NA	NA	NA	NA	NA	NA
I	I:1471432	1471432	A	T	0.219745	0.0398008	0.0960743	0.678675	0.16833814839512326	Mean number of eggs in utero	4.342193628794542	0	NA	NA	NA	NA	NA	NA	NA	NA	NA
I	I:1476055	1476055	A	G	0.0955414	0.058206	0.116776	0.618172	0.20889067012500645	Mean number of eggs in utero	4.342193628794542	0	NA	NA	NA	NA	NA	NA	NA	NA	NA
I	I:1476121	1476121	G	A	0.0828025	-0.111669	0.152757	0.464763	0.3327684536285682	Mean number of eggs in utero	4.342193628794542	0	NA	NA	NA	NA	NA	NA	NA	NA	NA
I	I:1476240	1476240	T	G	0.496815	0.0176596	0.0694921	0.7994	0.09723585607591391	Mean number of eggs in utero	4.342193628794542	0	NA	NA	NA	NA	NA	NA	NA	NA	NA
I	I:1478424	1478424	A	T	0.133758	0.0552816	0.112482	0.623093	0.20544712770278892	Mean number of eggs in utero	4.342193628794542	0	NA	NA	NA	NA	NA	NA	NA	NA	NA
I	I:1480815	1480815	A	C	0.0509554	-0.178157	0.150279	0.235818	0.6274230482556914	Mean number of eggs in utero	4.342193628794542	0	NA	NA	NA	NA	NA	NA	NA	NA	NA
I	I:1484843	1484843	A	G	0.426752	-0.0220195	0.0763166	0.772943	0.11185253156447708	Mean number of eggs in utero	4.342193628794542	0	NA	NA	NA	NA	NA	NA	NA	NA	NA
I	I:1486538	1486538	T	A	0.0764331	0.170562	0.25824	0.508946	0.2933282945711416	Mean number of eggs in utero	4.342193628794542	0	NA	NA	NA	NA	NA	NA	NA	NA	NA
I	I:1486763	1486763	A	T	0.0859873	0.0065533	0.115077	0.954587	0.020184484349314247	Mean number of eggs in utero	4.342193628794542	0	NA	NA	NA	NA	NA	NA	NA	NA	NA
I	I:1486849	1486849	T	C	0.0987261	-0.147641	0.139206	0.288874	0.5392915449147679	Mean number of eggs in utero	4.342193628794542	0	NA	NA	NA	NA	NA	NA	NA	NA	NA
I	I:1486876	1486876	A	G	0.0764331	-0.0350245	0.135569	0.796136	0.09901273753313385	Mean number of eggs in utero	4.342193628794542	0	NA	NA	NA	NA	NA	NA	NA	NA	NA
I	I:1487987	1487987	C	G	0.105096	-0.083692	0.107129	0.434671	0.3618393337224402	Mean number of eggs in utero	4.342193628794542	0	NA	NA	NA	NA	NA	NA	NA	NA	NA
I	I:1489001	1489001	C	G	0.127389	-0.0288431	0.11359	0.799555	0.09715165652695118	Mean number of eggs in utero	4.342193628794542	0	NA	NA	NA	NA	NA	NA	NA	NA	NA
I	I:1489320	1489320	A	G	0.490446	-0.0395086	0.0697297	0.570988	0.243373018879451	Mean number of eggs in utero	4.342193628794542	0	NA	NA	NA	NA	NA	NA	NA	NA	NA
I	I:1493923	1493923	A	G	0.089172	0.0760896	0.120524	0.527829	0.27750675243733325	Mean number of eggs in utero	4.342193628794542	0	NA	NA	NA	NA	NA	NA	NA	NA	NA
I	I:1498938	1498938	T	C	0.480892	-0.00514511	0.0700444	0.941444	0.026205508057620435	Mean number of eggs in utero	4.342193628794542	0	NA	NA	NA	NA	NA	NA	NA	NA	NA
I	I:1501105	1501105	A	G	0.436306	-5.04658e-4	0.0711958	0.994344	0.00246334250782453	Mean number of eggs in utero	4.342193628794542	0	NA	NA	NA	NA	NA	NA	NA	NA	NA
I	I:1503260	1503260	C	T	0.0859873	7.6666e-4	0.136054	0.99550400000000006	0.001956990609512292	Mean number of eggs in utero	4.342193628794542	0	NA	NA	NA	NA	NA	NA	NA	NA	NA
I	I:1510450	1510450	G	A	0.375796	-0.0348669	0.0776305	0.653331	0.1848667344176772	Mean number of eggs in utero	4.342193628794542	0	NA	NA	NA	NA	NA	NA	NA	NA	NA
I	I:1510599	1510599	G	A	0.0509554	-0.0434398	0.151032	0.773637	0.11146276783978015	Mean number of eggs in utero	4.342193628794542	0	NA	NA	NA	NA	NA	NA	NA	NA	NA
I	I:1512355	1512355	G	A	0.471338	-0.00312265	0.0710621	0.96495	0.015495189543950674	Mean number of eggs in utero	4.342193628794542	0	NA	NA	NA	NA	NA	NA	NA	NA	NA
I	I:1514332	1514332	G	A	0.105096	0.136607	0.11905	0.251184	0.6000080278847475	Mean number of eggs in utero	4.342193628794542	0	NA	NA	NA	NA	NA	NA	NA	NA	NA
I	I:1537385	1537385	C	T	0.490446	-0.0757909	0.0754452	0.315098	0.5015543533849351	Mean number of eggs in utero	4.342193628794542	0	NA	NA	NA	NA	NA	NA	NA	NA	NA
I	I:1537976	1537976	T	C	0.0955414	0.199103	0.123535	0.107024	0.9705188213914419	Mean number of eggs in utero	4.342193628794542	0	NA	NA	NA	NA	NA	NA	NA	NA	NA
I	I:1538131	1538131	T	C	0.0573248	-0.041264	0.400272	0.917892	0.03720841527295064	Mean number of eggs in utero	4.342193628794542	0	NA	NA	NA	NA	NA	NA	NA	NA	NA
I	I:1538229	1538229	T	A	0.152866	0.182603	0.119491	0.126469	0.8980159154276175	Mean number of eggs in utero	4.342193628794542	0	NA	NA	NA	NA	NA	NA	NA	NA	NA
I	I:1545531	1545531	A	T	0.496815	0.0161415	0.0710547	0.820292	0.08603152393945585	Mean number of eggs in utero	4.342193628794542	0	NA	NA	NA	NA	NA	NA	NA	NA	NA
I	I:1545548	1545548	C	A	0.420382	0.00986692	0.0716099	0.890409	0.050410458926511505	Mean number of eggs in utero	4.342193628794542	0	NA	NA	NA	NA	NA	NA	NA	NA	NA
I	I:1548566	1548566	G	A	0.366242	-0.0354133	0.0715306	0.620544	0.20722741919390184	Mean number of eggs in utero	4.342193628794542	0	NA	NA	NA	NA	NA	NA	NA	NA	NA
I	I:1549172	1549172	T	C	0.130573	0.313289	0.130037	0.0159861	1.796257474656999	Mean number of eggs in utero	4.342193628794542	0	NA	NA	NA	NA	NA	NA	NA	NA	NA
I	I:1549341	1549341	A	C	0.407643	-0.0848186	0.0751825	0.259248	0.5862845853432193	Mean number of eggs in utero	4.342193628794542	0	NA	NA	NA	NA	NA	NA	NA	NA	NA
I	I:1552914	1552914	G	T	0.0700637	0.304409	0.12883	0.018134	1.7415063886060875	Mean number of eggs in utero	4.342193628794542	0	NA	NA	NA	NA	NA	NA	NA	NA	NA
I	I:1554725	1554725	A	T	0.490446	-0.0442912	0.0737447	0.548105	0.26113623612793657	Mean number of eggs in utero	4.342193628794542	0	NA	NA	NA	NA	NA	NA	NA	NA	NA
I	I:1557902	1557902	C	A	0.0859873	-0.0551926	0.134471	0.68148	0.166546885268916	Mean number of eggs in utero	4.342193628794542	0	NA	NA	NA	NA	NA	NA	NA	NA	NA
I	I:1557984	1557984	T	C	0.0796178	-0.12991	0.125159	0.299288	0.5239106959171093	Mean number of eggs in utero	4.342193628794542	0	NA	NA	NA	NA	NA	NA	NA	NA	NA
I	I:1558209	1558209	T	A	0.0509554	-0.120761	0.15781	0.444135	0.3524850009584524	Mean number of eggs in utero	4.342193628794542	0	NA	NA	NA	NA	NA	NA	NA	NA	NA
I	I:1564135	1564135	C	T	0.101911	0.23784	0.128681	0.0645592	1.1900418599114224	Mean number of eggs in utero	4.342193628794542	0	NA	NA	NA	NA	NA	NA	NA	NA	NA
I	I:1570291	1570291	C	T	0.0636943	0.285571	0.133608	0.032567	1.487222245839586	Mean number of eggs in utero	4.342193628794542	0	NA	NA	NA	NA	NA	NA	NA	NA	NA
I	I:1580947	1580947	G	A	0.0605096	0.205555	0.134606	0.126741	0.8970828705675049	Mean number of eggs in utero	4.342193628794542	0	NA	NA	NA	NA	NA	NA	NA	NA	NA
I	I:1581701	1581701	A	T	0.0573248	-0.036533499999999997	0.142346	0.797446	0.09829871604011231	Mean number of eggs in utero	4.342193628794542	0	NA	NA	NA	NA	NA	NA	NA	NA	NA
I	I:1582461	1582461	A	G	0.146497	0.101024	0.114724	0.378546	0.42188133853562126	Mean number of eggs in utero	4.342193628794542	0	NA	NA	NA	NA	NA	NA	NA	NA	NA
I	I:1583155	1583155	A	G	0.474522	-0.01703	0.0718204	0.812564	0.09014242265406043	Mean number of eggs in utero	4.342193628794542	0	NA	NA	NA	NA	NA	NA	NA	NA	NA
I	I:1585346	1585346	A	G	0.124204	0.0129428	0.111657	0.907719	0.04204857398635032	Mean number of eggs in utero	4.342193628794542	0	NA	NA	NA	NA	NA	NA	NA	NA	NA
I	I:1586350	1586350	C	T	0.089172	0.0878793	0.123489	0.47669	0.32176395860447016	Mean number of eggs in utero	4.342193628794542	0	NA	NA	NA	NA	NA	NA	NA	NA	NA
I	I:1586612	1586612	A	G	0.0636943	0.0188567	0.135702	0.889484	0.05086185958028843	Mean number of eggs in utero	4.342193628794542	0	NA	NA	NA	NA	NA	NA	NA	NA	NA
I	I:1588561	1588561	G	A	0.487261	0.0221824	0.0748298	0.766896	0.11526352743112192	Mean number of eggs in utero	4.342193628794542	0	NA	NA	NA	NA	NA	NA	NA	NA	NA
I	I:1588843	1588843	A	G	0.0700637	0.0619547	0.129816	0.633184	0.19847006790870825	Mean number of eggs in utero	4.342193628794542	0	NA	NA	NA	NA	NA	NA	NA	NA	NA
I	I:1588855	1588855	G	A	0.455414	0.00483224	0.0726994	0.947005	0.023647728001291494	Mean number of eggs in utero	4.342193628794542	0	NA	NA	NA	NA	NA	NA	NA	NA	NA
I	I:1588888	1588888	G	A	0.398089	0.0269306	0.0772901	0.727514	0.13815864486543036	Mean number of eggs in utero	4.342193628794542	0	NA	NA	NA	NA	NA	NA	NA	NA	NA
I	I:1592014	1592014	C	T	0.404459	-0.00697845	0.0719908	0.922778	0.03490276806565522	Mean number of eggs in utero	4.342193628794542	0	NA	NA	NA	NA	NA	NA	NA	NA	NA
I	I:1592181	1592181	T	C	0.066879	-0.103997	0.136885	0.447412	0.34929237190703966	Mean number of eggs in utero	4.342193628794542	0	NA	NA	NA	NA	NA	NA	NA	NA	NA
I	I:1592712	1592712	A	C	0.0764331	0.033033	0.125421	0.79226	0.10113227038643395	Mean number of eggs in utero	4.342193628794542	0	NA	NA	NA	NA	NA	NA	NA	NA	NA
I	I:1594392	1594392	G	A	0.133758	0.141861	0.0998865	0.155543	0.8081495289447295	Mean number of eggs in utero	4.342193628794542	0	NA	NA	NA	NA	NA	NA	NA	NA	NA
I	I:1597967	1597967	T	G	0.0573248	0.374857	0.143681	0.00908189	2.041823762585054	Mean number of eggs in utero	4.342193628794542	0	NA	NA	NA	NA	NA	NA	NA	NA	NA
I	I:1598497	1598497	C	A	0.484076	-0.0370056	0.0722965	0.60875	0.21556102577730923	Mean number of eggs in utero	4.342193628794542	0	NA	NA	NA	NA	NA	NA	NA	NA	NA
I	I:1601130	1601130	T	A	0.404459	-0.0699944	0.0762368	0.358557	0.4454417944795188	Mean number of eggs in utero	4.342193628794542	0	NA	NA	NA	NA	NA	NA	NA	NA	NA
I	I:1604842	1604842	A	G	0.140127	-0.0516748	0.110164	0.639018	0.19448690836652396	Mean number of eggs in utero	4.342193628794542	0	NA	NA	NA	NA	NA	NA	NA	NA	NA
I	I:1610723	1610723	G	A	0.165605	0.127549	0.0931205	0.170774	0.767578249080573	Mean number of eggs in utero	4.342193628794542	0	NA	NA	NA	NA	NA	NA	NA	NA	NA
I	I:1622740	1622740	T	A	0.449045	0.0287554	0.0750041	0.701435	0.1540125676138689	Mean number of eggs in utero	4.342193628794542	0	NA	NA	NA	NA	NA	NA	NA	NA	NA
I	I:1625311	1625311	A	T	0.0923567	0.0232485	0.130221	0.858306	0.0663578515228629	Mean number of eggs in utero	4.342193628794542	0	NA	NA	NA	NA	NA	NA	NA	NA	NA
I	I:1635216	1635216	A	G	0.401274	-0.0833385	0.0771131	0.279817	0.5531259039188364	Mean number of eggs in utero	4.342193628794542	0	NA	NA	NA	NA	NA	NA	NA	NA	NA
I	I:1638691	1638691	A	C	0.487261	-0.0763581	0.0769471	0.321029	0.49345573404030796	Mean number of eggs in utero	4.342193628794542	0	NA	NA	NA	NA	NA	NA	NA	NA	NA
I	I:1649426	1649426	T	C	0.0636943	0.00336527	0.13623	0.980292	0.008644541552636274	Mean number of eggs in utero	4.342193628794542	0	NA	NA	NA	NA	NA	NA	NA	NA	NA
I	I:1651849	1651849	G	T	0.468153	-0.0792241	0.0710913	0.265108	0.5765771666334363	Mean number of eggs in utero	4.342193628794542	0	NA	NA	NA	NA	NA	NA	NA	NA	NA
I	I:1654361	1654361	C	T	0.130573	-0.12413	0.118129	0.29335	0.5326139074476495	Mean number of eggs in utero	4.342193628794542	0	NA	NA	NA	NA	NA	NA	NA	NA	NA
I	I:1656062	1656062	A	G	0.178344	-0.0749978	0.0908405	0.409032	0.38824271429147295	Mean number of eggs in utero	4.342193628794542	0	NA	NA	NA	NA	NA	NA	NA	NA	NA
I	I:1657013	1657013	A	G	0.121019	-0.0668526	0.109389	0.541104	0.2667192556229408	Mean number of eggs in utero	4.342193628794542	0	NA	NA	NA	NA	NA	NA	NA	NA	NA
I	I:1657783	1657783	C	A	0.0859873	0.0207254	0.136127	0.878989	0.05601655981723253	Mean number of eggs in utero	4.342193628794542	0	NA	NA	NA	NA	NA	NA	NA	NA	NA
I	I:1657899	1657899	C	T	0.305732	0.00893975	0.0822079	0.913404	0.03933709085237723	Mean number of eggs in utero	4.342193628794542	0	NA	NA	NA	NA	NA	NA	NA	NA	NA
I	I:1664344	1664344	T	C	0.136943	-0.00421266	0.0932119	0.963952	0.01594459125706496	Mean number of eggs in utero	4.342193628794542	0	NA	NA	NA	NA	NA	NA	NA	NA	NA
I	I:1667205	1667205	A	G	0.0796178	-0.0377568	0.12466000000000001	0.761982	0.11805528770633915	Mean number of eggs in utero	4.342193628794542	0	NA	NA	NA	NA	NA	NA	NA	NA	NA
I	I:1673170	1673170	C	T	0.273885	-0.0450775	0.0892957	0.613691	0.2120502457546829	Mean number of eggs in utero	4.342193628794542	0	NA	NA	NA	NA	NA	NA	NA	NA	NA
I	I:1673864	1673864	T	C	0.140127	0.0204632	0.124313	0.86925	0.06085530064470398	Mean number of eggs in utero	4.342193628794542	0	NA	NA	NA	NA	NA	NA	NA	NA	NA
I	I:1677771	1677771	T	C	0.184713	-0.0192393	0.100151	0.847661	0.07177779781995443	Mean number of eggs in utero	4.342193628794542	0	NA	NA	NA	NA	NA	NA	NA	NA	NA
I	I:1678965	1678965	T	C	0.0955414	0.080491	0.106736	0.45078	0.34603536077659874	Mean number of eggs in utero	4.342193628794542	0	NA	NA	NA	NA	NA	NA	NA	NA	NA
I	I:1679070	1679070	C	T	0.44586	0.0307588	0.0731901	0.674297	0.17114877252911997	Mean number of eggs in utero	4.342193628794542	0	NA	NA	NA	NA	NA	NA	NA	NA	NA
I	I:1681731	1681731	A	T	0.207006	-0.061683	0.0980894	0.529451	0.2761742270849587	Mean number of eggs in utero	4.342193628794542	0	NA	NA	NA	NA	NA	NA	NA	NA	NA
I	I:1682992	1682992	G	A	0.0605096	0.145854	0.211349	0.490124	0.3096940307818668	Mean number of eggs in utero	4.342193628794542	0	NA	NA	NA	NA	NA	NA	NA	NA	NA
I	I:1688010	1688010	A	G	0.0509554	-0.0973446	0.151912	0.521656	0.28261579307074475	Mean number of eggs in utero	4.342193628794542	0	NA	NA	NA	NA	NA	NA	NA	NA	NA
I	I:1689321	1689321	T	C	0.089172	-0.1177	0.14737	0.424481	0.37214174424176316	Mean number of eggs in utero	4.342193628794542	0	NA	NA	NA	NA	NA	NA	NA	NA	NA
I	I:1691867	1691867	C	A	0.0509554	-0.234775	0.14826	0.1133	0.9457700901366027	Mean number of eggs in utero	4.342193628794542	0	NA	NA	NA	NA	NA	NA	NA	NA	NA
I	I:1693647	1693647	T	G	0.117834	-0.068829	0.107291	0.521188	0.2830055921800561	Mean number of eggs in utero	4.342193628794542	0	NA	NA	NA	NA	NA	NA	NA	NA	NA
I	I:1695463	1695463	A	G	0.226115	-0.0169089	0.0857124	0.843612	0.07385725124559434	Mean number of eggs in utero	4.342193628794542	0	NA	NA	NA	NA	NA	NA	NA	NA	NA
I	I:1696409	1696409	A	T	0.124204	0.00943688	0.0977611	0.9231	0.03475124903287911	Mean number of eggs in utero	4.342193628794542	0	NA	NA	NA	NA	NA	NA	NA	NA	NA
I	I:1697969	1697969	C	T	0.149682	-0.0324582	0.103758	0.754412	0.1223914121419712	Mean number of eggs in utero	4.342193628794542	0	NA	NA	NA	NA	NA	NA	NA	NA	NA
I	I:1698158	1698158	T	C	0.429936	0.0788529	0.0765708	0.303102	0.5184111979573591	Mean number of eggs in utero	4.342193628794542	0	NA	NA	NA	NA	NA	NA	NA	NA	NA
I	I:1700479	1700479	C	T	0.22293	-0.0462522	0.0863492	0.592207	0.22752646347254502	Mean number of eggs in utero	4.342193628794542	0	NA	NA	NA	NA	NA	NA	NA	NA	NA
I	I:1704244	1704244	A	C	0.16879	-0.0270468	0.0954492	0.776899	0.10963543756173737	Mean number of eggs in utero	4.342193628794542	0	NA	NA	NA	NA	NA	NA	NA	NA	NA
I	I:1715240	1715240	G	T	0.0700637	-0.121137	0.137486	0.37827	0.4221981005552381	Mean number of eggs in utero	4.342193628794542	0	NA	NA	NA	NA	NA	NA	NA	NA	NA
I	I:1718739	1718739	T	C	0.203822	0.0721543	0.0825755	0.382229	0.41767636578392453	Mean number of eggs in utero	4.342193628794542	0	NA	NA	NA	NA	NA	NA	NA	NA	NA
I	I:1718986	1718986	A	T	0.0764331	-0.118319	0.127582	0.353724	0.4513354725178533	Mean number of eggs in utero	4.342193628794542	0	NA	NA	NA	NA	NA	NA	NA	NA	NA
I	I:1719434	1719434	A	T	0.0796178	-0.101655	0.125563	0.418176	0.37864089587669425	Mean number of eggs in utero	4.342193628794542	0	NA	NA	NA	NA	NA	NA	NA	NA	NA
I	I:1719435	1719435	A	T	0.464968	-0.107049	0.0697262	0.124715	0.9040813089476434	Mean number of eggs in utero	4.342193628794542	0	NA	NA	NA	NA	NA	NA	NA	NA	NA
I	I:1721466	1721466	A	T	0.127389	-0.0706243	0.111309	0.525764	0.2792091541303804	Mean number of eggs in utero	4.342193628794542	0	NA	NA	NA	NA	NA	NA	NA	NA	NA
I	I:1721502	1721502	C	T	0.16242	-0.018019	0.0989562	0.855512	0.06777389436691082	Mean number of eggs in utero	4.342193628794542	0	NA	NA	NA	NA	NA	NA	NA	NA	NA
I	I:1726395	1726395	T	C	0.0796178	-0.090409	0.12385	0.465399	0.3321745542141975	Mean number of eggs in utero	4.342193628794542	0	NA	NA	NA	NA	NA	NA	NA	NA	NA
I	I:1727192	1727192	G	T	0.130573	-0.0263983	0.122555	0.829456	0.08120664696816718	Mean number of eggs in utero	4.342193628794542	0	NA	NA	NA	NA	NA	NA	NA	NA	NA
I	I:1729328	1729328	A	G	0.0700637	-0.0476213	0.133953	0.722209	0.1413371037989974	Mean number of eggs in utero	4.342193628794542	0	NA	NA	NA	NA	NA	NA	NA	NA	NA
I	I:1731008	1731008	T	A	0.0541401	-0.0178643	0.156732	0.909254	0.04131477971608082	Mean number of eggs in utero	4.342193628794542	0	NA	NA	NA	NA	NA	NA	NA	NA	NA
I	I:1732348	1732348	T	C	0.248408	-0.0376775	0.0898102	0.674833	0.17080368813466176	Mean number of eggs in utero	4.342193628794542	0	NA	NA	NA	NA	NA	NA	NA	NA	NA
I	I:1734383	1734383	A	C	0.178344	-0.079578	0.0946021	0.400244	0.39767516980572115	Mean number of eggs in utero	4.342193628794542	0	NA	NA	NA	NA	NA	NA	NA	NA	NA
I	I:1734927	1734927	A	T	0.152866	-0.0341746	0.0975634	0.726128	0.13898681622305964	Mean number of eggs in utero	4.342193628794542	0	NA	NA	NA	NA	NA	NA	NA	NA	NA
I	I:1739301	1739301	T	A	0.149682	0.0425751	0.0957549	0.656591	0.18270507451122522	Mean number of eggs in utero	4.342193628794542	0	NA	NA	NA	NA	NA	NA	NA	NA	NA
I	I:1746038	1746038	G	A	0.200637	0.0201386	0.0876275	0.818231	0.08712407057964011	Mean number of eggs in utero	4.342193628794542	0	NA	NA	NA	NA	NA	NA	NA	NA	NA
I	I:1748330	1748330	T	C	0.280255	-0.0813115	0.07917	0.304397	0.5165596320915634	Mean number of eggs in utero	4.342193628794542	0	NA	NA	NA	NA	NA	NA	NA	NA	NA
I	I:1748522	1748522	A	G	0.219745	0.00572897	0.0845792	0.945997	0.024110240855619084	Mean number of eggs in utero	4.342193628794542	0	NA	NA	NA	NA	NA	NA	NA	NA	NA
I	I:1751570	1751570	A	G	0.101911	0.114199	0.104286	0.273493	0.5630537848708718	Mean number of eggs in utero	4.342193628794542	0	NA	NA	NA	NA	NA	NA	NA	NA	NA
I	I:1762305	1762305	A	G	0.10828	-0.0920497	0.108395	0.395768	0.40255932378613335	Mean number of eggs in utero	4.342193628794542	0	NA	NA	NA	NA	NA	NA	NA	NA	NA
I	I:1763622	1763622	C	T	0.0700637	0.143592	0.154608	0.35302	0.45220068938954805	Mean number of eggs in utero	4.342193628794542	0	NA	NA	NA	NA	NA	NA	NA	NA	NA
I	I:1768295	1768295	G	A	0.0764331	-0.102619	0.128786	0.425555	0.3710443024351478	Mean number of eggs in utero	4.342193628794542	0	NA	NA	NA	NA	NA	NA	NA	NA	NA
I	I:1773355	1773355	A	G	0.066879	-0.134283	0.137742	0.329616	0.4819917152302074	Mean number of eggs in utero	4.342193628794542	0	NA	NA	NA	NA	NA	NA	NA	NA	NA
I	I:1775350	1775350	G	T	0.140127	-0.126695	0.124548	0.309041	0.5099838995636656	Mean number of eggs in utero	4.342193628794542	0	NA	NA	NA	NA	NA	NA	NA	NA	NA
I	I:1775399	1775399	A	C	0.490446	-0.0611926	0.0760868	0.421254	0.3754559622756674	Mean number of eggs in utero	4.342193628794542	0	NA	NA	NA	NA	NA	NA	NA	NA	NA
I	I:1777085	1777085	C	T	0.289809	-0.0326812	0.0799648	0.682763	0.16573002202013631	Mean number of eggs in utero	4.342193628794542	0	NA	NA	NA	NA	NA	NA	NA	NA	NA
I	I:1778576	1778576	C	A	0.191083	0.129794	0.0937347	0.166147	0.7795074960657292	Mean number of eggs in utero	4.342193628794542	0	NA	NA	NA	NA	NA	NA	NA	NA	NA
I	I:1780496	1780496	T	G	0.181529	-0.0366766	0.0961679	0.70292	0.15309409963960155	Mean number of eggs in utero	4.342193628794542	0	NA	NA	NA	NA	NA	NA	NA	NA	NA
I	I:1785437	1785437	C	T	0.315287	-0.103501	0.0756451	0.171236	0.7664049256532931	Mean number of eggs in utero	4.342193628794542	0	NA	NA	NA	NA	NA	NA	NA	NA	NA
I	I:1790278	1790278	A	G	0.44586	0.105872	0.0759071	0.163091	0.7875700043685682	Mean number of eggs in utero	4.342193628794542	0	NA	NA	NA	NA	NA	NA	NA	NA	NA
I	I:1791536	1791536	T	A	0.121019	-0.0125057	0.115583	0.913839	0.03913031145500443	Mean number of eggs in utero	4.342193628794542	0	NA	NA	NA	NA	NA	NA	NA	NA	NA
I	I:1792401	1792401	C	A	0.101911	-0.15229	0.125127	0.223572	0.650582588115363	Mean number of eggs in utero	4.342193628794542	0	NA	NA	NA	NA	NA	NA	NA	NA	NA
I	I:1794822	1794822	A	G	0.257962	-0.0677191	0.0822161	0.410126	0.3870826976751981	Mean number of eggs in utero	4.342193628794542	0	NA	NA	NA	NA	NA	NA	NA	NA	NA
I	I:1795635	1795635	T	C	0.296178	-0.0823947	0.0784416	0.293536	0.5323386281724971	Mean number of eggs in utero	4.342193628794542	0	NA	NA	NA	NA	NA	NA	NA	NA	NA
I	I:1800531	1800531	T	A	0.0796178	-0.0870066	0.124171	0.483489	0.31561340222967593	Mean number of eggs in utero	4.342193628794542	0	NA	NA	NA	NA	NA	NA	NA	NA	NA
I	I:1803069	1803069	C	G	0.394904	-0.12997	0.0742385	0.0799963	1.0969300995923503	Mean number of eggs in utero	4.342193628794542	0	NA	NA	NA	NA	NA	NA	NA	NA	NA
I	I:1804162	1804162	A	G	0.471338	-0.117064	0.072967	0.108639	0.964014240637954	Mean number of eggs in utero	4.342193628794542	0	NA	NA	NA	NA	NA	NA	NA	NA	NA
I	I:1806844	1806844	T	C	0.143312	-0.0832513	0.0970621	0.391051	0.4077665991918533	Mean number of eggs in utero	4.342193628794542	0	NA	NA	NA	NA	NA	NA	NA	NA	NA
I	I:1806906	1806906	T	C	0.257962	-0.063422	0.0901718	0.48184	0.31709714983747594	Mean number of eggs in utero	4.342193628794542	0	NA	NA	NA	NA	NA	NA	NA	NA	NA
I	I:1809996	1809996	T	A	0.410828	-0.101462	0.0761562	0.182766	0.7381045929881931	Mean number of eggs in utero	4.342193628794542	0	NA	NA	NA	NA	NA	NA	NA	NA	NA
I	I:1810726	1810726	C	T	0.264331	-0.0756199	0.0848624	0.372882	0.4284285806755716	Mean number of eggs in utero	4.342193628794542	0	NA	NA	NA	NA	NA	NA	NA	NA	NA
I	I:1811043	1811043	G	A	0.197452	-0.0530457	0.0916454	0.562715	0.2497115079304181	Mean number of eggs in utero	4.342193628794542	0	NA	NA	NA	NA	NA	NA	NA	NA	NA
I	I:1811283	1811283	G	A	0.296178	-0.036615	0.0825033	0.657187	0.18231103605271728	Mean number of eggs in utero	4.342193628794542	0	NA	NA	NA	NA	NA	NA	NA	NA	NA
I	I:1818743	1818743	A	C	0.0541401	0.0270584	0.157441	0.863544	0.06371552900518732	Mean number of eggs in utero	4.342193628794542	0	NA	NA	NA	NA	NA	NA	NA	NA	NA
I	I:1819127	1819127	A	G	0.0796178	-0.128389	0.124067	0.300747	0.5217986961242571	Mean number of eggs in utero	4.342193628794542	0	NA	NA	NA	NA	NA	NA	NA	NA	NA
I	I:1819339	1819339	G	A	0.312102	-0.0561953	0.0777147	0.46962	0.32825341579647316	Mean number of eggs in utero	4.342193628794542	0	NA	NA	NA	NA	NA	NA	NA	NA	NA
I	I:1819404	1819404	T	C	0.398089	-0.0359636	0.077132	0.64103	0.1931216451620255	Mean number of eggs in utero	4.342193628794542	0	NA	NA	NA	NA	NA	NA	NA	NA	NA
I	I:1820122	1820122	A	G	0.436306	0.0623077	0.0781456	0.42526	0.3713454651492407	Mean number of eggs in utero	4.342193628794542	0	NA	NA	NA	NA	NA	NA	NA	NA	NA
I	I:1820185	1820185	A	C	0.124204	0.00373306	0.113634	0.973793	0.01153335165529173	Mean number of eggs in utero	4.342193628794542	0	NA	NA	NA	NA	NA	NA	NA	NA	NA
I	I:1822641	1822641	T	G	0.0509554	0.110263	0.163169	0.499193	0.3017315132348633	Mean number of eggs in utero	4.342193628794542	0	NA	NA	NA	NA	NA	NA	NA	NA	NA
I	I:1823335	1823335	C	T	0.490446	-0.065207	0.0769036	0.396491	0.4017666663405723	Mean number of eggs in utero	4.342193628794542	0	NA	NA	NA	NA	NA	NA	NA	NA	NA
I	I:1825779	1825779	A	G	0.0573248	-0.0284673	0.172867	0.869198	0.06088128164967586	Mean number of eggs in utero	4.342193628794542	0	NA	NA	NA	NA	NA	NA	NA	NA	NA
I	I:1826318	1826318	A	T	0.0605096	0.0505711	0.144699	0.726721	0.1386322898516745	Mean number of eggs in utero	4.342193628794542	0	NA	NA	NA	NA	NA	NA	NA	NA	NA
I	I:1827838	1827838	G	A	0.159236	-0.0902753	0.105798	0.393506	0.40504864133026464	Mean number of eggs in utero	4.342193628794542	0	NA	NA	NA	NA	NA	NA	NA	NA	NA
I	I:1829726	1829726	G	A	0.197452	-0.0521619	0.0858308	0.543367	0.26490674087781524	Mean number of eggs in utero	4.342193628794542	0	NA	NA	NA	NA	NA	NA	NA	NA	NA
I	I:1834852	1834852	C	A	0.363057	-0.116438	0.0822451	0.15685	0.8045154769662362	Mean number of eggs in utero	4.342193628794542	0	NA	NA	NA	NA	NA	NA	NA	NA	NA
I	I:1835459	1835459	G	A	0.0923567	0.191629	0.109506	0.0801283	1.096214071142043	Mean number of eggs in utero	4.342193628794542	0	NA	NA	NA	NA	NA	NA	NA	NA	NA
I	I:1836131	1836131	A	G	0.0859873	-0.0834793	0.120738	0.489309	0.31041679606432	Mean number of eggs in utero	4.342193628794542	0	NA	NA	NA	NA	NA	NA	NA	NA	NA
I	I:1836455	1836455	A	G	0.248408	-0.0229756	0.0851029	0.78718	0.10392594862140364	Mean number of eggs in utero	4.342193628794542	0	NA	NA	NA	NA	NA	NA	NA	NA	NA
I	I:1836887	1836887	G	A	0.207006	-0.101295	0.098494	0.303744	0.5174922921347926	Mean number of eggs in utero	4.342193628794542	0	NA	NA	NA	NA	NA	NA	NA	NA	NA
I	I:1840800	1840800	C	T	0.33121	0.160277	0.0778077	0.0394068	1.4044288302642387	Mean number of eggs in utero	4.342193628794542	0	NA	NA	NA	NA	NA	NA	NA	NA	NA
I	I:1844364	1844364	G	T	0.0923567	0.086962	0.177337	0.623867	0.20490798615508413	Mean number of eggs in utero	4.342193628794542	0	NA	NA	NA	NA	NA	NA	NA	NA	NA
I	I:1845174	1845174	C	T	0.433121	-0.113933	0.0751871	0.129689	0.8870968584717708	Mean number of eggs in utero	4.342193628794542	0	NA	NA	NA	NA	NA	NA	NA	NA	NA
I	I:1845215	1845215	T	C	0.324841	-0.0942762	0.0786296	0.230531	0.6372706658331597	Mean number of eggs in utero	4.342193628794542	0	NA	NA	NA	NA	NA	NA	NA	NA	NA
I	I:1846045	1846045	A	G	0.146497	-0.0656834	0.0952247	0.490337	0.309505334390882	Mean number of eggs in utero	4.342193628794542	0	NA	NA	NA	NA	NA	NA	NA	NA	NA
I	I:1858436	1858436	T	C	0.226115	-0.0807604	0.0898297	0.368632	0.43340696748861185	Mean number of eggs in utero	4.342193628794542	0	NA	NA	NA	NA	NA	NA	NA	NA	NA
I	I:1859641	1859641	G	A	0.490446	0.0776066	0.0733513	0.290049	0.5375286275079876	Mean number of eggs in utero	4.342193628794542	0	NA	NA	NA	NA	NA	NA	NA	NA	NA
I	I:1861201	1861201	A	G	0.089172	-0.044036	0.119286	0.712007	0.14751573663501263	Mean number of eggs in utero	4.342193628794542	0	NA	NA	NA	NA	NA	NA	NA	NA	NA
I	I:1861893	1861893	T	C	0.0573248	0.0281627	0.155168	0.855977	0.06753790460705372	Mean number of eggs in utero	4.342193628794542	0	NA	NA	NA	NA	NA	NA	NA	NA	NA
I	I:1862866	1862866	C	T	0.235669	0.00668854	0.0850771	0.937337	0.028104239499202863	Mean number of eggs in utero	4.342193628794542	0	NA	NA	NA	NA	NA	NA	NA	NA	NA
I	I:1863579	1863579	A	G	0.089172	0.1961	0.110769	0.076669	1.1153802012450589	Mean number of eggs in utero	4.342193628794542	0	NA	NA	NA	NA	NA	NA	NA	NA	NA
I	I:1873767	1873767	A	T	0.0700637	-0.216308	0.276995	0.434855	0.361655532005498	Mean number of eggs in utero	4.342193628794542	0	NA	NA	NA	NA	NA	NA	NA	NA	NA
I	I:1874558	1874558	T	C	0.136943	0.00432298	0.111039	0.968944	0.013701322220414168	Mean number of eggs in utero	4.342193628794542	0	NA	NA	NA	NA	NA	NA	NA	NA	NA
I	I:1874805	1874805	T	G	0.296178	-0.0858425	0.0845399	0.309911	0.5087630086122236	Mean number of eggs in utero	4.342193628794542	0	NA	NA	NA	NA	NA	NA	NA	NA	NA
I	I:1875698	1875698	T	C	0.251592	-0.0416774	0.0848023	0.623097	0.20544433972033418	Mean number of eggs in utero	4.342193628794542	0	NA	NA	NA	NA	NA	NA	NA	NA	NA
I	I:1876381	1876381	G	A	0.178344	-0.0329032	0.100344	0.742985	0.12901995404963648	Mean number of eggs in utero	4.342193628794542	0	NA	NA	NA	NA	NA	NA	NA	NA	NA
I	I:1876789	1876789	A	T	0.171975	0.059036	0.0918282	0.520291	0.28375368647018073	Mean number of eggs in utero	4.342193628794542	0	NA	NA	NA	NA	NA	NA	NA	NA	NA
I	I:1876790	1876790	T	A	0.226115	-0.121363	0.101323	0.23100300000000001	0.6363823799564032	Mean number of eggs in utero	4.342193628794542	0	NA	NA	NA	NA	NA	NA	NA	NA	NA
I	I:1878171	1878171	A	T	0.359873	0.0549374	0.0792994	0.488445	0.31118433172263654	Mean number of eggs in utero	4.342193628794542	0	NA	NA	NA	NA	NA	NA	NA	NA	NA
I	I:1878887	1878887	G	C	0.375796	-0.0550425	0.0800667	0.491794	0.3082167740576246	Mean number of eggs in utero	4.342193628794542	0	NA	NA	NA	NA	NA	NA	NA	NA	NA
I	I:1880625	1880625	G	A	0.464968	-0.0774381	0.0758868	0.307519	0.5121280462617699	Mean number of eggs in utero	4.342193628794542	0	NA	NA	NA	NA	NA	NA	NA	NA	NA
I	I:1881920	1881920	A	G	0.105096	0.15955	0.103079	0.121662	0.9148450484532007	Mean number of eggs in utero	4.342193628794542	0	NA	NA	NA	NA	NA	NA	NA	NA	NA
I	I:1883323	1883323	C	G	0.235669	-0.0104125	0.0882028	0.906027	0.04285885996525047	Mean number of eggs in utero	4.342193628794542	0	NA	NA	NA	NA	NA	NA	NA	NA	NA
I	I:1883531	1883531	T	A	0.159236	0.0473522	0.107527	0.659667	0.1806752410618401	Mean number of eggs in utero	4.342193628794542	0	NA	NA	NA	NA	NA	NA	NA	NA	NA
I	I:1883618	1883618	T	G	0.133758	-0.0472509	0.0982723	0.630647	0.20021366587479728	Mean number of eggs in utero	4.342193628794542	0	NA	NA	NA	NA	NA	NA	NA	NA	NA
I	I:1884419	1884419	T	C	0.248408	0.0865949	0.0945677	0.359828	0.443905045069521	Mean number of eggs in utero	4.342193628794542	0	NA	NA	NA	NA	NA	NA	NA	NA	NA
I	I:1892241	1892241	C	T	0.089172	0.251535	0.203049	0.215424	0.6667059143763078	Mean number of eggs in utero	4.342193628794542	0	NA	NA	NA	NA	NA	NA	NA	NA	NA
I	I:1902516	1902516	A	C	0.0828025	-0.0518286	0.119767	0.665201	0.17704710657495448	Mean number of eggs in utero	4.342193628794542	0	NA	NA	NA	NA	NA	NA	NA	NA	NA
I	I:1907670	1907670	T	C	0.299363	-0.0102331	0.0802306	0.898508	0.0464780517320937	Mean number of eggs in utero	4.342193628794542	0	NA	NA	NA	NA	NA	NA	NA	NA	NA
I	I:1911932	1911932	A	G	0.484076	0.00929331	0.0736797	0.899628	0.04593703605515406	Mean number of eggs in utero	4.342193628794542	0	NA	NA	NA	NA	NA	NA	NA	NA	NA
I	I:1916325	1916325	A	C	0.0573248	-0.0420137	0.148928	0.777862	0.10909744408292521	Mean number of eggs in utero	4.342193628794542	0	NA	NA	NA	NA	NA	NA	NA	NA	NA
I	I:1916879	1916879	A	G	0.464968	0.0786365	0.0712418	0.269681	0.5691496500833589	Mean number of eggs in utero	4.342193628794542	0	NA	NA	NA	NA	NA	NA	NA	NA	NA
I	I:1931884	1931884	T	C	0.0573248	-0.0398506	0.133514	0.765341	0.1161450205045918	Mean number of eggs in utero	4.342193628794542	0	NA	NA	NA	NA	NA	NA	NA	NA	NA
I	I:1934528	1934528	G	T	0.455414	0.0366833	0.0738111	0.619198	0.20817045508738372	Mean number of eggs in utero	4.342193628794542	0	NA	NA	NA	NA	NA	NA	NA	NA	NA
I	I:1942073	1942073	G	A	0.496815	-0.0559593	0.0741813	0.450633	0.34617700792259226	Mean number of eggs in utero	4.342193628794542	0	NA	NA	NA	NA	NA	NA	NA	NA	NA
I	I:1948337	1948337	G	A	0.363057	0.0620153	0.0762312	0.415922	0.3809881072236512	Mean number of eggs in utero	4.342193628794542	0	NA	NA	NA	NA	NA	NA	NA	NA	NA
I	I:1958809	1958809	A	T	0.318471	-0.0481576	0.0776385	0.535073	0.27158696314806724	Mean number of eggs in utero	4.342193628794542	0	NA	NA	NA	NA	NA	NA	NA	NA	NA
I	I:1969878	1969878	C	T	0.493631	0.0882105	0.0728073	0.22568	0.6465069268526902	Mean number of eggs in utero	4.342193628794542	0	NA	NA	NA	NA	NA	NA	NA	NA	NA
I	I:1972102	1972102	G	T	0.089172	-0.0663396	0.124076	0.592879	0.22703393225857518	Mean number of eggs in utero	4.342193628794542	0	NA	NA	NA	NA	NA	NA	NA	NA	NA
I	I:1973720	1973720	G	C	0.207006	-0.0286363	0.09041	0.751442	0.12410453477372517	Mean number of eggs in utero	4.342193628794542	0	NA	NA	NA	NA	NA	NA	NA	NA	NA
I	I:1973889	1973889	C	T	0.382166	0.0541626	0.0715666	0.449162	0.34759699303478736	Mean number of eggs in utero	4.342193628794542	0	NA	NA	NA	NA	NA	NA	NA	NA	NA
I	I:1973940	1973940	A	G	0.44586	-0.118672	0.0766569	0.121601	0.9150628535772957	Mean number of eggs in utero	4.342193628794542	0	NA	NA	NA	NA	NA	NA	NA	NA	NA
I	I:1978163	1978163	C	T	0.254777	0.0213369	0.0795649	0.788569	0.10316029978823932	Mean number of eggs in utero	4.342193628794542	0	NA	NA	NA	NA	NA	NA	NA	NA	NA
I	I:1978169	1978169	A	G	0.16242	-0.076918	0.103255	0.456311	0.3407390618393936	Mean number of eggs in utero	4.342193628794542	0	NA	NA	NA	NA	NA	NA	NA	NA	NA
I	I:1978177	1978177	T	G	0.0987261	-0.0248281	0.114977	0.829034	0.08142765797856627	Mean number of eggs in utero	4.342193628794542	0	NA	NA	NA	NA	NA	NA	NA	NA	NA
I	I:1981352	1981352	A	T	0.111465	-0.00318849	0.109302	0.976728	0.01022636212130382	Mean number of eggs in utero	4.342193628794542	0	NA	NA	NA	NA	NA	NA	NA	NA	NA
I	I:1988317	1988317	G	A	0.0700637	-0.19854	0.212364	0.349838	0.4561330184880526	Mean number of eggs in utero	4.342193628794542	0	NA	NA	NA	NA	NA	NA	NA	NA	NA
I	I:1989067	1989067	A	G	0.33121	0.012679	0.0743295	0.864556	0.0632068708651166	Mean number of eggs in utero	4.342193628794542	0	NA	NA	NA	NA	NA	NA	NA	NA	NA
I	I:1989103	1989103	C	T	0.347134	-0.0884442	0.0753593	0.240542	0.6188090823849051	Mean number of eggs in utero	4.342193628794542	0	NA	NA	NA	NA	NA	NA	NA	NA	NA
I	I:1996959	1996959	C	T	0.0828025	0.27832	0.210497	0.186101	0.7302512932135905	Mean number of eggs in utero	4.342193628794542	0	NA	NA	NA	NA	NA	NA	NA	NA	NA
I	I:1997707	1997707	C	T	0.0605096	-0.0847457	0.469001	0.856608	0.06721787397443497	Mean number of eggs in utero	4.342193628794542	0	NA	NA	NA	NA	NA	NA	NA	NA	NA
I	I:1999736	1999736	T	G	0.10828	0.00917726	0.113991	0.935833	0.02880164447701627	Mean number of eggs in utero	4.342193628794542	0	NA	NA	NA	NA	NA	NA	NA	NA	NA
I	I:2009926	2009926	A	G	0.136943	-0.107384	0.102661	0.295555	0.5293616891520362	Mean number of eggs in utero	4.342193628794542	0	NA	NA	NA	NA	NA	NA	NA	NA	NA
I	I:2011482	2011482	G	A	0.480892	-0.0480487	0.079033	0.543215	0.2650282462251887	Mean number of eggs in utero	4.342193628794542	0	NA	NA	NA	NA	NA	NA	NA	NA	NA
I	I:2013029	2013029	C	A	0.127389	0.0344041	0.137498	0.80242	0.09559825523515698	Mean number of eggs in utero	4.342193628794542	0	NA	NA	NA	NA	NA	NA	NA	NA	NA
I	I:2016939	2016939	A	G	0.264331	-0.0502976	0.0838203	0.548463	0.26085266515003963	Mean number of eggs in utero	4.342193628794542	0	NA	NA	NA	NA	NA	NA	NA	NA	NA
I	I:2017779	2017779	A	G	0.0541401	0.154098	0.26149	0.555655	0.25519477334783	Mean number of eggs in utero	4.342193628794542	0	NA	NA	NA	NA	NA	NA	NA	NA	NA
I	I:2019326	2019326	T	G	0.0955414	0.411946	0.185063	0.0260157	1.5847644841232251	Mean number of eggs in utero	4.342193628794542	0	NA	NA	NA	NA	NA	NA	NA	NA	NA
I	I:2020050	2020050	T	C	0.449045	0.0414566	0.078881	0.599195	0.22243181927632932	Mean number of eggs in utero	4.342193628794542	0	NA	NA	NA	NA	NA	NA	NA	NA	NA
I	I:2023053	2023053	A	G	0.353503	-0.0300237	0.076646	0.695265	0.15784963267314428	Mean number of eggs in utero	4.342193628794542	0	NA	NA	NA	NA	NA	NA	NA	NA	NA
I	I:2024319	2024319	G	A	0.0700637	-0.0155577	0.130592	0.905171	0.043269368484129524	Mean number of eggs in utero	4.342193628794542	0	NA	NA	NA	NA	NA	NA	NA	NA	NA
I	I:2024674	2024674	C	T	0.089172	0.0368372	0.127399	0.772467	0.11212006468503827	Mean number of eggs in utero	4.342193628794542	0	NA	NA	NA	NA	NA	NA	NA	NA	NA
I	I:2025524	2025524	C	T	0.121019	-0.0885406	0.105607	0.401809	0.3959803398462005	Mean number of eggs in utero	4.342193628794542	0	NA	NA	NA	NA	NA	NA	NA	NA	NA
I	I:2029698	2029698	A	T	0.101911	-0.0121818	0.11522	0.9158	0.03819936080832148	Mean number of eggs in utero	4.342193628794542	0	NA	NA	NA	NA	NA	NA	NA	NA	NA
I	I:2033615	2033615	A	T	0.0700637	0.0399024	0.260855	0.878423	0.05629630148879984	Mean number of eggs in utero	4.342193628794542	0	NA	NA	NA	NA	NA	NA	NA	NA	NA
I	I:2039518	2039518	T	C	0.066879	0.022634	0.150615	0.880546	0.055247951423743655	Mean number of eggs in utero	4.342193628794542	0	NA	NA	NA	NA	NA	NA	NA	NA	NA
I	I:2041286	2041286	A	G	0.0828025	0.094872	0.115947	0.413222	0.3838165646348555	Mean number of eggs in utero	4.342193628794542	0	NA	NA	NA	NA	NA	NA	NA	NA	NA
I	I:2057453	2057453	C	T	0.496815	0.0747633	0.0789364	0.343571	0.4639835010442226	Mean number of eggs in utero	4.342193628794542	0	NA	NA	NA	NA	NA	NA	NA	NA	NA
I	I:2058361	2058361	T	C	0.152866	-0.0892245	0.107447	0.406308	0.3911446265496631	Mean number of eggs in utero	4.342193628794542	0	NA	NA	NA	NA	NA	NA	NA	NA	NA
I	I:2058581	2058581	C	T	0.242038	0.00218955	0.0831999	0.979005	0.0092150901510354	Mean number of eggs in utero	4.342193628794542	0	NA	NA	NA	NA	NA	NA	NA	NA	NA
I	I:2062734	2062734	A	T	0.121019	-0.0234384	0.1072	0.826929	0.0825317773058784	Mean number of eggs in utero	4.342193628794542	0	NA	NA	NA	NA	NA	NA	NA	NA	NA
I	I:2067700	2067700	T	C	0.0859873	0.111859	0.131802	0.396052	0.40224778925012916	Mean number of eggs in utero	4.342193628794542	0	NA	NA	NA	NA	NA	NA	NA	NA	NA
I	I:2068166	2068166	A	T	0.410828	0.0155863	0.0785688	0.84275	0.07430123880699047	Mean number of eggs in utero	4.342193628794542	0	NA	NA	NA	NA	NA	NA	NA	NA	NA
I	I:2073189	2073189	G	A	0.27707	-0.0804336	0.0834136	0.334908	0.4750744782757239	Mean number of eggs in utero	4.342193628794542	0	NA	NA	NA	NA	NA	NA	NA	NA	NA
I	I:2078066	2078066	A	C	0.490446	-0.00494853	0.0758018	0.947949	0.02321502723406347	Mean number of eggs in utero	4.342193628794542	0	NA	NA	NA	NA	NA	NA	NA	NA	NA
I	I:2086667	2086667	C	T	0.089172	-0.0742313	0.12464	0.551466	0.25848125832363844	Mean number of eggs in utero	4.342193628794542	0	NA	NA	NA	NA	NA	NA	NA	NA	NA
I	I:2088716	2088716	T	G	0.0987261	-0.0451077	0.117012	0.69987	0.1549826221655309	Mean number of eggs in utero	4.342193628794542	0	NA	NA	NA	NA	NA	NA	NA	NA	NA
I	I:2089106	2089106	T	C	0.066879	0.022634	0.150615	0.880546	0.055247951423743655	Mean number of eggs in utero	4.342193628794542	0	NA	NA	NA	NA	NA	NA	NA	NA	NA
I	I:2089626	2089626	T	C	0.187898	0.00839398	0.112206	0.940367	0.02670261983779273	Mean number of eggs in utero	4.342193628794542	0	NA	NA	NA	NA	NA	NA	NA	NA	NA
I	I:2089675	2089675	T	C	0.127389	0.0137604	0.114369	0.904233	0.04371964742738099	Mean number of eggs in utero	4.342193628794542	0	NA	NA	NA	NA	NA	NA	NA	NA	NA
I	I:2092530	2092530	G	T	0.242038	-0.16516	0.0818139	0.0435151	1.3613600141088318	Mean number of eggs in utero	4.342193628794542	0	NA	NA	NA	NA	NA	NA	NA	NA	NA
I	I:2093221	2093221	A	T	0.286624	-0.174864	0.0852074	0.0401483	1.3963328393329952	Mean number of eggs in utero	4.342193628794542	0	NA	NA	NA	NA	NA	NA	NA	NA	NA
I	I:2093294	2093294	A	G	0.340764	0.0869399	0.0771495	0.259784	0.58538760047504	Mean number of eggs in utero	4.342193628794542	0	NA	NA	NA	NA	NA	NA	NA	NA	NA
I	I:2093341	2093341	C	G	0.0605096	-0.0847457	0.469001	0.856608	0.06721787397443497	Mean number of eggs in utero	4.342193628794542	0	NA	NA	NA	NA	NA	NA	NA	NA	NA
I	I:2093842	2093842	G	A	0.156051	-0.106722	0.105875	0.313456	0.5038234127226067	Mean number of eggs in utero	4.342193628794542	0	NA	NA	NA	NA	NA	NA	NA	NA	NA
I	I:2095395	2095395	G	A	0.105096	-0.098471	0.120138	0.412417	0.38466344122066226	Mean number of eggs in utero	4.342193628794542	0	NA	NA	NA	NA	NA	NA	NA	NA	NA
I	I:2100488	2100488	T	G	0.33758	-0.0352068	0.0767587	0.646472	0.18945028054202767	Mean number of eggs in utero	4.342193628794542	0	NA	NA	NA	NA	NA	NA	NA	NA	NA
I	I:2100656	2100656	T	C	0.490446	-0.0521117	0.0741457	0.482163	0.3168061193678525	Mean number of eggs in utero	4.342193628794542	0	NA	NA	NA	NA	NA	NA	NA	NA	NA
I	I:2100737	2100737	T	A	0.133758	-0.1083	0.103108	0.293552	0.5323149563832179	Mean number of eggs in utero	4.342193628794542	0	NA	NA	NA	NA	NA	NA	NA	NA	NA
I	I:2102101	2102101	T	C	0.0955414	0.142063	0.107685	0.187087	0.7279563890067475	Mean number of eggs in utero	4.342193628794542	0	NA	NA	NA	NA	NA	NA	NA	NA	NA
I	I:2102313	2102313	T	C	0.487261	-0.0864607	0.0807665	0.284393	0.5460810974598057	Mean number of eggs in utero	4.342193628794542	0	NA	NA	NA	NA	NA	NA	NA	NA	NA
I	I:2108680	2108680	A	C	0.143312	0.0295769	0.125375	0.813504	0.08964030729546076	Mean number of eggs in utero	4.342193628794542	0	NA	NA	NA	NA	NA	NA	NA	NA	NA
I	I:2110467	2110467	C	G	0.159236	0.102902	0.111107	0.354368	0.45054550250417946	Mean number of eggs in utero	4.342193628794542	0	NA	NA	NA	NA	NA	NA	NA	NA	NA
I	I:2112458	2112458	A	G	0.10828	0.00436859	0.113398	0.96927	0.01355522895884911	Mean number of eggs in utero	4.342193628794542	0	NA	NA	NA	NA	NA	NA	NA	NA	NA
I	I:2113910	2113910	G	A	0.165605	0.125355	0.109718	0.253237	0.5964728400374842	Mean number of eggs in utero	4.342193628794542	0	NA	NA	NA	NA	NA	NA	NA	NA	NA
I	I:2119570	2119570	G	A	0.43949	0.0541371	0.0814519	0.506274	0.2956143754898514	Mean number of eggs in utero	4.342193628794542	0	NA	NA	NA	NA	NA	NA	NA	NA	NA
I	I:2119977	2119977	A	T	0.0859873	0.0854337	0.134759	0.526099	0.27893252370159527	Mean number of eggs in utero	4.342193628794542	0	NA	NA	NA	NA	NA	NA	NA	NA	NA
I	I:2124855	2124855	G	A	0.066879	0.022634	0.150615	0.880546	0.055247951423743655	Mean number of eggs in utero	4.342193628794542	0	NA	NA	NA	NA	NA	NA	NA	NA	NA
I	I:2138645	2138645	A	G	0.372611	0.0441986	0.0789772	0.575727	0.23978340286022162	Mean number of eggs in utero	4.342193628794542	0	NA	NA	NA	NA	NA	NA	NA	NA	NA
I	I:2143954	2143954	A	T	0.261146	-0.0743735	0.0802303	0.353926	0.45108753218653913	Mean number of eggs in utero	4.342193628794542	0	NA	NA	NA	NA	NA	NA	NA	NA	NA
I	I:2143993	2143993	A	G	0.238854	0.0173639	0.0813899	0.83106	0.08036762034555277	Mean number of eggs in utero	4.342193628794542	0	NA	NA	NA	NA	NA	NA	NA	NA	NA
I	I:2153841	2153841	C	A	0.219745	-0.0471066	0.0855153	0.581732	0.23527704580937128	Mean number of eggs in utero	4.342193628794542	0	NA	NA	NA	NA	NA	NA	NA	NA	NA
I	I:2153867	2153867	T	A	0.353503	-0.0328216	0.0791708	0.678459	0.16847639208938367	Mean number of eggs in utero	4.342193628794542	0	NA	NA	NA	NA	NA	NA	NA	NA	NA
I	I:2157371	2157371	T	C	0.200637	-0.109639	0.0938238	0.242578	0.6151485889263644	Mean number of eggs in utero	4.342193628794542	0	NA	NA	NA	NA	NA	NA	NA	NA	NA
I	I:2162191	2162191	G	T	0.490446	0.107171	0.0722063	0.137747	0.8609178508981983	Mean number of eggs in utero	4.342193628794542	0	NA	NA	NA	NA	NA	NA	NA	NA	NA
I	I:2162932	2162932	T	A	0.464968	0.0767526	0.0730391	0.293331	0.5326420371984307	Mean number of eggs in utero	4.342193628794542	0	NA	NA	NA	NA	NA	NA	NA	NA	NA
I	I:2170282	2170282	T	G	0.200637	0.0430005	0.0907086	0.635463	0.19690973128405512	Mean number of eggs in utero	4.342193628794542	0	NA	NA	NA	NA	NA	NA	NA	NA	NA
I	I:2172048	2172048	T	A	0.378981	0.0422444	0.0785568	0.590745	0.22859994550024687	Mean number of eggs in utero	4.342193628794542	0	NA	NA	NA	NA	NA	NA	NA	NA	NA
I	I:2179331	2179331	G	A	0.0732484	-0.0659628	0.137077	0.630366	0.20040721939317457	Mean number of eggs in utero	4.342193628794542	0	NA	NA	NA	NA	NA	NA	NA	NA	NA
I	I:2183613	2183613	G	C	0.0828025	0.121156	0.116626	0.298878	0.5245060516058826	Mean number of eggs in utero	4.342193628794542	0	NA	NA	NA	NA	NA	NA	NA	NA	NA
I	I:2187602	2187602	G	T	0.464968	-0.00774435	0.0784852	0.921398	0.035552734768282135	Mean number of eggs in utero	4.342193628794542	0	NA	NA	NA	NA	NA	NA	NA	NA	NA
I	I:2190014	2190014	G	T	0.111465	0.0401332	0.104217	0.700167	0.15479836208803274	Mean number of eggs in utero	4.342193628794542	0	NA	NA	NA	NA	NA	NA	NA	NA	NA
I	I:2190063	2190063	C	T	0.410828	-0.0101559	0.0774663	0.895695	0.047839850122335846	Mean number of eggs in utero	4.342193628794542	0	NA	NA	NA	NA	NA	NA	NA	NA	NA
I	I:2192695	2192695	G	T	0.0509554	0.203451	0.295136	0.490605	0.3092680299956253	Mean number of eggs in utero	4.342193628794542	0	NA	NA	NA	NA	NA	NA	NA	NA	NA
I	I:2199094	2199094	A	T	0.251592	0.0175518	0.0822411	0.831	0.08039897621588903	Mean number of eggs in utero	4.342193628794542	0	NA	NA	NA	NA	NA	NA	NA	NA	NA
I	I:2201824	2201824	C	T	0.302548	0.0312256	0.0795792	0.694775	0.15815581710660961	Mean number of eggs in utero	4.342193628794542	0	NA	NA	NA	NA	NA	NA	NA	NA	NA
I	I:2210363	2210363	G	A	0.089172	0.0320582	0.123263	0.794803	0.0997405023058223	Mean number of eggs in utero	4.342193628794542	0	NA	NA	NA	NA	NA	NA	NA	NA	NA
I	I:2211566	2211566	C	T	0.111465	0.0543452	0.103637	0.600014	0.22183861619666803	Mean number of eggs in utero	4.342193628794542	0	NA	NA	NA	NA	NA	NA	NA	NA	NA
I	I:2212164	2212164	A	C	0.0509554	0.0834746	0.15647	0.593697	0.22643514559430086	Mean number of eggs in utero	4.342193628794542	0	NA	NA	NA	NA	NA	NA	NA	NA	NA
I	I:2216296	2216296	A	G	0.181529	-0.0654989	0.0937549	0.48479	0.3144463471536736	Mean number of eggs in utero	4.342193628794542	0	NA	NA	NA	NA	NA	NA	NA	NA	NA
I	I:2219230	2219230	C	A	0.0573248	0.171277	0.380224	0.652377	0.18550135871263587	Mean number of eggs in utero	4.342193628794542	0	NA	NA	NA	NA	NA	NA	NA	NA	NA
I	I:2222269	2222269	T	C	0.203822	-0.00393359	0.0865424	0.963746	0.016037411463977705	Mean number of eggs in utero	4.342193628794542	0	NA	NA	NA	NA	NA	NA	NA	NA	NA
I	I:2225016	2225016	A	T	0.16242	0.00483847	0.0998706	0.96136	0.01711395183569646	Mean number of eggs in utero	4.342193628794542	0	NA	NA	NA	NA	NA	NA	NA	NA	NA
I	I:2225524	2225524	T	G	0.251592	0.0175518	0.0822411	0.831	0.08039897621588903	Mean number of eggs in utero	4.342193628794542	0	NA	NA	NA	NA	NA	NA	NA	NA	NA
I	I:2226458	2226458	C	T	0.089172	0.0320582	0.123263	0.794803	0.0997405023058223	Mean number of eggs in utero	4.342193628794542	0	NA	NA	NA	NA	NA	NA	NA	NA	NA
I	I:2230008	2230008	C	G	0.16879	-0.0829882	0.0990292	0.402021	0.39575126048290676	Mean number of eggs in utero	4.342193628794542	0	NA	NA	NA	NA	NA	NA	NA	NA	NA
I	I:2231400	2231400	A	G	0.181529	-0.0238053	0.0866425	0.783506	0.1059576734048179	Mean number of eggs in utero	4.342193628794542	0	NA	NA	NA	NA	NA	NA	NA	NA	NA
I	I:2236111	2236111	C	T	0.0700637	0.229248	0.260027	0.377974	0.42253807329739024	Mean number of eggs in utero	4.342193628794542	0	NA	NA	NA	NA	NA	NA	NA	NA	NA
I	I:2237686	2237686	C	T	0.207006	-0.0457462	0.0790309	0.562698	0.24972462845806956	Mean number of eggs in utero	4.342193628794542	0	NA	NA	NA	NA	NA	NA	NA	NA	NA
I	I:2238378	2238378	T	C	0.0636943	0.118367	0.132144	0.370388	0.43134309223363665	Mean number of eggs in utero	4.342193628794542	0	NA	NA	NA	NA	NA	NA	NA	NA	NA
I	I:2244304	2244304	G	T	0.171975	0.0757195	0.0908149	0.404406	0.39318240959052964	Mean number of eggs in utero	4.342193628794542	0	NA	NA	NA	NA	NA	NA	NA	NA	NA
I	I:2248439	2248439	T	C	0.0541401	-0.121198	0.13564	0.371577	0.42995117595455745	Mean number of eggs in utero	4.342193628794542	0	NA	NA	NA	NA	NA	NA	NA	NA	NA
I	I:2254096	2254096	C	T	0.251592	-0.0738866	0.0822125	0.368798	0.4332114428009435	Mean number of eggs in utero	4.342193628794542	0	NA	NA	NA	NA	NA	NA	NA	NA	NA
I	I:2257541	2257541	A	G	0.11465	0.0418726	0.102585	0.683145	0.16548710595783594	Mean number of eggs in utero	4.342193628794542	0	NA	NA	NA	NA	NA	NA	NA	NA	NA
I	I:2260247	2260247	A	G	0.165605	0.014976	0.0992641	0.880078	0.055478835272103975	Mean number of eggs in utero	4.342193628794542	0	NA	NA	NA	NA	NA	NA	NA	NA	NA
I	I:2261070	2261070	T	G	0.242038	-0.0955741	0.0741447	0.197391	0.7046726527780478	Mean number of eggs in utero	4.342193628794542	0	NA	NA	NA	NA	NA	NA	NA	NA	NA
I	I:2270595	2270595	G	A	0.165605	-0.0297853	0.0890679	0.73807	0.13190244688690306	Mean number of eggs in utero	4.342193628794542	0	NA	NA	NA	NA	NA	NA	NA	NA	NA
I	I:2271943	2271943	G	A	0.0605096	-0.0847457	0.469001	0.856608	0.06721787397443497	Mean number of eggs in utero	4.342193628794542	0	NA	NA	NA	NA	NA	NA	NA	NA	NA
I	I:2273828	2273828	C	T	0.0987261	-0.107967	0.147873	0.465309	0.33225854726785803	Mean number of eggs in utero	4.342193628794542	0	NA	NA	NA	NA	NA	NA	NA	NA	NA
I	I:2284631	2284631	G	C	0.254777	-0.0361851	0.081702	0.657844	0.18187708202676534	Mean number of eggs in utero	4.342193628794542	0	NA	NA	NA	NA	NA	NA	NA	NA	NA
I	I:2297636	2297636	A	G	0.181529	-0.0712745	0.099177	0.472351	0.32573516087510374	Mean number of eggs in utero	4.342193628794542	0	NA	NA	NA	NA	NA	NA	NA	NA	NA
I	I:2298783	2298783	T	C	0.0573248	0.0719214	0.230188	0.754701	0.12222507455584698	Mean number of eggs in utero	4.342193628794542	0	NA	NA	NA	NA	NA	NA	NA	NA	NA
I	I:2301872	2301872	A	G	0.165605	0.014976	0.0992641	0.880078	0.055478835272103975	Mean number of eggs in utero	4.342193628794542	0	NA	NA	NA	NA	NA	NA	NA	NA	NA
I	I:2309623	2309623	T	A	0.140127	-0.0170588	0.0966029	0.859833	0.06558589087419116	Mean number of eggs in utero	4.342193628794542	0	NA	NA	NA	NA	NA	NA	NA	NA	NA
I	I:2312495	2312495	A	G	0.0859873	0.00919501	0.123476	0.940638	0.02657748055808842	Mean number of eggs in utero	4.342193628794542	0	NA	NA	NA	NA	NA	NA	NA	NA	NA
I	I:2312629	2312629	C	T	0.347134	-0.0382304	0.0817083	0.639864	0.19391232340046172	Mean number of eggs in utero	4.342193628794542	0	NA	NA	NA	NA	NA	NA	NA	NA	NA
I	I:2315559	2315559	A	G	0.101911	0.0611806	0.108456	0.572683	0.24208570865508863	Mean number of eggs in utero	4.342193628794542	0	NA	NA	NA	NA	NA	NA	NA	NA	NA
I	I:2316315	2316315	A	G	0.0605096	-0.0847457	0.469001	0.856608	0.06721787397443497	Mean number of eggs in utero	4.342193628794542	0	NA	NA	NA	NA	NA	NA	NA	NA	NA
I	I:2316406	2316406	C	T	0.27707	0.0429215	0.0826721	0.603637	0.21922414794988063	Mean number of eggs in utero	4.342193628794542	0	NA	NA	NA	NA	NA	NA	NA	NA	NA
I	I:2317196	2317196	T	A	0.490446	0.0227857	0.0702988	0.745842	0.12735316421062912	Mean number of eggs in utero	4.342193628794542	0	NA	NA	NA	NA	NA	NA	NA	NA	NA
I	I:2324491	2324491	A	C	0.407643	0.0525282	0.0844919	0.534143	0.27234245870747664	Mean number of eggs in utero	4.342193628794542	0	NA	NA	NA	NA	NA	NA	NA	NA	NA
I	I:2325824	2325824	A	T	0.203822	0.0254661	0.0875703	0.771199	0.1128335422467758	Mean number of eggs in utero	4.342193628794542	0	NA	NA	NA	NA	NA	NA	NA	NA	NA
I	I:2329917	2329917	C	T	0.181529	-0.0712745	0.099177	0.472351	0.32573516087510374	Mean number of eggs in utero	4.342193628794542	0	NA	NA	NA	NA	NA	NA	NA	NA	NA
I	I:2333917	2333917	G	A	0.343949	0.0391005	0.085033	0.64564	0.19000957115906664	Mean number of eggs in utero	4.342193628794542	0	NA	NA	NA	NA	NA	NA	NA	NA	NA
I	I:2359911	2359911	T	C	0.398089	0.0469338	0.083571	0.574386	0.24079615406666843	Mean number of eggs in utero	4.342193628794542	0	NA	NA	NA	NA	NA	NA	NA	NA	NA
I	I:2373940	2373940	G	A	0.404459	-0.0523704	0.0771608	0.497317	0.30336669483975837	Mean number of eggs in utero	4.342193628794542	0	NA	NA	NA	NA	NA	NA	NA	NA	NA
I	I:2374176	2374176	G	T	0.343949	-0.0592881	0.0772287	0.442668	0.35392187157372446	Mean number of eggs in utero	4.342193628794542	0	NA	NA	NA	NA	NA	NA	NA	NA	NA
I	I:2376526	2376526	C	T	0.474522	-0.0558363	0.0750633	0.456963	0.3401189630512809	Mean number of eggs in utero	4.342193628794542	0	NA	NA	NA	NA	NA	NA	NA	NA	NA
I	I:2377637	2377637	T	G	0.105096	0.0580241	0.107037	0.587753	0.23080514547801986	Mean number of eggs in utero	4.342193628794542	0	NA	NA	NA	NA	NA	NA	NA	NA	NA
I	I:2377699	2377699	A	G	0.175159	0.076938	0.0902966	0.394181	0.4043043130703285	Mean number of eggs in utero	4.342193628794542	0	NA	NA	NA	NA	NA	NA	NA	NA	NA
I	I:2388781	2388781	T	G	0.257962	-0.0236549	0.0802246	0.768102	0.1145811040625661	Mean number of eggs in utero	4.342193628794542	0	NA	NA	NA	NA	NA	NA	NA	NA	NA
I	I:2393626	2393626	T	C	0.16879	0.0376094	0.0980298	0.701236	0.1541357962291017	Mean number of eggs in utero	4.342193628794542	0	NA	NA	NA	NA	NA	NA	NA	NA	NA
I	I:2393645	2393645	G	A	0.257962	0.0849935	0.0828786	0.305119	0.5155307476567271	Mean number of eggs in utero	4.342193628794542	0	NA	NA	NA	NA	NA	NA	NA	NA	NA
I	I:2393726	2393726	A	C	0.140127	-0.0170588	0.0966029	0.859833	0.06558589087419116	Mean number of eggs in utero	4.342193628794542	0	NA	NA	NA	NA	NA	NA	NA	NA	NA
I	I:2394565	2394565	C	A	0.343949	-0.057453	0.07302	0.431392	0.3651279129842163	Mean number of eggs in utero	4.342193628794542	0	NA	NA	NA	NA	NA	NA	NA	NA	NA
I	I:2394727	2394727	A	T	0.0636943	-0.0553922	0.122742	0.651781	0.18589830375953015	Mean number of eggs in utero	4.342193628794542	0	NA	NA	NA	NA	NA	NA	NA	NA	NA
I	I:2403348	2403348	A	G	0.302548	-0.124436	0.0754689	0.0991818	1.003568014183911	Mean number of eggs in utero	4.342193628794542	0	NA	NA	NA	NA	NA	NA	NA	NA	NA
I	I:2404847	2404847	G	C	0.216561	-0.0188223	0.0906675	0.835544	0.07803067508949692	Mean number of eggs in utero	4.342193628794542	0	NA	NA	NA	NA	NA	NA	NA	NA	NA
I	I:2405043	2405043	A	G	0.299363	-0.12056	0.07388	0.102715	0.9883661295133502	Mean number of eggs in utero	4.342193628794542	0	NA	NA	NA	NA	NA	NA	NA	NA	NA
I	I:2408324	2408324	A	C	0.0700637	0.0532743	0.14028	0.704114	0.15235702045620844	Mean number of eggs in utero	4.342193628794542	0	NA	NA	NA	NA	NA	NA	NA	NA	NA
I	I:2408326	2408326	G	C	0.0573248	-0.0251964	0.135002	0.851945	0.06958844158014557	Mean number of eggs in utero	4.342193628794542	0	NA	NA	NA	NA	NA	NA	NA	NA	NA
I	I:2409751	2409751	T	C	0.0605096	-0.0691798	0.12669	0.585026	0.23282483236976617	Mean number of eggs in utero	4.342193628794542	0	NA	NA	NA	NA	NA	NA	NA	NA	NA
I	I:2412714	2412714	T	C	0.0509554	0.229901	0.16355	0.159817	0.7963770259387539	Mean number of eggs in utero	4.342193628794542	0	NA	NA	NA	NA	NA	NA	NA	NA	NA
I	I:2417487	2417487	T	C	0.0732484	0.17115	0.153198	0.263917	0.5785326341512953	Mean number of eggs in utero	4.342193628794542	0	NA	NA	NA	NA	NA	NA	NA	NA	NA
I	I:2417713	2417713	A	G	0.11465	0.0233027	0.112422	0.835793	0.07790127051484319	Mean number of eggs in utero	4.342193628794542	0	NA	NA	NA	NA	NA	NA	NA	NA	NA
I	I:2421753	2421753	G	A	0.433121	-0.0964523	0.0730199	0.186533	0.7292443249807694	Mean number of eggs in utero	4.342193628794542	0	NA	NA	NA	NA	NA	NA	NA	NA	NA
I	I:2423561	2423561	G	A	0.270701	0.0148071	0.0870014	0.864858	0.06305519297322032	Mean number of eggs in utero	4.342193628794542	0	NA	NA	NA	NA	NA	NA	NA	NA	NA
I	I:2423677	2423677	T	C	0.254777	0.139169	0.0801396	0.0824606	1.0837535095086945	Mean number of eggs in utero	4.342193628794542	0	NA	NA	NA	NA	NA	NA	NA	NA	NA
I	I:2432227	2432227	A	G	0.165605	9.69175e-5	0.0997648	0.999225	3.367087149615612e-4	Mean number of eggs in utero	4.342193628794542	0	NA	NA	NA	NA	NA	NA	NA	NA	NA
I	I:2432286	2432286	T	A	0.0636943	0.204729	0.13256	0.122487	0.9119100021391263	Mean number of eggs in utero	4.342193628794542	0	NA	NA	NA	NA	NA	NA	NA	NA	NA
I	I:2433062	2433062	A	T	0.33758	-0.0691622	0.0780042	0.375269	0.42565731004735136	Mean number of eggs in utero	4.342193628794542	0	NA	NA	NA	NA	NA	NA	NA	NA	NA
I	I:2433505	2433505	A	G	0.226115	-0.034045	0.0860162	0.692254	0.15973452612350927	Mean number of eggs in utero	4.342193628794542	0	NA	NA	NA	NA	NA	NA	NA	NA	NA
I	I:2433866	2433866	G	A	0.468153	0.0861059	0.070644	0.222893	0.6519035704121342	Mean number of eggs in utero	4.342193628794542	0	NA	NA	NA	NA	NA	NA	NA	NA	NA
I	I:2437575	2437575	C	T	0.0509554	-0.0961926	0.135754	0.478586	0.32004000988404446	Mean number of eggs in utero	4.342193628794542	0	NA	NA	NA	NA	NA	NA	NA	NA	NA
I	I:2437731	2437731	T	C	0.0987261	0.0431804	0.109935	0.694481	0.15833963143540955	Mean number of eggs in utero	4.342193628794542	0	NA	NA	NA	NA	NA	NA	NA	NA	NA
I	I:2451164	2451164	T	C	0.0732484	0.0352494	0.136293	0.795921	0.09913003649187316	Mean number of eggs in utero	4.342193628794542	0	NA	NA	NA	NA	NA	NA	NA	NA	NA
I	I:2452512	2452512	G	A	0.0541401	0.0153464	0.167267	0.926899	0.03296758638668138	Mean number of eggs in utero	4.342193628794542	0	NA	NA	NA	NA	NA	NA	NA	NA	NA
I	I:2452787	2452787	A	T	0.0955414	-0.0271817	0.113709	0.81107	0.0909416620628	Mean number of eggs in utero	4.342193628794542	0	NA	NA	NA	NA	NA	NA	NA	NA	NA
I	I:2454099	2454099	T	C	0.181529	-0.0696409	0.0966108	0.471008	0.32697171638203937	Mean number of eggs in utero	4.342193628794542	0	NA	NA	NA	NA	NA	NA	NA	NA	NA
I	I:2455991	2455991	T	C	0.213376	-0.0436992	0.0932237	0.639244	0.1943333396084245	Mean number of eggs in utero	4.342193628794542	0	NA	NA	NA	NA	NA	NA	NA	NA	NA
I	I:2464700	2464700	A	G	0.39172	-0.0278692	0.0779068	0.720549	0.14233648021290257	Mean number of eggs in utero	4.342193628794542	0	NA	NA	NA	NA	NA	NA	NA	NA	NA
I	I:2473364	2473364	T	C	0.0828025	0.115447	0.118114	0.328361	0.4836484303912128	Mean number of eggs in utero	4.342193628794542	0	NA	NA	NA	NA	NA	NA	NA	NA	NA
I	I:2475583	2475583	G	T	0.5	0.00535871	0.0733787	0.941784	0.02604869207415859	Mean number of eggs in utero	4.342193628794542	0	NA	NA	NA	NA	NA	NA	NA	NA	NA
I	I:2495444	2495444	T	A	0.302548	-0.0794836	0.0751744	0.290364	0.5370572294682092	Mean number of eggs in utero	4.342193628794542	0	NA	NA	NA	NA	NA	NA	NA	NA	NA
I	I:2496114	2496114	A	G	0.315287	-0.00158452	0.0783544	0.983866	0.00706404732417738	Mean number of eggs in utero	4.342193628794542	0	NA	NA	NA	NA	NA	NA	NA	NA	NA
I	I:2496238	2496238	A	G	0.101911	0.0783521	0.111027	0.480372	0.3184223147576527	Mean number of eggs in utero	4.342193628794542	0	NA	NA	NA	NA	NA	NA	NA	NA	NA
I	I:2504331	2504331	A	T	0.366242	-0.0639686	0.0757577	0.398455	0.39962071907392793	Mean number of eggs in utero	4.342193628794542	0	NA	NA	NA	NA	NA	NA	NA	NA	NA
I	I:2508199	2508199	T	A	0.0828025	-0.0706624	0.116963	0.545749	0.2630070513950573	Mean number of eggs in utero	4.342193628794542	0	NA	NA	NA	NA	NA	NA	NA	NA	NA
I	I:2514546	2514546	C	T	0.308917	0.0580375	0.0809408	0.473352	0.32481578356798607	Mean number of eggs in utero	4.342193628794542	0	NA	NA	NA	NA	NA	NA	NA	NA	NA
I	I:2520580	2520580	C	T	0.280255	-0.0444581	0.0826709	0.590735	0.22860729720288955	Mean number of eggs in utero	4.342193628794542	0	NA	NA	NA	NA	NA	NA	NA	NA	NA
I	I:2522142	2522142	A	C	0.235669	-0.156314	0.0836363	0.0616263	1.2102339062238978	Mean number of eggs in utero	4.342193628794542	0	NA	NA	NA	NA	NA	NA	NA	NA	NA
I	I:2529627	2529627	A	C	0.0828025	-0.151444	0.116546	0.193797	0.7126529501620855	Mean number of eggs in utero	4.342193628794542	0	NA	NA	NA	NA	NA	NA	NA	NA	NA
I	I:2529830	2529830	G	A	0.0764331	0.176267	0.11977	0.141098	0.8504791421288534	Mean number of eggs in utero	4.342193628794542	0	NA	NA	NA	NA	NA	NA	NA	NA	NA
I	I:2534039	2534039	T	A	0.398089	0.0232016	0.0759877	0.760112	0.11912241114256009	Mean number of eggs in utero	4.342193628794542	0	NA	NA	NA	NA	NA	NA	NA	NA	NA
I	I:2534153	2534153	A	T	0.455414	0.0634375	0.0796064	0.425515	0.37108512582050723	Mean number of eggs in utero	4.342193628794542	0	NA	NA	NA	NA	NA	NA	NA	NA	NA
I	I:2535596	2535596	C	T	0.343949	0.0577433	0.0744951	0.438264	0.35826420181572316	Mean number of eggs in utero	4.342193628794542	0	NA	NA	NA	NA	NA	NA	NA	NA	NA
I	I:2535798	2535798	G	A	0.191083	-0.0742728	0.100238	0.458716	0.3384561114256289	Mean number of eggs in utero	4.342193628794542	0	NA	NA	NA	NA	NA	NA	NA	NA	NA
I	I:2545533	2545533	A	C	0.44586	0.0485283	0.0731098	0.506836	0.2951325452367392	Mean number of eggs in utero	4.342193628794542	0	NA	NA	NA	NA	NA	NA	NA	NA	NA
I	I:2546154	2546154	C	A	0.181529	-0.13134	0.100866	0.192876	0.7147218092458086	Mean number of eggs in utero	4.342193628794542	0	NA	NA	NA	NA	NA	NA	NA	NA	NA
I	I:2551409	2551409	A	G	0.133758	0.0633365	0.0976977	0.516797	0.2866800160795887	Mean number of eggs in utero	4.342193628794542	0	NA	NA	NA	NA	NA	NA	NA	NA	NA
I	I:2556319	2556319	A	G	0.452229	0.0304968	0.0812476	0.707395	0.15033801418494222	Mean number of eggs in utero	4.342193628794542	0	NA	NA	NA	NA	NA	NA	NA	NA	NA
I	I:2557214	2557214	C	T	0.16242	-0.0989645	0.102852	0.335949	0.4737266473116425	Mean number of eggs in utero	4.342193628794542	0	NA	NA	NA	NA	NA	NA	NA	NA	NA
I	I:2561952	2561952	C	T	0.312102	0.108559	0.0786049	0.167255	0.7766208903616241	Mean number of eggs in utero	4.342193628794542	0	NA	NA	NA	NA	NA	NA	NA	NA	NA
I	I:2562176	2562176	A	C	0.16242	-0.0421337	0.0903452	0.640955	0.19317246024360582	Mean number of eggs in utero	4.342193628794542	0	NA	NA	NA	NA	NA	NA	NA	NA	NA
I	I:2565493	2565493	C	G	0.0732484	-0.0229863	0.128477	0.858005	0.06651018130504466	Mean number of eggs in utero	4.342193628794542	0	NA	NA	NA	NA	NA	NA	NA	NA	NA
I	I:2566152	2566152	T	C	0.449045	-0.0427439	0.0781417	0.584375	0.233308371783407	Mean number of eggs in utero	4.342193628794542	0	NA	NA	NA	NA	NA	NA	NA	NA	NA
I	I:2569989	2569989	A	G	0.0509554	0.181176	0.237474	0.445506	0.35114644258256245	Mean number of eggs in utero	4.342193628794542	0	NA	NA	NA	NA	NA	NA	NA	NA	NA
I	I:2571357	2571357	G	A	0.0605096	-0.139858	0.147671	0.343592	0.4639569565878918	Mean number of eggs in utero	4.342193628794542	0	NA	NA	NA	NA	NA	NA	NA	NA	NA
I	I:2571411	2571411	G	A	0.0605096	0.00792971	0.124316	0.94914	0.022669723565229796	Mean number of eggs in utero	4.342193628794542	0	NA	NA	NA	NA	NA	NA	NA	NA	NA
I	I:2578542	2578542	T	C	0.0636943	0.0103476	0.122598	0.932736	0.030241260827338644	Mean number of eggs in utero	4.342193628794542	0	NA	NA	NA	NA	NA	NA	NA	NA	NA
I	I:2579235	2579235	T	C	0.273885	-0.127361	0.077155	0.0987966	1.0052580010261993	Mean number of eggs in utero	4.342193628794542	0	NA	NA	NA	NA	NA	NA	NA	NA	NA
I	I:2579871	2579871	T	A	0.159236	-0.110715	0.104766	0.290608	0.5366924344012702	Mean number of eggs in utero	4.342193628794542	0	NA	NA	NA	NA	NA	NA	NA	NA	NA
I	I:2580088	2580088	A	T	0.270701	-0.0432724	0.083092	0.602522	0.2200270909868409	Mean number of eggs in utero	4.342193628794542	0	NA	NA	NA	NA	NA	NA	NA	NA	NA
I	I:2580256	2580256	G	A	0.410828	0.128703	0.0704992	0.0679116	1.1680560374174338	Mean number of eggs in utero	4.342193628794542	0	NA	NA	NA	NA	NA	NA	NA	NA	NA
I	I:2591578	2591578	C	T	0.16242	-0.0497044	0.0977454	0.611097	0.21388984831526386	Mean number of eggs in utero	4.342193628794542	0	NA	NA	NA	NA	NA	NA	NA	NA	NA
I	I:2592355	2592355	A	G	0.429936	0.0424142	0.0755218	0.574378	0.24080220292588622	Mean number of eggs in utero	4.342193628794542	0	NA	NA	NA	NA	NA	NA	NA	NA	NA
I	I:2594098	2594098	A	C	0.156051	-0.108339	0.0976862	0.267406	0.5728288523557945	Mean number of eggs in utero	4.342193628794542	0	NA	NA	NA	NA	NA	NA	NA	NA	NA
I	I:2597535	2597535	C	G	0.0796178	0.148929	0.11749	0.204943	0.6883669107863214	Mean number of eggs in utero	4.342193628794542	0	NA	NA	NA	NA	NA	NA	NA	NA	NA
I	I:2600035	2600035	G	T	0.449045	0.0110529	0.0737385	0.880849	0.055098534365883634	Mean number of eggs in utero	4.342193628794542	0	NA	NA	NA	NA	NA	NA	NA	NA	NA
I	I:2604369	2604369	A	G	0.394904	-0.0284876	0.0798762	0.721356	0.1418503515380038	Mean number of eggs in utero	4.342193628794542	0	NA	NA	NA	NA	NA	NA	NA	NA	NA
I	I:2608323	2608323	C	T	0.152866	-0.0994035	0.103605	0.337336	0.4719373090714921	Mean number of eggs in utero	4.342193628794542	0	NA	NA	NA	NA	NA	NA	NA	NA	NA
I	I:2608857	2608857	C	T	0.22293	-0.0636271	0.101291	0.529896	0.2758093588107964	Mean number of eggs in utero	4.342193628794542	0	NA	NA	NA	NA	NA	NA	NA	NA	NA
I	I:2615044	2615044	T	A	0.181529	0.0115979	0.111397	0.91708	0.03759277769627231	Mean number of eggs in utero	4.342193628794542	0	NA	NA	NA	NA	NA	NA	NA	NA	NA
I	I:2617453	2617453	A	G	0.121019	-0.0331523	0.119512	0.781475	0.10708491084468359	Mean number of eggs in utero	4.342193628794542	0	NA	NA	NA	NA	NA	NA	NA	NA	NA
I	I:2621984	2621984	C	T	0.149682	0.0550636	0.10627	0.604356	0.21870716189224204	Mean number of eggs in utero	4.342193628794542	0	NA	NA	NA	NA	NA	NA	NA	NA	NA
I	I:2626847	2626847	A	G	0.496815	-0.0327011	0.0793251	0.680162	0.1673876353425975	Mean number of eggs in utero	4.342193628794542	0	NA	NA	NA	NA	NA	NA	NA	NA	NA
I	I:2638782	2638782	A	G	0.321656	-0.045707	0.0785233	0.560511	0.2514158599781533	Mean number of eggs in utero	4.342193628794542	0	NA	NA	NA	NA	NA	NA	NA	NA	NA
I	I:2643819	2643819	A	G	0.194268	-0.0683879	0.0939746	0.46678	0.33088776032957323	Mean number of eggs in utero	4.342193628794542	0	NA	NA	NA	NA	NA	NA	NA	NA	NA
I	I:2652934	2652934	G	T	0.0541401	0.0661841	0.171539	0.699626	0.15513405933242255	Mean number of eggs in utero	4.342193628794542	0	NA	NA	NA	NA	NA	NA	NA	NA	NA
I	I:2659668	2659668	A	G	0.43949	-0.0166522	0.0768669	0.828492	0.08171168081450507	Mean number of eggs in utero	4.342193628794542	0	NA	NA	NA	NA	NA	NA	NA	NA	NA
I	I:2660253	2660253	A	C	0.11465	-0.0214448	0.123459	0.862101	0.06444185114381468	Mean number of eggs in utero	4.342193628794542	0	NA	NA	NA	NA	NA	NA	NA	NA	NA
I	I:2670882	2670882	A	T	0.0796178	0.227077	0.196919	0.24885	0.6040623549199581	Mean number of eggs in utero	4.342193628794542	0	NA	NA	NA	NA	NA	NA	NA	NA	NA
I	I:2679492	2679492	C	G	0.111465	0.0510655	0.0999892	0.609554	0.21498781447021353	Mean number of eggs in utero	4.342193628794542	0	NA	NA	NA	NA	NA	NA	NA	NA	NA
I	I:2681368	2681368	G	A	0.0859873	0.112536	0.192022	0.557838	0.25349190486344375	Mean number of eggs in utero	4.342193628794542	0	NA	NA	NA	NA	NA	NA	NA	NA	NA
I	I:2682085	2682085	A	G	0.066879	0.326175	0.203146	0.108358	0.9651390194840123	Mean number of eggs in utero	4.342193628794542	0	NA	NA	NA	NA	NA	NA	NA	NA	NA
I	I:2683510	2683510	C	G	0.372611	-0.0129093	0.0789433	0.870104	0.060428834821934785	Mean number of eggs in utero	4.342193628794542	0	NA	NA	NA	NA	NA	NA	NA	NA	NA
I	I:2688866	2688866	A	C	0.191083	-0.0689675	0.0946888	0.466394	0.33124704526373466	Mean number of eggs in utero	4.342193628794542	0	NA	NA	NA	NA	NA	NA	NA	NA	NA
I	I:2690596	2690596	T	A	0.0605096	-0.106865	0.13401	0.425197	0.37140980832569753	Mean number of eggs in utero	4.342193628794542	0	NA	NA	NA	NA	NA	NA	NA	NA	NA
I	I:2693131	2693131	A	C	0.496815	0.0273026	0.0796751	0.731844	0.13558148336709797	Mean number of eggs in utero	4.342193628794542	0	NA	NA	NA	NA	NA	NA	NA	NA	NA
I	I:2702880	2702880	G	A	0.0732484	0.0355592	0.272613	0.89622	0.04758536862123441	Mean number of eggs in utero	4.342193628794542	0	NA	NA	NA	NA	NA	NA	NA	NA	NA
I	I:2704709	2704709	G	A	0.10828	0.0119126	0.173192	0.945163	0.024493287896998627	Mean number of eggs in utero	4.342193628794542	0	NA	NA	NA	NA	NA	NA	NA	NA	NA
I	I:2707175	2707175	G	A	0.0732484	-0.132455	0.148023	0.370881	0.43076541473424923	Mean number of eggs in utero	4.342193628794542	0	NA	NA	NA	NA	NA	NA	NA	NA	NA
I	I:2707204	2707204	T	A	0.0828025	0.0896416	0.114613	0.434143	0.36236719702730164	Mean number of eggs in utero	4.342193628794542	0	NA	NA	NA	NA	NA	NA	NA	NA	NA
I	I:2707271	2707271	G	A	0.302548	-0.0280203	0.0799418	0.725957	0.13908910273762148	Mean number of eggs in utero	4.342193628794542	0	NA	NA	NA	NA	NA	NA	NA	NA	NA
I	I:2708044	2708044	T	C	0.105096	0.133918	0.123122	0.276733	0.5579390487977876	Mean number of eggs in utero	4.342193628794542	0	NA	NA	NA	NA	NA	NA	NA	NA	NA
I	I:2709500	2709500	C	T	0.0796178	0.00357347	0.202925	0.98595	0.006145108663951008	Mean number of eggs in utero	4.342193628794542	0	NA	NA	NA	NA	NA	NA	NA	NA	NA
I	I:2725259	2725259	A	G	0.324841	0.0126023	0.0815588	0.877202	0.05690038681214623	Mean number of eggs in utero	4.342193628794542	0	NA	NA	NA	NA	NA	NA	NA	NA	NA
I	I:2725969	2725969	T	A	0.101911	-0.0289992	0.151935	0.848631	0.07128110775319287	Mean number of eggs in utero	4.342193628794542	0	NA	NA	NA	NA	NA	NA	NA	NA	NA
I	I:2731652	2731652	C	T	0.5	-0.023452	0.0767674	0.759989	0.11919269360588415	Mean number of eggs in utero	4.342193628794542	0	NA	NA	NA	NA	NA	NA	NA	NA	NA
I	I:2733130	2733130	G	A	0.117834	0.249871	0.179411	0.163702	0.7859460146402402	Mean number of eggs in utero	4.342193628794542	0	NA	NA	NA	NA	NA	NA	NA	NA	NA
I	I:2735552	2735552	C	T	0.484076	-0.00254311	0.0735705	0.972425	0.01214388444153524	Mean number of eggs in utero	4.342193628794542	0	NA	NA	NA	NA	NA	NA	NA	NA	NA
I	I:2735588	2735588	C	G	0.426752	-0.0449889	0.0749481	0.548328	0.2609595765950698	Mean number of eggs in utero	4.342193628794542	0	NA	NA	NA	NA	NA	NA	NA	NA	NA
I	I:2735653	2735653	T	C	0.0859873	0.0347497	0.133314	0.794354	0.09998591320929301	Mean number of eggs in utero	4.342193628794542	0	NA	NA	NA	NA	NA	NA	NA	NA	NA
I	I:2741877	2741877	A	C	0.426752	-0.0690041	0.0792855	0.384123	0.41552968795580625	Mean number of eggs in utero	4.342193628794542	0	NA	NA	NA	NA	NA	NA	NA	NA	NA
I	I:2745811	2745811	G	A	0.11465	-0.016665	0.105088	0.873999	0.05848906427032279	Mean number of eggs in utero	4.342193628794542	0	NA	NA	NA	NA	NA	NA	NA	NA	NA
I	I:2746293	2746293	C	T	0.0796178	0.475224	0.210509	0.0239771	1.6202033454306286	Mean number of eggs in utero	4.342193628794542	0	NA	NA	NA	NA	NA	NA	NA	NA	NA
I	I:2747038	2747038	T	C	0.101911	-0.0296867	0.134204	0.824932	0.0835818493190612	Mean number of eggs in utero	4.342193628794542	0	NA	NA	NA	NA	NA	NA	NA	NA	NA
I	I:2747057	2747057	G	A	0.0987261	0.249328	0.19051	0.190623	0.7198246998653114	Mean number of eggs in utero	4.342193628794542	0	NA	NA	NA	NA	NA	NA	NA	NA	NA
I	I:2748252	2748252	G	A	0.0605096	0.221293	0.331014	0.503796	0.29774528500151026	Mean number of eggs in utero	4.342193628794542	0	NA	NA	NA	NA	NA	NA	NA	NA	NA
I	I:2751119	2751119	C	G	0.496815	0.00487971	0.0750929	0.948188	0.023105545290802446	Mean number of eggs in utero	4.342193628794542	0	NA	NA	NA	NA	NA	NA	NA	NA	NA
I	I:2754010	2754010	G	A	0.0636943	0.128938	0.16682	0.439569	0.35697294319045375	Mean number of eggs in utero	4.342193628794542	0	NA	NA	NA	NA	NA	NA	NA	NA	NA
I	I:2756179	2756179	T	G	0.471338	0.0853374	0.0783917	0.276329	0.5585735346308278	Mean number of eggs in utero	4.342193628794542	0	NA	NA	NA	NA	NA	NA	NA	NA	NA
I	I:2758220	2758220	G	A	0.496815	0.140076	0.0805484	0.0820308	1.0860230529999084	Mean number of eggs in utero	4.342193628794542	0	NA	NA	NA	NA	NA	NA	NA	NA	NA
I	I:2759693	2759693	G	A	0.44586	0.0644578	0.0805865	0.423793	0.37284622102418674	Mean number of eggs in utero	4.342193628794542	0	NA	NA	NA	NA	NA	NA	NA	NA	NA
I	I:2767728	2767728	A	C	0.496815	-0.0266597	0.0752243	0.723037	0.1408394779687108	Mean number of eggs in utero	4.342193628794542	0	NA	NA	NA	NA	NA	NA	NA	NA	NA
I	I:2769417	2769417	T	C	0.111465	0.220686	0.151774	0.145934	0.8358435135065256	Mean number of eggs in utero	4.342193628794542	0	NA	NA	NA	NA	NA	NA	NA	NA	NA
I	I:2775225	2775225	A	G	0.0636943	0.0262972	0.189717	0.889756	0.05072907468336852	Mean number of eggs in utero	4.342193628794542	0	NA	NA	NA	NA	NA	NA	NA	NA	NA
I	I:2775396	2775396	C	T	0.089172	0.06401	0.144539	0.65787	0.1818599177242939	Mean number of eggs in utero	4.342193628794542	0	NA	NA	NA	NA	NA	NA	NA	NA	NA
I	I:2776274	2776274	T	C	0.490446	0.0441313	0.0760388	0.561659	0.2505272776080065	Mean number of eggs in utero	4.342193628794542	0	NA	NA	NA	NA	NA	NA	NA	NA	NA
I	I:2787161	2787161	T	C	0.398089	-0.044452	0.0764708	0.561042	0.25100462593549727	Mean number of eggs in utero	4.342193628794542	0	NA	NA	NA	NA	NA	NA	NA	NA	NA
I	I:2789743	2789743	G	C	0.066879	0.154942	0.252108	0.538827	0.2685506504078131	Mean number of eggs in utero	4.342193628794542	0	NA	NA	NA	NA	NA	NA	NA	NA	NA
I	I:2795665	2795665	G	A	0.133758	-0.0015468	0.0981542	0.987427	0.0054950016954891275	Mean number of eggs in utero	4.342193628794542	0	NA	NA	NA	NA	NA	NA	NA	NA	NA
I	I:2798340	2798340	G	A	0.121019	0.0875736	0.114148	0.442966	0.35362960691249534	Mean number of eggs in utero	4.342193628794542	0	NA	NA	NA	NA	NA	NA	NA	NA	NA
I	I:2804940	2804940	A	G	0.366242	-0.00778527	0.0787642	0.921263	0.035616370732967806	Mean number of eggs in utero	4.342193628794542	0	NA	NA	NA	NA	NA	NA	NA	NA	NA
I	I:2818332	2818332	A	G	0.203822	0.0371786	0.0926046	0.68807	0.16236737707365256	Mean number of eggs in utero	4.342193628794542	0	NA	NA	NA	NA	NA	NA	NA	NA	NA
I	I:2819570	2819570	A	T	0.5	-0.0396849	0.0793135	0.616826	0.20983732850679576	Mean number of eggs in utero	4.342193628794542	0	NA	NA	NA	NA	NA	NA	NA	NA	NA
I	I:2820424	2820424	T	A	0.0923567	-0.0285778	0.144109	0.842805	0.07427289657370449	Mean number of eggs in utero	4.342193628794542	0	NA	NA	NA	NA	NA	NA	NA	NA	NA
I	I:2821835	2821835	G	T	0.0764331	-0.0451321	0.217242	0.83542400000000006	0.07809305251134813	Mean number of eggs in utero	4.342193628794542	0	NA	NA	NA	NA	NA	NA	NA	NA	NA
I	I:2823448	2823448	T	C	0.219745	0.0268243	0.0956904	0.779229	0.10833489300622304	Mean number of eggs in utero	4.342193628794542	0	NA	NA	NA	NA	NA	NA	NA	NA	NA
I	I:2831738	2831738	A	T	0.0509554	0.290914	0.22983	0.205593	0.686991676219206	Mean number of eggs in utero	4.342193628794542	0	NA	NA	NA	NA	NA	NA	NA	NA	NA
I	I:2835977	2835977	T	A	0.066879	0.189502	0.319915	0.553615	0.25679215133855504	Mean number of eggs in utero	4.342193628794542	0	NA	NA	NA	NA	NA	NA	NA	NA	NA
I	I:2838116	2838116	G	A	0.066879	-0.101902	0.180068	0.571456	0.24301720305145436	Mean number of eggs in utero	4.342193628794542	0	NA	NA	NA	NA	NA	NA	NA	NA	NA
I	I:2839645	2839645	A	C	0.089172	-0.206837	0.162624	0.203419	0.6916084849935045	Mean number of eggs in utero	4.342193628794542	0	NA	NA	NA	NA	NA	NA	NA	NA	NA
I	I:2839737	2839737	G	A	0.296178	-0.00875045	0.0845881	0.917608	0.03734280877210053	Mean number of eggs in utero	4.342193628794542	0	NA	NA	NA	NA	NA	NA	NA	NA	NA
I	I:2850956	2850956	T	A	0.210191	0.0536375	0.0997996	0.590956	0.2284448535833314	Mean number of eggs in utero	4.342193628794542	0	NA	NA	NA	NA	NA	NA	NA	NA	NA
I	I:2852511	2852511	C	T	0.496815	0.0260197	0.0808307	0.747526	0.12637369737121512	Mean number of eggs in utero	4.342193628794542	0	NA	NA	NA	NA	NA	NA	NA	NA	NA
I	I:2853836	2853836	T	G	0.0732484	-0.142	0.149298	0.341545	0.4665520680756375	Mean number of eggs in utero	4.342193628794542	0	NA	NA	NA	NA	NA	NA	NA	NA	NA
I	I:2855562	2855562	T	G	0.0636943	0.110287	0.171518	0.520221	0.2838121204215029	Mean number of eggs in utero	4.342193628794542	0	NA	NA	NA	NA	NA	NA	NA	NA	NA
I	I:2866468	2866468	T	C	0.0796178	0.0575676	0.213376	0.787319	0.10384926780656492	Mean number of eggs in utero	4.342193628794542	0	NA	NA	NA	NA	NA	NA	NA	NA	NA
I	I:2868248	2868248	A	G	0.33758	-0.0328744	0.0799668	0.680999	0.1668535258181998	Mean number of eggs in utero	4.342193628794542	0	NA	NA	NA	NA	NA	NA	NA	NA	NA
I	I:2878983	2878983	T	A	0.0509554	-0.0861695	0.184129	0.639796	0.19395847944940783	Mean number of eggs in utero	4.342193628794542	0	NA	NA	NA	NA	NA	NA	NA	NA	NA
I	I:2879170	2879170	G	A	0.404459	0.0621014	0.0838217	0.458769	0.33840593598392366	Mean number of eggs in utero	4.342193628794542	0	NA	NA	NA	NA	NA	NA	NA	NA	NA
I	I:2887630	2887630	C	T	0.105096	0.0230617	0.126585	0.855439	0.06781095387030774	Mean number of eggs in utero	4.342193628794542	0	NA	NA	NA	NA	NA	NA	NA	NA	NA
I	I:2888630	2888630	C	A	0.152866	0.0142452	0.105209	0.892296	0.049491053872482996	Mean number of eggs in utero	4.342193628794542	0	NA	NA	NA	NA	NA	NA	NA	NA	NA
I	I:2889996	2889996	T	A	0.0636943	0.254361	0.36667	0.487866	0.31169944736611827	Mean number of eggs in utero	4.342193628794542	0	NA	NA	NA	NA	NA	NA	NA	NA	NA
I	I:2895875	2895875	T	A	0.133758	0.0365863	0.109967	0.739359	0.13114463621821756	Mean number of eggs in utero	4.342193628794542	0	NA	NA	NA	NA	NA	NA	NA	NA	NA
I	I:2895884	2895884	A	C	0.203822	0.00825547	0.0909694	0.927691	0.03259665669270391	Mean number of eggs in utero	4.342193628794542	0	NA	NA	NA	NA	NA	NA	NA	NA	NA
I	I:2895898	2895898	T	G	0.0573248	0.249184	0.243486	0.306117	0.5141125514834121	Mean number of eggs in utero	4.342193628794542	0	NA	NA	NA	NA	NA	NA	NA	NA	NA
I	I:2896967	2896967	T	A	0.356688	0.0603979	0.0811841	0.4569	0.340178841944295	Mean number of eggs in utero	4.342193628794542	0	NA	NA	NA	NA	NA	NA	NA	NA	NA
I	I:2923426	2923426	A	G	0.0796178	-0.0525222	0.196172	0.788903	0.10297639242364164	Mean number of eggs in utero	4.342193628794542	0	NA	NA	NA	NA	NA	NA	NA	NA	NA
I	I:2923930	2923930	C	A	0.216561	0.0927028	0.107008	0.386315	0.41305842856044844	Mean number of eggs in utero	4.342193628794542	0	NA	NA	NA	NA	NA	NA	NA	NA	NA
I	I:2927585	2927585	C	T	0.267516	-0.0644133	0.0807702	0.425167	0.3714404512843893	Mean number of eggs in utero	4.342193628794542	0	NA	NA	NA	NA	NA	NA	NA	NA	NA
I	I:2930071	2930071	A	G	0.159236	0.0710558	0.107881	0.51012	0.2923276489852523	Mean number of eggs in utero	4.342193628794542	0	NA	NA	NA	NA	NA	NA	NA	NA	NA
I	I:2930431	2930431	G	C	0.165605	0.00170452	0.0982554	0.986159	0.00605305741621815	Mean number of eggs in utero	4.342193628794542	0	NA	NA	NA	NA	NA	NA	NA	NA	NA
I	I:2930538	2930538	G	A	0.0636943	-0.0960412	0.132976	0.470146	0.32776725451518357	Mean number of eggs in utero	4.342193628794542	0	NA	NA	NA	NA	NA	NA	NA	NA	NA
I	I:2934201	2934201	C	A	0.0796178	-0.0747769	0.112519	0.506326	0.29556977088175573	Mean number of eggs in utero	4.342193628794542	0	NA	NA	NA	NA	NA	NA	NA	NA	NA
I	I:2940601	2940601	T	G	0.0573248	0.0636813	0.245966	0.79571	0.09924518395534727	Mean number of eggs in utero	4.342193628794542	0	NA	NA	NA	NA	NA	NA	NA	NA	NA
I	I:2940742	2940742	C	T	0.305732	0.0284268	0.080309	0.723363	0.14064370915856447	Mean number of eggs in utero	4.342193628794542	0	NA	NA	NA	NA	NA	NA	NA	NA	NA
I	I:2941401	2941401	A	G	0.216561	0.0374048	0.0907473	0.680203	0.16736145696581864	Mean number of eggs in utero	4.342193628794542	0	NA	NA	NA	NA	NA	NA	NA	NA	NA
I	I:2942829	2942829	T	C	0.101911	-0.0298294	0.104413	0.775117	0.11063273798498276	Mean number of eggs in utero	4.342193628794542	0	NA	NA	NA	NA	NA	NA	NA	NA	NA
I	I:2942901	2942901	A	C	0.143312	-0.00815849	0.102557	0.936594	0.02844862871840385	Mean number of eggs in utero	4.342193628794542	0	NA	NA	NA	NA	NA	NA	NA	NA	NA
I	I:2944266	2944266	G	C	0.178344	-0.111502	0.0963007	0.246926	0.6074331787516124	Mean number of eggs in utero	4.342193628794542	0	NA	NA	NA	NA	NA	NA	NA	NA	NA
I	I:2945162	2945162	T	A	0.0541401	-0.0796531	0.138748	0.56591	0.24725263172919312	Mean number of eggs in utero	4.342193628794542	0	NA	NA	NA	NA	NA	NA	NA	NA	NA
I	I:2949375	2949375	A	G	0.366242	-0.00864238	0.0716419	0.903982	0.04384021706722786	Mean number of eggs in utero	4.342193628794542	0	NA	NA	NA	NA	NA	NA	NA	NA	NA
I	I:2949987	2949987	A	C	0.207006	-0.0557098	0.0864619	0.519363	0.2845289932284717	Mean number of eggs in utero	4.342193628794542	0	NA	NA	NA	NA	NA	NA	NA	NA	NA
I	I:2951462	2951462	T	A	0.127389	-0.0422578	0.0981147	0.666688	0.1760773618546144	Mean number of eggs in utero	4.342193628794542	0	NA	NA	NA	NA	NA	NA	NA	NA	NA
I	I:2952662	2952662	T	C	0.181529	0.0114232	0.0843634	0.892292	0.04949300073969001	Mean number of eggs in utero	4.342193628794542	0	NA	NA	NA	NA	NA	NA	NA	NA	NA
I	I:2954186	2954186	A	G	0.152866	-0.0847542	0.0885244	0.33836	0.47062098371238154	Mean number of eggs in utero	4.342193628794542	0	NA	NA	NA	NA	NA	NA	NA	NA	NA
I	I:2956461	2956461	A	T	0.171975	-0.00974221	0.0937434	0.91723	0.03752174916518358	Mean number of eggs in utero	4.342193628794542	0	NA	NA	NA	NA	NA	NA	NA	NA	NA
I	I:2963870	2963870	T	C	0.156051	0.0731019	0.108905	0.502063	0.2992417831823589	Mean number of eggs in utero	4.342193628794542	0	NA	NA	NA	NA	NA	NA	NA	NA	NA
I	I:2965262	2965262	T	C	0.254777	0.0261934	0.0775233	0.735455	0.1334438951316464	Mean number of eggs in utero	4.342193628794542	0	NA	NA	NA	NA	NA	NA	NA	NA	NA
I	I:2965443	2965443	T	A	0.0636943	-0.0637638	0.124391	0.608225	0.2159357329276507	Mean number of eggs in utero	4.342193628794542	0	NA	NA	NA	NA	NA	NA	NA	NA	NA
I	I:2965551	2965551	C	G	0.471338	-0.0108441	0.0762864	0.886962	0.05209498619288387	Mean number of eggs in utero	4.342193628794542	0	NA	NA	NA	NA	NA	NA	NA	NA	NA
I	I:2966165	2966165	A	G	0.101911	-0.0252015	0.107942	0.815395	0.08863195596832028	Mean number of eggs in utero	4.342193628794542	0	NA	NA	NA	NA	NA	NA	NA	NA	NA
I	I:2972033	2972033	T	G	0.0605096	-0.0437082	0.296553	0.882826	0.0541248849686367	Mean number of eggs in utero	4.342193628794542	0	NA	NA	NA	NA	NA	NA	NA	NA	NA
I	I:2974568	2974568	A	C	0.423567	0.0835974	0.077003	0.277639	0.5565195285084912	Mean number of eggs in utero	4.342193628794542	0	NA	NA	NA	NA	NA	NA	NA	NA	NA
I	I:2975775	2975775	T	C	0.0796178	-0.188337	0.227192	0.407118	0.3902796956361798	Mean number of eggs in utero	4.342193628794542	0	NA	NA	NA	NA	NA	NA	NA	NA	NA
I	I:2977385	2977385	A	G	0.165605	0.105237	0.0871762	0.227366	0.643274478594521	Mean number of eggs in utero	4.342193628794542	0	NA	NA	NA	NA	NA	NA	NA	NA	NA
I	I:2978258	2978258	A	G	0.0955414	-0.0434642	0.129054	0.736274	0.13296053546774755	Mean number of eggs in utero	4.342193628794542	0	NA	NA	NA	NA	NA	NA	NA	NA	NA
I	I:2978797	2978797	T	C	0.216561	0.0506649	0.0795891	0.524398	0.2803389733332503	Mean number of eggs in utero	4.342193628794542	0	NA	NA	NA	NA	NA	NA	NA	NA	NA
I	I:2987265	2987265	G	A	0.197452	-0.00531525	0.0920514	0.953954	0.020472566624858763	Mean number of eggs in utero	4.342193628794542	0	NA	NA	NA	NA	NA	NA	NA	NA	NA
I	I:2994273	2994273	G	A	0.149682	-0.0347984	0.0909554	0.702025	0.15364742181788266	Mean number of eggs in utero	4.342193628794542	0	NA	NA	NA	NA	NA	NA	NA	NA	NA
I	I:2996463	2996463	T	G	0.121019	0.10833	0.122643	0.377077	0.42356995679542114	Mean number of eggs in utero	4.342193628794542	0	NA	NA	NA	NA	NA	NA	NA	NA	NA
I	I:2997678	2997678	T	C	0.484076	0.0258718	0.0735821	0.725135	0.13958113232955513	Mean number of eggs in utero	4.342193628794542	0	NA	NA	NA	NA	NA	NA	NA	NA	NA
I	I:2999342	2999342	A	G	0.187898	-0.0731308	0.0915217	0.424259	0.3723689360253041	Mean number of eggs in utero	4.342193628794542	0	NA	NA	NA	NA	NA	NA	NA	NA	NA
I	I:3000889	3000889	C	A	0.0764331	-0.0729842	0.146001	0.617155	0.2096057481373545	Mean number of eggs in utero	4.342193628794542	0	NA	NA	NA	NA	NA	NA	NA	NA	NA
I	I:3001144	3001144	A	G	0.130573	-6.78467e-5	0.0989843	0.999453	2.3762407771287723e-4	Mean number of eggs in utero	4.342193628794542	0	NA	NA	NA	NA	NA	NA	NA	NA	NA
I	I:3001359	3001359	A	T	0.0955414	-0.0037456	0.126549	0.976388	0.010377566786401725	Mean number of eggs in utero	4.342193628794542	0	NA	NA	NA	NA	NA	NA	NA	NA	NA
I	I:3005983	3005983	G	A	0.066879	-0.122797	0.152712	0.421335	0.3753724628396612	Mean number of eggs in utero	4.342193628794542	0	NA	NA	NA	NA	NA	NA	NA	NA	NA
I	I:3008000	3008000	G	A	0.0700637	-0.0718285	0.148609	0.628855	0.2014494816761479	Mean number of eggs in utero	4.342193628794542	0	NA	NA	NA	NA	NA	NA	NA	NA	NA
I	I:3010357	3010357	A	C	0.378981	-0.0154745	0.0788575	0.844427	0.073437888860894	Mean number of eggs in utero	4.342193628794542	0	NA	NA	NA	NA	NA	NA	NA	NA	NA
I	I:3010749	3010749	T	C	0.203822	-0.00684123	0.0963055	0.943369	0.025318399184383292	Mean number of eggs in utero	4.342193628794542	0	NA	NA	NA	NA	NA	NA	NA	NA	NA
I	I:3010755	3010755	T	C	0.146497	0.0376708	0.105989	0.722274	0.14129801833888087	Mean number of eggs in utero	4.342193628794542	0	NA	NA	NA	NA	NA	NA	NA	NA	NA
I	I:3010773	3010773	C	T	0.101911	-0.0261296	0.107909	0.808667	0.09223027917245846	Mean number of eggs in utero	4.342193628794542	0	NA	NA	NA	NA	NA	NA	NA	NA	NA
I	I:3011974	3011974	A	G	0.27707	-0.00206317	0.091866	0.982082	0.00785224881107754	Mean number of eggs in utero	4.342193628794542	0	NA	NA	NA	NA	NA	NA	NA	NA	NA
I	I:3015031	3015031	T	C	0.200637	0.0405925	0.0919488	0.658874	0.18119762992297214	Mean number of eggs in utero	4.342193628794542	0	NA	NA	NA	NA	NA	NA	NA	NA	NA
I	I:3016051	3016051	A	C	0.426752	0.0338867	0.073523	0.644871	0.19052715294816083	Mean number of eggs in utero	4.342193628794542	0	NA	NA	NA	NA	NA	NA	NA	NA	NA
I	I:3016191	3016191	T	C	0.165605	0.0177061	0.0948011	0.85184	0.06964197054143768	Mean number of eggs in utero	4.342193628794542	0	NA	NA	NA	NA	NA	NA	NA	NA	NA
I	I:3018032	3018032	A	T	0.0700637	0.109933	0.239723	0.646532	0.18940997491430667	Mean number of eggs in utero	4.342193628794542	0	NA	NA	NA	NA	NA	NA	NA	NA	NA
I	I:3028204	3028204	T	C	0.0509554	0.022574	0.216156	0.916825	0.037713552865759344	Mean number of eggs in utero	4.342193628794542	0	NA	NA	NA	NA	NA	NA	NA	NA	NA
I	I:3028647	3028647	A	G	0.0541401	0.147158	0.194933	0.450299	0.3464990174940162	Mean number of eggs in utero	4.342193628794542	0	NA	NA	NA	NA	NA	NA	NA	NA	NA
I	I:3031112	3031112	T	G	0.0987261	-0.0974528	0.166979	0.559473	0.25222086755198914	Mean number of eggs in utero	4.342193628794542	0	NA	NA	NA	NA	NA	NA	NA	NA	NA
I	I:3031258	3031258	A	T	0.066879	-0.140183	0.146205	0.337654	0.47152810106703913	Mean number of eggs in utero	4.342193628794542	0	NA	NA	NA	NA	NA	NA	NA	NA	NA
I	I:3031319	3031319	A	C	0.292994	-0.0430125	0.0776814	0.579781	0.2367360210099299	Mean number of eggs in utero	4.342193628794542	0	NA	NA	NA	NA	NA	NA	NA	NA	NA
I	I:3031428	3031428	G	C	0.194268	0.0125845	0.0922601	0.891503	0.04987719104022103	Mean number of eggs in utero	4.342193628794542	0	NA	NA	NA	NA	NA	NA	NA	NA	NA
I	I:3033062	3033062	C	T	0.16879	-0.108046	0.0913834	0.237071	0.625121568376367	Mean number of eggs in utero	4.342193628794542	0	NA	NA	NA	NA	NA	NA	NA	NA	NA
I	I:3033172	3033172	T	A	0.0700637	-0.170698	0.17207	0.321186	0.4932433932042417	Mean number of eggs in utero	4.342193628794542	0	NA	NA	NA	NA	NA	NA	NA	NA	NA
I	I:3035873	3035873	A	G	0.455414	-0.0791895	0.0754723	0.294062	0.5315610933323534	Mean number of eggs in utero	4.342193628794542	0	NA	NA	NA	NA	NA	NA	NA	NA	NA
I	I:3036027	3036027	A	C	0.111465	-0.0988724	0.0997471	0.321573	0.4927204227446882	Mean number of eggs in utero	4.342193628794542	0	NA	NA	NA	NA	NA	NA	NA	NA	NA
I	I:3037936	3037936	C	T	0.121019	0.10833	0.122643	0.377077	0.42356995679542114	Mean number of eggs in utero	4.342193628794542	0	NA	NA	NA	NA	NA	NA	NA	NA	NA
I	I:3039157	3039157	T	C	0.130573	-0.114343	0.095013	0.228803	0.640538285495691	Mean number of eggs in utero	4.342193628794542	0	NA	NA	NA	NA	NA	NA	NA	NA	NA
I	I:3041064	3041064	T	G	0.378981	-0.0632469	0.0776904	0.415594	0.3813307310515812	Mean number of eggs in utero	4.342193628794542	0	NA	NA	NA	NA	NA	NA	NA	NA	NA
I	I:3042553	3042553	G	A	0.0923567	-0.118373	0.109199	0.278363	0.5553884916323146	Mean number of eggs in utero	4.342193628794542	0	NA	NA	NA	NA	NA	NA	NA	NA	NA
I	I:3042556	3042556	C	A	0.203822	-0.092188	0.0900463	0.305937	0.5143679962938252	Mean number of eggs in utero	4.342193628794542	0	NA	NA	NA	NA	NA	NA	NA	NA	NA
I	I:3047813	3047813	A	T	0.165605	-0.0210331	0.0961532	0.826849	0.08257379450356683	Mean number of eggs in utero	4.342193628794542	0	NA	NA	NA	NA	NA	NA	NA	NA	NA
I	I:3054046	3054046	T	C	0.0605096	0.0511698	0.152764	0.737655	0.13214670948967933	Mean number of eggs in utero	4.342193628794542	0	NA	NA	NA	NA	NA	NA	NA	NA	NA
I	I:3058635	3058635	G	A	0.299363	-0.0778728	0.0788944	0.323618	0.4899673304365679	Mean number of eggs in utero	4.342193628794542	0	NA	NA	NA	NA	NA	NA	NA	NA	NA
I	I:3064995	3064995	G	A	0.200637	-0.0342544	0.088603	0.699048	0.15549300248118983	Mean number of eggs in utero	4.342193628794542	0	NA	NA	NA	NA	NA	NA	NA	NA	NA
I	I:3073760	3073760	G	C	0.143312	-0.0718999	0.103288	0.486362	0.31304036431715077	Mean number of eggs in utero	4.342193628794542	0	NA	NA	NA	NA	NA	NA	NA	NA	NA
I	I:3073761	3073761	C	T	0.0796178	-0.0497933	0.115137	0.6654	0.1769172034671963	Mean number of eggs in utero	4.342193628794542	0	NA	NA	NA	NA	NA	NA	NA	NA	NA
I	I:3074184	3074184	T	A	0.0605096	-0.0128605	0.128521	0.920292	0.03607435323254866	Mean number of eggs in utero	4.342193628794542	0	NA	NA	NA	NA	NA	NA	NA	NA	NA
I	I:3077310	3077310	G	A	0.299363	-0.0218053	0.0832213	0.793309	0.10055761866457817	Mean number of eggs in utero	4.342193628794542	0	NA	NA	NA	NA	NA	NA	NA	NA	NA
I	I:3078199	3078199	T	C	0.101911	-0.00534807	0.102949	0.95857	0.018376167080444355	Mean number of eggs in utero	4.342193628794542	0	NA	NA	NA	NA	NA	NA	NA	NA	NA
I	I:3078696	3078696	T	C	0.111465	-0.17418	0.12789	0.173212	0.761422023674024	Mean number of eggs in utero	4.342193628794542	0	NA	NA	NA	NA	NA	NA	NA	NA	NA
I	I:3079695	3079695	A	G	0.10828	0.0127263	0.102383	0.901077	0.04523809554007366	Mean number of eggs in utero	4.342193628794542	0	NA	NA	NA	NA	NA	NA	NA	NA	NA
I	I:3079880	3079880	T	G	0.0955414	-0.0168795	0.128356	0.895375	0.04799503583332175	Mean number of eggs in utero	4.342193628794542	0	NA	NA	NA	NA	NA	NA	NA	NA	NA
I	I:3080051	3080051	G	C	0.200637	-0.0149822	0.0848993	0.859925	0.06553942492680409	Mean number of eggs in utero	4.342193628794542	0	NA	NA	NA	NA	NA	NA	NA	NA	NA
I	I:3080589	3080589	C	T	0.0509554	-0.16624	0.184866	0.368522	0.4335365805500996	Mean number of eggs in utero	4.342193628794542	0	NA	NA	NA	NA	NA	NA	NA	NA	NA
I	I:3080922	3080922	T	C	0.261146	-0.029879	0.0828624	0.718409	0.14362823560320492	Mean number of eggs in utero	4.342193628794542	0	NA	NA	NA	NA	NA	NA	NA	NA	NA
I	I:3087273	3087273	A	G	0.171975	0.0440834	0.0943077	0.640183	0.19369586268832356	Mean number of eggs in utero	4.342193628794542	0	NA	NA	NA	NA	NA	NA	NA	NA	NA
I	I:3087289	3087289	C	T	0.315287	-0.0122986	0.0811333	0.879514	0.05575724310321686	Mean number of eggs in utero	4.342193628794542	0	NA	NA	NA	NA	NA	NA	NA	NA	NA
I	I:3088147	3088147	C	T	0.0828025	-0.0590602	0.141267	0.675893	0.1701220513773615	Mean number of eggs in utero	4.342193628794542	0	NA	NA	NA	NA	NA	NA	NA	NA	NA
I	I:3088281	3088281	C	A	0.0796178	-0.0307047	0.114188	0.78801	0.1034682711941217	Mean number of eggs in utero	4.342193628794542	0	NA	NA	NA	NA	NA	NA	NA	NA	NA
I	I:3091564	3091564	C	T	0.0605096	0.00764827	0.129686	0.952972	0.02091985951291836	Mean number of eggs in utero	4.342193628794542	0	NA	NA	NA	NA	NA	NA	NA	NA	NA
I	I:3094411	3094411	C	G	0.105096	0.034385400000000003	0.103038	0.738593	0.131594812682575	Mean number of eggs in utero	4.342193628794542	0	NA	NA	NA	NA	NA	NA	NA	NA	NA
I	I:3095801	3095801	T	A	0.449045	-0.0626915	0.0763828	0.411786	0.3853284227158073	Mean number of eggs in utero	4.342193628794542	0	NA	NA	NA	NA	NA	NA	NA	NA	NA
I	I:3107585	3107585	A	G	0.264331	0.0208565	0.0826559	0.800787	0.09648298582106014	Mean number of eggs in utero	4.342193628794542	0	NA	NA	NA	NA	NA	NA	NA	NA	NA
I	I:3108247	3108247	T	C	0.0541401	0.0850785	0.188024	0.650918	0.18647371863696713	Mean number of eggs in utero	4.342193628794542	0	NA	NA	NA	NA	NA	NA	NA	NA	NA
I	I:3110638	3110638	T	A	0.11465	0.00575574	0.108426	0.957665	0.018786384548912006	Mean number of eggs in utero	4.342193628794542	0	NA	NA	NA	NA	NA	NA	NA	NA	NA
I	I:3112967	3112967	T	C	0.347134	-0.0223239	0.0756333	0.767872	0.11471116841467664	Mean number of eggs in utero	4.342193628794542	0	NA	NA	NA	NA	NA	NA	NA	NA	NA
I	I:3113095	3113095	A	T	0.0573248	-0.125194	0.157151	0.425656	0.37094124046137616	Mean number of eggs in utero	4.342193628794542	0	NA	NA	NA	NA	NA	NA	NA	NA	NA
I	I:3114971	3114971	A	C	0.210191	0.010544	0.0894474	0.906163	0.04279367469256964	Mean number of eggs in utero	4.342193628794542	0	NA	NA	NA	NA	NA	NA	NA	NA	NA
I	I:3115946	3115946	T	C	0.0828025	-0.0939897	0.142713	0.510156	0.29229700119709495	Mean number of eggs in utero	4.342193628794542	0	NA	NA	NA	NA	NA	NA	NA	NA	NA
I	I:3116679	3116679	C	T	0.191083	-0.104465	0.0933838	0.263282	0.5795788316189369	Mean number of eggs in utero	4.342193628794542	0	NA	NA	NA	NA	NA	NA	NA	NA	NA
I	I:3117634	3117634	T	C	0.449045	-0.0610981	0.0769457	0.427172	0.3693972219065146	Mean number of eggs in utero	4.342193628794542	0	NA	NA	NA	NA	NA	NA	NA	NA	NA
I	I:3118533	3118533	G	A	0.388535	-0.0617065	0.0750602	0.411023	0.38613387521978726	Mean number of eggs in utero	4.342193628794542	0	NA	NA	NA	NA	NA	NA	NA	NA	NA
I	I:3129222	3129222	A	T	0.0541401	-0.111512	0.130126	0.391469	0.40730262354726415	Mean number of eggs in utero	4.342193628794542	0	NA	NA	NA	NA	NA	NA	NA	NA	NA
I	I:3132901	3132901	T	A	0.324841	-0.074575	0.075604	0.323942	0.4895327408267139	Mean number of eggs in utero	4.342193628794542	0	NA	NA	NA	NA	NA	NA	NA	NA	NA
I	I:3135288	3135288	C	T	0.197452	-0.11113	0.105261	0.291081	0.5359861417424236	Mean number of eggs in utero	4.342193628794542	0	NA	NA	NA	NA	NA	NA	NA	NA	NA
I	I:3136939	3136939	C	A	0.105096	0.105662	0.14869	0.477322	0.3211885483314027	Mean number of eggs in utero	4.342193628794542	0	NA	NA	NA	NA	NA	NA	NA	NA	NA
I	I:3137307	3137307	G	A	0.0732484	0.140664	0.134017	0.293904	0.5317945031886798	Mean number of eggs in utero	4.342193628794542	0	NA	NA	NA	NA	NA	NA	NA	NA	NA
I	I:3139978	3139978	A	G	0.10828	0.0532799	0.119661	0.656134	0.18300745709135097	Mean number of eggs in utero	4.342193628794542	0	NA	NA	NA	NA	NA	NA	NA	NA	NA
I	I:3141089	3141089	T	C	0.10828	-0.197514	0.114256	0.0838621	1.0764342665807582	Mean number of eggs in utero	4.342193628794542	0	NA	NA	NA	NA	NA	NA	NA	NA	NA
I	I:3141314	3141314	A	G	0.146497	-0.106873	0.103559	0.302071	0.5198909666979823	Mean number of eggs in utero	4.342193628794542	0	NA	NA	NA	NA	NA	NA	NA	NA	NA
I	I:3141942	3141942	A	T	0.0573248	0.117232	0.15081	0.436952	0.35956626847599243	Mean number of eggs in utero	4.342193628794542	0	NA	NA	NA	NA	NA	NA	NA	NA	NA
I	I:3143070	3143070	T	C	0.200637	-0.0123569	0.0897592	0.890503	0.05036461311118	Mean number of eggs in utero	4.342193628794542	0	NA	NA	NA	NA	NA	NA	NA	NA	NA
I	I:3147807	3147807	T	A	0.267516	-3.00232e-4	0.0901595	0.997343	0.0011554561425664986	Mean number of eggs in utero	4.342193628794542	0	NA	NA	NA	NA	NA	NA	NA	NA	NA
I	I:3150370	3150370	G	T	0.328025	0.0053806	0.080527	0.946727	0.023775236927408166	Mean number of eggs in utero	4.342193628794542	0	NA	NA	NA	NA	NA	NA	NA	NA	NA
I	I:3157153	3157153	C	A	0.423567	-0.0604789	0.0773279	0.43415	0.36236019464130204	Mean number of eggs in utero	4.342193628794542	0	NA	NA	NA	NA	NA	NA	NA	NA	NA
I	I:3157585	3157585	A	C	0.302548	4.4096e-4	0.0827437	0.995748	0.0018505572157331758	Mean number of eggs in utero	4.342193628794542	0	NA	NA	NA	NA	NA	NA	NA	NA	NA
I	I:3158376	3158376	T	C	0.0573248	-0.0882546	0.217637	0.685101	0.16424539856707857	Mean number of eggs in utero	4.342193628794542	0	NA	NA	NA	NA	NA	NA	NA	NA	NA
I	I:3159016	3159016	G	C	0.0541401	-0.0476969	0.146441	0.744646	0.1280501390428143	Mean number of eggs in utero	4.342193628794542	0	NA	NA	NA	NA	NA	NA	NA	NA	NA
I	I:3160955	3160955	G	A	0.229299	-0.00694961	0.0835115	0.933679	0.029802409091488798	Mean number of eggs in utero	4.342193628794542	0	NA	NA	NA	NA	NA	NA	NA	NA	NA
I	I:3164951	3164951	G	A	0.0764331	-0.214207	0.128917	0.0965946	1.0150471515943773	Mean number of eggs in utero	4.342193628794542	0	NA	NA	NA	NA	NA	NA	NA	NA	NA
I	I:3173126	3173126	T	A	0.0573248	-0.254615	0.158135	0.107372	0.9691089572854694	Mean number of eggs in utero	4.342193628794542	0	NA	NA	NA	NA	NA	NA	NA	NA	NA
I	I:3173187	3173187	T	C	0.089172	0.0801972	0.133507	0.548043	0.26118536500087475	Mean number of eggs in utero	4.342193628794542	0	NA	NA	NA	NA	NA	NA	NA	NA	NA
I	I:3173877	3173877	A	T	0.0923567	-0.251465	0.120091	0.0362645	1.4405183060345226	Mean number of eggs in utero	4.342193628794542	0	NA	NA	NA	NA	NA	NA	NA	NA	NA
I	I:3179739	3179739	A	G	0.117834	-0.0689849	0.114169	0.545688	0.2630555965028807	Mean number of eggs in utero	4.342193628794542	0	NA	NA	NA	NA	NA	NA	NA	NA	NA
I	I:3186087	3186087	A	G	0.156051	0.0246661	0.0968123	0.798891	0.09751247140911909	Mean number of eggs in utero	4.342193628794542	0	NA	NA	NA	NA	NA	NA	NA	NA	NA
I	I:3188224	3188224	A	G	0.248408	-0.0571215	0.0798197	0.474219	0.32402104962006123	Mean number of eggs in utero	4.342193628794542	0	NA	NA	NA	NA	NA	NA	NA	NA	NA
I	I:3190585	3190585	A	G	0.0828025	-0.101687	0.126826	0.42268	0.3739883012486496	Mean number of eggs in utero	4.342193628794542	0	NA	NA	NA	NA	NA	NA	NA	NA	NA
I	I:3196428	3196428	T	C	0.356688	-0.0294484	0.0775558	0.704164	0.15232618176654023	Mean number of eggs in utero	4.342193628794542	0	NA	NA	NA	NA	NA	NA	NA	NA	NA
I	I:3198250	3198250	C	T	0.0700637	-0.105193	0.223118	0.637306	0.19565199277915618	Mean number of eggs in utero	4.342193628794542	0	NA	NA	NA	NA	NA	NA	NA	NA	NA
I	I:3201673	3201673	T	A	0.146497	0.0660636	0.100457	0.510775	0.2917703675318629	Mean number of eggs in utero	4.342193628794542	0	NA	NA	NA	NA	NA	NA	NA	NA	NA
I	I:3207055	3207055	C	G	0.0923567	0.0992329	0.124621	0.425872	0.37072091274437075	Mean number of eggs in utero	4.342193628794542	0	NA	NA	NA	NA	NA	NA	NA	NA	NA
I	I:3210073	3210073	A	C	0.0509554	-0.101847	0.132773	0.443039	0.35355804185981354	Mean number of eggs in utero	4.342193628794542	0	NA	NA	NA	NA	NA	NA	NA	NA	NA
I	I:3213691	3213691	C	T	0.213376	0.0657377	0.0975923	0.500569	0.30053604954564006	Mean number of eggs in utero	4.342193628794542	0	NA	NA	NA	NA	NA	NA	NA	NA	NA
I	I:3215499	3215499	C	A	0.0541401	-0.0820124	0.222936	0.712967	0.14693057119942854	Mean number of eggs in utero	4.342193628794542	0	NA	NA	NA	NA	NA	NA	NA	NA	NA
I	I:3217328	3217328	A	G	0.175159	0.066392	0.092548	0.473141	0.3250094165630523	Mean number of eggs in utero	4.342193628794542	0	NA	NA	NA	NA	NA	NA	NA	NA	NA
I	I:3218941	3218941	G	T	0.273885	-0.0374862	0.0852375	0.660093	0.18039487272863372	Mean number of eggs in utero	4.342193628794542	0	NA	NA	NA	NA	NA	NA	NA	NA	NA
I	I:3221743	3221743	T	C	0.0605096	-0.0114289	0.28132	0.967594	0.014306833339271748	Mean number of eggs in utero	4.342193628794542	0	NA	NA	NA	NA	NA	NA	NA	NA	NA
I	I:3221811	3221811	T	A	0.10828	-0.194358	0.126297	0.123829	0.9071776342732704	Mean number of eggs in utero	4.342193628794542	0	NA	NA	NA	NA	NA	NA	NA	NA	NA
I	I:3227317	3227317	A	G	0.200637	-0.0356069	0.0866843	0.681245	0.16669667220943438	Mean number of eggs in utero	4.342193628794542	0	NA	NA	NA	NA	NA	NA	NA	NA	NA
I	I:3229764	3229764	A	G	0.0605096	-0.229453	0.152519	0.132473	0.8778726284886318	Mean number of eggs in utero	4.342193628794542	0	NA	NA	NA	NA	NA	NA	NA	NA	NA
I	I:3242515	3242515	A	T	0.127389	0.0222307	0.126009	0.859963	0.06552023392097696	Mean number of eggs in utero	4.342193628794542	0	NA	NA	NA	NA	NA	NA	NA	NA	NA
I	I:3244786	3244786	A	G	0.261146	0.0651839	0.0853634	0.445103	0.3515394785571652	Mean number of eggs in utero	4.342193628794542	0	NA	NA	NA	NA	NA	NA	NA	NA	NA
I	I:3247619	3247619	T	G	0.066879	0.0206349	0.125948	0.86986	0.06055063947338623	Mean number of eggs in utero	4.342193628794542	0	NA	NA	NA	NA	NA	NA	NA	NA	NA
I	I:3248844	3248844	C	T	0.0828025	-0.194455	0.191314	0.309431	0.5094361791482149	Mean number of eggs in utero	4.342193628794542	0	NA	NA	NA	NA	NA	NA	NA	NA	NA
I	I:3251320	3251320	A	G	0.321656	-0.00104133	0.0822932	0.989904	0.004406920848749887	Mean number of eggs in utero	4.342193628794542	0	NA	NA	NA	NA	NA	NA	NA	NA	NA
I	I:3257894	3257894	T	A	0.0732484	0.130593	0.123067	0.288621	0.5396720729226332	Mean number of eggs in utero	4.342193628794542	0	NA	NA	NA	NA	NA	NA	NA	NA	NA
I	I:3258107	3258107	C	T	0.226115	0.0194668	0.0915578	0.831625	0.08007246354589437	Mean number of eggs in utero	4.342193628794542	0	NA	NA	NA	NA	NA	NA	NA	NA	NA
I	I:3260955	3260955	C	T	0.0573248	0.210057	0.140046	0.133638	0.874070032550992	Mean number of eggs in utero	4.342193628794542	0	NA	NA	NA	NA	NA	NA	NA	NA	NA
I	I:3261566	3261566	T	G	0.089172	-0.0801145	0.121456	0.509501	0.29285495926490374	Mean number of eggs in utero	4.342193628794542	0	NA	NA	NA	NA	NA	NA	NA	NA	NA
I	I:3262101	3262101	A	G	0.0796178	-0.160017	0.138331	0.247366	0.60665999357965	Mean number of eggs in utero	4.342193628794542	0	NA	NA	NA	NA	NA	NA	NA	NA	NA
I	I:3264493	3264493	A	T	0.0541401	-0.0797826	0.128632	0.5351	0.2715650490257452	Mean number of eggs in utero	4.342193628794542	0	NA	NA	NA	NA	NA	NA	NA	NA	NA
I	I:3264891	3264891	T	G	0.184713	0.0249813	0.0894356	0.779998	0.10790651088654189	Mean number of eggs in utero	4.342193628794542	0	NA	NA	NA	NA	NA	NA	NA	NA	NA
I	I:3266089	3266089	G	A	0.0987261	0.173109	0.162964	0.288121	0.5404250865590705	Mean number of eggs in utero	4.342193628794542	0	NA	NA	NA	NA	NA	NA	NA	NA	NA
I	I:3267519	3267519	A	G	0.0605096	-0.0366616	0.154694	0.812661	0.09009058175228418	Mean number of eggs in utero	4.342193628794542	0	NA	NA	NA	NA	NA	NA	NA	NA	NA
I	I:3268538	3268538	A	G	0.0764331	0.144182	0.147951	0.329793	0.48175856668312045	Mean number of eggs in utero	4.342193628794542	0	NA	NA	NA	NA	NA	NA	NA	NA	NA
I	I:3269777	3269777	C	T	0.130573	0.0341554	0.0997537	0.732052	0.1354580685168029	Mean number of eggs in utero	4.342193628794542	0	NA	NA	NA	NA	NA	NA	NA	NA	NA
I	I:3274507	3274507	A	G	0.0605096	-0.229453	0.152519	0.132473	0.8778726284886318	Mean number of eggs in utero	4.342193628794542	0	NA	NA	NA	NA	NA	NA	NA	NA	NA
I	I:3281129	3281129	T	C	0.066879	-0.101821	0.334536	0.760851	0.11870038424593972	Mean number of eggs in utero	4.342193628794542	0	NA	NA	NA	NA	NA	NA	NA	NA	NA
I	I:3281882	3281882	T	G	0.0732484	0.0804581	0.121824	0.508969	0.293308668623817	Mean number of eggs in utero	4.342193628794542	0	NA	NA	NA	NA	NA	NA	NA	NA	NA
I	I:3282224	3282224	A	C	0.136943	0.0649667	0.118338	0.583011	0.23432325108278146	Mean number of eggs in utero	4.342193628794542	0	NA	NA	NA	NA	NA	NA	NA	NA	NA
I	I:3284364	3284364	C	A	0.261146	0.0675402	0.0863837	0.434295	0.3622151706030241	Mean number of eggs in utero	4.342193628794542	0	NA	NA	NA	NA	NA	NA	NA	NA	NA
I	I:3287811	3287811	A	T	0.0828025	-0.184851	0.212908	0.385274	0.41423029811787493	Mean number of eggs in utero	4.342193628794542	0	NA	NA	NA	NA	NA	NA	NA	NA	NA
I	I:3290554	3290554	C	A	0.136943	0.0167268	0.100862	0.868284	0.06133820171339425	Mean number of eggs in utero	4.342193628794542	0	NA	NA	NA	NA	NA	NA	NA	NA	NA
I	I:3290751	3290751	A	T	0.200637	0.00764324	0.0993263	0.938663	0.02749030071572117	Mean number of eggs in utero	4.342193628794542	0	NA	NA	NA	NA	NA	NA	NA	NA	NA
I	I:3294475	3294475	G	T	0.0923567	-0.0525213	0.123465	0.670548	0.17357012849247686	Mean number of eggs in utero	4.342193628794542	0	NA	NA	NA	NA	NA	NA	NA	NA	NA
I	I:3295864	3295864	C	T	0.0509554	0.0887124	0.140754	0.528522	0.27693693024918675	Mean number of eggs in utero	4.342193628794542	0	NA	NA	NA	NA	NA	NA	NA	NA	NA
I	I:3297353	3297353	T	A	0.0955414	0.128414	0.119459	0.282393	0.5491460728435049	Mean number of eggs in utero	4.342193628794542	0	NA	NA	NA	NA	NA	NA	NA	NA	NA
I	I:3300306	3300306	G	C	0.0605096	0.152288	0.135648	0.261579	0.58239712483631	Mean number of eggs in utero	4.342193628794542	0	NA	NA	NA	NA	NA	NA	NA	NA	NA
I	I:3301956	3301956	C	T	0.0573248	-0.041264	0.400272	0.917892	0.03720841527295064	Mean number of eggs in utero	4.342193628794542	0	NA	NA	NA	NA	NA	NA	NA	NA	NA
I	I:3305568	3305568	A	G	0.11465	0.0778531	0.135219	0.56478	0.248120690928329	Mean number of eggs in utero	4.342193628794542	0	NA	NA	NA	NA	NA	NA	NA	NA	NA
I	I:3309647	3309647	T	C	0.471338	0.00304796	0.0747287	0.967466	0.014364288605531867	Mean number of eggs in utero	4.342193628794542	0	NA	NA	NA	NA	NA	NA	NA	NA	NA
I	I:3311606	3311606	A	C	0.10828	-0.0785924	0.113944	0.490355	0.30948939197333375	Mean number of eggs in utero	4.342193628794542	0	NA	NA	NA	NA	NA	NA	NA	NA	NA
I	I:3311860	3311860	G	C	0.066879	-0.0342113	0.149032	0.818436	0.08701527585321651	Mean number of eggs in utero	4.342193628794542	0	NA	NA	NA	NA	NA	NA	NA	NA	NA
I	I:3313010	3313010	A	T	0.0764331	-0.0173762	0.130175	0.893811	0.04875430484470819	Mean number of eggs in utero	4.342193628794542	0	NA	NA	NA	NA	NA	NA	NA	NA	NA
I	I:3316474	3316474	T	C	0.133758	0.0819884	0.10256	0.424047	0.3725860049416626	Mean number of eggs in utero	4.342193628794542	0	NA	NA	NA	NA	NA	NA	NA	NA	NA
I	I:3328006	3328006	C	A	0.0636943	0.160915	0.134153	0.230338	0.6376344084147052	Mean number of eggs in utero	4.342193628794542	0	NA	NA	NA	NA	NA	NA	NA	NA	NA
I	I:3331481	3331481	T	C	0.140127	0.101956	0.123025	0.407251	0.39013784061319473	Mean number of eggs in utero	4.342193628794542	0	NA	NA	NA	NA	NA	NA	NA	NA	NA
I	I:3333530	3333530	T	C	0.280255	0.0274286	0.0861478	0.750189	0.12482930818626249	Mean number of eggs in utero	4.342193628794542	0	NA	NA	NA	NA	NA	NA	NA	NA	NA
I	I:3334519	3334519	T	A	0.0605096	-0.0964496	0.122112	0.429617	0.3669185418799226	Mean number of eggs in utero	4.342193628794542	0	NA	NA	NA	NA	NA	NA	NA	NA	NA
I	I:3334992	3334992	T	A	0.0509554	-0.00252061	0.154714	0.987001	0.005682407315913517	Mean number of eggs in utero	4.342193628794542	0	NA	NA	NA	NA	NA	NA	NA	NA	NA
I	I:3342306	3342306	T	C	0.066879	0.133535	0.137113	0.330105	0.481347897493487	Mean number of eggs in utero	4.342193628794542	0	NA	NA	NA	NA	NA	NA	NA	NA	NA
I	I:3347270	3347270	G	T	0.175159	0.0846598	0.0918826	0.356846	0.44751916702436756	Mean number of eggs in utero	4.342193628794542	0	NA	NA	NA	NA	NA	NA	NA	NA	NA
I	I:3349887	3349887	G	A	0.0636943	-0.0732337	0.374584	0.844996	0.07314534688704057	Mean number of eggs in utero	4.342193628794542	0	NA	NA	NA	NA	NA	NA	NA	NA	NA
I	I:3350243	3350243	C	T	0.0796178	-0.0273586	0.220333	0.901181	0.04518797327548327	Mean number of eggs in utero	4.342193628794542	0	NA	NA	NA	NA	NA	NA	NA	NA	NA
I	I:3353281	3353281	C	A	0.200637	0.0445298	0.0879014	0.612444	0.21293361570277397	Mean number of eggs in utero	4.342193628794542	0	NA	NA	NA	NA	NA	NA	NA	NA	NA
I	I:3354678	3354678	G	T	0.0859873	-0.0760854	0.130647	0.560314	0.2515685261192832	Mean number of eggs in utero	4.342193628794542	0	NA	NA	NA	NA	NA	NA	NA	NA	NA
I	I:3355885	3355885	T	A	0.334395	-0.0593967	0.0841163	0.48011	0.31865924820790137	Mean number of eggs in utero	4.342193628794542	0	NA	NA	NA	NA	NA	NA	NA	NA	NA
I	I:3356352	3356352	A	T	0.156051	-0.123396	0.121356	0.309246	0.5096959091253979	Mean number of eggs in utero	4.342193628794542	0	NA	NA	NA	NA	NA	NA	NA	NA	NA
I	I:3356827	3356827	C	T	0.273885	0.0111708	0.0871981	0.898063	0.04669319608029847	Mean number of eggs in utero	4.342193628794542	0	NA	NA	NA	NA	NA	NA	NA	NA	NA
I	I:3357563	3357563	T	C	0.0636943	-0.0807789	0.154483	0.601045	0.2210930113249316	Mean number of eggs in utero	4.342193628794542	0	NA	NA	NA	NA	NA	NA	NA	NA	NA
I	I:3367602	3367602	A	T	0.117834	0.111647	0.106476	0.294379	0.5310931743257539	Mean number of eggs in utero	4.342193628794542	0	NA	NA	NA	NA	NA	NA	NA	NA	NA
I	I:3369462	3369462	G	A	0.0605096	-0.229453	0.152519	0.132473	0.8778726284886318	Mean number of eggs in utero	4.342193628794542	0	NA	NA	NA	NA	NA	NA	NA	NA	NA
I	I:3373419	3373419	A	G	0.210191	-0.177224	0.101845	0.0818372	1.0870492381100676	Mean number of eggs in utero	4.342193628794542	0	NA	NA	NA	NA	NA	NA	NA	NA	NA
I	I:3375581	3375581	T	A	0.0509554	0.218848	0.309737	0.479839	0.3189044566673558	Mean number of eggs in utero	4.342193628794542	0	NA	NA	NA	NA	NA	NA	NA	NA	NA
I	I:3383562	3383562	A	T	0.178344	-0.139195	0.0918962	0.129848	0.8865647352580366	Mean number of eggs in utero	4.342193628794542	0	NA	NA	NA	NA	NA	NA	NA	NA	NA
I	I:3385279	3385279	G	A	0.324841	-0.056863	0.0841593	0.499257	0.30167583724331665	Mean number of eggs in utero	4.342193628794542	0	NA	NA	NA	NA	NA	NA	NA	NA	NA
I	I:3394859	3394859	T	C	0.146497	-0.185079	0.102901	0.0720799	1.142185824546728	Mean number of eggs in utero	4.342193628794542	0	NA	NA	NA	NA	NA	NA	NA	NA	NA
I	I:3396263	3396263	A	T	0.0605096	-0.229453	0.152519	0.132473	0.8778726284886318	Mean number of eggs in utero	4.342193628794542	0	NA	NA	NA	NA	NA	NA	NA	NA	NA
I	I:3397547	3397547	G	C	0.0732484	-0.19097	0.158194	0.227359	0.6432878495830243	Mean number of eggs in utero	4.342193628794542	0	NA	NA	NA	NA	NA	NA	NA	NA	NA
I	I:3398014	3398014	A	G	0.152866	-0.12849	0.100691	0.201928	0.6948034561808554	Mean number of eggs in utero	4.342193628794542	0	NA	NA	NA	NA	NA	NA	NA	NA	NA
I	I:3398967	3398967	C	A	0.264331	-0.152719	0.0919148	0.0966065	1.0149936518540428	Mean number of eggs in utero	4.342193628794542	0	NA	NA	NA	NA	NA	NA	NA	NA	NA
I	I:3399040	3399040	G	T	0.175159	-0.132887	0.099916	0.183523	0.736309500092346	Mean number of eggs in utero	4.342193628794542	0	NA	NA	NA	NA	NA	NA	NA	NA	NA
I	I:3399293	3399293	G	T	0.0509554	0.249278	0.151415	0.0996983	1.0013122469733367	Mean number of eggs in utero	4.342193628794542	0	NA	NA	NA	NA	NA	NA	NA	NA	NA
I	I:3399952	3399952	A	G	0.0541401	-0.251328	0.214825	0.242033	0.6161254160822586	Mean number of eggs in utero	4.342193628794542	0	NA	NA	NA	NA	NA	NA	NA	NA	NA
I	I:3402540	3402540	T	C	0.0636943	-0.113424	0.152936	0.458305	0.33884540467848556	Mean number of eggs in utero	4.342193628794542	0	NA	NA	NA	NA	NA	NA	NA	NA	NA
I	I:3402613	3402613	A	T	0.175159	0.00981084	0.0957045	0.91835	0.03699176967086067	Mean number of eggs in utero	4.342193628794542	0	NA	NA	NA	NA	NA	NA	NA	NA	NA
I	I:3403331	3403331	C	T	0.235669	0.00586372	0.0930716	0.949765	0.022383838741090494	Mean number of eggs in utero	4.342193628794542	0	NA	NA	NA	NA	NA	NA	NA	NA	NA
I	I:3407492	3407492	T	C	0.066879	0.0682357	0.127725	0.593177	0.2268156967649215	Mean number of eggs in utero	4.342193628794542	0	NA	NA	NA	NA	NA	NA	NA	NA	NA
I	I:3411605	3411605	G	A	0.0605096	-0.0441598	0.334697	0.895032	0.04816143711427653	Mean number of eggs in utero	4.342193628794542	0	NA	NA	NA	NA	NA	NA	NA	NA	NA
I	I:3412353	3412353	C	A	0.324841	-0.0578582	0.0840317	0.49112	0.30881237962775904	Mean number of eggs in utero	4.342193628794542	0	NA	NA	NA	NA	NA	NA	NA	NA	NA
I	I:3413196	3413196	A	G	0.245223	-0.0285835	0.0849484	0.736508	0.13282253145952294	Mean number of eggs in utero	4.342193628794542	0	NA	NA	NA	NA	NA	NA	NA	NA	NA
I	I:3416900	3416900	T	C	0.143312	-0.142386	0.131359	0.278387	0.5553510490905198	Mean number of eggs in utero	4.342193628794542	0	NA	NA	NA	NA	NA	NA	NA	NA	NA
I	I:3416937	3416937	T	C	0.0859873	-0.139857	0.132267	0.290338	0.5370961191449697	Mean number of eggs in utero	4.342193628794542	0	NA	NA	NA	NA	NA	NA	NA	NA	NA
I	I:3422310	3422310	G	T	0.152866	-0.0337282	0.0964183	0.72648	0.138776337331821	Mean number of eggs in utero	4.342193628794542	0	NA	NA	NA	NA	NA	NA	NA	NA	NA
I	I:3425944	3425944	T	C	0.10828	0.00640168	0.106674	0.952146	0.021296452736571887	Mean number of eggs in utero	4.342193628794542	0	NA	NA	NA	NA	NA	NA	NA	NA	NA
I	I:3426142	3426142	T	A	0.146497	-0.0142703	0.109213	0.89604	0.047672602624119535	Mean number of eggs in utero	4.342193628794542	0	NA	NA	NA	NA	NA	NA	NA	NA	NA
I	I:3429798	3429798	G	C	0.0636943	-0.0646477	0.155048	0.676714	0.169594838649008	Mean number of eggs in utero	4.342193628794542	0	NA	NA	NA	NA	NA	NA	NA	NA	NA
I	I:3433252	3433252	C	T	0.324841	-0.066466	0.0837841	0.427602	0.3689602721561209	Mean number of eggs in utero	4.342193628794542	0	NA	NA	NA	NA	NA	NA	NA	NA	NA
I	I:3435469	3435469	G	A	0.0796178	-0.0678987	0.118618	0.56704	0.24638630412906207	Mean number of eggs in utero	4.342193628794542	0	NA	NA	NA	NA	NA	NA	NA	NA	NA
I	I:3436908	3436908	A	C	0.0605096	0.0287707	0.133012	0.828753	0.08157488648329407	Mean number of eggs in utero	4.342193628794542	0	NA	NA	NA	NA	NA	NA	NA	NA	NA
I	I:3437575	3437575	A	T	0.248408	-0.0971446	0.0934742	0.298681	0.5247924033001403	Mean number of eggs in utero	4.342193628794542	0	NA	NA	NA	NA	NA	NA	NA	NA	NA
I	I:3439419	3439419	T	G	0.0955414	-0.114402	0.135963	0.400113	0.39781733780734385	Mean number of eggs in utero	4.342193628794542	0	NA	NA	NA	NA	NA	NA	NA	NA	NA
I	I:3440303	3440303	T	C	0.121019	-0.174452	0.11909	0.142956	0.8447976121688298	Mean number of eggs in utero	4.342193628794542	0	NA	NA	NA	NA	NA	NA	NA	NA	NA
I	I:3444563	3444563	T	C	0.216561	-0.0196056	0.095626	0.837554	0.07698718292276616	Mean number of eggs in utero	4.342193628794542	0	NA	NA	NA	NA	NA	NA	NA	NA	NA
I	I:3445426	3445426	A	G	0.0796178	-0.256622	0.207034	0.215154	0.6672505753923517	Mean number of eggs in utero	4.342193628794542	0	NA	NA	NA	NA	NA	NA	NA	NA	NA
I	I:3449032	3449032	A	T	0.121019	-0.00420942	0.106914	0.968594	0.013858225538253123	Mean number of eggs in utero	4.342193628794542	0	NA	NA	NA	NA	NA	NA	NA	NA	NA
I	I:3452648	3452648	G	A	0.382166	-0.0688371	0.0781131	0.378183	0.42229799736334694	Mean number of eggs in utero	4.342193628794542	0	NA	NA	NA	NA	NA	NA	NA	NA	NA
I	I:3452869	3452869	A	G	0.0605096	-0.0847457	0.469001	0.856608	0.06721787397443497	Mean number of eggs in utero	4.342193628794542	0	NA	NA	NA	NA	NA	NA	NA	NA	NA
I	I:3455323	3455323	C	G	0.0732484	-0.0552768	0.141411	0.695876	0.15746814158704234	Mean number of eggs in utero	4.342193628794542	0	NA	NA	NA	NA	NA	NA	NA	NA	NA
I	I:3455692	3455692	T	C	0.219745	-0.0086986	0.0887657	0.921936	0.03529922624741904	Mean number of eggs in utero	4.342193628794542	0	NA	NA	NA	NA	NA	NA	NA	NA	NA
I	I:3466051	3466051	T	G	0.101911	0.0130876	0.120074	0.913206	0.03943124374517171	Mean number of eggs in utero	4.342193628794542	0	NA	NA	NA	NA	NA	NA	NA	NA	NA
I	I:3471641	3471641	C	T	0.328025	-0.091046	0.0848789	0.283425	0.5475618446912854	Mean number of eggs in utero	4.342193628794542	0	NA	NA	NA	NA	NA	NA	NA	NA	NA
I	I:3473157	3473157	T	C	0.117834	-0.0781567	0.118172	0.508368	0.2938217945869692	Mean number of eggs in utero	4.342193628794542	0	NA	NA	NA	NA	NA	NA	NA	NA	NA
I	I:3473790	3473790	A	G	0.0509554	-0.167648	0.14955	0.262281	0.5812331691657557	Mean number of eggs in utero	4.342193628794542	0	NA	NA	NA	NA	NA	NA	NA	NA	NA
I	I:3474343	3474343	C	T	0.111465	-0.166115	0.145181	0.252542	0.5976663844705181	Mean number of eggs in utero	4.342193628794542	0	NA	NA	NA	NA	NA	NA	NA	NA	NA
I	I:3484485	3484485	G	A	0.0987261	-0.126289	0.131525	0.336959	0.47242293935716195	Mean number of eggs in utero	4.342193628794542	0	NA	NA	NA	NA	NA	NA	NA	NA	NA
I	I:3495584	3495584	C	T	0.0859873	-0.177557	0.196751	0.366821	0.4355458095258552	Mean number of eggs in utero	4.342193628794542	0	NA	NA	NA	NA	NA	NA	NA	NA	NA
I	I:3496266	3496266	A	T	0.0605096	-0.0847457	0.469001	0.856608	0.06721787397443497	Mean number of eggs in utero	4.342193628794542	0	NA	NA	NA	NA	NA	NA	NA	NA	NA
I	I:3505604	3505604	A	G	0.210191	-0.0801297	0.0915109	0.381231	0.4188117917127683	Mean number of eggs in utero	4.342193628794542	0	NA	NA	NA	NA	NA	NA	NA	NA	NA
I	I:3508315	3508315	A	G	0.0700637	-0.182829	0.159043	0.250326	0.6014940402435238	Mean number of eggs in utero	4.342193628794542	0	NA	NA	NA	NA	NA	NA	NA	NA	NA
I	I:3508797	3508797	A	G	0.105096	-0.00319715	0.117857	0.978358	0.009502199430229032	Mean number of eggs in utero	4.342193628794542	0	NA	NA	NA	NA	NA	NA	NA	NA	NA
I	I:3508904	3508904	G	C	0.324841	-0.0820595	0.0851915	0.335429	0.47439939254829955	Mean number of eggs in utero	4.342193628794542	0	NA	NA	NA	NA	NA	NA	NA	NA	NA
I	I:3509929	3509929	T	C	0.0541401	-0.078912	0.182313	0.665133	0.17709150448524646	Mean number of eggs in utero	4.342193628794542	0	NA	NA	NA	NA	NA	NA	NA	NA	NA
I	I:3514016	3514016	G	T	0.159236	0.00393978	0.116088	0.972927	0.011919744198787725	Mean number of eggs in utero	4.342193628794542	0	NA	NA	NA	NA	NA	NA	NA	NA	NA
I	I:3514539	3514539	A	G	0.181529	-0.0100447	0.0910473	0.912152	0.039932785289130975	Mean number of eggs in utero	4.342193628794542	0	NA	NA	NA	NA	NA	NA	NA	NA	NA
I	I:3523582	3523582	G	T	0.251592	-0.0571816	0.0858627	0.505433	0.2963364061635719	Mean number of eggs in utero	4.342193628794542	0	NA	NA	NA	NA	NA	NA	NA	NA	NA
I	I:3524078	3524078	C	A	0.175159	-0.130611	0.117539	0.266477	0.5743402695797872	Mean number of eggs in utero	4.342193628794542	0	NA	NA	NA	NA	NA	NA	NA	NA	NA
I	I:3525736	3525736	G	A	0.111465	-0.160983	0.120728	0.182391	0.7389965955403374	Mean number of eggs in utero	4.342193628794542	0	NA	NA	NA	NA	NA	NA	NA	NA	NA
I	I:3528877	3528877	T	G	0.140127	0.0026865	0.100077	0.978584	0.009401889300090777	Mean number of eggs in utero	4.342193628794542	0	NA	NA	NA	NA	NA	NA	NA	NA	NA
I	I:3529064	3529064	T	C	0.101911	-0.124383	0.127835	0.330555	0.48075626928206217	Mean number of eggs in utero	4.342193628794542	0	NA	NA	NA	NA	NA	NA	NA	NA	NA
I	I:3534638	3534638	A	C	0.178344	-0.128567	0.110375	0.244093	0.6124446749251454	Mean number of eggs in utero	4.342193628794542	0	NA	NA	NA	NA	NA	NA	NA	NA	NA
I	I:3538029	3538029	A	T	0.127389	-0.137868	0.112454	0.220203	0.6571767685860174	Mean number of eggs in utero	4.342193628794542	0	NA	NA	NA	NA	NA	NA	NA	NA	NA
I	I:3539083	3539083	A	G	0.197452	-0.00416487	0.101455	0.967255	0.014459016616490477	Mean number of eggs in utero	4.342193628794542	0	NA	NA	NA	NA	NA	NA	NA	NA	NA
I	I:3539818	3539818	A	T	0.461783	-0.0499104	0.0753795	0.507893	0.29422777276369005	Mean number of eggs in utero	4.342193628794542	0	NA	NA	NA	NA	NA	NA	NA	NA	NA
I	I:3539920	3539920	T	C	0.11465	0.0519327	0.111021	0.639946	0.19385667115901212	Mean number of eggs in utero	4.342193628794542	0	NA	NA	NA	NA	NA	NA	NA	NA	NA
I	I:3540265	3540265	C	A	0.324841	-0.0820595	0.0851915	0.335429	0.47439939254829955	Mean number of eggs in utero	4.342193628794542	0	NA	NA	NA	NA	NA	NA	NA	NA	NA
I	I:3540450	3540450	A	T	0.16879	0.0144767	0.107843	0.893213	0.04904496474616693	Mean number of eggs in utero	4.342193628794542	0	NA	NA	NA	NA	NA	NA	NA	NA	NA
I	I:3547145	3547145	C	T	0.0636943	-0.105038	0.369875	0.776424	0.10990104862309959	Mean number of eggs in utero	4.342193628794542	0	NA	NA	NA	NA	NA	NA	NA	NA	NA
I	I:3552248	3552248	T	C	0.105096	-0.0314073	0.12696	0.804614	0.09441241512810525	Mean number of eggs in utero	4.342193628794542	0	NA	NA	NA	NA	NA	NA	NA	NA	NA
I	I:3552854	3552854	T	C	0.165605	-0.0340316	0.100737	0.735495	0.1334202753222981	Mean number of eggs in utero	4.342193628794542	0	NA	NA	NA	NA	NA	NA	NA	NA	NA
I	I:3559865	3559865	T	A	0.133758	-0.174404	0.11328	0.12366	0.9077707578371434	Mean number of eggs in utero	4.342193628794542	0	NA	NA	NA	NA	NA	NA	NA	NA	NA
I	I:3561321	3561321	T	C	0.101911	-0.165882	0.116675	0.1551	0.8093882021863951	Mean number of eggs in utero	4.342193628794542	0	NA	NA	NA	NA	NA	NA	NA	NA	NA
I	I:3565145	3565145	T	A	0.124204	-0.130989	0.116228	0.259743	0.5854561477258855	Mean number of eggs in utero	4.342193628794542	0	NA	NA	NA	NA	NA	NA	NA	NA	NA
I	I:3571927	3571927	T	C	0.213376	-0.159816	0.103894	0.123986	0.9066273508539361	Mean number of eggs in utero	4.342193628794542	0	NA	NA	NA	NA	NA	NA	NA	NA	NA
I	I:3572464	3572464	G	T	0.11465	-0.108093	0.111601	0.332763	0.4778649690073641	Mean number of eggs in utero	4.342193628794542	0	NA	NA	NA	NA	NA	NA	NA	NA	NA
I	I:3573372	3573372	C	T	0.312102	-0.14741	0.0871464	0.0907378	1.042211754709002	Mean number of eggs in utero	4.342193628794542	0	NA	NA	NA	NA	NA	NA	NA	NA	NA
I	I:3574667	3574667	T	C	0.149682	-0.0883963	0.100051	0.376959	0.4237058833275308	Mean number of eggs in utero	4.342193628794542	0	NA	NA	NA	NA	NA	NA	NA	NA	NA
I	I:3576583	3576583	A	G	0.105096	-0.16103	0.124903	0.197315	0.7048398981760532	Mean number of eggs in utero	4.342193628794542	0	NA	NA	NA	NA	NA	NA	NA	NA	NA
I	I:3580667	3580667	A	G	0.175159	-0.146758	0.120275	0.222397	0.6528710754183669	Mean number of eggs in utero	4.342193628794542	0	NA	NA	NA	NA	NA	NA	NA	NA	NA
I	I:3591406	3591406	A	G	0.0955414	-0.0509914	0.127845	0.690002	0.16114965043998383	Mean number of eggs in utero	4.342193628794542	0	NA	NA	NA	NA	NA	NA	NA	NA	NA
I	I:3593090	3593090	G	C	0.16242	-0.0810515	0.119828	0.498788	0.3020840034622855	Mean number of eggs in utero	4.342193628794542	0	NA	NA	NA	NA	NA	NA	NA	NA	NA
I	I:3598596	3598596	A	T	0.133758	0.00630483	0.0921234	0.945436	0.024367864796294915	Mean number of eggs in utero	4.342193628794542	0	NA	NA	NA	NA	NA	NA	NA	NA	NA
I	I:3603753	3603753	C	A	0.066879	-0.112736	0.304402	0.711119	0.1480577175277535	Mean number of eggs in utero	4.342193628794542	0	NA	NA	NA	NA	NA	NA	NA	NA	NA
I	I:3611608	3611608	T	A	0.16242	-0.145938	0.100307	0.145693	0.8365613139431458	Mean number of eggs in utero	4.342193628794542	0	NA	NA	NA	NA	NA	NA	NA	NA	NA
I	I:3618160	3618160	A	G	0.296178	-0.169706	0.0905986	0.0610465	1.2143392305603773	Mean number of eggs in utero	4.342193628794542	0	NA	NA	NA	NA	NA	NA	NA	NA	NA
I	I:3618208	3618208	A	T	0.089172	-0.132924	0.141855	0.348737	0.4575019727749604	Mean number of eggs in utero	4.342193628794542	0	NA	NA	NA	NA	NA	NA	NA	NA	NA
I	I:3618867	3618867	T	A	0.178344	-0.137546	0.0998953	0.168544	0.7732867033226132	Mean number of eggs in utero	4.342193628794542	0	NA	NA	NA	NA	NA	NA	NA	NA	NA
I	I:3619760	3619760	A	C	0.0636943	-0.0266794	0.160388	0.867887	0.061536816840960164	Mean number of eggs in utero	4.342193628794542	0	NA	NA	NA	NA	NA	NA	NA	NA	NA
I	I:3619958	3619958	A	G	0.232484	-0.168154	0.0911264	0.0649957	1.1871153745578358	Mean number of eggs in utero	4.342193628794542	0	NA	NA	NA	NA	NA	NA	NA	NA	NA
I	I:3628613	3628613	A	C	0.0859873	-0.0529498	0.217014	0.807236	0.09299947827174289	Mean number of eggs in utero	4.342193628794542	0	NA	NA	NA	NA	NA	NA	NA	NA	NA
I	I:3631224	3631224	T	A	0.0541401	0.00814091	0.128854	0.949624	0.02244831792051169	Mean number of eggs in utero	4.342193628794542	0	NA	NA	NA	NA	NA	NA	NA	NA	NA
I	I:3632198	3632198	T	C	0.11465	-0.0270323	0.118113	0.818971	0.08673147646053478	Mean number of eggs in utero	4.342193628794542	0	NA	NA	NA	NA	NA	NA	NA	NA	NA
I	I:3636543	3636543	A	T	0.0509554	0.228788	0.147735	0.121469	0.9155345438496172	Mean number of eggs in utero	4.342193628794542	0	NA	NA	NA	NA	NA	NA	NA	NA	NA
I	I:3638826	3638826	G	T	0.0605096	-0.149888	0.179382	0.403392	0.39427271889049786	Mean number of eggs in utero	4.342193628794542	0	NA	NA	NA	NA	NA	NA	NA	NA	NA
I	I:3639748	3639748	T	C	0.066879	0.115534	0.309931	0.709316	0.14916024368546174	Mean number of eggs in utero	4.342193628794542	0	NA	NA	NA	NA	NA	NA	NA	NA	NA
I	I:3660734	3660734	T	A	0.286624	-0.129809	0.0912719	0.154961	0.8097775896748478	Mean number of eggs in utero	4.342193628794542	0	NA	NA	NA	NA	NA	NA	NA	NA	NA
I	I:3662813	3662813	A	G	0.213376	-0.152141	0.0929018	0.101495	0.9935553520945694	Mean number of eggs in utero	4.342193628794542	0	NA	NA	NA	NA	NA	NA	NA	NA	NA
I	I:3663718	3663718	T	C	0.0573248	0.0302354	0.173811	0.8619	0.06454311928839009	Mean number of eggs in utero	4.342193628794542	0	NA	NA	NA	NA	NA	NA	NA	NA	NA
I	I:3673319	3673319	C	A	0.121019	-0.109198	0.111447	0.327177	0.48521723410882167	Mean number of eggs in utero	4.342193628794542	0	NA	NA	NA	NA	NA	NA	NA	NA	NA
I	I:3682653	3682653	T	C	0.165605	-0.0727333	0.124441	0.558898	0.25266744449130174	Mean number of eggs in utero	4.342193628794542	0	NA	NA	NA	NA	NA	NA	NA	NA	NA
I	I:3683343	3683343	T	A	0.0955414	-0.12937	0.136828	0.344407	0.4629280301844722	Mean number of eggs in utero	4.342193628794542	0	NA	NA	NA	NA	NA	NA	NA	NA	NA
I	I:3686343	3686343	A	T	0.066879	0.176111	0.267597	0.510462	0.29203658228336943	Mean number of eggs in utero	4.342193628794542	0	NA	NA	NA	NA	NA	NA	NA	NA	NA
I	I:3688099	3688099	A	T	0.0955414	-0.0157897	0.163457	0.923045	0.03477712586976002	Mean number of eggs in utero	4.342193628794542	0	NA	NA	NA	NA	NA	NA	NA	NA	NA
I	I:3689987	3689987	A	G	0.0636943	-0.0569736	0.162484	0.725858	0.1391483322589793	Mean number of eggs in utero	4.342193628794542	0	NA	NA	NA	NA	NA	NA	NA	NA	NA
I	I:3690226	3690226	T	C	0.089172	-0.0515504	0.18176	0.776704	0.10974445823743878	Mean number of eggs in utero	4.342193628794542	0	NA	NA	NA	NA	NA	NA	NA	NA	NA
I	I:3690312	3690312	A	T	0.0605096	-0.0521852	0.16205	0.747429	0.12643005567605206	Mean number of eggs in utero	4.342193628794542	0	NA	NA	NA	NA	NA	NA	NA	NA	NA
I	I:3698290	3698290	T	A	0.0573248	0.0302354	0.173811	0.8619	0.06454311928839009	Mean number of eggs in utero	4.342193628794542	0	NA	NA	NA	NA	NA	NA	NA	NA	NA
I	I:3701578	3701578	T	G	0.121019	-0.104286	0.129011	0.418889	0.377901044036072	Mean number of eggs in utero	4.342193628794542	0	NA	NA	NA	NA	NA	NA	NA	NA	NA
I	I:3707300	3707300	C	A	0.0509554	-0.0816012	0.166427	0.623912	0.20487666129436097	Mean number of eggs in utero	4.342193628794542	0	NA	NA	NA	NA	NA	NA	NA	NA	NA
I	I:3718046	3718046	A	G	0.0764331	-0.0123754	0.220275	0.955197	0.01990705020705508	Mean number of eggs in utero	4.342193628794542	0	NA	NA	NA	NA	NA	NA	NA	NA	NA
I	I:3719584	3719584	T	C	0.089172	-0.132924	0.141855	0.348737	0.4575019727749604	Mean number of eggs in utero	4.342193628794542	0	NA	NA	NA	NA	NA	NA	NA	NA	NA
I	I:3720914	3720914	C	G	0.0955414	-0.017555	0.12465	0.888001	0.051586545151311836	Mean number of eggs in utero	4.342193628794542	0	NA	NA	NA	NA	NA	NA	NA	NA	NA
I	I:3728777	3728777	C	T	0.0605096	0.142249	0.322132	0.65879	0.1812530017575662	Mean number of eggs in utero	4.342193628794542	0	NA	NA	NA	NA	NA	NA	NA	NA	NA
I	I:3732680	3732680	G	A	0.0573248	-0.0943856	0.192376	0.623687	0.2050333081969116	Mean number of eggs in utero	4.342193628794542	0	NA	NA	NA	NA	NA	NA	NA	NA	NA
I	I:3733769	3733769	G	C	0.289809	-0.0909839	0.0891709	0.307571	0.5120546153390992	Mean number of eggs in utero	4.342193628794542	0	NA	NA	NA	NA	NA	NA	NA	NA	NA
I	I:3742277	3742277	G	A	0.0764331	-0.0123754	0.220275	0.955197	0.01990705020705508	Mean number of eggs in utero	4.342193628794542	0	NA	NA	NA	NA	NA	NA	NA	NA	NA
I	I:3754084	3754084	A	G	0.0955414	-0.017555	0.12465	0.888001	0.051586545151311836	Mean number of eggs in utero	4.342193628794542	0	NA	NA	NA	NA	NA	NA	NA	NA	NA
I	I:3756357	3756357	C	T	0.0541401	0.0543097	0.128639	0.672888	0.17205721665241916	Mean number of eggs in utero	4.342193628794542	0	NA	NA	NA	NA	NA	NA	NA	NA	NA
I	I:3757739	3757739	C	A	0.347134	-0.0645401	0.0788115	0.412833	0.3842255944596211	Mean number of eggs in utero	4.342193628794542	0	NA	NA	NA	NA	NA	NA	NA	NA	NA
I	I:3785710	3785710	C	A	0.0955414	-0.139597	0.135204	0.301841	0.5202217689859553	Mean number of eggs in utero	4.342193628794542	0	NA	NA	NA	NA	NA	NA	NA	NA	NA
I	I:3787928	3787928	A	T	0.289809	-0.0909839	0.0891709	0.307571	0.5120546153390992	Mean number of eggs in utero	4.342193628794542	0	NA	NA	NA	NA	NA	NA	NA	NA	NA
I	I:3805936	3805936	T	G	0.121019	-0.133713	0.114578	0.243207	0.6140239293268385	Mean number of eggs in utero	4.342193628794542	0	NA	NA	NA	NA	NA	NA	NA	NA	NA
I	I:3807464	3807464	C	T	0.0573248	0.0302354	0.173811	0.8619	0.06454311928839009	Mean number of eggs in utero	4.342193628794542	0	NA	NA	NA	NA	NA	NA	NA	NA	NA
I	I:3811257	3811257	C	T	0.0955414	-0.017555	0.12465	0.888001	0.051586545151311836	Mean number of eggs in utero	4.342193628794542	0	NA	NA	NA	NA	NA	NA	NA	NA	NA
I	I:3823257	3823257	T	C	0.0796178	-0.0130879	0.210497	0.950422	0.022083519366228335	Mean number of eggs in utero	4.342193628794542	0	NA	NA	NA	NA	NA	NA	NA	NA	NA
I	I:3840305	3840305	A	G	0.216561	-0.0959329	0.0910658	0.292137	0.5344134348847136	Mean number of eggs in utero	4.342193628794542	0	NA	NA	NA	NA	NA	NA	NA	NA	NA
I	I:3843927	3843927	G	C	0.289809	-0.0909839	0.0891709	0.307571	0.5120546153390992	Mean number of eggs in utero	4.342193628794542	0	NA	NA	NA	NA	NA	NA	NA	NA	NA
I	I:3852514	3852514	C	T	0.0923567	-0.0157244	0.126012	0.900693	0.04542321249015702	Mean number of eggs in utero	4.342193628794542	0	NA	NA	NA	NA	NA	NA	NA	NA	NA
I	I:3853648	3853648	T	C	0.0796178	-0.0130879	0.210497	0.950422	0.022083519366228335	Mean number of eggs in utero	4.342193628794542	0	NA	NA	NA	NA	NA	NA	NA	NA	NA
I	I:3856435	3856435	C	T	0.0636943	0.155369	0.353533	0.660318	0.18024686387476324	Mean number of eggs in utero	4.342193628794542	0	NA	NA	NA	NA	NA	NA	NA	NA	NA
I	I:3864155	3864155	C	T	0.156051	-0.0906762	0.129549	0.483967	0.3151842503525014	Mean number of eggs in utero	4.342193628794542	0	NA	NA	NA	NA	NA	NA	NA	NA	NA
I	I:3865139	3865139	T	C	0.121019	0.056229	0.158298	0.722433	0.14120242411402914	Mean number of eggs in utero	4.342193628794542	0	NA	NA	NA	NA	NA	NA	NA	NA	NA
I	I:3887806	3887806	G	T	0.0509554	0.0674897	0.191456	0.724457	0.1399873868897373	Mean number of eggs in utero	4.342193628794542	0	NA	NA	NA	NA	NA	NA	NA	NA	NA
I	I:3888650	3888650	A	G	0.0955414	-0.128802	0.1352	0.340754	0.46755903742217664	Mean number of eggs in utero	4.342193628794542	0	NA	NA	NA	NA	NA	NA	NA	NA	NA
I	I:3896968	3896968	G	T	0.0955414	-0.0387132	0.122966	0.752893	0.12326674068043485	Mean number of eggs in utero	4.342193628794542	0	NA	NA	NA	NA	NA	NA	NA	NA	NA
I	I:3904748	3904748	A	T	0.0541401	0.0543097	0.128639	0.672888	0.17205721665241916	Mean number of eggs in utero	4.342193628794542	0	NA	NA	NA	NA	NA	NA	NA	NA	NA
I	I:3924601	3924601	G	A	0.207006	-0.0895636	0.0927229	0.334081	0.4761482230442867	Mean number of eggs in utero	4.342193628794542	0	NA	NA	NA	NA	NA	NA	NA	NA	NA
I	I:3930796	3930796	G	A	0.0573248	0.0302354	0.173811	0.8619	0.06454311928839009	Mean number of eggs in utero	4.342193628794542	0	NA	NA	NA	NA	NA	NA	NA	NA	NA
I	I:3931052	3931052	C	T	0.0828025	-0.0395033	0.204586	0.846889	0.07217350802410885	Mean number of eggs in utero	4.342193628794542	0	NA	NA	NA	NA	NA	NA	NA	NA	NA
I	I:3939348	3939348	T	A	0.0509554	-0.0111805	0.215653	0.958652	0.018339017342398636	Mean number of eggs in utero	4.342193628794542	0	NA	NA	NA	NA	NA	NA	NA	NA	NA
I	I:3946535	3946535	A	T	0.286624	-0.0906402	0.0895501	0.311455	0.5066046927077104	Mean number of eggs in utero	4.342193628794542	0	NA	NA	NA	NA	NA	NA	NA	NA	NA
I	I:3958511	3958511	G	A	0.0923567	-0.132987	0.137951	0.335037	0.47490722875865043	Mean number of eggs in utero	4.342193628794542	0	NA	NA	NA	NA	NA	NA	NA	NA	NA
I	I:3979900	3979900	C	T	0.0509554	0.0272874	0.15976	0.864379	0.0632957928009504	Mean number of eggs in utero	4.342193628794542	0	NA	NA	NA	NA	NA	NA	NA	NA	NA
I	I:3988704	3988704	T	C	0.340764	-0.0508761	0.0796426	0.522949	0.2815406631376411	Mean number of eggs in utero	4.342193628794542	0	NA	NA	NA	NA	NA	NA	NA	NA	NA
I	I:3988793	3988793	A	T	0.0923567	-0.0157244	0.126012	0.900693	0.04542321249015702	Mean number of eggs in utero	4.342193628794542	0	NA	NA	NA	NA	NA	NA	NA	NA	NA
I	I:3997801	3997801	A	G	0.0541401	0.0543097	0.128639	0.672888	0.17205721665241916	Mean number of eggs in utero	4.342193628794542	0	NA	NA	NA	NA	NA	NA	NA	NA	NA
I	I:4009346	4009346	G	A	0.0573248	0.0302354	0.173811	0.8619	0.06454311928839009	Mean number of eggs in utero	4.342193628794542	0	NA	NA	NA	NA	NA	NA	NA	NA	NA
I	I:4012008	4012008	A	T	0.0605096	0.267212	0.169558	0.115042	0.9391435767055113	Mean number of eggs in utero	4.342193628794542	0	NA	NA	NA	NA	NA	NA	NA	NA	NA
I	I:4018396	4018396	G	A	0.0796178	0.00129087	0.211537	0.995131	0.0021197445484772977	Mean number of eggs in utero	4.342193628794542	0	NA	NA	NA	NA	NA	NA	NA	NA	NA
I	I:4028742	4028742	T	G	0.0955414	-0.0109742	0.12296	0.928883	0.03203898531137351	Mean number of eggs in utero	4.342193628794542	0	NA	NA	NA	NA	NA	NA	NA	NA	NA
I	I:4034481	4034481	G	A	0.289809	-0.103455	0.0887495	0.243737	0.6130785386194789	Mean number of eggs in utero	4.342193628794542	0	NA	NA	NA	NA	NA	NA	NA	NA	NA
I	I:4035088	4035088	C	T	0.10828	-0.141641	0.121258	0.242766	0.6148121373922716	Mean number of eggs in utero	4.342193628794542	0	NA	NA	NA	NA	NA	NA	NA	NA	NA
I	I:4044040	4044040	T	A	0.0636943	0.155369	0.353533	0.660318	0.18024686387476324	Mean number of eggs in utero	4.342193628794542	0	NA	NA	NA	NA	NA	NA	NA	NA	NA
I	I:4046395	4046395	G	T	0.0605096	0.0974905	0.183192	0.594604	0.22577217355004425	Mean number of eggs in utero	4.342193628794542	0	NA	NA	NA	NA	NA	NA	NA	NA	NA
I	I:4049669	4049669	A	G	0.0605096	0.0420153	0.125617	0.738024	0.13192951500881672	Mean number of eggs in utero	4.342193628794542	0	NA	NA	NA	NA	NA	NA	NA	NA	NA
I	I:4068806	4068806	T	C	0.226115	-0.115121	0.0894813	0.198254	0.7027780415367004	Mean number of eggs in utero	4.342193628794542	0	NA	NA	NA	NA	NA	NA	NA	NA	NA
I	I:4072377	4072377	A	T	0.0923567	-0.132987	0.137951	0.335037	0.47490722875865043	Mean number of eggs in utero	4.342193628794542	0	NA	NA	NA	NA	NA	NA	NA	NA	NA
I	I:4074724	4074724	G	A	0.289809	-0.103455	0.0887495	0.243737	0.6130785386194789	Mean number of eggs in utero	4.342193628794542	0	NA	NA	NA	NA	NA	NA	NA	NA	NA
I	I:4083512	4083512	C	T	0.0987261	-0.0369084	0.120127	0.758658	0.11995395820973313	Mean number of eggs in utero	4.342193628794542	0	NA	NA	NA	NA	NA	NA	NA	NA	NA
I	I:4088697	4088697	G	T	0.0605096	0.0974905	0.183192	0.594604	0.22577217355004425	Mean number of eggs in utero	4.342193628794542	0	NA	NA	NA	NA	NA	NA	NA	NA	NA
I	I:4112471	4112471	T	C	0.226115	-0.115121	0.0894813	0.198254	0.7027780415367004	Mean number of eggs in utero	4.342193628794542	0	NA	NA	NA	NA	NA	NA	NA	NA	NA
I	I:4116456	4116456	T	A	0.117834	-0.1374	0.114805	0.231383	0.6356685523739196	Mean number of eggs in utero	4.342193628794542	0	NA	NA	NA	NA	NA	NA	NA	NA	NA
I	I:4117516	4117516	G	A	0.292994	-0.0902236	0.0883929	0.307391	0.5123088522154429	Mean number of eggs in utero	4.342193628794542	0	NA	NA	NA	NA	NA	NA	NA	NA	NA
I	I:4126926	4126926	G	A	0.175159	-0.0946565	0.100222	0.344929	0.462270290670256	Mean number of eggs in utero	4.342193628794542	0	NA	NA	NA	NA	NA	NA	NA	NA	NA
I	I:4136651	4136651	G	C	0.0700637	0.197829	0.266282	0.457524	0.3395861195337443	Mean number of eggs in utero	4.342193628794542	0	NA	NA	NA	NA	NA	NA	NA	NA	NA
I	I:4144586	4144586	A	G	0.121019	-0.0724193	0.110973	0.514023	0.28901744802883667	Mean number of eggs in utero	4.342193628794542	0	NA	NA	NA	NA	NA	NA	NA	NA	NA
I	I:4148135	4148135	A	C	0.0605096	0.0420153	0.125617	0.738024	0.13192951500881672	Mean number of eggs in utero	4.342193628794542	0	NA	NA	NA	NA	NA	NA	NA	NA	NA
I	I:4151473	4151473	T	C	0.101911	-0.0976636	0.126181	0.438932	0.3576027560955186	Mean number of eggs in utero	4.342193628794542	0	NA	NA	NA	NA	NA	NA	NA	NA	NA
I	I:4152549	4152549	T	C	0.16879	-0.0685776	0.117927	0.560885	0.25112617436797796	Mean number of eggs in utero	4.342193628794542	0	NA	NA	NA	NA	NA	NA	NA	NA	NA
I	I:4163488	4163488	A	G	0.289809	-0.0862949	0.0893392	0.334082	0.476146923078614	Mean number of eggs in utero	4.342193628794542	0	NA	NA	NA	NA	NA	NA	NA	NA	NA
I	I:4175984	4175984	C	T	0.0636943	0.155369	0.353533	0.660318	0.18024686387476324	Mean number of eggs in utero	4.342193628794542	0	NA	NA	NA	NA	NA	NA	NA	NA	NA
I	I:4178997	4178997	G	T	0.0828025	-0.0142677	0.139338	0.918442	0.0369482643720914	Mean number of eggs in utero	4.342193628794542	0	NA	NA	NA	NA	NA	NA	NA	NA	NA
I	I:4187375	4187375	C	T	0.0987261	-0.130155	0.129833	0.316113	0.5001576436347255	Mean number of eggs in utero	4.342193628794542	0	NA	NA	NA	NA	NA	NA	NA	NA	NA
I	I:4202729	4202729	C	T	0.0636943	-0.0480104	0.156365	0.758813	0.11986523737759984	Mean number of eggs in utero	4.342193628794542	0	NA	NA	NA	NA	NA	NA	NA	NA	NA
I	I:4209517	4209517	T	A	0.089172	-0.0731083	0.130867	0.576405	0.2392722605731918	Mean number of eggs in utero	4.342193628794542	0	NA	NA	NA	NA	NA	NA	NA	NA	NA
I	I:4210159	4210159	A	T	0.140127	-0.0916007	0.102836	0.373067	0.4282131651959628	Mean number of eggs in utero	4.342193628794542	0	NA	NA	NA	NA	NA	NA	NA	NA	NA
I	I:4225803	4225803	C	T	0.200637	-0.0215094	0.106234	0.839547	0.07595498592344861	Mean number of eggs in utero	4.342193628794542	0	NA	NA	NA	NA	NA	NA	NA	NA	NA
I	I:4230336	4230336	A	T	0.289809	-0.0697229	0.0905072	0.441088	0.35547475724012195	Mean number of eggs in utero	4.342193628794542	0	NA	NA	NA	NA	NA	NA	NA	NA	NA
I	I:4231223	4231223	A	T	0.089172	-0.132924	0.141855	0.348737	0.4575019727749604	Mean number of eggs in utero	4.342193628794542	0	NA	NA	NA	NA	NA	NA	NA	NA	NA
I	I:4233867	4233867	A	T	0.22293	-0.110311	0.0896022	0.218278	0.6609900341492135	Mean number of eggs in utero	4.342193628794542	0	NA	NA	NA	NA	NA	NA	NA	NA	NA
I	I:4236976	4236976	C	T	0.0636943	-0.0480104	0.156365	0.758813	0.11986523737759984	Mean number of eggs in utero	4.342193628794542	0	NA	NA	NA	NA	NA	NA	NA	NA	NA
I	I:4242983	4242983	G	A	0.156051	-0.0286421	0.101479	0.777755	0.10915718823542157	Mean number of eggs in utero	4.342193628794542	0	NA	NA	NA	NA	NA	NA	NA	NA	NA
I	I:4251001	4251001	T	C	0.117834	-0.0116	0.110519	0.916408	0.03791112818987484	Mean number of eggs in utero	4.342193628794542	0	NA	NA	NA	NA	NA	NA	NA	NA	NA
I	I:4262424	4262424	C	T	0.0541401	0.176612	0.366833	0.630196	0.200524357720954	Mean number of eggs in utero	4.342193628794542	0	NA	NA	NA	NA	NA	NA	NA	NA	NA
I	I:4266657	4266657	C	T	0.0923567	-0.0427898	0.114089	0.70762	0.1501999007949756	Mean number of eggs in utero	4.342193628794542	0	NA	NA	NA	NA	NA	NA	NA	NA	NA
I	I:4278001	4278001	G	T	0.089172	-0.132924	0.141855	0.348737	0.4575019727749604	Mean number of eggs in utero	4.342193628794542	0	NA	NA	NA	NA	NA	NA	NA	NA	NA
I	I:4297692	4297692	G	T	0.251592	-0.057287	0.0934478	0.539852	0.26772528534937756	Mean number of eggs in utero	4.342193628794542	0	NA	NA	NA	NA	NA	NA	NA	NA	NA
I	I:4301194	4301194	A	T	0.159236	-0.0532065	0.127503	0.676462	0.16975659471134552	Mean number of eggs in utero	4.342193628794542	0	NA	NA	NA	NA	NA	NA	NA	NA	NA
I	I:4301785	4301785	G	T	0.0700637	0.270651	0.284971	0.342238	0.4656717707327558	Mean number of eggs in utero	4.342193628794542	0	NA	NA	NA	NA	NA	NA	NA	NA	NA
I	I:4305556	4305556	G	A	0.490446	-0.0261782	0.0739829	0.723457	0.1405872768707106	Mean number of eggs in utero	4.342193628794542	0	NA	NA	NA	NA	NA	NA	NA	NA	NA
I	I:4316016	4316016	G	A	0.0509554	0.00633482	0.152862	0.966944	0.014598677101307043	Mean number of eggs in utero	4.342193628794542	0	NA	NA	NA	NA	NA	NA	NA	NA	NA
I	I:4319318	4319318	T	G	0.111465	-0.00421553	0.136674	0.975394	0.010819920238102174	Mean number of eggs in utero	4.342193628794542	0	NA	NA	NA	NA	NA	NA	NA	NA	NA
I	I:4332127	4332127	C	T	0.16242	5.73583e-4	0.112363	0.995927	0.0017724935633099566	Mean number of eggs in utero	4.342193628794542	0	NA	NA	NA	NA	NA	NA	NA	NA	NA
I	I:4357553	4357553	G	T	0.0859873	-0.0320723	0.109889	0.770392	0.11328823571464156	Mean number of eggs in utero	4.342193628794542	0	NA	NA	NA	NA	NA	NA	NA	NA	NA
I	I:4357952	4357952	A	C	0.216561	-0.0495288	0.0912346	0.587218	0.2312006404542796	Mean number of eggs in utero	4.342193628794542	0	NA	NA	NA	NA	NA	NA	NA	NA	NA
I	I:4365020	4365020	G	A	0.0573248	-0.0278002	0.13444	0.836178	0.07770126300455989	Mean number of eggs in utero	4.342193628794542	0	NA	NA	NA	NA	NA	NA	NA	NA	NA
I	I:4365643	4365643	T	A	0.0700637	0.0370012	0.118306	0.754465	0.12236090255431047	Mean number of eggs in utero	4.342193628794542	0	NA	NA	NA	NA	NA	NA	NA	NA	NA
I	I:4370151	4370151	A	T	0.089172	0.181134	0.14328	0.206158	0.6857998076564968	Mean number of eggs in utero	4.342193628794542	0	NA	NA	NA	NA	NA	NA	NA	NA	NA
I	I:4379707	4379707	A	T	0.0700637	0.270651	0.284971	0.342238	0.4656717707327558	Mean number of eggs in utero	4.342193628794542	0	NA	NA	NA	NA	NA	NA	NA	NA	NA
I	I:4389433	4389433	C	G	0.0509554	0.00633482	0.152862	0.966944	0.014598677101307043	Mean number of eggs in utero	4.342193628794542	0	NA	NA	NA	NA	NA	NA	NA	NA	NA
I	I:4402437	4402437	T	G	0.159236	0.0115777	0.1142	0.919248	0.03656730634885656	Mean number of eggs in utero	4.342193628794542	0	NA	NA	NA	NA	NA	NA	NA	NA	NA
I	I:4432027	4432027	G	A	0.11465	0.0180928	0.133224	0.891974	0.04964780461613833	Mean number of eggs in utero	4.342193628794542	0	NA	NA	NA	NA	NA	NA	NA	NA	NA
I	I:4434616	4434616	C	T	0.117834	0.100858	0.150612	0.503078	0.2983646743011874	Mean number of eggs in utero	4.342193628794542	0	NA	NA	NA	NA	NA	NA	NA	NA	NA
I	I:4435395	4435395	T	C	0.0573248	0.284899	0.245096	0.245074	0.6107027607816901	Mean number of eggs in utero	4.342193628794542	0	NA	NA	NA	NA	NA	NA	NA	NA	NA
I	I:4443624	4443624	C	A	0.089172	0.164293	0.1689	0.330691	0.48057762457079983	Mean number of eggs in utero	4.342193628794542	0	NA	NA	NA	NA	NA	NA	NA	NA	NA
I	I:4448977	4448977	G	T	0.0700637	0.112985	0.14052	0.421368	0.3753384491529646	Mean number of eggs in utero	4.342193628794542	0	NA	NA	NA	NA	NA	NA	NA	NA	NA
I	I:4449247	4449247	A	G	0.159236	0.0115777	0.1142	0.919248	0.03656730634885656	Mean number of eggs in utero	4.342193628794542	0	NA	NA	NA	NA	NA	NA	NA	NA	NA
I	I:4468885	4468885	G	C	0.0796178	0.110494	0.151859	0.466854	0.33081891581078293	Mean number of eggs in utero	4.342193628794542	0	NA	NA	NA	NA	NA	NA	NA	NA	NA
I	I:4489655	4489655	T	A	0.0859873	0.0281415	0.217731	0.897161	0.04712961365898629	Mean number of eggs in utero	4.342193628794542	0	NA	NA	NA	NA	NA	NA	NA	NA	NA
I	I:4492208	4492208	G	A	0.0636943	0.155369	0.353533	0.660318	0.18024686387476324	Mean number of eggs in utero	4.342193628794542	0	NA	NA	NA	NA	NA	NA	NA	NA	NA
I	I:4516782	4516782	C	T	0.0955414	-0.0206945	0.116504	0.85901400000000006	0.06599975808587036	Mean number of eggs in utero	4.342193628794542	0	NA	NA	NA	NA	NA	NA	NA	NA	NA
I	I:4517109	4517109	G	A	0.0732484	-0.0135329	0.12435	0.913338	0.03936847288204326	Mean number of eggs in utero	4.342193628794542	0	NA	NA	NA	NA	NA	NA	NA	NA	NA
I	I:4524005	4524005	T	A	0.187898	0.0171056	0.0993449	0.863293	0.06384178054569219	Mean number of eggs in utero	4.342193628794542	0	NA	NA	NA	NA	NA	NA	NA	NA	NA
I	I:4576986	4576986	A	G	0.156051	-0.025752	0.116117	0.824488	0.08381566090691936	Mean number of eggs in utero	4.342193628794542	0	NA	NA	NA	NA	NA	NA	NA	NA	NA
I	I:4593675	4593675	T	G	0.101911	-0.00368639	0.113186	0.974018	0.011433017219493932	Mean number of eggs in utero	4.342193628794542	0	NA	NA	NA	NA	NA	NA	NA	NA	NA
I	I:4595793	4595793	T	C	0.0955414	-0.0206945	0.116504	0.85901400000000006	0.06599975808587036	Mean number of eggs in utero	4.342193628794542	0	NA	NA	NA	NA	NA	NA	NA	NA	NA
I	I:4596268	4596268	C	T	0.0605096	-0.0847457	0.469001	0.856608	0.06721787397443497	Mean number of eggs in utero	4.342193628794542	0	NA	NA	NA	NA	NA	NA	NA	NA	NA
I	I:4609835	4609835	A	G	0.0764331	-0.0188512	0.122428	0.877627	0.05669002425440679	Mean number of eggs in utero	4.342193628794542	0	NA	NA	NA	NA	NA	NA	NA	NA	NA
I	I:4616780	4616780	A	G	0.127389	0.0210326	0.0996404	0.832821	0.07944833240586079	Mean number of eggs in utero	4.342193628794542	0	NA	NA	NA	NA	NA	NA	NA	NA	NA
I	I:4617437	4617437	C	T	0.0923567	-0.270293	0.139642	0.0529149	1.2764220202780305	Mean number of eggs in utero	4.342193628794542	0	NA	NA	NA	NA	NA	NA	NA	NA	NA
I	I:4622776	4622776	G	A	0.187898	0.0171056	0.0993449	0.863293	0.06384178054569219	Mean number of eggs in utero	4.342193628794542	0	NA	NA	NA	NA	NA	NA	NA	NA	NA
I	I:4653739	4653739	T	C	0.187898	-0.181245	0.102262	0.0763353	1.117274583277436	Mean number of eggs in utero	4.342193628794542	0	NA	NA	NA	NA	NA	NA	NA	NA	NA
I	I:4662963	4662963	T	C	0.124204	0.028387	0.100895	0.77844	0.10877485602214848	Mean number of eggs in utero	4.342193628794542	0	NA	NA	NA	NA	NA	NA	NA	NA	NA
I	I:4664661	4664661	C	A	0.184713	0.0243344	0.100625	0.80891	0.09209979566546453	Mean number of eggs in utero	4.342193628794542	0	NA	NA	NA	NA	NA	NA	NA	NA	NA
I	I:4668159	4668159	T	C	0.101911	-0.00368639	0.113186	0.974018	0.011433017219493932	Mean number of eggs in utero	4.342193628794542	0	NA	NA	NA	NA	NA	NA	NA	NA	NA
I	I:4670102	4670102	T	A	0.0605096	-0.0847457	0.469001	0.856608	0.06721787397443497	Mean number of eggs in utero	4.342193628794542	0	NA	NA	NA	NA	NA	NA	NA	NA	NA
I	I:4673538	4673538	T	C	0.089172	0.00879935	0.110327	0.936431	0.028524217672880107	Mean number of eggs in utero	4.342193628794542	0	NA	NA	NA	NA	NA	NA	NA	NA	NA
I	I:4696211	4696211	C	T	0.0509554	0.0469699	0.15904	0.767739	0.11478639731866025	Mean number of eggs in utero	4.342193628794542	0	NA	NA	NA	NA	NA	NA	NA	NA	NA
I	I:4696683	4696683	C	A	0.111465	0.0364397	0.157354	0.816866	0.08784917998356014	Mean number of eggs in utero	4.342193628794542	0	NA	NA	NA	NA	NA	NA	NA	NA	NA
I	I:4710525	4710525	T	G	0.5	-0.0757628	0.073918	0.305384	0.5151537206972119	Mean number of eggs in utero	4.342193628794542	0	NA	NA	NA	NA	NA	NA	NA	NA	NA
I	I:4711029	4711029	G	C	0.0923567	-0.0119977	0.118489	0.919347	0.03652053677344707	Mean number of eggs in utero	4.342193628794542	0	NA	NA	NA	NA	NA	NA	NA	NA	NA
I	I:4711316	4711316	T	C	0.152866	-0.017305	0.118142	0.883545	0.053771326458296166	Mean number of eggs in utero	4.342193628794542	0	NA	NA	NA	NA	NA	NA	NA	NA	NA
I	I:4727684	4727684	A	T	0.111465	-0.0132234	0.116078	0.909303	0.041291376072842376	Mean number of eggs in utero	4.342193628794542	0	NA	NA	NA	NA	NA	NA	NA	NA	NA
I	I:4739024	4739024	C	A	0.0796178	-0.0379576	0.241237	0.874972	0.058005844623471185	Mean number of eggs in utero	4.342193628794542	0	NA	NA	NA	NA	NA	NA	NA	NA	NA
I	I:4739487	4739487	T	C	0.127389	-0.229955	0.110072	0.0366954	1.4353883738903384	Mean number of eggs in utero	4.342193628794542	0	NA	NA	NA	NA	NA	NA	NA	NA	NA
I	I:4741347	4741347	C	T	0.101911	-0.00368639	0.113186	0.974018	0.011433017219493932	Mean number of eggs in utero	4.342193628794542	0	NA	NA	NA	NA	NA	NA	NA	NA	NA
I	I:4748710	4748710	A	T	0.0636943	0.136158	0.402626	0.735231	0.13357618980868635	Mean number of eggs in utero	4.342193628794542	0	NA	NA	NA	NA	NA	NA	NA	NA	NA
I	I:4754801	4754801	C	G	0.111465	0.0199149	0.154892	0.897696	0.04687070996392927	Mean number of eggs in utero	4.342193628794542	0	NA	NA	NA	NA	NA	NA	NA	NA	NA
I	I:4763260	4763260	A	G	0.0828025	0.00628269	0.141989	0.964707	0.015604570184821401	Mean number of eggs in utero	4.342193628794542	0	NA	NA	NA	NA	NA	NA	NA	NA	NA
I	I:4764655	4764655	T	G	0.0509554	-0.0437565	0.151608	0.772875	0.11189074049306828	Mean number of eggs in utero	4.342193628794542	0	NA	NA	NA	NA	NA	NA	NA	NA	NA
I	I:4780808	4780808	T	A	0.0636943	-0.0522167	0.140218	0.709597	0.14898822926173	Mean number of eggs in utero	4.342193628794542	0	NA	NA	NA	NA	NA	NA	NA	NA	NA
I	I:4795748	4795748	A	T	0.101911	-0.00368639	0.113186	0.974018	0.011433017219493932	Mean number of eggs in utero	4.342193628794542	0	NA	NA	NA	NA	NA	NA	NA	NA	NA
I	I:4812351	4812351	G	A	0.187898	0.0170631	0.100085	0.864628	0.06317070443896984	Mean number of eggs in utero	4.342193628794542	0	NA	NA	NA	NA	NA	NA	NA	NA	NA
I	I:4819453	4819453	T	A	0.117834	0.013529	0.102633	0.895127	0.048115342911672715	Mean number of eggs in utero	4.342193628794542	0	NA	NA	NA	NA	NA	NA	NA	NA	NA
I	I:4820355	4820355	T	C	0.0764331	0.0119454	0.116953	0.918647	0.03685133888926535	Mean number of eggs in utero	4.342193628794542	0	NA	NA	NA	NA	NA	NA	NA	NA	NA
I	I:4837797	4837797	T	C	0.0923567	-0.0330731	0.128143	0.796333	0.0989052867590574	Mean number of eggs in utero	4.342193628794542	0	NA	NA	NA	NA	NA	NA	NA	NA	NA
I	I:4837860	4837860	A	T	0.066879	0.0557616	0.31678	0.860273	0.06536370738526052	Mean number of eggs in utero	4.342193628794542	0	NA	NA	NA	NA	NA	NA	NA	NA	NA
I	I:4843830	4843830	T	C	0.0987261	0.173046	0.140291	0.217396	0.6627484510220757	Mean number of eggs in utero	4.342193628794542	0	NA	NA	NA	NA	NA	NA	NA	NA	NA
I	I:4847185	4847185	T	C	0.0573248	-0.0136421	0.135984	0.920089	0.03617016141594534	Mean number of eggs in utero	4.342193628794542	0	NA	NA	NA	NA	NA	NA	NA	NA	NA
I	I:4853605	4853605	C	T	0.127389	0.0529596	0.124553	0.670692	0.1734768738838545	Mean number of eggs in utero	4.342193628794542	0	NA	NA	NA	NA	NA	NA	NA	NA	NA
I	I:4867079	4867079	C	A	0.089172	-0.00182615	0.186758	0.992198	0.0034016527179336255	Mean number of eggs in utero	4.342193628794542	0	NA	NA	NA	NA	NA	NA	NA	NA	NA
I	I:4869153	4869153	G	T	0.184713	0.0185966	0.100531	0.853242	0.06892777497682777	Mean number of eggs in utero	4.342193628794542	0	NA	NA	NA	NA	NA	NA	NA	NA	NA
I	I:4872985	4872985	A	G	0.0636943	0.0647786	0.128293	0.61361	0.21210757130576652	Mean number of eggs in utero	4.342193628794542	0	NA	NA	NA	NA	NA	NA	NA	NA	NA
I	I:4878381	4878381	A	T	0.0605096	0.0454949	0.255054	0.85843	0.06629511326159306	Mean number of eggs in utero	4.342193628794542	0	NA	NA	NA	NA	NA	NA	NA	NA	NA
I	I:4884561	4884561	A	T	0.127389	0.0110324	0.0936156	0.906188	0.042781693170173316	Mean number of eggs in utero	4.342193628794542	0	NA	NA	NA	NA	NA	NA	NA	NA	NA
I	I:4886995	4886995	A	T	0.101911	-0.00368639	0.113186	0.974018	0.011433017219493932	Mean number of eggs in utero	4.342193628794542	0	NA	NA	NA	NA	NA	NA	NA	NA	NA
I	I:4888174	4888174	T	A	0.117834	0.0299961	0.0998552	0.763875	0.11697770327211704	Mean number of eggs in utero	4.342193628794542	0	NA	NA	NA	NA	NA	NA	NA	NA	NA
I	I:4891324	4891324	C	A	0.0573248	-0.0136421	0.135984	0.920089	0.03617016141594534	Mean number of eggs in utero	4.342193628794542	0	NA	NA	NA	NA	NA	NA	NA	NA	NA
I	I:4892050	4892050	G	A	0.0605096	-0.0847457	0.469001	0.856608	0.06721787397443497	Mean number of eggs in utero	4.342193628794542	0	NA	NA	NA	NA	NA	NA	NA	NA	NA
I	I:4894464	4894464	G	A	0.124204	0.056515	0.126165	0.654193	0.18429410722668665	Mean number of eggs in utero	4.342193628794542	0	NA	NA	NA	NA	NA	NA	NA	NA	NA
I	I:4902407	4902407	C	T	0.066879	0.0601438	0.125674	0.632246	0.19911390960462977	Mean number of eggs in utero	4.342193628794542	0	NA	NA	NA	NA	NA	NA	NA	NA	NA
I	I:4924110	4924110	T	C	0.191083	0.0331756	0.0981142	0.735263	0.1335572881016095	Mean number of eggs in utero	4.342193628794542	0	NA	NA	NA	NA	NA	NA	NA	NA	NA
I	I:4930428	4930428	A	G	0.111465	0.092669	0.125976	0.461967	0.33538904658624297	Mean number of eggs in utero	4.342193628794542	0	NA	NA	NA	NA	NA	NA	NA	NA	NA
I	I:4938480	4938480	G	A	0.0605096	-0.0847457	0.469001	0.856608	0.06721787397443497	Mean number of eggs in utero	4.342193628794542	0	NA	NA	NA	NA	NA	NA	NA	NA	NA
I	I:4943164	4943164	G	A	0.130573	0.0338887	0.124246	0.785041	0.10510766095057568	Mean number of eggs in utero	4.342193628794542	0	NA	NA	NA	NA	NA	NA	NA	NA	NA
I	I:4967455	4967455	G	A	0.0859873	-0.0464247	0.190627	0.80759	0.09280906735557418	Mean number of eggs in utero	4.342193628794542	0	NA	NA	NA	NA	NA	NA	NA	NA	NA
I	I:4975889	4975889	T	A	0.0541401	-0.00677289	0.138079	0.960879	0.01733129801393487	Mean number of eggs in utero	4.342193628794542	0	NA	NA	NA	NA	NA	NA	NA	NA	NA
I	I:4977432	4977432	G	A	0.105096	0.14048	0.130633	0.282206	0.5494337569204714	Mean number of eggs in utero	4.342193628794542	0	NA	NA	NA	NA	NA	NA	NA	NA	NA
I	I:4978135	4978135	G	A	0.105096	-0.00838684	0.111541	0.940063	0.02684304040505529	Mean number of eggs in utero	4.342193628794542	0	NA	NA	NA	NA	NA	NA	NA	NA	NA
I	I:4984654	4984654	A	G	0.184713	0.0185966	0.100531	0.853242	0.06892777497682777	Mean number of eggs in utero	4.342193628794542	0	NA	NA	NA	NA	NA	NA	NA	NA	NA
I	I:4989694	4989694	A	G	0.0605096	-0.0847457	0.469001	0.856608	0.06721787397443497	Mean number of eggs in utero	4.342193628794542	0	NA	NA	NA	NA	NA	NA	NA	NA	NA
I	I:5018389	5018389	T	C	0.0636943	0.0279852	0.130645	0.830385	0.0807205044812461	Mean number of eggs in utero	4.342193628794542	0	NA	NA	NA	NA	NA	NA	NA	NA	NA
I	I:5021713	5021713	C	T	0.130573	0.0338887	0.124246	0.785041	0.10510766095057568	Mean number of eggs in utero	4.342193628794542	0	NA	NA	NA	NA	NA	NA	NA	NA	NA
I	I:5037441	5037441	G	A	0.0987261	0.173046	0.140291	0.217396	0.6627484510220757	Mean number of eggs in utero	4.342193628794542	0	NA	NA	NA	NA	NA	NA	NA	NA	NA
I	I:5041272	5041272	G	A	0.0636943	-0.0802646	0.346241	0.81668	0.08794807989085765	Mean number of eggs in utero	4.342193628794542	0	NA	NA	NA	NA	NA	NA	NA	NA	NA
I	I:5050032	5050032	C	A	0.0541401	-0.00677289	0.138079	0.960879	0.01733129801393487	Mean number of eggs in utero	4.342193628794542	0	NA	NA	NA	NA	NA	NA	NA	NA	NA
I	I:5091132	5091132	A	T	0.187898	0.0209736	0.0990228	0.832258	0.0797420215372827	Mean number of eggs in utero	4.342193628794542	0	NA	NA	NA	NA	NA	NA	NA	NA	NA
I	I:5099539	5099539	A	C	0.0636943	-0.0802646	0.346241	0.81668	0.08794807989085765	Mean number of eggs in utero	4.342193628794542	0	NA	NA	NA	NA	NA	NA	NA	NA	NA
I	I:5111833	5111833	T	C	0.0541401	-0.00677289	0.138079	0.960879	0.01733129801393487	Mean number of eggs in utero	4.342193628794542	0	NA	NA	NA	NA	NA	NA	NA	NA	NA
I	I:5126839	5126839	T	C	0.130573	0.0338887	0.124246	0.785041	0.10510766095057568	Mean number of eggs in utero	4.342193628794542	0	NA	NA	NA	NA	NA	NA	NA	NA	NA
I	I:5128385	5128385	C	T	0.105096	0.0790249	0.144666	0.58489	0.23292580380669822	Mean number of eggs in utero	4.342193628794542	0	NA	NA	NA	NA	NA	NA	NA	NA	NA
I	I:5185774	5185774	G	A	0.0636943	-0.0802646	0.346241	0.81668	0.08794807989085765	Mean number of eggs in utero	4.342193628794542	0	NA	NA	NA	NA	NA	NA	NA	NA	NA
I	I:5197051	5197051	A	T	0.181529	0.0261407	0.101552	0.79686	0.09861797291784598	Mean number of eggs in utero	4.342193628794542	0	NA	NA	NA	NA	NA	NA	NA	NA	NA
I	I:5207100	5207100	A	T	0.0509554	-0.189992	0.200409	0.343119	0.46455523249267977	Mean number of eggs in utero	4.342193628794542	0	NA	NA	NA	NA	NA	NA	NA	NA	NA
I	I:5222149	5222149	A	G	0.0541401	-0.00677289	0.138079	0.960879	0.01733129801393487	Mean number of eggs in utero	4.342193628794542	0	NA	NA	NA	NA	NA	NA	NA	NA	NA
I	I:5227352	5227352	C	G	0.0636943	-0.0802646	0.346241	0.81668	0.08794807989085765	Mean number of eggs in utero	4.342193628794542	0	NA	NA	NA	NA	NA	NA	NA	NA	NA
I	I:5242480	5242480	T	C	0.105096	-0.00838684	0.111541	0.940063	0.02684304040505529	Mean number of eggs in utero	4.342193628794542	0	NA	NA	NA	NA	NA	NA	NA	NA	NA
I	I:5247988	5247988	C	T	0.0859873	-0.0269419	0.127345	0.832446	0.07964392918819853	Mean number of eggs in utero	4.342193628794542	0	NA	NA	NA	NA	NA	NA	NA	NA	NA
I	I:5252796	5252796	A	T	0.0509554	-0.00590516	0.141016	0.966598	0.014754107800347954	Mean number of eggs in utero	4.342193628794542	0	NA	NA	NA	NA	NA	NA	NA	NA	NA
I	I:5253043	5253043	A	G	0.181529	0.0261407	0.101552	0.79686	0.09861797291784598	Mean number of eggs in utero	4.342193628794542	0	NA	NA	NA	NA	NA	NA	NA	NA	NA
I	I:5265106	5265106	T	C	0.0636943	-0.0802646	0.346241	0.81668	0.08794807989085765	Mean number of eggs in utero	4.342193628794542	0	NA	NA	NA	NA	NA	NA	NA	NA	NA
I	I:5281242	5281242	A	T	0.0732484	0.0245999	0.146697	0.866826	0.06206807071725879	Mean number of eggs in utero	4.342193628794542	0	NA	NA	NA	NA	NA	NA	NA	NA	NA
I	I:5294573	5294573	G	A	0.149682	-0.0158317	0.119516	0.894616	0.04836333883766092	Mean number of eggs in utero	4.342193628794542	0	NA	NA	NA	NA	NA	NA	NA	NA	NA
I	I:5299367	5299367	A	C	0.210191	0.0504526	0.0949977	0.595354	0.22522472413660635	Mean number of eggs in utero	4.342193628794542	0	NA	NA	NA	NA	NA	NA	NA	NA	NA
I	I:5312169	5312169	C	T	0.089172	-0.0682319	0.187637	0.716129	0.14500873894644897	Mean number of eggs in utero	4.342193628794542	0	NA	NA	NA	NA	NA	NA	NA	NA	NA
I	I:5330184	5330184	A	T	0.117834	0.0901123	0.130888	0.491158	0.30877877775472407	Mean number of eggs in utero	4.342193628794542	0	NA	NA	NA	NA	NA	NA	NA	NA	NA
I	I:5338148	5338148	G	A	0.0636943	-0.0802646	0.346241	0.81668	0.08794807989085765	Mean number of eggs in utero	4.342193628794542	0	NA	NA	NA	NA	NA	NA	NA	NA	NA
I	I:5338684	5338684	T	C	0.0509554	-0.00590516	0.141016	0.966598	0.014754107800347954	Mean number of eggs in utero	4.342193628794542	0	NA	NA	NA	NA	NA	NA	NA	NA	NA
I	I:5356605	5356605	T	A	0.0732484	0.0310597	0.127215	0.807113	0.09306565754447446	Mean number of eggs in utero	4.342193628794542	0	NA	NA	NA	NA	NA	NA	NA	NA	NA
I	I:5368570	5368570	C	T	0.149682	-0.0158317	0.119516	0.894616	0.04836333883766092	Mean number of eggs in utero	4.342193628794542	0	NA	NA	NA	NA	NA	NA	NA	NA	NA
I	I:5384652	5384652	A	C	0.0636943	-0.0802646	0.346241	0.81668	0.08794807989085765	Mean number of eggs in utero	4.342193628794542	0	NA	NA	NA	NA	NA	NA	NA	NA	NA
I	I:5403369	5403369	A	G	0.149682	-0.0158317	0.119516	0.894616	0.04836333883766092	Mean number of eggs in utero	4.342193628794542	0	NA	NA	NA	NA	NA	NA	NA	NA	NA
I	I:5430067	5430067	C	A	0.0509554	0.142064	0.18323	0.438145	0.35838214000135127	Mean number of eggs in utero	4.342193628794542	0	NA	NA	NA	NA	NA	NA	NA	NA	NA
I	I:5434072	5434072	G	C	0.0987261	0.173046	0.140291	0.217396	0.6627484510220757	Mean number of eggs in utero	4.342193628794542	0	NA	NA	NA	NA	NA	NA	NA	NA	NA
I	I:5446165	5446165	T	A	0.0509554	-0.144302	0.225193	0.521655	0.28261662560194956	Mean number of eggs in utero	4.342193628794542	0	NA	NA	NA	NA	NA	NA	NA	NA	NA
I	I:5456184	5456184	C	T	0.0636943	-0.0802646	0.346241	0.81668	0.08794807989085765	Mean number of eggs in utero	4.342193628794542	0	NA	NA	NA	NA	NA	NA	NA	NA	NA
I	I:5471434	5471434	C	T	0.149682	-0.0158317	0.119516	0.894616	0.04836333883766092	Mean number of eggs in utero	4.342193628794542	0	NA	NA	NA	NA	NA	NA	NA	NA	NA
I	I:5496898	5496898	G	T	0.0700637	0.0550736	0.144543	0.703189	0.15292793155866732	Mean number of eggs in utero	4.342193628794542	0	NA	NA	NA	NA	NA	NA	NA	NA	NA
I	I:5505117	5505117	A	T	0.0636943	-0.105038	0.369875	0.776424	0.10990104862309959	Mean number of eggs in utero	4.342193628794542	0	NA	NA	NA	NA	NA	NA	NA	NA	NA
I	I:5514941	5514941	T	A	0.0987261	-0.0406105	0.175559	0.817065	0.08774339264942413	Mean number of eggs in utero	4.342193628794542	0	NA	NA	NA	NA	NA	NA	NA	NA	NA
I	I:5515462	5515462	A	G	0.0573248	-0.00782076	0.185223	0.966321	0.014878582309947899	Mean number of eggs in utero	4.342193628794542	0	NA	NA	NA	NA	NA	NA	NA	NA	NA
I	I:5544924	5544924	G	A	0.149682	-0.0158317	0.119516	0.894616	0.04836333883766092	Mean number of eggs in utero	4.342193628794542	0	NA	NA	NA	NA	NA	NA	NA	NA	NA
I	I:5556920	5556920	T	C	0.0859873	-0.0363239	0.200518	0.856249	0.0673999227050485	Mean number of eggs in utero	4.342193628794542	0	NA	NA	NA	NA	NA	NA	NA	NA	NA
I	I:5563713	5563713	G	T	0.0636943	-0.0802646	0.346241	0.81668	0.08794807989085765	Mean number of eggs in utero	4.342193628794542	0	NA	NA	NA	NA	NA	NA	NA	NA	NA
I	I:5606674	5606674	T	C	0.149682	-0.0158317	0.119516	0.894616	0.04836333883766092	Mean number of eggs in utero	4.342193628794542	0	NA	NA	NA	NA	NA	NA	NA	NA	NA
I	I:5618748	5618748	T	G	0.0636943	-0.0802646	0.346241	0.81668	0.08794807989085765	Mean number of eggs in utero	4.342193628794542	0	NA	NA	NA	NA	NA	NA	NA	NA	NA
I	I:5633507	5633507	C	T	0.0987261	-0.0406105	0.175559	0.817065	0.08774339264942413	Mean number of eggs in utero	4.342193628794542	0	NA	NA	NA	NA	NA	NA	NA	NA	NA
I	I:5636057	5636057	T	A	0.066879	-0.0239724	0.145036	0.868718	0.06112117973061213	Mean number of eggs in utero	4.342193628794542	0	NA	NA	NA	NA	NA	NA	NA	NA	NA
I	I:5677647	5677647	T	A	0.0796178	-0.0154414	0.133977	0.908244	0.04179746247212734	Mean number of eggs in utero	4.342193628794542	0	NA	NA	NA	NA	NA	NA	NA	NA	NA
I	I:5680492	5680492	G	A	0.149682	-0.0158317	0.119516	0.894616	0.04836333883766092	Mean number of eggs in utero	4.342193628794542	0	NA	NA	NA	NA	NA	NA	NA	NA	NA
I	I:5683303	5683303	T	C	0.0605096	-0.0383952	0.178828	0.829998	0.0809229541179144	Mean number of eggs in utero	4.342193628794542	0	NA	NA	NA	NA	NA	NA	NA	NA	NA
I	I:5720189	5720189	C	T	0.0828025	0.00423847	0.120914	0.972037	0.012317203602531843	Mean number of eggs in utero	4.342193628794542	0	NA	NA	NA	NA	NA	NA	NA	NA	NA
I	I:5754055	5754055	G	A	0.066879	-0.148	0.300206	0.622017	0.2061977456865108	Mean number of eggs in utero	4.342193628794542	0	NA	NA	NA	NA	NA	NA	NA	NA	NA
I	I:5761195	5761195	A	C	0.149682	-0.0158317	0.119516	0.894616	0.04836333883766092	Mean number of eggs in utero	4.342193628794542	0	NA	NA	NA	NA	NA	NA	NA	NA	NA
I	I:5772518	5772518	A	C	0.0955414	0.126139	0.136474	0.355346	0.44934856888823427	Mean number of eggs in utero	4.342193628794542	0	NA	NA	NA	NA	NA	NA	NA	NA	NA
I	I:5807192	5807192	T	A	0.0605096	-0.0847457	0.469001	0.856608	0.06721787397443497	Mean number of eggs in utero	4.342193628794542	0	NA	NA	NA	NA	NA	NA	NA	NA	NA
I	I:5828222	5828222	G	A	0.143312	-0.0329778	0.121958	0.78685	0.10410805084452245	Mean number of eggs in utero	4.342193628794542	0	NA	NA	NA	NA	NA	NA	NA	NA	NA
I	I:5829908	5829908	A	T	0.0796178	-0.0279187	0.124832	0.82303	0.08458433417169212	Mean number of eggs in utero	4.342193628794542	0	NA	NA	NA	NA	NA	NA	NA	NA	NA
I	I:5831981	5831981	T	A	0.0732484	0.0143422	0.232993	0.950916	0.021857845152713707	Mean number of eggs in utero	4.342193628794542	0	NA	NA	NA	NA	NA	NA	NA	NA	NA
I	I:5858632	5858632	T	G	0.105096	-0.00838684	0.111541	0.940063	0.02684304040505529	Mean number of eggs in utero	4.342193628794542	0	NA	NA	NA	NA	NA	NA	NA	NA	NA
I	I:5870555	5870555	G	A	0.0605096	-0.0847457	0.469001	0.856608	0.06721787397443497	Mean number of eggs in utero	4.342193628794542	0	NA	NA	NA	NA	NA	NA	NA	NA	NA
I	I:5890167	5890167	T	C	0.0700637	0.00594323	0.129612	0.963427	0.016181186766965467	Mean number of eggs in utero	4.342193628794542	0	NA	NA	NA	NA	NA	NA	NA	NA	NA
I	I:5925429	5925429	G	T	0.136943	-0.0493918	0.123606	0.689457	0.16149281468763788	Mean number of eggs in utero	4.342193628794542	0	NA	NA	NA	NA	NA	NA	NA	NA	NA
I	I:5938644	5938644	A	G	0.0605096	-0.0847457	0.469001	0.856608	0.06721787397443497	Mean number of eggs in utero	4.342193628794542	0	NA	NA	NA	NA	NA	NA	NA	NA	NA
I	I:5941237	5941237	T	C	0.0541401	0.158528	0.186666	0.395738	0.40259224541771504	Mean number of eggs in utero	4.342193628794542	0	NA	NA	NA	NA	NA	NA	NA	NA	NA
I	I:5951134	5951134	A	G	0.089172	0.127549	0.15249	0.402904	0.3947984209479233	Mean number of eggs in utero	4.342193628794542	0	NA	NA	NA	NA	NA	NA	NA	NA	NA
I	I:5961170	5961170	T	A	0.0955414	-0.137238	0.17683	0.437689	0.35883436793870505	Mean number of eggs in utero	4.342193628794542	0	NA	NA	NA	NA	NA	NA	NA	NA	NA
I	I:5984578	5984578	G	A	0.0636943	-0.0611503	0.379051	0.871838	0.0595642057121724	Mean number of eggs in utero	4.342193628794542	0	NA	NA	NA	NA	NA	NA	NA	NA	NA
I	I:6001199	6001199	G	A	0.149682	-0.0404174	0.12139	0.739169	0.13125625527719495	Mean number of eggs in utero	4.342193628794542	0	NA	NA	NA	NA	NA	NA	NA	NA	NA
I	I:6014369	6014369	A	T	0.0541401	0.158528	0.186666	0.395738	0.40259224541771504	Mean number of eggs in utero	4.342193628794542	0	NA	NA	NA	NA	NA	NA	NA	NA	NA
I	I:6034041	6034041	T	A	0.0859873	-0.0539758	0.122741	0.660116	0.18037974061987702	Mean number of eggs in utero	4.342193628794542	0	NA	NA	NA	NA	NA	NA	NA	NA	NA
I	I:6075130	6075130	A	G	0.0636943	-0.0611503	0.379051	0.871838	0.0595642057121724	Mean number of eggs in utero	4.342193628794542	0	NA	NA	NA	NA	NA	NA	NA	NA	NA
I	I:6075727	6075727	G	C	0.0509554	0.00867256	0.143538	0.951821	0.021444717604596833	Mean number of eggs in utero	4.342193628794542	0	NA	NA	NA	NA	NA	NA	NA	NA	NA
I	I:6109456	6109456	T	C	0.0764331	-0.0731899	0.134885	0.587397	0.23106827587037349	Mean number of eggs in utero	4.342193628794542	0	NA	NA	NA	NA	NA	NA	NA	NA	NA
I	I:6127137	6127137	T	C	0.0636943	-0.0612712	0.371668	0.869058	0.06095123823558488	Mean number of eggs in utero	4.342193628794542	0	NA	NA	NA	NA	NA	NA	NA	NA	NA
I	I:6132995	6132995	G	A	0.140127	-0.0564161	0.133135	0.671748	0.17279361792085546	Mean number of eggs in utero	4.342193628794542	0	NA	NA	NA	NA	NA	NA	NA	NA	NA
I	I:6157499	6157499	T	C	0.0509554	-0.0265992	0.156189	0.864773	0.06309787841420918	Mean number of eggs in utero	4.342193628794542	0	NA	NA	NA	NA	NA	NA	NA	NA	NA
I	I:6169220	6169220	C	G	0.0605096	-0.0847457	0.469001	0.856608	0.06721787397443497	Mean number of eggs in utero	4.342193628794542	0	NA	NA	NA	NA	NA	NA	NA	NA	NA
I	I:6178398	6178398	A	T	0.0764331	-0.0731899	0.134885	0.587397	0.23106827587037349	Mean number of eggs in utero	4.342193628794542	0	NA	NA	NA	NA	NA	NA	NA	NA	NA
I	I:6196749	6196749	C	A	0.0509554	-0.181016	0.208163	0.384526	0.4150742897383001	Mean number of eggs in utero	4.342193628794542	0	NA	NA	NA	NA	NA	NA	NA	NA	NA
I	I:6198042	6198042	G	T	0.140127	-0.0564161	0.133135	0.671748	0.17279361792085546	Mean number of eggs in utero	4.342193628794542	0	NA	NA	NA	NA	NA	NA	NA	NA	NA
I	I:6204955	6204955	G	A	0.0605096	-0.0847457	0.469001	0.856608	0.06721787397443497	Mean number of eggs in utero	4.342193628794542	0	NA	NA	NA	NA	NA	NA	NA	NA	NA
I	I:6213519	6213519	T	C	0.0541401	0.158528	0.186666	0.395738	0.40259224541771504	Mean number of eggs in utero	4.342193628794542	0	NA	NA	NA	NA	NA	NA	NA	NA	NA
I	I:6251847	6251847	A	T	0.140127	-0.0564161	0.133135	0.671748	0.17279361792085546	Mean number of eggs in utero	4.342193628794542	0	NA	NA	NA	NA	NA	NA	NA	NA	NA
I	I:6253179	6253179	T	C	0.0605096	-0.0847457	0.469001	0.856608	0.06721787397443497	Mean number of eggs in utero	4.342193628794542	0	NA	NA	NA	NA	NA	NA	NA	NA	NA
I	I:6280082	6280082	A	T	0.0764331	-0.00838717	0.193911	0.9655	0.015247721884586476	Mean number of eggs in utero	4.342193628794542	0	NA	NA	NA	NA	NA	NA	NA	NA	NA
I	I:6309428	6309428	T	A	0.140127	-0.0564161	0.133135	0.671748	0.17279361792085546	Mean number of eggs in utero	4.342193628794542	0	NA	NA	NA	NA	NA	NA	NA	NA	NA
I	I:6333393	6333393	T	A	0.0636943	-0.323045	0.348897	0.354497	0.4503874357671167	Mean number of eggs in utero	4.342193628794542	0	NA	NA	NA	NA	NA	NA	NA	NA	NA
I	I:6344194	6344194	A	T	0.11465	-0.0969332	0.118247	0.412359	0.3847245222414289	Mean number of eggs in utero	4.342193628794542	0	NA	NA	NA	NA	NA	NA	NA	NA	NA
I	I:6362298	6362298	A	T	0.0541401	-0.00702704	0.140723	0.960174	0.01765005821835093	Mean number of eggs in utero	4.342193628794542	0	NA	NA	NA	NA	NA	NA	NA	NA	NA
I	I:6389800	6389800	A	G	0.0828025	0.0758853	0.131283	0.563245	0.2493026548762979	Mean number of eggs in utero	4.342193628794542	0	NA	NA	NA	NA	NA	NA	NA	NA	NA
I	I:6390324	6390324	A	G	0.066879	-0.0522912	0.328735	0.873615	0.058679917723928346	Mean number of eggs in utero	4.342193628794542	0	NA	NA	NA	NA	NA	NA	NA	NA	NA
I	I:6396141	6396141	T	C	0.146497	-0.0416723	0.128285	0.745302	0.12766771334938387	Mean number of eggs in utero	4.342193628794542	0	NA	NA	NA	NA	NA	NA	NA	NA	NA
I	I:6406238	6406238	A	T	0.414013	0.0264531	0.0760852	0.728083	0.1378191091659341	Mean number of eggs in utero	4.342193628794542	0	NA	NA	NA	NA	NA	NA	NA	NA	NA
I	I:6425151	6425151	A	G	0.105096	0.0716896	0.12427	0.564017	0.24870780577742743	Mean number of eggs in utero	4.342193628794542	0	NA	NA	NA	NA	NA	NA	NA	NA	NA
I	I:6437366	6437366	C	T	0.0509554	-0.181016	0.208163	0.384526	0.4150742897383001	Mean number of eggs in utero	4.342193628794542	0	NA	NA	NA	NA	NA	NA	NA	NA	NA
I	I:6437525	6437525	T	C	0.0636943	-0.0612712	0.371668	0.869058	0.06095123823558488	Mean number of eggs in utero	4.342193628794542	0	NA	NA	NA	NA	NA	NA	NA	NA	NA
I	I:6439223	6439223	G	A	0.146497	-0.0416723	0.128285	0.745302	0.12766771334938387	Mean number of eggs in utero	4.342193628794542	0	NA	NA	NA	NA	NA	NA	NA	NA	NA
I	I:6457730	6457730	A	G	0.289809	-0.0124155	0.0772851	0.872373	0.05929778432725412	Mean number of eggs in utero	4.342193628794542	0	NA	NA	NA	NA	NA	NA	NA	NA	NA
I	I:6466786	6466786	T	C	0.0764331	-0.0564854	0.13136	0.667192	0.1757491697694257	Mean number of eggs in utero	4.342193628794542	0	NA	NA	NA	NA	NA	NA	NA	NA	NA
I	I:6478656	6478656	A	G	0.0636943	-0.0612712	0.371668	0.869058	0.06095123823558488	Mean number of eggs in utero	4.342193628794542	0	NA	NA	NA	NA	NA	NA	NA	NA	NA
I	I:6481440	6481440	T	G	0.146497	-0.0416723	0.128285	0.745302	0.12766771334938387	Mean number of eggs in utero	4.342193628794542	0	NA	NA	NA	NA	NA	NA	NA	NA	NA
I	I:6528222	6528222	G	T	0.0605096	-0.0847457	0.469001	0.856608	0.06721787397443497	Mean number of eggs in utero	4.342193628794542	0	NA	NA	NA	NA	NA	NA	NA	NA	NA
I	I:6541735	6541735	T	C	0.146497	-0.0416723	0.128285	0.745302	0.12766771334938387	Mean number of eggs in utero	4.342193628794542	0	NA	NA	NA	NA	NA	NA	NA	NA	NA
I	I:6592046	6592046	A	T	0.0605096	-0.0847457	0.469001	0.856608	0.06721787397443497	Mean number of eggs in utero	4.342193628794542	0	NA	NA	NA	NA	NA	NA	NA	NA	NA
I	I:6613417	6613417	A	G	0.143312	-0.0490666	0.131252	0.708527	0.14964359534229804	Mean number of eggs in utero	4.342193628794542	0	NA	NA	NA	NA	NA	NA	NA	NA	NA
I	I:6647320	6647320	A	G	0.0605096	-0.0847457	0.469001	0.856608	0.06721787397443497	Mean number of eggs in utero	4.342193628794542	0	NA	NA	NA	NA	NA	NA	NA	NA	NA
I	I:6651082	6651082	A	C	0.0955414	0.126139	0.136474	0.355346	0.44934856888823427	Mean number of eggs in utero	4.342193628794542	0	NA	NA	NA	NA	NA	NA	NA	NA	NA
I	I:6662728	6662728	A	C	0.0541401	0.158528	0.186666	0.395738	0.40259224541771504	Mean number of eggs in utero	4.342193628794542	0	NA	NA	NA	NA	NA	NA	NA	NA	NA
I	I:6682667	6682667	G	T	0.143312	-0.0490666	0.131252	0.708527	0.14964359534229804	Mean number of eggs in utero	4.342193628794542	0	NA	NA	NA	NA	NA	NA	NA	NA	NA
I	I:6704988	6704988	G	T	0.0605096	-0.0847457	0.469001	0.856608	0.06721787397443497	Mean number of eggs in utero	4.342193628794542	0	NA	NA	NA	NA	NA	NA	NA	NA	NA
I	I:6743890	6743890	C	A	0.143312	-0.0490666	0.131252	0.708527	0.14964359534229804	Mean number of eggs in utero	4.342193628794542	0	NA	NA	NA	NA	NA	NA	NA	NA	NA
I	I:6777479	6777479	G	T	0.0605096	-0.0847457	0.469001	0.856608	0.06721787397443497	Mean number of eggs in utero	4.342193628794542	0	NA	NA	NA	NA	NA	NA	NA	NA	NA
I	I:6792060	6792060	G	T	0.0509554	-0.0173869	0.155897	0.911198	0.04038724216635406	Mean number of eggs in utero	4.342193628794542	0	NA	NA	NA	NA	NA	NA	NA	NA	NA
I	I:6827582	6827582	T	G	0.143312	-0.0490666	0.131252	0.708527	0.14964359534229804	Mean number of eggs in utero	4.342193628794542	0	NA	NA	NA	NA	NA	NA	NA	NA	NA
I	I:6865635	6865635	A	T	0.066879	-0.183455	0.288685	0.525112	0.2797480569857773	Mean number of eggs in utero	4.342193628794542	0	NA	NA	NA	NA	NA	NA	NA	NA	NA
I	I:6870510	6870510	G	A	0.0509554	0.0351524	0.153064	0.818357	0.08705719839821399	Mean number of eggs in utero	4.342193628794542	0	NA	NA	NA	NA	NA	NA	NA	NA	NA
I	I:6920502	6920502	A	G	0.143312	-0.0490666	0.131252	0.708527	0.14964359534229804	Mean number of eggs in utero	4.342193628794542	0	NA	NA	NA	NA	NA	NA	NA	NA	NA
I	I:6922295	6922295	T	C	0.0605096	-0.0847457	0.469001	0.856608	0.06721787397443497	Mean number of eggs in utero	4.342193628794542	0	NA	NA	NA	NA	NA	NA	NA	NA	NA
I	I:6936570	6936570	A	G	0.0828025	0.0758853	0.131283	0.563245	0.2493026548762979	Mean number of eggs in utero	4.342193628794542	0	NA	NA	NA	NA	NA	NA	NA	NA	NA
I	I:6962135	6962135	A	G	0.0509554	-0.168231	0.13782	0.222217	0.6532227198155899	Mean number of eggs in utero	4.342193628794542	0	NA	NA	NA	NA	NA	NA	NA	NA	NA
I	I:6975186	6975186	A	C	0.0605096	-0.0847457	0.469001	0.856608	0.06721787397443497	Mean number of eggs in utero	4.342193628794542	0	NA	NA	NA	NA	NA	NA	NA	NA	NA
I	I:6977217	6977217	C	G	0.143312	-0.0490666	0.131252	0.708527	0.14964359534229804	Mean number of eggs in utero	4.342193628794542	0	NA	NA	NA	NA	NA	NA	NA	NA	NA
I	I:6988617	6988617	C	T	0.283439	0.00255612	0.0782464	0.97394	0.011467797198945816	Mean number of eggs in utero	4.342193628794542	0	NA	NA	NA	NA	NA	NA	NA	NA	NA
I	I:7025576	7025576	T	A	0.0605096	-0.0847457	0.469001	0.856608	0.06721787397443497	Mean number of eggs in utero	4.342193628794542	0	NA	NA	NA	NA	NA	NA	NA	NA	NA
I	I:7032272	7032272	T	A	0.140127	-0.0467414	0.135018	0.729204	0.13715095771705718	Mean number of eggs in utero	4.342193628794542	0	NA	NA	NA	NA	NA	NA	NA	NA	NA
I	I:7096169	7096169	T	C	0.0636943	-0.281715	0.358008	0.431342	0.3651782523104037	Mean number of eggs in utero	4.342193628794542	0	NA	NA	NA	NA	NA	NA	NA	NA	NA
I	I:7099887	7099887	A	G	0.089172	-0.0541011	0.138184	0.695417	0.1577546968624958	Mean number of eggs in utero	4.342193628794542	0	NA	NA	NA	NA	NA	NA	NA	NA	NA
I	I:7110740	7110740	C	G	0.140127	-0.0467414	0.135018	0.729204	0.13715095771705718	Mean number of eggs in utero	4.342193628794542	0	NA	NA	NA	NA	NA	NA	NA	NA	NA
I	I:7132732	7132732	C	T	0.0955414	-0.290424	0.13769700000000001	0.0349315	1.45678276484229	Mean number of eggs in utero	4.342193628794542	0	NA	NA	NA	NA	NA	NA	NA	NA	NA
I	I:7139720	7139720	G	A	0.0541401	0.158528	0.186666	0.395738	0.40259224541771504	Mean number of eggs in utero	4.342193628794542	0	NA	NA	NA	NA	NA	NA	NA	NA	NA
I	I:7159212	7159212	T	C	0.0605096	-0.0847457	0.469001	0.856608	0.06721787397443497	Mean number of eggs in utero	4.342193628794542	0	NA	NA	NA	NA	NA	NA	NA	NA	NA
I	I:7160755	7160755	C	T	0.066879	-0.0460738	0.140541	0.743039	0.12898839076124666	Mean number of eggs in utero	4.342193628794542	0	NA	NA	NA	NA	NA	NA	NA	NA	NA
I	I:7166778	7166778	G	A	0.0796178	0.102283	0.134209	0.445991	0.3506739051662767	Mean number of eggs in utero	4.342193628794542	0	NA	NA	NA	NA	NA	NA	NA	NA	NA
I	I:7185506	7185506	G	T	0.140127	-0.0467414	0.135018	0.729204	0.13715095771705718	Mean number of eggs in utero	4.342193628794542	0	NA	NA	NA	NA	NA	NA	NA	NA	NA
I	I:7210422	7210422	T	C	0.0636943	-0.0611503	0.379051	0.871838	0.0595642057121724	Mean number of eggs in utero	4.342193628794542	0	NA	NA	NA	NA	NA	NA	NA	NA	NA
I	I:7226216	7226216	T	A	0.0509554	-0.237475	0.143583	0.0981439	1.0081366882052536	Mean number of eggs in utero	4.342193628794542	0	NA	NA	NA	NA	NA	NA	NA	NA	NA
I	I:7233312	7233312	T	A	0.0955414	-0.290424	0.13769700000000001	0.0349315	1.45678276484229	Mean number of eggs in utero	4.342193628794542	0	NA	NA	NA	NA	NA	NA	NA	NA	NA
I	I:7242603	7242603	G	C	0.0573248	-0.184587	0.133574	0.167	0.7772835288524167	Mean number of eggs in utero	4.342193628794542	0	NA	NA	NA	NA	NA	NA	NA	NA	NA
I	I:7244116	7244116	C	G	0.140127	-0.0467414	0.135018	0.729204	0.13715095771705718	Mean number of eggs in utero	4.342193628794542	0	NA	NA	NA	NA	NA	NA	NA	NA	NA
I	I:7256246	7256246	A	T	0.0541401	0.158528	0.186666	0.395738	0.40259224541771504	Mean number of eggs in utero	4.342193628794542	0	NA	NA	NA	NA	NA	NA	NA	NA	NA
I	I:7267698	7267698	A	T	0.066879	0.016722	0.145667	0.908606	0.041624399638619476	Mean number of eggs in utero	4.342193628794542	0	NA	NA	NA	NA	NA	NA	NA	NA	NA
I	I:7282216	7282216	T	A	0.0859873	-0.097722	0.13077	0.454895	0.3420888367122374	Mean number of eggs in utero	4.342193628794542	0	NA	NA	NA	NA	NA	NA	NA	NA	NA
I	I:7283697	7283697	C	T	0.089172	-0.0343081	0.134207	0.798232	0.09787086594706806	Mean number of eggs in utero	4.342193628794542	0	NA	NA	NA	NA	NA	NA	NA	NA	NA
I	I:7315094	7315094	G	C	0.0636943	-0.0611503	0.379051	0.871838	0.0595642057121724	Mean number of eggs in utero	4.342193628794542	0	NA	NA	NA	NA	NA	NA	NA	NA	NA
I	I:7317204	7317204	C	A	0.066879	-0.0742737	0.140882	0.598051	0.2232617790982962	Mean number of eggs in utero	4.342193628794542	0	NA	NA	NA	NA	NA	NA	NA	NA	NA
I	I:7318059	7318059	G	T	0.0923567	-0.266907	0.140477	0.0574331	1.2408377416753187	Mean number of eggs in utero	4.342193628794542	0	NA	NA	NA	NA	NA	NA	NA	NA	NA
I	I:7320538	7320538	G	T	0.143312	-0.0772383	0.133159	0.561885	0.250352561612489	Mean number of eggs in utero	4.342193628794542	0	NA	NA	NA	NA	NA	NA	NA	NA	NA
I	I:7369304	7369304	C	A	0.143312	-0.0772383	0.133159	0.561885	0.250352561612489	Mean number of eggs in utero	4.342193628794542	0	NA	NA	NA	NA	NA	NA	NA	NA	NA
I	I:7369578	7369578	C	T	0.0605096	-0.0847457	0.469001	0.856608	0.06721787397443497	Mean number of eggs in utero	4.342193628794542	0	NA	NA	NA	NA	NA	NA	NA	NA	NA
I	I:7384400	7384400	G	T	0.0764331	-0.0498297	0.284915	0.861164	0.06491413366524512	Mean number of eggs in utero	4.342193628794542	0	NA	NA	NA	NA	NA	NA	NA	NA	NA
I	I:7395598	7395598	G	A	0.066879	-0.0742737	0.140882	0.598051	0.2232617790982962	Mean number of eggs in utero	4.342193628794542	0	NA	NA	NA	NA	NA	NA	NA	NA	NA
I	I:7420905	7420905	T	C	0.0541401	0.158528	0.186666	0.395738	0.40259224541771504	Mean number of eggs in utero	4.342193628794542	0	NA	NA	NA	NA	NA	NA	NA	NA	NA
I	I:7421718	7421718	T	C	0.143312	-0.0772383	0.133159	0.561885	0.250352561612489	Mean number of eggs in utero	4.342193628794542	0	NA	NA	NA	NA	NA	NA	NA	NA	NA
I	I:7429461	7429461	T	C	0.0605096	-0.0847457	0.469001	0.856608	0.06721787397443497	Mean number of eggs in utero	4.342193628794542	0	NA	NA	NA	NA	NA	NA	NA	NA	NA
I	I:7429665	7429665	G	A	0.0764331	-0.0498297	0.284915	0.861164	0.06491413366524512	Mean number of eggs in utero	4.342193628794542	0	NA	NA	NA	NA	NA	NA	NA	NA	NA
I	I:7433753	7433753	A	T	0.0828025	0.0623767	0.134498	0.642809	0.19191805128801107	Mean number of eggs in utero	4.342193628794542	0	NA	NA	NA	NA	NA	NA	NA	NA	NA
I	I:7459674	7459674	T	C	0.066879	-0.0742737	0.140882	0.598051	0.2232617790982962	Mean number of eggs in utero	4.342193628794542	0	NA	NA	NA	NA	NA	NA	NA	NA	NA
I	I:7463253	7463253	G	A	0.140127	-0.110586	0.135938	0.415929	0.38098079807484114	Mean number of eggs in utero	4.342193628794542	0	NA	NA	NA	NA	NA	NA	NA	NA	NA
I	I:7472206	7472206	A	C	0.0605096	-0.0847457	0.469001	0.856608	0.06721787397443497	Mean number of eggs in utero	4.342193628794542	0	NA	NA	NA	NA	NA	NA	NA	NA	NA
I	I:7503519	7503519	A	T	0.10828	-0.0419802	0.121318	0.729318	0.13708306765981046	Mean number of eggs in utero	4.342193628794542	0	NA	NA	NA	NA	NA	NA	NA	NA	NA
I	I:7513363	7513363	A	C	0.140127	-0.110586	0.135938	0.415929	0.38098079807484114	Mean number of eggs in utero	4.342193628794542	0	NA	NA	NA	NA	NA	NA	NA	NA	NA
I	I:7515501	7515501	C	T	0.0541401	0.158528	0.186666	0.395738	0.40259224541771504	Mean number of eggs in utero	4.342193628794542	0	NA	NA	NA	NA	NA	NA	NA	NA	NA
I	I:7531340	7531340	T	C	0.0796178	-0.105287	0.137129	0.442607	0.35398172182011806	Mean number of eggs in utero	4.342193628794542	0	NA	NA	NA	NA	NA	NA	NA	NA	NA
I	I:7538628	7538628	T	A	0.066879	0.246907	0.247807	0.319072	0.4961113054242763	Mean number of eggs in utero	4.342193628794542	0	NA	NA	NA	NA	NA	NA	NA	NA	NA
I	I:7544396	7544396	G	C	0.140127	-0.110586	0.135938	0.415929	0.38098079807484114	Mean number of eggs in utero	4.342193628794542	0	NA	NA	NA	NA	NA	NA	NA	NA	NA
I	I:7554011	7554011	A	C	0.0541401	0.158528	0.186666	0.395738	0.40259224541771504	Mean number of eggs in utero	4.342193628794542	0	NA	NA	NA	NA	NA	NA	NA	NA	NA
I	I:7564300	7564300	A	G	0.0796178	-0.105287	0.137129	0.442607	0.35398172182011806	Mean number of eggs in utero	4.342193628794542	0	NA	NA	NA	NA	NA	NA	NA	NA	NA
I	I:7587139	7587139	G	C	0.140127	-0.110586	0.135938	0.415929	0.38098079807484114	Mean number of eggs in utero	4.342193628794542	0	NA	NA	NA	NA	NA	NA	NA	NA	NA
I	I:7610205	7610205	C	T	0.0732484	-0.150857	0.286409	0.598389	0.22301639857141917	Mean number of eggs in utero	4.342193628794542	0	NA	NA	NA	NA	NA	NA	NA	NA	NA
I	I:7648451	7648451	T	C	0.0573248	-0.041264	0.400272	0.917892	0.03720841527295064	Mean number of eggs in utero	4.342193628794542	0	NA	NA	NA	NA	NA	NA	NA	NA	NA
I	I:7652237	7652237	C	T	0.143312	-0.096281	0.132732	0.468221	0.32954911182778834	Mean number of eggs in utero	4.342193628794542	0	NA	NA	NA	NA	NA	NA	NA	NA	NA
I	I:7657020	7657020	T	C	0.066879	-0.0950964	0.140011	0.497006	0.30363836830658225	Mean number of eggs in utero	4.342193628794542	0	NA	NA	NA	NA	NA	NA	NA	NA	NA
I	I:7673022	7673022	A	T	0.0859873	-0.0893367	0.13098	0.495198	0.30522111800796636	Mean number of eggs in utero	4.342193628794542	0	NA	NA	NA	NA	NA	NA	NA	NA	NA
I	I:7680300	7680300	G	A	0.0605096	-0.0847457	0.469001	0.856608	0.06721787397443497	Mean number of eggs in utero	4.342193628794542	0	NA	NA	NA	NA	NA	NA	NA	NA	NA
I	I:7681516	7681516	A	G	0.066879	-0.0950964	0.140011	0.497006	0.30363836830658225	Mean number of eggs in utero	4.342193628794542	0	NA	NA	NA	NA	NA	NA	NA	NA	NA
I	I:7681708	7681708	A	T	0.143312	-0.096281	0.132732	0.468221	0.32954911182778834	Mean number of eggs in utero	4.342193628794542	0	NA	NA	NA	NA	NA	NA	NA	NA	NA
I	I:7714338	7714338	T	G	0.0605096	-0.0847457	0.469001	0.856608	0.06721787397443497	Mean number of eggs in utero	4.342193628794542	0	NA	NA	NA	NA	NA	NA	NA	NA	NA
I	I:7714514	7714514	G	A	0.143312	-0.096281	0.132732	0.468221	0.32954911182778834	Mean number of eggs in utero	4.342193628794542	0	NA	NA	NA	NA	NA	NA	NA	NA	NA
I	I:7715173	7715173	T	C	0.0509554	-0.0749427	0.159587	0.638638	0.194745243799519	Mean number of eggs in utero	4.342193628794542	0	NA	NA	NA	NA	NA	NA	NA	NA	NA
I	I:7729916	7729916	T	C	0.0923567	-0.0308922	0.125175	0.80507	0.09416635653642463	Mean number of eggs in utero	4.342193628794542	0	NA	NA	NA	NA	NA	NA	NA	NA	NA
I	I:7736030	7736030	A	T	0.0509554	0.196924	0.213778	0.356966	0.44737314723675026	Mean number of eggs in utero	4.342193628794542	0	NA	NA	NA	NA	NA	NA	NA	NA	NA
I	I:7751305	7751305	C	A	0.066879	-0.0950964	0.140011	0.497006	0.30363836830658225	Mean number of eggs in utero	4.342193628794542	0	NA	NA	NA	NA	NA	NA	NA	NA	NA
I	I:7751771	7751771	A	T	0.089172	-0.231168	0.141281	0.101793	0.9922820861043572	Mean number of eggs in utero	4.342193628794542	0	NA	NA	NA	NA	NA	NA	NA	NA	NA
I	I:7752987	7752987	A	G	0.143312	-0.096281	0.132732	0.468221	0.32954911182778834	Mean number of eggs in utero	4.342193628794542	0	NA	NA	NA	NA	NA	NA	NA	NA	NA
I	I:7753503	7753503	A	T	0.0605096	-0.0847457	0.469001	0.856608	0.06721787397443497	Mean number of eggs in utero	4.342193628794542	0	NA	NA	NA	NA	NA	NA	NA	NA	NA
I	I:7754843	7754843	A	T	0.0764331	-0.0498297	0.284915	0.861164	0.06491413366524512	Mean number of eggs in utero	4.342193628794542	0	NA	NA	NA	NA	NA	NA	NA	NA	NA
I	I:7759192	7759192	T	G	0.0796178	-0.0413006	0.148856	0.781431	0.1071093639560144	Mean number of eggs in utero	4.342193628794542	0	NA	NA	NA	NA	NA	NA	NA	NA	NA
I	I:7764367	7764367	T	A	0.0700637	-0.0901846	0.139554	0.518127	0.2855637757007539	Mean number of eggs in utero	4.342193628794542	0	NA	NA	NA	NA	NA	NA	NA	NA	NA
I	I:7794358	7794358	C	T	0.0605096	-0.0847457	0.469001	0.856608	0.06721787397443497	Mean number of eggs in utero	4.342193628794542	0	NA	NA	NA	NA	NA	NA	NA	NA	NA
I	I:7797072	7797072	A	G	0.143312	-0.096281	0.132732	0.468221	0.32954911182778834	Mean number of eggs in utero	4.342193628794542	0	NA	NA	NA	NA	NA	NA	NA	NA	NA
I	I:7802091	7802091	T	A	0.0700637	-0.118821	0.136032	0.382402	0.41747984498722307	Mean number of eggs in utero	4.342193628794542	0	NA	NA	NA	NA	NA	NA	NA	NA	NA
I	I:7803471	7803471	A	G	0.105096	-0.0331545	0.120314	0.782881	0.10630424684496295	Mean number of eggs in utero	4.342193628794542	0	NA	NA	NA	NA	NA	NA	NA	NA	NA
I	I:7808939	7808939	T	A	0.0764331	-0.0498297	0.284915	0.861164	0.06491413366524512	Mean number of eggs in utero	4.342193628794542	0	NA	NA	NA	NA	NA	NA	NA	NA	NA
I	I:7815351	7815351	C	T	0.0828025	-0.0909703	0.133823	0.496644	0.30395480691052607	Mean number of eggs in utero	4.342193628794542	0	NA	NA	NA	NA	NA	NA	NA	NA	NA
I	I:7821409	7821409	A	T	0.0605096	-0.0847457	0.469001	0.856608	0.06721787397443497	Mean number of eggs in utero	4.342193628794542	0	NA	NA	NA	NA	NA	NA	NA	NA	NA
I	I:7823660	7823660	C	T	0.143312	-0.096281	0.132732	0.468221	0.32954911182778834	Mean number of eggs in utero	4.342193628794542	0	NA	NA	NA	NA	NA	NA	NA	NA	NA
I	I:7828290	7828290	G	A	0.066879	-0.0950964	0.140011	0.497006	0.30363836830658225	Mean number of eggs in utero	4.342193628794542	0	NA	NA	NA	NA	NA	NA	NA	NA	NA
I	I:7830004	7830004	T	C	0.089172	-0.231168	0.141281	0.101793	0.9922820861043572	Mean number of eggs in utero	4.342193628794542	0	NA	NA	NA	NA	NA	NA	NA	NA	NA
I	I:7854791	7854791	T	C	0.0828025	-0.0909703	0.133823	0.496644	0.30395480691052607	Mean number of eggs in utero	4.342193628794542	0	NA	NA	NA	NA	NA	NA	NA	NA	NA
I	I:7861190	7861190	G	A	0.143312	-0.096281	0.132732	0.468221	0.32954911182778834	Mean number of eggs in utero	4.342193628794542	0	NA	NA	NA	NA	NA	NA	NA	NA	NA
I	I:7861396	7861396	A	G	0.0605096	-0.0847457	0.469001	0.856608	0.06721787397443497	Mean number of eggs in utero	4.342193628794542	0	NA	NA	NA	NA	NA	NA	NA	NA	NA
I	I:7871337	7871337	G	A	0.066879	-0.0950964	0.140011	0.497006	0.30363836830658225	Mean number of eggs in utero	4.342193628794542	0	NA	NA	NA	NA	NA	NA	NA	NA	NA
I	I:7878413	7878413	G	A	0.0541401	-0.181913	0.21705	0.401967	0.39580959941845817	Mean number of eggs in utero	4.342193628794542	0	NA	NA	NA	NA	NA	NA	NA	NA	NA
I	I:7885858	7885858	A	G	0.0828025	-0.0909703	0.133823	0.496644	0.30395480691052607	Mean number of eggs in utero	4.342193628794542	0	NA	NA	NA	NA	NA	NA	NA	NA	NA
I	I:7893243	7893243	T	A	0.0605096	-0.0847457	0.469001	0.856608	0.06721787397443497	Mean number of eggs in utero	4.342193628794542	0	NA	NA	NA	NA	NA	NA	NA	NA	NA
I	I:7895919	7895919	T	C	0.143312	-0.096281	0.132732	0.468221	0.32954911182778834	Mean number of eggs in utero	4.342193628794542	0	NA	NA	NA	NA	NA	NA	NA	NA	NA
I	I:7904985	7904985	C	G	0.0923567	-0.266907	0.140477	0.0574331	1.2408377416753187	Mean number of eggs in utero	4.342193628794542	0	NA	NA	NA	NA	NA	NA	NA	NA	NA
I	I:7905858	7905858	T	C	0.066879	-0.0950964	0.140011	0.497006	0.30363836830658225	Mean number of eggs in utero	4.342193628794542	0	NA	NA	NA	NA	NA	NA	NA	NA	NA
I	I:7934235	7934235	A	G	0.0605096	-0.0847457	0.469001	0.856608	0.06721787397443497	Mean number of eggs in utero	4.342193628794542	0	NA	NA	NA	NA	NA	NA	NA	NA	NA
I	I:7934585	7934585	T	G	0.133758	-0.0848325	0.140074	0.544763	0.2637923971332913	Mean number of eggs in utero	4.342193628794542	0	NA	NA	NA	NA	NA	NA	NA	NA	NA
I	I:7935190	7935190	A	T	0.0732484	-0.0789983	0.141629	0.576993	0.23882945561344374	Mean number of eggs in utero	4.342193628794542	0	NA	NA	NA	NA	NA	NA	NA	NA	NA
I	I:7945399	7945399	A	T	0.0859873	-0.0458767	0.137566	0.738765	0.1314936880381424	Mean number of eggs in utero	4.342193628794542	0	NA	NA	NA	NA	NA	NA	NA	NA	NA
I	I:7955445	7955445	A	T	0.0955414	-0.0530731	0.128951	0.68065	0.16707615114602403	Mean number of eggs in utero	4.342193628794542	0	NA	NA	NA	NA	NA	NA	NA	NA	NA
I	I:7961783	7961783	T	C	0.334395	0.0974666	0.07742	0.208055	0.6818218427342073	Mean number of eggs in utero	4.342193628794542	0	NA	NA	NA	NA	NA	NA	NA	NA	NA
I	I:7968402	7968402	A	T	0.133758	-0.0848325	0.140074	0.544763	0.2637923971332913	Mean number of eggs in utero	4.342193628794542	0	NA	NA	NA	NA	NA	NA	NA	NA	NA
I	I:7969987	7969987	T	G	0.0732484	-0.0789983	0.141629	0.576993	0.23882945561344374	Mean number of eggs in utero	4.342193628794542	0	NA	NA	NA	NA	NA	NA	NA	NA	NA
I	I:7971037	7971037	C	T	0.0796178	0.127874	0.135081	0.343817	0.46367265346728137	Mean number of eggs in utero	4.342193628794542	0	NA	NA	NA	NA	NA	NA	NA	NA	NA
I	I:7973410	7973410	A	T	0.0605096	-0.0847457	0.469001	0.856608	0.06721787397443497	Mean number of eggs in utero	4.342193628794542	0	NA	NA	NA	NA	NA	NA	NA	NA	NA
I	I:8020044	8020044	C	T	0.133758	-0.0848325	0.140074	0.544763	0.2637923971332913	Mean number of eggs in utero	4.342193628794542	0	NA	NA	NA	NA	NA	NA	NA	NA	NA
I	I:8022089	8022089	C	T	0.0732484	-0.100487	0.135811	0.459356	0.337850606599335	Mean number of eggs in utero	4.342193628794542	0	NA	NA	NA	NA	NA	NA	NA	NA	NA
I	I:8039288	8039288	A	T	0.0605096	-0.0847457	0.469001	0.856608	0.06721787397443497	Mean number of eggs in utero	4.342193628794542	0	NA	NA	NA	NA	NA	NA	NA	NA	NA
I	I:8064240	8064240	C	G	0.089172	-0.299357	0.14383	0.037404	1.4270819516755353	Mean number of eggs in utero	4.342193628794542	0	NA	NA	NA	NA	NA	NA	NA	NA	NA
I	I:8071164	8071164	C	T	0.0732484	-0.0789983	0.141629	0.576993	0.23882945561344374	Mean number of eggs in utero	4.342193628794542	0	NA	NA	NA	NA	NA	NA	NA	NA	NA
I	I:8097415	8097415	T	C	0.0605096	-0.0847457	0.469001	0.856608	0.06721787397443497	Mean number of eggs in utero	4.342193628794542	0	NA	NA	NA	NA	NA	NA	NA	NA	NA
I	I:8099472	8099472	C	T	0.136943	-0.121807	0.136328	0.371595	0.429930138292547	Mean number of eggs in utero	4.342193628794542	0	NA	NA	NA	NA	NA	NA	NA	NA	NA
I	I:8109977	8109977	G	A	0.0796178	0.127874	0.135081	0.343817	0.46367265346728137	Mean number of eggs in utero	4.342193628794542	0	NA	NA	NA	NA	NA	NA	NA	NA	NA
I	I:8124285	8124285	T	A	0.0541401	-0.0852932	0.161287	0.596925	0.22408023190630832	Mean number of eggs in utero	4.342193628794542	0	NA	NA	NA	NA	NA	NA	NA	NA	NA
I	I:8124457	8124457	G	C	0.0732484	-0.0789983	0.141629	0.576993	0.23882945561344374	Mean number of eggs in utero	4.342193628794542	0	NA	NA	NA	NA	NA	NA	NA	NA	NA
I	I:8130509	8130509	G	T	0.0541401	0.158528	0.186666	0.395738	0.40259224541771504	Mean number of eggs in utero	4.342193628794542	0	NA	NA	NA	NA	NA	NA	NA	NA	NA
I	I:8153812	8153812	T	G	0.133758	-0.0848325	0.140074	0.544763	0.2637923971332913	Mean number of eggs in utero	4.342193628794542	0	NA	NA	NA	NA	NA	NA	NA	NA	NA
I	I:8153856	8153856	A	T	0.0605096	-0.0847457	0.469001	0.856608	0.06721787397443497	Mean number of eggs in utero	4.342193628794542	0	NA	NA	NA	NA	NA	NA	NA	NA	NA
I	I:8184797	8184797	A	C	0.0732484	-0.0789983	0.141629	0.576993	0.23882945561344374	Mean number of eggs in utero	4.342193628794542	0	NA	NA	NA	NA	NA	NA	NA	NA	NA
I	I:8191049	8191049	A	T	0.0541401	0.158528	0.186666	0.395738	0.40259224541771504	Mean number of eggs in utero	4.342193628794542	0	NA	NA	NA	NA	NA	NA	NA	NA	NA
I	I:8204141	8204141	A	T	0.0605096	-0.0847457	0.469001	0.856608	0.06721787397443497	Mean number of eggs in utero	4.342193628794542	0	NA	NA	NA	NA	NA	NA	NA	NA	NA
I	I:8220239	8220239	C	T	0.270701	-0.046171	0.0784304	0.556071	0.25486975349059166	Mean number of eggs in utero	4.342193628794542	0	NA	NA	NA	NA	NA	NA	NA	NA	NA
I	I:8246539	8246539	T	A	0.101911	-0.0286078	0.129002	0.824499	0.0838098667565701	Mean number of eggs in utero	4.342193628794542	0	NA	NA	NA	NA	NA	NA	NA	NA	NA
I	I:8251027	8251027	G	A	0.140127	-0.0456323	0.132056	0.72968	0.1368675572812149	Mean number of eggs in utero	4.342193628794542	0	NA	NA	NA	NA	NA	NA	NA	NA	NA
I	I:8264034	8264034	A	T	0.0605096	-0.0847457	0.469001	0.856608	0.06721787397443497	Mean number of eggs in utero	4.342193628794542	0	NA	NA	NA	NA	NA	NA	NA	NA	NA
I	I:8296447	8296447	T	A	0.0573248	0.13295	0.165091	0.420641	0.37608839877773326	Mean number of eggs in utero	4.342193628794542	0	NA	NA	NA	NA	NA	NA	NA	NA	NA
I	I:8318265	8318265	T	A	0.149682	-0.0601283	0.126491	0.634532	0.19754647116898413	Mean number of eggs in utero	4.342193628794542	0	NA	NA	NA	NA	NA	NA	NA	NA	NA
I	I:8331243	8331243	T	A	0.066879	-0.0883131	0.326969	0.787086	0.10397781238692667	Mean number of eggs in utero	4.342193628794542	0	NA	NA	NA	NA	NA	NA	NA	NA	NA
I	I:8333166	8333166	A	T	0.089172	0.00449716	0.140628	0.974489	0.011223058820616787	Mean number of eggs in utero	4.342193628794542	0	NA	NA	NA	NA	NA	NA	NA	NA	NA
I	I:8351629	8351629	C	T	0.089172	-0.0548069	0.127475	0.667237	0.17571987896160748	Mean number of eggs in utero	4.342193628794542	0	NA	NA	NA	NA	NA	NA	NA	NA	NA
I	I:8359003	8359003	T	A	0.149682	-0.0601283	0.126491	0.634532	0.19754647116898413	Mean number of eggs in utero	4.342193628794542	0	NA	NA	NA	NA	NA	NA	NA	NA	NA
I	I:8361402	8361402	A	T	0.0828025	-0.0707331	0.192763	0.713661	0.1465080358304104	Mean number of eggs in utero	4.342193628794542	0	NA	NA	NA	NA	NA	NA	NA	NA	NA
I	I:8368174	8368174	A	G	0.207006	0.136256	0.0830738	0.100968	0.9958162462713976	Mean number of eggs in utero	4.342193628794542	0	NA	NA	NA	NA	NA	NA	NA	NA	NA
I	I:8370101	8370101	G	C	0.0605096	-0.0847457	0.469001	0.856608	0.06721787397443497	Mean number of eggs in utero	4.342193628794542	0	NA	NA	NA	NA	NA	NA	NA	NA	NA
I	I:8416678	8416678	T	A	0.213376	-0.0235359	0.0959239	0.806178	0.09356905759572877	Mean number of eggs in utero	4.342193628794542	0	NA	NA	NA	NA	NA	NA	NA	NA	NA
I	I:8416679	8416679	T	A	0.10828	-0.078298	0.118893	0.510181	0.29227571928327684	Mean number of eggs in utero	4.342193628794542	0	NA	NA	NA	NA	NA	NA	NA	NA	NA
I	I:8418669	8418669	A	T	0.149682	-0.0601283	0.126491	0.634532	0.19754647116898413	Mean number of eggs in utero	4.342193628794542	0	NA	NA	NA	NA	NA	NA	NA	NA	NA
I	I:8420748	8420748	T	A	0.089172	-0.0548069	0.127475	0.667237	0.17571987896160748	Mean number of eggs in utero	4.342193628794542	0	NA	NA	NA	NA	NA	NA	NA	NA	NA
I	I:8422150	8422150	A	G	0.066879	-0.0379711	0.136974	0.781616	0.10700655901217425	Mean number of eggs in utero	4.342193628794542	0	NA	NA	NA	NA	NA	NA	NA	NA	NA
I	I:8425866	8425866	C	T	0.0605096	-0.0847457	0.469001	0.856608	0.06721787397443497	Mean number of eggs in utero	4.342193628794542	0	NA	NA	NA	NA	NA	NA	NA	NA	NA
I	I:8458046	8458046	C	T	0.0796178	0.0195128	0.136035	0.885943	0.05259421895018499	Mean number of eggs in utero	4.342193628794542	0	NA	NA	NA	NA	NA	NA	NA	NA	NA
I	I:8475107	8475107	A	C	0.143312	-0.0631495	0.129773	0.626531	0.2030574357698092	Mean number of eggs in utero	4.342193628794542	0	NA	NA	NA	NA	NA	NA	NA	NA	NA
I	I:8479927	8479927	A	C	0.0605096	-0.0847457	0.469001	0.856608	0.06721787397443497	Mean number of eggs in utero	4.342193628794542	0	NA	NA	NA	NA	NA	NA	NA	NA	NA
I	I:8481375	8481375	T	A	0.105096	-0.0331545	0.120314	0.782881	0.10630424684496295	Mean number of eggs in utero	4.342193628794542	0	NA	NA	NA	NA	NA	NA	NA	NA	NA
I	I:8486366	8486366	A	T	0.0828025	-0.0582847	0.131619	0.65789	0.18184671487629922	Mean number of eggs in utero	4.342193628794542	0	NA	NA	NA	NA	NA	NA	NA	NA	NA
I	I:8527702	8527702	T	A	0.0796178	-0.106555	0.127244	0.402362	0.3953830417930524	Mean number of eggs in utero	4.342193628794542	0	NA	NA	NA	NA	NA	NA	NA	NA	NA
I	I:8531497	8531497	A	T	0.0605096	-0.0847457	0.469001	0.856608	0.06721787397443497	Mean number of eggs in utero	4.342193628794542	0	NA	NA	NA	NA	NA	NA	NA	NA	NA
I	I:8536061	8536061	C	G	0.143312	-0.0631495	0.129773	0.626531	0.2030574357698092	Mean number of eggs in utero	4.342193628794542	0	NA	NA	NA	NA	NA	NA	NA	NA	NA
I	I:8553026	8553026	T	C	0.0828025	-0.0582847	0.131619	0.65789	0.18184671487629922	Mean number of eggs in utero	4.342193628794542	0	NA	NA	NA	NA	NA	NA	NA	NA	NA
I	I:8556080	8556080	A	G	0.0796178	-0.0413006	0.148856	0.781431	0.1071093639560144	Mean number of eggs in utero	4.342193628794542	0	NA	NA	NA	NA	NA	NA	NA	NA	NA
I	I:8576601	8576601	A	T	0.143312	-0.0631495	0.129773	0.626531	0.2030574357698092	Mean number of eggs in utero	4.342193628794542	0	NA	NA	NA	NA	NA	NA	NA	NA	NA
I	I:8589890	8589890	T	A	0.11465	-0.0451083	0.120046	0.707097	0.150521005333032	Mean number of eggs in utero	4.342193628794542	0	NA	NA	NA	NA	NA	NA	NA	NA	NA
I	I:8592225	8592225	T	A	0.0828025	-0.0582847	0.131619	0.65789	0.18184671487629922	Mean number of eggs in utero	4.342193628794542	0	NA	NA	NA	NA	NA	NA	NA	NA	NA
I	I:8600385	8600385	A	G	0.0636943	-0.0611503	0.379051	0.871838	0.0595642057121724	Mean number of eggs in utero	4.342193628794542	0	NA	NA	NA	NA	NA	NA	NA	NA	NA
I	I:8613612	8613612	T	A	0.105096	-0.0869158	0.12536	0.488104	0.31148763329654267	Mean number of eggs in utero	4.342193628794542	0	NA	NA	NA	NA	NA	NA	NA	NA	NA
I	I:8613645	8613645	G	T	0.143312	-0.0631495	0.129773	0.626531	0.2030574357698092	Mean number of eggs in utero	4.342193628794542	0	NA	NA	NA	NA	NA	NA	NA	NA	NA
I	I:8617876	8617876	A	T	0.0987261	-0.0427505	0.124693	0.731713	0.13565922899269547	Mean number of eggs in utero	4.342193628794542	0	NA	NA	NA	NA	NA	NA	NA	NA	NA
I	I:8618659	8618659	A	C	0.0764331	-0.0408866	0.13498	0.76196	0.11806782686938153	Mean number of eggs in utero	4.342193628794542	0	NA	NA	NA	NA	NA	NA	NA	NA	NA
I	I:8634236	8634236	T	A	0.0605096	0.0160182	0.302935	0.95783	0.01871156463062325	Mean number of eggs in utero	4.342193628794542	0	NA	NA	NA	NA	NA	NA	NA	NA	NA
I	I:8649300	8649300	G	T	0.0605096	-0.0273179	0.303536	0.928288	0.0323172636450042	Mean number of eggs in utero	4.342193628794542	0	NA	NA	NA	NA	NA	NA	NA	NA	NA
I	I:8653075	8653075	G	C	0.143312	-0.0631495	0.129773	0.626531	0.2030574357698092	Mean number of eggs in utero	4.342193628794542	0	NA	NA	NA	NA	NA	NA	NA	NA	NA
I	I:8667370	8667370	G	A	0.0764331	-0.0408866	0.13498	0.76196	0.11806782686938153	Mean number of eggs in utero	4.342193628794542	0	NA	NA	NA	NA	NA	NA	NA	NA	NA
I	I:8672201	8672201	G	T	0.254777	-0.038325	0.0792231	0.628556	0.20165602361436316	Mean number of eggs in utero	4.342193628794542	0	NA	NA	NA	NA	NA	NA	NA	NA	NA
I	I:8682243	8682243	A	T	0.0987261	-0.0885258	0.116997	0.44926	0.34750224722625794	Mean number of eggs in utero	4.342193628794542	0	NA	NA	NA	NA	NA	NA	NA	NA	NA
I	I:8685646	8685646	A	G	0.0605096	-0.0847457	0.469001	0.856608	0.06721787397443497	Mean number of eggs in utero	4.342193628794542	0	NA	NA	NA	NA	NA	NA	NA	NA	NA
I	I:8696676	8696676	C	A	0.0764331	-0.0408866	0.13498	0.76196	0.11806782686938153	Mean number of eggs in utero	4.342193628794542	0	NA	NA	NA	NA	NA	NA	NA	NA	NA
I	I:8709713	8709713	C	A	0.146497	-0.0872563	0.127245	0.49288	0.3072588042146468	Mean number of eggs in utero	4.342193628794542	0	NA	NA	NA	NA	NA	NA	NA	NA	NA
I	I:8724758	8724758	A	C	0.0605096	-0.0847457	0.469001	0.856608	0.06721787397443497	Mean number of eggs in utero	4.342193628794542	0	NA	NA	NA	NA	NA	NA	NA	NA	NA
I	I:8752748	8752748	A	G	0.0828025	-0.0582847	0.131619	0.65789	0.18184671487629922	Mean number of eggs in utero	4.342193628794542	0	NA	NA	NA	NA	NA	NA	NA	NA	NA
I	I:8768490	8768490	T	A	0.0605096	-0.0847457	0.469001	0.856608	0.06721787397443497	Mean number of eggs in utero	4.342193628794542	0	NA	NA	NA	NA	NA	NA	NA	NA	NA
I	I:8776718	8776718	T	C	0.0796178	0.0195128	0.136035	0.885943	0.05259421895018499	Mean number of eggs in utero	4.342193628794542	0	NA	NA	NA	NA	NA	NA	NA	NA	NA
I	I:8777447	8777447	G	A	0.146497	-0.0872563	0.127245	0.49288	0.3072588042146468	Mean number of eggs in utero	4.342193628794542	0	NA	NA	NA	NA	NA	NA	NA	NA	NA
I	I:8805428	8805428	T	A	0.143312	-0.0631495	0.129773	0.626531	0.2030574357698092	Mean number of eggs in utero	4.342193628794542	0	NA	NA	NA	NA	NA	NA	NA	NA	NA
I	I:8811303	8811303	A	T	0.0605096	-0.0847457	0.469001	0.856608	0.06721787397443497	Mean number of eggs in utero	4.342193628794542	0	NA	NA	NA	NA	NA	NA	NA	NA	NA
I	I:8819470	8819470	G	C	0.089172	-0.299357	0.14383	0.037404	1.4270819516755353	Mean number of eggs in utero	4.342193628794542	0	NA	NA	NA	NA	NA	NA	NA	NA	NA
I	I:8825655	8825655	C	T	0.251592	-0.0433695	0.0793546	0.584703	0.23306467787452853	Mean number of eggs in utero	4.342193628794542	0	NA	NA	NA	NA	NA	NA	NA	NA	NA
I	I:8826758	8826758	A	T	0.0859873	-0.0544744	0.12784	0.670025	0.173908992583517	Mean number of eggs in utero	4.342193628794542	0	NA	NA	NA	NA	NA	NA	NA	NA	NA
I	I:8839955	8839955	T	A	0.0700637	-0.102768	0.14322	0.473032	0.3251094788111546	Mean number of eggs in utero	4.342193628794542	0	NA	NA	NA	NA	NA	NA	NA	NA	NA
I	I:8851692	8851692	T	C	0.0509554	0.0463836	0.141921	0.743798	0.12854499375081818	Mean number of eggs in utero	4.342193628794542	0	NA	NA	NA	NA	NA	NA	NA	NA	NA
I	I:8861569	8861569	T	C	0.143312	-0.0631495	0.129773	0.626531	0.2030574357698092	Mean number of eggs in utero	4.342193628794542	0	NA	NA	NA	NA	NA	NA	NA	NA	NA
I	I:8874503	8874503	G	A	0.0605096	-0.0847457	0.469001	0.856608	0.06721787397443497	Mean number of eggs in utero	4.342193628794542	0	NA	NA	NA	NA	NA	NA	NA	NA	NA
I	I:8879384	8879384	A	C	0.0796178	-0.0699134	0.134167	0.602303	0.22018497365458814	Mean number of eggs in utero	4.342193628794542	0	NA	NA	NA	NA	NA	NA	NA	NA	NA
I	I:8907099	8907099	G	A	0.143312	-0.0986989	0.129246	0.445074	0.3515677752666503	Mean number of eggs in utero	4.342193628794542	0	NA	NA	NA	NA	NA	NA	NA	NA	NA
I	I:8914311	8914311	C	T	0.0605096	-0.0847457	0.469001	0.856608	0.06721787397443497	Mean number of eggs in utero	4.342193628794542	0	NA	NA	NA	NA	NA	NA	NA	NA	NA
I	I:8929033	8929033	G	C	0.0796178	-0.0699134	0.134167	0.602303	0.22018497365458814	Mean number of eggs in utero	4.342193628794542	0	NA	NA	NA	NA	NA	NA	NA	NA	NA
I	I:8940615	8940615	A	G	0.0541401	-0.0508457	0.190303	0.789328	0.1027424911008689	Mean number of eggs in utero	4.342193628794542	0	NA	NA	NA	NA	NA	NA	NA	NA	NA
I	I:8975357	8975357	G	A	0.0796178	-0.0699134	0.134167	0.602303	0.22018497365458814	Mean number of eggs in utero	4.342193628794542	0	NA	NA	NA	NA	NA	NA	NA	NA	NA
I	I:8983547	8983547	A	T	0.143312	-0.0986989	0.129246	0.445074	0.3515677752666503	Mean number of eggs in utero	4.342193628794542	0	NA	NA	NA	NA	NA	NA	NA	NA	NA
I	I:9014173	9014173	G	C	0.0700637	-0.102542	0.256902	0.689784	0.16128688360199986	Mean number of eggs in utero	4.342193628794542	0	NA	NA	NA	NA	NA	NA	NA	NA	NA
I	I:9046450	9046450	G	T	0.121019	-0.131231	0.142148	0.355904	0.4486671309392125	Mean number of eggs in utero	4.342193628794542	0	NA	NA	NA	NA	NA	NA	NA	NA	NA
I	I:9047642	9047642	A	T	0.0732484	-0.0673125	0.13177	0.609468	0.21504909199515676	Mean number of eggs in utero	4.342193628794542	0	NA	NA	NA	NA	NA	NA	NA	NA	NA
I	I:9053974	9053974	A	G	0.0509554	-0.133154	0.164162	0.417301	0.37955057456468333	Mean number of eggs in utero	4.342193628794542	0	NA	NA	NA	NA	NA	NA	NA	NA	NA
I	I:9071180	9071180	A	T	0.0732484	-0.0164397	0.204779	0.936014	0.028717655452839105	Mean number of eggs in utero	4.342193628794542	0	NA	NA	NA	NA	NA	NA	NA	NA	NA
I	I:9084319	9084319	A	G	0.0509554	-0.133154	0.164162	0.417301	0.37955057456468333	Mean number of eggs in utero	4.342193628794542	0	NA	NA	NA	NA	NA	NA	NA	NA	NA
I	I:9084707	9084707	A	T	0.0636943	0.145593	0.280177	0.603311	0.21945875624210773	Mean number of eggs in utero	4.342193628794542	0	NA	NA	NA	NA	NA	NA	NA	NA	NA
I	I:9088706	9088706	G	A	0.121019	-0.131231	0.142148	0.355904	0.4486671309392125	Mean number of eggs in utero	4.342193628794542	0	NA	NA	NA	NA	NA	NA	NA	NA	NA
I	I:9120952	9120952	T	A	0.0859873	-0.104548	0.147915	0.479686	0.31904295656323	Mean number of eggs in utero	4.342193628794542	0	NA	NA	NA	NA	NA	NA	NA	NA	NA
I	I:9125275	9125275	C	T	0.0509554	-0.133154	0.164162	0.417301	0.37955057456468333	Mean number of eggs in utero	4.342193628794542	0	NA	NA	NA	NA	NA	NA	NA	NA	NA
I	I:9126239	9126239	G	T	0.121019	-0.131231	0.142148	0.355904	0.4486671309392125	Mean number of eggs in utero	4.342193628794542	0	NA	NA	NA	NA	NA	NA	NA	NA	NA
I	I:9132101	9132101	C	T	0.0605096	-0.0847457	0.469001	0.856608	0.06721787397443497	Mean number of eggs in utero	4.342193628794542	0	NA	NA	NA	NA	NA	NA	NA	NA	NA
I	I:9171168	9171168	C	T	0.121019	-0.131231	0.142148	0.355904	0.4486671309392125	Mean number of eggs in utero	4.342193628794542	0	NA	NA	NA	NA	NA	NA	NA	NA	NA
I	I:9177499	9177499	A	G	0.0605096	-0.0847457	0.469001	0.856608	0.06721787397443497	Mean number of eggs in utero	4.342193628794542	0	NA	NA	NA	NA	NA	NA	NA	NA	NA
I	I:9182677	9182677	A	T	0.0732484	-0.176498	0.144144	0.220779	0.6560422380889069	Mean number of eggs in utero	4.342193628794542	0	NA	NA	NA	NA	NA	NA	NA	NA	NA
I	I:9189216	9189216	T	A	0.0509554	-0.133154	0.164162	0.417301	0.37955057456468333	Mean number of eggs in utero	4.342193628794542	0	NA	NA	NA	NA	NA	NA	NA	NA	NA
I	I:9204100	9204100	A	T	0.066879	-0.07484	0.148479	0.61423	0.21166897572056773	Mean number of eggs in utero	4.342193628794542	0	NA	NA	NA	NA	NA	NA	NA	NA	NA
I	I:9210734	9210734	G	A	0.111465	-0.134973	0.15919	0.396507	0.40174914117225813	Mean number of eggs in utero	4.342193628794542	0	NA	NA	NA	NA	NA	NA	NA	NA	NA
I	I:9213520	9213520	A	C	0.0732484	0.0109832	0.137195	0.936194	0.028634146561750687	Mean number of eggs in utero	4.342193628794542	0	NA	NA	NA	NA	NA	NA	NA	NA	NA
I	I:9217344	9217344	T	G	0.0605096	-0.0847457	0.469001	0.856608	0.06721787397443497	Mean number of eggs in utero	4.342193628794542	0	NA	NA	NA	NA	NA	NA	NA	NA	NA
I	I:9245784	9245784	A	T	0.33121	0.0729635	0.0714768	0.30735	0.5123667825431237	Mean number of eggs in utero	4.342193628794542	0	NA	NA	NA	NA	NA	NA	NA	NA	NA
I	I:9270945	9270945	C	A	0.124204	-0.139439	0.139498	0.317514	0.49823712080129484	Mean number of eggs in utero	4.342193628794542	0	NA	NA	NA	NA	NA	NA	NA	NA	NA
I	I:9316027	9316027	C	T	0.0636943	-0.215468	0.348897	0.536859	0.27013976190315625	Mean number of eggs in utero	4.342193628794542	0	NA	NA	NA	NA	NA	NA	NA	NA	NA
I	I:9337804	9337804	A	G	0.124204	-0.129207	0.138939	0.352397	0.45296779744782023	Mean number of eggs in utero	4.342193628794542	0	NA	NA	NA	NA	NA	NA	NA	NA	NA
I	I:9349926	9349926	G	A	0.0636943	-0.215468	0.348897	0.536859	0.27013976190315625	Mean number of eggs in utero	4.342193628794542	0	NA	NA	NA	NA	NA	NA	NA	NA	NA
I	I:9358654	9358654	A	T	0.0605096	-0.0900002	0.146585	0.539228	0.2682275646742001	Mean number of eggs in utero	4.342193628794542	0	NA	NA	NA	NA	NA	NA	NA	NA	NA
I	I:9364124	9364124	T	A	0.0923567	0.0106462	0.13154	0.935493	0.028959457840879024	Mean number of eggs in utero	4.342193628794542	0	NA	NA	NA	NA	NA	NA	NA	NA	NA
I	I:9372659	9372659	T	C	0.0636943	-0.0631815	0.273301	0.817175	0.08768492829525157	Mean number of eggs in utero	4.342193628794542	0	NA	NA	NA	NA	NA	NA	NA	NA	NA
I	I:9376508	9376508	T	A	0.11465	-0.151497	0.152747	0.321287	0.4931068466317521	Mean number of eggs in utero	4.342193628794542	0	NA	NA	NA	NA	NA	NA	NA	NA	NA
I	I:9377462	9377462	T	A	0.0732484	0.0109832	0.137195	0.936194	0.028634146561750687	Mean number of eggs in utero	4.342193628794542	0	NA	NA	NA	NA	NA	NA	NA	NA	NA
I	I:9401720	9401720	C	T	0.0764331	-0.116456	0.224655	0.604196	0.21882215424260923	Mean number of eggs in utero	4.342193628794542	0	NA	NA	NA	NA	NA	NA	NA	NA	NA
I	I:9426463	9426463	A	T	0.127389	-0.14554	0.139768	0.297737	0.5261671918989851	Mean number of eggs in utero	4.342193628794542	0	NA	NA	NA	NA	NA	NA	NA	NA	NA
I	I:9430889	9430889	A	C	0.0605096	0.0272342	0.141951	0.847855	0.07167841435219957	Mean number of eggs in utero	4.342193628794542	0	NA	NA	NA	NA	NA	NA	NA	NA	NA
I	I:9447242	9447242	T	A	0.066879	0.0967982	0.347935	0.780853	0.10743071682398626	Mean number of eggs in utero	4.342193628794542	0	NA	NA	NA	NA	NA	NA	NA	NA	NA
I	I:9483784	9483784	A	T	0.0732484	-0.0244861	0.221875	0.912124	0.039946116874367214	Mean number of eggs in utero	4.342193628794542	0	NA	NA	NA	NA	NA	NA	NA	NA	NA
I	I:9485127	9485127	G	A	0.133758	-0.0282868	0.105175	0.787968	0.10349141919269052	Mean number of eggs in utero	4.342193628794542	0	NA	NA	NA	NA	NA	NA	NA	NA	NA
I	I:9490102	9490102	A	G	0.111465	-0.199861	0.127895	0.118125	0.9276581784826806	Mean number of eggs in utero	4.342193628794542	0	NA	NA	NA	NA	NA	NA	NA	NA	NA
I	I:9500296	9500296	C	A	0.066879	-0.0101399	0.299743	0.973014	0.011880910935137098	Mean number of eggs in utero	4.342193628794542	0	NA	NA	NA	NA	NA	NA	NA	NA	NA
I	I:9502976	9502976	T	A	0.0605096	0.0272342	0.141951	0.847855	0.07167841435219957	Mean number of eggs in utero	4.342193628794542	0	NA	NA	NA	NA	NA	NA	NA	NA	NA
I	I:9513527	9513527	G	A	0.0636943	-0.0311171	0.138123	0.821757	0.08525658776544341	Mean number of eggs in utero	4.342193628794542	0	NA	NA	NA	NA	NA	NA	NA	NA	NA
I	I:9514469	9514469	A	G	0.0509554	-0.0711695	0.148746	0.63232	0.19906308142848472	Mean number of eggs in utero	4.342193628794542	0	NA	NA	NA	NA	NA	NA	NA	NA	NA
I	I:9519129	9519129	A	G	0.143312	-0.0983646	0.128243	0.443072	0.35352569440467657	Mean number of eggs in utero	4.342193628794542	0	NA	NA	NA	NA	NA	NA	NA	NA	NA
I	I:9556211	9556211	G	A	0.0605096	-0.0847457	0.469001	0.856608	0.06721787397443497	Mean number of eggs in utero	4.342193628794542	0	NA	NA	NA	NA	NA	NA	NA	NA	NA
I	I:9567168	9567168	T	C	0.0828025	-0.200807	0.143662	0.16218	0.7900027039176309	Mean number of eggs in utero	4.342193628794542	0	NA	NA	NA	NA	NA	NA	NA	NA	NA
I	I:9588619	9588619	C	T	0.0636943	-0.0742125	0.147064	0.613821	0.21195825759838222	Mean number of eggs in utero	4.342193628794542	0	NA	NA	NA	NA	NA	NA	NA	NA	NA
I	I:9594302	9594302	A	T	0.149682	-0.0834497	0.125438	0.50588	0.29595249011373825	Mean number of eggs in utero	4.342193628794542	0	NA	NA	NA	NA	NA	NA	NA	NA	NA
I	I:9605322	9605322	G	A	0.0764331	-0.0861752	0.147918	0.56017	0.2516801536047955	Mean number of eggs in utero	4.342193628794542	0	NA	NA	NA	NA	NA	NA	NA	NA	NA
I	I:9611130	9611130	C	A	0.0541401	0.176612	0.366833	0.630196	0.200524357720954	Mean number of eggs in utero	4.342193628794542	0	NA	NA	NA	NA	NA	NA	NA	NA	NA
I	I:9628648	9628648	A	G	0.0509554	-0.0899594	0.157071	0.566827	0.24654947093034218	Mean number of eggs in utero	4.342193628794542	0	NA	NA	NA	NA	NA	NA	NA	NA	NA
I	I:9647866	9647866	A	C	0.130573	-0.0852913	0.138196	0.537118	0.2699302932218092	Mean number of eggs in utero	4.342193628794542	0	NA	NA	NA	NA	NA	NA	NA	NA	NA
I	I:9651486	9651486	T	A	0.066879	-0.0812696	0.141825	0.566627	0.24670273501919288	Mean number of eggs in utero	4.342193628794542	0	NA	NA	NA	NA	NA	NA	NA	NA	NA
I	I:9672590	9672590	G	A	0.130573	-0.0852913	0.138196	0.537118	0.2699302932218092	Mean number of eggs in utero	4.342193628794542	0	NA	NA	NA	NA	NA	NA	NA	NA	NA
I	I:9691261	9691261	A	T	0.0605096	-0.0847457	0.469001	0.856608	0.06721787397443497	Mean number of eggs in utero	4.342193628794542	0	NA	NA	NA	NA	NA	NA	NA	NA	NA
I	I:9692061	9692061	A	T	0.0636943	-0.0552879	0.14429	0.701592	0.15391537171679293	Mean number of eggs in utero	4.342193628794542	0	NA	NA	NA	NA	NA	NA	NA	NA	NA
I	I:9707125	9707125	G	A	0.0541401	-0.19142700000000001	0.202661	0.344879	0.46233324941858356	Mean number of eggs in utero	4.342193628794542	0	NA	NA	NA	NA	NA	NA	NA	NA	NA
I	I:9726644	9726644	A	C	0.0509554	-0.0967505	0.152273	0.525185	0.27968768644824366	Mean number of eggs in utero	4.342193628794542	0	NA	NA	NA	NA	NA	NA	NA	NA	NA
I	I:9731891	9731891	C	A	0.136943	-0.0712767	0.128633	0.579504	0.23694356199213287	Mean number of eggs in utero	4.342193628794542	0	NA	NA	NA	NA	NA	NA	NA	NA	NA
I	I:9736280	9736280	C	T	0.0605096	-0.0847457	0.469001	0.856608	0.06721787397443497	Mean number of eggs in utero	4.342193628794542	0	NA	NA	NA	NA	NA	NA	NA	NA	NA
I	I:9740192	9740192	A	T	0.089172	-0.0634544	0.122794	0.605327	0.21800995438829818	Mean number of eggs in utero	4.342193628794542	0	NA	NA	NA	NA	NA	NA	NA	NA	NA
I	I:9752695	9752695	A	C	0.0509554	-0.0967505	0.152273	0.525185	0.27968768644824366	Mean number of eggs in utero	4.342193628794542	0	NA	NA	NA	NA	NA	NA	NA	NA	NA
I	I:9759790	9759790	T	C	0.0605096	-0.0847457	0.469001	0.856608	0.06721787397443497	Mean number of eggs in utero	4.342193628794542	0	NA	NA	NA	NA	NA	NA	NA	NA	NA
I	I:9760941	9760941	A	G	0.0764331	-0.0200161	0.233483	0.931682	0.030732294954546085	Mean number of eggs in utero	4.342193628794542	0	NA	NA	NA	NA	NA	NA	NA	NA	NA
I	I:9766110	9766110	T	C	0.136943	-0.0712767	0.128633	0.579504	0.23694356199213287	Mean number of eggs in utero	4.342193628794542	0	NA	NA	NA	NA	NA	NA	NA	NA	NA
I	I:9797024	9797024	G	A	0.130573	-0.0840498	0.135466	0.534963	0.27167625433673315	Mean number of eggs in utero	4.342193628794542	0	NA	NA	NA	NA	NA	NA	NA	NA	NA
I	I:9801940	9801940	G	A	0.0700637	-0.0791085	0.137327	0.564575	0.24827835679914542	Mean number of eggs in utero	4.342193628794542	0	NA	NA	NA	NA	NA	NA	NA	NA	NA
I	I:9802626	9802626	T	C	0.0605096	-0.0847457	0.469001	0.856608	0.06721787397443497	Mean number of eggs in utero	4.342193628794542	0	NA	NA	NA	NA	NA	NA	NA	NA	NA
I	I:9816207	9816207	C	A	0.117834	-0.181827	0.123094	0.139638	0.8549963801040924	Mean number of eggs in utero	4.342193628794542	0	NA	NA	NA	NA	NA	NA	NA	NA	NA
I	I:9823961	9823961	G	A	0.0509554	-0.116171	0.149685	0.437691	0.35883238345433527	Mean number of eggs in utero	4.342193628794542	0	NA	NA	NA	NA	NA	NA	NA	NA	NA
I	I:9830718	9830718	A	T	0.089172	-0.0237088	0.127384	0.852349	0.06938254403667558	Mean number of eggs in utero	4.342193628794542	0	NA	NA	NA	NA	NA	NA	NA	NA	NA
I	I:9858661	9858661	C	T	0.0636943	-0.0611503	0.379051	0.871838	0.0595642057121724	Mean number of eggs in utero	4.342193628794542	0	NA	NA	NA	NA	NA	NA	NA	NA	NA
I	I:9867243	9867243	A	G	0.111465	-0.199861	0.127895	0.118125	0.9276581784826806	Mean number of eggs in utero	4.342193628794542	0	NA	NA	NA	NA	NA	NA	NA	NA	NA
I	I:9867417	9867417	T	G	0.0955414	-0.0674073	0.125593	0.591468	0.22806874689295362	Mean number of eggs in utero	4.342193628794542	0	NA	NA	NA	NA	NA	NA	NA	NA	NA
I	I:9867828	9867828	G	A	0.133758	-0.0977599	0.131181	0.456133	0.3409085065806806	Mean number of eggs in utero	4.342193628794542	0	NA	NA	NA	NA	NA	NA	NA	NA	NA
I	I:9869634	9869634	A	T	0.0732484	-0.0933659	0.13278	0.481956	0.3169926087102166	Mean number of eggs in utero	4.342193628794542	0	NA	NA	NA	NA	NA	NA	NA	NA	NA
I	I:9875633	9875633	C	T	0.0509554	-0.116171	0.149685	0.437691	0.35883238345433527	Mean number of eggs in utero	4.342193628794542	0	NA	NA	NA	NA	NA	NA	NA	NA	NA
I	I:9895234	9895234	A	G	0.0764331	-0.116	0.129164	0.36914	0.43280889211661755	Mean number of eggs in utero	4.342193628794542	0	NA	NA	NA	NA	NA	NA	NA	NA	NA
I	I:9895931	9895931	A	T	0.133758	-0.0977599	0.131181	0.456133	0.3409085065806806	Mean number of eggs in utero	4.342193628794542	0	NA	NA	NA	NA	NA	NA	NA	NA	NA
I	I:9899934	9899934	G	A	0.0509554	-0.116171	0.149685	0.437691	0.35883238345433527	Mean number of eggs in utero	4.342193628794542	0	NA	NA	NA	NA	NA	NA	NA	NA	NA
I	I:9900973	9900973	T	A	0.0636943	-0.175085	0.343239	0.609984	0.21468155646930298	Mean number of eggs in utero	4.342193628794542	0	NA	NA	NA	NA	NA	NA	NA	NA	NA
I	I:9915074	9915074	T	C	0.0573248	0.194121	0.129331	0.133364	0.8749613871461903	Mean number of eggs in utero	4.342193628794542	0	NA	NA	NA	NA	NA	NA	NA	NA	NA
I	I:9937497	9937497	T	G	0.133758	-0.0977599	0.131181	0.456133	0.3409085065806806	Mean number of eggs in utero	4.342193628794542	0	NA	NA	NA	NA	NA	NA	NA	NA	NA
I	I:9954813	9954813	C	T	0.0700637	-0.0791085	0.137327	0.564575	0.24827835679914542	Mean number of eggs in utero	4.342193628794542	0	NA	NA	NA	NA	NA	NA	NA	NA	NA
I	I:9968890	9968890	G	A	0.0636943	-0.175085	0.343239	0.609984	0.21468155646930298	Mean number of eggs in utero	4.342193628794542	0	NA	NA	NA	NA	NA	NA	NA	NA	NA
I	I:10007812	10007812	C	T	0.133758	-0.0977599	0.131181	0.456133	0.3409085065806806	Mean number of eggs in utero	4.342193628794542	0	NA	NA	NA	NA	NA	NA	NA	NA	NA
I	I:10010865	10010865	A	G	0.089172	-0.242092	0.140077	0.0839373	1.0760450047928667	Mean number of eggs in utero	4.342193628794542	0	NA	NA	NA	NA	NA	NA	NA	NA	NA
I	I:10038942	10038942	T	G	0.127389	-0.1554	0.1156	0.178855	0.7474989143796646	Mean number of eggs in utero	4.342193628794542	0	NA	NA	NA	NA	NA	NA	NA	NA	NA
I	I:10057643	10057643	A	G	0.124204	0.131488	0.100093	0.188962	0.7236255230732406	Mean number of eggs in utero	4.342193628794542	0	NA	NA	NA	NA	NA	NA	NA	NA	NA
I	I:10063567	10063567	A	T	0.0796178	-0.0526421	0.15215	0.729352	0.13706282180243712	Mean number of eggs in utero	4.342193628794542	0	NA	NA	NA	NA	NA	NA	NA	NA	NA
I	I:10065008	10065008	C	T	0.0764331	0.00491969	0.222372	0.982349	0.0077341926132449695	Mean number of eggs in utero	4.342193628794542	0	NA	NA	NA	NA	NA	NA	NA	NA	NA
I	I:10073478	10073478	A	G	0.0509554	-0.0925828	0.241884	0.701901	0.1537241388469797	Mean number of eggs in utero	4.342193628794542	0	NA	NA	NA	NA	NA	NA	NA	NA	NA
I	I:10114500	10114500	T	C	0.0636943	-0.186464	0.37056	0.614828	0.2112463624335269	Mean number of eggs in utero	4.342193628794542	0	NA	NA	NA	NA	NA	NA	NA	NA	NA
I	I:10116329	10116329	A	G	0.401274	-0.0060781	0.073233	0.933854	0.02972101665070677	Mean number of eggs in utero	4.342193628794542	0	NA	NA	NA	NA	NA	NA	NA	NA	NA
I	I:10124799	10124799	A	T	0.0700637	-0.0786498	0.139514	0.572929	0.24189919447019834	Mean number of eggs in utero	4.342193628794542	0	NA	NA	NA	NA	NA	NA	NA	NA	NA
I	I:10133975	10133975	C	T	0.464968	0.0252384	0.0716458	0.724638	0.1398788953117065	Mean number of eggs in utero	4.342193628794542	0	NA	NA	NA	NA	NA	NA	NA	NA	NA
I	I:10148482	10148482	A	C	0.0509554	0.0216519	0.145721	0.881882	0.054589521645097325	Mean number of eggs in utero	4.342193628794542	0	NA	NA	NA	NA	NA	NA	NA	NA	NA
I	I:10171157	10171157	G	A	0.0796178	0.120659	0.224914	0.591636	0.2279454078230998	Mean number of eggs in utero	4.342193628794542	0	NA	NA	NA	NA	NA	NA	NA	NA	NA
I	I:10174743	10174743	C	T	0.213376	0.0610186	0.0883651	0.489862	0.3099262487053262	Mean number of eggs in utero	4.342193628794542	0	NA	NA	NA	NA	NA	NA	NA	NA	NA
I	I:10183258	10183258	T	G	0.0509554	-0.170359	0.168524	0.312069	0.5057493707054149	Mean number of eggs in utero	4.342193628794542	0	NA	NA	NA	NA	NA	NA	NA	NA	NA
I	I:10191365	10191365	G	A	0.117834	-0.181827	0.123094	0.139638	0.8549963801040924	Mean number of eggs in utero	4.342193628794542	0	NA	NA	NA	NA	NA	NA	NA	NA	NA
I	I:10196935	10196935	G	A	0.0636943	0.136158	0.402626	0.735231	0.13357618980868635	Mean number of eggs in utero	4.342193628794542	0	NA	NA	NA	NA	NA	NA	NA	NA	NA
I	I:10200222	10200222	T	C	0.0796178	-0.040852	0.215544	0.849677	0.07074613755283789	Mean number of eggs in utero	4.342193628794542	0	NA	NA	NA	NA	NA	NA	NA	NA	NA
I	I:10226274	10226274	T	C	0.464968	0.0252384	0.0716458	0.724638	0.1398788953117065	Mean number of eggs in utero	4.342193628794542	0	NA	NA	NA	NA	NA	NA	NA	NA	NA
I	I:10258779	10258779	C	T	0.089172	-0.242092	0.140077	0.0839373	1.0760450047928667	Mean number of eggs in utero	4.342193628794542	0	NA	NA	NA	NA	NA	NA	NA	NA	NA
I	I:10263694	10263694	T	A	0.429936	0.00647005	0.0706483	0.927031	0.03290574276614759	Mean number of eggs in utero	4.342193628794542	0	NA	NA	NA	NA	NA	NA	NA	NA	NA
I	I:10322841	10322841	G	A	0.0509554	-0.170359	0.168524	0.312069	0.5057493707054149	Mean number of eggs in utero	4.342193628794542	0	NA	NA	NA	NA	NA	NA	NA	NA	NA
I	I:10351310	10351310	C	T	0.0764331	-0.0430263	0.226459	0.849312	0.07093273968897111	Mean number of eggs in utero	4.342193628794542	0	NA	NA	NA	NA	NA	NA	NA	NA	NA
I	I:10371404	10371404	C	T	0.0636943	-0.0757102	0.288225	0.792799	0.10083690632141351	Mean number of eggs in utero	4.342193628794542	0	NA	NA	NA	NA	NA	NA	NA	NA	NA
I	I:10374980	10374980	G	A	0.111465	-0.199861	0.127895	0.118125	0.9276581784826806	Mean number of eggs in utero	4.342193628794542	0	NA	NA	NA	NA	NA	NA	NA	NA	NA
I	I:10381191	10381191	G	T	0.0636943	-0.0611503	0.379051	0.871838	0.0595642057121724	Mean number of eggs in utero	4.342193628794542	0	NA	NA	NA	NA	NA	NA	NA	NA	NA
I	I:10400085	10400085	A	T	0.0509554	-0.170359	0.168524	0.312069	0.5057493707054149	Mean number of eggs in utero	4.342193628794542	0	NA	NA	NA	NA	NA	NA	NA	NA	NA
I	I:10438869	10438869	T	C	0.0923567	0.145551	0.171042	0.394787	0.4036371567147106	Mean number of eggs in utero	4.342193628794542	0	NA	NA	NA	NA	NA	NA	NA	NA	NA
I	I:10439544	10439544	A	G	0.0828025	-0.0944828	0.141042	0.502928	0.2984941848066282	Mean number of eggs in utero	4.342193628794542	0	NA	NA	NA	NA	NA	NA	NA	NA	NA
I	I:10459235	10459235	T	C	0.0509554	-0.0147923	0.184976	0.936262	0.028602602936925934	Mean number of eggs in utero	4.342193628794542	0	NA	NA	NA	NA	NA	NA	NA	NA	NA
I	I:10465402	10465402	T	C	0.11465	0.118439	0.138026	0.390843	0.4079976618534589	Mean number of eggs in utero	4.342193628794542	0	NA	NA	NA	NA	NA	NA	NA	NA	NA
I	I:10524009	10524009	G	A	0.0732484	0.305898	0.22894	0.1815	0.7411233706278687	Mean number of eggs in utero	4.342193628794542	0	NA	NA	NA	NA	NA	NA	NA	NA	NA
I	I:10558540	10558540	A	C	0.0509554	0.0216519	0.145721	0.881882	0.054589521645097325	Mean number of eggs in utero	4.342193628794542	0	NA	NA	NA	NA	NA	NA	NA	NA	NA
I	I:10573781	10573781	T	A	0.0764331	0.249639	0.214489	0.244473	0.6117690980884354	Mean number of eggs in utero	4.342193628794542	0	NA	NA	NA	NA	NA	NA	NA	NA	NA
I	I:10641361	10641361	A	G	0.066879	0.699906	0.304655	0.0215973	1.6656005390525155	Mean number of eggs in utero	4.342193628794542	0	NA	NA	NA	NA	NA	NA	NA	NA	NA
I	I:10644317	10644317	C	T	0.0509554	0.0314956	0.144508	0.827468	0.08224879234636975	Mean number of eggs in utero	4.342193628794542	0	NA	NA	NA	NA	NA	NA	NA	NA	NA
I	I:10645295	10645295	A	T	0.0509554	-0.172539	0.185949	0.353469	0.4516486687674908	Mean number of eggs in utero	4.342193628794542	0	NA	NA	NA	NA	NA	NA	NA	NA	NA
I	I:10647199	10647199	T	C	0.11465	-0.19673	0.127297	0.12224	0.9127866587683853	Mean number of eggs in utero	4.342193628794542	0	NA	NA	NA	NA	NA	NA	NA	NA	NA
I	I:10657672	10657672	T	C	0.089172	0.234893	0.179911	0.191686	0.7174096051437189	Mean number of eggs in utero	4.342193628794542	0	NA	NA	NA	NA	NA	NA	NA	NA	NA
I	I:10672421	10672421	C	A	0.461783	-0.0424286	0.068954	0.538345	0.2689393161998102	Mean number of eggs in utero	4.342193628794542	0	NA	NA	NA	NA	NA	NA	NA	NA	NA
I	I:10672652	10672652	C	T	0.136943	0.112812	0.120094	0.347546	0.4589877055370921	Mean number of eggs in utero	4.342193628794542	0	NA	NA	NA	NA	NA	NA	NA	NA	NA
I	I:10685372	10685372	C	T	0.0636943	-0.00682626	0.134572	0.959544	0.01793510584870214	Mean number of eggs in utero	4.342193628794542	0	NA	NA	NA	NA	NA	NA	NA	NA	NA
I	I:10693877	10693877	T	C	0.0828025	-0.100055	0.117665	0.395138	0.40325120267304687	Mean number of eggs in utero	4.342193628794542	0	NA	NA	NA	NA	NA	NA	NA	NA	NA
I	I:10724577	10724577	A	C	0.0828025	-0.0944828	0.141042	0.502928	0.2984941848066282	Mean number of eggs in utero	4.342193628794542	0	NA	NA	NA	NA	NA	NA	NA	NA	NA
I	I:10726633	10726633	T	C	0.0828025	0.388649	0.204239	0.0570523	1.243726842793991	Mean number of eggs in utero	4.342193628794542	0	NA	NA	NA	NA	NA	NA	NA	NA	NA
I	I:10729471	10729471	C	T	0.0605096	-0.110908	0.172183	0.519493	0.2844203000449273	Mean number of eggs in utero	4.342193628794542	0	NA	NA	NA	NA	NA	NA	NA	NA	NA
I	I:10732655	10732655	A	G	0.111465	0.00536856	0.10166	0.957884	0.018687080911206903	Mean number of eggs in utero	4.342193628794542	0	NA	NA	NA	NA	NA	NA	NA	NA	NA
I	I:10774801	10774801	T	A	0.117834	-0.152646	0.124404	0.219813	0.6579466264652535	Mean number of eggs in utero	4.342193628794542	0	NA	NA	NA	NA	NA	NA	NA	NA	NA
I	I:10780254	10780254	A	C	0.159236	-0.0890394	0.0999444	0.372988	0.4283051403565035	Mean number of eggs in utero	4.342193628794542	0	NA	NA	NA	NA	NA	NA	NA	NA	NA
I	I:10784820	10784820	G	A	0.0923567	0.110533	0.171486	0.519215	0.28465276936036893	Mean number of eggs in utero	4.342193628794542	0	NA	NA	NA	NA	NA	NA	NA	NA	NA
I	I:10789720	10789720	T	C	0.410828	0.0135572	0.0727949	0.852258	0.06942891343195645	Mean number of eggs in utero	4.342193628794542	0	NA	NA	NA	NA	NA	NA	NA	NA	NA
I	I:10791757	10791757	A	T	0.0923567	-0.235224	0.138514	0.0894713	1.0483162523993526	Mean number of eggs in utero	4.342193628794542	0	NA	NA	NA	NA	NA	NA	NA	NA	NA
I	I:10813626	10813626	G	T	0.0732484	0.238076	0.236224	0.313531	0.503719512366465	Mean number of eggs in utero	4.342193628794542	0	NA	NA	NA	NA	NA	NA	NA	NA	NA
I	I:10831316	10831316	G	A	0.0828025	0.22461	0.17796	0.206897	0.6842458065449544	Mean number of eggs in utero	4.342193628794542	0	NA	NA	NA	NA	NA	NA	NA	NA	NA
I	I:10833260	10833260	G	A	0.0509554	-0.17308	0.199361	0.3853	0.4142009909869991	Mean number of eggs in utero	4.342193628794542	0	NA	NA	NA	NA	NA	NA	NA	NA	NA
I	I:10839219	10839219	C	A	0.111465	0.064552	0.142221	0.649911	0.18714611236533002	Mean number of eggs in utero	4.342193628794542	0	NA	NA	NA	NA	NA	NA	NA	NA	NA
I	I:10844984	10844984	T	A	0.117834	-0.152646	0.124404	0.219813	0.6579466264652535	Mean number of eggs in utero	4.342193628794542	0	NA	NA	NA	NA	NA	NA	NA	NA	NA
I	I:10858992	10858992	A	G	0.0732484	-0.0159748	0.131088	0.903008	0.04430840213337676	Mean number of eggs in utero	4.342193628794542	0	NA	NA	NA	NA	NA	NA	NA	NA	NA
I	I:10859000	10859000	A	G	0.105096	-0.0433016	0.11806	0.713787	0.14643136599044157	Mean number of eggs in utero	4.342193628794542	0	NA	NA	NA	NA	NA	NA	NA	NA	NA
I	I:10860987	10860987	A	C	0.140127	-0.0284246	0.124079	0.818804	0.08682004440024471	Mean number of eggs in utero	4.342193628794542	0	NA	NA	NA	NA	NA	NA	NA	NA	NA
I	I:10899314	10899314	C	A	0.0700637	0.501357	0.266675	0.060104200000000003	1.2210951790273454	Mean number of eggs in utero	4.342193628794542	0	NA	NA	NA	NA	NA	NA	NA	NA	NA
I	I:10902748	10902748	A	T	0.11465	-0.132041	0.125322	0.292062	0.534524945128044	Mean number of eggs in utero	4.342193628794542	0	NA	NA	NA	NA	NA	NA	NA	NA	NA
I	I:10903558	10903558	G	T	0.127389	0.0517543	0.131864	0.694701	0.15820207597209737	Mean number of eggs in utero	4.342193628794542	0	NA	NA	NA	NA	NA	NA	NA	NA	NA
I	I:10912970	10912970	T	C	0.0509554	-0.138141	0.280045	0.621814	0.20633950414181404	Mean number of eggs in utero	4.342193628794542	0	NA	NA	NA	NA	NA	NA	NA	NA	NA
I	I:10918032	10918032	C	G	0.0541401	-0.106129	0.14633	0.468282	0.3294925354720617	Mean number of eggs in utero	4.342193628794542	0	NA	NA	NA	NA	NA	NA	NA	NA	NA
I	I:10929880	10929880	A	T	0.0700637	-0.142579	0.265841	0.591728	0.22787787983946065	Mean number of eggs in utero	4.342193628794542	0	NA	NA	NA	NA	NA	NA	NA	NA	NA
I	I:10990769	10990769	G	A	0.0764331	-0.102082	0.12272	0.405506	0.39200271544144805	Mean number of eggs in utero	4.342193628794542	0	NA	NA	NA	NA	NA	NA	NA	NA	NA
I	I:11011381	11011381	G	T	0.136943	-0.0991467	0.111791	0.375135	0.42581241439432604	Mean number of eggs in utero	4.342193628794542	0	NA	NA	NA	NA	NA	NA	NA	NA	NA
I	I:11018954	11018954	G	A	0.140127	-0.00328514	0.118694	0.977919	0.00969711587688342	Mean number of eggs in utero	4.342193628794542	0	NA	NA	NA	NA	NA	NA	NA	NA	NA
I	I:11030910	11030910	T	A	0.0509554	-0.0641826	0.147308	0.663052	0.17845241061862785	Mean number of eggs in utero	4.342193628794542	0	NA	NA	NA	NA	NA	NA	NA	NA	NA
I	I:11050833	11050833	G	A	0.0636943	0.00322281	0.129658	0.98017	0.008698594043182505	Mean number of eggs in utero	4.342193628794542	0	NA	NA	NA	NA	NA	NA	NA	NA	NA
I	I:11077447	11077447	T	C	0.184713	-0.0224823	0.10333	0.827758	0.08209661324691069	Mean number of eggs in utero	4.342193628794542	0	NA	NA	NA	NA	NA	NA	NA	NA	NA
I	I:11078646	11078646	T	A	0.0509554	-0.0676402	0.143671	0.637785	0.19532569910032505	Mean number of eggs in utero	4.342193628794542	0	NA	NA	NA	NA	NA	NA	NA	NA	NA
I	I:11083248	11083248	A	G	0.0509554	0.14965	0.24711	0.54478	0.2637788446508413	Mean number of eggs in utero	4.342193628794542	0	NA	NA	NA	NA	NA	NA	NA	NA	NA
I	I:11115753	11115753	T	C	0.343949	-0.0585722	0.0866478	0.499053	0.30185332935607007	Mean number of eggs in utero	4.342193628794542	0	NA	NA	NA	NA	NA	NA	NA	NA	NA
I	I:11122708	11122708	C	T	0.130573	-0.0268173	0.124623	0.829621	0.08112026328645701	Mean number of eggs in utero	4.342193628794542	0	NA	NA	NA	NA	NA	NA	NA	NA	NA
I	I:11125799	11125799	A	T	0.124204	-0.00213994	0.137344	0.987569	0.005432551121881365	Mean number of eggs in utero	4.342193628794542	0	NA	NA	NA	NA	NA	NA	NA	NA	NA
I	I:11129375	11129375	C	T	0.156051	-0.0177371	0.117654	0.880168	0.055434424998306656	Mean number of eggs in utero	4.342193628794542	0	NA	NA	NA	NA	NA	NA	NA	NA	NA
I	I:11131309	11131309	T	A	0.0509554	-0.16665	0.150775	0.269033	0.570194445503571	Mean number of eggs in utero	4.342193628794542	0	NA	NA	NA	NA	NA	NA	NA	NA	NA
I	I:11132481	11132481	C	T	0.0509554	-0.084773	0.216049	0.694778	0.15815394185111997	Mean number of eggs in utero	4.342193628794542	0	NA	NA	NA	NA	NA	NA	NA	NA	NA
I	I:11138410	11138410	T	A	0.296178	0.0509333	0.0774417	0.510732	0.2918069304976241	Mean number of eggs in utero	4.342193628794542	0	NA	NA	NA	NA	NA	NA	NA	NA	NA
I	I:11140386	11140386	C	T	0.133758	-0.0964982	0.113046	0.393318	0.40525617786741036	Mean number of eggs in utero	4.342193628794542	0	NA	NA	NA	NA	NA	NA	NA	NA	NA
I	I:11149830	11149830	A	G	0.0796178	-0.196951	0.150022	0.189245	0.7229755860740997	Mean number of eggs in utero	4.342193628794542	0	NA	NA	NA	NA	NA	NA	NA	NA	NA
I	I:11151559	11151559	T	G	0.101911	-0.194975	0.158833	0.219617	0.6583340452764311	Mean number of eggs in utero	4.342193628794542	0	NA	NA	NA	NA	NA	NA	NA	NA	NA
I	I:11152775	11152775	A	G	0.0700637	-0.147487	0.152975	0.334984	0.47497593588152826	Mean number of eggs in utero	4.342193628794542	0	NA	NA	NA	NA	NA	NA	NA	NA	NA
I	I:11153380	11153380	C	G	0.219745	-0.162984	0.101667	0.10891	0.9629322419574422	Mean number of eggs in utero	4.342193628794542	0	NA	NA	NA	NA	NA	NA	NA	NA	NA
I	I:11154147	11154147	T	C	0.152866	-0.0263039	0.108617	0.808647	0.09224102030205793	Mean number of eggs in utero	4.342193628794542	0	NA	NA	NA	NA	NA	NA	NA	NA	NA
I	I:11156249	11156249	T	C	0.156051	-0.165176	0.105317	0.116794	0.9325794674447038	Mean number of eggs in utero	4.342193628794542	0	NA	NA	NA	NA	NA	NA	NA	NA	NA
I	I:11172569	11172569	T	A	0.0859873	0.367853	0.181217	0.0423664	1.3729784377351189	Mean number of eggs in utero	4.342193628794542	0	NA	NA	NA	NA	NA	NA	NA	NA	NA
I	I:11173306	11173306	G	A	0.0509554	-0.130966	0.147976	0.376132	0.42465971674449277	Mean number of eggs in utero	4.342193628794542	0	NA	NA	NA	NA	NA	NA	NA	NA	NA
I	I:11180632	11180632	C	T	0.257962	-0.0437901	0.0904698	0.628364	0.2017887043596357	Mean number of eggs in utero	4.342193628794542	0	NA	NA	NA	NA	NA	NA	NA	NA	NA
I	I:11185024	11185024	A	T	0.146497	-0.0628372	0.107579	0.559153	0.25246934065738796	Mean number of eggs in utero	4.342193628794542	0	NA	NA	NA	NA	NA	NA	NA	NA	NA
I	I:11200928	11200928	G	A	0.484076	-0.0397144	0.0720901	0.581703	0.235298696421529	Mean number of eggs in utero	4.342193628794542	0	NA	NA	NA	NA	NA	NA	NA	NA	NA
I	I:11202465	11202465	G	C	0.0700637	0.163233	0.150204	0.277151	0.5572835500727886	Mean number of eggs in utero	4.342193628794542	0	NA	NA	NA	NA	NA	NA	NA	NA	NA
I	I:11205114	11205114	A	G	0.292994	0.0467444	0.0773877	0.545825	0.2629465765565618	Mean number of eggs in utero	4.342193628794542	0	NA	NA	NA	NA	NA	NA	NA	NA	NA
I	I:11208510	11208510	G	A	0.0859873	0.0586446	0.179999	0.744572	0.1280932996703212	Mean number of eggs in utero	4.342193628794542	0	NA	NA	NA	NA	NA	NA	NA	NA	NA
I	I:11214134	11214134	A	T	0.117834	0.0708329	0.130904	0.588436	0.23030076537502564	Mean number of eggs in utero	4.342193628794542	0	NA	NA	NA	NA	NA	NA	NA	NA	NA
I	I:11223670	11223670	A	C	0.16879	-0.0763552	0.0973962	0.433061	0.3634509255923407	Mean number of eggs in utero	4.342193628794542	0	NA	NA	NA	NA	NA	NA	NA	NA	NA
I	I:11235630	11235630	T	C	0.101911	0.124013	0.161944	0.443808	0.35280487352234985	Mean number of eggs in utero	4.342193628794542	0	NA	NA	NA	NA	NA	NA	NA	NA	NA
I	I:11258815	11258815	T	C	0.0541401	0.0176204	0.140599	0.900267	0.04562866897196813	Mean number of eggs in utero	4.342193628794542	0	NA	NA	NA	NA	NA	NA	NA	NA	NA
I	I:11273155	11273155	T	C	0.066879	0.609132	0.293107	0.0376919	1.4237519697746546	Mean number of eggs in utero	4.342193628794542	0	NA	NA	NA	NA	NA	NA	NA	NA	NA
I	I:11273266	11273266	C	T	0.0541401	0.377475	0.225088	0.0935401	1.0290021701403116	Mean number of eggs in utero	4.342193628794542	0	NA	NA	NA	NA	NA	NA	NA	NA	NA
I	I:11293341	11293341	A	G	0.0605096	-0.0222203	0.1491	0.88153	0.05476290331615362	Mean number of eggs in utero	4.342193628794542	0	NA	NA	NA	NA	NA	NA	NA	NA	NA
I	I:11293639	11293639	T	G	0.404459	-0.0651478	0.0739333	0.378225	0.42224976844916656	Mean number of eggs in utero	4.342193628794542	0	NA	NA	NA	NA	NA	NA	NA	NA	NA
I	I:11295338	11295338	C	T	0.089172	-0.213511	0.140578	0.128811	0.890047048192701	Mean number of eggs in utero	4.342193628794542	0	NA	NA	NA	NA	NA	NA	NA	NA	NA
I	I:11329591	11329591	G	A	0.245223	-0.0904465	0.0904291	0.317217	0.4986435464226645	Mean number of eggs in utero	4.342193628794542	0	NA	NA	NA	NA	NA	NA	NA	NA	NA
I	I:11332514	11332514	T	G	0.0764331	-0.0542807	0.13426	0.685995	0.1636790497164598	Mean number of eggs in utero	4.342193628794542	0	NA	NA	NA	NA	NA	NA	NA	NA	NA
I	I:11334549	11334549	G	C	0.16242	-0.0679981	0.099447	0.494125	0.30616317264897297	Mean number of eggs in utero	4.342193628794542	0	NA	NA	NA	NA	NA	NA	NA	NA	NA
I	I:11345969	11345969	A	G	0.181529	0.0775427	0.107702	0.47154	0.32648146084299456	Mean number of eggs in utero	4.342193628794542	0	NA	NA	NA	NA	NA	NA	NA	NA	NA
I	I:11346097	11346097	A	C	0.11465	-0.00508262	0.111983	0.963799	0.01601352864147897	Mean number of eggs in utero	4.342193628794542	0	NA	NA	NA	NA	NA	NA	NA	NA	NA
I	I:11351920	11351920	T	C	0.149682	0.0284872	0.11945	0.811504	0.09070933514317603	Mean number of eggs in utero	4.342193628794542	0	NA	NA	NA	NA	NA	NA	NA	NA	NA
I	I:11353512	11353512	G	A	0.130573	-0.0900872	0.109358	0.410065	0.3871472971732295	Mean number of eggs in utero	4.342193628794542	0	NA	NA	NA	NA	NA	NA	NA	NA	NA
I	I:11381034	11381034	A	G	0.394904	-0.0266385	0.0763799	0.727268	0.13830552108958832	Mean number of eggs in utero	4.342193628794542	0	NA	NA	NA	NA	NA	NA	NA	NA	NA
I	I:11381518	11381518	G	A	0.0859873	-0.105217	0.136135	0.439591	0.3569512077188584	Mean number of eggs in utero	4.342193628794542	0	NA	NA	NA	NA	NA	NA	NA	NA	NA
I	I:11381744	11381744	C	G	0.136943	-0.134247	0.11252	0.232834	0.6329536007652093	Mean number of eggs in utero	4.342193628794542	0	NA	NA	NA	NA	NA	NA	NA	NA	NA
I	I:11381920	11381920	G	A	0.0828025	0.183719	0.114969	0.110046	0.9584257387489711	Mean number of eggs in utero	4.342193628794542	0	NA	NA	NA	NA	NA	NA	NA	NA	NA
I	I:11383522	11383522	G	T	0.305732	0.0837499	0.0756491	0.268258	0.571447317622781	Mean number of eggs in utero	4.342193628794542	0	NA	NA	NA	NA	NA	NA	NA	NA	NA
I	I:11396184	11396184	T	C	0.328025	-0.0478252	0.0900963	0.595541	0.225088334163043	Mean number of eggs in utero	4.342193628794542	0	NA	NA	NA	NA	NA	NA	NA	NA	NA
I	I:11401270	11401270	G	A	0.111465	0.105906	0.160951	0.510539	0.2919710766175181	Mean number of eggs in utero	4.342193628794542	0	NA	NA	NA	NA	NA	NA	NA	NA	NA
I	I:11410058	11410058	C	A	0.0764331	0.302276	0.191777	0.114984	0.9393625874302486	Mean number of eggs in utero	4.342193628794542	0	NA	NA	NA	NA	NA	NA	NA	NA	NA
I	I:11417368	11417368	G	A	0.11465	0.0204681	0.111794	0.854729	0.0681715606643386	Mean number of eggs in utero	4.342193628794542	0	NA	NA	NA	NA	NA	NA	NA	NA	NA
I	I:11421979	11421979	T	C	0.0732484	0.250589	0.205363	0.222379	0.6529062270483044	Mean number of eggs in utero	4.342193628794542	0	NA	NA	NA	NA	NA	NA	NA	NA	NA
I	I:11422128	11422128	C	T	0.140127	-0.0296236	0.113968	0.794918	0.09967766880798717	Mean number of eggs in utero	4.342193628794542	0	NA	NA	NA	NA	NA	NA	NA	NA	NA
I	I:11422317	11422317	A	C	0.089172	0.0647464	0.15772	0.681428	0.1665800251625404	Mean number of eggs in utero	4.342193628794542	0	NA	NA	NA	NA	NA	NA	NA	NA	NA
I	I:11458881	11458881	C	T	0.066879	0.276955	0.207007	0.180929	0.7424918171613556	Mean number of eggs in utero	4.342193628794542	0	NA	NA	NA	NA	NA	NA	NA	NA	NA
I	I:11462393	11462393	A	T	0.0636943	-0.0942147	0.131899	0.475046	0.3232643344195625	Mean number of eggs in utero	4.342193628794542	0	NA	NA	NA	NA	NA	NA	NA	NA	NA
I	I:11466719	11466719	G	A	0.461783	-0.0483462	0.0694426	0.486301	0.31309483737396665	Mean number of eggs in utero	4.342193628794542	0	NA	NA	NA	NA	NA	NA	NA	NA	NA
I	I:11474790	11474790	G	A	0.496815	0.0194919	0.068564	0.77619	0.11003195676837561	Mean number of eggs in utero	4.342193628794542	0	NA	NA	NA	NA	NA	NA	NA	NA	NA
I	I:11474945	11474945	G	A	0.426752	0.0170837	0.0703794	0.808209	0.09247631767885184	Mean number of eggs in utero	4.342193628794542	0	NA	NA	NA	NA	NA	NA	NA	NA	NA
I	I:11475178	11475178	A	T	0.382166	-0.0319349	0.0756869	0.673073	0.1719378306083093	Mean number of eggs in utero	4.342193628794542	0	NA	NA	NA	NA	NA	NA	NA	NA	NA
I	I:11475290	11475290	C	T	0.0541401	0.331181	0.224356	0.139907	0.8541605558060994	Mean number of eggs in utero	4.342193628794542	0	NA	NA	NA	NA	NA	NA	NA	NA	NA
I	I:11484361	11484361	C	G	0.0541401	-0.0598109	0.165926	0.718498	0.1435744364235241	Mean number of eggs in utero	4.342193628794542	0	NA	NA	NA	NA	NA	NA	NA	NA	NA
I	I:11490593	11490593	G	T	0.315287	0.0747803	0.0737486	0.310588	0.5078153278555575	Mean number of eggs in utero	4.342193628794542	0	NA	NA	NA	NA	NA	NA	NA	NA	NA
I	I:11492030	11492030	T	C	0.398089	0.0780579	0.0681137	0.251798	0.5989477237611718	Mean number of eggs in utero	4.342193628794542	0	NA	NA	NA	NA	NA	NA	NA	NA	NA
I	I:11494140	11494140	G	C	0.496815	-0.0844708	0.0735604	0.250837	0.6006084020094167	Mean number of eggs in utero	4.342193628794542	0	NA	NA	NA	NA	NA	NA	NA	NA	NA
I	I:11495563	11495563	A	C	0.101911	-0.0158683	0.111282	0.886609	0.052267864475327865	Mean number of eggs in utero	4.342193628794542	0	NA	NA	NA	NA	NA	NA	NA	NA	NA
I	I:11498821	11498821	T	A	0.0605096	-0.0793149	0.133613	0.55277	0.257455535076698	Mean number of eggs in utero	4.342193628794542	0	NA	NA	NA	NA	NA	NA	NA	NA	NA
I	I:11498908	11498908	G	C	0.136943	0.076472	0.117346	0.514608	0.2885234666121681	Mean number of eggs in utero	4.342193628794542	0	NA	NA	NA	NA	NA	NA	NA	NA	NA
I	I:11499610	11499610	C	A	0.11465	-0.168935	0.129743	0.19289	0.7146902869097328	Mean number of eggs in utero	4.342193628794542	0	NA	NA	NA	NA	NA	NA	NA	NA	NA
I	I:11499902	11499902	C	A	0.0509554	0.295302	0.196982	0.133839	0.8734173169358617	Mean number of eggs in utero	4.342193628794542	0	NA	NA	NA	NA	NA	NA	NA	NA	NA
I	I:11502201	11502201	T	A	0.111465	0.134388	0.13998	0.337031	0.4723301510285043	Mean number of eggs in utero	4.342193628794542	0	NA	NA	NA	NA	NA	NA	NA	NA	NA
I	I:11503122	11503122	T	C	0.378981	-0.0428508	0.0762537	0.57415	0.24097463083913634	Mean number of eggs in utero	4.342193628794542	0	NA	NA	NA	NA	NA	NA	NA	NA	NA
I	I:11503211	11503211	T	C	0.315287	0.0747803	0.0737486	0.310588	0.5078153278555575	Mean number of eggs in utero	4.342193628794542	0	NA	NA	NA	NA	NA	NA	NA	NA	NA
I	I:11503336	11503336	G	A	0.0605096	-0.0793149	0.133613	0.55277	0.257455535076698	Mean number of eggs in utero	4.342193628794542	0	NA	NA	NA	NA	NA	NA	NA	NA	NA
I	I:11507003	11507003	G	A	0.449045	0.0745429	0.0706611	0.291455	0.5354284898254651	Mean number of eggs in utero	4.342193628794542	0	NA	NA	NA	NA	NA	NA	NA	NA	NA
I	I:11513653	11513653	A	G	0.33121	0.0403833	0.0729707	0.579977	0.23658922880110117	Mean number of eggs in utero	4.342193628794542	0	NA	NA	NA	NA	NA	NA	NA	NA	NA
I	I:11515310	11515310	C	T	0.0541401	0.297683	0.176066	0.0908842	1.0415116112690979	Mean number of eggs in utero	4.342193628794542	0	NA	NA	NA	NA	NA	NA	NA	NA	NA
I	I:11519605	11519605	T	C	0.5	0.0686199	0.0748709	0.3594	0.444421927227045	Mean number of eggs in utero	4.342193628794542	0	NA	NA	NA	NA	NA	NA	NA	NA	NA
I	I:11520659	11520659	G	A	0.0828025	0.28928	0.199316	0.14668	0.8336290987114349	Mean number of eggs in utero	4.342193628794542	0	NA	NA	NA	NA	NA	NA	NA	NA	NA
I	I:11522362	11522362	T	C	0.0509554	0.231766	0.222514	0.297609	0.5263539394190495	Mean number of eggs in utero	4.342193628794542	0	NA	NA	NA	NA	NA	NA	NA	NA	NA
I	I:11538171	11538171	G	A	0.0828025	0.297541	0.179239	0.0969091	1.013635439727103	Mean number of eggs in utero	4.342193628794542	0	NA	NA	NA	NA	NA	NA	NA	NA	NA
I	I:11541682	11541682	G	T	0.121019	-0.106191	0.126365	0.400711	0.39716873549659937	Mean number of eggs in utero	4.342193628794542	0	NA	NA	NA	NA	NA	NA	NA	NA	NA
I	I:11542194	11542194	G	T	0.27707	0.0539124	0.0780513	0.489735	0.31003885705245415	Mean number of eggs in utero	4.342193628794542	0	NA	NA	NA	NA	NA	NA	NA	NA	NA
I	I:11542715	11542715	T	G	0.455414	-0.0285859	0.0720941	0.69173	0.16006338876844084	Mean number of eggs in utero	4.342193628794542	0	NA	NA	NA	NA	NA	NA	NA	NA	NA
I	I:11545278	11545278	T	C	0.496815	0.0240767	0.0702586	0.731835	0.13558682422439958	Mean number of eggs in utero	4.342193628794542	0	NA	NA	NA	NA	NA	NA	NA	NA	NA
I	I:11555074	11555074	C	T	0.066879	0.216951	0.192569	0.259905	0.5851853655489212	Mean number of eggs in utero	4.342193628794542	0	NA	NA	NA	NA	NA	NA	NA	NA	NA
I	I:11555190	11555190	C	T	0.270701	-0.0420701	0.0989076	0.670584	0.17354681296298052	Mean number of eggs in utero	4.342193628794542	0	NA	NA	NA	NA	NA	NA	NA	NA	NA
I	I:11557202	11557202	A	G	0.0636943	0.0201054	0.12895	0.876099	0.057446815379441234	Mean number of eggs in utero	4.342193628794542	0	NA	NA	NA	NA	NA	NA	NA	NA	NA
I	I:11559159	11559159	G	A	0.334395	0.0449447	0.0735622	0.541217	0.2666285703703524	Mean number of eggs in utero	4.342193628794542	0	NA	NA	NA	NA	NA	NA	NA	NA	NA
I	I:11560587	11560587	T	A	0.089172	0.00904154	0.157439	0.954204	0.020358767221353307	Mean number of eggs in utero	4.342193628794542	0	NA	NA	NA	NA	NA	NA	NA	NA	NA
I	I:11564762	11564762	G	A	0.493631	0.0567281	0.0744353	0.445993	0.35067195762245584	Mean number of eggs in utero	4.342193628794542	0	NA	NA	NA	NA	NA	NA	NA	NA	NA
I	I:11569952	11569952	A	C	0.39172	0.0083304	0.073098	0.909268	0.04130809283217539	Mean number of eggs in utero	4.342193628794542	0	NA	NA	NA	NA	NA	NA	NA	NA	NA
I	I:11571128	11571128	T	A	0.0700637	-0.170432	0.139417	0.221534	0.6545596108439926	Mean number of eggs in utero	4.342193628794542	0	NA	NA	NA	NA	NA	NA	NA	NA	NA
I	I:11571207	11571207	C	T	0.111465	-0.144396	0.128325	0.26049	0.5842089442576583	Mean number of eggs in utero	4.342193628794542	0	NA	NA	NA	NA	NA	NA	NA	NA	NA
I	I:11579548	11579548	A	G	0.105096	0.153866	0.150717	0.307304	0.5124317867445276	Mean number of eggs in utero	4.342193628794542	0	NA	NA	NA	NA	NA	NA	NA	NA	NA
I	I:11583277	11583277	A	G	0.066879	0.3497	0.191346	0.067613	1.1699697939183311	Mean number of eggs in utero	4.342193628794542	0	NA	NA	NA	NA	NA	NA	NA	NA	NA
I	I:11584346	11584346	A	G	0.39172	0.0251174	0.0777747	0.746733	0.12683465568765315	Mean number of eggs in utero	4.342193628794542	0	NA	NA	NA	NA	NA	NA	NA	NA	NA
I	I:11587295	11587295	C	T	0.0509554	0.631031	0.248529	0.0111148	1.9540983476008742	Mean number of eggs in utero	4.342193628794542	0	NA	NA	NA	NA	NA	NA	NA	NA	NA
I	I:11595005	11595005	T	A	0.0573248	-0.143476	0.137887	0.298094	0.5256467653062338	Mean number of eggs in utero	4.342193628794542	0	NA	NA	NA	NA	NA	NA	NA	NA	NA
I	I:11595583	11595583	A	G	0.302548	-0.0225861	0.0753529	0.764377	0.11669238928233439	Mean number of eggs in utero	4.342193628794542	0	NA	NA	NA	NA	NA	NA	NA	NA	NA
I	I:11597689	11597689	T	G	0.353503	0.0331352	0.0728787	0.649353	0.18751914869328418	Mean number of eggs in utero	4.342193628794542	0	NA	NA	NA	NA	NA	NA	NA	NA	NA
I	I:11598685	11598685	A	G	0.0923567	-0.143247	0.119598	0.231021	0.6363485405858156	Mean number of eggs in utero	4.342193628794542	0	NA	NA	NA	NA	NA	NA	NA	NA	NA
I	I:11601879	11601879	C	T	0.191083	-0.0509936	0.108148	0.63727	0.195676525802456	Mean number of eggs in utero	4.342193628794542	0	NA	NA	NA	NA	NA	NA	NA	NA	NA
I	I:11602517	11602517	T	C	0.136943	-0.0787807	0.118573	0.50643	0.29548057540668243	Mean number of eggs in utero	4.342193628794542	0	NA	NA	NA	NA	NA	NA	NA	NA	NA
I	I:11604686	11604686	C	A	0.487261	0.0130936	0.0749405	0.861299	0.06484605701549764	Mean number of eggs in utero	4.342193628794542	0	NA	NA	NA	NA	NA	NA	NA	NA	NA
I	I:11611526	11611526	A	C	0.11465	0.0595542	0.129129	0.644655	0.19067264456130928	Mean number of eggs in utero	4.342193628794542	0	NA	NA	NA	NA	NA	NA	NA	NA	NA
I	I:11613439	11613439	A	G	0.417197	0.0635173	0.0732549	0.385902	0.4135229706208474	Mean number of eggs in utero	4.342193628794542	0	NA	NA	NA	NA	NA	NA	NA	NA	NA
I	I:11613981	11613981	G	A	0.343949	0.0795217	0.0724299	0.272243	0.5650432781487035	Mean number of eggs in utero	4.342193628794542	0	NA	NA	NA	NA	NA	NA	NA	NA	NA
I	I:11645308	11645308	T	A	0.11465	-0.155865	0.125669	0.21487	0.6678242161695765	Mean number of eggs in utero	4.342193628794542	0	NA	NA	NA	NA	NA	NA	NA	NA	NA
I	I:11645508	11645508	T	C	0.0541401	-0.0277438	0.155248	0.858169	0.06642717772236725	Mean number of eggs in utero	4.342193628794542	0	NA	NA	NA	NA	NA	NA	NA	NA	NA
I	I:11646369	11646369	A	T	0.066879	0.473941	0.208943	0.023312	1.632420465574085	Mean number of eggs in utero	4.342193628794542	0	NA	NA	NA	NA	NA	NA	NA	NA	NA
I	I:11647026	11647026	C	T	0.394904	0.0127845	0.077584	0.869115	0.06092275455130564	Mean number of eggs in utero	4.342193628794542	0	NA	NA	NA	NA	NA	NA	NA	NA	NA
I	I:11647030	11647030	A	T	0.111465	0.284738	0.156312	0.0685154	1.1642118024735741	Mean number of eggs in utero	4.342193628794542	0	NA	NA	NA	NA	NA	NA	NA	NA	NA
I	I:11648672	11648672	C	T	0.16879	0.0730479	0.110836	0.509856	0.2925524655412944	Mean number of eggs in utero	4.342193628794542	0	NA	NA	NA	NA	NA	NA	NA	NA	NA
I	I:11653326	11653326	A	G	0.0828025	0.0979629	0.123336	0.427033	0.3695385625297078	Mean number of eggs in utero	4.342193628794542	0	NA	NA	NA	NA	NA	NA	NA	NA	NA
I	I:11654532	11654532	A	C	0.11465	0.0751992	0.118052	0.524125	0.2805651245883754	Mean number of eggs in utero	4.342193628794542	0	NA	NA	NA	NA	NA	NA	NA	NA	NA
I	I:11659165	11659165	C	A	0.0605096	-0.0728899	0.13649	0.593321	0.22671027997416224	Mean number of eggs in utero	4.342193628794542	0	NA	NA	NA	NA	NA	NA	NA	NA	NA
I	I:11662123	11662123	T	C	0.480892	0.0529592	0.074606	0.477796	0.32075749038605555	Mean number of eggs in utero	4.342193628794542	0	NA	NA	NA	NA	NA	NA	NA	NA	NA
I	I:11666728	11666728	G	A	0.066879	0.0371168	0.173027	0.830146	0.08084552037302001	Mean number of eggs in utero	4.342193628794542	0	NA	NA	NA	NA	NA	NA	NA	NA	NA
I	I:11667872	11667872	G	A	0.267516	0.0114496	0.0790592	0.884851	0.05312985396403191	Mean number of eggs in utero	4.342193628794542	0	NA	NA	NA	NA	NA	NA	NA	NA	NA
I	I:11671479	11671479	A	C	0.372611	-0.0018739	0.0737856	0.979739	0.008889603855084603	Mean number of eggs in utero	4.342193628794542	0	NA	NA	NA	NA	NA	NA	NA	NA	NA
I	I:11672560	11672560	T	C	0.066879	-0.0978664	0.127335	0.442147	0.35443331735893735	Mean number of eggs in utero	4.342193628794542	0	NA	NA	NA	NA	NA	NA	NA	NA	NA
I	I:11681502	11681502	A	G	0.0573248	0.29324	0.161076	0.0686822	1.1631558021459818	Mean number of eggs in utero	4.342193628794542	0	NA	NA	NA	NA	NA	NA	NA	NA	NA
I	I:11681858	11681858	G	T	0.111465	-0.144396	0.128325	0.26049	0.5842089442576583	Mean number of eggs in utero	4.342193628794542	0	NA	NA	NA	NA	NA	NA	NA	NA	NA
I	I:11688536	11688536	G	A	0.477707	0.0457224	0.0742679	0.538131	0.26911198892145305	Mean number of eggs in utero	4.342193628794542	0	NA	NA	NA	NA	NA	NA	NA	NA	NA
I	I:11688867	11688867	G	A	0.165605	0.116153	0.107958	0.281967	0.5498017163491715	Mean number of eggs in utero	4.342193628794542	0	NA	NA	NA	NA	NA	NA	NA	NA	NA
I	I:11692364	11692364	C	A	0.117834	0.0580446	0.109089	0.594669	0.2257247006126248	Mean number of eggs in utero	4.342193628794542	0	NA	NA	NA	NA	NA	NA	NA	NA	NA
I	I:11695783	11695783	T	C	0.0923567	0.229513	0.162921	0.158914	0.7988378406471481	Mean number of eggs in utero	4.342193628794542	0	NA	NA	NA	NA	NA	NA	NA	NA	NA
I	I:11697447	11697447	T	A	0.0636943	-0.0753676	0.134908	0.576394	0.2392805486430133	Mean number of eggs in utero	4.342193628794542	0	NA	NA	NA	NA	NA	NA	NA	NA	NA
I	I:11697724	11697724	C	T	0.066879	0.134248	0.148025	0.364445	0.4383680036938792	Mean number of eggs in utero	4.342193628794542	0	NA	NA	NA	NA	NA	NA	NA	NA	NA
I	I:11699378	11699378	A	T	0.124204	0.043249	0.111108	0.69709	0.15671114732513317	Mean number of eggs in utero	4.342193628794542	0	NA	NA	NA	NA	NA	NA	NA	NA	NA
I	I:11701489	11701489	G	A	0.133758	0.0457466	0.133469	0.731786	0.13561590337756996	Mean number of eggs in utero	4.342193628794542	0	NA	NA	NA	NA	NA	NA	NA	NA	NA
I	I:11705602	11705602	C	A	0.0987261	0.0948704	0.160773	0.555131	0.2556045198253661	Mean number of eggs in utero	4.342193628794542	0	NA	NA	NA	NA	NA	NA	NA	NA	NA
I	I:11708251	11708251	G	T	0.0605096	0.157402	0.160517	0.326793	0.4857272547526349	Mean number of eggs in utero	4.342193628794542	0	NA	NA	NA	NA	NA	NA	NA	NA	NA
I	I:11710030	11710030	A	T	0.318471	-0.0113865	0.0743887	0.878345	0.05633486659200147	Mean number of eggs in utero	4.342193628794542	0	NA	NA	NA	NA	NA	NA	NA	NA	NA
I	I:11710782	11710782	G	A	0.33758	0.0371777	0.0748231	0.619277	0.20811504942458572	Mean number of eggs in utero	4.342193628794542	0	NA	NA	NA	NA	NA	NA	NA	NA	NA
I	I:11711911	11711911	C	T	0.401274	0.00606448	0.0783497	0.938303	0.02765689511903198	Mean number of eggs in utero	4.342193628794542	0	NA	NA	NA	NA	NA	NA	NA	NA	NA
I	I:11715584	11715584	A	G	0.111465	-0.144396	0.128325	0.26049	0.5842089442576583	Mean number of eggs in utero	4.342193628794542	0	NA	NA	NA	NA	NA	NA	NA	NA	NA
I	I:11718020	11718020	T	G	0.0573248	-0.0685888	0.163715	0.675252	0.17053412082036712	Mean number of eggs in utero	4.342193628794542	0	NA	NA	NA	NA	NA	NA	NA	NA	NA
I	I:11723374	11723374	C	T	0.471338	0.0408691	0.0749563	0.585589	0.23240708988028216	Mean number of eggs in utero	4.342193628794542	0	NA	NA	NA	NA	NA	NA	NA	NA	NA
I	I:11739919	11739919	T	A	0.0605096	-0.0903523	0.146622	0.537746	0.2694228114089119	Mean number of eggs in utero	4.342193628794542	0	NA	NA	NA	NA	NA	NA	NA	NA	NA
I	I:11740158	11740158	G	A	0.127389	0.0961102	0.135476	0.478059	0.32051850131004944	Mean number of eggs in utero	4.342193628794542	0	NA	NA	NA	NA	NA	NA	NA	NA	NA
I	I:11744404	11744404	G	C	0.0955414	0.205755	0.163855	0.209219	0.6793988780243383	Mean number of eggs in utero	4.342193628794542	0	NA	NA	NA	NA	NA	NA	NA	NA	NA
I	I:11747655	11747655	C	T	0.0764331	0.503568	0.216898	0.02025	1.6935749724493125	Mean number of eggs in utero	4.342193628794542	0	NA	NA	NA	NA	NA	NA	NA	NA	NA
I	I:11755059	11755059	C	T	0.38535	-0.0156938	0.0728596	0.829457	0.0812061233789471	Mean number of eggs in utero	4.342193628794542	0	NA	NA	NA	NA	NA	NA	NA	NA	NA
I	I:11765815	11765815	C	T	0.471338	0.0408691	0.0749563	0.585589	0.23240708988028216	Mean number of eggs in utero	4.342193628794542	0	NA	NA	NA	NA	NA	NA	NA	NA	NA
I	I:11769205	11769205	T	A	0.401274	0.00606448	0.0783497	0.938303	0.02765689511903198	Mean number of eggs in utero	4.342193628794542	0	NA	NA	NA	NA	NA	NA	NA	NA	NA
I	I:11771405	11771405	A	G	0.117834	-0.127468	0.125307	0.30904	0.5099853048632361	Mean number of eggs in utero	4.342193628794542	0	NA	NA	NA	NA	NA	NA	NA	NA	NA
I	I:11774693	11774693	T	A	0.359873	0.00713937	0.0711051	0.920022	0.03620178747578673	Mean number of eggs in utero	4.342193628794542	0	NA	NA	NA	NA	NA	NA	NA	NA	NA
I	I:11776445	11776445	A	G	0.0605096	0.171503	0.160531	0.285364	0.5446008160409093	Mean number of eggs in utero	4.342193628794542	0	NA	NA	NA	NA	NA	NA	NA	NA	NA
I	I:11778216	11778216	C	T	0.363057	7.39502e-5	0.0742453	0.999205	3.4540142837995836e-4	Mean number of eggs in utero	4.342193628794542	0	NA	NA	NA	NA	NA	NA	NA	NA	NA
I	I:11779027	11779027	G	A	0.197452	0.0451671	0.102263	0.658725	0.18129585385617092	Mean number of eggs in utero	4.342193628794542	0	NA	NA	NA	NA	NA	NA	NA	NA	NA
I	I:11780044	11780044	G	A	0.0955414	-0.0283332	0.111208	0.798895	0.09751029692777101	Mean number of eggs in utero	4.342193628794542	0	NA	NA	NA	NA	NA	NA	NA	NA	NA
I	I:11785937	11785937	C	T	0.0636943	-0.105118	0.15194	0.489036	0.3106591694533328	Mean number of eggs in utero	4.342193628794542	0	NA	NA	NA	NA	NA	NA	NA	NA	NA
I	I:11788608	11788608	A	G	0.111465	0.131604	0.145332	0.36518	0.4374930157146445	Mean number of eggs in utero	4.342193628794542	0	NA	NA	NA	NA	NA	NA	NA	NA	NA
I	I:11790316	11790316	A	C	0.089172	0.176814	0.146185	0.226462	0.645004661531241	Mean number of eggs in utero	4.342193628794542	0	NA	NA	NA	NA	NA	NA	NA	NA	NA
I	I:11794640	11794640	G	A	0.066879	0.625011	0.240249	0.00928117	2.0323972724325428	Mean number of eggs in utero	4.342193628794542	0	NA	NA	NA	NA	NA	NA	NA	NA	NA
I	I:11797045	11797045	A	T	0.117834	-0.127468	0.125307	0.30904	0.5099853048632361	Mean number of eggs in utero	4.342193628794542	0	NA	NA	NA	NA	NA	NA	NA	NA	NA
I	I:11800580	11800580	A	C	0.0636943	0.0584492	0.129785	0.652455	0.18544943636611338	Mean number of eggs in utero	4.342193628794542	0	NA	NA	NA	NA	NA	NA	NA	NA	NA
I	I:11800672	11800672	T	G	0.404459	-3.97806e-4	0.0780787	0.995935	0.0017690050125416324	Mean number of eggs in utero	4.342193628794542	0	NA	NA	NA	NA	NA	NA	NA	NA	NA
I	I:11802331	11802331	C	G	0.461783	0.0427438	0.0746196	0.566765	0.24659697701349173	Mean number of eggs in utero	4.342193628794542	0	NA	NA	NA	NA	NA	NA	NA	NA	NA
I	I:11802899	11802899	T	A	0.0700637	0.0789156	0.123627	0.523254	0.2812874430250376	Mean number of eggs in utero	4.342193628794542	0	NA	NA	NA	NA	NA	NA	NA	NA	NA
I	I:11803138	11803138	C	T	0.286624	0.00238203	0.0762675	0.975084	0.010957969773163464	Mean number of eggs in utero	4.342193628794542	0	NA	NA	NA	NA	NA	NA	NA	NA	NA
I	I:11803246	11803246	A	T	0.39172	0.0436128	0.0750487	0.561156	0.25091638915177944	Mean number of eggs in utero	4.342193628794542	0	NA	NA	NA	NA	NA	NA	NA	NA	NA
I	I:11805073	11805073	A	C	0.0796178	0.111772	0.151847	0.461679	0.3356598793833138	Mean number of eggs in utero	4.342193628794542	0	NA	NA	NA	NA	NA	NA	NA	NA	NA
I	I:11808688	11808688	G	A	0.0509554	0.209596	0.170415	0.218729	0.6600936325772689	Mean number of eggs in utero	4.342193628794542	0	NA	NA	NA	NA	NA	NA	NA	NA	NA
I	I:11809858	11809858	A	G	0.0732484	0.0395597	0.128094	0.757448	0.12064717680352043	Mean number of eggs in utero	4.342193628794542	0	NA	NA	NA	NA	NA	NA	NA	NA	NA
I	I:11814661	11814661	A	T	0.0509554	0.224154	0.151096	0.137936	0.8603223722510612	Mean number of eggs in utero	4.342193628794542	0	NA	NA	NA	NA	NA	NA	NA	NA	NA
I	I:11815690	11815690	C	G	0.0509554	0.123708	0.154165	0.422301	0.3743778901735586	Mean number of eggs in utero	4.342193628794542	0	NA	NA	NA	NA	NA	NA	NA	NA	NA
I	I:11817321	11817321	C	T	0.0923567	-0.162041	0.135038	0.230154	0.6379814728107119	Mean number of eggs in utero	4.342193628794542	0	NA	NA	NA	NA	NA	NA	NA	NA	NA
I	I:11819722	11819722	G	C	0.0605096	-0.0195991	0.143007	0.890991	0.05012668279822951	Mean number of eggs in utero	4.342193628794542	0	NA	NA	NA	NA	NA	NA	NA	NA	NA
I	I:11819736	11819736	C	G	0.136943	0.0399372	0.132761	0.763551	0.11716194972889742	Mean number of eggs in utero	4.342193628794542	0	NA	NA	NA	NA	NA	NA	NA	NA	NA
I	I:11831126	11831126	C	T	0.146497	0.0358982	0.11647	0.757916	0.12037892465553127	Mean number of eggs in utero	4.342193628794542	0	NA	NA	NA	NA	NA	NA	NA	NA	NA
I	I:11837755	11837755	T	C	0.39172	0.01335	0.0714118	0.851704	0.06971131309985042	Mean number of eggs in utero	4.342193628794542	0	NA	NA	NA	NA	NA	NA	NA	NA	NA
I	I:11839585	11839585	A	G	0.302548	0.0356287	0.0755885	0.63739	0.19559475444698496	Mean number of eggs in utero	4.342193628794542	0	NA	NA	NA	NA	NA	NA	NA	NA	NA
I	I:11844238	11844238	G	A	0.414013	-0.0131439	0.0769956	0.864453	0.06325861418361747	Mean number of eggs in utero	4.342193628794542	0	NA	NA	NA	NA	NA	NA	NA	NA	NA
I	I:11845863	11845863	C	T	0.0732484	-0.0590318	0.126161	0.639851	0.193921146971749	Mean number of eggs in utero	4.342193628794542	0	NA	NA	NA	NA	NA	NA	NA	NA	NA
I	I:11847103	11847103	G	T	0.0509554	0.0565933	0.161034	0.725261	0.1395056755510512	Mean number of eggs in utero	4.342193628794542	0	NA	NA	NA	NA	NA	NA	NA	NA	NA
I	I:11848415	11848415	A	G	0.452229	0.0415336	0.0730593	0.569701	0.24435301822262362	Mean number of eggs in utero	4.342193628794542	0	NA	NA	NA	NA	NA	NA	NA	NA	NA
I	I:11860532	11860532	T	C	0.286624	0.00725115	0.0785125	0.926415	0.03319442170333015	Mean number of eggs in utero	4.342193628794542	0	NA	NA	NA	NA	NA	NA	NA	NA	NA
I	I:11870559	11870559	A	C	0.0541401	0.100832	0.152148	0.50751	0.29455539597232194	Mean number of eggs in utero	4.342193628794542	0	NA	NA	NA	NA	NA	NA	NA	NA	NA
I	I:11873089	11873089	A	G	0.39172	0.0896869	0.0720339	0.213108	0.6714002467163876	Mean number of eggs in utero	4.342193628794542	0	NA	NA	NA	NA	NA	NA	NA	NA	NA
I	I:11886472	11886472	C	T	0.369427	0.0758682	0.0726259	0.296188	0.528432540816004	Mean number of eggs in utero	4.342193628794542	0	NA	NA	NA	NA	NA	NA	NA	NA	NA
I	I:11889903	11889903	T	C	0.0636943	0.0764241	0.129509	0.555118	0.25561469020744254	Mean number of eggs in utero	4.342193628794542	0	NA	NA	NA	NA	NA	NA	NA	NA	NA
I	I:11891849	11891849	G	C	0.066879	-0.0114895	0.132725	0.931016	0.03104285537526161	Mean number of eggs in utero	4.342193628794542	0	NA	NA	NA	NA	NA	NA	NA	NA	NA
I	I:11893893	11893893	C	T	0.140127	0.0762806	0.117623	0.51665	0.2868035662747517	Mean number of eggs in utero	4.342193628794542	0	NA	NA	NA	NA	NA	NA	NA	NA	NA
I	I:11910095	11910095	A	C	0.0541401	0.517274	0.24542	0.0350557	1.4552413563768791	Mean number of eggs in utero	4.342193628794542	0	NA	NA	NA	NA	NA	NA	NA	NA	NA
I	I:11910284	11910284	A	G	0.066879	0.738381	0.287938	0.0103363	1.9856348942354256	Mean number of eggs in utero	4.342193628794542	0	NA	NA	NA	NA	NA	NA	NA	NA	NA
I	I:11928955	11928955	C	T	0.089172	0.0872048	0.133663	0.51413	0.28892705387595985	Mean number of eggs in utero	4.342193628794542	0	NA	NA	NA	NA	NA	NA	NA	NA	NA
I	I:11930001	11930001	G	T	0.0573248	-0.100763	0.14581	0.48953	0.31022068805854686	Mean number of eggs in utero	4.342193628794542	0	NA	NA	NA	NA	NA	NA	NA	NA	NA
I	I:11930256	11930256	A	T	0.0828025	-0.130785	0.140692	0.352585	0.4527361678046996	Mean number of eggs in utero	4.342193628794542	0	NA	NA	NA	NA	NA	NA	NA	NA	NA
I	I:11930538	11930538	G	A	0.127389	-0.118125	0.118701	0.319664	0.49530627045864106	Mean number of eggs in utero	4.342193628794542	0	NA	NA	NA	NA	NA	NA	NA	NA	NA
I	I:11936783	11936783	C	T	0.455414	-0.00692026	0.0724489	0.923903	0.03437362269340856	Mean number of eggs in utero	4.342193628794542	0	NA	NA	NA	NA	NA	NA	NA	NA	NA
I	I:11940766	11940766	A	G	0.474522	0.00601042	0.0740368	0.935298	0.029049994329752298	Mean number of eggs in utero	4.342193628794542	0	NA	NA	NA	NA	NA	NA	NA	NA	NA
I	I:11943825	11943825	A	G	0.0541401	0.128469	0.139431	0.356853	0.44751064785487615	Mean number of eggs in utero	4.342193628794542	0	NA	NA	NA	NA	NA	NA	NA	NA	NA
I	I:11949692	11949692	C	T	0.089172	0.0162357	0.169849	0.923847	0.03439994713231431	Mean number of eggs in utero	4.342193628794542	0	NA	NA	NA	NA	NA	NA	NA	NA	NA
I	I:11950044	11950044	C	T	0.308917	-0.019519	0.0750705	0.794857	0.09971099674861914	Mean number of eggs in utero	4.342193628794542	0	NA	NA	NA	NA	NA	NA	NA	NA	NA
I	I:11965825	11965825	T	G	0.0605096	-0.119961	0.144462	0.406316	0.39113607559410346	Mean number of eggs in utero	4.342193628794542	0	NA	NA	NA	NA	NA	NA	NA	NA	NA
I	I:11965842	11965842	G	A	0.140127	0.0718531	0.123048	0.559258	0.2523877947485336	Mean number of eggs in utero	4.342193628794542	0	NA	NA	NA	NA	NA	NA	NA	NA	NA
I	I:11967128	11967128	T	C	0.0573248	-0.0230523	0.146281	0.874781	0.058100658287311695	Mean number of eggs in utero	4.342193628794542	0	NA	NA	NA	NA	NA	NA	NA	NA	NA
I	I:11967447	11967447	C	A	0.0509554	-0.0431097	0.154503	0.780228	0.10777846824200024	Mean number of eggs in utero	4.342193628794542	0	NA	NA	NA	NA	NA	NA	NA	NA	NA
I	I:11968508	11968508	T	C	0.127389	0.138235	0.141189	0.327541	0.48473432938434347	Mean number of eggs in utero	4.342193628794542	0	NA	NA	NA	NA	NA	NA	NA	NA	NA
I	I:11970961	11970961	A	G	0.0573248	0.224709	0.161018	0.16285	0.788212237099108	Mean number of eggs in utero	4.342193628794542	0	NA	NA	NA	NA	NA	NA	NA	NA	NA
I	I:11973656	11973656	A	C	0.0923567	0.0898203	0.128216	0.48359	0.31552268835246067	Mean number of eggs in utero	4.342193628794542	0	NA	NA	NA	NA	NA	NA	NA	NA	NA
I	I:11977272	11977272	G	A	0.0573248	-0.111052	0.160618	0.48931	0.31041590849830725	Mean number of eggs in utero	4.342193628794542	0	NA	NA	NA	NA	NA	NA	NA	NA	NA
I	I:11978730	11978730	G	C	0.480892	-0.0242507	0.0754713	0.747965	0.1261187238768486	Mean number of eggs in utero	4.342193628794542	0	NA	NA	NA	NA	NA	NA	NA	NA	NA
I	I:11981740	11981740	A	G	0.194268	-0.0655381	0.0967945	0.498352	0.30246379447694166	Mean number of eggs in utero	4.342193628794542	0	NA	NA	NA	NA	NA	NA	NA	NA	NA
I	I:11987825	11987825	T	C	0.0732484	-0.183876	0.136473	0.177868	0.7499021782425483	Mean number of eggs in utero	4.342193628794542	0	NA	NA	NA	NA	NA	NA	NA	NA	NA
I	I:11989123	11989123	C	A	0.143312	-0.0623333	0.10726	0.561146	0.25092412850325374	Mean number of eggs in utero	4.342193628794542	0	NA	NA	NA	NA	NA	NA	NA	NA	NA
I	I:11992373	11992373	T	C	0.436306	-3.69788e-4	0.0762902	0.996133	0.0016826723093407079	Mean number of eggs in utero	4.342193628794542	0	NA	NA	NA	NA	NA	NA	NA	NA	NA
I	I:11998938	11998938	G	T	0.245223	-0.00984908	0.0966467	0.91883	0.03676483343591701	Mean number of eggs in utero	4.342193628794542	0	NA	NA	NA	NA	NA	NA	NA	NA	NA
I	I:12001465	12001465	T	C	0.127389	-0.109407	0.11567	0.344223	0.46316011471919166	Mean number of eggs in utero	4.342193628794542	0	NA	NA	NA	NA	NA	NA	NA	NA	NA
I	I:12020247	12020247	T	C	0.0573248	0.00282857	0.164878	0.986313	0.005985242663614321	Mean number of eggs in utero	4.342193628794542	0	NA	NA	NA	NA	NA	NA	NA	NA	NA
I	I:12022994	12022994	A	G	0.0573248	0.0351524	0.200383	0.860745	0.06512549139844595	Mean number of eggs in utero	4.342193628794542	0	NA	NA	NA	NA	NA	NA	NA	NA	NA
I	I:12039519	12039519	G	A	0.0764331	0.542839	0.190477	0.00437348	2.359172855170275	Mean number of eggs in utero	4.342193628794542	0	NA	NA	NA	NA	NA	NA	NA	NA	NA
I	I:12056068	12056068	C	T	0.0509554	-0.0476017	0.16264	0.769766	0.1136412752867408	Mean number of eggs in utero	4.342193628794542	0	NA	NA	NA	NA	NA	NA	NA	NA	NA
I	I:12056092	12056092	C	G	0.0636943	-0.0414824	0.149201	0.780989	0.10735508298946506	Mean number of eggs in utero	4.342193628794542	0	NA	NA	NA	NA	NA	NA	NA	NA	NA
I	I:12056393	12056393	C	T	0.254777	0.0100554	0.0799077	0.899861	0.04582457011082323	Mean number of eggs in utero	4.342193628794542	0	NA	NA	NA	NA	NA	NA	NA	NA	NA
I	I:12058539	12058539	G	T	0.0955414	0.0414064	0.151087	0.784042	0.10566067216291346	Mean number of eggs in utero	4.342193628794542	0	NA	NA	NA	NA	NA	NA	NA	NA	NA
I	I:12064747	12064747	T	C	0.0541401	-0.117742	0.147989	0.426256	0.37032949480636224	Mean number of eggs in utero	4.342193628794542	0	NA	NA	NA	NA	NA	NA	NA	NA	NA
I	I:12068853	12068853	C	T	0.124204	-0.0546771	0.118404	0.644237	0.19095433627760514	Mean number of eggs in utero	4.342193628794542	0	NA	NA	NA	NA	NA	NA	NA	NA	NA
I	I:12070233	12070233	C	A	0.130573	0.00523988	0.121073	0.965479	0.015257168060977154	Mean number of eggs in utero	4.342193628794542	0	NA	NA	NA	NA	NA	NA	NA	NA	NA
I	I:12070556	12070556	T	A	0.0573248	-0.115146	0.144708	0.4262	0.3703865546218168	Mean number of eggs in utero	4.342193628794542	0	NA	NA	NA	NA	NA	NA	NA	NA	NA
I	I:12088290	12088290	A	G	0.140127	0.0273283	0.111893	0.807047	0.09310117253161525	Mean number of eggs in utero	4.342193628794542	0	NA	NA	NA	NA	NA	NA	NA	NA	NA
I	I:12101627	12101627	C	T	0.156051	0.083284	0.108778	0.443893	0.35272170355616844	Mean number of eggs in utero	4.342193628794542	0	NA	NA	NA	NA	NA	NA	NA	NA	NA
I	I:12101662	12101662	A	C	0.0573248	-0.100402	0.141569	0.478195	0.32039496917332205	Mean number of eggs in utero	4.342193628794542	0	NA	NA	NA	NA	NA	NA	NA	NA	NA
I	I:12101705	12101705	T	A	0.0732484	0.0238366	0.125296	0.849119	0.07103144117919132	Mean number of eggs in utero	4.342193628794542	0	NA	NA	NA	NA	NA	NA	NA	NA	NA
I	I:12101828	12101828	A	C	0.296178	0.00416991	0.0741394	0.955147	0.01992978404357889	Mean number of eggs in utero	4.342193628794542	0	NA	NA	NA	NA	NA	NA	NA	NA	NA
I	I:12101966	12101966	T	A	0.11465	0.012209	0.111003	0.912419	0.039805679654441095	Mean number of eggs in utero	4.342193628794542	0	NA	NA	NA	NA	NA	NA	NA	NA	NA
I	I:12102194	12102194	A	G	0.0636943	-0.0281792	0.142452	0.843189	0.07407506777486597	Mean number of eggs in utero	4.342193628794542	0	NA	NA	NA	NA	NA	NA	NA	NA	NA
I	I:12107722	12107722	A	C	0.0796178	0.0368122	0.12314	0.764982	0.11634878366029601	Mean number of eggs in utero	4.342193628794542	0	NA	NA	NA	NA	NA	NA	NA	NA	NA
I	I:12107731	12107731	G	A	0.232484	-0.0634823	0.0877222	0.469266	0.3285809108360819	Mean number of eggs in utero	4.342193628794542	0	NA	NA	NA	NA	NA	NA	NA	NA	NA
I	I:12107806	12107806	C	T	0.124204	-0.0115245	0.10381	0.911604	0.04019377785967834	Mean number of eggs in utero	4.342193628794542	0	NA	NA	NA	NA	NA	NA	NA	NA	NA
I	I:12108119	12108119	C	T	0.0541401	0.107984	0.139821	0.439937	0.35660951103952554	Mean number of eggs in utero	4.342193628794542	0	NA	NA	NA	NA	NA	NA	NA	NA	NA
I	I:12123412	12123412	C	T	0.0700637	-0.0876437	0.143445	0.541206	0.2666373973064044	Mean number of eggs in utero	4.342193628794542	0	NA	NA	NA	NA	NA	NA	NA	NA	NA
I	I:12130118	12130118	T	C	0.0636943	-0.127729	0.13765	0.353445	0.45167815769420516	Mean number of eggs in utero	4.342193628794542	0	NA	NA	NA	NA	NA	NA	NA	NA	NA
I	I:12151945	12151945	A	C	0.133758	-0.0533156	0.108598	0.623465	0.20518792187030635	Mean number of eggs in utero	4.342193628794542	0	NA	NA	NA	NA	NA	NA	NA	NA	NA
I	I:12154164	12154164	C	T	0.464968	0.036623	0.0763375	0.631404	0.19969267114125946	Mean number of eggs in utero	4.342193628794542	0	NA	NA	NA	NA	NA	NA	NA	NA	NA
I	I:12160395	12160395	G	T	0.066879	0.0277191	0.132654	0.83448	0.07858406760513555	Mean number of eggs in utero	4.342193628794542	0	NA	NA	NA	NA	NA	NA	NA	NA	NA
I	I:12161182	12161182	A	C	0.0859873	0.00525849	0.122762	0.965833	0.015097959969984578	Mean number of eggs in utero	4.342193628794542	0	NA	NA	NA	NA	NA	NA	NA	NA	NA
I	I:12162923	12162923	G	A	0.0700637	-0.16664	0.136298	0.221473	0.6546792114984452	Mean number of eggs in utero	4.342193628794542	0	NA	NA	NA	NA	NA	NA	NA	NA	NA
I	I:12167052	12167052	G	C	0.394904	0.0657364	0.073665	0.372195	0.4292294653992202	Mean number of eggs in utero	4.342193628794542	0	NA	NA	NA	NA	NA	NA	NA	NA	NA
I	I:12168455	12168455	T	C	0.308917	0.0439473	0.0740092	0.55264	0.25755768411263524	Mean number of eggs in utero	4.342193628794542	0	NA	NA	NA	NA	NA	NA	NA	NA	NA
I	I:12168896	12168896	T	G	0.066879	-0.0463433	0.135327	0.73201	0.13548298599740816	Mean number of eggs in utero	4.342193628794542	0	NA	NA	NA	NA	NA	NA	NA	NA	NA
I	I:12169176	12169176	A	G	0.0636943	0.137651	0.153898	0.371093	0.4305172377558943	Mean number of eggs in utero	4.342193628794542	0	NA	NA	NA	NA	NA	NA	NA	NA	NA
I	I:12174150	12174150	T	G	0.264331	0.0770737	0.077502	0.319993	0.49485952197579547	Mean number of eggs in utero	4.342193628794542	0	NA	NA	NA	NA	NA	NA	NA	NA	NA
I	I:12175828	12175828	C	T	0.0509554	-0.125026	0.15661	0.424681	0.3719371686767079	Mean number of eggs in utero	4.342193628794542	0	NA	NA	NA	NA	NA	NA	NA	NA	NA
I	I:12177991	12177991	C	A	0.101911	-0.112108	0.118671	0.344816	0.4624125904387041	Mean number of eggs in utero	4.342193628794542	0	NA	NA	NA	NA	NA	NA	NA	NA	NA
I	I:12184286	12184286	G	A	0.0573248	0.359236	0.169045	0.0335792	1.4739296548246583	Mean number of eggs in utero	4.342193628794542	0	NA	NA	NA	NA	NA	NA	NA	NA	NA
I	I:12184391	12184391	A	C	0.0509554	-0.137693	0.1569	0.38017	0.42002215719311564	Mean number of eggs in utero	4.342193628794542	0	NA	NA	NA	NA	NA	NA	NA	NA	NA
I	I:12185851	12185851	A	G	0.121019	0.106142	0.131537	0.419703	0.3770579264787905	Mean number of eggs in utero	4.342193628794542	0	NA	NA	NA	NA	NA	NA	NA	NA	NA
I	I:12185950	12185950	A	G	0.089172	0.148164	0.134473	0.270542	0.5677653037466408	Mean number of eggs in utero	4.342193628794542	0	NA	NA	NA	NA	NA	NA	NA	NA	NA
I	I:12188466	12188466	T	G	0.33121	-0.0275295	0.0749788	0.713497	0.14660784859864714	Mean number of eggs in utero	4.342193628794542	0	NA	NA	NA	NA	NA	NA	NA	NA	NA
I	I:12188600	12188600	A	G	0.0541401	0.0266656	0.154903	0.863324	0.06382618573926963	Mean number of eggs in utero	4.342193628794542	0	NA	NA	NA	NA	NA	NA	NA	NA	NA
I	I:12198706	12198706	T	A	0.10828	-0.121223	0.129935	0.350843	0.45488718406804496	Mean number of eggs in utero	4.342193628794542	0	NA	NA	NA	NA	NA	NA	NA	NA	NA
I	I:12203270	12203270	A	G	0.0509554	-0.149284	0.183703	0.416427	0.38046111976941765	Mean number of eggs in utero	4.342193628794542	0	NA	NA	NA	NA	NA	NA	NA	NA	NA
I	I:12206097	12206097	G	T	0.372611	0.0418605	0.0737065	0.570079	0.24406495680695034	Mean number of eggs in utero	4.342193628794542	0	NA	NA	NA	NA	NA	NA	NA	NA	NA
I	I:12206176	12206176	T	A	0.452229	-0.0124327	0.0744736	0.867417	0.06177207061953235	Mean number of eggs in utero	4.342193628794542	0	NA	NA	NA	NA	NA	NA	NA	NA	NA
I	I:12207410	12207410	G	A	0.0859873	-0.168957	0.120157	0.159684	0.7967385970726752	Mean number of eggs in utero	4.342193628794542	0	NA	NA	NA	NA	NA	NA	NA	NA	NA
I	I:12209362	12209362	A	C	0.130573	-0.0849807	0.106189	0.423551	0.37309428855632976	Mean number of eggs in utero	4.342193628794542	0	NA	NA	NA	NA	NA	NA	NA	NA	NA
I	I:12214744	12214744	A	G	0.0987261	0.238979	0.163983	0.145023	0.8385631151377526	Mean number of eggs in utero	4.342193628794542	0	NA	NA	NA	NA	NA	NA	NA	NA	NA
I	I:12215565	12215565	T	C	0.0828025	0.0419823	0.121938	0.730626	0.13630487707946062	Mean number of eggs in utero	4.342193628794542	0	NA	NA	NA	NA	NA	NA	NA	NA	NA
I	I:12216009	12216009	C	T	0.0764331	0.0739947	0.134826	0.583132	0.23423312554500628	Mean number of eggs in utero	4.342193628794542	0	NA	NA	NA	NA	NA	NA	NA	NA	NA
I	I:12216403	12216403	T	A	0.0541401	0.111447	0.145505	0.443717	0.352893931966882	Mean number of eggs in utero	4.342193628794542	0	NA	NA	NA	NA	NA	NA	NA	NA	NA
I	I:12218810	12218810	G	T	0.127389	0.104361	0.130584	0.42418	0.37244981223247864	Mean number of eggs in utero	4.342193628794542	0	NA	NA	NA	NA	NA	NA	NA	NA	NA
I	I:12220536	12220536	A	T	0.0828025	0.228166	0.170883	0.181804	0.7403965657850249	Mean number of eggs in utero	4.342193628794542	0	NA	NA	NA	NA	NA	NA	NA	NA	NA
I	I:12223766	12223766	C	T	0.0636943	0.21076	0.152953	0.168222	0.7741172079803815	Mean number of eggs in utero	4.342193628794542	0	NA	NA	NA	NA	NA	NA	NA	NA	NA
I	I:12234669	12234669	T	C	0.315287	0.0270859	0.0759006	0.721197	0.14194608850281862	Mean number of eggs in utero	4.342193628794542	0	NA	NA	NA	NA	NA	NA	NA	NA	NA
I	I:12239527	12239527	C	G	0.471338	0.0723611	0.0768128	0.34617	0.4607105719285547	Mean number of eggs in utero	4.342193628794542	0	NA	NA	NA	NA	NA	NA	NA	NA	NA
I	I:12240592	12240592	G	A	0.0764331	0.10851	0.143528	0.449636	0.34713892436194577	Mean number of eggs in utero	4.342193628794542	0	NA	NA	NA	NA	NA	NA	NA	NA	NA
I	I:12285355	12285355	T	C	0.347134	0.128961	0.0761757	0.0904662	1.0435136516827639	Mean number of eggs in utero	4.342193628794542	0	NA	NA	NA	NA	NA	NA	NA	NA	NA
I	I:12312928	12312928	T	A	0.124204	0.0852856	0.107153	0.426075	0.37051394733104137	Mean number of eggs in utero	4.342193628794542	0	NA	NA	NA	NA	NA	NA	NA	NA	NA
I	I:12313936	12313936	T	A	0.0636943	-0.0913455	0.135575	0.500463	0.3006280250574196	Mean number of eggs in utero	4.342193628794542	0	NA	NA	NA	NA	NA	NA	NA	NA	NA
I	I:12319864	12319864	A	G	0.302548	0.0576581	0.0750317	0.44222	0.3543616197554516	Mean number of eggs in utero	4.342193628794542	0	NA	NA	NA	NA	NA	NA	NA	NA	NA
I	I:12320547	12320547	A	G	0.0509554	-0.108376	0.202469	0.592463	0.22733876666398606	Mean number of eggs in utero	4.342193628794542	0	NA	NA	NA	NA	NA	NA	NA	NA	NA
I	I:12323545	12323545	A	C	0.0828025	-0.0649732	0.120319	0.589191	0.22974389570617118	Mean number of eggs in utero	4.342193628794542	0	NA	NA	NA	NA	NA	NA	NA	NA	NA
I	I:12324736	12324736	C	A	0.127389	-0.0334757	0.115383	0.771719	0.11254080713170146	Mean number of eggs in utero	4.342193628794542	0	NA	NA	NA	NA	NA	NA	NA	NA	NA
I	I:12328943	12328943	A	G	0.0509554	-0.150589	0.156392	0.335599	0.47417934192894207	Mean number of eggs in utero	4.342193628794542	0	NA	NA	NA	NA	NA	NA	NA	NA	NA
I	I:12330942	12330942	T	G	0.289809	0.00232983	0.0777935	0.976108	0.01050212781573703	Mean number of eggs in utero	4.342193628794542	0	NA	NA	NA	NA	NA	NA	NA	NA	NA
I	I:12335757	12335757	T	C	0.273885	0.0108266	0.0785003	0.890305	0.05046118759621286	Mean number of eggs in utero	4.342193628794542	0	NA	NA	NA	NA	NA	NA	NA	NA	NA
I	I:12342666	12342666	A	G	0.44586	0.0898374	0.0764608	0.240016	0.6197598062879897	Mean number of eggs in utero	4.342193628794542	0	NA	NA	NA	NA	NA	NA	NA	NA	NA
I	I:12400093	12400093	C	T	0.0541401	-0.0538916	0.152558	0.723898	0.14032262324745126	Mean number of eggs in utero	4.342193628794542	0	NA	NA	NA	NA	NA	NA	NA	NA	NA
I	I:12421147	12421147	C	T	0.0764331	0.0833171	0.130168	0.522126	0.2822246799450346	Mean number of eggs in utero	4.342193628794542	0	NA	NA	NA	NA	NA	NA	NA	NA	NA
I	I:12422178	12422178	C	T	0.283439	0.057268	0.0761811	0.45221	0.3446598380614252	Mean number of eggs in utero	4.342193628794542	0	NA	NA	NA	NA	NA	NA	NA	NA	NA
I	I:12426622	12426622	T	C	0.0541401	4.50387e-4	0.16435	0.997813	9.508421572237354e-4	Mean number of eggs in utero	4.342193628794542	0	NA	NA	NA	NA	NA	NA	NA	NA	NA
I	I:12428839	12428839	T	C	0.353503	0.08356	0.0730046	0.252381	0.5979433431907828	Mean number of eggs in utero	4.342193628794542	0	NA	NA	NA	NA	NA	NA	NA	NA	NA
I	I:12431362	12431362	C	G	0.0605096	-0.0247607	0.138676	0.858291	0.06636544144318632	Mean number of eggs in utero	4.342193628794542	0	NA	NA	NA	NA	NA	NA	NA	NA	NA
I	I:12433277	12433277	C	T	0.0700637	0.0257333	0.1246	0.836379	0.07759688008513438	Mean number of eggs in utero	4.342193628794542	0	NA	NA	NA	NA	NA	NA	NA	NA	NA
I	I:12435810	12435810	A	T	0.38535	0.0215752	0.0740886	0.770892	0.1130064612349622	Mean number of eggs in utero	4.342193628794542	0	NA	NA	NA	NA	NA	NA	NA	NA	NA
I	I:12454051	12454051	G	A	0.0541401	0.0107884	0.145905	0.941057	0.026384070477363335	Mean number of eggs in utero	4.342193628794542	0	NA	NA	NA	NA	NA	NA	NA	NA	NA
I	I:12455489	12455489	A	G	0.286624	0.0547403	0.0786901	0.486652	0.31278148745930257	Mean number of eggs in utero	4.342193628794542	0	NA	NA	NA	NA	NA	NA	NA	NA	NA
I	I:12475516	12475516	G	A	0.442675	0.0766747	0.077544	0.322766	0.49111221989197273	Mean number of eggs in utero	4.342193628794542	0	NA	NA	NA	NA	NA	NA	NA	NA	NA
I	I:12475539	12475539	C	A	0.229299	0.0486346	0.0844427	0.56465	0.24822066752341987	Mean number of eggs in utero	4.342193628794542	0	NA	NA	NA	NA	NA	NA	NA	NA	NA
I	I:12476056	12476056	A	G	0.334395	0.0779097	0.0753577	0.301199	0.5211464743544806	Mean number of eggs in utero	4.342193628794542	0	NA	NA	NA	NA	NA	NA	NA	NA	NA
I	I:12491704	12491704	C	G	0.0509554	0.127435	0.17609	0.469254	0.3285920166916484	Mean number of eggs in utero	4.342193628794542	0	NA	NA	NA	NA	NA	NA	NA	NA	NA
I	I:12497210	12497210	T	C	0.461783	-0.02024	0.0747481	0.786563	0.10426648670044664	Mean number of eggs in utero	4.342193628794542	0	NA	NA	NA	NA	NA	NA	NA	NA	NA
I	I:12505636	12505636	G	A	0.0700637	-0.0263757	0.226311	0.90722	0.0422873841633649	Mean number of eggs in utero	4.342193628794542	0	NA	NA	NA	NA	NA	NA	NA	NA	NA
I	I:12507135	12507135	A	C	0.16879	-0.0617962	0.106836	0.562978	0.2495085761349485	Mean number of eggs in utero	4.342193628794542	0	NA	NA	NA	NA	NA	NA	NA	NA	NA
I	I:12511695	12511695	C	A	0.0987261	-0.0667811	0.109416	0.541635	0.2662932796705109	Mean number of eggs in utero	4.342193628794542	0	NA	NA	NA	NA	NA	NA	NA	NA	NA
I	I:12512694	12512694	T	A	0.0541401	-0.167449	0.214743	0.435529	0.3609829218947616	Mean number of eggs in utero	4.342193628794542	0	NA	NA	NA	NA	NA	NA	NA	NA	NA
I	I:12519409	12519409	T	G	0.0700637	-0.0606695	0.249322	0.807744	0.09272625927945402	Mean number of eggs in utero	4.342193628794542	0	NA	NA	NA	NA	NA	NA	NA	NA	NA
I	I:12519814	12519814	C	T	0.22293	0.0464248	0.0849321	0.584646	0.23310701730525127	Mean number of eggs in utero	4.342193628794542	0	NA	NA	NA	NA	NA	NA	NA	NA	NA
I	I:12521669	12521669	T	C	0.140127	0.0205777	0.112371	0.854702	0.06818527979194582	Mean number of eggs in utero	4.342193628794542	0	NA	NA	NA	NA	NA	NA	NA	NA	NA
I	I:12527236	12527236	T	C	0.468153	0.0157271	0.072237	0.827651	0.08215275587949072	Mean number of eggs in utero	4.342193628794542	0	NA	NA	NA	NA	NA	NA	NA	NA	NA
I	I:12527475	12527475	T	A	0.140127	0.049297	0.108002	0.648071	0.18837741200119618	Mean number of eggs in utero	4.342193628794542	0	NA	NA	NA	NA	NA	NA	NA	NA	NA
I	I:12529344	12529344	C	A	0.0509554	-0.203289	0.186946	0.276851	0.5577539034552894	Mean number of eggs in utero	4.342193628794542	0	NA	NA	NA	NA	NA	NA	NA	NA	NA
I	I:12529377	12529377	A	G	0.0732484	-0.243305	0.169017	0.15	0.8239087409443188	Mean number of eggs in utero	4.342193628794542	0	NA	NA	NA	NA	NA	NA	NA	NA	NA
I	I:12530021	12530021	C	T	0.171975	0.0531711	0.102155	0.602719	0.219885117699014	Mean number of eggs in utero	4.342193628794542	0	NA	NA	NA	NA	NA	NA	NA	NA	NA
I	I:12530474	12530474	A	G	0.0509554	0.133988	0.140376	0.339833	0.4687344505934339	Mean number of eggs in utero	4.342193628794542	0	NA	NA	NA	NA	NA	NA	NA	NA	NA
I	I:12538057	12538057	G	A	0.0605096	-0.00480645	0.136454	0.971901	0.012377971023751261	Mean number of eggs in utero	4.342193628794542	0	NA	NA	NA	NA	NA	NA	NA	NA	NA
I	I:12545019	12545019	A	G	0.22293	0.0464248	0.0849321	0.584646	0.23310701730525127	Mean number of eggs in utero	4.342193628794542	0	NA	NA	NA	NA	NA	NA	NA	NA	NA
I	I:12546414	12546414	A	G	0.0955414	-0.0339656	0.127555	0.790022	0.10236081460124553	Mean number of eggs in utero	4.342193628794542	0	NA	NA	NA	NA	NA	NA	NA	NA	NA
I	I:12547267	12547267	G	A	0.0636943	-0.251862	0.173607	0.146848	0.8331319639854347	Mean number of eggs in utero	4.342193628794542	0	NA	NA	NA	NA	NA	NA	NA	NA	NA
I	I:12550467	12550467	T	G	0.152866	-0.0561414	0.101232	0.57918	0.23718644342624975	Mean number of eggs in utero	4.342193628794542	0	NA	NA	NA	NA	NA	NA	NA	NA	NA
I	I:12551658	12551658	C	T	0.484076	-0.0230245	0.0697178	0.741209	0.130059315976714	Mean number of eggs in utero	4.342193628794542	0	NA	NA	NA	NA	NA	NA	NA	NA	NA
I	I:12554785	12554785	T	C	0.133758	-0.0180805	0.1132	0.8731	0.05893601178009799	Mean number of eggs in utero	4.342193628794542	0	NA	NA	NA	NA	NA	NA	NA	NA	NA
I	I:12556874	12556874	G	T	0.318471	-0.033727	0.0855784	0.693503	0.15895165588755625	Mean number of eggs in utero	4.342193628794542	0	NA	NA	NA	NA	NA	NA	NA	NA	NA
I	I:12557044	12557044	G	T	0.232484	-0.0249812	0.0881352	0.776838	0.1096695385240105	Mean number of eggs in utero	4.342193628794542	0	NA	NA	NA	NA	NA	NA	NA	NA	NA
I	I:12558306	12558306	C	T	0.5	-0.00459009	0.0733207	0.950083	0.022238452745437152	Mean number of eggs in utero	4.342193628794542	0	NA	NA	NA	NA	NA	NA	NA	NA	NA
I	I:12559752	12559752	A	T	0.178344	-0.028397	0.0963453	0.768191	0.11453078526409129	Mean number of eggs in utero	4.342193628794542	0	NA	NA	NA	NA	NA	NA	NA	NA	NA
I	I:12559875	12559875	A	T	0.10828	0.028088	0.12806	0.82639	0.08281494677775765	Mean number of eggs in utero	4.342193628794542	0	NA	NA	NA	NA	NA	NA	NA	NA	NA
I	I:12559887	12559887	T	C	0.305732	0.00666827	0.0782887	0.932122	0.030527241659685286	Mean number of eggs in utero	4.342193628794542	0	NA	NA	NA	NA	NA	NA	NA	NA	NA
I	I:12565598	12565598	T	C	0.39172	0.0294179	0.0730476	0.687152	0.16294718512443135	Mean number of eggs in utero	4.342193628794542	0	NA	NA	NA	NA	NA	NA	NA	NA	NA
I	I:12566122	12566122	A	G	0.0796178	-0.129591	0.145388	0.372741	0.42859283398502773	Mean number of eggs in utero	4.342193628794542	0	NA	NA	NA	NA	NA	NA	NA	NA	NA
I	I:12569617	12569617	G	A	0.0700637	-0.178108	0.199992	0.373158	0.428107243260758	Mean number of eggs in utero	4.342193628794542	0	NA	NA	NA	NA	NA	NA	NA	NA	NA
I	I:12570738	12570738	G	T	0.43949	0.0175065	0.0748535	0.81508100000000006	0.08879923039493369	Mean number of eggs in utero	4.342193628794542	0	NA	NA	NA	NA	NA	NA	NA	NA	NA
I	I:12571927	12571927	C	T	0.0509554	0.133988	0.140376	0.339833	0.4687344505934339	Mean number of eggs in utero	4.342193628794542	0	NA	NA	NA	NA	NA	NA	NA	NA	NA
I	I:12574005	12574005	G	A	0.194268	-0.0175422	0.0981904	0.858209	0.066406935352354	Mean number of eggs in utero	4.342193628794542	0	NA	NA	NA	NA	NA	NA	NA	NA	NA
I	I:12576527	12576527	T	G	0.0955414	0.0121641	0.112265	0.913716	0.039188770129413415	Mean number of eggs in utero	4.342193628794542	0	NA	NA	NA	NA	NA	NA	NA	NA	NA
I	I:12577455	12577455	C	T	0.105096	-0.0912967	0.131544	0.487659	0.3118837562441137	Mean number of eggs in utero	4.342193628794542	0	NA	NA	NA	NA	NA	NA	NA	NA	NA
I	I:12578375	12578375	G	A	0.449045	-0.00314123	0.0730518	0.965701	0.015157318875083306	Mean number of eggs in utero	4.342193628794542	0	NA	NA	NA	NA	NA	NA	NA	NA	NA
I	I:12580124	12580124	G	A	0.0636943	0.0516534	0.12745	0.685269	0.1641389142258783	Mean number of eggs in utero	4.342193628794542	0	NA	NA	NA	NA	NA	NA	NA	NA	NA
I	I:12581234	12581234	C	A	0.0509554	-0.0044632	0.1595	0.977676	0.009805045749526418	Mean number of eggs in utero	4.342193628794542	0	NA	NA	NA	NA	NA	NA	NA	NA	NA
I	I:12586621	12586621	T	C	0.11465	-0.110691	0.138335	0.423616	0.37302764492790913	Mean number of eggs in utero	4.342193628794542	0	NA	NA	NA	NA	NA	NA	NA	NA	NA
I	I:12591430	12591430	C	T	0.251592	0.0914458	0.0814668	0.261654	0.5822726216556398	Mean number of eggs in utero	4.342193628794542	0	NA	NA	NA	NA	NA	NA	NA	NA	NA
I	I:12608796	12608796	T	G	0.245223	0.0241421	0.0814383	0.766889	0.11526749156087067	Mean number of eggs in utero	4.342193628794542	0	NA	NA	NA	NA	NA	NA	NA	NA	NA
I	I:12609340	12609340	A	T	0.133758	0.065702	0.103736	0.526499	0.2786024493500888	Mean number of eggs in utero	4.342193628794542	0	NA	NA	NA	NA	NA	NA	NA	NA	NA
I	I:12609551	12609551	T	G	0.0541401	-0.0512252	0.148218	0.729638	0.13689255576440357	Mean number of eggs in utero	4.342193628794542	0	NA	NA	NA	NA	NA	NA	NA	NA	NA
I	I:12611846	12611846	T	A	0.286624	0.0220354	0.0772334	0.775407	0.11047028271022333	Mean number of eggs in utero	4.342193628794542	0	NA	NA	NA	NA	NA	NA	NA	NA	NA
I	I:12614571	12614571	A	G	0.0732484	-0.0975269	0.156484	0.533129	0.2731676930191672	Mean number of eggs in utero	4.342193628794542	0	NA	NA	NA	NA	NA	NA	NA	NA	NA
I	I:12614679	12614679	T	C	0.105096	-0.0912967	0.131544	0.487659	0.3118837562441137	Mean number of eggs in utero	4.342193628794542	0	NA	NA	NA	NA	NA	NA	NA	NA	NA
I	I:12615223	12615223	C	A	0.429936	0.0372242	0.0735508	0.612785	0.2126918740819785	Mean number of eggs in utero	4.342193628794542	0	NA	NA	NA	NA	NA	NA	NA	NA	NA
I	I:12621403	12621403	C	A	0.356688	0.00779061	0.0743316	0.916528	0.03785426276969339	Mean number of eggs in utero	4.342193628794542	0	NA	NA	NA	NA	NA	NA	NA	NA	NA
I	I:12623561	12623561	C	T	0.0859873	0.0401426	0.115048	0.727149	0.13837658880051554	Mean number of eggs in utero	4.342193628794542	0	NA	NA	NA	NA	NA	NA	NA	NA	NA
I	I:12626491	12626491	A	C	0.318471	0.0467202	0.076164	0.539601	0.26792725415565694	Mean number of eggs in utero	4.342193628794542	0	NA	NA	NA	NA	NA	NA	NA	NA	NA
I	I:12650385	12650385	T	C	0.257962	0.0202939	0.0803773	0.800667	0.09654807084744983	Mean number of eggs in utero	4.342193628794542	0	NA	NA	NA	NA	NA	NA	NA	NA	NA
I	I:12652076	12652076	A	T	0.312102	0.0625947	0.0751085	0.404625	0.3929472875893705	Mean number of eggs in utero	4.342193628794542	0	NA	NA	NA	NA	NA	NA	NA	NA	NA
I	I:12652808	12652808	A	C	0.121019	-0.0718066	0.12091	0.552589	0.2575977645278122	Mean number of eggs in utero	4.342193628794542	0	NA	NA	NA	NA	NA	NA	NA	NA	NA
I	I:12660974	12660974	A	G	0.302548	0.0612573	0.0756089	0.417833	0.37899726289104746	Mean number of eggs in utero	4.342193628794542	0	NA	NA	NA	NA	NA	NA	NA	NA	NA
I	I:12665105	12665105	G	C	0.328025	0.0617504	0.0754341	0.413014	0.384035226746272	Mean number of eggs in utero	4.342193628794542	0	NA	NA	NA	NA	NA	NA	NA	NA	NA
[truncated: 25,469 more rows]

## Sheet: Figure 2B
Chromosome	Marker	Position	A1	A2	AF1	BETA	SE	P	log10p	Trait	BF	aboveBF	strain	value	allele	var.exp	startPOS	peakPOS	endPOS	peak_id	interval_size
I	I:3979	3979	G	C	0.320635	0.0869699	0.0590768	0.14098	0.850842493768144	CV_mean_number	4.342568737130753	0	NA	NA	NA	NA	NA	NA	NA	NA	NA
I	I:6580	6580	T	A	0.247619	0.107833	0.06381	0.091046	1.0407391296723285	CV_mean_number	4.342568737130753	0	NA	NA	NA	NA	NA	NA	NA	NA	NA
I	I:8174	8174	T	C	0.0730159	-0.0169197	0.106343	0.873587	0.058693837402928654	CV_mean_number	4.342568737130753	0	NA	NA	NA	NA	NA	NA	NA	NA	NA
I	I:13117	13117	A	C	0.104762	0.0322544	0.090326	0.721026	0.1420490744581854	CV_mean_number	4.342568737130753	0	NA	NA	NA	NA	NA	NA	NA	NA	NA
I	I:15024	15024	A	G	0.136508	0.195497	0.0798256	0.0143232	1.8439599438237817	CV_mean_number	4.342568737130753	0	NA	NA	NA	NA	NA	NA	NA	NA	NA
I	I:17509	17509	G	A	0.0603175	-0.0650357	0.116156	0.575549	0.2399176963196436	CV_mean_number	4.342568737130753	0	NA	NA	NA	NA	NA	NA	NA	NA	NA
I	I:41980	41980	G	A	0.320635	0.0869699	0.0590768	0.14098	0.850842493768144	CV_mean_number	4.342568737130753	0	NA	NA	NA	NA	NA	NA	NA	NA	NA
I	I:43212	43212	T	G	0.247619	0.107833	0.06381	0.091046	1.0407391296723285	CV_mean_number	4.342568737130753	0	NA	NA	NA	NA	NA	NA	NA	NA	NA
I	I:52316	52316	C	T	0.0730159	-0.0169197	0.106343	0.873587	0.058693837402928654	CV_mean_number	4.342568737130753	0	NA	NA	NA	NA	NA	NA	NA	NA	NA
I	I:62304	62304	A	G	0.0571429	-0.0990303	0.119066	0.405565	0.39193953139349785	CV_mean_number	4.342568737130753	0	NA	NA	NA	NA	NA	NA	NA	NA	NA
I	I:62576	62576	A	T	0.0603175	0.311633	0.114872	0.00667024	2.1758585395766312	CV_mean_number	4.342568737130753	0	NA	NA	NA	NA	NA	NA	NA	NA	NA
I	I:68640	68640	A	G	0.104762	0.0322544	0.090326	0.721026	0.1420490744581854	CV_mean_number	4.342568737130753	0	NA	NA	NA	NA	NA	NA	NA	NA	NA
I	I:86468	86468	G	A	0.320635	0.0869699	0.0590768	0.14098	0.850842493768144	CV_mean_number	4.342568737130753	0	NA	NA	NA	NA	NA	NA	NA	NA	NA
I	I:105302	105302	A	C	0.0730159	-0.0169197	0.106343	0.873587	0.058693837402928654	CV_mean_number	4.342568737130753	0	NA	NA	NA	NA	NA	NA	NA	NA	NA
I	I:105643	105643	T	G	0.0571429	-0.0990303	0.119066	0.405565	0.39193953139349785	CV_mean_number	4.342568737130753	0	NA	NA	NA	NA	NA	NA	NA	NA	NA
I	I:108121	108121	A	T	0.415873	-0.0416064	0.0560863	0.458191	0.33895344567635644	CV_mean_number	4.342568737130753	0	NA	NA	NA	NA	NA	NA	NA	NA	NA
I	I:109460	109460	A	T	0.212698	0.101871	0.0673657	0.13048	0.8844560519677805	CV_mean_number	4.342568737130753	0	NA	NA	NA	NA	NA	NA	NA	NA	NA
I	I:113772	113772	A	T	0.250794	0.105859	0.0635472	0.095746	1.018879360588732	CV_mean_number	4.342568737130753	0	NA	NA	NA	NA	NA	NA	NA	NA	NA
I	I:116374	116374	T	G	0.155556	0.00640114	0.0763377	0.933173	0.030037835374048364	CV_mean_number	4.342568737130753	0	NA	NA	NA	NA	NA	NA	NA	NA	NA
I	I:123411	123411	T	G	0.104762	0.0322544	0.090326	0.721026	0.1420490744581854	CV_mean_number	4.342568737130753	0	NA	NA	NA	NA	NA	NA	NA	NA	NA
I	I:128077	128077	T	A	0.320635	0.0869699	0.0590768	0.14098	0.850842493768144	CV_mean_number	4.342568737130753	0	NA	NA	NA	NA	NA	NA	NA	NA	NA
I	I:136765	136765	G	A	0.0730159	-0.0169197	0.106343	0.873587	0.058693837402928654	CV_mean_number	4.342568737130753	0	NA	NA	NA	NA	NA	NA	NA	NA	NA
I	I:155895	155895	T	A	0.0571429	0.105863	0.119048	0.37387	0.42727938201660587	CV_mean_number	4.342568737130753	0	NA	NA	NA	NA	NA	NA	NA	NA	NA
I	I:159475	159475	A	G	0.247619	0.107833	0.06381	0.091046	1.0407391296723285	CV_mean_number	4.342568737130753	0	NA	NA	NA	NA	NA	NA	NA	NA	NA
I	I:161490	161490	T	A	0.0603175	-0.0650357	0.116156	0.575549	0.2399176963196436	CV_mean_number	4.342568737130753	0	NA	NA	NA	NA	NA	NA	NA	NA	NA
I	I:171171	171171	A	G	0.104762	0.0322544	0.090326	0.721026	0.1420490744581854	CV_mean_number	4.342568737130753	0	NA	NA	NA	NA	NA	NA	NA	NA	NA
I	I:179651	179651	G	C	0.320635	0.0869699	0.0590768	0.14098	0.850842493768144	CV_mean_number	4.342568737130753	0	NA	NA	NA	NA	NA	NA	NA	NA	NA
I	I:180511	180511	T	A	0.0984127	-0.05584	0.0928308	0.54749	0.26162380887959036	CV_mean_number	4.342568737130753	0	NA	NA	NA	NA	NA	NA	NA	NA	NA
I	I:184470	184470	G	A	0.136508	0.195497	0.0798256	0.0143232	1.8439599438237817	CV_mean_number	4.342568737130753	0	NA	NA	NA	NA	NA	NA	NA	NA	NA
I	I:197167	197167	C	T	0.0730159	-0.0169197	0.106343	0.873587	0.058693837402928654	CV_mean_number	4.342568737130753	0	NA	NA	NA	NA	NA	NA	NA	NA	NA
I	I:257188	257188	C	T	0.0571429	-0.0990303	0.119066	0.405565	0.39193953139349785	CV_mean_number	4.342568737130753	0	NA	NA	NA	NA	NA	NA	NA	NA	NA
I	I:260562	260562	G	T	0.247619	0.107833	0.06381	0.091046	1.0407391296723285	CV_mean_number	4.342568737130753	0	NA	NA	NA	NA	NA	NA	NA	NA	NA
I	I:267874	267874	C	T	0.320635	0.0869699	0.0590768	0.14098	0.850842493768144	CV_mean_number	4.342568737130753	0	NA	NA	NA	NA	NA	NA	NA	NA	NA
I	I:275446	275446	T	A	0.126984	0.0729858	0.0829947	0.379183	0.42115114172345425	CV_mean_number	4.342568737130753	0	NA	NA	NA	NA	NA	NA	NA	NA	NA
I	I:276422	276422	T	G	0.11746	-0.0282066	0.0859181	0.742688	0.1291935931517047	CV_mean_number	4.342568737130753	0	NA	NA	NA	NA	NA	NA	NA	NA	NA
I	I:276696	276696	T	G	0.101587	0.0234184	0.0915734	0.798157	0.09791167315153608	CV_mean_number	4.342568737130753	0	NA	NA	NA	NA	NA	NA	NA	NA	NA
I	I:279038	279038	T	G	0.0730159	-0.0169197	0.106343	0.873587	0.058693837402928654	CV_mean_number	4.342568737130753	0	NA	NA	NA	NA	NA	NA	NA	NA	NA
I	I:304058	304058	C	T	0.247619	0.107833	0.06381	0.091046	1.0407391296723285	CV_mean_number	4.342568737130753	0	NA	NA	NA	NA	NA	NA	NA	NA	NA
I	I:314248	314248	A	G	0.0603175	-0.0650357	0.116156	0.575549	0.2399176963196436	CV_mean_number	4.342568737130753	0	NA	NA	NA	NA	NA	NA	NA	NA	NA
I	I:314355	314355	G	A	0.320635	0.0869699	0.0590768	0.14098	0.850842493768144	CV_mean_number	4.342568737130753	0	NA	NA	NA	NA	NA	NA	NA	NA	NA
I	I:315919	315919	A	G	0.257143	-0.0561613	0.0632245	0.374388	0.42667807985194195	CV_mean_number	4.342568737130753	0	NA	NA	NA	NA	NA	NA	NA	NA	NA
I	I:321873	321873	A	G	0.104762	0.0322544	0.090326	0.721026	0.1420490744581854	CV_mean_number	4.342568737130753	0	NA	NA	NA	NA	NA	NA	NA	NA	NA
I	I:345738	345738	A	C	0.0730159	-0.0169197	0.106343	0.873587	0.058693837402928654	CV_mean_number	4.342568737130753	0	NA	NA	NA	NA	NA	NA	NA	NA	NA
I	I:370339	370339	C	T	0.136508	0.195497	0.0798256	0.0143232	1.8439599438237817	CV_mean_number	4.342568737130753	0	NA	NA	NA	NA	NA	NA	NA	NA	NA
I	I:378499	378499	G	T	0.209524	0.107309	0.0677136	0.113024	0.9468293267745631	CV_mean_number	4.342568737130753	0	NA	NA	NA	NA	NA	NA	NA	NA	NA
I	I:379448	379448	A	G	0.257143	0.075141	0.0631615	0.234178	0.6304539074164677	CV_mean_number	4.342568737130753	0	NA	NA	NA	NA	NA	NA	NA	NA	NA
I	I:390371	390371	T	A	0.355556	0.0971911	0.0575381	0.0911883	1.0400608806562472	CV_mean_number	4.342568737130753	0	NA	NA	NA	NA	NA	NA	NA	NA	NA
I	I:390716	390716	C	G	0.0634921	-0.0540834	0.113422	0.633482	0.19826572081484942	CV_mean_number	4.342568737130753	0	NA	NA	NA	NA	NA	NA	NA	NA	NA
I	I:414966	414966	G	T	0.314286	-0.0405225	0.0595549	0.496237	0.3043108573617584	CV_mean_number	4.342568737130753	0	NA	NA	NA	NA	NA	NA	NA	NA	NA
I	I:423052	423052	C	T	0.0698413	-0.0145629	0.108549	0.893276	0.049014334216260266	CV_mean_number	4.342568737130753	0	NA	NA	NA	NA	NA	NA	NA	NA	NA
I	I:427621	427621	A	G	0.149206	0.0285606	0.0776377	0.71297	0.1469287437926838	CV_mean_number	4.342568737130753	0	NA	NA	NA	NA	NA	NA	NA	NA	NA
I	I:437412	437412	G	T	0.209524	0.107309	0.0677136	0.113024	0.9468293267745631	CV_mean_number	4.342568737130753	0	NA	NA	NA	NA	NA	NA	NA	NA	NA
I	I:438177	438177	A	C	0.111111	0.0309195	0.0880206	0.725382	0.13943322542730313	CV_mean_number	4.342568737130753	0	NA	NA	NA	NA	NA	NA	NA	NA	NA
I	I:452643	452643	T	G	0.111111	-0.0985312	0.0878616	0.262102	0.581529665105861	CV_mean_number	4.342568737130753	0	NA	NA	NA	NA	NA	NA	NA	NA	NA
I	I:460162	460162	G	A	0.0698413	-0.0145629	0.108549	0.893276	0.049014334216260266	CV_mean_number	4.342568737130753	0	NA	NA	NA	NA	NA	NA	NA	NA	NA
I	I:463909	463909	G	C	0.161905	-0.0273642	0.0750937	0.715559	0.14535455153657248	CV_mean_number	4.342568737130753	0	NA	NA	NA	NA	NA	NA	NA	NA	NA
I	I:465493	465493	G	T	0.12381	-0.0394992	0.0839735	0.638086	0.19512078396160318	CV_mean_number	4.342568737130753	0	NA	NA	NA	NA	NA	NA	NA	NA	NA
I	I:466067	466067	C	T	0.136508	0.195497	0.0798256	0.0143232	1.8439599438237817	CV_mean_number	4.342568737130753	0	NA	NA	NA	NA	NA	NA	NA	NA	NA
I	I:476760	476760	T	G	0.0698413	-0.017403	0.108547	0.872624	0.05917284667325298	CV_mean_number	4.342568737130753	0	NA	NA	NA	NA	NA	NA	NA	NA	NA
I	I:486474	486474	C	T	0.209524	0.107309	0.0677136	0.113024	0.9468293267745631	CV_mean_number	4.342568737130753	0	NA	NA	NA	NA	NA	NA	NA	NA	NA
I	I:490260	490260	A	G	0.0603175	0.311633	0.114872	0.00667024	2.1758585395766312	CV_mean_number	4.342568737130753	0	NA	NA	NA	NA	NA	NA	NA	NA	NA
I	I:491763	491763	T	A	0.412698	0.0817182	0.0560084	0.144556	0.8399638776162036	CV_mean_number	4.342568737130753	0	NA	NA	NA	NA	NA	NA	NA	NA	NA
I	I:495881	495881	C	A	0.0603175	-0.0650357	0.116156	0.575549	0.2399176963196436	CV_mean_number	4.342568737130753	0	NA	NA	NA	NA	NA	NA	NA	NA	NA
I	I:497133	497133	T	C	0.0793651	0.00248898	0.102356	0.9806	0.008508111089840538	CV_mean_number	4.342568737130753	0	NA	NA	NA	NA	NA	NA	NA	NA	NA
I	I:500958	500958	T	C	0.165079	-0.023214	0.0745137	0.75539	0.12182876874540835	CV_mean_number	4.342568737130753	0	NA	NA	NA	NA	NA	NA	NA	NA	NA
I	I:502109	502109	T	A	0.126984	-0.0340193	0.083075	0.682172	0.1661061103391328	CV_mean_number	4.342568737130753	0	NA	NA	NA	NA	NA	NA	NA	NA	NA
I	I:510732	510732	G	T	0.219048	-0.0100681	0.0668921	0.88036	0.055339698256265585	CV_mean_number	4.342568737130753	0	NA	NA	NA	NA	NA	NA	NA	NA	NA
I	I:527116	527116	T	C	0.101587	0.0171094	0.0915778	0.851794	0.0696654234029941	CV_mean_number	4.342568737130753	0	NA	NA	NA	NA	NA	NA	NA	NA	NA
I	I:528981	528981	T	G	0.0634921	-0.0918389	0.113345	0.41779	0.3790419592738381	CV_mean_number	4.342568737130753	0	NA	NA	NA	NA	NA	NA	NA	NA	NA
I	I:530978	530978	T	C	0.222222	0.131144	0.0661363	0.0473744	1.324456277358209	CV_mean_number	4.342568737130753	0	NA	NA	NA	NA	NA	NA	NA	NA	NA
I	I:562960	562960	A	G	0.136508	0.195497	0.0798256	0.0143232	1.8439599438237817	CV_mean_number	4.342568737130753	0	NA	NA	NA	NA	NA	NA	NA	NA	NA
I	I:571535	571535	T	A	0.238095	0.103962	0.0646937	0.108058	0.9663430748960451	CV_mean_number	4.342568737130753	0	NA	NA	NA	NA	NA	NA	NA	NA	NA
I	I:595105	595105	C	G	0.0634921	-0.0765406	0.113381	0.499629	0.301352361782179	CV_mean_number	4.342568737130753	0	NA	NA	NA	NA	NA	NA	NA	NA	NA
I	I:603304	603304	A	T	0.0888889	0.00995662	0.09722	0.918429	0.03695441159556524	CV_mean_number	4.342568737130753	0	NA	NA	NA	NA	NA	NA	NA	NA	NA
I	I:614072	614072	T	C	0.0793651	-0.0672636	0.102285	0.510791	0.29175676349314	CV_mean_number	4.342568737130753	0	NA	NA	NA	NA	NA	NA	NA	NA	NA
I	I:630403	630403	G	A	0.285714	0.107168	0.0609447	0.0786725	1.104177048903531	CV_mean_number	4.342568737130753	0	NA	NA	NA	NA	NA	NA	NA	NA	NA
I	I:637363	637363	T	A	0.203175	-0.0245407	0.0687492	0.721122	0.14199125477487365	CV_mean_number	4.342568737130753	0	NA	NA	NA	NA	NA	NA	NA	NA	NA
I	I:639338	639338	T	A	0.142857	-0.0603331	0.0789933	0.445001	0.35163901307750906	CV_mean_number	4.342568737130753	0	NA	NA	NA	NA	NA	NA	NA	NA	NA
I	I:645306	645306	T	C	0.257143	0.111534	0.0629895	0.0766145	1.1156890283564063	CV_mean_number	4.342568737130753	0	NA	NA	NA	NA	NA	NA	NA	NA	NA
I	I:664603	664603	C	T	0.0666667	0.0609068	0.110864	0.582742	0.23452367984891886	CV_mean_number	4.342568737130753	0	NA	NA	NA	NA	NA	NA	NA	NA	NA
I	I:674446	674446	C	G	0.0603175	-0.0342566	0.116198	0.768138	0.11456074968909401	CV_mean_number	4.342568737130753	0	NA	NA	NA	NA	NA	NA	NA	NA	NA
I	I:675688	675688	T	A	0.0666667	-0.0695338	0.110848	0.530468	0.2753408093923995	CV_mean_number	4.342568737130753	0	NA	NA	NA	NA	NA	NA	NA	NA	NA
I	I:675746	675746	A	C	0.177778	-0.00306072	0.0723665	0.966264	0.014904200624770434	CV_mean_number	4.342568737130753	0	NA	NA	NA	NA	NA	NA	NA	NA	NA
I	I:681905	681905	T	A	0.0539683	-0.100603	0.122315	0.410798	0.38637167946394685	CV_mean_number	4.342568737130753	0	NA	NA	NA	NA	NA	NA	NA	NA	NA
I	I:694829	694829	A	G	0.193651	-0.0533561	0.0699516	0.445608	0.35104702087591755	CV_mean_number	4.342568737130753	0	NA	NA	NA	NA	NA	NA	NA	NA	NA
I	I:695386	695386	T	C	0.152381	-0.026277	0.0769707	0.73281	0.13500861287297522	CV_mean_number	4.342568737130753	0	NA	NA	NA	NA	NA	NA	NA	NA	NA
I	I:695452	695452	C	T	0.273016	-0.00876697	0.0621015	0.887734	0.05171714642632419	CV_mean_number	4.342568737130753	0	NA	NA	NA	NA	NA	NA	NA	NA	NA
I	I:703316	703316	A	G	0.190476	-0.0529531	0.0703955	0.451917	0.34494132127706245	CV_mean_number	4.342568737130753	0	NA	NA	NA	NA	NA	NA	NA	NA	NA
I	I:716699	716699	T	A	0.0698413	-0.0145629	0.108549	0.893276	0.049014334216260266	CV_mean_number	4.342568737130753	0	NA	NA	NA	NA	NA	NA	NA	NA	NA
I	I:719322	719322	A	G	0.130159	-0.0315251	0.0822079	0.701364	0.15405652959023397	CV_mean_number	4.342568737130753	0	NA	NA	NA	NA	NA	NA	NA	NA	NA
I	I:727377	727377	A	G	0.133333	0.0152259	0.0813865	0.851597	0.06976587716060628	CV_mean_number	4.342568737130753	0	NA	NA	NA	NA	NA	NA	NA	NA	NA
I	I:730439	730439	T	C	0.0793651	-0.0531363	0.102312	0.603513	0.2193133705252779	CV_mean_number	4.342568737130753	0	NA	NA	NA	NA	NA	NA	NA	NA	NA
I	I:734890	734890	A	G	0.0952381	-0.0298627	0.0942389	0.751332	0.1241681137191883	CV_mean_number	4.342568737130753	0	NA	NA	NA	NA	NA	NA	NA	NA	NA
I	I:736799	736799	T	C	0.0507937	-0.0482334	0.125975	0.701809	0.153781066691609	CV_mean_number	4.342568737130753	0	NA	NA	NA	NA	NA	NA	NA	NA	NA
I	I:736943	736943	G	T	0.206349	0.111741	0.0680761	0.100711	0.9969230917264393	CV_mean_number	4.342568737130753	0	NA	NA	NA	NA	NA	NA	NA	NA	NA
I	I:744972	744972	C	T	0.0603175	0.00311556	0.116214	0.978612	0.009389463109260494	CV_mean_number	4.342568737130753	0	NA	NA	NA	NA	NA	NA	NA	NA	NA
I	I:756171	756171	G	A	0.0888889	-0.127304	0.096955	0.189174	0.7231385530951898	CV_mean_number	4.342568737130753	0	NA	NA	NA	NA	NA	NA	NA	NA	NA
I	I:758742	758742	C	T	0.0634921	-0.0623263	0.113409	0.582614	0.23461908364639733	CV_mean_number	4.342568737130753	0	NA	NA	NA	NA	NA	NA	NA	NA	NA
I	I:760581	760581	G	C	0.0698413	-0.0145629	0.108549	0.893276	0.049014334216260266	CV_mean_number	4.342568737130753	0	NA	NA	NA	NA	NA	NA	NA	NA	NA
I	I:761505	761505	G	T	0.168254	0.0262217	0.0739447	0.72288	0.14093379075973103	CV_mean_number	4.342568737130753	0	NA	NA	NA	NA	NA	NA	NA	NA	NA
I	I:762356	762356	T	G	0.107937	0.0207852	0.0891564	0.815659	0.0884913674357227	CV_mean_number	4.342568737130753	0	NA	NA	NA	NA	NA	NA	NA	NA	NA
I	I:780481	780481	G	T	0.206349	0.111741	0.0680761	0.100711	0.9969230917264393	CV_mean_number	4.342568737130753	0	NA	NA	NA	NA	NA	NA	NA	NA	NA
I	I:781111	781111	T	C	0.0539683	-0.0583837	0.122403	0.633377	0.19833771133740047	CV_mean_number	4.342568737130753	0	NA	NA	NA	NA	NA	NA	NA	NA	NA
I	I:782297	782297	C	G	0.28254	-0.0345808	0.0614206	0.573423	0.2415248914858785	CV_mean_number	4.342568737130753	0	NA	NA	NA	NA	NA	NA	NA	NA	NA
I	I:783283	783283	T	C	0.339683	0.089431	0.0582006	0.124391	0.9052110408006184	CV_mean_number	4.342568737130753	0	NA	NA	NA	NA	NA	NA	NA	NA	NA
I	I:786475	786475	C	T	0.0507937	0.0177571	0.126001	0.887926	0.05162322693627498	CV_mean_number	4.342568737130753	0	NA	NA	NA	NA	NA	NA	NA	NA	NA
I	I:788966	788966	A	G	0.0698413	-0.0145629	0.108549	0.893276	0.049014334216260266	CV_mean_number	4.342568737130753	0	NA	NA	NA	NA	NA	NA	NA	NA	NA
I	I:803754	803754	G	C	0.0507937	-0.0482334	0.125975	0.701809	0.153781066691609	CV_mean_number	4.342568737130753	0	NA	NA	NA	NA	NA	NA	NA	NA	NA
I	I:807505	807505	T	A	0.215873	-0.0581418	0.0671677	0.386698	0.41262807408987734	CV_mean_number	4.342568737130753	0	NA	NA	NA	NA	NA	NA	NA	NA	NA
I	I:811002	811002	T	C	0.0634921	-0.0623263	0.113409	0.582614	0.23461908364639733	CV_mean_number	4.342568737130753	0	NA	NA	NA	NA	NA	NA	NA	NA	NA
I	I:816631	816631	A	T	0.0920635	0.00434826	0.0956972	0.963758	0.01603200391744819	CV_mean_number	4.342568737130753	0	NA	NA	NA	NA	NA	NA	NA	NA	NA
I	I:819510	819510	C	A	0.139683	-0.0052929	0.0798121	0.947125	0.023592699742515044	CV_mean_number	4.342568737130753	0	NA	NA	NA	NA	NA	NA	NA	NA	NA
I	I:820625	820625	C	T	0.114286	-0.00389391	0.0869617	0.964285	0.015794588882967305	CV_mean_number	4.342568737130753	0	NA	NA	NA	NA	NA	NA	NA	NA	NA
I	I:824619	824619	T	C	0.228571	0.0773382	0.0657439	0.239453	0.6207797175051318	CV_mean_number	4.342568737130753	0	NA	NA	NA	NA	NA	NA	NA	NA	NA
I	I:835423	835423	A	T	0.260317	-0.0408577	0.0630096	0.516702	0.28675985742611537	CV_mean_number	4.342568737130753	0	NA	NA	NA	NA	NA	NA	NA	NA	NA
I	I:836363	836363	T	C	0.48254	0.0608061	0.0552623	0.271193	0.5667215246154751	CV_mean_number	4.342568737130753	0	NA	NA	NA	NA	NA	NA	NA	NA	NA
I	I:839222	839222	G	A	0.101587	-0.0870622	0.0914506	0.34109	0.4671310129540251	CV_mean_number	4.342568737130753	0	NA	NA	NA	NA	NA	NA	NA	NA	NA
I	I:846665	846665	T	C	0.320635	0.089342	0.0590655	0.130383	0.8847790304406663	CV_mean_number	4.342568737130753	0	NA	NA	NA	NA	NA	NA	NA	NA	NA
I	I:847638	847638	T	C	0.285714	-0.072131	0.0611091	0.237855	0.6236877147524424	CV_mean_number	4.342568737130753	0	NA	NA	NA	NA	NA	NA	NA	NA	NA
I	I:847650	847650	C	T	0.0761905	-0.0101394	0.104286	0.922546	0.03501196983220941	CV_mean_number	4.342568737130753	0	NA	NA	NA	NA	NA	NA	NA	NA	NA
I	I:850499	850499	G	A	0.212698	0.0302236	0.0675898	0.654758	0.18391918654972553	CV_mean_number	4.342568737130753	0	NA	NA	NA	NA	NA	NA	NA	NA	NA
I	I:868535	868535	A	T	0.0507937	0.0351092	0.125989	0.780499	0.10762764903303082	CV_mean_number	4.342568737130753	0	NA	NA	NA	NA	NA	NA	NA	NA	NA
I	I:873273	873273	G	C	0.0634921	0.0609693	0.113411	0.590857	0.22851761493188488	CV_mean_number	4.342568737130753	0	NA	NA	NA	NA	NA	NA	NA	NA	NA
I	I:874770	874770	T	C	0.155556	0.06392	0.076253	0.401883	0.3959003644532598	CV_mean_number	4.342568737130753	0	NA	NA	NA	NA	NA	NA	NA	NA	NA
I	I:875746	875746	G	A	0.184127	-0.00762634	0.0713829	0.914918	0.0386178280574282	CV_mean_number	4.342568737130753	0	NA	NA	NA	NA	NA	NA	NA	NA	NA
I	I:875953	875953	T	G	0.111111	0.0090517	0.0880364	0.918108	0.03710622833556078	CV_mean_number	4.342568737130753	0	NA	NA	NA	NA	NA	NA	NA	NA	NA
I	I:876547	876547	A	G	0.0730159	-0.0530536	0.106305	0.617731	0.20920060363054507	CV_mean_number	4.342568737130753	0	NA	NA	NA	NA	NA	NA	NA	NA	NA
I	I:881269	881269	G	T	0.111111	0.0247581	0.0880268	0.778513	0.10873413096853136	CV_mean_number	4.342568737130753	0	NA	NA	NA	NA	NA	NA	NA	NA	NA
I	I:884389	884389	T	G	0.136508	0.195497	0.0798256	0.0143232	1.8439599438237817	CV_mean_number	4.342568737130753	0	NA	NA	NA	NA	NA	NA	NA	NA	NA
I	I:889157	889157	T	C	0.209524	0.112056	0.067689	0.0978318	1.0095199558490522	CV_mean_number	4.342568737130753	0	NA	NA	NA	NA	NA	NA	NA	NA	NA
I	I:912022	912022	T	C	0.104762	-0.108978	0.0901342	0.226639	0.6446653547223528	CV_mean_number	4.342568737130753	0	NA	NA	NA	NA	NA	NA	NA	NA	NA
I	I:913928	913928	G	A	0.279365	0.0885498	0.0614601	0.14965	0.8249232788237898	CV_mean_number	4.342568737130753	0	NA	NA	NA	NA	NA	NA	NA	NA	NA
I	I:917584	917584	C	T	0.0793651	-0.0246275	0.102347	0.809843	0.0915991673466478	CV_mean_number	4.342568737130753	0	NA	NA	NA	NA	NA	NA	NA	NA	NA
I	I:922115	922115	G	A	0.12381	-0.00304109	0.084003	0.971121	0.012726654377909052	CV_mean_number	4.342568737130753	0	NA	NA	NA	NA	NA	NA	NA	NA	NA
I	I:926730	926730	A	T	0.187302	-0.037365	0.0708833	0.5981	0.223226197587893	CV_mean_number	4.342568737130753	0	NA	NA	NA	NA	NA	NA	NA	NA	NA
I	I:951158	951158	A	G	0.120635	0.00552401	0.084947	0.948151	0.02312249257273093	CV_mean_number	4.342568737130753	0	NA	NA	NA	NA	NA	NA	NA	NA	NA
I	I:973119	973119	C	T	0.257143	-0.0415301	0.0632606	0.511508	0.2911475695203732	CV_mean_number	4.342568737130753	0	NA	NA	NA	NA	NA	NA	NA	NA	NA
I	I:975649	975649	T	C	0.295238	-0.0362985	0.06062	0.549315	0.2601785416517086	CV_mean_number	4.342568737130753	0	NA	NA	NA	NA	NA	NA	NA	NA	NA
I	I:978053	978053	G	T	0.139683	0.19222	0.0790697	0.0150562	1.8222846248998497	CV_mean_number	4.342568737130753	0	NA	NA	NA	NA	NA	NA	NA	NA	NA
I	I:984961	984961	C	G	0.44127	0.0623671	0.0556094	0.262066	0.5815893200308968	CV_mean_number	4.342568737130753	0	NA	NA	NA	NA	NA	NA	NA	NA	NA
I	I:986279	986279	G	A	0.374603	0.034433	0.057129	0.546692	0.26225728129643633	CV_mean_number	4.342568737130753	0	NA	NA	NA	NA	NA	NA	NA	NA	NA
I	I:986339	986339	C	A	0.298413	0.0608537	0.0603697	0.313446	0.5038372679817043	CV_mean_number	4.342568737130753	0	NA	NA	NA	NA	NA	NA	NA	NA	NA
I	I:991525	991525	C	A	0.0507937	0.0739482	0.125935	0.557075	0.254086331049924	CV_mean_number	4.342568737130753	0	NA	NA	NA	NA	NA	NA	NA	NA	NA
I	I:992266	992266	T	A	0.393651	0.0651499	0.0565113	0.248965	0.6038617026041087	CV_mean_number	4.342568737130753	0	NA	NA	NA	NA	NA	NA	NA	NA	NA
I	I:992525	992525	G	A	0.257143	0.0100982	0.0633016	0.873255	0.058858919041368724	CV_mean_number	4.342568737130753	0	NA	NA	NA	NA	NA	NA	NA	NA	NA
I	I:992871	992871	A	G	0.260317	0.0908194	0.0628425	0.148404	0.8285543931640271	CV_mean_number	4.342568737130753	0	NA	NA	NA	NA	NA	NA	NA	NA	NA
I	I:993801	993801	A	T	0.155556	0.0264532	0.0763239	0.728899	0.13733264559358224	CV_mean_number	4.342568737130753	0	NA	NA	NA	NA	NA	NA	NA	NA	NA
I	I:995908	995908	T	C	0.488889	-0.068824	0.0552121	0.212566	0.6725061997997209	CV_mean_number	4.342568737130753	0	NA	NA	NA	NA	NA	NA	NA	NA	NA
I	I:997360	997360	T	G	0.111111	0.00264417	0.0880378	0.97604	0.010532383743854517	CV_mean_number	4.342568737130753	0	NA	NA	NA	NA	NA	NA	NA	NA	NA
I	I:1003648	1003648	G	A	0.174603	-0.00224873	0.072881	0.975385	0.01082392750938936	CV_mean_number	4.342568737130753	0	NA	NA	NA	NA	NA	NA	NA	NA	NA
I	I:1004131	1004131	T	A	0.0793651	0.00647983	0.102355	0.949522	0.022494968401513934	CV_mean_number	4.342568737130753	0	NA	NA	NA	NA	NA	NA	NA	NA	NA
I	I:1006934	1006934	T	G	0.266667	0.0950521	0.0623347	0.127292	0.8951988898658296	CV_mean_number	4.342568737130753	0	NA	NA	NA	NA	NA	NA	NA	NA	NA
I	I:1033036	1033036	T	C	0.107937	0.0144555	0.0891604	0.871204	0.05988013925097337	CV_mean_number	4.342568737130753	0	NA	NA	NA	NA	NA	NA	NA	NA	NA
I	I:1038911	1038911	G	A	0.368254	0.0670264	0.0572371	0.241587	0.6169264391741069	CV_mean_number	4.342568737130753	0	NA	NA	NA	NA	NA	NA	NA	NA	NA
I	I:1054537	1054537	C	T	0.0539683	-0.100603	0.122315	0.410798	0.38637167946394685	CV_mean_number	4.342568737130753	0	NA	NA	NA	NA	NA	NA	NA	NA	NA
I	I:1059258	1059258	C	T	0.174603	0.0633178	0.0727931	0.384393	0.41522452966388174	CV_mean_number	4.342568737130753	0	NA	NA	NA	NA	NA	NA	NA	NA	NA
I	I:1059264	1059264	T	C	0.190476	-0.0430205	0.0704171	0.54124	0.2666101146292277	CV_mean_number	4.342568737130753	0	NA	NA	NA	NA	NA	NA	NA	NA	NA
I	I:1062436	1062436	A	T	0.0920635	-0.0410563	0.0956694	0.667816	0.17534318002787636	CV_mean_number	4.342568737130753	0	NA	NA	NA	NA	NA	NA	NA	NA	NA
I	I:1068572	1068572	T	C	0.142857	0.18785	0.0783507	0.016505	1.7823844713336698	CV_mean_number	4.342568737130753	0	NA	NA	NA	NA	NA	NA	NA	NA	NA
I	I:1071327	1071327	A	G	0.133333	-0.138543	0.0810135	0.0872437	1.059265924300255	CV_mean_number	4.342568737130753	0	NA	NA	NA	NA	NA	NA	NA	NA	NA
I	I:1071437	1071437	A	G	0.0666667	-0.171048	0.110495	0.121619	0.9149985718513806	CV_mean_number	4.342568737130753	0	NA	NA	NA	NA	NA	NA	NA	NA	NA
I	I:1086755	1086755	A	C	0.457143	0.0315394	0.0555111	0.569924	0.2441830541191676	CV_mean_number	4.342568737130753	0	NA	NA	NA	NA	NA	NA	NA	NA	NA
I	I:1086960	1086960	G	T	0.0730159	-0.0420077	0.106321	0.692767	0.15941280814319755	CV_mean_number	4.342568737130753	0	NA	NA	NA	NA	NA	NA	NA	NA	NA
I	I:1087239	1087239	T	C	0.0571429	-0.0138181	0.119195	0.90771	0.04205288002127338	CV_mean_number	4.342568737130753	0	NA	NA	NA	NA	NA	NA	NA	NA	NA
I	I:1088775	1088775	A	G	0.0920635	-0.103234	0.0955195	0.2798	0.5531522898441912	CV_mean_number	4.342568737130753	0	NA	NA	NA	NA	NA	NA	NA	NA	NA
I	I:1089080	1089080	C	T	0.184127	-0.0802863	0.0712398	0.259748	0.5854477877257716	CV_mean_number	4.342568737130753	0	NA	NA	NA	NA	NA	NA	NA	NA	NA
I	I:1090252	1090252	C	T	0.269841	0.0987098	0.0620815	0.111834	0.9514261412835789	CV_mean_number	4.342568737130753	0	NA	NA	NA	NA	NA	NA	NA	NA	NA
I	I:1095862	1095862	T	A	0.149206	-0.0328987	0.0776322	0.671729	0.17280590186044908	CV_mean_number	4.342568737130753	0	NA	NA	NA	NA	NA	NA	NA	NA	NA
I	I:1096611	1096611	A	T	0.184127	0.00890675	0.0713824	0.900702	0.04541887290851371	CV_mean_number	4.342568737130753	0	NA	NA	NA	NA	NA	NA	NA	NA	NA
I	I:1099042	1099042	A	G	0.244444	-0.0384356	0.064343	0.550271	0.25942337447185954	CV_mean_number	4.342568737130753	0	NA	NA	NA	NA	NA	NA	NA	NA	NA
I	I:1099355	1099355	G	A	0.292063	-0.0454141	0.0607924	0.455042	0.34194851647161595	CV_mean_number	4.342568737130753	0	NA	NA	NA	NA	NA	NA	NA	NA	NA
I	I:1103626	1103626	A	C	0.0761905	0.00217055	0.104287	0.983395	0.00727200417879388	CV_mean_number	4.342568737130753	0	NA	NA	NA	NA	NA	NA	NA	NA	NA
I	I:1109928	1109928	G	A	0.184127	-0.0294115	0.0713649	0.680245	0.16733464172812382	CV_mean_number	4.342568737130753	0	NA	NA	NA	NA	NA	NA	NA	NA	NA
I	I:1110623	1110623	G	A	0.111111	-0.0115295	0.0880355	0.895804	0.04778700264814147	CV_mean_number	4.342568737130753	0	NA	NA	NA	NA	NA	NA	NA	NA	NA
I	I:1127333	1127333	A	T	0.0730159	-0.0636227	0.106287	0.549443	0.2600773552322512	CV_mean_number	4.342568737130753	0	NA	NA	NA	NA	NA	NA	NA	NA	NA
I	I:1128847	1128847	G	C	0.161905	0.123203	0.0747861	0.0994742	1.0022895448881095	CV_mean_number	4.342568737130753	0	NA	NA	NA	NA	NA	NA	NA	NA	NA
I	I:1128934	1128934	T	C	0.273016	-0.00469512	0.0621029	0.939736	0.02699413559875931	CV_mean_number	4.342568737130753	0	NA	NA	NA	NA	NA	NA	NA	NA	NA
I	I:1129124	1129124	A	G	0.0920635	-0.0410563	0.0956694	0.667816	0.17534318002787636	CV_mean_number	4.342568737130753	0	NA	NA	NA	NA	NA	NA	NA	NA	NA
I	I:1130709	1130709	A	T	0.0603175	-0.0166485	0.116211	0.886084	0.05252510541853161	CV_mean_number	4.342568737130753	0	NA	NA	NA	NA	NA	NA	NA	NA	NA
I	I:1137920	1137920	A	C	0.266667	0.0548007	0.0624891	0.380506	0.41963849067699094	CV_mean_number	4.342568737130753	0	NA	NA	NA	NA	NA	NA	NA	NA	NA
I	I:1138155	1138155	A	G	0.196825	0.0873074	0.0694116	0.208456	0.6809856000368918	CV_mean_number	4.342568737130753	0	NA	NA	NA	NA	NA	NA	NA	NA	NA
I	I:1140126	1140126	G	A	0.0857143	0.105607	0.0986532	0.284399	0.5460719350000963	CV_mean_number	4.342568737130753	0	NA	NA	NA	NA	NA	NA	NA	NA	NA
I	I:1140583	1140583	T	C	0.187302	0.0105958	0.0709123	0.881221	0.05491516191227145	CV_mean_number	4.342568737130753	0	NA	NA	NA	NA	NA	NA	NA	NA	NA
I	I:1141172	1141172	A	G	0.193651	-0.034697	0.0699891	0.620072	0.20755787923205832	CV_mean_number	4.342568737130753	0	NA	NA	NA	NA	NA	NA	NA	NA	NA
I	I:1141367	1141367	A	C	0.0666667	0.136025	0.110651	0.218952	0.6596510834245993	CV_mean_number	4.342568737130753	0	NA	NA	NA	NA	NA	NA	NA	NA	NA
I	I:1146873	1146873	T	G	0.311111	0.0328924	0.0597351	0.581883	0.2351643307496041	CV_mean_number	4.342568737130753	0	NA	NA	NA	NA	NA	NA	NA	NA	NA
I	I:1149835	1149835	T	A	0.311111	-0.0173121	0.059756	0.772035	0.11236301059391346	CV_mean_number	4.342568737130753	0	NA	NA	NA	NA	NA	NA	NA	NA	NA
I	I:1156845	1156845	G	A	0.130159	0.20747	0.0813867	0.0107973	1.966684831707491	CV_mean_number	4.342568737130753	0	NA	NA	NA	NA	NA	NA	NA	NA	NA
I	I:1157239	1157239	A	T	0.47619	0.108763	0.055056	0.0482114	1.3168502569541096	CV_mean_number	4.342568737130753	0	NA	NA	NA	NA	NA	NA	NA	NA	NA
I	I:1157254	1157254	A	T	0.253968	-0.00130205	0.0635629	0.983657	0.007156313129516565	CV_mean_number	4.342568737130753	0	NA	NA	NA	NA	NA	NA	NA	NA	NA
I	I:1158457	1158457	T	G	0.15873	0.119274	0.075413	0.113737	0.9440982311623496	CV_mean_number	4.342568737130753	0	NA	NA	NA	NA	NA	NA	NA	NA	NA
I	I:1159684	1159684	A	T	0.149206	-0.0155106	0.0776495	0.841675	0.07485557234090362	CV_mean_number	4.342568737130753	0	NA	NA	NA	NA	NA	NA	NA	NA	NA
I	I:1159972	1159972	G	T	0.434921	0.0445226	0.0557533	0.424543	0.3720783155096522	CV_mean_number	4.342568737130753	0	NA	NA	NA	NA	NA	NA	NA	NA	NA
I	I:1161838	1161838	G	A	0.0698413	0.0691421	0.108482	0.523889	0.28076072025687143	CV_mean_number	4.342568737130753	0	NA	NA	NA	NA	NA	NA	NA	NA	NA
I	I:1161993	1161993	A	C	0.48254	0.0807877	0.0551804	0.143176	0.8441297749129726	CV_mean_number	4.342568737130753	0	NA	NA	NA	NA	NA	NA	NA	NA	NA
I	I:1166270	1166270	T	C	0.0539683	0.0587954	0.122402	0.630982	0.19998302968165824	CV_mean_number	4.342568737130753	0	NA	NA	NA	NA	NA	NA	NA	NA	NA
I	I:1166365	1166365	G	C	0.304762	0.081009	0.0599323	0.17648	0.7533045049038847	CV_mean_number	4.342568737130753	0	NA	NA	NA	NA	NA	NA	NA	NA	NA
I	I:1168888	1168888	A	C	0.196825	-0.0189933	0.0695785	0.784871	0.10520171725718667	CV_mean_number	4.342568737130753	0	NA	NA	NA	NA	NA	NA	NA	NA	NA
I	I:1169002	1169002	T	G	0.285714	0.029153599999999998	0.0612228	0.63394	0.19795184448735997	CV_mean_number	4.342568737130753	0	NA	NA	NA	NA	NA	NA	NA	NA	NA
I	I:1171014	1171014	T	A	0.0761905	-0.0184482	0.104282	0.859581	0.06571319262958364	CV_mean_number	4.342568737130753	0	NA	NA	NA	NA	NA	NA	NA	NA	NA
I	I:1171021	1171021	A	G	0.457143	0.0391463	0.0554956	0.480564	0.3182487661724503	CV_mean_number	4.342568737130753	0	NA	NA	NA	NA	NA	NA	NA	NA	NA
I	I:1178087	1178087	G	C	0.0539683	-0.0316555	0.122434	0.795982	0.09909675310286133	CV_mean_number	4.342568737130753	0	NA	NA	NA	NA	NA	NA	NA	NA	NA
I	I:1178132	1178132	G	A	0.314286	0.0557579	0.0595155	0.348829	0.45738741704097463	CV_mean_number	4.342568737130753	0	NA	NA	NA	NA	NA	NA	NA	NA	NA
I	I:1178358	1178358	T	C	0.0984127	0.0360963	0.092862	0.697492	0.1564607692382788	CV_mean_number	4.342568737130753	0	NA	NA	NA	NA	NA	NA	NA	NA	NA
I	I:1180491	1180491	T	A	0.238095	0.101271	0.0647074	0.11757	0.9297034818022349	CV_mean_number	4.342568737130753	0	NA	NA	NA	NA	NA	NA	NA	NA	NA
I	I:1182911	1182911	C	A	0.0507937	0.0604811	0.125958	0.631109	0.19989562647636183	CV_mean_number	4.342568737130753	0	NA	NA	NA	NA	NA	NA	NA	NA	NA
I	I:1184704	1184704	A	C	0.0730159	0.193748	0.105782	0.0670146	1.173830570303893	CV_mean_number	4.342568737130753	0	NA	NA	NA	NA	NA	NA	NA	NA	NA
I	I:1184715	1184715	T	C	0.0603175	0.0625373	0.116161	0.590322	0.22891103127895351	CV_mean_number	4.342568737130753	0	NA	NA	NA	NA	NA	NA	NA	NA	NA
I	I:1184732	1184732	T	A	0.0666667	-0.0836217	0.110817	0.450491	0.3463138810209466	CV_mean_number	4.342568737130753	0	NA	NA	NA	NA	NA	NA	NA	NA	NA
I	I:1184934	1184934	C	T	0.0761905	0.0143249	0.104284	0.890743	0.05024758191359417	CV_mean_number	4.342568737130753	0	NA	NA	NA	NA	NA	NA	NA	NA	NA
I	I:1199350	1199350	T	A	0.0857143	-0.0447134	0.0988013	0.650867	0.1865077473261722	CV_mean_number	4.342568737130753	0	NA	NA	NA	NA	NA	NA	NA	NA	NA
I	I:1200305	1200305	C	T	0.0984127	0.0162044	0.0928799	0.861499	0.06474522233055974	CV_mean_number	4.342568737130753	0	NA	NA	NA	NA	NA	NA	NA	NA	NA
I	I:1207262	1207262	C	T	0.307937	0.0812887	0.059757	0.173728	0.7601301800244142	CV_mean_number	4.342568737130753	0	NA	NA	NA	NA	NA	NA	NA	NA	NA
I	I:1219286	1219286	T	A	0.0857143	0.0566514	0.0987817	0.566305	0.2469496038991228	CV_mean_number	4.342568737130753	0	NA	NA	NA	NA	NA	NA	NA	NA	NA
I	I:1219399	1219399	C	T	0.307937	0.0812887	0.059757	0.173728	0.7601301800244142	CV_mean_number	4.342568737130753	0	NA	NA	NA	NA	NA	NA	NA	NA	NA
I	I:1224025	1224025	A	G	0.0634921	0.1135	0.113282	0.316382	0.4997882328957449	CV_mean_number	4.342568737130753	0	NA	NA	NA	NA	NA	NA	NA	NA	NA
I	I:1228772	1228772	T	C	0.0952381	-0.0377069	0.0942299	0.68904	0.161755565791888	CV_mean_number	4.342568737130753	0	NA	NA	NA	NA	NA	NA	NA	NA	NA
I	I:1229336	1229336	G	T	0.174603	0.0165592	0.0728751	0.820247	0.08605534934280264	CV_mean_number	4.342568737130753	0	NA	NA	NA	NA	NA	NA	NA	NA	NA
I	I:1229366	1229366	C	T	0.130159	0.00795315	0.082226	0.922946	0.03482370806192631	CV_mean_number	4.342568737130753	0	NA	NA	NA	NA	NA	NA	NA	NA	NA
I	I:1229646	1229646	A	T	0.0571429	0.0523994	0.119161	0.660128	0.180371845815912	CV_mean_number	4.342568737130753	0	NA	NA	NA	NA	NA	NA	NA	NA	NA
I	I:1232339	1232339	T	C	0.48254	0.0789364	0.055189	0.152633	0.8163515596413125	CV_mean_number	4.342568737130753	0	NA	NA	NA	NA	NA	NA	NA	NA	NA
I	I:1233659	1233659	T	C	0.0730159	-0.204706	0.105716	0.052822	1.2771851591207664	CV_mean_number	4.342568737130753	0	NA	NA	NA	NA	NA	NA	NA	NA	NA
I	I:1247844	1247844	C	T	0.479365	0.0418497	0.0553319	0.449446	0.3473224803730548	CV_mean_number	4.342568737130753	0	NA	NA	NA	NA	NA	NA	NA	NA	NA
I	I:1247991	1247991	G	T	0.0507937	0.11679	0.125832	0.353334	0.4518145700321145	CV_mean_number	4.342568737130753	0	NA	NA	NA	NA	NA	NA	NA	NA	NA
I	I:1248064	1248064	T	C	0.371429	0.0898922	0.0570349	0.115005	0.9392832776880843	CV_mean_number	4.342568737130753	0	NA	NA	NA	NA	NA	NA	NA	NA	NA
I	I:1248756	1248756	A	G	0.0920635	-0.0752725	0.0956029	0.43108	0.3654421258149273	CV_mean_number	4.342568737130753	0	NA	NA	NA	NA	NA	NA	NA	NA	NA
I	I:1251884	1251884	T	C	0.12381	-0.0858096	0.0838631	0.306208	0.513983467098015	CV_mean_number	4.342568737130753	0	NA	NA	NA	NA	NA	NA	NA	NA	NA
I	I:1252221	1252221	A	G	0.0634921	-0.0608132	0.113412	0.591808	0.22781916838732877	CV_mean_number	4.342568737130753	0	NA	NA	NA	NA	NA	NA	NA	NA	NA
I	I:1255890	1255890	T	C	0.142857	-0.0716573	0.0789631	0.364154	0.438714915234943	CV_mean_number	4.342568737130753	0	NA	NA	NA	NA	NA	NA	NA	NA	NA
I	I:1256240	1256240	G	A	0.247619	-0.0658515	0.0639923	0.303455	0.5179057022845048	CV_mean_number	4.342568737130753	0	NA	NA	NA	NA	NA	NA	NA	NA	NA
I	I:1258563	1258563	C	G	0.101587	-0.0357695	0.0915606	0.696045	0.15736268191253167	CV_mean_number	4.342568737130753	0	NA	NA	NA	NA	NA	NA	NA	NA	NA
I	I:1258706	1258706	G	A	0.304762	0.097883	0.0598518	0.10196	0.9915701732027701	CV_mean_number	4.342568737130753	0	NA	NA	NA	NA	NA	NA	NA	NA	NA
I	I:1260822	1260822	A	G	0.136508	0.211962	0.0796913	0.00781886	2.106856563027162	CV_mean_number	4.342568737130753	0	NA	NA	NA	NA	NA	NA	NA	NA	NA
I	I:1262797	1262797	C	T	0.47619	0.0445006	0.055341	0.42133	0.37537761666095326	CV_mean_number	4.342568737130753	0	NA	NA	NA	NA	NA	NA	NA	NA	NA
I	I:1265967	1265967	A	G	0.114286	-0.0730325	0.0868639	0.400477	0.397422421052686	CV_mean_number	4.342568737130753	0	NA	NA	NA	NA	NA	NA	NA	NA	NA
I	I:1266023	1266023	T	A	0.0603175	-0.0012472	0.116214	0.991437	0.0037348774462152966	CV_mean_number	4.342568737130753	0	NA	NA	NA	NA	NA	NA	NA	NA	NA
I	I:1267574	1267574	G	A	0.260317	0.0762485	0.0629044	0.225461	0.6469285710792521	CV_mean_number	4.342568737130753	0	NA	NA	NA	NA	NA	NA	NA	NA	NA
I	I:1269245	1269245	T	A	0.304762	0.0956068	0.0598636	0.110248	0.9576292802895321	CV_mean_number	4.342568737130753	0	NA	NA	NA	NA	NA	NA	NA	NA	NA
I	I:1269603	1269603	A	T	0.180952	-0.0538822	0.0718034	0.453006	0.3438960457804687	CV_mean_number	4.342568737130753	0	NA	NA	NA	NA	NA	NA	NA	NA	NA
I	I:1274869	1274869	C	A	0.0634921	-0.0202842	0.113458	0.858109	0.06645754304654525	CV_mean_number	4.342568737130753	0	NA	NA	NA	NA	NA	NA	NA	NA	NA
I	I:1277122	1277122	T	C	0.415873	0.0506846	0.0560624	0.365956	0.43657112800974684	CV_mean_number	4.342568737130753	0	NA	NA	NA	NA	NA	NA	NA	NA	NA
I	I:1279436	1279436	C	T	0.0984127	-0.0547335	0.0928329	0.555464	0.25534408273208237	CV_mean_number	4.342568737130753	0	NA	NA	NA	NA	NA	NA	NA	NA	NA
I	I:1285276	1285276	T	A	0.0634921	-0.0206953	0.113458	0.855265	0.06789930023544362	CV_mean_number	4.342568737130753	0	NA	NA	NA	NA	NA	NA	NA	NA	NA
I	I:1285647	1285647	T	C	0.48254	0.0432028	0.0553152	0.434785	0.3617254474045111	CV_mean_number	4.342568737130753	0	NA	NA	NA	NA	NA	NA	NA	NA	NA
I	I:1287916	1287916	C	A	0.231746	-0.0927684	0.0653613	0.155806	0.8074158219091702	CV_mean_number	4.342568737130753	0	NA	NA	NA	NA	NA	NA	NA	NA	NA
I	I:1290298	1290298	T	C	0.247619	0.0967595	0.0638667	0.129767	0.8868357354250194	CV_mean_number	4.342568737130753	0	NA	NA	NA	NA	NA	NA	NA	NA	NA
I	I:1294186	1294186	T	C	0.0507937	0.00418614	0.126005	0.973497	0.011665382495724835	CV_mean_number	4.342568737130753	0	NA	NA	NA	NA	NA	NA	NA	NA	NA
I	I:1305349	1305349	T	C	0.24127	0.10225	0.0644074	0.112389	0.9492761929758358	CV_mean_number	4.342568737130753	0	NA	NA	NA	NA	NA	NA	NA	NA	NA
I	I:1306367	1306367	T	A	0.365079	0.0504302	0.0573963	0.379601	0.4206726521617369	CV_mean_number	4.342568737130753	0	NA	NA	NA	NA	NA	NA	NA	NA	NA
I	I:1311054	1311054	C	T	0.161905	-0.0578274	0.0750385	0.440922	0.355638231316033	CV_mean_number	4.342568737130753	0	NA	NA	NA	NA	NA	NA	NA	NA	NA
I	I:1312071	1312071	A	G	0.47619	0.0104285	0.055395	0.850675	0.07023633023916342	CV_mean_number	4.342568737130753	0	NA	NA	NA	NA	NA	NA	NA	NA	NA
I	I:1312700	1312700	G	T	0.101587	-0.0627654	0.0915142	0.492805	0.3073248944690498	CV_mean_number	4.342568737130753	0	NA	NA	NA	NA	NA	NA	NA	NA	NA
I	I:1312794	1312794	T	C	0.0857143	-0.0676179	0.0987597	0.493551	0.3066679638166793	CV_mean_number	4.342568737130753	0	NA	NA	NA	NA	NA	NA	NA	NA	NA
I	I:1313313	1313313	A	G	0.298413	0.0523412	0.0603952	0.386136	0.41325970660566347	CV_mean_number	4.342568737130753	0	NA	NA	NA	NA	NA	NA	NA	NA	NA
I	I:1326318	1326318	G	A	0.130159	0.0401936	0.0821958	0.624843	0.20422909113437754	CV_mean_number	4.342568737130753	0	NA	NA	NA	NA	NA	NA	NA	NA	NA
I	I:1333076	1333076	T	C	0.0984127	0.082395	0.0927676	0.37444	0.4266177634292247	CV_mean_number	4.342568737130753	0	NA	NA	NA	NA	NA	NA	NA	NA	NA
I	I:1336302	1336302	A	G	0.0952381	-0.097965	0.0940912	0.297796	0.5260811399941665	CV_mean_number	4.342568737130753	0	NA	NA	NA	NA	NA	NA	NA	NA	NA
I	I:1338957	1338957	G	A	0.422222	0.0609785	0.055911	0.275434	0.5599824507857855	CV_mean_number	4.342568737130753	0	NA	NA	NA	NA	NA	NA	NA	NA	NA
I	I:1341202	1341202	A	C	0.0507937	0.0351277	0.125989	0.780387	0.10768997386912602	CV_mean_number	4.342568737130753	0	NA	NA	NA	NA	NA	NA	NA	NA	NA
I	I:1358450	1358450	A	T	0.206349	-0.0130907	0.0683645	0.848146	0.07152938178031545	CV_mean_number	4.342568737130753	0	NA	NA	NA	NA	NA	NA	NA	NA	NA
I	I:1359466	1359466	G	A	0.184127	0.135921	0.0709696	0.0554665	1.2559692377383178	CV_mean_number	4.342568737130753	0	NA	NA	NA	NA	NA	NA	NA	NA	NA
I	I:1367615	1367615	A	G	0.146032	0.212735	0.0774197	0.00599934	2.22189652463704	CV_mean_number	4.342568737130753	0	NA	NA	NA	NA	NA	NA	NA	NA	NA
I	I:1375324	1375324	G	A	0.0698413	-0.0585777	0.108501	0.58928	0.2296782984891622	CV_mean_number	4.342568737130753	0	NA	NA	NA	NA	NA	NA	NA	NA	NA
I	I:1392829	1392829	A	G	0.0507937	-0.108915	0.125854	0.386816	0.4124955703491251	CV_mean_number	4.342568737130753	0	NA	NA	NA	NA	NA	NA	NA	NA	NA
I	I:1392873	1392873	G	A	0.0793651	-0.0791604	0.102258	0.438858	0.3576759804242008	CV_mean_number	4.342568737130753	0	NA	NA	NA	NA	NA	NA	NA	NA	NA
I	I:1400428	1400428	G	A	0.266667	0.0340489	0.0625362	0.586121	0.23201271809844345	CV_mean_number	4.342568737130753	0	NA	NA	NA	NA	NA	NA	NA	NA	NA
I	I:1402717	1402717	T	G	0.133333	0.00155787	0.081391	0.984729	0.006683272038359868	CV_mean_number	4.342568737130753	0	NA	NA	NA	NA	NA	NA	NA	NA	NA
I	I:1404829	1404829	T	C	0.485714	0.0333181	0.0553259	0.547031	0.2619880616968122	CV_mean_number	4.342568737130753	0	NA	NA	NA	NA	NA	NA	NA	NA	NA
I	I:1405469	1405469	G	C	0.0666667	-0.0235172	0.110909	0.832076	0.07983700439050982	CV_mean_number	4.342568737130753	0	NA	NA	NA	NA	NA	NA	NA	NA	NA
I	I:1406148	1406148	T	G	0.0507937	-0.147819	0.125728	0.239711	0.6203120363472854	CV_mean_number	4.342568737130753	0	NA	NA	NA	NA	NA	NA	NA	NA	NA
I	I:1410049	1410049	T	C	0.0761905	-0.0665217	0.104219	0.523287	0.2812600542884138	CV_mean_number	4.342568737130753	0	NA	NA	NA	NA	NA	NA	NA	NA	NA
I	I:1410349	1410349	G	A	0.384127	0.0508246	0.0568113	0.370989	0.4306389672316494	CV_mean_number	4.342568737130753	0	NA	NA	NA	NA	NA	NA	NA	NA	NA
I	I:1416044	1416044	C	T	0.228571	0.0718643	0.0657637	0.274497	0.5614623976276064	CV_mean_number	4.342568737130753	0	NA	NA	NA	NA	NA	NA	NA	NA	NA
I	I:1420566	1420566	G	A	0.0539683	0.00209712	0.122448	0.986336	0.0059751153950691055	CV_mean_number	4.342568737130753	0	NA	NA	NA	NA	NA	NA	NA	NA	NA
I	I:1435250	1435250	A	T	0.111111	0.168937	0.0875185	0.0535704	1.2710751108206408	CV_mean_number	4.342568737130753	0	NA	NA	NA	NA	NA	NA	NA	NA	NA
I	I:1445264	1445264	T	C	0.133333	0.0647084	0.0813089	0.426128	0.37045992825912877	CV_mean_number	4.342568737130753	0	NA	NA	NA	NA	NA	NA	NA	NA	NA
I	I:1447700	1447700	T	C	0.161905	0.0600881	0.0750328	0.423233	0.3734204771752397	CV_mean_number	4.342568737130753	0	NA	NA	NA	NA	NA	NA	NA	NA	NA
I	I:1451070	1451070	C	T	0.0603175	-0.136483	0.115958	0.239194	0.6212497184945507	CV_mean_number	4.342568737130753	0	NA	NA	NA	NA	NA	NA	NA	NA	NA
I	I:1460652	1460652	A	G	0.126984	0.181026	0.0824648	0.0281497	1.5505262291976734	CV_mean_number	4.342568737130753	0	NA	NA	NA	NA	NA	NA	NA	NA	NA
I	I:1466324	1466324	G	A	0.114286	0.0338716	0.0869409	0.696837	0.15686879762551192	CV_mean_number	4.342568737130753	0	NA	NA	NA	NA	NA	NA	NA	NA	NA
I	I:1466443	1466443	A	G	0.460317	-0.074822	0.0553491	0.176432	0.7534226427697543	CV_mean_number	4.342568737130753	0	NA	NA	NA	NA	NA	NA	NA	NA	NA
I	I:1466639	1466639	A	G	0.0539683	0.0501036	0.122415	0.682324	0.16600935261830055	CV_mean_number	4.342568737130753	0	NA	NA	NA	NA	NA	NA	NA	NA	NA
I	I:1471432	1471432	A	T	0.219048	9.9011e-4	0.0668945	0.988191	0.005159105787763905	CV_mean_number	4.342568737130753	0	NA	NA	NA	NA	NA	NA	NA	NA	NA
I	I:1476055	1476055	A	G	0.0952381	0.074343	0.0941603	0.429798	0.36673560976357206	CV_mean_number	4.342568737130753	0	NA	NA	NA	NA	NA	NA	NA	NA	NA
I	I:1476121	1476121	G	A	0.0825397	-0.0573697	0.10049	0.568066	0.24560120342519706	CV_mean_number	4.342568737130753	0	NA	NA	NA	NA	NA	NA	NA	NA	NA
I	I:1476240	1476240	T	G	0.498413	-0.0734841	0.0551795	0.182949	0.7376699600263424	CV_mean_number	4.342568737130753	0	NA	NA	NA	NA	NA	NA	NA	NA	NA
I	I:1478424	1478424	A	T	0.133333	0.0807506	0.081263	0.320372	0.4943454475717912	CV_mean_number	4.342568737130753	0	NA	NA	NA	NA	NA	NA	NA	NA	NA
I	I:1480815	1480815	A	C	0.0507937	-0.127326	0.125799	0.311471	0.5065823827970244	CV_mean_number	4.342568737130753	0	NA	NA	NA	NA	NA	NA	NA	NA	NA
I	I:1484843	1484843	A	G	0.425397	0.0692958	0.0558245	0.214489	0.6685949755622334	CV_mean_number	4.342568737130753	0	NA	NA	NA	NA	NA	NA	NA	NA	NA
I	I:1486538	1486538	T	A	0.0761905	-0.00716437	0.104286	0.945229	0.02446296250859531	CV_mean_number	4.342568737130753	0	NA	NA	NA	NA	NA	NA	NA	NA	NA
I	I:1486763	1486763	A	T	0.0857143	0.138366	0.0985237	0.1602	0.7953374882517812	CV_mean_number	4.342568737130753	0	NA	NA	NA	NA	NA	NA	NA	NA	NA
I	I:1486849	1486849	T	C	0.0984127	-0.0362105	0.0928618	0.696582	0.15702775210240885	CV_mean_number	4.342568737130753	0	NA	NA	NA	NA	NA	NA	NA	NA	NA
I	I:1486876	1486876	A	G	0.0761905	-0.162524	0.103882	0.117699	0.9292272270149071	CV_mean_number	4.342568737130753	0	NA	NA	NA	NA	NA	NA	NA	NA	NA
I	I:1487987	1487987	C	G	0.104762	0.0152749	0.0903403	0.865733	0.0626160277353947	CV_mean_number	4.342568737130753	0	NA	NA	NA	NA	NA	NA	NA	NA	NA
I	I:1489001	1489001	C	G	0.126984	0.181026	0.0824648	0.0281497	1.5505262291976734	CV_mean_number	4.342568737130753	0	NA	NA	NA	NA	NA	NA	NA	NA	NA
I	I:1489320	1489320	A	G	0.488889	0.07347	0.055193	0.183141	0.7372144187759906	CV_mean_number	4.342568737130753	0	NA	NA	NA	NA	NA	NA	NA	NA	NA
I	I:1493923	1493923	A	G	0.0888889	0.115321	0.0970028	0.234503	0.6298515969782721	CV_mean_number	4.342568737130753	0	NA	NA	NA	NA	NA	NA	NA	NA	NA
I	I:1498938	1498938	T	C	0.479365	0.113384	0.0550104	0.0392897	1.40572128726969	CV_mean_number	4.342568737130753	0	NA	NA	NA	NA	NA	NA	NA	NA	NA
I	I:1501105	1501105	A	G	0.438095	-0.0646445	0.0556445	0.245341	0.6102298688916575	CV_mean_number	4.342568737130753	0	NA	NA	NA	NA	NA	NA	NA	NA	NA
I	I:1503260	1503260	C	T	0.0857143	-0.0942515	0.0986899	0.339564	0.46907835915274987	CV_mean_number	4.342568737130753	0	NA	NA	NA	NA	NA	NA	NA	NA	NA
I	I:1510450	1510450	G	A	0.374603	0.0613101	0.057057	0.28258	0.5488585792072369	CV_mean_number	4.342568737130753	0	NA	NA	NA	NA	NA	NA	NA	NA	NA
I	I:1510599	1510599	G	A	0.0507937	-0.094873	0.125891	0.451081	0.34574546545147283	CV_mean_number	4.342568737130753	0	NA	NA	NA	NA	NA	NA	NA	NA	NA
I	I:1512355	1512355	G	A	0.469841	0.0544618	0.0553507	0.325144	0.48792425577551624	CV_mean_number	4.342568737130753	0	NA	NA	NA	NA	NA	NA	NA	NA	NA
I	I:1514332	1514332	G	A	0.104762	0.0833511	0.0902215	0.355564	0.44908221674795634	CV_mean_number	4.342568737130753	0	NA	NA	NA	NA	NA	NA	NA	NA	NA
I	I:1537385	1537385	C	T	0.488889	0.0198418	0.0553376	0.719925	0.14271274493362512	CV_mean_number	4.342568737130753	0	NA	NA	NA	NA	NA	NA	NA	NA	NA
I	I:1537976	1537976	T	C	0.0952381	0.131406	0.0939609	0.161956	0.7906029580050067	CV_mean_number	4.342568737130753	0	NA	NA	NA	NA	NA	NA	NA	NA	NA
I	I:1538131	1538131	T	C	0.0571429	-0.0282532	0.119187	0.812619	0.09011302756868995	CV_mean_number	4.342568737130753	0	NA	NA	NA	NA	NA	NA	NA	NA	NA
I	I:1538229	1538229	T	A	0.152381	0.0758804	0.0768655	0.323553	0.4900545690224089	CV_mean_number	4.342568737130753	0	NA	NA	NA	NA	NA	NA	NA	NA	NA
I	I:1545531	1545531	A	T	0.498413	-0.119623	0.0549209	0.0293987	1.5316718735099215	CV_mean_number	4.342568737130753	0	NA	NA	NA	NA	NA	NA	NA	NA	NA
I	I:1545548	1545548	C	A	0.422222	-0.0632553	0.055903	0.257836	0.588656444974013	CV_mean_number	4.342568737130753	0	NA	NA	NA	NA	NA	NA	NA	NA	NA
I	I:1548566	1548566	G	A	0.368254	-0.0723349	0.057216500000000003	0.206147	0.6858229809835342	CV_mean_number	4.342568737130753	0	NA	NA	NA	NA	NA	NA	NA	NA	NA
I	I:1549172	1549172	T	C	0.130159	0.040643	0.0821951	0.620974	0.20692658322586	CV_mean_number	4.342568737130753	0	NA	NA	NA	NA	NA	NA	NA	NA	NA
I	I:1549341	1549341	A	C	0.406349	0.080937	0.0561462	0.149432	0.8255563909055719	CV_mean_number	4.342568737130753	0	NA	NA	NA	NA	NA	NA	NA	NA	NA
I	I:1552914	1552914	G	T	0.0698413	0.109501	0.108375	0.312311	0.5054127190833791	CV_mean_number	4.342568737130753	0	NA	NA	NA	NA	NA	NA	NA	NA	NA
I	I:1554725	1554725	A	T	0.492063	-0.0757816	0.0551763	0.169614	0.7705383037785267	CV_mean_number	4.342568737130753	0	NA	NA	NA	NA	NA	NA	NA	NA	NA
I	I:1557902	1557902	C	A	0.0857143	-0.107727	0.0986459	0.274807	0.5609722089390733	CV_mean_number	4.342568737130753	0	NA	NA	NA	NA	NA	NA	NA	NA	NA
I	I:1557984	1557984	T	C	0.0793651	0.0322788	0.10234	0.752452	0.12352119912284959	CV_mean_number	4.342568737130753	0	NA	NA	NA	NA	NA	NA	NA	NA	NA
I	I:1558209	1558209	T	A	0.0507937	-0.11436	0.125839	0.363466	0.43953620847206254	CV_mean_number	4.342568737130753	0	NA	NA	NA	NA	NA	NA	NA	NA	NA
I	I:1564135	1564135	C	T	0.101587	0.0550839	0.09153	0.547299	0.2617753453800213	CV_mean_number	4.342568737130753	0	NA	NA	NA	NA	NA	NA	NA	NA	NA
I	I:1570291	1570291	C	T	0.0634921	0.0325567	0.113449	0.774133	0.11118441889853198	CV_mean_number	4.342568737130753	0	NA	NA	NA	NA	NA	NA	NA	NA	NA
I	I:1580947	1580947	G	A	0.0603175	0.0637568	0.116159	0.58309	0.23426440667029427	CV_mean_number	4.342568737130753	0	NA	NA	NA	NA	NA	NA	NA	NA	NA
I	I:1581701	1581701	A	T	0.0571429	-0.109049	0.119038	0.359622	0.4441537480112598	CV_mean_number	4.342568737130753	0	NA	NA	NA	NA	NA	NA	NA	NA	NA
I	I:1582461	1582461	A	G	0.146032	0.0794974	0.078219	0.309465	0.5093884618826339	CV_mean_number	4.342568737130753	0	NA	NA	NA	NA	NA	NA	NA	NA	NA
I	I:1583155	1583155	A	G	0.47619	-0.096748	0.0551276	0.0792621	1.1009344254874436	CV_mean_number	4.342568737130753	0	NA	NA	NA	NA	NA	NA	NA	NA	NA
I	I:1585346	1585346	A	G	0.12381	0.109555	0.0837747	0.190963	0.7190507712467376	CV_mean_number	4.342568737130753	0	NA	NA	NA	NA	NA	NA	NA	NA	NA
I	I:1586350	1586350	C	T	0.0888889	0.111951	0.0970155	0.248519	0.6046404025857038	CV_mean_number	4.342568737130753	0	NA	NA	NA	NA	NA	NA	NA	NA	NA
I	I:1586612	1586612	A	G	0.0634921	-0.0565298	0.113419	0.61819	0.20887802447482504	CV_mean_number	4.342568737130753	0	NA	NA	NA	NA	NA	NA	NA	NA	NA
I	I:1588561	1588561	G	A	0.488889	-0.0400562	0.0553026	0.468876	0.3289419965943133	CV_mean_number	4.342568737130753	0	NA	NA	NA	NA	NA	NA	NA	NA	NA
I	I:1588843	1588843	A	G	0.0698413	-0.188589	0.108027	0.0808533	1.0923022498139479	CV_mean_number	4.342568737130753	0	NA	NA	NA	NA	NA	NA	NA	NA	NA
I	I:1588855	1588855	G	A	0.453968	0.0319184	0.055542	0.565513	0.24755740707208707	CV_mean_number	4.342568737130753	0	NA	NA	NA	NA	NA	NA	NA	NA	NA
I	I:1588888	1588888	G	A	0.396825	0.0673568	0.0564241	0.232572	0.6334425723997762	CV_mean_number	4.342568737130753	0	NA	NA	NA	NA	NA	NA	NA	NA	NA
I	I:1592014	1592014	C	T	0.406349	-0.0768052	0.0561647	0.171469	0.7658143849265745	CV_mean_number	4.342568737130753	0	NA	NA	NA	NA	NA	NA	NA	NA	NA
I	I:1592181	1592181	T	C	0.0666667	-0.141666	0.110628	0.200349	0.6982128209156625	CV_mean_number	4.342568737130753	0	NA	NA	NA	NA	NA	NA	NA	NA	NA
I	I:1592712	1592712	A	C	0.0761905	-0.0905518	0.104161	0.384661	0.4149218436994072	CV_mean_number	4.342568737130753	0	NA	NA	NA	NA	NA	NA	NA	NA	NA
I	I:1594392	1594392	G	A	0.133333	-0.0197796	0.0813834	0.807973	0.09260315178349798	CV_mean_number	4.342568737130753	0	NA	NA	NA	NA	NA	NA	NA	NA	NA
I	I:1597967	1597967	T	G	0.0571429	0.119426	0.119007	0.315608	0.5008519968700285	CV_mean_number	4.342568737130753	0	NA	NA	NA	NA	NA	NA	NA	NA	NA
I	I:1598497	1598497	C	A	0.485714	-0.0598711	0.0552544	0.278562	0.5550781280983492	CV_mean_number	4.342568737130753	0	NA	NA	NA	NA	NA	NA	NA	NA	NA
I	I:1601130	1601130	T	A	0.403175	0.0930225	0.0561574	0.097628499999999993	1.0104233832970797	CV_mean_number	4.342568737130753	0	NA	NA	NA	NA	NA	NA	NA	NA	NA
I	I:1604842	1604842	A	G	0.139683	0.165676	0.0792614	0.0365953	1.4365746882431796	CV_mean_number	4.342568737130753	0	NA	NA	NA	NA	NA	NA	NA	NA	NA
I	I:1610723	1610723	G	A	0.165079	-0.00399963	0.0745249	0.957199	0.01899776377225336	CV_mean_number	4.342568737130753	0	NA	NA	NA	NA	NA	NA	NA	NA	NA
I	I:1622740	1622740	T	A	0.447619	-0.07028	0.0554995	0.205399	0.687401675127928	CV_mean_number	4.342568737130753	0	NA	NA	NA	NA	NA	NA	NA	NA	NA
I	I:1625311	1625311	A	T	0.0920635	-0.0839536	0.0955798	0.379747	0.42050564837654425	CV_mean_number	4.342568737130753	0	NA	NA	NA	NA	NA	NA	NA	NA	NA
I	I:1635216	1635216	A	G	0.4	0.107947	0.0561458	0.0545271	1.2633875994613297	CV_mean_number	4.342568737130753	0	NA	NA	NA	NA	NA	NA	NA	NA	NA
I	I:1638691	1638691	A	C	0.485714	0.0728646	0.0552045	0.186867	0.7284673866002568	CV_mean_number	4.342568737130753	0	NA	NA	NA	NA	NA	NA	NA	NA	NA
I	I:1649426	1649426	T	C	0.0634921	-0.141125	0.113183	0.212444	0.6727555300660557	CV_mean_number	4.342568737130753	0	NA	NA	NA	NA	NA	NA	NA	NA	NA
I	I:1651849	1651849	G	T	0.466667	0.0823631	0.0552629	0.136123	0.8660684881018781	CV_mean_number	4.342568737130753	0	NA	NA	NA	NA	NA	NA	NA	NA	NA
I	I:1654361	1654361	C	T	0.130159	-0.0927042	0.0820601	0.258598	0.5873748382813118	CV_mean_number	4.342568737130753	0	NA	NA	NA	NA	NA	NA	NA	NA	NA
I	I:1656062	1656062	A	G	0.177778	-0.0812191	0.072221	0.260762	0.5837556966545809	CV_mean_number	4.342568737130753	0	NA	NA	NA	NA	NA	NA	NA	NA	NA
I	I:1657013	1657013	A	G	0.120635	-0.0372675	0.0849215	0.660772	0.17994836838611986	CV_mean_number	4.342568737130753	0	NA	NA	NA	NA	NA	NA	NA	NA	NA
I	I:1657783	1657783	C	A	0.0857143	-0.0983326	0.0986772	0.319004	0.49620387127812826	CV_mean_number	4.342568737130753	0	NA	NA	NA	NA	NA	NA	NA	NA	NA
I	I:1657899	1657899	C	T	0.307937	0.109305	0.0596141	0.0667221	1.1757302932447258	CV_mean_number	4.342568737130753	0	NA	NA	NA	NA	NA	NA	NA	NA	NA
I	I:1664344	1664344	T	C	0.136508	0.00803521	0.0805856	0.920574	0.035941295155692735	CV_mean_number	4.342568737130753	0	NA	NA	NA	NA	NA	NA	NA	NA	NA
I	I:1667205	1667205	A	G	0.0793651	-0.150057	0.102004	0.141269	0.8499531290644078	CV_mean_number	4.342568737130753	0	NA	NA	NA	NA	NA	NA	NA	NA	NA
I	I:1673170	1673170	C	T	0.273016	-0.103743	0.061826	0.0933503	1.0298842820198282	CV_mean_number	4.342568737130753	0	NA	NA	NA	NA	NA	NA	NA	NA	NA
I	I:1673864	1673864	T	C	0.139683	-0.0697334	0.0797153	0.381693	0.4182858046546464	CV_mean_number	4.342568737130753	0	NA	NA	NA	NA	NA	NA	NA	NA	NA
I	I:1677771	1677771	T	C	0.184127	-0.075438	0.0712568	0.289746	0.5379825508429465	CV_mean_number	4.342568737130753	0	NA	NA	NA	NA	NA	NA	NA	NA	NA
I	I:1678965	1678965	T	C	0.0952381	0.02737	0.0942413	0.771491	0.11266913593023752	CV_mean_number	4.342568737130753	0	NA	NA	NA	NA	NA	NA	NA	NA	NA
I	I:1679070	1679070	C	T	0.444444	-0.0750419	0.0555183	0.176484	0.7532946615321657	CV_mean_number	4.342568737130753	0	NA	NA	NA	NA	NA	NA	NA	NA	NA
I	I:1681731	1681731	A	T	0.206349	-0.0706791	0.0682517	0.300405	0.5222928431247993	CV_mean_number	4.342568737130753	0	NA	NA	NA	NA	NA	NA	NA	NA	NA
I	I:1682992	1682992	G	A	0.0603175	-0.0638545	0.116158	0.582512	0.23469512355498626	CV_mean_number	4.342568737130753	0	NA	NA	NA	NA	NA	NA	NA	NA	NA
I	I:1688010	1688010	A	G	0.0507937	-0.048896	0.125975	0.697911	0.1561999565649702	CV_mean_number	4.342568737130753	0	NA	NA	NA	NA	NA	NA	NA	NA	NA
I	I:1689321	1689321	T	C	0.0888889	-0.0145596	0.0972181	0.880952	0.055047754133965295	CV_mean_number	4.342568737130753	0	NA	NA	NA	NA	NA	NA	NA	NA	NA
I	I:1691867	1691867	C	A	0.0507937	0.128988	0.125794	0.305179	0.5154453543931145	CV_mean_number	4.342568737130753	0	NA	NA	NA	NA	NA	NA	NA	NA	NA
I	I:1693647	1693647	T	G	0.11746	0.121764	0.0856569	0.155161	0.8092174300704189	CV_mean_number	4.342568737130753	0	NA	NA	NA	NA	NA	NA	NA	NA	NA
I	I:1695463	1695463	A	G	0.225397	-0.135586	0.0657704	0.0392544	1.4061116564060956	CV_mean_number	4.342568737130753	0	NA	NA	NA	NA	NA	NA	NA	NA	NA
I	I:1696409	1696409	A	T	0.12381	0.0543279	0.0839471	0.517523	0.2860703443229913	CV_mean_number	4.342568737130753	0	NA	NA	NA	NA	NA	NA	NA	NA	NA
I	I:1697969	1697969	C	T	0.149206	-0.125814	0.0773282	0.103734	0.9840788753153378	CV_mean_number	4.342568737130753	0	NA	NA	NA	NA	NA	NA	NA	NA	NA
I	I:1698158	1698158	T	C	0.428571	-0.00318737	0.0559084	0.954537	0.020207232713590345	CV_mean_number	4.342568737130753	0	NA	NA	NA	NA	NA	NA	NA	NA	NA
I	I:1700479	1700479	C	T	0.225397	0.0443321	0.0661679	0.502861	0.298552045312819	CV_mean_number	4.342568737130753	0	NA	NA	NA	NA	NA	NA	NA	NA	NA
I	I:1704244	1704244	A	C	0.168254	0.0736722	0.0738422	0.318426	0.49699147863686266	CV_mean_number	4.342568737130753	0	NA	NA	NA	NA	NA	NA	NA	NA	NA
I	I:1715240	1715240	G	T	0.0698413	-0.0913038	0.108429	0.399755	0.39820609553962777	CV_mean_number	4.342568737130753	0	NA	NA	NA	NA	NA	NA	NA	NA	NA
I	I:1718739	1718739	T	C	0.203175	-0.0497124	0.0687057	0.469339	0.3285133563328716	CV_mean_number	4.342568737130753	0	NA	NA	NA	NA	NA	NA	NA	NA	NA
I	I:1718986	1718986	A	T	0.0761905	-0.0897145	0.104164	0.389082	0.4099588603848886	CV_mean_number	4.342568737130753	0	NA	NA	NA	NA	NA	NA	NA	NA	NA
I	I:1719434	1719434	A	T	0.0793651	-0.149472	0.102007	0.142835	0.8451653608764536	CV_mean_number	4.342568737130753	0	NA	NA	NA	NA	NA	NA	NA	NA	NA
I	I:1719435	1719435	A	T	0.463492	-0.109075	0.0551398	0.0479103	1.319571109710908	CV_mean_number	4.342568737130753	0	NA	NA	NA	NA	NA	NA	NA	NA	NA
I	I:1721466	1721466	A	T	0.126984	-0.0985631	0.0829102	0.234521	0.6298182626470732	CV_mean_number	4.342568737130753	0	NA	NA	NA	NA	NA	NA	NA	NA	NA
I	I:1721502	1721502	C	T	0.165079	0.133108	0.0741445	0.0726142	1.138978442955352	CV_mean_number	4.342568737130753	0	NA	NA	NA	NA	NA	NA	NA	NA	NA
I	I:1726395	1726395	T	C	0.0793651	-0.0452901	0.102324	0.658044	0.18174506638858112	CV_mean_number	4.342568737130753	0	NA	NA	NA	NA	NA	NA	NA	NA	NA
I	I:1727192	1727192	G	T	0.130159	-0.0730245	0.0821235	0.373894	0.4272515040562621	CV_mean_number	4.342568737130753	0	NA	NA	NA	NA	NA	NA	NA	NA	NA
I	I:1729328	1729328	A	G	0.0698413	-0.0952441	0.108418	0.37968	0.4205822791267362	CV_mean_number	4.342568737130753	0	NA	NA	NA	NA	NA	NA	NA	NA	NA
I	I:1731008	1731008	T	A	0.0539683	0.0366962	0.12243	0.764382	0.11668954845207986	CV_mean_number	4.342568737130753	0	NA	NA	NA	NA	NA	NA	NA	NA	NA
I	I:1732348	1732348	T	C	0.250794	0.0625547	0.0637303	0.32632	0.48635630769096183	CV_mean_number	4.342568737130753	0	NA	NA	NA	NA	NA	NA	NA	NA	NA
I	I:1734383	1734383	A	C	0.180952	0.10274	0.071633	0.151497	0.8195959671375556	CV_mean_number	4.342568737130753	0	NA	NA	NA	NA	NA	NA	NA	NA	NA
I	I:1734927	1734927	A	T	0.152381	0.0454556	0.0769422	0.55467	0.25596532282999973	CV_mean_number	4.342568737130753	0	NA	NA	NA	NA	NA	NA	NA	NA	NA
I	I:1739301	1739301	T	A	0.149206	0.0125625	0.0776512	0.871478	0.059743571949512686	CV_mean_number	4.342568737130753	0	NA	NA	NA	NA	NA	NA	NA	NA	NA
I	I:1746038	1746038	G	A	0.203175	0.0407907	0.0687245	0.552821	0.25741546778491864	CV_mean_number	4.342568737130753	0	NA	NA	NA	NA	NA	NA	NA	NA	NA
I	I:1748330	1748330	T	C	0.279365	0.0228222	0.0616501	0.711241	0.14798321609784523	CV_mean_number	4.342568737130753	0	NA	NA	NA	NA	NA	NA	NA	NA	NA
I	I:1748522	1748522	A	G	0.222222	0.0484315	0.0664941	0.466394	0.33124704526373466	CV_mean_number	4.342568737130753	0	NA	NA	NA	NA	NA	NA	NA	NA	NA
I	I:1751570	1751570	A	G	0.101587	0.0503166	0.0915388	0.582542	0.23467275749391103	CV_mean_number	4.342568737130753	0	NA	NA	NA	NA	NA	NA	NA	NA	NA
I	I:1762305	1762305	A	G	0.107937	-0.0721952	0.0890707	0.417631	0.37920727190892006	CV_mean_number	4.342568737130753	0	NA	NA	NA	NA	NA	NA	NA	NA	NA
I	I:1763622	1763622	C	T	0.0698413	-0.0479165	0.108518	0.658813	0.18123783972001045	CV_mean_number	4.342568737130753	0	NA	NA	NA	NA	NA	NA	NA	NA	NA
I	I:1768295	1768295	G	A	0.0761905	-0.0839176	0.104179	0.420524	0.3762092132545847	CV_mean_number	4.342568737130753	0	NA	NA	NA	NA	NA	NA	NA	NA	NA
I	I:1773355	1773355	A	G	0.0666667	-0.108637	0.110747	0.326619	0.4859585551929005	CV_mean_number	4.342568737130753	0	NA	NA	NA	NA	NA	NA	NA	NA	NA
I	I:1775350	1775350	G	T	0.139683	-0.1076	0.0795806	0.176345	0.7536368495955483	CV_mean_number	4.342568737130753	0	NA	NA	NA	NA	NA	NA	NA	NA	NA
I	I:1775399	1775399	A	C	0.492063	0.0420587	0.0552912	0.44685	0.34983823772927514	CV_mean_number	4.342568737130753	0	NA	NA	NA	NA	NA	NA	NA	NA	NA
I	I:1777085	1777085	C	T	0.288889	0.00943518	0.061041	0.877159	0.05692167623060181	CV_mean_number	4.342568737130753	0	NA	NA	NA	NA	NA	NA	NA	NA	NA
I	I:1778576	1778576	C	A	0.190476	0.00829274	0.0704575	0.906307	0.04272466565459866	CV_mean_number	4.342568737130753	0	NA	NA	NA	NA	NA	NA	NA	NA	NA
I	I:1780496	1780496	T	G	0.184127	0.0650551	0.0712894	0.36148	0.44191572639136045	CV_mean_number	4.342568737130753	0	NA	NA	NA	NA	NA	NA	NA	NA	NA
I	I:1785437	1785437	C	T	0.31746	-0.00464218	0.0594373	0.937747	0.027914316551304972	CV_mean_number	4.342568737130753	0	NA	NA	NA	NA	NA	NA	NA	NA	NA
I	I:1790278	1790278	A	G	0.444444	0.0114968	0.0556763	0.836405	0.07758337964929761	CV_mean_number	4.342568737130753	0	NA	NA	NA	NA	NA	NA	NA	NA	NA
I	I:1791536	1791536	T	A	0.120635	-0.120376	0.0846747	0.155133	0.80929580893386	CV_mean_number	4.342568737130753	0	NA	NA	NA	NA	NA	NA	NA	NA	NA
I	I:1792401	1792401	C	A	0.101587	-0.0576605	0.0915249	0.528696	0.27679397536091677	CV_mean_number	4.342568737130753	0	NA	NA	NA	NA	NA	NA	NA	NA	NA
I	I:1794822	1794822	A	G	0.257143	9.47015e-4	0.0633041	0.988064	0.005214923887429823	CV_mean_number	4.342568737130753	0	NA	NA	NA	NA	NA	NA	NA	NA	NA
I	I:1795635	1795635	T	C	0.298413	-0.00387917	0.0604672	0.948848	0.02280335348250667	CV_mean_number	4.342568737130753	0	NA	NA	NA	NA	NA	NA	NA	NA	NA
I	I:1800531	1800531	T	A	0.0793651	-0.152809	0.101991	0.134066	0.8726813480589478	CV_mean_number	4.342568737130753	0	NA	NA	NA	NA	NA	NA	NA	NA	NA
I	I:1803069	1803069	C	G	0.396825	0.0817808	0.0563632	0.14679	0.8333035295203993	CV_mean_number	4.342568737130753	0	NA	NA	NA	NA	NA	NA	NA	NA	NA
I	I:1804162	1804162	A	G	0.473016	0.0492256	0.0553462	0.373781	0.4273827784116404	CV_mean_number	4.342568737130753	0	NA	NA	NA	NA	NA	NA	NA	NA	NA
I	I:1806844	1806844	T	C	0.142857	0.0972852	0.0788754	0.217426	0.6626885238128831	CV_mean_number	4.342568737130753	0	NA	NA	NA	NA	NA	NA	NA	NA	NA
I	I:1806906	1806906	T	C	0.260317	0.0414192	0.0630084	0.510949	0.29162244648746793	CV_mean_number	4.342568737130753	0	NA	NA	NA	NA	NA	NA	NA	NA	NA
I	I:1809996	1809996	T	A	0.412698	0.0798046	0.0560172	0.15426	0.8117466729734958	CV_mean_number	4.342568737130753	0	NA	NA	NA	NA	NA	NA	NA	NA	NA
I	I:1810726	1810726	C	T	0.263492	0.00475601	0.0628052	0.93963700000000006	0.027039890383730864	CV_mean_number	4.342568737130753	0	NA	NA	NA	NA	NA	NA	NA	NA	NA
I	I:1811043	1811043	G	A	0.2	0.0665513	0.0690668	0.335257	0.47462214552815873	CV_mean_number	4.342568737130753	0	NA	NA	NA	NA	NA	NA	NA	NA	NA
I	I:1811283	1811283	G	A	0.298413	0.0190213	0.060458	0.75305	0.12317618714168097	CV_mean_number	4.342568737130753	0	NA	NA	NA	NA	NA	NA	NA	NA	NA
I	I:1818743	1818743	A	C	0.0539683	0.00222939	0.122448	0.985474	0.006354829330234025	CV_mean_number	4.342568737130753	0	NA	NA	NA	NA	NA	NA	NA	NA	NA
I	I:1819127	1819127	A	G	0.0793651	-0.1096	0.102168	0.28339	0.5476154787937207	CV_mean_number	4.342568737130753	0	NA	NA	NA	NA	NA	NA	NA	NA	NA
I	I:1819339	1819339	G	A	0.311111	0.00997454	0.0597614	0.867444	0.061758552590119815	CV_mean_number	4.342568737130753	0	NA	NA	NA	NA	NA	NA	NA	NA	NA
I	I:1819404	1819404	T	C	0.396825	-0.0366669	0.0565144	0.516463	0.2869607863833029	CV_mean_number	4.342568737130753	0	NA	NA	NA	NA	NA	NA	NA	NA	NA
I	I:1820122	1820122	A	G	0.434921	-0.0137526	0.0558046	0.80534	0.09402072963245288	CV_mean_number	4.342568737130753	0	NA	NA	NA	NA	NA	NA	NA	NA	NA
I	I:1820185	1820185	A	C	0.12381	-0.109532	0.0837748	0.191059	0.7188324996752556	CV_mean_number	4.342568737130753	0	NA	NA	NA	NA	NA	NA	NA	NA	NA
I	I:1822641	1822641	T	G	0.0507937	-0.204521	0.125473	0.103103	0.9867286978155092	CV_mean_number	4.342568737130753	0	NA	NA	NA	NA	NA	NA	NA	NA	NA
I	I:1823335	1823335	C	T	0.488889	0.03678	0.0553099	0.506063	0.2957954142882131	CV_mean_number	4.342568737130753	0	NA	NA	NA	NA	NA	NA	NA	NA	NA
I	I:1825779	1825779	A	G	0.0571429	0.0637741	0.119143	0.592462	0.2273394996968478	CV_mean_number	4.342568737130753	0	NA	NA	NA	NA	NA	NA	NA	NA	NA
I	I:1826318	1826318	A	T	0.0603175	-0.0793369	0.116128	0.49449	0.305842486652711	CV_mean_number	4.342568737130753	0	NA	NA	NA	NA	NA	NA	NA	NA	NA
I	I:1827838	1827838	G	A	0.15873	0.128549	0.0753643	0.0880633	1.055205044234916	CV_mean_number	4.342568737130753	0	NA	NA	NA	NA	NA	NA	NA	NA	NA
I	I:1829469	1829469	A	C	0.279365	0.0516301	0.0615945	0.401904	0.3958776714161193	CV_mean_number	4.342568737130753	0	NA	NA	NA	NA	NA	NA	NA	NA	NA
I	I:1829726	1829726	G	A	0.196825	0.0491165	0.0695314	0.479944	0.3188094332698133	CV_mean_number	4.342568737130753	0	NA	NA	NA	NA	NA	NA	NA	NA	NA
I	I:1834852	1834852	C	A	0.361905	0.111488	0.0572289	0.0514011	1.2890275868642898	CV_mean_number	4.342568737130753	0	NA	NA	NA	NA	NA	NA	NA	NA	NA
I	I:1835459	1835459	G	A	0.0920635	0.0754993	0.0956023	0.42969	0.36684475335671685	CV_mean_number	4.342568737130753	0	NA	NA	NA	NA	NA	NA	NA	NA	NA
I	I:1836131	1836131	A	G	0.0888889	-0.180769	0.0966832	0.0615256	1.2109441423481415	CV_mean_number	4.342568737130753	0	NA	NA	NA	NA	NA	NA	NA	NA	NA
I	I:1836887	1836887	G	A	0.206349	0.112912	0.06807	0.0971636	1.012496402562145	CV_mean_number	4.342568737130753	0	NA	NA	NA	NA	NA	NA	NA	NA	NA
I	I:1840800	1840800	C	T	0.330159	0.0395942	0.0587909	0.500646	0.30046924935752367	CV_mean_number	4.342568737130753	0	NA	NA	NA	NA	NA	NA	NA	NA	NA
I	I:1844364	1844364	G	T	0.0920635	-0.0855669	0.0955752	0.370636	0.4310523997984842	CV_mean_number	4.342568737130753	0	NA	NA	NA	NA	NA	NA	NA	NA	NA
I	I:1845174	1845174	C	T	0.431746	0.0862175	0.0556452	0.121282	0.9162036499227568	CV_mean_number	4.342568737130753	0	NA	NA	NA	NA	NA	NA	NA	NA	NA
I	I:1845215	1845215	T	C	0.32381	0.143604	0.0585682	0.0142098	1.847412034634644	CV_mean_number	4.342568737130753	0	NA	NA	NA	NA	NA	NA	NA	NA	NA
I	I:1846045	1846045	A	G	0.146032	0.0884679	0.0781882	0.257856	0.588622758627735	CV_mean_number	4.342568737130753	0	NA	NA	NA	NA	NA	NA	NA	NA	NA
I	I:1858436	1858436	T	C	0.225397	0.125747	0.0658328	0.0561206	1.2508776944630613	CV_mean_number	4.342568737130753	0	NA	NA	NA	NA	NA	NA	NA	NA	NA
I	I:1859641	1859641	G	A	0.488889	-0.0498922	0.0552771	0.366747	0.4356334300103089	CV_mean_number	4.342568737130753	0	NA	NA	NA	NA	NA	NA	NA	NA	NA
I	I:1861201	1861201	A	G	0.0920635	-0.158567	0.0952769	0.0960577	1.0174678162944626	CV_mean_number	4.342568737130753	0	NA	NA	NA	NA	NA	NA	NA	NA	NA
I	I:1861893	1861893	T	C	0.0571429	0.00359583	0.119198	0.975934	0.010579551600728654	CV_mean_number	4.342568737130753	0	NA	NA	NA	NA	NA	NA	NA	NA	NA
I	I:1862866	1862866	C	T	0.234921	0.0125899	0.0652578	0.847018	0.07210736036868994	CV_mean_number	4.342568737130753	0	NA	NA	NA	NA	NA	NA	NA	NA	NA
I	I:1863579	1863579	A	G	0.0888889	0.081628	0.0971121	0.400598	0.3972912232679344	CV_mean_number	4.342568737130753	0	NA	NA	NA	NA	NA	NA	NA	NA	NA
I	I:1873767	1873767	A	T	0.0698413	-0.0500192	0.108515	0.64484	0.19054803069354967	CV_mean_number	4.342568737130753	0	NA	NA	NA	NA	NA	NA	NA	NA	NA
I	I:1874558	1874558	T	C	0.136508	-0.114265	0.0803276	0.154885	0.8099906399081029	CV_mean_number	4.342568737130753	0	NA	NA	NA	NA	NA	NA	NA	NA	NA
I	I:1874805	1874805	T	G	0.295238	0.11373	0.0603131	0.0593403	1.2266502624004505	CV_mean_number	4.342568737130753	0	NA	NA	NA	NA	NA	NA	NA	NA	NA
I	I:1875698	1875698	T	C	0.250794	-0.0219239	0.0638163	0.731186	0.135972132620169	CV_mean_number	4.342568737130753	0	NA	NA	NA	NA	NA	NA	NA	NA	NA
I	I:1876381	1876381	G	A	0.177778	0.13277	0.0719765	0.0650917	1.1864743858405404	CV_mean_number	4.342568737130753	0	NA	NA	NA	NA	NA	NA	NA	NA	NA
I	I:1876789	1876789	A	T	0.171429	0.0235953	0.0733996	0.74786	0.12617969480683675	CV_mean_number	4.342568737130753	0	NA	NA	NA	NA	NA	NA	NA	NA	NA
I	I:1876790	1876790	T	A	0.225397	0.110257	0.0659214	0.0944169	1.024950262907046	CV_mean_number	4.342568737130753	0	NA	NA	NA	NA	NA	NA	NA	NA	NA
I	I:1878171	1878171	A	T	0.35873	0.0211613	0.0576733	0.713681	0.146495865110795	CV_mean_number	4.342568737130753	0	NA	NA	NA	NA	NA	NA	NA	NA	NA
I	I:1878887	1878887	G	C	0.374603	0.0972027	0.0568975	0.0875654	1.0576674641222767	CV_mean_number	4.342568737130753	0	NA	NA	NA	NA	NA	NA	NA	NA	NA
I	I:1879720	1879720	A	T	0.0634921	-0.0658293	0.113403	0.561583	0.2505860474557775	CV_mean_number	4.342568737130753	0	NA	NA	NA	NA	NA	NA	NA	NA	NA
I	I:1880625	1880625	G	A	0.466667	0.0290429	0.0554344	0.600338	0.2216041659428193	CV_mean_number	4.342568737130753	0	NA	NA	NA	NA	NA	NA	NA	NA	NA
I	I:1881920	1881920	A	G	0.104762	0.10964	0.0901316	0.223815	0.6501108105738586	CV_mean_number	4.342568737130753	0	NA	NA	NA	NA	NA	NA	NA	NA	NA
I	I:1883323	1883323	C	G	0.238095	-0.164434	0.0642917	0.0105392	1.9771923539025615	CV_mean_number	4.342568737130753	0	NA	NA	NA	NA	NA	NA	NA	NA	NA
I	I:1883531	1883531	T	A	0.15873	-0.140316	0.0752972	0.0623918	1.2048724848169698	CV_mean_number	4.342568737130753	0	NA	NA	NA	NA	NA	NA	NA	NA	NA
I	I:1883618	1883618	T	G	0.133333	0.0479314	0.081346	0.555707	0.25515413256098385	CV_mean_number	4.342568737130753	0	NA	NA	NA	NA	NA	NA	NA	NA	NA
I	I:1884419	1884419	T	C	0.247619	-0.0758648	0.0639569	0.235549	0.6279187351761351	CV_mean_number	4.342568737130753	0	NA	NA	NA	NA	NA	NA	NA	NA	NA
I	I:1892241	1892241	C	T	0.0888889	0.00168581	0.0972216	0.986165	0.006050415084743802	CV_mean_number	4.342568737130753	0	NA	NA	NA	NA	NA	NA	NA	NA	NA
I	I:1902516	1902516	A	C	0.0857143	-0.149589	0.0984713	0.128734	0.8903067362169527	CV_mean_number	4.342568737130753	0	NA	NA	NA	NA	NA	NA	NA	NA	NA
I	I:1907670	1907670	T	C	0.298413	-0.0732379	0.0603257	0.224732	0.6483350831930911	CV_mean_number	4.342568737130753	0	NA	NA	NA	NA	NA	NA	NA	NA	NA
I	I:1911932	1911932	A	G	0.485714	-0.00679744	0.0553566	0.90227	0.04466348245396889	CV_mean_number	4.342568737130753	0	NA	NA	NA	NA	NA	NA	NA	NA	NA
I	I:1916325	1916325	A	C	0.0571429	-0.048799	0.119166	0.682169	0.1661080202479396	CV_mean_number	4.342568737130753	0	NA	NA	NA	NA	NA	NA	NA	NA	NA
I	I:1916879	1916879	A	G	0.466667	-0.00101058	0.0554586	0.985462	0.006360117714821763	CV_mean_number	4.342568737130753	0	NA	NA	NA	NA	NA	NA	NA	NA	NA
I	I:1931884	1931884	T	C	0.0603175	-0.205118	0.115635	0.0760887	1.1186798358974706	CV_mean_number	4.342568737130753	0	NA	NA	NA	NA	NA	NA	NA	NA	NA
I	I:1934528	1934528	G	T	0.457143	-0.0252124	0.0555214	0.649755	0.1872503698276354	CV_mean_number	4.342568737130753	0	NA	NA	NA	NA	NA	NA	NA	NA	NA
I	I:1942073	1942073	G	A	0.495238	0.0226194	0.055323	0.682643	0.16580635878438457	CV_mean_number	4.342568737130753	0	NA	NA	NA	NA	NA	NA	NA	NA	NA
I	I:1948337	1948337	G	A	0.361905	0.0422426	0.0575253	0.462747	0.33465638810756826	CV_mean_number	4.342568737130753	0	NA	NA	NA	NA	NA	NA	NA	NA	NA
I	I:1958809	1958809	A	T	0.31746	-0.076372	0.0592809	0.197639	0.7041273521899301	CV_mean_number	4.342568737130753	0	NA	NA	NA	NA	NA	NA	NA	NA	NA
I	I:1969878	1969878	C	T	0.495238	-0.0361483	0.0553001	0.513321	0.28961096835649086	CV_mean_number	4.342568737130753	0	NA	NA	NA	NA	NA	NA	NA	NA	NA
I	I:1972102	1972102	G	T	0.0888889	-0.151748	0.0968425	0.117125	0.9313503961041653	CV_mean_number	4.342568737130753	0	NA	NA	NA	NA	NA	NA	NA	NA	NA
I	I:1973720	1973720	G	C	0.206349	0.0768847	0.0682302	0.259809	0.5853458086800929	CV_mean_number	4.342568737130753	0	NA	NA	NA	NA	NA	NA	NA	NA	NA
I	I:1973889	1973889	C	T	0.384127	-0.0482882	0.0568184	0.395398	0.4029655317627626	CV_mean_number	4.342568737130753	0	NA	NA	NA	NA	NA	NA	NA	NA	NA
I	I:1973940	1973940	A	G	0.444444	0.0201557	0.0556684	0.717301	0.14429856370773975	CV_mean_number	4.342568737130753	0	NA	NA	NA	NA	NA	NA	NA	NA	NA
I	I:1978163	1978163	C	T	0.253968	3.47298e-4	0.0635629	0.99564	0.0018976638610393999	CV_mean_number	4.342568737130753	0	NA	NA	NA	NA	NA	NA	NA	NA	NA
I	I:1978169	1978169	A	G	0.161905	0.126472	0.0747687	0.0907399	1.0422017036844182	CV_mean_number	4.342568737130753	0	NA	NA	NA	NA	NA	NA	NA	NA	NA
I	I:1978177	1978177	T	G	0.0984127	0.0803583	0.0927733	0.386392	0.4129718739538065	CV_mean_number	4.342568737130753	0	NA	NA	NA	NA	NA	NA	NA	NA	NA
I	I:1981352	1981352	A	T	0.114286	-0.160826	0.0864855	0.0629471	1.2010242732290155	CV_mean_number	4.342568737130753	0	NA	NA	NA	NA	NA	NA	NA	NA	NA
I	I:1988317	1988317	G	A	0.0698413	-0.0671823	0.108486	0.535736	0.2710491692402908	CV_mean_number	4.342568737130753	0	NA	NA	NA	NA	NA	NA	NA	NA	NA
I	I:1989067	1989067	A	G	0.333333	-0.0491104	0.0586263	0.402207	0.3955503752238154	CV_mean_number	4.342568737130753	0	NA	NA	NA	NA	NA	NA	NA	NA	NA
I	I:1989103	1989103	C	T	0.346032	0.0705666	0.0580246	0.223928	0.6498915987603986	CV_mean_number	4.342568737130753	0	NA	NA	NA	NA	NA	NA	NA	NA	NA
I	I:1996959	1996959	C	T	0.0825397	0.00227913	0.100542	0.981915	0.007926105521299248	CV_mean_number	4.342568737130753	0	NA	NA	NA	NA	NA	NA	NA	NA	NA
I	I:1997707	1997707	C	T	0.0603175	-0.0461056	0.116185	0.691494	0.1602115838528576	CV_mean_number	4.342568737130753	0	NA	NA	NA	NA	NA	NA	NA	NA	NA
I	I:1999736	1999736	T	G	0.107937	0.102643	0.0889752	0.248656	0.6044010569004755	CV_mean_number	4.342568737130753	0	NA	NA	NA	NA	NA	NA	NA	NA	NA
I	I:2009926	2009926	A	G	0.136508	-0.11419	0.0803279	0.155159	0.809223028091583	CV_mean_number	4.342568737130753	0	NA	NA	NA	NA	NA	NA	NA	NA	NA
I	I:2011482	2011482	G	A	0.48254	0.00563371	0.0553681	0.918955	0.03670575491441248	CV_mean_number	4.342568737130753	0	NA	NA	NA	NA	NA	NA	NA	NA	NA
I	I:2013029	2013029	C	A	0.126984	-0.0421156	0.0830631	0.612133	0.2131542071180557	CV_mean_number	4.342568737130753	0	NA	NA	NA	NA	NA	NA	NA	NA	NA
I	I:2016939	2016939	A	G	0.263492	0.153287	0.0622053	0.0137315	1.8622820187617517	CV_mean_number	4.342568737130753	0	NA	NA	NA	NA	NA	NA	NA	NA	NA
I	I:2017779	2017779	A	G	0.0539683	-0.0634208	0.122395	0.604344	0.2187157852624464	CV_mean_number	4.342568737130753	0	NA	NA	NA	NA	NA	NA	NA	NA	NA
I	I:2019326	2019326	T	G	0.0952381	-6.74652e-4	0.094254	0.994289	0.0024873652375195327	CV_mean_number	4.342568737130753	0	NA	NA	NA	NA	NA	NA	NA	NA	NA
I	I:2020050	2020050	T	C	0.447619	0.00262736	0.0556413	0.962338	0.016672364809151685	CV_mean_number	4.342568737130753	0	NA	NA	NA	NA	NA	NA	NA	NA	NA
I	I:2023053	2023053	A	G	0.352381	0.00119212	0.057917	0.983578	0.0071911938266257785	CV_mean_number	4.342568737130753	0	NA	NA	NA	NA	NA	NA	NA	NA	NA
I	I:2024319	2024319	G	A	0.0698413	-0.0232246	0.108544	0.830575	0.0806211451325303	CV_mean_number	4.342568737130753	0	NA	NA	NA	NA	NA	NA	NA	NA	NA
I	I:2024674	2024674	C	T	0.0888889	-0.0787342	0.0971197	0.417542	0.3792998328730213	CV_mean_number	4.342568737130753	0	NA	NA	NA	NA	NA	NA	NA	NA	NA
I	I:2025524	2025524	C	T	0.120635	-0.103573	0.0847456	0.221645	0.6543420613278861	CV_mean_number	4.342568737130753	0	NA	NA	NA	NA	NA	NA	NA	NA	NA
I	I:2029698	2029698	A	T	0.101587	-0.0720612	0.0914923	0.430919	0.36560435665834934	CV_mean_number	4.342568737130753	0	NA	NA	NA	NA	NA	NA	NA	NA	NA
I	I:2033615	2033615	A	T	0.0698413	-0.0550298	0.108507	0.612048	0.21321451687783974	CV_mean_number	4.342568737130753	0	NA	NA	NA	NA	NA	NA	NA	NA	NA
I	I:2039518	2039518	T	C	0.0666667	-0.0739587	0.110839	0.504603	0.297050171813742	CV_mean_number	4.342568737130753	0	NA	NA	NA	NA	NA	NA	NA	NA	NA
I	I:2041286	2041286	A	G	0.0825397	0.0855578	0.100426	0.394241	0.40423821225385076	CV_mean_number	4.342568737130753	0	NA	NA	NA	NA	NA	NA	NA	NA	NA
I	I:2057453	2057453	C	T	0.495238	-0.0263788	0.0553177	0.633462	0.19827943237532689	CV_mean_number	4.342568737130753	0	NA	NA	NA	NA	NA	NA	NA	NA	NA
I	I:2058361	2058361	T	C	0.152381	0.162262	0.0764368	0.0337685	1.4714882303385652	CV_mean_number	4.342568737130753	0	NA	NA	NA	NA	NA	NA	NA	NA	NA
I	I:2058581	2058581	C	T	0.24127	-0.0138764	0.0646614	0.830078	0.08088109632516378	CV_mean_number	4.342568737130753	0	NA	NA	NA	NA	NA	NA	NA	NA	NA
I	I:2062734	2062734	A	T	0.120635	0.0880672	0.0848016	0.299034	0.5242794298263758	CV_mean_number	4.342568737130753	0	NA	NA	NA	NA	NA	NA	NA	NA	NA
I	I:2067700	2067700	T	C	0.0857143	-0.034501	0.0988144	0.726977	0.13847932907369095	CV_mean_number	4.342568737130753	0	NA	NA	NA	NA	NA	NA	NA	NA	NA
I	I:2068166	2068166	A	T	0.409524	0.00786898	0.0562624	0.888769	0.051211101866166335	CV_mean_number	4.342568737130753	0	NA	NA	NA	NA	NA	NA	NA	NA	NA
I	I:2073189	2073189	G	A	0.27619	0.155594	0.0612526	0.011079	1.9554994376293588	CV_mean_number	4.342568737130753	0	NA	NA	NA	NA	NA	NA	NA	NA	NA
I	I:2078066	2078066	A	C	0.488889	-0.0181885	0.0553394	0.742404	0.12935969684678095	CV_mean_number	4.342568737130753	0	NA	NA	NA	NA	NA	NA	NA	NA	NA
I	I:2086667	2086667	C	T	0.0888889	-0.0724111	0.0971354	0.45599	0.3410446814417925	CV_mean_number	4.342568737130753	0	NA	NA	NA	NA	NA	NA	NA	NA	NA
I	I:2088716	2088716	T	G	0.0984127	-0.135081	0.0925701	0.144503	0.8401231365065949	CV_mean_number	4.342568737130753	0	NA	NA	NA	NA	NA	NA	NA	NA	NA
I	I:2089106	2089106	T	C	0.0666667	-0.0739587	0.110839	0.504603	0.297050171813742	CV_mean_number	4.342568737130753	0	NA	NA	NA	NA	NA	NA	NA	NA	NA
I	I:2089626	2089626	T	C	0.187302	-0.0535225	0.0708502	0.44999	0.34679713732037787	CV_mean_number	4.342568737130753	0	NA	NA	NA	NA	NA	NA	NA	NA	NA
I	I:2089675	2089675	T	C	0.126984	-0.0499188	0.0830493	0.547791	0.26138510731835857	CV_mean_number	4.342568737130753	0	NA	NA	NA	NA	NA	NA	NA	NA	NA
I	I:2092530	2092530	G	T	0.24127	0.101216	0.0644126	0.116096	0.9351827432920363	CV_mean_number	4.342568737130753	0	NA	NA	NA	NA	NA	NA	NA	NA	NA
I	I:2093221	2093221	A	T	0.285714	0.0774595	0.0610882	0.2048	0.6886700476962069	CV_mean_number	4.342568737130753	0	NA	NA	NA	NA	NA	NA	NA	NA	NA
I	I:2093294	2093294	A	G	0.339683	0.022437	0.0584059	0.700862	0.15436748636785677	CV_mean_number	4.342568737130753	0	NA	NA	NA	NA	NA	NA	NA	NA	NA
I	I:2093341	2093341	C	G	0.0603175	-0.0461056	0.116185	0.691494	0.1602115838528576	CV_mean_number	4.342568737130753	0	NA	NA	NA	NA	NA	NA	NA	NA	NA
I	I:2093842	2093842	G	A	0.155556	0.165671	0.075762	0.0287619	1.5411824280158533	CV_mean_number	4.342568737130753	0	NA	NA	NA	NA	NA	NA	NA	NA	NA
I	I:2095395	2095395	G	A	0.104762	-0.0647676	0.0902702	0.473075	0.32507000195973146	CV_mean_number	4.342568737130753	0	NA	NA	NA	NA	NA	NA	NA	NA	NA
I	I:2100488	2100488	T	G	0.339683	-0.0904254	0.0581957	0.120228	0.9199943773467697	CV_mean_number	4.342568737130753	0	NA	NA	NA	NA	NA	NA	NA	NA	NA
I	I:2100656	2100656	T	C	0.488889	0.0996122	0.0550618	0.070436	1.152205315215452	CV_mean_number	4.342568737130753	0	NA	NA	NA	NA	NA	NA	NA	NA	NA
I	I:2100737	2100737	T	A	0.133333	-0.113884	0.0811361	0.160434	0.7947035883733675	CV_mean_number	4.342568737130753	0	NA	NA	NA	NA	NA	NA	NA	NA	NA
I	I:2102101	2102101	T	C	0.0952381	0.0628586	0.094187	0.504529	0.2971138657442059	CV_mean_number	4.342568737130753	0	NA	NA	NA	NA	NA	NA	NA	NA	NA
I	I:2102313	2102313	T	C	0.488889	0.0172909	0.0553403	0.754701	0.12222507455584698	CV_mean_number	4.342568737130753	0	NA	NA	NA	NA	NA	NA	NA	NA	NA
I	I:2108680	2108680	A	C	0.142857	-0.0619609	0.0789893	0.432793	0.3637197721296713	CV_mean_number	4.342568737130753	0	NA	NA	NA	NA	NA	NA	NA	NA	NA
I	I:2110467	2110467	C	G	0.15873	-0.0322835	0.0756918	0.669735	0.17409700446880833	CV_mean_number	4.342568737130753	0	NA	NA	NA	NA	NA	NA	NA	NA	NA
I	I:2112458	2112458	A	G	0.107937	0.107744	0.0889559	0.225818	0.6462414433273191	CV_mean_number	4.342568737130753	0	NA	NA	NA	NA	NA	NA	NA	NA	NA
I	I:2113910	2113910	G	A	0.165079	0.00437896	0.0745248	0.953145	0.02084102600419297	CV_mean_number	4.342568737130753	0	NA	NA	NA	NA	NA	NA	NA	NA	NA
I	I:2119570	2119570	G	A	0.438095	0.00463339	0.0557637	0.93378	0.02975543216432199	CV_mean_number	4.342568737130753	0	NA	NA	NA	NA	NA	NA	NA	NA	NA
I	I:2119977	2119977	A	T	0.0857143	0.0745986	0.0987436	0.449962	0.3468241615294406	CV_mean_number	4.342568737130753	0	NA	NA	NA	NA	NA	NA	NA	NA	NA
I	I:2124855	2124855	G	A	0.0666667	-0.0739587	0.110839	0.504603	0.297050171813742	CV_mean_number	4.342568737130753	0	NA	NA	NA	NA	NA	NA	NA	NA	NA
I	I:2138645	2138645	A	G	0.374603	-0.0839224	0.056965	0.14069	0.851736770363121	CV_mean_number	4.342568737130753	0	NA	NA	NA	NA	NA	NA	NA	NA	NA
I	I:2143954	2143954	A	T	0.260317	-0.0360083	0.063019	0.567736	0.24585356639525835	CV_mean_number	4.342568737130753	0	NA	NA	NA	NA	NA	NA	NA	NA	NA
I	I:2143993	2143993	A	G	0.238095	0.157805	0.0643448	0.014187	1.8481094312649113	CV_mean_number	4.342568737130753	0	NA	NA	NA	NA	NA	NA	NA	NA	NA
I	I:2153841	2153841	C	A	0.219048	-0.00968502	0.0668923	0.88488	0.05311562068227746	CV_mean_number	4.342568737130753	0	NA	NA	NA	NA	NA	NA	NA	NA	NA
I	I:2153867	2153867	T	A	0.352381	-0.0238561	0.0579013	0.68033	0.16728037786025943	CV_mean_number	4.342568737130753	0	NA	NA	NA	NA	NA	NA	NA	NA	NA
I	I:2157371	2157371	T	C	0.2	0.10784	0.0689	0.117543	0.9298032291668038	CV_mean_number	4.342568737130753	0	NA	NA	NA	NA	NA	NA	NA	NA	NA
I	I:2162191	2162191	G	T	0.492063	-0.0353982	0.0553061	0.522146	0.282208044643812	CV_mean_number	4.342568737130753	0	NA	NA	NA	NA	NA	NA	NA	NA	NA
I	I:2162932	2162932	T	A	0.466667	-0.0810104	0.0552693	0.142719	0.8455182059612495	CV_mean_number	4.342568737130753	0	NA	NA	NA	NA	NA	NA	NA	NA	NA
I	I:2170282	2170282	T	G	0.203175	-0.016479	0.0687569	0.810586	0.09120090142735392	CV_mean_number	4.342568737130753	0	NA	NA	NA	NA	NA	NA	NA	NA	NA
I	I:2172048	2172048	T	A	0.380952	-0.0867346	0.0567624	0.126505	0.8978923090376005	CV_mean_number	4.342568737130753	0	NA	NA	NA	NA	NA	NA	NA	NA	NA
I	I:2179331	2179331	G	A	0.0730159	0.168707	0.105919	0.111208	0.9538639696704686	CV_mean_number	4.342568737130753	0	NA	NA	NA	NA	NA	NA	NA	NA	NA
I	I:2183613	2183613	G	C	0.0857143	-0.17127	0.0983583	0.0816328	1.0881353069711874	CV_mean_number	4.342568737130753	0	NA	NA	NA	NA	NA	NA	NA	NA	NA
I	I:2187602	2187602	G	T	0.466667	-0.0891723	0.0552292	0.1064	0.9730583720409707	CV_mean_number	4.342568737130753	0	NA	NA	NA	NA	NA	NA	NA	NA	NA
I	I:2190014	2190014	G	T	0.111111	0.0496427	0.0879932	0.572642	0.24211680214168096	CV_mean_number	4.342568737130753	0	NA	NA	NA	NA	NA	NA	NA	NA	NA
I	I:2190063	2190063	C	T	0.412698	-0.0949158	0.0559419	0.0897562	1.0469355423843203	CV_mean_number	4.342568737130753	0	NA	NA	NA	NA	NA	NA	NA	NA	NA
I	I:2192695	2192695	G	T	0.0507937	0.0220501	0.125999	0.861078	0.06495750657738492	CV_mean_number	4.342568737130753	0	NA	NA	NA	NA	NA	NA	NA	NA	NA
I	I:2199094	2199094	A	T	0.250794	-0.00975166	0.0638259	0.878568	0.0562246190498813	CV_mean_number	4.342568737130753	0	NA	NA	NA	NA	NA	NA	NA	NA	NA
I	I:2201824	2201824	C	T	0.301587	-0.0036518	0.0602847	0.951697	0.02150129969715617	CV_mean_number	4.342568737130753	0	NA	NA	NA	NA	NA	NA	NA	NA	NA
I	I:2210363	2210363	G	A	0.0888889	0.136904	0.0969132	0.157761	0.8020003495307452	CV_mean_number	4.342568737130753	0	NA	NA	NA	NA	NA	NA	NA	NA	NA
I	I:2211566	2211566	C	T	0.114286	-0.134721	0.0866279	0.119907	0.9211554626673367	CV_mean_number	4.342568737130753	0	NA	NA	NA	NA	NA	NA	NA	NA	NA
I	I:2212164	2212164	A	C	0.0507937	0.0892377	0.125904	0.478463	0.3201516409950288	CV_mean_number	4.342568737130753	0	NA	NA	NA	NA	NA	NA	NA	NA	NA
I	I:2216296	2216296	A	G	0.180952	0.164004	0.0712676	0.0213776	1.6700410533490708	CV_mean_number	4.342568737130753	0	NA	NA	NA	NA	NA	NA	NA	NA	NA
I	I:2219230	2219230	C	A	0.0571429	-0.115584	0.119019	0.331477	0.4795466003500627	CV_mean_number	4.342568737130753	0	NA	NA	NA	NA	NA	NA	NA	NA	NA
I	I:2222269	2222269	T	C	0.206349	-0.0900121	0.0681789	0.186757	0.728723111041886	CV_mean_number	4.342568737130753	0	NA	NA	NA	NA	NA	NA	NA	NA	NA
I	I:2225016	2225016	A	T	0.161905	-0.0952145	0.0749166	0.20375	0.6909023825879859	CV_mean_number	4.342568737130753	0	NA	NA	NA	NA	NA	NA	NA	NA	NA
I	I:2225524	2225524	T	G	0.250794	-0.00975166	0.0638259	0.878568	0.0562246190498813	CV_mean_number	4.342568737130753	0	NA	NA	NA	NA	NA	NA	NA	NA	NA
I	I:2226458	2226458	C	T	0.0888889	0.136904	0.0969132	0.157761	0.8020003495307452	CV_mean_number	4.342568737130753	0	NA	NA	NA	NA	NA	NA	NA	NA	NA
I	I:2230008	2230008	C	G	0.168254	0.128978	0.0735994	0.0796997	1.098543313341526	CV_mean_number	4.342568737130753	0	NA	NA	NA	NA	NA	NA	NA	NA	NA
I	I:2231400	2231400	A	G	0.184127	-0.168736	0.0707442	0.0170719	1.7677181418263173	CV_mean_number	4.342568737130753	0	NA	NA	NA	NA	NA	NA	NA	NA	NA
I	I:2236111	2236111	C	T	0.0698413	-0.0544502	0.108508	0.615803	0.21055819968051137	CV_mean_number	4.342568737130753	0	NA	NA	NA	NA	NA	NA	NA	NA	NA
I	I:2237686	2237686	C	T	0.209524	-0.0977416	0.0677598	0.14917	0.8263185102715412	CV_mean_number	4.342568737130753	0	NA	NA	NA	NA	NA	NA	NA	NA	NA
I	I:2238378	2238378	T	C	0.0634921	0.14461	0.113169	0.201311	0.6961324938208338	CV_mean_number	4.342568737130753	0	NA	NA	NA	NA	NA	NA	NA	NA	NA
[truncated: 27,253 more rows]
