# Supplementary material for: Natural variation in the Caenorhabditis elegans egg-laying circuit modulates an intergenerational fitness trade-off
Source: eLife. 2024 Apr 2;12:RP88253. doi: 10.7554/eLife.88253 (PMC10987095; doi:10.7554/eLife.88253)
Supplement: Figure 3—figure supplement 1—source data 1. [file elife-88253-fig3-figsupp1-data1.xlsx]

## Sheet: Figure 3-supplement1B
Class	Strain	length (µm)	width (µm)	volume (µm3)
Class II	N2	58.49	33.12	33591.2
Class II	N2	56.51	30.77	28011.1
Class II	N2	55.92	34.95	35767.4
Class II	N2	53.13	35.9	35849.4
Class II	N2	52.57	36.5	36676.9
Class II	N2	56.42	36.71	39822.1
Class II	N2	53.92	33.41	31515.5
Class II	N2	53.35	34.2	32669.5
Class II	N2	53.59	34.5	33392.1
Class II	N2	53.44	33.8	31962.7
Class II	N2	53.65	32.75	30127.7
Class II	N2	53.92	33.99	32627
Class II	N2	52.91	34.84	33622.7
Class II	N2	54.4	34.64	34184.6
Class II	N2	52.04	34.08	31648.1
Class II	N2	53.88	31.58	28130.9
Class II	N2	52.04	32.8	29310.3
Class II	N2	56.03	30.88	27967.7
Class II	N2	50.94	31.03	25687.1
Class II	N2	53.31	39	42448.8
Class II	N2	51.69	36.76	36579.6
Class II	N2	53.35	30.1	25307.2
Class II	N2	55.8	34.47	34709.5
Class II	N2	52.52	35.32	34303.1
Class II	N2	51.72	33.92	31150.4
Class II	N2	49.56	35.26	32266.9
Class II	N2	49.67	32.02	26666.2
Class II	N2	55.47	35.5	36594.4
Class II	N2	56.71	36.43	39396.5
Class II	N2	51.09	31.15	25961.5
Class II	N2	51.11	33.05	29236.5
Class II	N2	51.39	32.06	27653.7
Class II	N2	53.38	33.27	30937.5
Class II	N2	52.33	31.04	26400.9
Class II	N2	53.38	35.02	34269.4
Class II	N2	53.03	33.72	31574
Class II	N2	57.15	35.48	37656.2
Class II	N2	55.67	35.38	36478.7
Class II	N2	52.37	35.42	34406.4
Class II	N2	52.54	33.02	29993
Class II	N2	54.99	34.54	34347.3
Class II	N2	54.87	34.24	33682.8
Class II	N2	54.02	34.1	32894.7
Class II	N2	48.16	32.63	26858.3
Class II	N2	50.83	33.54	29944.2
Class II	N2	52.23	30.87	26055.2
Class II	N2	55.9	32.37	30674.1
Class II	N2	47.94	28.86	20908
Class II	N2	54.76	32.65	30567.7
Class II	N2	53.38	32.36	29273.9
Class II	N2	54.96	31.23	28066.5
Class II	N2	51.95	34.56	32490.3
Class II	N2	53.14	35.23	34526.3
Class II	N2	52.53	34.32	32389.7
Class III A	ED3005	54.19	33.76	32342.6
Class III A	ED3005	52.16	34.4	32317.6
Class III A	ED3005	49.92	30.6	24478.3
Class III A	ED3005	51.4	31.28	26325.8
Class III A	ED3005	48.89	36.21	33573.6
Class III A	ED3005	53.52	35.07	34474.1
Class III A	ED3005	51.71	33.5	30377.3
Class III A	ED3005	47.54	31.39	24524.5
Class III A	ED3005	51.84	36.42	35998.4
Class III A	ED3005	51.74	35.5	34149.4
Class III A	ED3005	51.36	32.65	28664.2
Class III A	ED3005	54.79	31.43	28332.2
Class III A	ED3005	51.1	34.97	32712.9
Class III A	ED3005	53.58	35.49	35344.2
Class III A	ED3005	52.39	34.66	32955.5
Class III A	ED3005	55.21	34.31	34040.2
Class III A	ED3005	52.74	33.28	30577.2
Class III A	ED3005	49.45	32.6	27509.6
Class III A	ED3005	52.33	31.11	26516.6
Class III A	ED3005	53.79	32.89	30465.9
Class III A	ED3005	54.35	30.99	27324.5
Class III A	ED3005	45.58	29.87	21291.4
Class III A	ED3005	49.38	30.7	24369.1
Class III A	ED3005	55	33.45	32214.5
Class III A	ED3005	52.51	35.01	33695.2
Class III A	ED3005	46.64	33.08	26730.4
Class III A	ED3005	49.38	35.29	32204
Class III A	ED3005	50.94	33.47	29878.5
Class III A	ED3005	50.27	34.33	31017.9
Class III A	ED3005	46.31	31.68	24341.6
Class III A	ED3005	50.03	31.83	26542.8
Class III A	ED3005	50.79	34.42	31511.6
Class III A	ED3005	49.95	30.89	24960.8
Class III A	ED3005	50.34	29.78	23378.2
Class III A	ED3005	58.46	38.17	44587.5
Class III A	ED3005	55.6	37.64	41251.5
Class III A	ED3005	55.59	36.92	39670.6
Class III A	ED3005	57.07	39.22	45957.9
Class III A	ED3005	55.66	35.61	36951.5
Class III A	ED3005	55.04	36.33	38031.5
Class III A	ED3005	58.83	38.23	45017.1
Class III A	ED3005	49.9	37.32	36399.9
Class III A	ED3005	54.79	31.91	29207.6
Class III A	ED3005	50.97	34.18	31171.4
Class III A	ED3005	53.21	37.71	39615.3
Class III A	ED3005	56.88	38.79	44802.3
Class III A	ED3005	58.38	41.54	52744.3
Class III A	ED3005	52.5	36.24	36109.4
Class III A	ED3005	56.34	34.08	34256.9
Class III A	ED3005	54.63	36.55	38214.4
Class III A	ED3005	53.47	36.38	37051.2
Class III A	JU2829	54.44	32.03	29248
Class III A	JU2829	54.98	34.94	35147.6
Class III A	JU2829	54.18	33.54	31912.7
Class III A	JU2829	54.98	30.71	27139.4
Class III A	JU2829	55.55	35.59	36833.7
Class III A	JU2829	52.6	33.09	30157.3
Class III A	JU2829	53.79	34.43	33395
Class III A	JU2829	52.82	34.33	32584.4
Class III A	JU2829	50.65	35.48	33374.4
Class III A	JU2829	55.25	33.18	31849.9
Class III A	JU2829	54.88	32.8	30918.7
Class III A	JU2829	56.12	33.22	32420.4
Class III A	JU2829	48.93	32.7	27398.5
Class III A	JU2829	55.71	31.54	29020.3
Class III A	JU2829	54.26	32.02	29134
Class III A	JU2829	54.44	31.86	28934.1
Class III A	JU2829	55.82	34.61	35017.1
Class III A	JU2829	53.94	31.03	27189.6
Class III A	JU2829	50.3	31.2	25640.5
Class III A	JU2829	50.61	34.89	32259
Class III A	JU2829	54.4	31.71	28633.8
Class III A	JU2829	47.31	32.85	26735.3
Class III A	JU2829	52.64	33.4	30755
Class III A	JU2829	49.44	32.62	27542
Class III A	JU2829	50.19	32.48	27730.7
Class III A	JU2829	52.21	31.2	26613.2
Class III A	JU2829	56.55	31.69	29738.8
Class III A	JU2829	49.33	30.3	23705.1
Class III A	JU2829	51.11	31.17	26006.1
Class III A	JU2829	52.33	33.84	31372.9
Class III A	JU2829	51.81	34.57	32421.8
Class III A	JU2829	52.94	31.76	27964.1
Class III A	JU2829	53.28	36.24	36632.7
Class III A	JU2829	52.12	35.48	34360.4
Class III A	JU2829	54.92	34.68	34591.8
Class III A	JU2829	54.85	30.68	27028.6
Class III A	JU2829	53.66	31.44	27775.7
Class III A	JU2829	54.37	34.67	34208.6
Class III A	JU2829	52.49	33.75	31308
Class III A	JU2829	52.56	31.61	27493.6
Class III A	JU2829	50.54	32.61	28141.1
Class III A	JU2829	53.44	33.76	31900
Class III A	JU2829	55.91	27.48	22106
Class III A	JU2829	50.39	30.86	25126
Class III A	JU2829	52.69	31.66	27659.5
Class III A	JU2829	55.11	35.47	36306.5
Class III A	JU2829	54.42	30.6	26688.3
Class III A	JU2829	54.75	32.88	31001.5
Class III A	JU2829	51.52	30.89	25735.3
Class III A	JU2829	53.67	31.59	28036.8
Class III A	JU2829	46.88	32.48	25899.3
Class III A	JU2829	52	34.67	32736.2
Class III A	JU2829	54.56	35.01	35015.5
Class III A	JU2829	52.47	29.76	24332.3
Class III A	JU2829	52.5	30.24	25137.6
Class III A	JU2829	53.45	29.35	24117.2
Class III A	JU2829	53.24	29.98	25054.3
Class III A	JU2829	50.46	33.8	30186.7
Class III A	JU2829	54.18	30.78	26876.6
Class III A	JU2829	52.59	34.02	31863.7
Class III A	JU2829	57.29	32.6	31877.5
Class III A	JU2829	52.66	32.9	29837.2
Class I	JU3166	51.96	33.54	30607.2
Class I	JU3166	51.22	33.05	29299.4
Class I	JU3166	54.28	29.6	24904.8
Class I	JU3166	52.99	29.06	23422.3
Class I	JU3166	50.3	30.98	25267.1
Class I	JU3166	50.9	29.48	23162.6
Class I	JU3166	51.18	29.71	23662
Class I	JU3166	51.04	30.13	24265.7
Class I	JU3166	50.84	29.57	23271
Class I	JU3166	48.42	31.93	25855.3
Class I	JU3166	53.04	28.46	22487.1
Class I	JU3166	51.68	32.21	28070.2
Class I	JU3166	55.77	29.42	25273.2
Class I	JU3166	54.89	28	22536.5
Class I	JU3166	45.52	28.81	19777.5
Class I	JU3166	53.02	30.58	25953.9
Class I	JU3166	55.53	31.93	29635.5
Class I	JU3166	50.09	29.42	22697.2
Class I	JU3166	52.89	32.17	28658
Class I	JU3166	48.75	31.97	26087.1
Class I	JU3166	53.74	28	22065.1
Class I	JU3166	51.94	33.24	30051.9
Class I	JU3166	52.5	29.14	23340.7
Class I	JU3166	46.42	31.49	24105.3
Class I	JU3166	49.85	28.77	21599.6
Class I	JU3166	54.37	27.65	21757.5
Class I	JU3166	52.58	30.6	25771.8
Class I	JU3166	51.38	31.08	25995.4
Class I	JU3166	53.71	29.57	24582.5
Class I	JU3166	54.98	29.74	25468.3
Class I	JU3166	53.04	26.95	20171.3
Class I	JU3166	53.45	27.25	20774.4
Class I	JU3166	48.66	30.51	23711
Class I	JU3166	49.67	28.29	20815.3
Class I	JU3166	48.94	29.39	22136.8
Class I	JU3166	48.48	29.8	22539.7
Class I	JU3166	50.35	27.96	20600.8
Class I	JU3166	49.49	27.86	20117.1
Class I	JU3166	55.55	28.46	23560.7
Class I	JU3166	54.57	29.04	24096.3
Class I	JU3166	53.98	30.05	25531.3
Class I	JU3166	52.27	29.79	24280.5
Class I	JU3166	50.18	28.74	21698.3
Class I	JU3166	52.56	31.18	26759.1
Class I	JU3166	50.98	28.51	21704
Class I	JU3166	51.51	30.64	25326.2
Class I	JU3166	51.55	25.5	17553.6
Class I	JU3166	50.24	29.73	23257.1
Class I	JU3166	50.32	34.24	30888.5
Class I	JU3166	54.22	29.48	24672.3
Class I	JU3166	52.71	27.55	20954.2
Class III A	JU830	53.95	32.41	29673.8
Class III A	JU830	52.93	31.56	27605.7
Class III A	JU830	56.32	33.24	32586.8
Class III A	JU830	52.71	32.84	29768.5
Class III A	JU830	54.05	33.63	32018.3
Class III A	JU830	55.48	31.91	29584
Class III A	JU830	52.88	33.14	30418.2
Class III A	JU830	56.83	29.57	26010.2
Class III A	JU830	57.14	33.17	32924.3
Class III A	JU830	55.39	34.19	33903.5
Class III A	JU830	56.14	35.48	36991.5
Class III A	JU830	54.51	30.97	27370.1
Class III A	JU830	54.92	32.12	29675.6
Class III A	JU830	53.72	31.53	27955.4
Class III A	JU830	57.19	33.4	33416.2
Class III A	JU830	55.22	33.98	33383.3
Class III A	JU830	52.89	30.98	26572.4
Class III A	JU830	50.95	33.41	29773
Class III A	JU830	54.18	33.92	32636
Class III A	JU830	50.31	30.99	25293.8
Class III A	JU830	54.53	30.7	26905.3
Class III A	JU830	52.63	30.15	25043.7
Class III A	JU830	55.47	33.56	32712.1
Class III A	JU830	51.28	32.75	28798.1
Class III A	JU830	49.91	28.99	21962.5
Class III A	JU830	51.22	31.94	27357.8
Class III A	JU830	53.07	32.54	29424.1
Class III A	JU830	51.29	31.53	26689.4
Class III A	JU830	55.2	34.05	33507.6
Class III A	JU830	52.53	33.46	30784.5
Class III A	JU830	49.64	32.85	28047.4
Class III A	JU830	53.15	30.29	25527
Class III A	JU830	50.96	27.8	20626.6
Class III A	JU830	56.01	28.05	23073.4
Class III A	JU830	51.78	32.29	28268.1
Class III A	JU830	54.89	32.48	30319.5
Class III A	JU830	50.38	30.79	25011.2
Class III A	JU830	53.59	30.19	25573.2
Class III A	JU830	51.38	31.15	26110.4
Class III A	JU830	53.32	32.98	30362.3
Class III A	JU830	51.16	35.65	34042.3
Class III A	JU830	54.56	32.31	29820.5
Class III A	JU830	48.11	31.94	25693.8
Class III A	JU830	52.12	28.91	22809.6
Class III A	JU830	52.42	36.35	36271.3
Class III A	JU830	53.6	33.22	30968.3
Class III A	JU830	54.16	35.29	35309.4
Class III A	JU830	52.97	30.73	26194.9
Class III A	JU830	55.14	31.2	28107.4
Class III A	JU830	55.26	37.41	40497.2
Class III A	JU440	56.65	32.01	30385.3
Class III A	JU440	53.76	31.74	28352.3
Class III A	JU440	55.94	33	31892.5
Class III A	JU440	52.41	33.46	30723.6
Class III A	JU440	52.44	31.72	27623.9
Class III A	JU440	54.12	29.98	25467.3
Class III A	JU440	54.18	33.2	31275.8
Class III A	JU440	51.07	33.81	30571.2
Class III A	JU440	54.3	29.65	24985.3
Class III A	JU440	51.65	33.86	31010
Class III A	JU440	53.42	29.07	23638.1
Class III A	JU440	54.05	33.24	31272.1
Class III A	JU440	54.06	33.86	32454.8
Class III A	JU440	51.4	32.58	28566.8
Class III A	JU440	55.59	33.37	32408.6
Class III A	JU440	54.42	29.28	24426.6
Class III A	JU440	50.82	31.09	25718.7
Class III A	JU440	56.25	33.64	33327.4
Class III A	JU440	56.47	32.01	30289.6
Class III A	JU440	54.51	32.17	29531.1
Class III A	JU440	54.36	31.21	27719.2
Class III A	JU440	51.7	31.94	27619.7
Class III A	JU440	54.09	34.5	33709.6
Class III A	JU440	51.54	33.77	30771.5
Class III A	JU440	50.97	31.09	25795.2
Class III A	JU440	53.21	31.13	26993.4
Class III A	JU440	53.79	31.03	27112.2
Class III A	JU440	49.8	32.65	27797.7
Class III A	JU440	53.56	33.24	30992.4
Class III A	JU440	53.25	27.25	20698.2
Class III A	JU440	54.05	32.73	30318.4
Class III A	JU440	53.91	32.52	29855.7
Class III A	JU440	52.89	31.74	27894.3
Class III A	JU440	54.44	29.26	24408.4
Class III A	JU440	53.54	30.26	25662.7
Class III A	JU440	51.1	31.53	26591.8
Class III A	JU440	49.04	31.23	25043.4
Class III A	JU440	52.4	28.07	21622
Class III A	JU440	52	29.87	24288.8
Class III A	JU440	52.97	31.65	27775.5
Class III A	JU440	51.65	33.17	29758.2
Class III A	JU440	50.38	30.77	24975.6
Class III A	JU440	51.63	31.21	26328.6
Class III A	JU440	50.39	27.84	20445.4
Class III A	JU440	52.82	34.39	32702.6
Class III A	JU440	54.75	30.91	27399.2
Class III A	JU440	52.82	32.4	29032
Class III A	JU440	52.02	29.77	24139.5
Class III A	JU440	53.64	30.97	26936.3
Class III A	JU440	52.68	33.09	30207.8
Class III A	JU440	48.93	36.92	34926
Class III A	JU440	54.05	31.63	28319.6
Class III A	JU440	52.97	33.62	31341
Class III A	JU440	50.45	29.73	23345
Class III A	JU440	54.83	32.96	31185.1
Class III A	JU440	51.83	31.31	26603.8
Class III A	JU440	54.43	37.66	40409.4
Class III A	JU440	54.51	32.97	31030.3
Class III A	JU440	53.87	30.59	26402
Class III A	JU440	53.49	31.16	27185.3
Class III A	JU440	51.63	33.25	29883.3
Class III A	JU440	52.88	32.53	29304.1
Class III A	JU440	48.38	34.5	30154.1
Class III A	JU440	51.74	33.49	30390.6
Class III A	JU440	52.19	34.98	33440
Class III A	JU440	50.05	30.83	24906
Class III A	JU440	51.92	30.78	25755.8
Class III A	JU440	50.52	30.33	24333.6
Class III A	JU440	52.76	34.06	32042.3
Class I	QG2873	55.76	34.68	35115.4
Class I	QG2873	49.56	31.59	25893.5
Class I	QG2873	51.32	30.83	25536.9
Class I	QG2873	49.33	27.87	20054.8
Class I	QG2873	52.36	32.32	28640.9
Class I	QG2873	56.53	30.59	27693.3
Class I	QG2873	49.82	31.1	25221.3
Class I	QG2873	50.96	38.07	38663.1
Class I	QG2873	58.06	32.39	31903.5
Class I	QG2873	56.71	30.81	28179.4
Class I	QG2873	50.09	28.27	20963.5
Class I	QG2873	56.08	31.76	29611.6
Class I	QG2873	57.46	34.21	35210.6
Class I	QG2873	54.92	33.63	32532.2
Class I	QG2873	52.04	33.55	30679.6
Class I	QG2873	54.19	32.41	29805.1
Class I	QG2873	55.21	32.31	30173.2
Class I	QG2873	56.44	33.55	33254.6
Class I	QG2873	56.77	33.23	32828.9
Class I	QG2873	50.76	30.04	23975.5
Class I	QG2873	53.57	33.69	31845.2
Class I	QG2873	56.35	32.28	30736.9
Class I	QG2873	47.9	32.39	26315
Class I	QG2873	51.62	33.55	30427.7
Class I	QG2873	53.54	32.9	30348.5
Class I	QG2873	53.38	30.01	25166.8
Class I	QG2873	55.88	31.63	29275.7
Class I	QG2873	54.01	30.64	26545.1
Class I	QG2873	52.94	33.89	31829.7
Class I	QG2873	52.26	34.6	32766.2
Class I	QG2873	48.48	32.9	27469
Class I	QG2873	54.46	29.33	24534.7
Class I	QG2873	53.63	33.62	31732.9
Class I	QG2873	54.52	33.6	32218.5
Class I	QG2873	53.67	30.66	26426.7
Class I	QG2873	53.74	30.21	25682
Class I	QG2873	54.93	33.67	32606.4
Class I	QG2873	54.65	32.34	29918
Class I	QG2873	57.62	34.08	35051.4
Class I	QG2873	52.43	32.41	28835.5
Class I	QG2873	57.09	32.25	31090.8
Class I	QG2873	53.25	34.53	33245.6
Class I	QG2873	50.96	33.27	29541.3
Class I	QG2873	52.71	34.28	32435.7
Class I	QG2873	55.64	31.74	29347.7
Class I	QG2873	57.45	33.55	33850.9
Class I	QG2873	51.49	41.63	46733.7
Class I	QG2873	60.21	37.33	43925.2
Class I	QG2873	58.41	35.48	38486.7
Class I	QG2873	55.07	33.9	33137
Class I	QG2873	54.93	35.8	36854.6
Class I	QG2873	55.95	35.8	37552.9
Class I	QG2873	55.49	34.95	35488.3
Class III A	NIC1786	52.33	33.2	30199.4
Class III A	NIC1786	52.21	29.6	23954.4
Class III A	NIC1786	54.41	33.3	31586.3
Class III A	NIC1786	53.03	29.48	24134.8
Class III A	NIC1786	56.27	29.86	26270.8
Class III A	NIC1786	49.77	31.34	25596.7
Class III A	NIC1786	53.57	31.29	27457.7
Class III A	NIC1786	49.63	31.76	26209.4
Class III A	NIC1786	54.61	31.07	27597.8
Class III A	NIC1786	52.64	30.4	25468.9
Class III A	NIC1786	53.21	35.89	35886.3
Class III A	NIC1786	54.74	32.38	30053.1
Class III A	NIC1786	54.18	30.66	26677.4
Class III A	NIC1786	53.38	35.75	35723.7
Class III A	NIC1786	54.64	30.83	27187.7
Class III A	NIC1786	50.22	30.77	24903.9
Class III A	NIC1786	53.92	29.54	24633.7
Class III A	NIC1786	50.79	33.9	30564.7
Class III A	NIC1786	51.11	30.64	25129.9
Class III A	NIC1786	54.26	33.03	30991.8
Class III A	NIC1786	54.36	31.97	29095.3
Class III A	NIC1786	57.43	35.21	37278.4
Class III A	NIC1786	54.83	33.99	33159
Class III A	NIC1786	50.22	31.02	25303.2
Class III A	NIC1786	52.9	28.57	22613.6
Class III A	NIC1786	48.56	29.94	22797.5
Class III A	NIC1786	52.86	35.23	34352.8
Class III A	NIC1786	50.29	32.76	28265.8
Class III A	NIC1786	52.99	31.3	27176.5
Class III A	NIC1786	58.12	33.05	33243.7
Class III A	NIC1786	50.77	32.65	28340.3
Class III A	NIC1786	50.72	30.2	24224.2
Class III A	NIC1786	51.67	32.39	28393.4
Class III A	NIC1786	53.03	31.93	28316.2
Class III A	NIC1786	53.61	29.16	23873
Class III A	NIC1786	53.81	32.96	30617.3
Class III A	NIC1786	54.98	28.74	23773.7
Class III A	NIC1786	43.84	26.72	16390.9
Class III A	NIC1786	52.97	28.09	21881.3
Class III A	NIC1786	51.81	28.85	22571.4
Class III A	NIC1786	49.34	29.73	22832
Class III A	NIC1786	51.79	29.43	23493.8
Class III A	NIC1786	53.43	31.3	27404
Class III A	NIC1786	51.09	28.85	22258.2
Class III A	NIC1786	53.02	28.09	21899.6
Class III A	NIC1786	50.3	28.97	22103.6
Class III A	NIC1786	51.44	28.91	22511.5
Class III A	NIC1786	55.99	31.58	29226.3
Class III A	NIC1786	52.05	32.54	28856.4
Class III A	NIC1786	52.4	31.77	27693.8
Class III B	JU751	55.86	29.44	25359.4
Class III B	JU751	52.1	32.04	28012.9
Class III B	JU751	52.21	31.47	27072.2
Class III B	JU751	50.77	29.48	23107.1
Class III B	JU751	53.97	32.08	29074.8
Class III B	JU751	53.45	30.2	25528.8
Class III B	JU751	55	32.54	30492.5
Class III B	JU751	55.82	29.98	26275.5
Class III B	JU751	53.25	32.64	29703
Class III B	JU751	50.94	32.02	27350.8
Class III B	JU751	54.36	32.01	29161.5
Class III B	JU751	54.56	34.98	34954.8
Class III B	JU751	50.69	33.47	29724.5
Class III B	JU751	53.37	33.04	30510.7
Class III B	JU751	54.19	33.24	31354.4
Class III B	JU751	50.48	32.48	27880.5
Class III B	JU751	51.83	36.67	36487
Class III B	JU751	54.76	34.38	33892
Class III B	JU751	54.8	32.84	30946
Class III B	JU751	53.74	36	36457
Class III B	JU751	52.12	30.78	25855
Class III B	JU751	50.19	30.79	24906.3
Class III B	JU751	53.66	32.89	30390.6
Class III B	JU751	54.67	30.87	27276
Class III B	JU751	52.61	31.88	27999.5
Class III B	JU751	52.64	33.47	30880.9
Class III B	JU751	57.16	35.15	36980.7
Class III B	JU751	52.74	33.13	30307.8
Class III B	JU751	54.48	32.79	30668
Class III B	JU751	53.82	30.17	25642.3
Class III B	JU751	55.65	30.35	26841.7
Class III B	JU751	53.6	32.16	29030
Class III B	JU751	53.83	35.31	35140.1
Class III B	JU751	55.49	33.24	32104.6
Class III B	JU751	52.15	37.03	37431.9
Class III B	JU751	54.1	33.9	32557.5
Class III B	JU751	52.1	30.66	25649.4
Class III B	JU751	55.3	31.47	28672.3
Class III B	JU751	56.32	31.62	29493.7
Class III B	JU751	53	31.82	28092.9
Class III B	JU751	52.96	32.58	29430.8
Class III B	JU751	53.39	33.86	32053.3
Class III B	JU751	49.37	31.3	25319
Class III B	JU751	53.97	32.54	29918.9
Class III B	JU751	54.88	30.07	25979
Class III B	JU751	50.31	31.36	25912
Class III B	JU751	51.97	29.73	24048
Class III B	JU751	53.2	27.44	20980
Class III B	JU751	50.93	32.13	27534.6
Class III B	JU751	53.77	32.71	30117.7
Class III B	NIC1832	52.69	32.66	29417.4
Class III B	NIC1832	51.99	31.61	27193.9
Class III B	NIC1832	52.15	33.05	29829.4
Class III B	NIC1832	52.7	31.76	27840
Class III B	NIC1832	49.62	29.87	23174.5
Class III B	NIC1832	51.25	30.7	25288.2
Class III B	NIC1832	45.99	32.13	24859.4
Class III B	NIC1832	52.63	28.38	22195.4
Class III B	NIC1832	52.17	31.17	26547.2
Class III B	NIC1832	50.31	27.16	19430.7
Class III B	NIC1832	49.97	28.69	21531.7
Class III B	NIC1832	48.75	29.76	22609.2
Class III B	NIC1832	47.23	29.49	21508.1
Class III B	NIC1832	49.61	31.63	25990.8
Class III B	NIC1832	51.22	33.05	29296.4
Class III B	NIC1832	56.25	30.12	26717.3
Class III B	NIC1832	49.49	31.72	26067.2
Class III B	NIC1832	52.94	28.37	22307.8
Class III B	NIC1832	45.19	29.99	21285.4
Class III B	NIC1832	49.36	30.77	24476.6
Class III B	NIC1832	48.46	30.3	23300.3
Class III B	NIC1832	46.31	28.96	20337.7
Class III B	NIC1832	50.66	27.31	19790.9
Class III B	NIC1832	39.56	26.9	14986.3
Class III B	NIC1832	51.78	28.58	22144.4
Class III B	NIC1832	49.79	29.38	22495.6
Class III B	NIC1832	46.44	28.88	20282.9
Class III B	NIC1832	47.8	28.74	20669.4
Class III B	NIC1832	54.24	30.66	26706.1
Class III B	NIC1832	50.39	30.09	23887
Class III B	NIC1832	53.38	35.44	35094.9
Class III B	NIC1832	52.26	31.97	27964.6
Class III B	NIC1832	53.53	33.58	31601.6
Class III B	NIC1832	51.94	32.02	27888.8
Class III B	NIC1832	56.1	32.74	31482.8
Class III B	NIC1832	43.82	29.42	19855.1
Class III B	NIC1832	50.81	34.22	31146.7
Class III B	NIC1832	52.5	30.49	25553.5
Class III B	NIC1832	53.21	31.39	27450.9
Class III B	NIC1832	52.82	33.97	31908.2
Class III B	NIC1832	52.23	29.86	24377.5
Class III B	NIC1832	49.47	32.46	27294.5
Class III B	NIC1832	50.78	35.08	32727.9
Class III B	NIC1832	53.89	29.11	23904.5
Class III B	NIC1832	54.08	32.02	29041.2
Class III B	NIC1832	51.81	32.64	28900.9
Class III B	NIC1832	51.51	30	24274.4
Class III B	NIC1832	56.17	32.5	31062.2
Class III B	NIC1832	49.77	30.68	24526.1
Class III B	NIC1832	53.7	30.96	26954.7
Class III B	JU2593	51.21	32.74	28738.3
Class III B	JU2593	54.66	32.31	29878.6
Class III B	JU2593	55.92	33.37	32604.4
Class III B	JU2593	52.95	33.49	31103.6
Class III B	JU2593	49.56	30.1	23513
Class III B	JU2593	52.47	33.31	30475.3
Class III B	JU2593	51.72	30.01	24392.6
Class III B	JU2593	62.13	31.93	33175.7
Class III B	JU2593	57.69	31.47	29912.5
Class III B	JU2593	57.37	31.63	30053.7
Class III B	JU2593	57.61	32.39	31638.1
Class III B	JU2593	52.24	30.58	25581.5
Class III B	JU2593	53.13	33.99	32132.8
Class III B	JU2593	52.48	34.19	32112.6
Class III B	JU2593	56.38	31.59	29456.2
Class III B	JU2593	54.19	36.12	37019.8
Class III B	JU2593	57.95	33.56	34165.6
Class III B	JU2593	54.22	34.91	34593
Class III B	JU2593	50.08	29.7	23127.9
Class III B	JU2593	52.7	34.05	31997.4
Class III B	JU2593	54.08	29.31	24322.8
Class III B	JU2593	58.25	28.09	24061.3
Class III B	JU2593	60.84	34.84	38680.7
Class III B	JU2593	54.26	34.02	32871.4
Class III B	JU2593	55.89	36.83	39701.3
Class III B	JU2593	59.07	31.74	31169.9
Class III B	JU2593	52.77	31.61	27601.6
Class III B	JU2593	56.79	34.9	36222.1
Class III B	JU2593	57.34	33.2	33100.8
Class III B	JU2593	51.5	35.39	33772.2
Class III B	JU2593	57.69	37.03	41419.3
Class III B	JU2593	57.75	33.04	33008.6
Class III B	JU2593	54.17	34.06	32897.6
Class III B	JU2593	58.85	33.55	34693.1
Class III B	JU2593	55.59	35.5	36681.9
Class III B	JU2593	56.55	36.81	40110.5
Class III B	JU2593	61.16	32.89	34640.3
Class III B	JU2593	59.61	36.15	40784.8
Class III B	JU2593	53.83	32.76	30253.4
Class III B	JU2593	50.18	31.89	26727
Class III B	JU2593	51.99	33.09	29796.7
Class III B	JU2593	50.36	33.47	29533.9
Class III B	JU2593	51.15	35.03	32874.4
Class III B	JU2593	53.57	33.52	31521.7
Class III B	JU2593	56.77	34.52	35422
Class III B	JU2593	55.21	32.17	29927.2
Class III B	JU2593	51.81	32.93	29417.2
Class III B	JU2593	53.28	33.2	30757.9
Class III B	JU2593	51.45	32.52	28495.4
Class III B	JU2593	55.58	31.31	28528.5
Class III B	JU2587	51.18	35.53	33822.3
Class III B	JU2587	54.26	34.8	34407.4
Class III B	JU2587	53.78	33.36	31342.3
Class III B	JU2587	53.95	32.15	29198
Class III B	JU2587	52.28	33.96	31568.8
Class III B	JU2587	54.51	33.86	32731.3
Class III B	JU2587	53.5	32.51	29604.6
Class III B	JU2587	55.23	32.62	30767.8
Class III B	JU2587	56.75	34.42	35207.9
Class III B	JU2587	54.04	31.86	28724.1
Class III B	JU2587	54.26	34.33	33483.2
Class III B	JU2587	49.25	34.26	30266.6
Class III B	JU2587	51.34	30.01	24213.1
Class III B	JU2587	53.5	30.15	25458.4
Class III B	JU2587	57.12	30.99	28730.8
Class III B	JU2587	53.76	33.2	31031
Class III B	JU2587	52.68	36.24	36220.2
Class III B	JU2587	53.6	32.48	29610.5
Class III B	JU2587	53.03	33.22	30638.3
Class III B	JU2587	55.34	33.86	33221.9
Class III B	JU2587	52.23	30.57	25561.3
Class III B	JU2587	50.87	33.75	30333.3
Class III B	JU2587	57.06	37.44	41884.6
Class III B	JU2587	50.76	28.72	21919.9
Class III B	JU2587	49.83	28.51	21212.1
Class III B	JU2587	56.77	34.51	35398
Class III B	JU2587	49.41	32.03	26547.5
Class III B	JU2587	51.36	33.12	29500.4
Class III B	JU2587	54	33.3	31349.5
Class III B	JU2587	55.41	31.43	28657.9
Class III B	JU2587	54.2	33.37	31602.8
Class III B	JU2587	51.21	32.61	28516.1
Class III B	JU2587	55.55	32.16	30082.7
Class III B	JU2587	56.35	30.5	27448.5
Class III B	JU2587	53.67	34.63	33697.9
Class III B	JU2587	54.73	33.2	31585.3
Class III B	JU2587	52.38	32.78	29468.8
Class III B	JU2587	51.68	35.37	33844.1
Class III B	JU2587	52.77	34.04	32015.6
Class III B	JU2587	50.15	31.61	26245.2
Class III B	JU2587	50.79	33.34	29554.3
Class III B	JU2587	53.66	31.73	28286.4
Class III B	JU2587	49.77	31.86	26454.1
Class III B	JU2587	52.59	34.91	33567.9
Class III B	JU2587	52.69	33.54	31033.4
Class III B	JU2587	56.76	35.17	36754.2
Class III B	JU2587	51.6	32.74	28961.9
Class III B	JU2587	56.5	33.24	32691.2
Class III B	JU2587	51.35	33.55	30256.5
Class III B	JU2587	52.13	32.74	29255.1
Class II	JU1200	50.41	32.67	28179.5
Class II	JU1200	51.41	31.21	26214.2
Class II	JU1200	54.81	29.05	24217.2
Class II	JU1200	51.53	31.14	26167
Class II	JU1200	53.25	30.87	26566.8
Class II	JU1200	52.23	31.94	27894.7
Class II	JU1200	53.25	31.62	27887.3
Class II	JU1200	55.09	30.77	27320.7
Class II	JU1200	53.52	33.89	32189.8
Class II	JU1200	49.26	30.98	24746.5
Class II	JU1200	54.21	31.94	28962.7
Class II	JU1200	54.6	32.57	30329.8
Class II	JU1200	53.35	32.19	28951.1
Class II	JU1200	53.65	32.95	30501
Class II	JU1200	51.7	31.31	26535.7
Class II	JU1200	53.16	33.9	31988
Class II	JU1200	53.73	31.93	28689.2
Class II	JU1200	50.34	31.88	26789.1
Class II	JU1200	47.67	32.52	26396.1
Class II	JU1200	51.84	33.19	29894.9
Class II	JU1200	52.09	32.67	29115.9
Class II	JU1200	56.44	33.87	33899.2
Class II	JU1200	47.45	34.12	28923.7
Class II	JU1200	54.49	31.97	29166.4
Class II	JU1200	54.71	32.74	30715.4
Class II	JU1200	53.76	31.89	28628.5
Class II	JU1200	53.67	31.17	27312.2
Class II	JU1200	52.79	30.72	26085.2
Class II	JU1200	50.32	30.12	23893.2
Class II	JU1200	51.87	34.36	32071.4
Class II	JU1200	49.02	34.56	30661.9
Class II	JU1200	49.41	30.43	23962.9
Class II	JU1200	51.87	31.34	26668.6
Class II	JU1200	53.86	31.61	28171.4
Class II	JU1200	52.82	30.17	25163.7
Class II	JU1200	51.68	34.2	31648.2
Class II	JU1200	48.57	31.85	25801
Class II	JU1200	52	30.58	25455.5
Class II	JU1200	52.17	31.72	27479.3
Class II	JU1200	49.2	31.82	26077.2
Class II	JU1200	51.72	31.04	26096.3
Class II	JU1200	51.79	29.67	23876
Class II	JU1200	49.62	32.46	27380.8
Class II	JU1200	54.84	34.9	34980.7
Class II	JU1200	53.61	30.52	26141.5
Class II	JU1200	53.66	32.08	28915.7
Class II	JU1200	48.65	31.45	25194.6
Class II	JU1200	51.58	30.16	24565.7
Class II	JU1200	49.86	35.09	32151.1
Class II	JU1200	49.72	30.83	24737.9
Class II	QX1430	49.83	30.16	23727.3
Class II	QX1430	53.36	30.1	25320.2
Class II	QX1430	51.78	32.58	28775.7
Class II	QX1430	52.15	31.84	27682.5
Class II	QX1430	49.95	29.07	22099.5
Class II	QX1430	52.82	29.44	23976
Class II	QX1430	56.98	32.7	31907.2
Class II	QX1430	53.58	30.59	26250
Class II	QX1430	51.77	31.07	26161
Class II	QX1430	54.68	30.83	27215.6
Class II	QX1430	58.17	31.07	29398.6
Class II	QX1430	50.6	30.56	24744.3
Class II	QX1430	53.69	27.86	21824.7
Class II	QX1430	58.62	31.13	29751.1
Class II	QX1430	50.98	30.01	24044.4
Class II	QX1430	54.86	31.11	27798.4
Class II	QX1430	49.84	31.76	26328.5
Class II	QX1430	57.26	31.76	30245.2
Class II	QX1430	54.83	30.7	27053.2
Class II	QX1430	51.32	31.63	26886.9
Class II	QX1430	56.44	30.17	26901.6
Class II	QX1430	53.51	31.63	28033
Class II	QX1430	54.08	32.17	29301.2
Class II	QX1430	58.06	30.97	29157.1
Class II	QX1430	53.53	30.65	26334.1
Class II	QX1430	51.83	31.49	26913.6
Class II	QX1430	49.67	28.48	21101.3
Class II	QX1430	53.2	31.65	27898.8
Class II	QX1430	54.56	32.05	29339.5
Class II	QX1430	55.49	28.79	24082.1
Class II	QX1430	49.67	31.61	25982.8
Class II	QX1430	52.05	31.18	26492.3
Class II	QX1430	51.72	29.7	23885.2
Class II	QX1430	54.6	27.74	21994.8
Class II	QX1430	52.76	31.5	27410.7
Class II	QX1430	51.32	31.91	27365.6
Class II	QX1430	55.64	29.54	25417.7
Class II	QX1430	57.09	32.9	32343.6
Class II	QX1430	54.4	30.07	25749.7
Class II	QX1430	53.03	29.46	24100
Class II	QX1430	54.1	42.31	50702.7
Class II	QX1430	52.68	28.97	23149.6
Class II	QX1430	52.82	30.37	25511
Class II	QX1430	53.03	32.26	28891.1
Class II	QX1430	54.13	31.18	27557.3
Class II	QX1430	54.69	32.28	29830.1
Class II	QX1430	50.96	30.35	24577.8
Class II	QX1430	52.48	30.59	25721.9
Class II	QX1430	50.5	29.88	23609.5
Class II	QX1430	55.15	31.68	28984
Class II	CB4856	55.92	36.13	38213.3
Class II	CB4856	58.5	34.11	35632.6
Class II	CB4856	53.92	37.96	40693.4
Class II	CB4856	53.4	36.16	36553.9
Class II	CB4856	56.56	33.58	33393.6
Class II	CB4856	53.19	33.91	32024.5
Class II	CB4856	55.91	31.04	28208.4
Class II	CB4856	53.98	31.98	28903.5
Class II	CB4856	57.06	30.66	28089
Class II	CB4856	57.47	30.77	28491.4
Class II	CB4856	55.84	36.4	38740.3
Class II	CB4856	55.67	34	33704.7
Class II	CB4856	55.88	30.92	27975.9
Class II	CB4856	54.32	34.03	32934.6
Class II	CB4856	55.45	35.44	36457.8
Class II	CB4856	55.53	30.92	27799.8
Class II	CB4856	56.32	35.21	36558.4
Class II	CB4856	54.06	32.44	29781.6
Class II	CB4856	53.45	33.12	30699
Class II	CB4856	53.1	31.92	28328
Class II	CB4856	55.45	30.59	27178
Class II	CB4856	54.56	33.91	32854.5
Class II	CB4856	54.24	28	22271.9
Class II	CB4856	52.53	31.47	27234.9
Class II	CB4856	55.8	33.47	32718.9
Class II	CB4856	55.53	32.14	30027.8
Class II	CB4856	51.81	33.34	30158.7
Class II	CB4856	53.37	33.62	31579.3
Class II	CB4856	54.05	36.32	37331.2
Class II	CB4856	56.59	32.88	32033.4
Class II	CB4856	56.35	34.66	35448.5
Class II	CB4856	60.01	35.28	39101.9
Class II	CB4856	58.85	36.29	40587.3
Class II	CB4856	54.14	36.09	36911.7
Class II	CB4856	55.7	34.03	33767.4
Class II	CB4856	55.49	33.26	32131.4
Class II	CB4856	59.23	33.32	34425.5
Class II	CB4856	55.21	33.62	32669
Class II	CB4856	58.04	32.62	32330.2
Class II	CB4856	54.24	33.73	32306.2
Class II	CB4856	58.25	34.25	35785.8
Class II	CB4856	58.52	33.76	34919.7
Class II	CB4856	53.73	35.9	36248.2
Class II	CB4856	56.41	32.41	31029.4
Class II	CB4856	54.3	31.29	27829.4
Class II	CB4856	59.05	35.29	38500.6
Class II	CB4856	59.58	35.19	38639.2
Class II	CB4856	56.4	36.22	38742.8
Class II	CB4856	49.72	32.5	27494
Class II	CB4856	50.07	32.39	27496.2

## Sheet: Figure 3-supplement1C
Class	strains	length (µm)	width (µm)	volume (µm3)
Class I	JU3166	1023.99	60.8542	2.97829e+06
Class I	JU3166	994.501	61.446	2.94905e+06
Class I	JU3166	1029.53	62.1155	3.11982e+06
Class I	JU3166	1032.55	58.3664	2.76266e+06
Class I	JU3166	1019.48	55.3707	2.45487e+06
Class I	JU3166	1061.8	58.8424	2.88743e+06
Class I	JU3166	1019.07	59.4158	2.82551e+06
Class I	JU3166	1049.13	56.3464	2.61609e+06
Class I	JU3166	1041.61	61.4665	3.0908e+06
Class I	JU3166	1033.43	57.4245	2.67647e+06
Class I	JU3166	993.705	55.4086	2.39608e+06
Class I	JU3166	1005.89	54.3151	2.33068e+06
Class I	JU3166	1038	59.9952	2.93441e+06
Class I	JU3166	1048.96	62.823	3.25151e+06
Class I	JU3166	1140.96	62.2026	3.46718e+06
Class I	JU3166	1006.48	57.532	2.61646e+06
Class I	JU3166	1072.59	57.32	2.7678e+06
Class I	JU3166	1022.41	58.0715	2.70795e+06
Class I	JU3166	1090.14	62.2763	3.32062e+06
Class I	JU3166	991.711	56.9852	2.5293e+06
Class I	JU3166	1073.45	56.1345	2.65664e+06
Class I	JU3166	989.683	55.2335	2.37132e+06
Class I	JU3166	1032.61	59.3042	2.85231e+06
Class I	JU3166	1095.6	63.1865	3.4355e+06
Class I	JU3166	964.029	57.1583	2.47365e+06
Class I	JU3166	1080.43	58.61	2.91495e+06
Class I	JU3166	1028.28	58.0828	2.72457e+06
Class I	JU3166	1008.12	57.2463	2.59475e+06
Class I	JU3166	1010.12	53.7889	2.29535e+06
Class I	JU3166	1068.97	56.1345	2.64553e+06
Class III B	JU2593	1166.1	63.8796	3.73723e+06
Class III B	JU2593	1067.14	56.9422	2.71757e+06
Class III B	JU2593	1016.22	56.8061	2.57553e+06
Class III B	JU2593	1213.88	65.0508	4.03432e+06
Class III B	JU2593	1267.33	68.197	4.62924e+06
Class III B	JU2593	1060.32	59.6983	2.96792e+06
Class III B	JU2593	1063.63	58.568	2.86552e+06
Class III B	JU2593	1082.39	58.048	2.86449e+06
Class III B	JU2593	1158.99	58.1872	3.08195e+06
Class III B	JU2593	1082.11	61.2412	3.1875e+06
Class III B	JU2593	1095.5	63.6728	3.48826e+06
Class III B	JU2593	1081.29	65.5463	3.64863e+06
Class III B	JU2593	1101.57	63.1271	3.44774e+06
Class III B	JU2593	1070.37	59.3461	2.9608e+06
Class III B	JU2593	1079.16	61.0047	3.15429e+06
Class III B	JU2593	1073.53	57.2422	2.76272e+06
Class III B	JU2593	1099.9	57.6128	2.86735e+06
Class III B	JU2593	1112.09	60.6525	3.21312e+06
Class III B	JU2593	1121.27	65.6057	3.7904e+06
Class III B	JU2593	1127.13	64.3597	3.66685e+06
Class III B	JU2593	1103.16	64.1775	3.56856e+06
Class III B	JU2593	1243.87	66.2446	4.28711e+06
Class III B	JU2593	1142.38	62.7083	3.52818e+06
Class III B	JU2593	1200.92	61.0723	3.51796e+06
Class III B	JU2593	1120.08	62.4206	3.42765e+06
Class III B	JU2593	1015.8	57.0999	2.60116e+06
Class III B	JU2593	1134.32	58.994	3.10056e+06
Class III B	JU2593	1122.74	62.4524	3.43929e+06
Class III B	JU2593	1163.13	65.2576	3.89029e+06
Class III B	JU2593	1110.11	59.683	3.10567e+06
Class I	QG2873	1125.73	69.5402	4.27561e+06
Class I	QG2873	1122.03	62.9274	3.48959e+06
Class I	QG2873	1057.07	66.6039	3.68293e+06
Class I	QG2873	1250.65	66.7165	4.37213e+06
Class I	QG2873	1091.1	66.8537	3.83005e+06
Class I	QG2873	1188.26	70.3777	4.62243e+06
Class I	QG2873	1077.73	68.4929	3.97092e+06
Class I	QG2873	1055.01	63.0892	3.29805e+06
Class I	QG2873	1133.63	63.6584	3.60807e+06
Class I	QG2873	1152.65	68.3741	4.23224e+06
Class I	QG2873	1042.22	63.7178	3.32331e+06
Class I	QG2873	1164.23	68.8901	4.33953e+06
Class I	QG2873	981.18	58.6039	2.64662e+06
Class I	QG2873	1139.43	65.9559	3.893e+06
Class I	QG2873	1161.54	69.4921	4.40551e+06
Class I	QG2873	1154.75	63.3707	3.64214e+06
Class I	QG2873	1043.02	61.316	3.07985e+06
Class I	QG2873	1100.26	61.145	3.23076e+06
Class I	QG2873	1145.03	62.6602	3.53093e+06
Class I	QG2873	1133.02	62.8844	3.51896e+06
Class I	QG2873	1131.95	64.0536	3.64758e+06
Class I	QG2873	1042.13	63.8478	3.33659e+06
Class I	QG2873	1082.95	63.4762	3.42705e+06
Class I	QG2873	1101.44	64.842	3.63716e+06
Class I	QG2873	1127.55	65.0365	3.74576e+06
Class I	QG2873	1137.37	65.1081	3.78671e+06
Class I	QG2873	1095.46	65.4173	3.68189e+06
Class I	QG2873	1117.28	65.5811	3.77406e+06
Class I	QG2873	1025.03	65.7798	3.48346e+06
Class I	QG2873	1140.08	66.6469	3.97726e+06
Class II	N2	1186.28	66.2896	4.09421e+06
Class II	N2	1136.89	63.511	3.60169e+06
Class II	N2	1114.22	67.165	3.94772e+06
Class II	N2	1115.62	61.1532	3.27675e+06
Class II	N2	1157.61	70.777	4.55445e+06
Class II	N2	1149.64	64.713	3.78125e+06
Class II	N2	1193.81	66.5476	4.15232e+06
Class II	N2	1174.62	64.3515	3.82037e+06
Class II	N2	1136.86	63.4987	3.60019e+06
Class II	N2	1124.58	65.3016	3.76641e+06
Class II	N2	1103.2	62.4104	3.37488e+06
Class II	N2	1093.39	64.0946	3.52782e+06
Class II	N2	1121.24	63.5847	3.56035e+06
Class II	N2	1148.93	65.5402	3.87615e+06
Class II	N2	1066.77	61.5586	3.17495e+06
Class II	N2	1126.8	63.5571	3.57492e+06
Class II	N2	1194.79	66.1514	4.10638e+06
Class II	N2	1091.95	61.1931	3.21141e+06
Class II	N2	1098.48	63.3421	3.46151e+06
Class II	N2	1011.75	58.3305	2.70369e+06
Class II	N2	1074.45	62.7216	3.31981e+06
Class II	N2	1147.56	62.352	3.50404e+06
Class II	N2	1101.21	60.7436	3.19127e+06
Class II	N2	1144.27	60.0055	3.23593e+06
Class II	N2	1108.86	60.7109	3.20995e+06
Class II	N2	1149.33	64.6546	3.77342e+06
Class II	N2	1079.92	61.1992	3.17667e+06
Class II	N2	1177.82	64.2789	3.82212e+06
Class II	N2	1175.3	64.5	3.84022e+06
Class II	N2	1107.87	65.0846	3.68583e+06
Class III A	JU2829	1138.18	67.34	4.05367e+06
Class III A	JU2829	1074.94	64.3915	3.5005e+06
Class III A	JU2829	1106.21	65.3477	3.71013e+06
Class III A	JU2829	1068.88	60.4662	3.06935e+06
Class III A	JU2829	1126.18	63.3789	3.55295e+06
Class III A	JU2829	1031.94	58.5895	2.78218e+06
Class III A	JU2829	1044.67	58.3684	2.79529e+06
Class III A	JU2829	1117.27	64.756	3.67965e+06
Class III A	JU2829	1051.08	59.0073	2.87434e+06
Class III A	JU2829	1063.11	67.0626	3.75517e+06
Class III A	JU2829	1009.96	62.0756	3.05657e+06
Class III A	JU2829	1099.99	63.854	3.52254e+06
Class III A	JU2829	1029.81	62.1923	3.12839e+06
Class III A	JU2829	1148.63	59.7649	3.22228e+06
Class III A	JU2829	1119.61	58.2701	2.98573e+06
Class III A	JU2829	1125.02	66.2026	3.87259e+06
Class III A	JU2829	1127.9	63.1721	3.53519e+06
Class III A	JU2829	1144.79	64.3679	3.72524e+06
Class III A	JU2829	1105.6	59.987	3.12466e+06
Class III A	JU2829	1027.96	59.1066	2.82057e+06
Class III A	JU2829	1116.16	63.3574	3.51892e+06
Class III A	JU2829	1118.64	67.2858	3.97764e+06
Class III A	JU2829	1092.5	61.8412	3.28146e+06
Class III A	JU2829	1120	67.3544	3.9906e+06
Class III A	JU2829	1093.23	66.1412	3.75615e+06
Class III A	JU2829	1087.5	65.6835	3.68496e+06
Class III A	JU2829	1070.49	62.6643	3.30152e+06
Class III A	JU2829	1087.22	62.0336	3.28595e+06
Class III A	JU2829	1070.72	66.4104	3.70883e+06
Class III A	JU2829	1139.3	67.0718	4.02539e+06
Class III A	JU440	1012.45	58.8516	2.7541e+06
Class III A	JU440	1041.78	59.4895	2.89564e+06
Class III A	JU440	959.63	63.255	3.01567e+06
Class III A	JU440	1055.33	59.4014	2.92464e+06
Class III A	JU440	1004.77	61.4624	2.9811e+06
Class III A	JU440	1080.91	60.6689	3.12472e+06
Class III A	JU440	1149.06	68.9198	4.28667e+06
Class III A	JU440	1097.21	63.681	3.4946e+06
Class III A	JU440	1035.42	62.8015	3.20735e+06
Class III A	JU440	1085.38	63.169	3.40158e+06
Class III A	JU440	1037.56	61.9415	3.12655e+06
Class III A	JU440	1093.62	65.6559	3.70257e+06
Class III A	JU440	962.073	57.2074	2.47288e+06
Class III A	JU440	1063.25	62.2568	3.23666e+06
Class III A	JU440	1117.28	62.9837	3.48105e+06
Class III A	JU440	1056.98	66.1862	3.63658e+06
Class III A	JU440	1008.38	62.8179	3.12522e+06
Class III A	JU440	1054.11	60.5624	3.03655e+06
Class III A	JU440	1005.84	57.8094	2.64007e+06
Class III A	JU440	1028.88	61.3907	3.04551e+06
Class III A	JU440	957.943	59.7311	2.6843e+06
Class III A	JU440	1010.12	63.3533	3.18422e+06
Class III A	JU440	1051.04	59.1557	2.88869e+06
Class III A	JU440	1075.23	63.898	3.44799e+06
Class III A	JU440	1022.02	59.2202	2.81507e+06
Class III A	JU440	1001.52	63.4762	3.16934e+06
Class III A	JU440	1014.44	64.4519	3.30969e+06
Class III A	JU440	1071.91	63.6431	3.40998e+06
Class III A	JU440	1051.9	63.7751	3.3602e+06
Class III A	JU440	1074.19	60.3771	3.07549e+06
Class II	JU1200	1187.43	70.6725	4.65799e+06
Class II	JU1200	1087	64.7519	3.5795e+06
Class II	JU1200	1045.36	63.1885	3.27818e+06
Class II	JU1200	1097.51	58.8424	2.98454e+06
Class II	JU1200	1131.11	66.4452	3.92213e+06
Class II	JU1200	1270.1	67.4179	4.53396e+06
Class II	JU1200	1078.43	62.9868	3.36033e+06
Class II	JU1200	1050.63	53.8104	2.38932e+06
Class II	JU1200	1075.14	56.8306	2.72721e+06
Class II	JU1200	1116.86	63.3789	3.52354e+06
Class II	JU1200	1077.08	60.1959	3.06528e+06
Class II	JU1200	1115.2	56.1785	2.76429e+06
Class II	JU1200	1049.04	57.3333	2.70828e+06
Class II	JU1200	1065.9	58.996	2.91375e+06
Class II	JU1200	1116.74	62.3469	3.40935e+06
Class II	JU1200	1146.79	62.9868	3.57332e+06
Class II	JU1200	1072.66	57.7797	2.81255e+06
Class II	JU1200	1068.37	56.0249	2.63375e+06
Class II	JU1200	1069.02	59.6277	2.98519e+06
Class II	JU1200	1041.38	59.9164	2.93624e+06
Class II	JU1200	1035.19	56.3955	2.58584e+06
Class II	JU1200	1028.52	55.8887	2.52321e+06
Class II	JU1200	1076.8	61.9046	3.24094e+06
Class II	JU1200	1144.39	65.8187	3.89369e+06
Class II	JU1200	1073.81	64.4427	3.50237e+06
Class II	JU1200	1132.86	60.9679	3.30725e+06
Class II	JU1200	1055.3	62.4862	3.2362e+06
Class II	JU1200	1099.68	63.6758	3.50192e+06
Class II	JU1200	1063.3	63.6492	3.38323e+06
Class III B	NIC1832	1081.84	54.5721	2.53042e+06
Class III B	NIC1832	1044.13	53.6067	2.35658e+06
Class III B	NIC1832	1044.13	59.1608	2.8702e+06
Class III B	NIC1832	1141.67	57.6057	2.97552e+06
Class III B	NIC1832	1154.37	56.6167	2.9062e+06
Class III B	NIC1832	1138.35	57.1787	2.92305e+06
Class III B	NIC1832	1102	62.3572	3.36547e+06
Class III B	NIC1832	1209.16	62.1309	3.66598e+06
Class III B	NIC1832	1150.25	60.5757	3.31496e+06
Class III B	NIC1832	1162.22	60.6515	3.35786e+06
Class III B	NIC1832	1033.34	57.2934	2.66405e+06
Class III B	NIC1832	1155.63	60.8184	3.35722e+06
Class III B	NIC1832	1114.24	62.135	3.37863e+06
Class III B	NIC1832	1029.87	59.0513	2.82054e+06
Class III B	NIC1832	1037.89	57.8729	2.73019e+06
Class III B	NIC1832	1126.4	58.0367	2.97981e+06
Class III B	NIC1832	1104.29	55.6553	2.68649e+06
Class III B	NIC1832	1131.38	57.6169	2.94983e+06
Class III B	NIC1832	1203.54	58.6162	3.24776e+06
Class III B	NIC1832	1113.48	57.6241	2.9039e+06
Class III B	NIC1832	1124.43	58.1503	2.98626e+06
Class III B	NIC1832	1145.1	54.1401	2.63616e+06
Class III B	NIC1832	1166.83	59.554	3.25027e+06
Class III B	NIC1832	1085.42	60.4109	3.11112e+06
Class III B	NIC1832	1145.14	53.3835	2.56308e+06
Class III B	NIC1832	1180.77	55.9399	2.90202e+06
Class III B	NIC1832	1105.37	59.5611	3.0798e+06
Class III B	NIC1832	1149.99	62.9274	3.57654e+06
Class III B	NIC1832	1134.33	58.9059	3.09134e+06
Class III B	NIC1832	1057.05	56.4006	2.6409e+06
Class III A	ED3005	1064.56	62.61	3.27755e+06
Class III A	ED3005	1097.51	61.2433	3.23308e+06
Class III A	ED3005	1066.06	62.3254	3.25239e+06
Class III A	ED3005	1057.63	63.1086	3.30829e+06
Class III A	ED3005	1062.11	65.6078	3.59064e+06
Class III A	ED3005	1130.22	64.7631	3.72312e+06
Class III A	ED3005	1099.34	64.5225	3.59455e+06
Class III A	ED3005	977.159	53.5043	2.19701e+06
Class III A	ED3005	1092.98	65.7235	3.70802e+06
Class III A	ED3005	1030.53	64.9423	3.41356e+06
Class III A	ED3005	1073.85	59.6021	2.99609e+06
Class III A	ED3005	1064.25	62.9981	3.31732e+06
Class III A	ED3005	1101.28	66.8722	3.86791e+06
Class III A	ED3005	1104.63	62.9981	3.44318e+06
Class III A	ED3005	1106.55	69.1235	4.15253e+06
Class III A	ED3005	1021.42	62.6786	3.15162e+06
Class III A	ED3005	1030.28	64.2123	3.33643e+06
Class III A	ED3005	1049.33	65.015	3.48361e+06
Class III A	ED3005	1063.62	65.7818	3.61484e+06
Class III A	ED3005	1070.36	67.6318	3.84522e+06
Class III A	ED3005	1053.3	65.5402	3.55351e+06
Class III A	ED3005	1017.69	66.263	3.50953e+06
Class III A	ED3005	1043.25	63.3451	3.2878e+06
Class III A	ED3005	1119.08	65.7009	3.79397e+06
Class III A	ED3005	1018.62	62.0848	3.08372e+06
Class III A	ED3005	1066.44	67.0831	3.76923e+06
Class III A	ED3005	1184.61	68.2738	4.33684e+06
Class III A	ED3005	1076.42	63.7403	3.4348e+06
Class III A	ED3005	1028.88	64.9802	3.41207e+06
Class III A	ED3005	1087.64	64.2686	3.52837e+06
Class III B	JU751	1134.59	55.2949	2.72457e+06
Class III B	JU751	1124.16	59.943	3.17247e+06
Class III B	JU751	1208.8	59.3195	3.34072e+06
Class III B	JU751	1156.47	54.0295	2.65147e+06
Class III B	JU751	1102.87	55.7014	2.68747e+06
Class III B	JU751	1095.5	55.8703	2.68574e+06
Class III B	JU751	1137.89	63.7229	3.62896e+06
Class III B	JU751	1081.87	59.6441	3.02273e+06
Class III B	JU751	1093.21	62.5384	3.35804e+06
Class III B	JU751	1079.65	56.6883	2.72496e+06
Class III B	JU751	1141.01	60.1375	3.24093e+06
Class III B	JU751	1082.86	56.7989	2.74375e+06
Class III B	JU751	1129.83	60.0915	3.20426e+06
Class III B	JU751	1132.71	62.5548	3.48119e+06
Class III B	JU751	1199.87	59.0001	3.28043e+06
Class III B	JU751	1156.11	58.6356	3.12186e+06
Class III B	JU751	1106.14	61.1225	3.24564e+06
Class III B	JU751	1129.08	57.0702	2.88823e+06
Class III B	JU751	1123.31	59.5222	3.1257e+06
Class III B	JU751	1180.23	63.682	3.75914e+06
Class III B	JU751	1149.61	58.7288	3.11416e+06
Class III B	JU751	1148.11	59.2489	3.16543e+06
Class III B	JU751	1181.76	60.3444	3.37981e+06
Class III B	JU751	1175.14	57.8452	3.08826e+06
Class III B	JU751	1131.96	61.7879	3.39412e+06
Class III B	JU751	1137.8	56.6371	2.86654e+06
Class III B	JU751	1140.07	57.1961	2.92923e+06
Class III B	JU751	1122.23	57.7797	2.94255e+06
Class III B	JU751	1134.55	60.543	3.26618e+06
Class III B	JU751	1148.69	60.4396	3.2956e+06
Class II	QX1430	1029.92	59.8304	2.89559e+06
Class II	QX1430	993.266	57.0651	2.54037e+06
Class II	QX1430	1046.45	59.1813	2.87856e+06
Class II	QX1430	990.659	58.5773	2.66976e+06
Class II	QX1430	987.87	56.8716	2.50946e+06
Class II	QX1430	984.536	63.3073	3.09905e+06
Class II	QX1430	1067.03	63.9942	3.43202e+06
Class II	QX1430	958.745	58.9213	2.61419e+06
Class II	QX1430	1009.68	60.7825	2.92976e+06
Class II	QX1430	1078.93	64.412	3.51572e+06
Class II	QX1430	988.417	57.3753	2.55553e+06
Class II	QX1430	972.555	60.112	2.7601e+06
Class II	QX1430	959.923	59.0912	2.63252e+06
Class II	QX1430	1042.05	59.4936	2.8968e+06
Class II	QX1430	1022.27	59.854	2.87633e+06
Class II	QX1430	1014.38	58.1749	2.69627e+06
Class II	QX1430	996.034	60.413	2.85512e+06
Class II	QX1430	1069.79	57.3057	2.7592e+06
Class II	QX1430	994.271	53.75	2.25606e+06
Class II	QX1430	1084.2	59.0912	2.97334e+06
Class II	QX1430	1019.96	54.7165	2.39833e+06
Class II	QX1430	1045.53	57.1972	2.68644e+06
Class II	QX1430	920.362	53.021	2.0321e+06
Class II	QX1430	986.658	56.8931	2.50828e+06
Class II	QX1430	995.357	56.4856	2.49428e+06
Class II	QX1430	942.223	58.353	2.51983e+06
Class II	QX1430	1008.12	57.0262	2.57484e+06
Class II	QX1430	1039.85	57.9558	2.74319e+06
Class II	QX1430	963.999	58.4401	2.58576e+06
Class III A	JU830	1121.56	60.0915	3.18081e+06
Class III A	JU830	1133.99	59.4608	3.14892e+06
Class III A	JU830	1232.73	62.6449	3.79952e+06
Class III A	JU830	1057.65	59.0707	2.89851e+06
Class III A	JU830	1099.06	61.4286	3.25727e+06
Class III A	JU830	1097.41	59.6359	3.0653e+06
Class III A	JU830	1057.18	60.9085	3.08031e+06
Class III A	JU830	1028.24	56.7917	2.60469e+06
Class III A	JU830	1109.08	59.9164	3.12712e+06
Class III A	JU830	1022.11	57.5637	2.66003e+06
Class III A	JU830	1101.19	59.5663	3.0687e+06
Class III A	JU830	1118.94	58.9376	3.05269e+06
Class III A	JU830	1094.59	58.7513	2.9674e+06
Class III A	JU830	1080.06	59.5222	3.00535e+06
Class III A	JU830	1097.19	59.1772	3.01773e+06
Class III A	JU830	1106.36	60.632	3.1944e+06
Class III A	JU830	1077.78	58.8578	2.93244e+06
Class III A	JU830	1091.79	59.6451	3.05057e+06
Class III A	JU830	1136.88	60.8972	3.31131e+06
Class III A	JU830	1082.59	59.6011	3.02037e+06
Class III A	JU830	1065.72	59.6983	2.98302e+06
Class III A	JU830	1102.87	53.5248	2.48154e+06
Class III A	JU830	1108.98	58.6346	2.99449e+06
Class III A	JU830	1103.81	52.7733	2.41441e+06
Class III A	JU830	1112.85	57.233	2.86298e+06
Class III A	JU830	1085.09	56.3208	2.70329e+06
Class III A	JU830	1058.04	55.4935	2.55904e+06
Class III A	JU830	1059.04	60.1959	3.01394e+06
Class III A	JU830	1088.38	59.6359	3.04009e+06
Class III A	JU830	1077.29	56.6801	2.71821e+06
Class II	CB4856	1074.49	58.3776	2.87596e+06
Class II	CB4856	1117.28	61.36	3.30387e+06
Class II	CB4856	1050.4	56.8655	2.66773e+06
Class II	CB4856	1053.19	59.4803	2.92647e+06
Class II	CB4856	1006.38	58.7513	2.72827e+06
Class II	CB4856	1047.05	59.08	2.87038e+06
Class II	CB4856	1019.7	51.7126	2.14168e+06
Class II	CB4856	966.866	57.3702	2.49936e+06
Class II	CB4856	1034.3	56.1345	2.55974e+06
Class II	CB4856	913.723	54.0315	2.09507e+06
Class II	CB4856	1059.2	57.9558	2.79424e+06
Class II	CB4856	1029.28	58.1053	2.72931e+06
Class II	CB4856	1060.22	59.9471	2.99241e+06
Class II	CB4856	1073.15	54.8762	2.53815e+06
Class II	CB4856	1017.85	50.6816	2.05341e+06
Class II	CB4856	990.034	55.7229	2.41439e+06
Class II	CB4856	1027.7	57.9558	2.71113e+06
Class II	CB4856	1029.55	54.697	2.41915e+06
Class II	CB4856	1022.56	52.892	2.24678e+06
Class II	CB4856	1023.84	55.2693	2.45636e+06
Class II	CB4856	1056.09	53.5575	2.37919e+06
Class II	CB4856	1047.53	58.4288	2.80874e+06
Class II	CB4856	1005.18	53.9445	2.29735e+06
Class II	CB4856	1010.49	54.3827	2.34717e+06
Class II	CB4856	1036.24	51.7382	2.17857e+06
Class II	CB4856	1035.32	55.126	2.47102e+06
Class II	CB4856	1050.65	53.7285	2.3821e+06
Class II	CB4856	1074.15	54.9458	2.54697e+06
Class II	CB4856	1009.98	51.4157	2.09698e+06
Class II	CB4856	1066.01	55.7485	2.60207e+06
Class III A	NIC1786	955.307	57.3354	2.46648e+06
Class III A	NIC1786	853.476	50.999	1.74343e+06
Class III A	NIC1786	1069.94	52.9719	2.35798e+06
Class III A	NIC1786	1070.91	54.7943	2.52529e+06
Class III A	NIC1786	1029.82	57.9558	2.71672e+06
Class III A	NIC1786	989.81	59.0912	2.71449e+06
Class III A	NIC1786	941.207	54.5537	2.2e+06
Class III A	NIC1786	987.039	60.4416	2.83202e+06
Class III A	NIC1786	980.326	49.792	1.90888e+06
Class III A	NIC1786	991.969	60.9249	2.89186e+06
Class III A	NIC1786	1013.43	56.7641	2.56467e+06
Class III A	NIC1786	1015	53.6128	2.29135e+06
Class III A	NIC1786	980.063	54.6847	2.30185e+06
Class III A	NIC1786	1034	54.5025	2.41237e+06
Class III A	NIC1786	1026.14	60.4396	2.94401e+06
Class III A	NIC1786	995.863	58.2609	2.65487e+06
Class III A	NIC1786	1004.04	58.2722	2.6777e+06
Class III A	NIC1786	1038.24	57.6784	2.71277e+06
Class III A	NIC1786	980.999	57.8452	2.57806e+06
Class III A	NIC1786	933.009	56.4692	2.33668e+06
Class III A	NIC1786	967.158	52.6545	2.106e+06
Class III A	NIC1786	995.969	56.4692	2.49436e+06
Class III A	NIC1786	1012.23	55.4178	2.44156e+06
Class III A	NIC1786	943.794	56.7201	2.38474e+06
Class III A	NIC1786	977.769	54.7185	2.2993e+06
Class III A	NIC1786	1005.69	54.6039	2.35505e+06
Class III A	NIC1786	1046.42	58.6448	2.82655e+06
Class III A	NIC1786	987.885	60.716	2.86024e+06
Class III A	NIC1786	952.829	45.3486	1.53898e+06
Class III A	NIC1786	1063.65	58.5762	2.86637e+06
Class III B	JU2587	1061.73	55.039	2.52607e+06
Class III B	JU2587	1107.41	57.8452	2.91026e+06
Class III B	JU2587	1111.05	64.154	3.59147e+06
Class III B	JU2587	1127.2	66.5486	3.92076e+06
Class III B	JU2587	1111.88	61.8401	3.33955e+06
Class III B	JU2587	1030.85	59.4895	2.86528e+06
Class III B	JU2587	1025.39	58.7441	2.77912e+06
Class III B	JU2587	1150.88	61.1829	3.3836e+06
Class III B	JU2587	1128.46	59.6	3.14824e+06
Class III B	JU2587	1003.94	57.5186	2.60865e+06
Class III B	JU2587	1084.19	58.9755	2.96168e+06
Class III B	JU2587	1106.05	61.2658	3.26064e+06
Class III B	JU2587	1105.39	53.2524	2.46198e+06
Class III B	JU2587	998.682	52.3924	2.15305e+06
Class III B	JU2587	1004.81	58.6336	2.7131e+06
Class III B	JU2587	1106.64	56.1181	2.73716e+06
Class III B	JU2587	1137.28	56.5624	2.85768e+06
Class III B	JU2587	1080.51	56.2	2.68034e+06
Class III B	JU2587	1114.82	59.983	3.15028e+06
Class III B	JU2587	1038.21	56.7221	2.62349e+06
Class III B	JU2587	1069.01	60.1375	3.03643e+06
Class III B	JU2587	1032.88	56.1283	2.55567e+06
Class III B	JU2587	1097.35	61.4644	3.25598e+06
Class III B	JU2587	1086.11	61.6036	3.23725e+06
Class III B	JU2587	1100.34	60.7099	3.1852e+06
Class III B	JU2587	1042.86	56.028	2.57115e+06
Class III B	JU2587	1106.96	60.3833	3.16995e+06
Class III B	JU2587	1191.2	59.6205	3.32556e+06
Class III B	JU2587	1134.67	54.6929	2.66576e+06
Class III B	JU2587	1164.25	58.2763	3.10542e+06
Class II	N2	NA	NA	NA
Class II	N2	1242.75	66.1627	3.98146e+06
Class II	N2	1163.47	65.358	3.63735e+06
Class II	N2	1170	66.6735	3.8065e+06
Class II	N2	1180.83	61.0426	3.22021e+06
Class II	N2	1227.78	65.1716	3.81655e+06
Class II	N2	NA	NA	NA
Class II	N2	1233.47	63.898	3.68584e+06
Class II	N2	1207.82	64.1458	3.63722e+06
Class II	N2	1100.24	66.5271	3.56384e+06
Class II	N2	1179.32	73.1215	4.6148e+06
Class II	N2	NA	NA	NA
Class II	N2	1246.98	67.4936	4.15735e+06
Class II	N2	1085.9	63.5909	3.21374e+06
Class II	N2	1188.41	63.4291	3.49927e+06
Class II	N2	1222.02	66.1688	3.91578e+06
Class II	N2	1230.52	62.4647	3.51392e+06
Class II	N2	1209.27	69.274	4.24713e+06
Class II	N2	1200.12	65.2535	3.73995e+06
Class II	N2	1102.72	67.9502	3.7263e+06
Class II	JU1200	1029.9	63.0851	2.99972e+06
Class II	JU1200	NA	NA	NA
Class II	JU1200	1131.27	66.2415	3.63295e+06
Class II	JU1200	1123.29	65.3109	3.50668e+06
Class II	JU1200	1071.42	68.1263	3.63932e+06
Class II	JU1200	1039.45	67.4414	3.4601e+06
Class II	JU1200	1098.59	65.4061	3.43956e+06
Class II	JU1200	1071.72	60.8798	2.90711e+06
Class II	JU1200	1114.7	59.382	2.87673e+06
Class II	JU1200	1034.17	70.3152	3.74218e+06
Class I	QG2873	1115.87	61.535	3.09238e+06
Class I	QG2873	1061.17	59.6912	2.76719e+06
Class I	QG2873	1081.92	57.2535	2.59556e+06
Class I	QG2873	1068.26	62.782	3.08164e+06
Class I	QG2873	1042.59	66.3306	3.35718e+06
Class I	QG2873	1065.54	58.1063	2.633e+06
Class I	QG2873	1085.42	59.7608	2.83703e+06
Class I	QG2873	1049.7	62.0746	2.96022e+06
Class I	QG2873	1076.59	60.6597	2.89923e+06
Class I	QG2873	1103.94	59.7342	2.88286e+06
Class I	QG2873	1100.62	61.6036	3.05691e+06
Class I	QG2873	1008.17	57.9875	2.48104e+06
Class I	QG2873	1004.43	59.3216	2.58688e+06
Class I	QG2873	NA	NA	NA
Class I	QG2873	1147.02	60.0874	3.03089e+06
Class I	QG2873	1158.71	60.1027	3.06335e+06
Class I	QG2873	1002.16	62.7534	2.88831e+06
Class I	QG2873	1074.9	62.0971	3.0335e+06
Class I	QG2873	1069.17	58.2896	2.65864e+06
Class I	QG2873	NA	NA	NA
Class II	QX1430	1034.36	63.7362	3.07523e+06
Class II	QX1430	1044.87	60.6925	2.81686e+06
Class II	QX1430	1058.35	59.3195	2.72557e+06
Class II	QX1430	1033.9	61.9599	2.90491e+06
Class II	QX1430	1093.2	61.9169	3.06726e+06
Class II	QX1430	962.388	59.4731	2.49129e+06
Class II	QX1430	1056.41	58.3664	2.63385e+06
Class II	QX1430	1098.4	62.9796	3.18855e+06
Class II	QX1430	1054.17	48.0156	1.77872e+06
Class II	QX1430	1193.75	66.7944	3.89784e+06
Class II	QX1430	1061.95	61.8924	2.97722e+06
Class II	QX1430	1041.64	58.7114	2.62781e+06
Class II	QX1430	1085.63	62.007	3.0549e+06
Class II	QX1430	1075.18	59.7802	2.8121e+06
Class II	QX1430	NA	NA	NA
Class II	QX1430	1050.19	57.8452	2.57178e+06
Class II	QX1430	1061.11	62.4196	3.02575e+06
Class II	QX1430	1067.16	68.628	3.67843e+06
Class II	QX1430	1062.5	57.493	2.57035e+06
Class II	QX1430	1015.89	63.3554	2.98433e+06
Class II	CB4856	1054.17	62.1432	2.9794e+06
Class II	CB4856	1092.05	61.9661	3.06891e+06
Class II	CB4856	1042.91	62.047	2.93846e+06
Class II	CB4856	1076.14	61.66	2.99439e+06
Class II	CB4856	1000.03	61.0027	2.72361e+06
Class II	CB4856	987.598	61.8985	2.76932e+06
Class II	CB4856	1014.2	60.4058	2.70839e+06
Class II	CB4856	NA	NA	NA
Class II	CB4856	1060.4	56.7313	2.49774e+06
Class II	CB4856	1099.09	61.7193	3.06413e+06
Class II	CB4856	958.678	57.9087	2.35284e+06
Class II	CB4856	1091.31	65.4716	3.42362e+06
Class II	CB4856	1092.63	59.8427	2.86371e+06
Class II	CB4856	1024.91	60.7805	2.77106e+06
Class II	CB4856	1064.67	62.351	3.02926e+06
Class II	CB4856	1069.07	56.4825	2.49612e+06
Class II	CB4856	1103.12	60.675	2.97219e+06
Class II	CB4856	930.362	52.1467	1.85156e+06
Class II	CB4856	1085.67	62.5793	3.11167e+06
Class II	CB4856	1044.94	57.9527	2.56846e+06
Class III A	ED3005	1235.18	73.6897	4.90881e+06
Class III A	ED3005	1093.9	67.9267	3.69395e+06
Class III A	ED3005	1123.73	63.2151	3.28652e+06
Class III A	ED3005	NA	NA	NA
Class III A	ED3005	1199.75	70.5405	4.36918e+06
Class III A	ED3005	1150.05	59.5007	2.97985e+06
Class III A	ED3005	1061.4	61.8156	2.9683e+06
Class III A	ED3005	991.331	56.8419	2.34417e+06
Class III A	ED3005	1147.39	65.9262	3.64972e+06
Class III A	ED3005	1128.4	71.3902	4.20896e+06
Class III A	ED3005	1073.3	65.9385	3.41531e+06
Class III A	ED3005	1135.81	65.8443	3.60392e+06
Class III A	ED3005	1116.46	67.8816	3.76514e+06
Class III A	ED3005	1088.86	69.6508	3.86595e+06
Class III A	ED3005	1188.99	66.2599	3.82044e+06
Class III A	ED3005	1109.81	68.759	3.84008e+06
Class III A	ED3005	1089.95	69.6487	3.86961e+06
Class III A	ED3005	1003.66	65.1972	3.12233e+06
Class III A	ED3005	1236.34	77.9324	5.49549e+06
Class III A	ED3005	1156.83	71.335	4.30831e+06
Class III A	JU830	NA	NA	NA
Class III A	JU830	NA	NA	NA
Class III A	JU830	1058.87	67.8458	3.56714e+06
Class III A	JU830	1137.45	70.346	4.1195e+06
Class III A	JU830	1044.24	68.5277	3.58892e+06
Class III A	JU830	1180.79	77.1789	5.14757e+06
Class III A	JU830	1159.59	70.3541	4.20063e+06
Class III A	JU830	1136.2	74.391	4.60179e+06
Class III A	JU830	1171.05	72.9577	4.56196e+06
Class III A	JU830	1121.77	71.3544	4.18002e+06
Class III A	JU830	1151.2	76.0353	4.87094e+06
Class III A	JU830	1145.03	68.3782	3.91818e+06
Class III A	JU830	NA	NA	NA
Class III A	JU830	1131.89	75.5664	4.73037e+06
Class III A	JU830	1160.71	78.2016	5.19504e+06
Class III A	JU830	1186.83	72.7202	4.59335e+06
Class III A	JU830	1147.66	74.5344	4.66615e+06
Class III A	JU830	1239.35	75.3196	5.14567e+06
Class III A	JU830	1116.57	69.0242	3.89334e+06
Class III A	JU830	1185.19	68.8512	4.11189e+06
Class III A	NIC1786	NA	NA	NA
Class III A	NIC1786	1096.97	68.0199	3.7145e+06
Class III A	NIC1786	1096.8	70.6971	4.01203e+06
Class III A	NIC1786	1108.59	65.5422	3.48533e+06
Class III A	NIC1786	1085.54	69.5986	3.84837e+06
Class III A	NIC1786	1050.73	65.4214	3.29129e+06
Class III A	NIC1786	961.347	55.3338	2.15424e+06
Class III A	NIC1786	1055.97	68.7222	3.64988e+06
Class III A	NIC1786	1034.11	69.1245	3.61629e+06
Class III A	NIC1786	NA	NA	NA
Class III A	NIC1786	927.321	57.5135	2.24493e+06
Class III A	NIC1786	1053.81	67.9502	3.56103e+06
Class III A	NIC1786	1008.25	65.5402	3.16969e+06
Class III A	NIC1786	1132.98	64.2144	3.41915e+06
Class III A	NIC1786	1024.83	68.2441	3.49313e+06
Class III A	NIC1786	NA	NA	NA
Class III A	NIC1786	1069.39	65.4716	3.35485e+06
Class III A	NIC1786	907.516	58.9305	2.30657e+06
Class III A	NIC1786	997.693	65.1215	3.09655e+06
Class III A	NIC1786	978.098	67.1547	3.22826e+06
Class III B	JU2587	1399.2	76.8287	6.04449e+06
Class III B	JU2587	1256	59.17	3.21828e+06
Class III B	JU2587	1210.72	65.401	3.79003e+06
Class III B	JU2587	1240.84	68.2717	4.23282e+06
Class III B	JU2587	1287.33	71.7291	4.84743e+06
Class III B	JU2587	1257.31	70.4831	4.57138e+06
Class III B	JU2587	1235.69	80.7264	5.8935e+06
Class III B	JU2587	1203.3	69.1205	4.20746e+06
Class III B	JU2587	1286	78.7637	5.83882e+06
Class III B	JU2587	1189.32	74.5528	4.83792e+06
Class III B	JU2587	1240.9	67.1558	4.09577e+06
Class III B	JU2587	1192.56	71.6687	4.48304e+06
Class III B	JU2587	1288.89	71.9185	4.87899e+06
Class III B	JU2587	1270.32	71.8694	4.80212e+06
Class III B	JU2587	1146.21	71.7895	4.32332e+06
Class III B	JU2587	1239.16	75.7445	5.20309e+06
Class III B	JU2587	1275.76	74.2723	5.15056e+06
Class III B	JU2587	1269.68	74.9746	5.22342e+06
Class III B	JU2587	1165.51	68.4929	4.00165e+06
Class III B	JU2587	1126.5	64.9249	3.47524e+06
Class III B	NIC1832	1158.11	65.7828	3.66782e+06
Class III B	NIC1832	1275.78	67.466	4.24988e+06
Class III B	NIC1832	1303.52	66.7309	4.2482e+06
Class III B	NIC1832	1308.04	69.6385	4.6425e+06
Class III B	NIC1832	1085.6	63.2714	3.18066e+06
Class III B	NIC1832	1226.42	67.3994	4.0774e+06
Class III B	NIC1832	1197.42	68.1028	4.06453e+06
Class III B	NIC1832	1112.66	69.5914	3.94374e+06
Class III B	NIC1832	1160.8	61.9599	3.26147e+06
Class III B	NIC1832	1317.08	66.906	4.31492e+06
Class III B	NIC1832	1188.07	65.9016	3.77631e+06
Class III B	NIC1832	1262.92	72.5113	4.85981e+06
Class III B	NIC1832	1263.76	70.65	4.61659e+06
Class III B	NIC1832	1238.35	66.0265	3.95105e+06
Class III B	NIC1832	1284.06	63.9881	3.84783e+06
Class III B	NIC1832	1241.36	61.7275	3.46168e+06
Class III B	NIC1832	1195.2	65.3917	3.74041e+06
Class III B	NIC1832	1202.42	69.7614	4.2827e+06
Class III B	NIC1832	1208.38	67.9779	4.08669e+06
Class III B	NIC1832	1280.06	68.0434	4.33746e+06
Class I	JU3166	1027.67	61.8299	2.8753e+06
Class I	JU3166	978.713	65.3999	3.06367e+06
Class I	JU3166	1014.26	66.478	3.28048e+06
Class I	JU3166	1021.19	64.197	3.08013e+06
Class I	JU3166	1018.43	64.6802	3.11822e+06
Class I	JU3166	1009.48	66.8507	3.30172e+06
Class I	JU3166	1088.09	62.6346	3.12412e+06
Class I	JU3166	1061	63.855	3.16621e+06
Class I	JU3166	1051.38	66.6183	3.4149e+06
Class I	JU3166	1047.39	65.8443	3.32334e+06
Class I	JU3166	1048.2	65.272	3.26836e+06
Class I	JU3166	987.932	64.5768	3.01517e+06
Class I	JU3166	1011.46	64.5573	3.08513e+06
Class I	JU3166	1043.88	65.1839	3.24611e+06
Class I	JU3166	1068.22	65.2545	3.32901e+06
Class I	JU3166	961.829	64.7447	2.95079e+06
Class I	JU3166	1105.11	62.4759	3.15692e+06
Class I	JU3166	972.874	60.4703	2.60359e+06
Class I	JU3166	1032.03	64.8164	3.17317e+06
Class II	JU1200	1166.89	67.2592	3.86337e+06
Class II	JU1200	1148.1	67.3411	3.81041e+06
Class II	JU1200	1189.61	67.6021	3.97885e+06
Class II	JU1200	1113.9	68.5277	3.82834e+06
Class II	JU1200	1070.91	66.4647	3.46231e+06
Class II	JU1200	1152.25	65.9385	3.66655e+06
Class II	JU1200	1075.96	65.3139	3.35924e+06
Class II	JU1200	1137.82	66.7329	3.7084e+06
Class II	JU1200	1125.25	69.0426	3.92568e+06
Class II	JU1200	1039.47	61.6907	2.89523e+06
Class II	JU1200	1152.11	66.6346	3.74391e+06
Class II	JU1200	1240.51	71.0268	4.58014e+06
Class II	JU1200	1118.63	70.3797	4.05523e+06
Class III A	JU440	1170.54	68.1417	3.97781e+06
Class III A	JU440	1074.49	72.7069	4.15707e+06
Class III A	JU440	1141.27	67.5407	3.81023e+06
Class III A	JU440	1183.55	74.9981	4.87215e+06
Class III A	JU440	1126.37	66.8558	3.68462e+06
Class III A	JU440	1185.03	73.1819	4.64482e+06
Class III A	JU440	1137.27	68.3976	3.89382e+06
Class III A	JU440	1102.58	65.3313	3.44419e+06
Class III A	JU440	1143.07	71.6677	4.29686e+06
Class III A	JU440	1230.32	69.4798	4.34678e+06
Class III A	JU440	1054.33	60.3218	2.80773e+06
Class III A	JU440	1132.28	68.3976	3.87674e+06
Class III A	JU440	1169.94	62.6909	3.36516e+06
Class III A	JU440	1201.97	61.5238	3.32976e+06
Class III A	JU440	1182.91	62.9285	3.42829e+06
Class III A	JU440	1081.35	62.8261	3.12376e+06
Class III A	JU2829	1297.23	63.682	3.85019e+06
Class III A	JU2829	1266.33	64.9331	3.90761e+06
Class III A	JU2829	1085.12	62.9285	3.14487e+06
Class III A	JU2829	1131.56	67.7956	3.80639e+06
Class III A	JU2829	1246.97	69.7716	4.4427e+06
Class III A	JU2829	1210.05	66.6183	3.93028e+06
Class III A	JU2829	1166	65.5658	3.66848e+06
Class III A	JU2829	1221.9	64.5727	3.72878e+06
Class III A	JU2829	1170.56	63.9471	3.50322e+06
Class III A	JU2829	1284.09	71.421	4.7938e+06
Class III A	JU2829	1156.42	62.3787	3.29321e+06
Class III A	JU2829	1213.43	67.6021	4.05852e+06
Class III A	JU2829	1218.09	70.2518	4.39975e+06
Class III A	JU2829	1331.6	73.1522	5.21508e+06
Class III A	JU2829	1119.9	65.4614	3.51222e+06
Class III A	JU2829	1206.33	70.0439	4.33151e+06
Class III A	JU2829	1229.86	69.6487	4.3663e+06
Class III B	JU751	1155.17	71.8172	4.36048e+06
Class III B	JU751	1232.59	72.8707	4.79024e+06
Class III B	JU751	1306.97	67.379	4.34258e+06
Class III B	JU751	1197.37	71.7629	4.51294e+06
Class III B	JU751	1264.99	75.4445	5.26956e+06
Class III B	JU751	1230.46	65.7398	3.89187e+06
Class III B	JU751	1311.08	77.7092	5.79436e+06
Class III B	JU751	1226.36	74.4811	4.97902e+06
Class III B	JU751	1437.56	74.5886	5.85335e+06
Class III B	JU751	1376.45	73.2597	5.40659e+06
Class III B	JU751	1333.73	71.9011	5.04628e+06
Class III B	JU751	1221.24	68.3239	4.17232e+06
Class III B	JU751	1195.09	68.7846	4.13823e+06
Class III B	JU751	1241.47	73.8801	4.95932e+06
Class III B	JU751	1243.52	68.8317	4.31184e+06
Class III B	JU751	1277.95	72.5809	4.92709e+06
Class III B	JU751	1436.26	72.241	5.4857e+06
Class III B	JU751	1234.19	68.5307	4.24215e+06
Class III B	JU2593	1314.39	74.6224	5.35667e+06
Class III B	JU2593	1496.82	85.5014	8.00848e+06
Class III B	JU2593	1255.94	73.8085	5.00742e+06
Class III B	JU2593	1481.15	81.1942	7.14629e+06
Class III B	JU2593	1385.93	75.4722	5.77761e+06
Class III B	JU2593	1416.62	73.9559	5.67062e+06
Class III B	JU2593	1232.77	76.3977	5.26592e+06
Class III B	JU2593	1380.53	76.6168	5.93097e+06
Class III B	JU2593	1466.3	73.0703	5.72978e+06
Class III B	JU2593	1266.7	69.9723	4.53896e+06
Class III B	JU2593	1486.19	78.7146	6.73933e+06
Class III B	JU2593	1287.91	72.2113	4.91507e+06
Class III B	JU2593	1337.42	79.1425	6.13084e+06
Class III B	JU2593	1404.13	76.4847	6.01159e+06
Class III B	JU2593	1267.14	80.1766	5.96146e+06
Class III B	JU2593	1429.44	76.9792	6.19934e+06
Class III B	JU2593	1427.25	65.1	4.42685e+06

## Sheet: Figure 3-supplement1D-F
strain	mean body volume (µm3) at first egg in utero	mean embryo volume (µm3)	mean number of eggs in utero at L4+30h
JU3166	2.78825e+06	24132.9	6.5
JU2593	3.3376e+06	31693.4	40.9
QG2873	3.71634e+06	30893.6	4.98
N2	3.59756e+06	31837.7	12.41
JU2829	3.44328e+06	29642.4	24.6
JU440	3.16449e+06	28398.2	15.7
JU1200	3.23908e+06	27907.3	12.03
NIC1832	2.99407e+06	25503.6	29.6
ED3005	3.47389e+06	32866.3	22.35
JU751	3.11767e+06	29211.2	41.13
QX1430	2.7203e+06	26990.6	9.75
JU830	2.97382e+06	29267.6	38.65
CB4856	2.5378e+06	32858.7	8.8
NIC1786	2.46682e+06	27003.5	15.89
JU2587	2.95936e+06	30478.7	34.3
