# Supplementary material for: Natural variation in the Caenorhabditis elegans egg-laying circuit modulates an intergenerational fitness trade-off
Source: eLife. 2024 Apr 2;12:RP88253. doi: 10.7554/eLife.88253 (PMC10987095; doi:10.7554/eLife.88253)
Supplement: Figure 3—source data 1. [file elife-88253-fig3-data1.xlsx]

## Sheet: Figure 3A and D and suppl 1A
Class	Strain	Individual	1-2 cell stage	4-26 cell stage	44-cell to gastrula stage	bean to two-fold stage	three-fold stage	L1 larva	Total offspring in utero
Class II	N2	1	4	6	1	0	0	0	11
Class II	N2	2	5	8	2	0	0	0	15
Class II	N2	3	5	5	0	0	0	0	10
Class II	N2	4	6	6	0	0	0	0	12
Class II	N2	5	6	4	0	0	0	0	10
Class II	N2	6	6	9	0	0	0	0	15
Class II	N2	7	6	5	0	0	0	0	11
Class II	N2	8	4	4	3	0	0	0	11
Class II	N2	9	8	5	0	0	0	0	13
Class II	N2	10	7	5	0	0	0	0	12
Class II	N2	11	6	8	0	0	0	0	14
Class II	N2	12	8	7	0	0	0	0	15
Class II	N2	13	4	8	2	0	0	0	14
Class II	N2	14	5	4	0	0	0	0	9
Class II	N2	15	5	5	2	0	0	0	12
Class II	N2	16	7	7	1	0	0	0	15
Class II	N2	17	5	6	0	0	0	0	11
Class II	N2	18	7	5	0	0	0	0	12
Class II	N2	19	5	6	1	0	0	0	12
Class II	N2	20	6	10	0	0	0	0	16
Class III A	JU2829	1	2	14	5	0	0	0	21
Class III A	JU2829	2	5	19	3	0	0	0	27
Class III A	JU2829	3	4	16	5	0	0	0	25
Class III A	JU2829	4	4	15	8	0	0	0	27
Class III A	JU2829	5	4	15	19	0	0	0	38
Class III A	JU2829	6	4	10	2	0	0	0	16
Class III A	JU2829	7	2	4	7	1	9	0	23
Class III A	JU2829	8	3	12	14	0	0	0	29
Class III A	JU2829	9	4	14	18	0	0	0	36
Class III A	JU2829	10	5	13	10	0	0	0	28
Class III A	JU2829	11	5	10	5	0	0	0	20
Class III A	JU2829	12	5	9	0	0	0	0	14
Class III A	JU2829	13	3	7	9	0	0	0	19
Class III A	JU2829	14	1	5	6	4	3	0	19
Class III A	JU2829	15	2	5	13	0	0	0	20
Class III A	JU2829	16	7	14	13	0	0	0	34
Class III A	JU2829	17	3	8	6	0	0	0	17
Class III A	JU2829	18	4	12	7	0	0	0	23
Class III A	JU2829	19	4	10	6	0	0	0	20
Class III A	JU2829	20	2	1	2	0	2	0	7
Class II	QX1430	1	3	4	0	0	0	0	7
Class II	QX1430	2	3	7	0	0	0	0	10
Class II	QX1430	3	6	4	0	0	0	0	10
Class II	QX1430	4	4	3	0	0	0	0	7
Class II	QX1430	5	4	4	0	0	0	0	8
Class II	QX1430	6	2	4	0	0	0	0	6
Class II	QX1430	7	3	6	0	0	0	0	9
Class II	QX1430	8	3	8	0	0	0	0	11
Class II	QX1430	9	5	4	1	0	0	0	10
Class II	QX1430	10	6	2	1	0	0	0	9
Class II	QX1430	11	4	3	4	0	0	0	11
Class II	QX1430	12	5	5	0	0	0	0	10
Class II	QX1430	13	5	1	0	0	0	0	6
Class II	QX1430	14	5	3	0	0	0	0	8
Class II	QX1430	15	5	4	0	0	0	0	9
Class II	QX1430	16	6	7	0	0	0	0	13
Class II	QX1430	17	6	1	0	0	0	0	7
Class II	QX1430	18	4	8	17	0	0	0	29
Class II	QX1430	19	5	3	0	0	0	0	8
Class II	QX1430	20	4	3	0	0	0	0	7
Class III B	JU2593	1	1	14	18	6	15	1	55
Class III B	JU2593	2	4	15	13	1	0	0	33
Class III B	JU2593	3	3	15	19	1	0	0	38
Class III B	JU2593	4	2	14	16	8	2	0	42
Class III B	JU2593	5	4	13	18	9	0	0	44
Class III B	JU2593	6	2	12	12	6	9	0	41
Class III B	JU2593	7	0	16	18	14	5	0	53
Class III B	JU2593	8	2	7	8	9	10	6	42
Class III B	JU2593	9	1	5	5	6	10	12	39
Class III B	JU2593	10	0	5	10	12	15	1	43
Class III B	JU2593	11	1	3	9	8	11	0	32
Class III B	JU2593	12	3	7	20	0	2	5	37
Class III B	JU2593	13	0	0	5	11	19	10	45
Class III B	JU2593	14	4	11	18	9	7	0	49
Class III B	JU2593	15	0	2	10	6	21	11	50
Class III B	JU2593	16	1	9	12	13	8	0	43
Class III B	JU2593	17	4	11	13	16	1	0	45
Class III B	JU2593	18	1	1	10	6	5	9	32
Class III B	JU2593	19	3	12	20	0	0	1	36
Class III B	JU2593	20	3	9	25	0	0	0	37
Class III B	NIC1832	1	4	14	19	0	0	0	37
Class III B	NIC1832	2	3	16	7	0	0	0	26
Class III B	NIC1832	3	5	16	9	0	0	0	30
Class III B	NIC1832	4	4	14	12	0	0	0	30
Class III B	NIC1832	5	4	16	9	0	1	0	30
Class III B	NIC1832	6	2	9	11	0	0	0	22
Class III B	NIC1832	7	3	10	22	0	0	0	35
Class III B	NIC1832	8	4	15	25	0	0	0	44
Class III B	NIC1832	9	7	15	16	0	0	0	38
Class III B	NIC1832	10	4	17	12	0	0	0	33
Class III B	NIC1832	11	2	15	23	0	0	0	40
Class III B	NIC1832	12	3	14	25	0	0	0	42
Class III B	NIC1832	13	1	12	24	0	0	0	37
Class III B	NIC1832	14	1	7	17	5	0	0	30
Class III B	NIC1832	15	4	13	6	1	0	0	24
Class III B	NIC1832	16	3	4	30	0	0	0	37
Class III B	NIC1832	17	3	15	4	0	0	0	22
Class III B	NIC1832	18	2	9	13	0	0	0	24
Class III B	JU2587	1	4	13	5	0	0	0	22
Class III B	JU2587	2	4	13	5	0	0	0	22
Class III B	JU2587	3	2	10	26	2	0	0	40
Class III B	JU2587	4	2	7	0	0	0	0	9
Class III B	JU2587	5	2	7	8	0	0	0	17
Class III B	JU2587	6	4	9	5	0	0	0	18
Class III B	JU2587	7	3	13	18	1	0	0	35
Class III B	JU2587	8	4	10	21	1	0	0	36
Class III B	JU2587	9	2	14	23	0	0	0	39
Class III B	JU2587	10	3	12	16	7	0	0	38
Class III B	JU2587	11	5	9	29	4	0	0	47
Class III B	JU2587	12	4	11	21	4	0	0	40
Class III B	JU2587	13	4	7	13	2	0	0	26
Class III B	JU2587	14	5	15	21	0	0	0	41
Class III B	JU2587	15	3	14	15	1	0	0	33
Class III B	JU2587	16	4	12	20	0	0	0	36
Class III B	JU2587	17	5	7	24	5	0	1	42
Class III B	JU2587	18	7	9	19	0	0	0	35
Class III B	JU2587	19	3	9	32	1	0	0	45
Class II	CB4856	1	4	3	0	0	0	0	7
Class II	CB4856	2	6	3	0	0	0	0	9
Class II	CB4856	3	2	2	0	0	0	0	4
Class II	CB4856	4	5	8	0	0	0	0	13
Class II	CB4856	5	4	5	0	0	0	0	9
Class II	CB4856	6	3	7	0	0	0	0	10
Class II	CB4856	7	3	14	0	0	0	0	17
Class II	CB4856	8	5	7	0	0	0	0	12
Class II	CB4856	9	6	1	0	0	0	0	7
Class II	CB4856	10	4	5	0	0	0	0	9
Class II	CB4856	11	2	7	0	0	0	0	9
Class II	CB4856	12	5	2	0	0	0	0	7
Class II	CB4856	13	4	5	0	0	0	0	9
Class II	CB4856	14	3	4	0	0	0	0	7
Class II	CB4856	15	1	4	0	0	0	0	5
Class II	CB4856	16	1	6	0	0	0	0	7
Class II	CB4856	17	4	4	0	0	0	0	8
Class II	CB4856	18	4	2	0	0	0	0	6
Class II	CB4856	19	2	7	0	0	0	0	9
Class II	CB4856	20	5	1	0	0	0	0	6
Class III A	JU440	1	5	3	0	0	0	0	8
Class III A	JU440	2	6	8	0	0	0	0	14
Class III A	JU440	3	6	12	3	0	0	0	21
Class III A	JU440	4	0	0	4	1	2	0	7
Class III A	JU440	5	5	12	0	0	0	0	17
Class III A	JU440	6	5	5	0	0	0	0	10
Class III A	JU440	7	6	8	0	0	0	0	14
Class III A	JU440	8	3	7	3	0	0	0	13
Class III A	JU440	9	4	6	1	0	0	0	11
Class III A	JU440	10	4	9	2	0	0	0	15
Class III A	JU440	11	2	1	4	0	0	0	7
Class III A	JU440	12	5	11	3	0	0	0	19
Class III A	JU440	13	5	12	3	0	0	0	20
Class III A	JU440	14	4	8	5	0	0	0	17
Class III A	JU440	15	6	6	0	0	0	0	12
Class III A	JU440	16	2	2	0	0	0	0	4
Class III A	JU440	17	3	6	4	0	0	0	13
Class III A	JU440	18	6	13	0	0	0	0	19
Class III A	JU440	19	4	7	0	0	0	0	11
Class III A	JU440	20	4	3	0	0	0	0	7
Class II	JU1200	1	6	5	0	0	0	0	11
Class II	JU1200	2	6	10	0	0	0	0	16
Class II	JU1200	3	5	4	0	0	0	0	9
Class II	JU1200	4	5	10	0	0	0	0	15
Class II	JU1200	5	6	2	0	0	0	0	8
Class II	JU1200	6	5	5	0	0	0	0	10
Class II	JU1200	7	4	4	0	0	0	0	8
Class II	JU1200	8	7	3	1	0	0	0	11
Class II	JU1200	9	5	4	0	0	0	0	9
Class II	JU1200	10	5	7	3	0	0	0	15
Class II	JU1200	11	4	4	3	0	0	0	11
Class II	JU1200	12	8	2	0	0	0	0	10
Class II	JU1200	13	5	7	1	0	0	0	13
Class II	JU1200	14	6	6	1	0	0	0	13
Class II	JU1200	15	3	5	5	0	0	0	13
Class II	JU1200	16	4	1	3	0	0	0	8
Class II	JU1200	17	4	1	0	0	0	0	5
Class II	JU1200	18	4	7	4	0	0	0	15
Class II	JU1200	19	6	2	2	0	0	0	10
Class II	JU1200	20	3	4	5	0	0	0	12
Class III A	ED3005	1	3	13	15	0	0	0	31
Class III A	ED3005	2	5	10	0	0	0	0	15
Class III A	ED3005	3	6	11	0	0	0	0	17
Class III A	ED3005	4	4	12	16	0	0	0	32
Class III A	ED3005	5	5	6	0	0	0	0	11
Class III A	ED3005	6	8	12	18	0	0	0	38
Class III A	ED3005	7	5	16	14	0	0	0	35
Class III A	ED3005	8	7	8	0	0	0	0	15
Class III A	ED3005	9	5	14	11	0	0	0	30
Class III A	ED3005	10	4	9	2	0	0	0	15
Class III A	ED3005	11	5	11	6	0	0	0	22
Class III A	ED3005	12	6	12	3	0	0	0	21
Class III A	ED3005	13	5	5	1	0	0	0	11
Class III A	ED3005	14	4	15	8	0	0	0	27
Class III A	ED3005	15	2	0	0	0	0	0	2
Class III A	ED3005	16	2	14	26	2	0	0	44
Class III A	ED3005	17	4	9	11	0	0	0	24
Class III A	ED3005	18	5	7	0	0	0	0	12
Class III A	ED3005	19	4	9	0	0	0	0	13
Class III A	ED3005	20	5	10	0	0	0	0	15
Class I	QG2873	1	3	2	0	0	0	0	5
Class I	QG2873	2	4	0	0	0	0	0	4
Class I	QG2873	3	3	2	0	0	0	0	5
Class I	QG2873	4	4	2	0	0	0	0	6
Class I	QG2873	5	3	0	0	0	0	0	3
Class I	QG2873	6	3	1	0	0	0	0	4
Class I	QG2873	7	3	4	0	0	0	0	7
Class I	QG2873	8	2	2	0	0	0	0	4
Class I	QG2873	9	5	1	0	0	0	0	6
Class I	QG2873	10	4	0	0	0	0	0	4
Class I	QG2873	11	6	2	0	0	0	0	8
Class I	QG2873	12	3	1	1	0	0	0	5
Class I	QG2873	13	6	0	0	0	0	0	6
Class I	QG2873	14	3	1	0	0	0	0	4
Class I	QG2873	15	0	2	0	0	0	0	2
Class I	QG2873	16	1	2	0	0	0	0	3
Class I	QG2873	17	3	2	0	0	0	0	5
Class I	QG2873	18	3	2	0	0	0	0	5
Class I	QG2873	19	2	1	0	0	0	0	3
Class I	QG2873	20	3	1	0	0	0	0	4
Class III A	JU830	1	5	16	18	0	0	0	39
Class III A	JU830	2	5	11	28	8	0	0	52
Class III A	JU830	3	5	18	10	0	0	0	33
Class III A	JU830	4	2	13	15	10	7	0	47
Class III A	JU830	5	7	17	11	0	0	0	35
Class III A	JU830	6	6	21	15	0	0	0	42
Class III A	JU830	7	4	20	14	0	0	0	38
Class III A	JU830	8	4	17	21	0	0	0	42
Class III A	JU830	9	3	15	23	3	0	0	44
Class III A	JU830	10	5	20	23	0	0	0	48
Class III A	JU830	11	7	14	10	0	0	0	31
Class III A	JU830	12	1	12	22	11	16	0	62
Class III A	JU830	13	7	16	9	0	0	0	32
Class III A	JU830	14	3	9	17	17	3	0	49
Class III A	JU830	15	6	15	15	0	0	0	36
Class III A	JU830	16	6	18	22	2	0	0	48
Class III A	JU830	17	6	14	17	0	0	0	37
Class III A	JU830	18	2	12	23	0	0	0	37
Class III A	JU830	19	7	13	14	0	0	0	34
Class III A	JU830	20	4	13	25	1	0	0	43
Class III A	NIC1786	1	4	12	0	0	0	0	16
Class III A	NIC1786	2	9	11	0	0	0	0	20
Class III A	NIC1786	3	6	6	0	0	0	0	12
Class III A	NIC1786	4	8	23	0	0	0	0	31
Class III A	NIC1786	5	6	5	0	0	0	0	11
Class III A	NIC1786	6	6	0	0	0	0	0	6
Class III A	NIC1786	7	5	16	12	0	0	0	33
Class III A	NIC1786	8	5	18	0	0	0	0	23
Class III A	NIC1786	9	4	3	0	1	0	0	8
Class III A	NIC1786	10	6	5	0	0	0	0	11
Class II	N2	2	6	4	0	0	0	0	10
Class II	N2	3	7	1	0	0	0	0	8
Class II	N2	4	7	0	0	0	0	0	7
Class II	N2	5	7	5	0	0	0	0	12
Class II	N2	6	8	6	0	0	0	0	14
Class II	N2	7	7	1	0	0	0	0	8
Class II	N2	8	7	4	0	0	0	0	11
Class II	N2	9	6	4	0	0	0	0	10
Class II	N2	10	7	5	0	0	0	0	12
Class II	N2	11	6	9	0	0	0	0	15
Class II	N2	12	7	10	0	0	0	0	17
Class II	N2	13	7	9	0	0	0	0	16
Class II	N2	14	7	7	0	0	0	0	14
Class II	N2	15	7	4	0	0	0	0	11
Class II	N2	16	7	5	0	0	0	0	12
Class II	N2	17	6	5	0	0	0	0	11
Class II	N2	18	7	10	0	0	0	0	17
Class II	N2	19	6	9	0	0	0	0	15
Class II	N2	20	7	7	0	0	0	0	14
Class III A	JU2829	1	8	12	2	0	0	0	22
Class III A	JU2829	2	8	9	4	0	0	0	21
Class III A	JU2829	3	7	16	25	0	0	0	48
Class III A	JU2829	4	6	11	1	0	0	0	18
Class III A	JU2829	5	6	18	6	0	0	0	30
Class III A	JU2829	6	8	17	3	0	0	0	28
Class III A	JU2829	7	7	14	2	0	0	0	23
Class III A	JU2829	8	7	13	1	0	0	0	21
Class III A	JU2829	9	7	16	2	0	0	0	25
Class III A	JU2829	10	5	12	2	0	0	0	19
Class III A	JU2829	11	5	16	5	0	0	0	26
Class III A	JU2829	12	8	15	5	0	0	0	28
Class III A	JU2829	13	5	13	6	0	0	0	24
Class III A	JU2829	14	5	17	0	0	0	0	22
Class III A	JU2829	15	5	14	8	0	0	0	27
Class III A	JU2829	16	6	17	0	0	0	0	23
Class III A	JU2829	17	7	19	3	0	0	0	29
Class III A	JU2829	18	8	10	6	0	0	0	24
Class III A	JU2829	19	5	17	10	0	0	0	32
Class III A	JU2829	20	5	16	10	0	0	0	31
Class III B	JU751	1	7	19	16	0	0	0	42
Class III B	JU751	2	8	19	21	5	3	0	56
Class III B	JU751	3	8	17	20	2	1	0	48
Class III B	JU751	4	7	15	23	7	0	0	52
Class III B	JU751	5	6	17	13	0	0	0	36
Class III B	JU751	6	9	18	14	5	0	0	46
Class III B	JU751	7	9	19	17	0	0	0	45
Class III B	JU751	8	4	16	15	11	3	0	49
Class III B	JU751	9	4	8	13	19	18	0	62
Class III B	JU751	10	3	19	19	1	0	0	42
Class III B	JU751	11	6	17	7	0	0	0	30
Class III B	JU751	12	5	12	21	3	0	0	41
Class III B	JU751	13	8	16	10	0	0	0	34
Class III B	JU751	14	6	17	9	0	0	0	32
Class III B	JU751	15	4	18	11	2	0	0	35
Class III B	JU751	16	6	17	10	1	0	0	34
Class III B	JU751	17	2	11	16	14	6	0	49
Class III B	JU751	18	4	20	14	2	0	0	40
Class III B	JU751	19	5	21	16	5	0	0	47
Class III B	JU751	20	4	17	21	0	0	0	42
Class II	QX1430	1	8	1	0	0	0	0	9
Class II	QX1430	2	7	4	0	0	0	0	11
Class II	QX1430	3	7	0	0	0	0	0	7
Class II	QX1430	4	5	5	0	0	0	0	10
Class II	QX1430	5	7	4	0	0	0	0	11
Class II	QX1430	6	7	1	0	0	0	0	8
Class II	QX1430	7	7	5	0	0	0	0	12
Class II	QX1430	8	5	2	0	0	0	0	7
Class II	QX1430	9	5	4	0	0	0	0	9
Class II	QX1430	10	6	3	0	0	0	0	9
Class II	QX1430	11	8	2	0	0	0	0	10
Class II	QX1430	12	6	1	0	0	0	0	7
Class II	QX1430	13	8	2	0	0	0	0	10
Class II	QX1430	14	8	4	0	0	0	0	12
Class II	QX1430	15	7	1	0	0	0	0	8
Class II	QX1430	16	7	2	0	0	0	0	9
Class II	QX1430	17	6	7	0	0	0	0	13
Class II	QX1430	18	6	5	0	0	0	0	11
Class II	QX1430	19	8	5	0	0	0	0	13
Class II	QX1430	20	5	4	0	0	0	0	9
Class III B	JU2593	1	3	11	16	9	18	0	57
Class III B	JU2593	2	3	12	14	1	1	0	31
Class III B	JU2593	3	3	3	10	5	11	0	32
Class III B	JU2593	4	3	9	18	9	6	1	46
Class III B	JU2593	5	0	6	8	13	8	2	37
Class III B	JU2593	6	2	14	21	1	1	0	39
Class III B	JU2593	7	1	5	23	8	9	3	49
Class III B	JU2593	8	1	5	8	1	0	0	15
Class III B	JU2593	9	2	8	12	13	5	1	41
Class III B	JU2593	10	1	10	11	7	4	0	33
Class III B	JU2593	11	6	22	2	12	0	3	45
Class III B	JU2593	12	3	9	26	4	1	0	43
Class III B	JU2593	13	2	11	22	7	0	0	42
Class III B	JU2593	14	0	7	16	14	14	4	55
Class III B	JU2593	15	0	0	16	4	9	2	31
Class III B	JU2593	16	3	8	14	7	21	0	53
Class III B	JU2593	17	0	1	8	4	6	2	21
Class III B	JU2593	18	3	5	22	6	13	0	49
Class III B	JU2593	19	0	6	18	9	6	0	39
Class III B	JU2593	20	2	10	14	8	7	1	42
Class III B	NIC1832	1	3	17	10	3	5	0	38
Class III B	NIC1832	2	3	14	17	2	0	0	36
Class III B	NIC1832	3	4	17	19	3	0	0	43
Class III B	NIC1832	4	5	17	16	0	0	0	38
Class III B	NIC1832	5	2	16	18	2	1	0	39
Class III B	NIC1832	6	3	10	8	5	0	0	26
Class III B	NIC1832	7	3	6	11	1	3	0	24
Class III B	NIC1832	8	3	12	17	6	0	0	38
Class III B	NIC1832	9	4	19	10	0	0	0	33
Class III B	NIC1832	10	6	11	9	0	0	0	26
Class III B	NIC1832	11	5	13	6	0	0	0	24
Class III B	NIC1832	12	6	13	8	0	0	0	27
Class III B	NIC1832	13	5	19	15	0	0	0	39
Class III B	NIC1832	14	7	15	1	0	0	0	23
Class III B	NIC1832	15	6	14	11	1	0	0	32
Class III B	NIC1832	16	5	10	7	0	1	0	23
Class III B	NIC1832	17	3	10	6	0	0	0	19
Class III B	NIC1832	18	6	11	5	0	0	0	22
Class III B	NIC1832	19	6	13	9	0	0	1	29
Class III B	NIC1832	20	4	15	5	0	0	0	24
Class II	CB4856	1	8	2	0	0	0	0	10
Class II	CB4856	2	6	5	0	0	0	0	11
Class II	CB4856	3	5	11	0	0	0	0	16
Class II	CB4856	4	7	3	0	0	0	0	10
Class II	CB4856	5	6	2	0	0	0	0	8
Class II	CB4856	6	6	11	0	0	0	0	17
Class II	CB4856	7	7	3	0	0	0	0	10
Class II	CB4856	8	6	2	0	0	0	0	8
Class II	CB4856	9	8	1	0	0	0	0	9
Class II	CB4856	10	7	1	0	0	0	0	8
Class II	CB4856	11	5	3	0	0	0	0	8
Class II	CB4856	12	3	3	0	0	0	0	6
Class II	CB4856	13	6	2	0	0	0	0	8
Class II	CB4856	14	2	3	0	0	0	0	5
Class II	CB4856	15	6	2	0	0	0	0	8
Class II	CB4856	16	4	2	0	0	0	0	6
Class II	CB4856	17	6	2	0	0	0	0	8
Class II	CB4856	18	5	4	0	0	0	0	9
Class II	CB4856	19	5	2	0	0	0	0	7
Class II	CB4856	20	6	4	0	0	0	0	10
Class III A	ED3005	1	7	16	12	0	0	0	35
Class III A	ED3005	2	9	17	15	0	0	0	41
Class III A	ED3005	3	7	8	0	0	0	0	15
Class III A	ED3005	4	1	6	8	4	2	0	21
Class III A	ED3005	5	9	6	0	0	0	0	15
Class III A	ED3005	6	7	17	11	7	6	0	48
Class III A	ED3005	7	5	5	0	0	0	0	10
Class III A	ED3005	8	7	10	0	0	1	0	18
Class III A	ED3005	9	6	11	0	0	0	0	17
Class III A	ED3005	10	5	14	15	1	0	0	35
Class III A	ED3005	11	2	19	14	1	0	0	36
Class III A	ED3005	12	6	10	0	0	0	0	16
Class III A	ED3005	13	6	9	1	0	0	0	16
Class III A	ED3005	14	6	8	0	0	0	0	14
Class III A	ED3005	15	5	15	10	6	0	0	36
Class III A	ED3005	16	5	8	0	0	0	0	13
Class III A	ED3005	17	3	12	3	0	0	0	18
Class III A	ED3005	18	7	7	0	0	0	0	14
Class III A	ED3005	19	6	17	3	0	0	0	26
Class III A	ED3005	20	5	11	4	0	0	0	20
Class III A	JU440	1	10	19	0	0	0	0	29
Class III A	JU440	2	9	5	0	0	0	0	14
Class III A	JU440	3	11	15	0	0	0	0	26
Class III A	JU440	4	7	16	0	0	0	0	23
Class III A	JU440	5	8	18	0	0	0	0	26
Class III A	JU440	6	9	13	0	0	0	0	22
Class III A	JU440	7	5	1	0	0	0	0	6
Class III A	JU440	8	8	10	0	0	0	0	18
Class III A	JU440	9	9	18	0	0	0	0	27
Class III A	JU440	10	9	6	0	0	0	0	15
Class III A	JU440	11	6	15	0	0	0	0	21
Class III A	JU440	12	5	14	3	0	0	0	22
Class III A	JU440	13	7	14	0	0	0	0	21
Class III A	JU440	14	6	13	0	0	0	0	19
Class III A	JU440	15	10	7	0	0	0	0	17
Class III A	JU440	16	7	12	0	0	0	0	19
Class III A	JU440	17	8	11	0	0	0	0	19
Class III A	JU440	18	5	3	0	0	0	0	8
Class III A	JU440	19	7	3	0	0	0	0	10
Class III A	JU440	20	3	4	0	0	0	0	7
Class I	JU3166	1	5	0	0	0	0	0	5
Class I	JU3166	2	7	0	0	0	0	0	7
Class I	JU3166	3	6	1	0	0	0	0	7
Class I	JU3166	4	8	1	0	0	0	0	9
Class I	JU3166	5	5	1	0	0	0	0	6
Class I	JU3166	6	6	5	0	0	0	0	11
Class I	JU3166	7	6	1	0	0	0	0	7
Class I	JU3166	8	6	1	0	0	0	0	7
Class I	JU3166	9	7	1	0	0	0	0	8
Class I	JU3166	10	6	1	0	0	0	0	7
Class I	JU3166	11	8	1	0	0	0	0	9
Class I	JU3166	12	3	0	0	0	0	0	3
Class I	JU3166	13	4	1	0	0	0	0	5
Class I	JU3166	14	4	1	0	0	0	0	5
Class I	JU3166	15	4	0	0	0	0	0	4
Class I	JU3166	16	2	2	0	0	0	0	4
Class I	JU3166	17	2	2	0	0	0	0	4
Class I	JU3166	18	3	3	0	0	0	0	6
Class I	JU3166	19	6	1	0	0	0	0	7
Class I	JU3166	20	4	1	0	0	0	0	5
Class III A	JU830	1	6	20	15	0	0	0	41
Class III A	JU830	2	4	15	21	0	0	0	40
Class III A	JU830	3	8	20	11	0	0	0	39
Class III A	JU830	4	5	17	16	0	0	0	38
Class III A	JU830	5	7	15	12	0	0	0	34
Class III A	JU830	6	8	17	10	0	0	0	35
Class III A	JU830	7	8	19	10	0	0	0	37
Class III A	JU830	8	4	15	20	1	0	0	40
Class III A	JU830	9	6	16	22	0	0	0	44
Class III A	JU830	10	4	9	21	0	0	0	34
Class III A	JU830	11	8	14	4	0	0	0	26
Class III A	JU830	12	4	24	17	5	0	0	50
Class III A	JU830	13	8	14	2	0	0	0	24
Class III A	JU830	14	6	16	18	0	0	0	40
Class III A	JU830	15	5	9	2	0	0	0	16
Class III A	JU830	16	5	15	10	0	0	0	30
Class III A	JU830	17	4	16	10	0	9	0	39
Class III A	JU830	18	8	15	14	0	0	0	37
Class III A	JU830	19	7	16	10	0	0	0	33
Class III A	JU830	20	8	16	16	0	0	0	40
Class III A	NIC1786	1	6	7	0	0	0	0	13
Class III A	NIC1786	2	5	5	0	0	0	0	10
Class III A	NIC1786	3	6	5	0	0	0	0	11
Class III A	NIC1786	4	6	4	0	0	0	0	10
Class III A	NIC1786	5	7	8	0	0	0	0	15
Class III A	NIC1786	6	7	9	0	0	0	0	16
Class III A	NIC1786	7	10	16	3	0	0	0	29
Class III A	NIC1786	8	4	8	0	0	0	0	12
Class III A	NIC1786	9	3	12	0	0	0	0	15
Class III A	NIC1786	10	5	9	0	0	0	0	14
Class III A	NIC1786	11	2	10	13	0	0	0	25
Class III A	NIC1786	12	6	4	0	0	0	0	10
Class III A	NIC1786	13	4	11	2	0	0	0	17
Class III A	NIC1786	14	7	9	0	0	0	0	16
Class III A	NIC1786	15	5	11	0	0	0	0	16
Class III A	NIC1786	16	5	4	0	0	0	0	9
Class III A	NIC1786	17	5	10	1	0	0	0	16
Class III A	NIC1786	18	7	3	0	0	0	0	10
Class III A	NIC1786	19	10	6	0	0	0	0	16
Class III A	NIC1786	20	8	3	0	0	0	0	11
Class III B	JU751	1	2	0	11	3	5	1	22
Class III B	JU751	2	8	11	27	1	0	0	47
Class III B	JU751	3	3	14	31	5	0	0	53
Class III B	JU751	4	6	10	23	3	0	0	42
Class III B	JU751	5	5	11	23	5	0	0	44
Class III B	JU751	6	5	8	13	4	5	0	35
Class III B	JU751	7	6	14	12	0	0	0	32
Class III B	JU751	8	8	10	24	0	0	0	42
Class III B	JU751	9	8	12	21	0	0	0	41
Class III B	JU751	10	5	1	13	1	3	2	25
Class III B	JU751	11	4	15	29	2	0	0	50
Class III B	JU751	12	6	9	9	0	1	0	25
Class III B	JU751	13	4	12	30	0	0	0	46
Class III B	JU751	14	3	11	16	0	0	0	30
Class III B	JU751	15	3	9	30	0	0	0	42
Class III B	JU751	16	8	10	21	0	0	0	39
Class III B	JU751	17	4	10	21	0	0	0	35
Class III B	JU751	18	7	14	16	0	0	0	37
Class III B	JU751	19	6	15	24	0	0	0	45
Class III B	JU751	20	4	13	33	0	1	0	51
Class III B	JU2587	1	5	16	18	0	0	0	39
Class III B	JU2587	2	4	15	4	0	0	0	23
Class III B	JU2587	3	6	15	11	0	1	0	33
Class III B	JU2587	4	4	13	14	0	0	0	31
Class III B	JU2587	5	4	18	16	4	0	0	42
Class III B	JU2587	6	5	13	19	4	0	0	41
Class III B	JU2587	7	3	20	17	4	0	0	44
Class III B	JU2587	8	5	18	18	5	0	0	46
Class III B	JU2587	9	8	16	4	0	0	0	28
Class III B	JU2587	10	6	16	9	0	0	0	31
Class III B	JU2587	11	5	14	22	0	0	0	41
Class III B	JU2587	12	6	10	9	0	0	0	25
Class III B	JU2587	13	3	15	26	0	0	0	44
Class III B	JU2587	14	5	18	18	0	0	0	41
Class III B	JU2587	15	8	13	17	0	0	0	38
Class III B	JU2587	16	3	13	22	3	7	0	48
Class III B	JU2587	17	6	22	11	0	0	0	39
Class III B	JU2587	18	4	14	26	0	0	0	44
Class III B	JU2587	19	4	15	20	0	0	0	39
Class III B	JU2587	20	7	12	15	0	0	0	34
Class I	QG2873	1	4	1	0	0	0	0	5
Class I	QG2873	2	4	0	0	0	0	0	4
Class I	QG2873	3	5	2	0	0	0	0	7
Class I	QG2873	4	3	1	0	0	0	0	4
Class I	QG2873	5	3	1	0	0	0	0	4
Class I	QG2873	6	5	1	0	0	0	0	6
Class I	QG2873	7	5	1	0	0	0	0	6
Class I	QG2873	8	4	1	0	0	0	0	5
Class I	QG2873	9	5	2	0	0	0	0	7
Class I	QG2873	10	4	0	0	0	0	0	4
Class I	QG2873	11	4	1	0	0	0	0	5
Class I	QG2873	12	5	4	0	0	0	0	9
Class I	QG2873	13	3	2	0	0	0	0	5
Class I	QG2873	14	5	1	0	1	0	0	7
Class I	QG2873	15	3	0	0	0	0	0	3
Class I	QG2873	16	4	0	0	0	0	0	4
Class I	QG2873	17	4	1	0	1	0	0	6
Class I	QG2873	18	4	0	0	0	0	0	4
Class I	QG2873	19	5	1	0	0	0	0	6
Class I	QG2873	20	2	2	0	1	0	0	5
Class II	JU1200	1	7	1	0	0	0	0	8
Class II	JU1200	2	9	7	0	0	0	0	16
Class II	JU1200	3	9	4	0	0	0	0	13
Class II	JU1200	4	7	7	0	0	0	0	14
Class II	JU1200	5	7	8	0	0	0	0	15
Class II	JU1200	6	5	4	0	0	0	0	9
Class II	JU1200	7	1	8	4	0	0	0	13
Class II	JU1200	8	6	10	0	0	0	0	16
Class II	JU1200	9	7	8	0	0	0	0	15
Class II	JU1200	10	7	9	0	0	0	0	16
Class II	JU1200	11	5	5	0	0	0	0	10
Class II	JU1200	12	8	1	0	0	0	0	9
Class II	JU1200	13	5	12	0	0	0	0	17
Class II	JU1200	14	8	8	0	0	0	0	16
Class II	JU1200	15	7	4	0	0	0	0	11
Class II	JU1200	16	6	10	0	0	0	0	16
Class II	JU1200	17	7	4	0	0	0	0	11
Class II	JU1200	18	6	6	0	0	0	0	12
Class II	JU1200	19	6	9	0	0	0	0	15
Class II	JU1200	20	6	1	0	0	0	0	7
Class I	JU3166	1	6	0	0	0	0	0	6
Class I	JU3166	2	7	2	0	0	0	0	9
Class I	JU3166	3	5	2	0	0	0	0	7
Class I	JU3166	4	6	0	0	0	0	0	6
Class I	JU3166	5	5	2	0	0	0	0	7
Class I	JU3166	6	2	2	0	0	0	0	4
Class I	JU3166	7	6	0	0	0	0	0	6
Class I	JU3166	8	4	0	0	0	0	0	4
Class I	JU3166	9	5	0	0	0	0	0	5
Class I	JU3166	10	5	1	0	0	0	0	6
Class I	JU3166	11	6	0	0	0	0	0	6
Class I	JU3166	12	7	1	0	0	0	0	8
Class I	JU3166	13	4	3	0	0	0	0	7
Class I	JU3166	14	6	0	0	0	0	0	6
Class I	JU3166	15	5	2	0	0	0	0	7
Class I	JU3166	16	5	2	0	0	0	0	7
Class I	JU3166	17	6	1	0	0	0	0	7
Class I	JU3166	18	7	5	0	0	0	0	12
Class I	JU3166	19	7	2	0	0	0	0	9
Class I	JU3166	20	5	0	0	0	0	0	5
Class III A	NIC1786	1	7	10	0	0	0	0	17
Class III A	NIC1786	2	5	10	0	0	0	0	15
Class III A	NIC1786	3	6	12	0	0	0	0	18
Class III A	NIC1786	4	6	4	0	0	0	0	10
Class III A	NIC1786	5	6	19	0	0	0	0	25
Class III A	NIC1786	6	6	19	0	0	0	0	25

## Sheet: Figure 3B
Class	Strain	latitude	longitude
Class II	N2	51.45	-2.59
Class III A	JU2829	46.632	1.064
Class II	QX1430	51.45	-2.59
Class III B	JU2593	48.8226	2.22233
Class III B	NIC1832	47.3675	-2.52884
Class III B	JU2587	45.0267	3.87202
Class II	CB4856	21.33	-157.86
Class III A	JU440	48.715	1.56
Class II	JU1200	55.577	-4.6
Class III A	ED3005	55.94	-3.36
Class I	QG2873	-27.369	152.183
Class III A	JU830	48.52	9.05
Class III A	NIC1786	28.4111	-16.5355
Class III B	JU751	48.84	2.5
Class I	JU3166	0.28417	6.59837

## Sheet: Figure 3C and 3E
Class	Strain	Stage	Individual	Number of eggs in utero	Number of larvae in utero	Total offspring in utero	Absence/presence of Larvae	Absence/presence of eggs
Class I	JU3166	L4+24H	1	6	0	6	0	1
Class I	JU3166	L4+24H	2	9	0	9	0	1
Class I	JU3166	L4+24H	3	7	0	7	0	1
Class I	JU3166	L4+24H	4	9	0	9	0	1
Class I	JU3166	L4+24H	5	7	0	7	0	1
Class I	JU3166	L4+24H	6	8	0	8	0	1
Class I	JU3166	L4+24H	7	8	0	8	0	1
Class I	JU3166	L4+24H	8	9	0	9	0	1
Class I	JU3166	L4+24H	9	7	0	7	0	1
Class I	JU3166	L4+24H	1	16	0	16	0	1
Class I	JU3166	L4+24H	2	10	0	10	0	1
Class I	JU3166	L4+24H	3	7	0	7	0	1
Class I	JU3166	L4+24H	4	9	0	9	0	1
Class I	JU3166	L4+24H	5	9	0	9	0	1
Class I	JU3166	L4+24H	6	9	0	9	0	1
Class I	JU3166	L4+24H	7	9	0	9	0	1
Class I	JU3166	L4+24H	8	6	0	6	0	1
Class I	JU3166	L4+24H	9	7	0	7	0	1
Class I	JU3166	L4+24H	10	6	0	6	0	1
Class I	JU3166	L4+24H	11	11	0	11	0	1
Class I	QG2873	L4+24H	1	6	0	6	0	1
Class I	QG2873	L4+24H	2	7	0	7	0	1
Class I	QG2873	L4+24H	3	7	0	7	0	1
Class I	QG2873	L4+24H	4	5	0	5	0	1
Class I	QG2873	L4+24H	5	4	0	4	0	1
Class I	QG2873	L4+24H	6	5	0	5	0	1
Class I	QG2873	L4+24H	7	5	0	5	0	1
Class I	QG2873	L4+24H	8	3	0	3	0	1
Class I	QG2873	L4+24H	1	5	0	5	0	1
Class I	QG2873	L4+24H	2	5	0	5	0	1
Class I	QG2873	L4+24H	3	6	0	6	0	1
Class I	QG2873	L4+24H	4	5	0	5	0	1
Class I	QG2873	L4+24H	5	4	0	4	0	1
Class I	QG2873	L4+24H	6	5	0	5	0	1
Class I	QG2873	L4+24H	7	4	0	4	0	1
Class I	QG2873	L4+24H	8	8	0	8	0	1
Class I	QG2873	L4+24H	9	6	0	6	0	1
Class I	QG2873	L4+24H	10	3	0	3	0	1
Class I	QG2873	L4+24H	1	4	0	4	0	1
Class I	QG2873	L4+24H	2	6	0	6	0	1
Class I	QG2873	L4+24H	3	6	0	6	0	1
Class I	QG2873	L4+24H	4	5	0	5	0	1
Class I	QG2873	L4+24H	5	4	0	4	0	1
Class I	QG2873	L4+24H	6	6	0	6	0	1
Class I	QG2873	L4+24H	7	4	0	4	0	1
Class I	QG2873	L4+24H	8	4	0	4	0	1
Class I	QG2873	L4+24H	9	2	0	2	0	1
Class I	QG2873	L4+24H	10	4	0	4	0	1
Class II	N2	L4+24H	1	10	0	10	0	1
Class II	N2	L4+24H	2	15	0	15	0	1
Class II	N2	L4+24H	3	15	0	15	0	1
Class II	N2	L4+24H	4	15	0	15	0	1
Class II	N2	L4+24H	5	15	0	15	0	1
Class II	N2	L4+24H	6	18	0	18	0	1
Class II	N2	L4+24H	7	15	0	15	0	1
Class II	N2	L4+24H	8	21	0	21	0	1
Class II	N2	L4+24H	9	14	0	14	0	1
Class II	N2	L4+24H	10	11	0	11	0	1
Class II	N2	L4+24H	1	16	0	16	0	1
Class II	N2	L4+24H	2	15	0	15	0	1
Class II	N2	L4+24H	3	13	0	13	0	1
Class II	N2	L4+24H	4	21	0	21	0	1
Class II	N2	L4+24H	5	15	0	15	0	1
Class II	N2	L4+24H	6	16	0	16	0	1
Class II	N2	L4+24H	7	15	0	15	0	1
Class II	N2	L4+24H	8	12	0	12	0	1
Class II	N2	L4+24H	9	20	0	20	0	1
Class II	N2	L4+24H	1	18	0	18	0	1
Class II	N2	L4+24H	2	16	0	16	0	1
Class II	N2	L4+24H	3	19	0	19	0	1
Class II	N2	L4+24H	4	22	0	22	0	1
Class II	N2	L4+24H	5	15	0	15	0	1
Class II	N2	L4+24H	6	12	0	12	0	1
Class II	N2	L4+24H	7	25	0	25	0	1
Class II	N2	L4+24H	8	11	0	11	0	1
Class III A	JU440	L4+48H	1	23	0	23	0	1
Class III A	JU440	L4+48H	2	20	0	20	0	1
Class III A	JU440	L4+48H	3	35	0	35	0	1
Class III A	JU440	L4+48H	4	31	0	31	0	1
Class III A	JU440	L4+48H	5	21	0	21	0	1
Class III A	JU440	L4+48H	6	29	0	29	0	1
Class III A	JU440	L4+48H	7	27	0	27	0	1
Class III A	JU440	L4+48H	8	22	0	22	0	1
Class III A	JU440	L4+48H	9	18	0	18	0	1
Class III A	JU440	L4+48H	10		0	0	0	0
Class III A	JU440	L4+48H	1	17	0	17	0	1
Class III A	JU440	L4+48H	2	55	0	55	0	1
Class III A	JU440	L4+48H	3	30	0	30	0	1
Class III A	JU440	L4+48H	4	46	0	46	0	1
Class III A	JU440	L4+48H	5	43	0	43	0	1
Class III A	JU440	L4+48H	6	53	0	53	0	1
Class III A	JU440	L4+48H	7	26	0	26	0	1
Class III A	JU440	L4+48H	8	58	0	58	0	1
Class III A	JU440	L4+48H	9	62	0	62	0	1
Class III A	JU440	L4+48H	10	32	0	32	0	1
Class III A	JU440	L4+48H	1	41	0	41	0	1
Class III A	JU440	L4+48H	2	43	0	43	0	1
Class III A	JU440	L4+48H	3	36	0	36	0	1
Class III A	JU440	L4+48H	4	15	1	16	1	0
Class III A	JU440	L4+48H	5	7	0	7	0	1
Class III A	JU440	L4+48H	6	19	0	19	0	1
Class III A	JU440	L4+48H	7	44	0	44	0	1
Class III A	JU440	L4+48H	8	29	0	29	0	1
Class III A	JU440	L4+48H	9	58	0	58	0	1
Class III A	JU440	L4+48H	10	28	0	28	0	1
Class II	N2	L4+48H	1	17	0	17	0	1
Class II	N2	L4+48H	2	20	0	20	0	1
Class II	N2	L4+48H	3	16	0	16	0	1
Class II	N2	L4+48H	4	24	0	24	0	1
Class II	N2	L4+48H	5	13	0	13	0	1
Class II	N2	L4+48H	6	13	0	13	0	1
Class II	N2	L4+48H	7	12	0	12	0	1
Class II	N2	L4+48H	8	20	0	20	0	1
Class II	N2	L4+48H	9	13	0	13	0	1
Class II	N2	L4+48H	10		0	0	0	0
Class II	N2	L4+48H	1	17	0	17	0	1
Class II	N2	L4+48H	2	19	0	19	0	1
Class II	N2	L4+48H	3	11	0	11	0	1
Class II	N2	L4+48H	4	12	0	12	0	1
Class II	N2	L4+48H	5	20	0	20	0	1
Class II	N2	L4+48H	6	23	0	23	0	1
Class II	N2	L4+48H	7	8	0	8	0	1
Class II	N2	L4+48H	8	11	0	11	0	1
Class II	N2	L4+48H	9	18	0	18	0	1
Class II	N2	L4+48H	10	9	0	9	0	1
Class II	N2	L4+48H	1	18	0	18	0	1
Class II	N2	L4+48H	2	19	0	19	0	1
Class II	N2	L4+48H	3	11	0	11	0	1
Class II	N2	L4+48H	4	22	0	22	0	1
Class II	N2	L4+48H	5	18	0	18	0	1
Class II	N2	L4+48H	6	19	0	19	0	1
Class II	N2	L4+48H	7	17	0	17	0	1
Class II	N2	L4+48H	8	14	0	14	0	1
Class II	N2	L4+48H	9	16	0	16	0	1
Class II	N2	L4+48H	10	20	0	20	0	1
Class III A	JU440	L4+72H	1	9	2	11	1	0
Class III A	JU440	L4+72H	2	2	0	2	0	1
Class III A	JU440	L4+72H	3	15	0	15	0	1
Class III A	JU440	L4+72H	4	0	0	0	0	0
Class III A	JU440	L4+72H	5	0	0	0	0	0
Class III A	JU440	L4+72H	6	0	0	0	0	0
Class III A	JU440	L4+72H	7	0	0	0	0	0
Class III A	JU440	L4+72H	8	0	0	0	0	0
Class III A	JU440	L4+72H	9	1	1	2	1	0
Class III A	JU440	L4+72H	10	2	1	3	1	0
Class III A	JU440	L4+72H	11	1	0	1	0	1
Class III A	JU440	L4+72H	1	0	1	1	1	0
Class III A	JU440	L4+72H	2	4	2	6	1	0
Class III A	JU440	L4+72H	3	0	0	0	0	0
Class III A	JU440	L4+72H	4	2	0	2	0	1
Class III A	JU440	L4+72H	5	4	0	4	0	1
Class III A	JU440	L4+72H	6	0	0	0	0	0
Class III A	JU440	L4+72H	7	4	0	4	0	1
Class III A	JU440	L4+72H	8	2	0	2	0	1
Class III A	JU440	L4+72H	9	4	2	6	1	0
Class III A	JU440	L4+72H	10	2	0	2	0	1
Class III A	JU440	L4+72H	1	2	0	2	0	1
Class III A	JU440	L4+72H	2	0	0	0	0	0
Class III A	JU440	L4+72H	3	0	0	0	0	0
Class III A	JU440	L4+72H	4	0	0	0	0	0
Class III A	JU440	L4+72H	5	0	0	0	0	0
Class III A	JU440	L4+72H	6	1	0	1	0	1
Class III A	JU440	L4+72H	7	3	0	3	0	1
Class III A	JU440	L4+72H	8	3	0	3	0	1
Class III A	JU440	L4+72H	9	2	0	2	0	1
Class III A	JU440	L4+72H	10	3	0	3	0	1
Class II	N2	L4+72H	1	4	0	4	0	1
Class II	N2	L4+72H	2	3	0	3	0	1
Class II	N2	L4+72H	3	0	0	0	0	0
Class II	N2	L4+72H	4	3	0	3	0	1
Class II	N2	L4+72H	5	0	0	0	0	0
Class II	N2	L4+72H	6	7	0	7	0	1
Class II	N2	L4+72H	7	0	0	0	0	0
Class II	N2	L4+72H	8	2	0	2	0	1
Class II	N2	L4+72H	9	4	0	4	0	1
Class II	N2	L4+72H	10	2	0	2	0	1
Class II	N2	L4+72H	11	1	0	1	0	1
Class II	N2	L4+72H	12	4	0	4	0	1
Class II	N2	L4+72H	13	3	0	3	0	1
Class II	N2	L4+72H	14	6	0	6	0	1
Class II	N2	L4+72H	15	5	0	5	0	1
Class II	N2	L4+72H	1	0	0	0	0	0
Class II	N2	L4+72H	2	2	0	2	0	1
Class II	N2	L4+72H	3	0	0	0	0	0
Class II	N2	L4+72H	4	3	0	3	0	1
Class II	N2	L4+72H	5	3	0	3	0	1
Class II	N2	L4+72H	6	3	0	3	0	1
Class II	N2	L4+72H	7	8	0	8	0	1
Class II	N2	L4+72H	8	4	0	4	0	1
Class II	N2	L4+72H	9	1	0	1	0	1
Class II	N2	L4+72H	10	3	0	3	0	1
Class II	N2	L4+72H	11	3	0	3	0	1
Class II	N2	L4+72H	1	2	0	2	0	1
Class II	N2	L4+72H	2	2	0	2	0	1
Class II	N2	L4+72H	3	3	0	3	0	1
Class II	N2	L4+72H	4	2	0	2	0	1
Class II	N2	L4+72H	5	0	0	0	0	0
Class II	N2	L4+72H	6	3	0	3	0	1
Class II	N2	L4+72H	7	1	0	1	0	1
Class II	N2	L4+72H	8	6	0	6	0	1
Class II	N2	L4+72H	9	2	0	2	0	1
Class II	N2	L4+72H	10	1	0	1	0	1
Class III A	ED3005	L4+24H	1	15	0	15	0	1
Class III A	ED3005	L4+24H	2	17	0	17	0	1
Class III A	ED3005	L4+24H	3	5	0	5	0	1
Class III A	ED3005	L4+24H	4	17	0	17	0	1
Class III A	ED3005	L4+24H	5	11	0	11	0	1
Class III A	ED3005	L4+24H	6	12	0	12	0	1
Class III A	ED3005	L4+24H	7	15	0	15	0	1
Class III A	ED3005	L4+24H	8	17	0	17	0	1
Class III A	ED3005	L4+24H	9	12	0	12	0	1
Class III A	ED3005	L4+24H	10	15	0	15	0	1
Class III A	ED3005	L4+24H	1	17	0	17	0	1
Class III A	ED3005	L4+24H	2	21	0	21	0	1
Class III A	ED3005	L4+24H	3	10	0	10	0	1
Class III A	ED3005	L4+24H	4	14	0	14	0	1
Class III A	ED3005	L4+24H	5	19	0	19	0	1
Class III A	ED3005	L4+24H	6	15	0	15	0	1
Class III A	ED3005	L4+24H	7	13	0	13	0	1
Class III A	ED3005	L4+24H	8	17	0	17	0	1
Class III A	ED3005	L4+24H	9	18	0	18	0	1
Class III A	ED3005	L4+24H	10	13	0	13	0	1
Class III A	ED3005	L4+24H	1	14	0	14	0	1
Class III A	ED3005	L4+24H	2	16	0	16	0	1
Class III A	ED3005	L4+24H	3	20	0	20	0	1
Class III A	ED3005	L4+24H	4	16	0	16	0	1
Class III A	ED3005	L4+24H	5	20	0	20	0	1
Class III A	ED3005	L4+24H	6	19	0	19	0	1
Class III A	ED3005	L4+24H	7	11	0	11	0	1
Class III A	ED3005	L4+24H	8	17	0	17	0	1
Class III A	ED3005	L4+24H	9	16	0	16	0	1
Class III A	ED3005	L4+24H	10	25	0	25	0	1
Class II	JU1200	L4+24H	1	11	0	11	0	1
Class II	JU1200	L4+24H	2	13	0	13	0	1
Class II	JU1200	L4+24H	3	9	0	9	0	1
Class II	JU1200	L4+24H	4	9	0	9	0	1
Class II	JU1200	L4+24H	5	10	0	10	0	1
Class II	JU1200	L4+24H	6	11	0	11	0	1
Class II	JU1200	L4+24H	7	13	0	13	0	1
Class II	JU1200	L4+24H	8	12	0	12	0	1
Class II	JU1200	L4+24H	9	7	0	7	0	1
Class II	JU1200	L4+24H	10	14	0	14	0	1
Class II	JU1200	L4+24H	1	11	0	11	0	1
Class II	JU1200	L4+24H	2	10	0	10	0	1
Class II	JU1200	L4+24H	3	13	0	13	0	1
Class II	JU1200	L4+24H	4	15	0	15	0	1
Class II	JU1200	L4+24H	5	7	0	7	0	1
Class II	JU1200	L4+24H	6	14	0	14	0	1
Class II	JU1200	L4+24H	7	11	0	11	0	1
Class II	JU1200	L4+24H	8	13	0	13	0	1
Class II	JU1200	L4+24H	9	14	0	14	0	1
Class II	JU1200	L4+24H	10	13	0	13	0	1
Class II	JU1200	L4+24H	1	10	0	10	0	1
Class II	JU1200	L4+24H	2	11	0	11	0	1
Class II	JU1200	L4+24H	3	11	0	11	0	1
Class II	JU1200	L4+24H	4	10	0	10	0	1
Class II	JU1200	L4+24H	5	14	0	14	0	1
Class II	JU1200	L4+24H	6	7	0	7	0	1
Class II	JU1200	L4+24H	7	13	0	13	0	1
Class II	JU1200	L4+24H	8	14	0	14	0	1
Class II	JU1200	L4+24H	9	5	0	5	0	1
Class II	JU1200	L4+24H	10	14	0	14	0	1
Class III A	ED3005	L4+48H	1	19	0	19	0	1
Class III A	ED3005	L4+48H	2	25	0	25	0	1
Class III A	ED3005	L4+48H	3	25	0	25	0	1
Class III A	ED3005	L4+48H	4	26	0	26	0	1
Class III A	ED3005	L4+48H	5	21	0	21	0	1
Class III A	ED3005	L4+48H	6	26	0	26	0	1
Class III A	ED3005	L4+48H	7	21	0	21	0	1
Class III A	ED3005	L4+48H	8	20	0	20	0	1
Class III A	ED3005	L4+48H	9	23	0	23	0	1
Class III A	ED3005	L4+48H	10	15	0	15	0	1
Class III A	ED3005	L4+48H	1	20	0	20	0	1
Class III A	ED3005	L4+48H	2	22	0	22	0	1
Class III A	ED3005	L4+48H	3	28	0	28	0	1
Class III A	ED3005	L4+48H	4	24	0	24	0	1
Class III A	ED3005	L4+48H	5	21	0	21	0	1
Class III A	ED3005	L4+48H	6	26	0	26	0	1
Class III A	ED3005	L4+48H	7	20	0	20	0	1
Class III A	ED3005	L4+48H	8	18	0	18	0	1
Class III A	ED3005	L4+48H	9	24	0	24	0	1
Class III A	ED3005	L4+48H	10	22	0	22	0	1
Class III A	ED3005	L4+48H	1	26	0	26	0	1
Class III A	ED3005	L4+48H	2	17	0	17	0	1
Class III A	ED3005	L4+48H	3	9	0	9	0	1
Class III A	ED3005	L4+48H	4	18	0	18	0	1
Class III A	ED3005	L4+48H	5	16	0	16	0	1
Class III A	ED3005	L4+48H	6	16	0	16	0	1
Class III A	ED3005	L4+48H	7	26	0	26	0	1
Class III A	ED3005	L4+48H	8	20	0	20	0	1
Class III A	ED3005	L4+48H	9	24	0	24	0	1
Class III A	ED3005	L4+48H	10	8	0	8	0	1
Class I	JU3166	L4+48H	1	7	0	7	0	1
Class I	JU3166	L4+48H	2	11	0	11	0	1
Class I	JU3166	L4+48H	3	12	0	12	0	1
Class I	JU3166	L4+48H	4	12	0	12	0	1
Class I	JU3166	L4+48H	5	5	0	5	0	1
Class I	JU3166	L4+48H	6	4	0	4	0	1
Class I	JU3166	L4+48H	7	3	0	3	0	1
Class I	JU3166	L4+48H	8	9	0	9	0	1
Class I	JU3166	L4+48H	9	2	0	2	0	1
Class I	JU3166	L4+48H	10	8	0	8	0	1
Class I	JU3166	L4+48H	1	10	0	10	0	1
Class I	JU3166	L4+48H	2	10	0	10	0	1
Class I	JU3166	L4+48H	3	11	0	11	0	1
Class I	JU3166	L4+48H	4	9	0	9	0	1
Class I	JU3166	L4+48H	5	12	0	12	0	1
Class I	JU3166	L4+48H	6	9	0	9	0	1
Class I	JU3166	L4+48H	7	10	0	10	0	1
Class I	JU3166	L4+48H	8	11	0	11	0	1
Class I	JU3166	L4+48H	9	11	0	11	0	1
Class I	JU3166	L4+48H	10	12	0	12	0	1
Class I	JU3166	L4+48H	1	4	0	4	0	1
Class I	JU3166	L4+48H	2	0	0	0	0	0
Class I	JU3166	L4+48H	3	9	0	9	0	1
Class I	JU3166	L4+48H	4	8	0	8	0	1
Class I	JU3166	L4+48H	5	12	0	12	0	1
Class I	JU3166	L4+48H	6	8	0	8	0	1
Class I	JU3166	L4+48H	7	9	0	9	0	1
Class I	JU3166	L4+48H	8	2	0	2	0	1
Class I	JU3166	L4+48H	9	11	0	11	0	1
Class I	JU3166	L4+48H	10	10	0	10	0	1
Class II	CB4856	L4+48H	1	5	0	5	0	1
Class II	CB4856	L4+48H	2	16	0	16	0	1
Class II	CB4856	L4+48H	3	8	0	8	0	1
Class II	CB4856	L4+48H	4	9	0	9	0	1
Class II	CB4856	L4+48H	5	31	0	31	0	1
Class II	CB4856	L4+48H	6	10	0	10	0	1
Class II	CB4856	L4+48H	7	17	0	17	0	1
Class II	CB4856	L4+48H	8	12	1	13	1	0
Class II	CB4856	L4+48H	9	9	0	9	0	1
Class II	CB4856	L4+48H	10	10	0	10	0	1
Class II	CB4856	L4+48H	1	10	0	10	0	1
Class II	CB4856	L4+48H	2	19	0	19	0	1
Class II	CB4856	L4+48H	3	16	0	16	0	1
Class II	CB4856	L4+48H	4	10	0	10	0	1
Class II	CB4856	L4+48H	5	3	0	3	0	1
Class II	CB4856	L4+48H	6	9	0	9	0	1
Class II	CB4856	L4+48H	7	13	0	13	0	1
Class II	CB4856	L4+48H	8	14	0	14	0	1
Class II	CB4856	L4+48H	9	4	0	4	0	1
Class II	CB4856	L4+48H	10	12	0	12	0	1
Class II	CB4856	L4+48H	1	16	0	16	0	1
Class II	CB4856	L4+48H	2	21	0	21	0	1
Class II	CB4856	L4+48H	3	10	0	10	0	1
Class II	CB4856	L4+48H	4	10	0	10	0	1
Class II	CB4856	L4+48H	5	11	0	11	0	1
Class II	CB4856	L4+48H	6	13	0	13	0	1
Class II	CB4856	L4+48H	7	6	0	6	0	1
Class II	CB4856	L4+48H	8	13	0	13	0	1
Class II	CB4856	L4+48H	9	7	0	7	0	1
Class II	CB4856	L4+48H	10	9	0	9	0	1
Class I	QG2873	L4+72H	1	5	0	5	0	1
Class I	QG2873	L4+72H	2	1	0	1	0	1
Class I	QG2873	L4+72H	3	8	0	8	0	1
Class I	QG2873	L4+72H	4	4	0	4	0	1
Class I	QG2873	L4+72H	5	5	0	5	0	1
Class I	QG2873	L4+72H	6	6	0	6	0	1
Class I	QG2873	L4+72H	7	3	0	3	0	1
Class I	QG2873	L4+72H	8	4	0	4	0	1
Class I	QG2873	L4+72H	9	0	0	0	0	0
Class I	QG2873	L4+72H	1	3	0	3	0	1
Class I	QG2873	L4+72H	2	5	0	5	0	1
Class I	QG2873	L4+72H	3	0	0	0	0	0
Class I	QG2873	L4+72H	4	3	0	3	0	1
Class I	QG2873	L4+72H	5	4	0	4	0	1
Class I	QG2873	L4+72H	6	0	0	0	0	0
Class I	QG2873	L4+72H	7	2	0	2	0	1
Class I	QG2873	L4+72H	8	3	0	3	0	1
Class I	QG2873	L4+72H	9	0	0	0	0	0
Class I	QG2873	L4+72H	10	4	0	4	0	1
Class I	QG2873	L4+72H	1	6	0	6	0	1
Class I	QG2873	L4+72H	2	2	0	2	0	1
Class I	QG2873	L4+72H	3	0	0	0	0	0
Class I	QG2873	L4+72H	4	4	0	4	0	1
Class I	QG2873	L4+72H	5	4	0	4	0	1
Class I	QG2873	L4+72H	6	4	0	4	0	1
Class I	QG2873	L4+72H	7	0	0	0	0	0
Class I	QG2873	L4+72H	8	0	0	0	0	0
Class I	QG2873	L4+72H	9	1	0	1	0	1
Class I	QG2873	L4+72H	10	0	0	0	0	0
Class II	CB4856	L4+72H	1	0	0	0	0	0
Class II	CB4856	L4+72H	2	1	0	1	0	1
Class II	CB4856	L4+72H	3	0	0	0	0	0
Class II	CB4856	L4+72H	4	4	0	4	0	1
Class II	CB4856	L4+72H	5	2	0	2	0	1
Class II	CB4856	L4+72H	6	0	0	0	0	0
Class II	CB4856	L4+72H	7	1	0	1	0	1
Class II	CB4856	L4+72H	8	1	0	1	0	1
Class II	CB4856	L4+72H	9	4	0	4	0	1
Class II	CB4856	L4+72H	10	6	0	6	0	1
Class II	CB4856	L4+72H	1	3	0	3	0	1
Class II	CB4856	L4+72H	2	4	0	4	0	1
Class II	CB4856	L4+72H	3	9	0	9	0	1
Class II	CB4856	L4+72H	4	6	0	6	0	1
Class II	CB4856	L4+72H	5	4	0	4	0	1
Class II	CB4856	L4+72H	6	10	0	10	0	1
Class II	CB4856	L4+72H	7	4	0	4	0	1
Class II	CB4856	L4+72H	8	0	0	0	0	0
Class II	CB4856	L4+72H	9	4	0	4	0	1
Class II	CB4856	L4+72H	10	4	0	4	0	1
Class II	CB4856	L4+72H	1	4	0	4	0	1
Class II	CB4856	L4+72H	2	0	0	0	0	0
Class II	CB4856	L4+72H	3	1	0	1	0	1
Class II	CB4856	L4+72H	4	11	0	11	0	1
Class II	CB4856	L4+72H	5	7	0	7	0	1
Class II	CB4856	L4+72H	6	0	0	0	0	0
Class II	CB4856	L4+72H	7	0	0	0	0	0
Class II	CB4856	L4+72H	8	9	0	9	0	1
Class II	CB4856	L4+72H	9	0	0	0	0	0
Class II	CB4856	L4+72H	10	0	0	0	0	0
Class III A	ED3005	L4+72H	1	7	0	7	0	1
Class III A	ED3005	L4+72H	2	2	0	2	0	1
Class III A	ED3005	L4+72H	3	0	0	0	0	0
Class III A	ED3005	L4+72H	4	5	0	5	0	1
Class III A	ED3005	L4+72H	5	7	0	7	0	1
Class III A	ED3005	L4+72H	6	11	0	11	0	1
Class III A	ED3005	L4+72H	7	4	0	4	0	1
Class III A	ED3005	L4+72H	8	3	0	3	0	1
Class III A	ED3005	L4+72H	9	0	0	0	0	0
Class III A	ED3005	L4+72H	10	1	0	1	0	1
Class III A	ED3005	L4+72H	1	6	0	6	0	1
Class III A	ED3005	L4+72H	2	7	0	7	0	1
Class III A	ED3005	L4+72H	3	3	0	3	0	1
Class III A	ED3005	L4+72H	4	6	0	6	0	1
Class III A	ED3005	L4+72H	5	9	0	9	0	1
Class III A	ED3005	L4+72H	6	0	0	0	0	0
Class III A	ED3005	L4+72H	7	7	0	7	0	1
Class III A	ED3005	L4+72H	8	0	0	0	0	0
Class III A	ED3005	L4+72H	9	1	0	1	0	1
Class III A	ED3005	L4+72H	10	1	0	1	0	1
Class III A	ED3005	L4+72H	1	1	0	1	0	1
Class III A	ED3005	L4+72H	2	0	0	0	0	0
Class III A	ED3005	L4+72H	3	0	0	0	0	0
Class III A	ED3005	L4+72H	4	1	0	1	0	1
Class III A	ED3005	L4+72H	5	3	0	3	0	1
Class III A	ED3005	L4+72H	6	0	0	0	0	0
Class III A	ED3005	L4+72H	7	0	0	0	0	0
Class III A	ED3005	L4+72H	8	0	0	0	0	0
Class III A	ED3005	L4+72H	9	0	0	0	0	0
Class III A	ED3005	L4+72H	10	0	0	0	0	0
Class III A	JU830	L4+24H	1	33	0	33	0	1
Class III A	JU830	L4+24H	2	38	0	38	0	1
Class III A	JU830	L4+24H	3	31	0	31	0	1
Class III A	JU830	L4+24H	4	25	0	25	0	1
Class III A	JU830	L4+24H	5	22	0	22	0	1
Class III A	JU830	L4+24H	6	31	0	31	0	1
Class III A	JU830	L4+24H	7	52	0	52	0	1
Class III A	JU830	L4+24H	8	19	0	19	0	1
Class III A	JU830	L4+24H	9	21	0	21	0	1
Class III A	JU830	L4+24H	10	19	0	19	0	1
Class III A	JU830	L4+24H	1	25	0	25	0	1
Class III A	JU830	L4+24H	2	19	0	19	0	1
Class III A	JU830	L4+24H	3	32	0	32	0	1
Class III A	JU830	L4+24H	4	21	0	21	0	1
Class III A	JU830	L4+24H	5	17	0	17	0	1
Class III A	JU830	L4+24H	6	30	0	30	0	1
Class III A	JU830	L4+24H	7	20	0	20	0	1
Class III A	JU830	L4+24H	8	30	0	30	0	1
Class III A	JU830	L4+24H	9	24	0	24	0	1
Class III A	JU830	L4+24H	10	27	0	27	0	1
Class III A	JU830	L4+24H	1	46	0	46	0	1
Class III A	JU830	L4+24H	2	23	0	23	0	1
Class III A	JU830	L4+24H	3	21	0	21	0	1
Class III A	JU830	L4+24H	4	23	0	23	0	1
Class III A	JU830	L4+24H	5	33	0	33	0	1
Class III A	JU830	L4+24H	6	28	0	28	0	1
Class III A	JU830	L4+24H	7	27	0	27	0	1
Class III A	JU830	L4+24H	8	26	0	26	0	1
Class III A	JU830	L4+24H	9	34	0	34	0	1
Class III A	JU830	L4+24H	10	0	0	0	0	0
Class II	QX1430	L4+24H	1	4	0	4	0	1
Class II	QX1430	L4+24H	2	5	0	5	0	1
Class II	QX1430	L4+24H	3	9	0	9	0	1
Class II	QX1430	L4+24H	4	7	0	7	0	1
Class II	QX1430	L4+24H	5	10	0	10	0	1
Class II	QX1430	L4+24H	6	8	0	8	0	1
Class II	QX1430	L4+24H	7	9	0	9	0	1
Class II	QX1430	L4+24H	8	11	0	11	0	1
Class II	QX1430	L4+24H	9	8	0	8	0	1
Class II	QX1430	L4+24H	10	11	0	11	0	1
Class II	QX1430	L4+24H	1	12	0	12	0	1
Class II	QX1430	L4+24H	2	14	0	14	0	1
Class II	QX1430	L4+24H	3	11	0	11	0	1
Class II	QX1430	L4+24H	4	12	0	12	0	1
Class II	QX1430	L4+24H	5	9	0	9	0	1
Class II	QX1430	L4+24H	6	9	0	9	0	1
Class II	QX1430	L4+24H	7	13	0	13	0	1
Class II	QX1430	L4+24H	8	9	0	9	0	1
Class II	QX1430	L4+24H	9	2	0	2	0	1
Class II	QX1430	L4+24H	10	2	0	2	0	1
Class II	QX1430	L4+24H	1	13	0	13	0	1
Class II	QX1430	L4+24H	2	10	0	10	0	1
Class II	QX1430	L4+24H	3	10	0	10	0	1
Class II	QX1430	L4+24H	4	9	0	9	0	1
Class II	QX1430	L4+24H	5	13	0	13	0	1
Class II	QX1430	L4+24H	6	6	0	6	0	1
Class II	QX1430	L4+24H	7	48	2	50	1	0
Class II	QX1430	L4+24H	8	11	0	11	0	1
Class II	QX1430	L4+24H	9	5	0	5	0	1
Class II	QX1430	L4+24H	10	9	0	9	0	1
Class III B	JU2587	L4+24H	1	29	0	29	0	1
Class III B	JU2587	L4+24H	2	36	0	36	0	1
Class III B	JU2587	L4+24H	3	44	0	44	0	1
Class III B	JU2587	L4+24H	4	34	0	34	0	1
Class III B	JU2587	L4+24H	5	39	0	39	0	1
Class III B	JU2587	L4+24H	6	51	0	51	0	1
Class III B	JU2587	L4+24H	7	43	0	43	0	1
Class III B	JU2587	L4+24H	8	32	0	32	0	1
Class III B	JU2587	L4+24H	9	49	0	49	0	1
Class III B	JU2587	L4+24H	10	35	0	35	0	1
Class III B	JU2587	L4+24H	1	60	0	60	0	1
Class III B	JU2587	L4+24H	2	30	0	30	0	1
Class III B	JU2587	L4+24H	3	31	1	32	1	0
Class III B	JU2587	L4+24H	4	27	0	27	0	1
Class III B	JU2587	L4+24H	5	33	0	33	0	1
Class III B	JU2587	L4+24H	6	30	0	30	0	1
Class III B	JU2587	L4+24H	7	32	0	32	0	1
Class III B	JU2587	L4+24H	8	30	0	30	0	1
Class III B	JU2587	L4+24H	9	26	0	26	0	1
Class III B	JU2587	L4+24H	10	27	0	27	0	1
Class III B	JU2587	L4+24H	1	41	0	41	0	1
Class III B	JU2587	L4+24H	2	36	0	36	0	1
Class III B	JU2587	L4+24H	3	50	0	50	0	1
Class III B	JU2587	L4+24H	4	54	0	54	0	1
Class III B	JU2587	L4+24H	5	47	0	47	0	1
Class III B	JU2587	L4+24H	6	39	0	39	0	1
Class III B	JU2587	L4+24H	7	42	0	42	0	1
Class III B	JU2587	L4+24H	8	33	0	33	0	1
Class III B	JU2587	L4+24H	9	30	0	30	0	1
Class III B	JU2587	L4+24H	10	28	0	28	0	1
Class II	N2	L4+24H	1	15	0	15	0	1
Class II	N2	L4+24H	2	14	0	14	0	1
Class II	N2	L4+24H	3	10	0	10	0	1
Class II	N2	L4+24H	4	18	0	18	0	1
Class II	N2	L4+24H	5	16	0	16	0	1
Class II	N2	L4+24H	6	6	0	6	0	1
Class II	N2	L4+24H	7	13	0	13	0	1
Class II	N2	L4+24H	8	14	0	14	0	1
Class II	N2	L4+24H	9	23	0	23	0	1
Class II	N2	L4+24H	10	14	0	14	0	1
Class II	N2	L4+24H	1	13	0	13	0	1
Class II	N2	L4+24H	2	14	0	14	0	1
Class II	N2	L4+24H	3	17	0	17	0	1
Class II	N2	L4+24H	4	11	0	11	0	1
Class II	N2	L4+24H	5	16	0	16	0	1
Class II	N2	L4+24H	6	15	0	15	0	1
Class II	N2	L4+24H	7	17	0	17	0	1
Class II	N2	L4+24H	8	11	0	11	0	1
Class II	N2	L4+24H	9	16	0	16	0	1
Class II	N2	L4+24H	10	7	0	7	0	1
Class II	N2	L4+24H	1	10	0	10	0	1
Class II	N2	L4+24H	2	11	0	11	0	1
Class II	N2	L4+24H	3	13	0	13	0	1
Class II	N2	L4+24H	4	15	0	15	0	1
Class II	N2	L4+24H	5	13	0	13	0	1
Class II	N2	L4+24H	6	10	0	10	0	1
Class II	N2	L4+24H	7	12	0	12	0	1
Class II	N2	L4+24H	8	13	0	13	0	1
Class II	N2	L4+24H	9	14	0	14	0	1
Class II	N2	L4+24H	10	19	0	19	0	1
Class III A	JU830	L4+48H	1	38	0	38	0	1
Class III A	JU830	L4+48H	2	53	0	53	0	1
Class III A	JU830	L4+48H	3	50	0	50	0	1
Class III A	JU830	L4+48H	4	47	0	47	0	1
Class III A	JU830	L4+48H	5	18	0	18	0	1
Class III A	JU830	L4+48H	6	47	0	47	0	1
Class III A	JU830	L4+48H	7	50	0	50	0	1
Class III A	JU830	L4+48H	8	42	0	42	0	1
Class III A	JU830	L4+48H	9	35	0	35	0	1
Class III A	JU830	L4+48H	10	26	0	26	0	1
Class III A	JU830	L4+48H	1	43	0	43	0	1
Class III A	JU830	L4+48H	2	30	0	30	0	1
Class III A	JU830	L4+48H	3	42	1	43	1	0
Class III A	JU830	L4+48H	4	19	2	21	1	0
Class III A	JU830	L4+48H	5	62	0	62	0	1
Class III A	JU830	L4+48H	6	45	0	45	0	1
Class III A	JU830	L4+48H	7	49	0	49	0	1
Class III A	JU830	L4+48H	8	47	0	47	0	1
Class III A	JU830	L4+48H	9	40	0	40	0	1
Class III A	JU830	L4+48H	10	32	0	32	0	1
Class III A	JU830	L4+48H	1	6	4	10	1	0
Class III A	JU830	L4+48H	2	38	0	38	0	1
Class III A	JU830	L4+48H	3	43	0	43	0	1
Class III A	JU830	L4+48H	4	37	0	37	0	1
Class III A	JU830	L4+48H	5	45	1	46	1	0
Class III A	JU830	L4+48H	6	49	0	49	0	1
Class III A	JU830	L4+48H	7	62	1	63	1	0
Class III A	JU830	L4+48H	8	0	0	0	0	0
Class III A	JU830	L4+48H	9	0	0	0	0	0
Class III A	JU830	L4+48H	10	0	0	0	0	0
Class II	QX1430	L4+48H	1	16	0	16	0	1
Class II	QX1430	L4+48H	2	12	0	12	0	1
Class II	QX1430	L4+48H	3	15	0	15	0	1
Class II	QX1430	L4+48H	4	12	0	12	0	1
Class II	QX1430	L4+48H	5	16	0	16	0	1
Class II	QX1430	L4+48H	6	13	0	13	0	1
Class II	QX1430	L4+48H	7	16	0	16	0	1
Class II	QX1430	L4+48H	8	27	0	27	0	1
Class II	QX1430	L4+48H	9	14	0	14	0	1
Class II	QX1430	L4+48H	10	17	0	17	0	1
Class II	QX1430	L4+48H	1	10	0	10	0	1
Class II	QX1430	L4+48H	2	14	0	14	0	1
Class II	QX1430	L4+48H	3	20	0	20	0	1
Class II	QX1430	L4+48H	4	9	0	9	0	1
Class II	QX1430	L4+48H	5	11	0	11	0	1
Class II	QX1430	L4+48H	6	10	0	10	0	1
Class II	QX1430	L4+48H	7	16	0	16	0	1
Class II	QX1430	L4+48H	8	17	0	17	0	1
Class II	QX1430	L4+48H	9	8	0	8	0	1
Class II	QX1430	L4+48H	10	11	0	11	0	1
Class II	QX1430	L4+48H	1	10	0	10	0	1
Class II	QX1430	L4+48H	2	13	0	13	0	1
Class II	QX1430	L4+48H	3	8	0	8	0	1
Class II	QX1430	L4+48H	4	14	0	14	0	1
Class II	QX1430	L4+48H	5	13	0	13	0	1
Class II	QX1430	L4+48H	6	10	0	10	0	1
Class II	QX1430	L4+48H	7	11	0	11	0	1
Class II	QX1430	L4+48H	8	16	0	16	0	1
Class II	QX1430	L4+48H	9	15	0	15	0	1
Class II	QX1430	L4+48H	10	0	0	0	0	0
Class III B	JU2587	L4+48H	1	48	0	48	0	1
Class III B	JU2587	L4+48H	2	22	28	50	1	0
Class III B	JU2587	L4+48H	3	56	2	58	1	0
Class III B	JU2587	L4+48H	4	26	7	33	1	0
Class III B	JU2587	L4+48H	5	7	11	18	1	0
Class III B	JU2587	L4+48H	6	48	0	48	0	1
Class III B	JU2587	L4+48H	7	47	0	47	0	1
Class III B	JU2587	L4+48H	8	43	0	43	0	1
Class III B	JU2587	L4+48H	9	30	0	30	0	1
Class III B	JU2587	L4+48H	10	41	3	44	1	0
Class III B	JU2587	L4+48H	1	26	4	30	1	0
Class III B	JU2587	L4+48H	2	24	6	30	1	0
Class III B	JU2587	L4+48H	3	27	8	35	1	0
Class III B	JU2587	L4+48H	4	31	0	31	0	1
Class III B	JU2587	L4+48H	5	25	0	25	0	1
Class III B	JU2587	L4+48H	6	25	5	30	1	0
Class III B	JU2587	L4+48H	7	68	0	68	0	1
Class III B	JU2587	L4+48H	8	29	8	37	1	0
Class III B	JU2587	L4+48H	9	29	1	30	1	0
Class III B	JU2587	L4+48H	10	24	13	37	1	0
Class III B	JU2587	L4+48H	1	10	8	18	1	0
Class III B	JU2587	L4+48H	2	83	0	83	0	1
Class III B	JU2587	L4+48H	3	17	3	20	1	0
Class III B	JU2587	L4+48H	4	29	10	39	1	0
Class III B	JU2587	L4+48H	5	44	5	49	1	0
Class III B	JU2587	L4+48H	6	29	4	33	1	0
Class III B	JU2587	L4+48H	7	41	0	41	0	1
Class III B	JU2587	L4+48H	8	60	0	60	0	1
Class III B	JU2587	L4+48H	9	44	0	44	0	1
Class III B	JU2587	L4+48H	10	0	0	0	0	0
Class III A	JU2829	L4+72H	1	7	0	7	0	1
Class III A	JU2829	L4+72H	2	4	0	4	0	1
Class III A	JU2829	L4+72H	3	1	0	1	0	1
Class III A	JU2829	L4+72H	4	12	0	12	0	1
Class III A	JU2829	L4+72H	5	3	0	3	0	1
Class III A	JU2829	L4+72H	6	3	0	3	0	1
Class III A	JU2829	L4+72H	7	8	4	12	1	0
Class III A	JU2829	L4+72H	8	1	0	1	0	1
Class III A	JU2829	L4+72H	9	6	1	7	1	0
Class III A	JU2829	L4+72H	10	1	0	1	0	1
Class III A	JU2829	L4+72H	1	6	1	7	1	0
Class III A	JU2829	L4+72H	2	1	1	2	1	0
Class III A	JU2829	L4+72H	3	11	0	11	0	1
Class III A	JU2829	L4+72H	4	17	1	18	1	0
Class III A	JU2829	L4+72H	5	6	0	6	0	1
Class III A	JU2829	L4+72H	6	6	0	6	0	1
Class III A	JU2829	L4+72H	7	2	4	6	1	0
Class III A	JU2829	L4+72H	8	0	0	0	0	0
Class III A	JU2829	L4+72H	9	0	0	0	0	0
Class III A	JU2829	L4+72H	10	0	0	0	0	0
Class III A	JU2829	L4+72H	1	4	0	4	0	1
Class III A	JU2829	L4+72H	2	6	0	6	0	1
Class III A	JU2829	L4+72H	3	6	3	9	1	0
Class III A	JU2829	L4+72H	4	2	0	2	0	1
Class III A	JU2829	L4+72H	5	10	1	11	1	0
Class III A	JU2829	L4+72H	6	0	2	2	1	0
Class III A	JU2829	L4+72H	7	0	1	1	1	0
Class III A	JU2829	L4+72H	8	2	1	3	1	0
Class III A	JU2829	L4+72H	9	11	0	11	0	1
Class III A	JU2829	L4+72H	10	2	2	4	1	0
Class III A	JU830	L4+72H	1	4	1	5	1	0
Class III A	JU830	L4+72H	2	0	0	0	0	0
Class III A	JU830	L4+72H	3	0	0	0	0	0
Class III A	JU830	L4+72H	4	0	0	0	0	0
Class III A	JU830	L4+72H	5	2	3	5	1	0
Class III A	JU830	L4+72H	6	8	0	8	0	1
Class III A	JU830	L4+72H	7	0	1	1	1	0
Class III A	JU830	L4+72H	8	0	2	2	1	0
Class III A	JU830	L4+72H	9	0	0	0	0	0
Class III A	JU830	L4+72H	10	0	0	0	0	0
Class III A	JU830	L4+72H	1	0	2	2	1	0
Class III A	JU830	L4+72H	2	0	2	2	1	0
Class III A	JU830	L4+72H	3	0	1	1	1	0
Class III A	JU830	L4+72H	4	0	1	1	1	0
Class III A	JU830	L4+72H	5	1	1	2	1	0
Class III A	JU830	L4+72H	6	1	1	2	1	0
Class III A	JU830	L4+72H	7	0	2	2	1	0
Class III A	JU830	L4+72H	8	0	0	0	0	0
Class III A	JU830	L4+72H	9	0	0	0	0	0
Class III A	JU830	L4+72H	10	3	3	6	1	0
Class II	N2	L4+72H	1	0	0	0	0	0
Class II	N2	L4+72H	2	3	0	3	0	1
Class II	N2	L4+72H	3	0	0	0	0	0
Class II	N2	L4+72H	4	0	0	0	0	0
Class II	N2	L4+72H	5	0	0	0	0	0
Class II	N2	L4+72H	6	2	0	2	0	1
Class II	N2	L4+72H	7	0	0	0	0	0
Class II	N2	L4+72H	8	0	0	0	0	0
Class II	N2	L4+72H	9	0	0	0	0	0
Class II	N2	L4+72H	10	0	0	0	0	0
Class II	N2	L4+72H	1	0	0	0	0	0
Class II	N2	L4+72H	2	1	0	1	0	1
Class II	N2	L4+72H	3	0	0	0	0	0
Class II	N2	L4+72H	4	0	0	0	0	0
Class II	N2	L4+72H	5	1	0	1	0	1
Class II	N2	L4+72H	6	0	0	0	0	0
Class II	N2	L4+72H	7	1	0	1	0	1
Class II	N2	L4+72H	8	0	0	0	0	0
Class II	N2	L4+72H	9	0	0	0	0	0
Class II	N2	L4+72H	10	1	0	1	0	1
Class II	N2	L4+72H	1	1	0	1	0	1
Class II	N2	L4+72H	2	0	0	0	0	0
Class II	N2	L4+72H	3	1	0	1	0	1
Class II	N2	L4+72H	4	0	0	0	0	0
Class II	N2	L4+72H	5	3	0	3	0	1
Class II	N2	L4+72H	6	0	0	0	0	0
Class II	N2	L4+72H	7	0	0	0	0	0
Class II	N2	L4+72H	8	0	0	0	0	0
Class II	N2	L4+72H	9	0	0	0	0	0
Class II	N2	L4+72H	10	0	0	0	0	0
Class II	QX1430	L4+72H	1	0	0	0	0	0
Class II	QX1430	L4+72H	2	0	0	0	0	0
Class II	QX1430	L4+72H	3	8	0	8	0	1
Class II	QX1430	L4+72H	4	0	0	0	0	0
Class II	QX1430	L4+72H	5	0	0	0	0	0
Class II	QX1430	L4+72H	6	0	0	0	0	0
Class II	QX1430	L4+72H	7	0	0	0	0	0
Class II	QX1430	L4+72H	8	1	0	1	0	1
Class II	QX1430	L4+72H	9	2	0	2	0	1
Class II	QX1430	L4+72H	10	2	0	2	0	1
Class II	QX1430	L4+72H	1	2	0	2	0	1
Class II	QX1430	L4+72H	2	0	0	0	0	0
Class II	QX1430	L4+72H	3	2	0	2	0	1
Class II	QX1430	L4+72H	4	5	0	5	0	1
Class II	QX1430	L4+72H	5	0	0	0	0	0
Class II	QX1430	L4+72H	6	0	0	0	0	0
Class II	QX1430	L4+72H	7	0	0	0	0	0
Class II	QX1430	L4+72H	8	13	0	13	0	1
Class II	QX1430	L4+72H	9	0	0	0	0	0
Class II	QX1430	L4+72H	10	1	0	1	0	1
Class II	QX1430	L4+72H	1	0	0	0	0	0
Class II	QX1430	L4+72H	2	0	0	0	0	0
Class II	QX1430	L4+72H	3	1	0	1	0	1
Class II	QX1430	L4+72H	4	0	0	0	0	0
Class II	QX1430	L4+72H	5	0	0	0	0	0
Class II	QX1430	L4+72H	6	0	0	0	0	0
Class II	QX1430	L4+72H	7	0	0	0	0	0
Class II	QX1430	L4+72H	8	0	0	0	0	0
Class II	QX1430	L4+72H	9	0	0	0	0	0
Class II	QX1430	L4+72H	10	16	0	16	0	1
Class III B	JU2593	L4+24H	1	57	0	57	0	1
Class III B	JU2593	L4+24H	2	53	0	53	0	1
Class III B	JU2593	L4+24H	3	41	0	41	0	1
Class III B	JU2593	L4+24H	4	34	0	34	0	1
Class III B	JU2593	L4+24H	5	49	2	51	1	0
Class III B	JU2593	L4+24H	6	52	0	52	0	1
Class III B	JU2593	L4+24H	7	41	0	41	0	1
Class III B	JU2593	L4+24H	8	51	0	51	0	1
Class III B	JU2593	L4+24H	9	40	0	40	0	1
Class III B	JU2593	L4+24H	10	53	1	54	1	0
Class III B	JU2593	L4+24H	1	46	0	46	0	1
Class III B	JU2593	L4+24H	2	41	0	41	0	1
Class III B	JU2593	L4+24H	3	46	0	46	0	1
Class III B	JU2593	L4+24H	4	48	0	48	0	1
Class III B	JU2593	L4+24H	5	44	0	44	0	1
Class III B	JU2593	L4+24H	6	47	0	47	0	1
Class III B	JU2593	L4+24H	7	45	0	45	0	1
Class III B	JU2593	L4+24H	8	46	0	46	0	1
Class III B	JU2593	L4+24H	9	47	0	47	0	1
Class III B	JU2593	L4+24H	1	44	0	44	0	1
Class III B	JU2593	L4+24H	2	58	0	58	0	1
Class III B	JU2593	L4+24H	3	48	0	48	0	1
Class III B	JU2593	L4+24H	4	42	1	43	1	0
Class III B	JU2593	L4+24H	5	43	2	45	1	0
Class III B	JU2593	L4+24H	6	54	0	54	0	1
Class III B	JU2593	L4+24H	7	53	0	53	0	1
Class III B	JU2593	L4+24H	8	34	0	34	0	1
Class III B	JU2593	L4+24H	9	50	1	51	1	0
Class III A	NIC1786	L4+24H	1	16	0	16	0	1
Class III A	NIC1786	L4+24H	2	22	0	22	0	1
Class III A	NIC1786	L4+24H	3	17	0	17	0	1
Class III A	NIC1786	L4+24H	4	21	0	21	0	1
Class III A	NIC1786	L4+24H	5	18	0	18	0	1
Class III A	NIC1786	L4+24H	6	17	0	17	0	1
Class III A	NIC1786	L4+24H	7	14	0	14	0	1
Class III A	NIC1786	L4+24H	8	13	0	13	0	1
Class III A	NIC1786	L4+24H	9	10	0	10	0	1
Class III A	NIC1786	L4+24H	10	15	0	15	0	1
Class III A	NIC1786	L4+24H	1	12	0	12	0	1
Class III A	NIC1786	L4+24H	2	29	0	29	0	1
Class III A	NIC1786	L4+24H	3	19	0	19	0	1
Class III A	NIC1786	L4+24H	4	29	0	29	0	1
Class III A	NIC1786	L4+24H	5	12	0	12	0	1
Class III A	NIC1786	L4+24H	6	27	0	27	0	1
Class III A	NIC1786	L4+24H	7	7	0	7	0	1
Class III A	NIC1786	L4+24H	8	21	0	21	0	1
Class III A	NIC1786	L4+24H	9	21	0	21	0	1
Class III A	NIC1786	L4+24H	10	19	0	19	0	1
Class III A	NIC1786	L4+24H	1	25	0	25	0	1
Class III A	NIC1786	L4+24H	2	19	0	19	0	1
Class III A	NIC1786	L4+24H	3	13	0	13	0	1
Class III A	NIC1786	L4+24H	4	18	0	18	0	1
Class III A	NIC1786	L4+24H	5	23	0	23	0	1
Class III A	NIC1786	L4+24H	6	17	0	17	0	1
Class III A	NIC1786	L4+24H	7	20	0	20	0	1
Class III A	NIC1786	L4+24H	8	16	0	16	0	1
Class III A	NIC1786	L4+24H	9	15	0	15	0	1
Class III A	NIC1786	L4+24H	10	18	0	18	0	1
Class III A	JU2829	L4+24H	1	32	0	32	0	1
Class III A	JU2829	L4+24H	2	32	0	32	0	1
Class III A	JU2829	L4+24H	3	35	0	35	0	1
Class III A	JU2829	L4+24H	4	40	0	40	0	1
Class III A	JU2829	L4+24H	5	33	0	33	0	1
Class III A	JU2829	L4+24H	6	27	0	27	0	1
Class III A	JU2829	L4+24H	7	27	0	27	0	1
Class III A	JU2829	L4+24H	8	44	0	44	0	1
Class III A	JU2829	L4+24H	9	34	0	34	0	1
Class III A	JU2829	L4+24H	10	39	0	39	0	1
Class III A	JU2829	L4+24H	1	37	0	37	0	1
Class III A	JU2829	L4+24H	2	28	0	28	0	1
Class III A	JU2829	L4+24H	3	28	0	28	0	1
Class III A	JU2829	L4+24H	4	10	0	10	0	1
Class III A	JU2829	L4+24H	5	34	1	35	1	0
Class III A	JU2829	L4+24H	6	34	0	34	0	1
Class III A	JU2829	L4+24H	7	24	0	24	0	1
Class III A	JU2829	L4+24H	8	37	0	37	0	1
Class III A	JU2829	L4+24H	9	27	0	27	0	1
Class III A	JU2829	L4+24H	10	36	0	36	0	1
Class III A	JU2829	L4+24H	1	30	0	30	0	1
Class III A	JU2829	L4+24H	2	17	0	17	0	1
Class III A	JU2829	L4+24H	3	30	0	30	0	1
Class III A	JU2829	L4+24H	4	36	0	36	0	1
Class III A	JU2829	L4+24H	5	20	0	20	0	1
Class III A	JU2829	L4+24H	6	37	0	37	0	1
Class III A	JU2829	L4+24H	7	33	0	33	0	1
Class III A	JU2829	L4+24H	8	35	0	35	0	1
Class III A	JU2829	L4+24H	9	28	0	28	0	1
Class III A	JU2829	L4+24H	10	14	0	14	0	1
Class III B	NIC1832	L4+24H	1	16	0	16	0	1
Class III B	NIC1832	L4+24H	2	32	0	32	0	1
Class III B	NIC1832	L4+24H	3	41	0	41	0	1
Class III B	NIC1832	L4+24H	4	23	0	23	0	1
Class III B	NIC1832	L4+24H	5	24	0	24	0	1
Class III B	NIC1832	L4+24H	6	23	0	23	0	1
Class III B	NIC1832	L4+24H	7	37	0	37	0	1
Class III B	NIC1832	L4+24H	8	30	0	30	0	1
Class III B	NIC1832	L4+24H	9	15	0	15	0	1
Class III B	NIC1832	L4+24H	10	38	0	38	0	1
Class III B	NIC1832	L4+24H	1	21	0	21	0	1
Class III B	NIC1832	L4+24H	2	23	0	23	0	1
Class III B	NIC1832	L4+24H	3	24	0	24	0	1
Class III B	NIC1832	L4+24H	4	31	0	31	0	1
Class III B	NIC1832	L4+24H	5	24	0	24	0	1
Class III B	NIC1832	L4+24H	6	45	0	45	0	1
Class III B	NIC1832	L4+24H	7	23	0	23	0	1
Class III B	NIC1832	L4+24H	8	28	0	28	0	1
Class III B	NIC1832	L4+24H	9	21	0	21	0	1
Class III B	NIC1832	L4+24H	10	24	0	24	0	1
Class III A	NIC1786	L4+48H	1	34	0	34	0	1
Class III A	NIC1786	L4+48H	2	43	0	43	0	1
Class III A	NIC1786	L4+48H	3	31	0	31	0	1
Class III A	NIC1786	L4+48H	4	40	0	40	0	1
Class III A	NIC1786	L4+48H	5	21	0	21	0	1
Class III A	NIC1786	L4+48H	6	20	0	20	0	1
Class III A	NIC1786	L4+48H	7	47	0	47	0	1
Class III A	NIC1786	L4+48H	8	39	0	39	0	1
Class III A	NIC1786	L4+48H	9	54	0	54	0	1
Class III A	NIC1786	L4+48H	10	22	0	22	0	1
Class III A	NIC1786	L4+48H	1	41	0	41	0	1
Class III A	NIC1786	L4+48H	2	44	0	44	0	1
Class III A	NIC1786	L4+48H	3	30	0	30	0	1
Class III A	NIC1786	L4+48H	4	39	0	39	0	1
Class III A	NIC1786	L4+48H	5	34	0	34	0	1
Class III A	NIC1786	L4+48H	6	31	0	31	0	1
Class III A	NIC1786	L4+48H	7	24	0	24	0	1
Class III A	NIC1786	L4+48H	8	26	0	26	0	1
Class III A	NIC1786	L4+48H	9	22	0	22	0	1
Class III A	NIC1786	L4+48H	10	38	0	38	0	1
Class III A	NIC1786	L4+48H	1	32	0	32	0	1
Class III A	NIC1786	L4+48H	2	32	0	32	0	1
Class III A	NIC1786	L4+48H	3	31	0	31	0	1
Class III A	NIC1786	L4+48H	4	24	0	24	0	1
Class III A	NIC1786	L4+48H	5	25	0	25	0	1
Class III A	NIC1786	L4+48H	6	39	0	39	0	1
Class III A	NIC1786	L4+48H	7	35	0	35	0	1
Class III A	NIC1786	L4+48H	8	30	0	30	0	1
Class III A	NIC1786	L4+48H	9	16	0	16	0	1
Class III A	NIC1786	L4+48H	10	48	0	48	0	1
Class III B	NIC1832	L4+48H	1	46	0	46	0	1
Class III B	NIC1832	L4+48H	2	31	2	33	1	0
Class III B	NIC1832	L4+48H	3	37	0	37	0	1
Class III B	NIC1832	L4+48H	4	41	0	41	0	1
Class III B	NIC1832	L4+48H	5	34	1	35	1	0
Class III B	NIC1832	L4+48H	6	34	0	34	0	1
Class III B	NIC1832	L4+48H	7	28	1	29	1	0
Class III B	NIC1832	L4+48H	8	31	0	31	0	1
Class III B	NIC1832	L4+48H	9	45	0	45	0	1
Class III B	NIC1832	L4+48H	1	44	2	46	1	0
Class III B	NIC1832	L4+48H	2	36	0	36	0	1
Class III B	NIC1832	L4+48H	3	15	0	15	0	1
Class III B	NIC1832	L4+48H	4	42	0	42	0	1
Class III B	NIC1832	L4+48H	5	15	4	19	1	0
Class III B	NIC1832	L4+48H	6	25	4	29	1	0
Class III B	NIC1832	L4+48H	7	17	0	17	0	1
Class III B	NIC1832	L4+48H	8	21	1	22	1	0
Class III B	NIC1832	L4+48H	9	16	0	16	0	1
Class III B	NIC1832	L4+48H	10	12	0	12	0	1
Class III B	JU2593	L4+48H	1	12	16	28	1	0
Class III B	JU2593	L4+48H	2	0	29	29	1	0
Class III B	JU2593	L4+48H	3	22	10	32	1	0
Class III B	JU2593	L4+48H	4	12	20	32	1	0
Class III B	JU2593	L4+48H	1	19	15	34	1	0
Class III B	JU2593	L4+48H	2	16	0	16	0	1
Class III B	JU2593	L4+48H	3	24	9	33	1	0
Class III B	JU2593	L4+48H	4	3	18	21	1	0
Class III B	JU2593	L4+48H	5	7	10	17	1	0
Class III B	JU2593	L4+48H	6	7	23	30	1	0
Class III B	JU2593	L4+48H	7	2	20	22	1	0
Class III B	JU2593	L4+48H	8	28	20	48	1	0
Class III B	JU2593	L4+48H	9	3	27	30	1	0
Class III B	JU2593	L4+48H	10	3	9	12	1	0
Class III B	JU2593	L4+48H	1	13	29	42	1	0
Class III B	JU2593	L4+48H	2	4	15	19	1	0
Class III B	JU2593	L4+48H	3	21	19	40	1	0
Class III B	JU2593	L4+48H	4	17	17	34	1	0
Class III B	JU2593	L4+48H	5	12	29	41	1	0
Class III B	JU2593	L4+48H	6	26	18	44	1	0
Class III B	JU2593	L4+48H	7	6	16	22	1	0
Class III B	JU2593	L4+48H	8	36	1	37	1	0
Class III B	JU2593	L4+48H	9	7	20	27	1	0
Class III B	JU2593	L4+48H	10	10	12	22	1	0
Class III B	NIC1832	L4+72H	1	5	3	8	1	0
Class III B	NIC1832	L4+72H	2	4	7	11	1	0
Class III B	NIC1832	L4+72H	3	17	2	19	1	0
Class III B	NIC1832	L4+72H	4	11	0	11	0	1
Class III B	NIC1832	L4+72H	5	11	1	12	1	0
Class III B	NIC1832	L4+72H	6	18	1	19	1	0
Class III B	NIC1832	L4+72H	1	2	2	4	1	0
Class III B	NIC1832	L4+72H	2	13	5	18	1	0
Class III B	NIC1832	L4+72H	3	1	0	1	0	1
Class III B	NIC1832	L4+72H	4	17	1	18	1	0
Class III B	NIC1832	L4+72H	5	11	0	11	0	1
Class III B	NIC1832	L4+72H	6	31	0	31	0	1
Class III A	NIC1786	L4+72H	1	28	0	28	0	1
Class III A	NIC1786	L4+72H	2	2	0	2	0	1
Class III A	NIC1786	L4+72H	3	0	0	0	0	0
Class III A	NIC1786	L4+72H	4	11	0	11	0	1
Class III A	NIC1786	L4+72H	5	20	0	20	0	1
Class III A	NIC1786	L4+72H	6	36	0	36	0	1
Class III A	NIC1786	L4+72H	7	1	0	1	0	1
Class III A	NIC1786	L4+72H	8	0	0	0	0	0
Class III A	NIC1786	L4+72H	9	4	0	4	0	1
Class III A	NIC1786	L4+72H	10	7	0	7	0	1
Class III A	NIC1786	L4+72H	1	0	0	0	0	0
Class III A	NIC1786	L4+72H	2	5	0	5	0	1
Class III A	NIC1786	L4+72H	3	7	0	7	0	1
Class III A	NIC1786	L4+72H	4	3	1	4	1	0
Class III A	NIC1786	L4+72H	5	4	0	4	0	1
Class III A	NIC1786	L4+72H	6	16	0	16	0	1
Class III A	NIC1786	L4+72H	7	11	0	11	0	1
Class III A	NIC1786	L4+72H	8	16	0	16	0	1
Class III A	NIC1786	L4+72H	9	0	0	0	0	0
Class III A	NIC1786	L4+72H	10	13	0	13	0	1
Class III A	NIC1786	L4+72H	1	0	0	0	0	0
Class III A	NIC1786	L4+72H	2	6	0	6	0	1
Class III A	NIC1786	L4+72H	3	13	0	13	0	1
Class III A	NIC1786	L4+72H	4	11	1	12	1	0
Class III A	NIC1786	L4+72H	5	21	0	21	0	1
Class III A	NIC1786	L4+72H	6	25	0	25	0	1
Class III A	NIC1786	L4+72H	7	18	0	18	0	1
Class III A	NIC1786	L4+72H	8	0	0	0	0	0
Class III A	NIC1786	L4+72H	9	15	0	15	0	1
Class III A	NIC1786	L4+72H	10	0	0	0	0	0
Class III B	JU2587	L4+72H	1	0	6	6	1	0
Class III B	JU2587	L4+72H	2	4	2	6	1	0
Class III B	JU2587	L4+72H	3	0	12	12	1	0
Class III B	JU2587	L4+72H	4	3	0	3	0	1
Class III B	JU2587	L4+72H	5	0	6	6	1	0
Class III B	JU2587	L4+72H	6	0	10	10	1	0
Class III B	JU2587	L4+72H	7	0	6	6	1	0
Class III B	JU2587	L4+72H	8	0	1	1	1	0
Class III B	JU2587	L4+72H	9	0	4	4	1	0
Class III B	JU2587	L4+72H	1	7	8	15	1	0
Class III B	JU2587	L4+72H	2	4	5	9	1	0
Class III B	JU2587	L4+72H	3	0	4	4	1	0
Class III B	JU2587	L4+72H	4	2	0	2	0	1
Class III B	JU2587	L4+72H	5	0	6	6	1	0
Class III B	JU2587	L4+72H	6	0	0	0	0	0
Class III B	JU2587	L4+72H	7	0	1	1	1	0
Class III B	JU2587	L4+72H	8	0	3	3	1	0
Class III B	JU2587	L4+72H	9	0	0	0	0	0
Class III B	JU2587	L4+72H	10	0	0	0	0	0
Class III B	JU2587	L4+72H	1	0	0	0	0	0
Class III B	JU2587	L4+72H	2	0	5	5	1	0
Class III B	JU2587	L4+72H	3	0	12	12	1	0
Class III B	JU2587	L4+72H	4	3	2	5	1	0
Class III B	JU2587	L4+72H	5	0	5	5	1	0
Class III B	JU2587	L4+72H	6	0	3	3	1	0
Class III B	JU2587	L4+72H	7	0	1	1	1	0
Class III B	JU2587	L4+72H	8	0	0	0	0	0
Class III B	JU2587	L4+72H	9	0	3	3	1	0
Class III B	JU2587	L4+72H	10	0	8	8	1	0
Class III B	JU751	L4+24H	1	51	0	51	0	1
Class III B	JU751	L4+24H	2	67	0	67	0	1
Class III B	JU751	L4+24H	3	49	0	49	0	1
Class III B	JU751	L4+24H	4	59	0	59	0	1
Class III B	JU751	L4+24H	5	45	0	45	0	1
Class III B	JU751	L4+24H	6	47	0	47	0	1
Class III B	JU751	L4+24H	7	69	1	70	1	0
Class III B	JU751	L4+24H	8	56	0	56	0	1
Class III B	JU751	L4+24H	9	47	0	47	0	1
Class III B	JU751	L4+24H	10	47	0	47	0	1
Class III B	JU751	L4+24H	1	46	0	46	0	1
Class III B	JU751	L4+24H	2	48	0	48	0	1
Class III B	JU751	L4+24H	3	31	0	31	0	1
Class III B	JU751	L4+24H	4	40	0	40	0	1
Class III B	JU751	L4+24H	5	49	0	49	0	1
Class III B	JU751	L4+24H	6	13	0	13	0	1
Class III B	JU751	L4+24H	7	51	0	51	0	1
Class III B	JU751	L4+24H	8	61	0	61	0	1
Class III B	JU751	L4+24H	9	45	0	45	0	1
Class III B	JU751	L4+24H	10	38	0	38	0	1
Class III B	JU751	L4+24H	1	64	0	64	0	1
Class III B	JU751	L4+24H	2	55	0	55	0	1
Class III B	JU751	L4+24H	3	52	0	52	0	1
Class III B	JU751	L4+24H	4	50	0	50	0	1
Class III B	JU751	L4+24H	5	66	0	66	0	1
Class III B	JU751	L4+24H	6	45	0	45	0	1
Class III B	JU751	L4+24H	7	37	0	37	0	1
Class III B	JU751	L4+24H	8	26	0	26	0	1
Class III B	JU751	L4+24H	9	48	0	48	0	1
Class III B	JU751	L4+24H	10	48	0	48	0	1
Class II	CB4856	L4+24H	1	11	0	11	0	1
Class II	CB4856	L4+24H	2	11	0	11	0	1
Class II	CB4856	L4+24H	3	10	0	10	0	1
Class II	CB4856	L4+24H	4	11	0	11	0	1
Class II	CB4856	L4+24H	5	13	0	13	0	1
Class II	CB4856	L4+24H	6	10	0	10	0	1
Class II	CB4856	L4+24H	7	9	0	9	0	1
Class II	CB4856	L4+24H	8	7	0	7	0	1
Class II	CB4856	L4+24H	9	0	0	0	0	0
Class II	CB4856	L4+24H	10	0	0	0	0	0
Class II	CB4856	L4+24H	1	17	0	17	0	1
Class II	CB4856	L4+24H	2	10	0	10	0	1
Class II	CB4856	L4+24H	3	10	0	10	0	1
Class II	CB4856	L4+24H	4	11	0	11	0	1
Class II	CB4856	L4+24H	5	5	0	5	0	1
Class II	CB4856	L4+24H	6	7	0	7	0	1
Class II	CB4856	L4+24H	7	21	0	21	0	1
Class II	CB4856	L4+24H	8	11	0	11	0	1
Class II	CB4856	L4+24H	9	13	0	13	0	1
Class II	CB4856	L4+24H	10	10	0	10	0	1
Class II	CB4856	L4+24H	1	14	0	14	0	1
Class II	CB4856	L4+24H	2	12	0	12	0	1
Class II	CB4856	L4+24H	3	8	0	8	0	1
Class II	CB4856	L4+24H	4	9	0	9	0	1
Class II	CB4856	L4+24H	5	10	0	10	0	1
Class II	CB4856	L4+24H	6	14	0	14	0	1
Class II	CB4856	L4+24H	7	9	0	9	0	1
Class II	CB4856	L4+24H	8	8	0	8	0	1
Class II	CB4856	L4+24H	9	9	0	9	0	1
Class II	CB4856	L4+24H	10	11	0	11	0	1
Class III A	JU440	L4+24H	1	25	0	25	0	1
Class III A	JU440	L4+24H	2	33	0	33	0	1
Class III A	JU440	L4+24H	3	21	0	21	0	1
Class III A	JU440	L4+24H	4	29	0	29	0	1
Class III A	JU440	L4+24H	5	27	0	27	0	1
Class III A	JU440	L4+24H	6	25	0	25	0	1
Class III A	JU440	L4+24H	7	27	0	27	0	1
Class III A	JU440	L4+24H	8	36	0	36	0	1
Class III A	JU440	L4+24H	9	28	0	28	0	1
Class III A	JU440	L4+24H	10	22	0	22	0	1
Class III A	JU440	L4+24H	1	20	0	20	0	1
Class III A	JU440	L4+24H	2	28	0	28	0	1
Class III A	JU440	L4+24H	3	40	0	40	0	1
Class III A	JU440	L4+24H	4	22	0	22	0	1
Class III A	JU440	L4+24H	5	15	0	15	0	1
Class III A	JU440	L4+24H	6	23	0	23	0	1
Class III A	JU440	L4+24H	7	27	0	27	0	1
Class III A	JU440	L4+24H	8	19	0	19	0	1
Class III A	JU440	L4+24H	9	22	0	22	0	1
Class III A	JU440	L4+24H	10	21	0	21	0	1
Class III A	JU440	L4+24H	1	16	0	16	0	1
Class III A	JU440	L4+24H	2	17	0	17	0	1
Class III A	JU440	L4+24H	3	20	0	20	0	1
Class III A	JU440	L4+24H	4	31	0	31	0	1
Class III A	JU440	L4+24H	5	21	0	21	0	1
Class III A	JU440	L4+24H	6	23	0	23	0	1
Class III A	JU440	L4+24H	7	15	0	15	0	1
Class III A	JU440	L4+24H	8	25	0	25	0	1
Class III A	JU440	L4+24H	9	12	0	12	0	1
Class III A	JU440	L4+24H	10	18	0	18	0	1
Class II	JU1200	L4+48H	1	15	0	15	0	1
Class II	JU1200	L4+48H	2	8	0	8	0	1
Class II	JU1200	L4+48H	3	10	0	10	0	1
Class II	JU1200	L4+48H	4	8	0	8	0	1
Class II	JU1200	L4+48H	5	18	0	18	0	1
Class II	JU1200	L4+48H	6	11	0	11	0	1
Class II	JU1200	L4+48H	7	17	0	17	0	1
Class II	JU1200	L4+48H	8	3	0	3	0	1
Class II	JU1200	L4+48H	9	4	0	4	0	1
Class II	JU1200	L4+48H	10	21	0	21	0	1
Class II	JU1200	L4+48H	1	18	0	18	0	1
Class II	JU1200	L4+48H	2	20	0	20	0	1
Class II	JU1200	L4+48H	3	12	0	12	0	1
Class II	JU1200	L4+48H	4	14	0	14	0	1
Class II	JU1200	L4+48H	5	11	0	11	0	1
Class II	JU1200	L4+48H	6	12	0	12	0	1
Class II	JU1200	L4+48H	7	13	0	13	0	1
Class II	JU1200	L4+48H	8	9	0	9	0	1
Class II	JU1200	L4+48H	9	6	0	6	0	1
Class II	JU1200	L4+48H	10	19	0	19	0	1
Class II	JU1200	L4+48H	1	9	0	9	0	1
Class II	JU1200	L4+48H	2	20	0	20	0	1
Class II	JU1200	L4+48H	3	11	0	11	0	1
Class II	JU1200	L4+48H	4	5	0	5	0	1
Class II	JU1200	L4+48H	5	17	0	17	0	1
Class II	JU1200	L4+48H	6	13	0	13	0	1
Class II	JU1200	L4+48H	7	4	0	4	0	1
Class II	JU1200	L4+48H	8	16	0	16	0	1
Class II	JU1200	L4+48H	9	14	0	14	0	1
Class II	JU1200	L4+48H	10	12	0	12	0	1
Class III B	JU751	L4+48H	1	49	6	55	1	0
Class III B	JU751	L4+48H	2	53	2	55	1	0
Class III B	JU751	L4+48H	3	45	9	54	1	0
Class III B	JU751	L4+48H	4	49	3	52	1	0
Class III B	JU751	L4+48H	5	26	11	37	1	0
Class III B	JU751	L4+48H	6	35	4	39	1	0
Class III B	JU751	L4+48H	7	54	0	54	0	1
Class III B	JU751	L4+48H	8	38	2	40	1	0
Class III B	JU751	L4+48H	9	31	3	34	1	0
Class III B	JU751	L4+48H	10	34	0	34	0	1
Class III B	JU751	L4+48H	1	46	8	54	1	0
Class III B	JU751	L4+48H	2	53	4	57	1	0
Class III B	JU751	L4+48H	3	81	3	84	1	0
Class III B	JU751	L4+48H	4	30	6	36	1	0
Class III B	JU751	L4+48H	5	63	2	65	1	0
Class III B	JU751	L4+48H	6	72	3	75	1	0
Class III B	JU751	L4+48H	7	37	3	40	1	0
Class III B	JU751	L4+48H	8	50	2	52	1	0
Class III B	JU751	L4+48H	9	52	4	56	1	0
Class III B	JU751	L4+48H	10	33	0	33	0	1
Class III B	JU751	L4+48H	1	50	0	50	0	1
Class III B	JU751	L4+48H	2	28	3	31	1	0
Class III B	JU751	L4+48H	3	61	0	61	0	1
Class III B	JU751	L4+48H	4	49	3	52	1	0
Class III B	JU751	L4+48H	5	43	10	53	1	0
Class III B	JU751	L4+48H	6	52	13	65	1	0
Class III B	JU751	L4+48H	7	55	2	57	1	0
Class III B	JU751	L4+48H	8	59	2	61	1	0
Class III B	JU751	L4+48H	9	37	0	37	0	1
Class III B	JU751	L4+48H	10	20	0	20	0	1
Class I	QG2873	L4+48H	1	7	0	7	0	1
Class I	QG2873	L4+48H	2	7	0	7	0	1
Class I	QG2873	L4+48H	3	3	0	3	0	1
Class I	QG2873	L4+48H	4	6	0	6	0	1
Class I	QG2873	L4+48H	5	8	0	8	0	1
Class I	QG2873	L4+48H	6	6	0	6	0	1
Class I	QG2873	L4+48H	7	4	0	4	0	1
Class I	QG2873	L4+48H	8	4	0	4	0	1
Class I	QG2873	L4+48H	9	4	0	4	0	1
Class I	QG2873	L4+48H	10	5	0	5	0	1
Class I	QG2873	L4+48H	1	6	0	6	0	1
Class I	QG2873	L4+48H	2	2	0	2	0	1
Class I	QG2873	L4+48H	3	5	0	5	0	1
Class I	QG2873	L4+48H	4	8	0	8	0	1
Class I	QG2873	L4+48H	5	5	0	5	0	1
Class I	QG2873	L4+48H	6	3	0	3	0	1
Class I	QG2873	L4+48H	7	2	0	2	0	1
Class I	QG2873	L4+48H	8	7	0	7	0	1
Class I	QG2873	L4+48H	9	3	0	3	0	1
Class I	QG2873	L4+48H	1	4	0	4	0	1
Class I	QG2873	L4+48H	2	4	0	4	0	1
Class I	QG2873	L4+48H	3	4	0	4	0	1
Class I	QG2873	L4+48H	4	6	0	6	0	1
Class I	QG2873	L4+48H	5	5	0	5	0	1
Class I	QG2873	L4+48H	6	2	0	2	0	1
Class I	QG2873	L4+48H	7	6	0	6	0	1
Class I	QG2873	L4+48H	8	4	0	4	0	1
Class I	QG2873	L4+48H	9	5	0	5	0	1
Class I	QG2873	L4+48H	10	6	0	6	0	1
Class III B	JU751	L4+72H	1	35	0	35	0	1
Class III B	JU751	L4+72H	2	13	1	14	1	0
Class III B	JU751	L4+72H	3	3	0	3	0	1
Class III B	JU751	L4+72H	4	4	0	4	0	1
Class III B	JU751	L4+72H	5	10	0	10	0	1
Class III B	JU751	L4+72H	6	0	6	6	1	0
Class III B	JU751	L4+72H	7	2	2	4	1	0
Class III B	JU751	L4+72H	8	3	4	7	1	0
Class III B	JU751	L4+72H	9	2	13	15	1	0
Class III B	JU751	L4+72H	10	0	5	5	1	0
Class III B	JU751	L4+72H	1	7	6	13	1	0
Class III B	JU751	L4+72H	2	0	4	4	1	0
Class III B	JU751	L4+72H	3	0	7	7	1	0
Class III B	JU751	L4+72H	4	0	2	2	1	0
Class III B	JU751	L4+72H	5	0	5	5	1	0
Class III B	JU751	L4+72H	6	0	3	3	1	0
Class III B	JU751	L4+72H	7	0	8	8	1	0
Class III B	JU751	L4+72H	8	0	8	8	1	0
Class III B	JU751	L4+72H	9	0	4	4	1	0
Class III B	JU751	L4+72H	10	0	9	9	1	0
Class III B	JU751	L4+72H	11	0	6	6	1	0
Class III B	JU751	L4+72H	12	2	2	4	1	0
Class III B	JU751	L4+72H	13	29	2	31	1	0
Class III B	JU751	L4+72H	14	2	13	15	1	0
Class III B	JU751	L4+72H	1	0	0	0	0	0
Class III B	JU751	L4+72H	2	0	2	2	1	0
Class III B	JU751	L4+72H	3	2	6	8	1	0
Class III B	JU751	L4+72H	4	0	6	6	1	0
Class III B	JU751	L4+72H	5	2	0	2	0	1
Class III B	JU751	L4+72H	6	0	0	0	0	0
Class III B	JU751	L4+72H	7	2	0	2	0	1
Class III B	JU751	L4+72H	8	14	0	14	0	1
Class III B	JU751	L4+72H	9	1	4	5	1	0
Class III B	JU751	L4+72H	10	3	3	6	1	0
Class II	JU1200	L4+72H	1	0	0	0	0	0
Class II	JU1200	L4+72H	2	0	0	0	0	0
Class II	JU1200	L4+72H	3	3	0	3	0	1
Class II	JU1200	L4+72H	4	1	3	4	1	0
Class II	JU1200	L4+72H	5	2	0	2	0	1
Class II	JU1200	L4+72H	6	0	0	0	0	0
Class II	JU1200	L4+72H	7	0	0	0	0	0
Class II	JU1200	L4+72H	8	0	0	0	0	0
Class II	JU1200	L4+72H	9	0	0	0	0	0
Class II	JU1200	L4+72H	10	1	0	1	0	1
Class II	JU1200	L4+72H	1	0	0	0	0	0
Class II	JU1200	L4+72H	2	0	0	0	0	0
Class II	JU1200	L4+72H	3	0	0	0	0	0
Class II	JU1200	L4+72H	4	0	0	0	0	0
Class II	JU1200	L4+72H	5	0	0	0	0	0
Class II	JU1200	L4+72H	6	0	0	0	0	0
Class II	JU1200	L4+72H	7	0	0	0	0	0
Class II	JU1200	L4+72H	8	0	0	0	0	0
Class II	JU1200	L4+72H	9	0	0	0	0	0
Class II	JU1200	L4+72H	10	8	0	8	0	1
Class II	JU1200	L4+72H	1	0	0	0	0	0
Class II	JU1200	L4+72H	2	0	0	0	0	0
Class II	JU1200	L4+72H	3	1	0	1	0	1
Class II	JU1200	L4+72H	4	3	0	3	0	1
Class II	JU1200	L4+72H	5	0	0	0	0	0
Class II	JU1200	L4+72H	6	1	0	1	0	1
Class II	JU1200	L4+72H	7	1	0	1	0	1
Class II	JU1200	L4+72H	8	0	0	0	0	0
Class II	JU1200	L4+72H	9	3	0	3	0	1
Class II	JU1200	L4+72H	10	0	0	0	0	0
Class I	JU3166	L4+72H	1	0	0	0	0	0
Class I	JU3166	L4+72H	2	0	0	0	0	0
Class I	JU3166	L4+72H	3	0	0	0	0	0
Class I	JU3166	L4+72H	4	0	0	0	0	0
Class I	JU3166	L4+72H	5	0	0	0	0	0
Class I	JU3166	L4+72H	6	0	0	0	0	0
Class I	JU3166	L4+72H	7	0	0	0	0	0
Class I	JU3166	L4+72H	8	0	0	0	0	0
Class I	JU3166	L4+72H	9	0	0	0	0	0
Class I	JU3166	L4+72H	10	0	0	0	0	0
Class I	JU3166	L4+72H	1	1	0	1	0	1
Class I	JU3166	L4+72H	2	0	0	0	0	0
Class I	JU3166	L4+72H	3	0	0	0	0	0
Class I	JU3166	L4+72H	4	0	0	0	0	0
Class I	JU3166	L4+72H	5	0	0	0	0	0
Class I	JU3166	L4+72H	6	0	0	0	0	0
Class I	JU3166	L4+72H	7	0	0	0	0	0
Class I	JU3166	L4+72H	8	0	0	0	0	0
Class I	JU3166	L4+72H	9	3	0	3	0	1
Class I	JU3166	L4+72H	10	0	0	0	0	0
Class I	JU3166	L4+72H	1	0	0	0	0	0
Class I	JU3166	L4+72H	2	0	0	0	0	0
Class I	JU3166	L4+72H	3	0	0	0	0	0
Class I	JU3166	L4+72H	4	0	0	0	0	0
Class I	JU3166	L4+72H	5	0	0	0	0	0
Class I	JU3166	L4+72H	6	0	0	0	0	0
Class I	JU3166	L4+72H	7	0	0	0	0	0
Class I	JU3166	L4+72H	8	0	0	0	0	0
Class I	JU3166	L4+72H	9	0	0	0	0	0
Class I	JU3166	L4+72H	10	0	0	0	0	0
Class II	N2	L4+48H	1	21	0	21	0	1
Class II	N2	L4+48H	2	22	0	22	0	1
Class II	N2	L4+48H	3	30	0	30	0	1
Class II	N2	L4+48H	4	27	0	27	0	1
Class II	N2	L4+48H	5	27	0	27	0	1
Class II	N2	L4+48H	6	24	0	24	0	1
Class II	N2	L4+48H	7	28	0	28	0	1
Class II	N2	L4+48H	8	27	0	27	0	1
Class II	N2	L4+48H	9	20	0	20	0	1
Class II	N2	L4+48H	10	22	0	22	0	1
Class II	N2	L4+48H	1	27	0	27	0	1
Class II	N2	L4+48H	2	28	0	28	0	1
Class II	N2	L4+48H	3	30	0	30	0	1
Class II	N2	L4+48H	4	15	0	15	0	1
Class II	N2	L4+48H	5	27	0	27	0	1
Class II	N2	L4+48H	6	33	0	33	0	1
Class II	N2	L4+48H	7	13	0	13	0	1
Class II	N2	L4+48H	8	22	0	22	0	1
Class II	N2	L4+48H	9	14	0	14	0	1
Class II	N2	L4+48H	10	10	0	10	0	1
Class II	N2	L4+48H	1	32	0	32	0	1
Class II	N2	L4+48H	2	22	0	22	0	1
Class II	N2	L4+48H	3	20	0	20	0	1
Class II	N2	L4+48H	4	21	0	21	0	1
Class II	N2	L4+48H	5	21	0	21	0	1
Class II	N2	L4+48H	6	11	0	11	0	1
Class II	N2	L4+48H	7	16	0	16	0	1
Class II	N2	L4+48H	8	24	0	24	0	1
Class II	N2	L4+48H	9	28	0	28	0	1
Class II	N2	L4+48H	10	12	0	12	0	1
Class III A	JU2829	L4+48H	1	23	1	24	1	0
Class III A	JU2829	L4+48H	2	30	0	30	0	1
Class III A	JU2829	L4+48H	3	3	0	3	0	1
Class III A	JU2829	L4+48H	4	33	0	33	0	1
Class III A	JU2829	L4+48H	5	23	0	23	0	1
Class III A	JU2829	L4+48H	6	20	0	20	0	1
Class III A	JU2829	L4+48H	7	15	0	15	0	1
Class III A	JU2829	L4+48H	8	19	0	19	0	1
Class III A	JU2829	L4+48H	9	60	1	61	1	0
Class III A	JU2829	L4+48H	10	28	0	28	0	1
Class III A	JU2829	L4+48H	1	21	0	21	0	1
Class III A	JU2829	L4+48H	2	20	0	20	0	1
Class III A	JU2829	L4+48H	3	29	1	30	1	0
Class III A	JU2829	L4+48H	4	20	0	20	0	1
Class III A	JU2829	L4+48H	5	22	0	22	0	1
Class III A	JU2829	L4+48H	6	50	0	50	0	1
Class III A	JU2829	L4+48H	7	9	0	9	0	1
Class III A	JU2829	L4+48H	8	25	0	25	0	1
Class III A	JU2829	L4+48H	9	40	0	40	0	1
Class III A	JU2829	L4+48H	10	37	0	37	0	1
Class III A	JU2829	L4+48H	1	25	0	25	0	1
Class III A	JU2829	L4+48H	2	55	1	56	1	0
Class III A	JU2829	L4+48H	3	43	3	46	1	0
Class III A	JU2829	L4+48H	4	28	8	36	1	0
Class III A	JU2829	L4+48H	5	17	0	17	0	1
Class III A	JU2829	L4+48H	6	32	0	32	0	1
Class III A	JU2829	L4+48H	7	4	3	7	1	0
Class III A	JU2829	L4+48H	8	11	0	11	0	1
Class III A	JU2829	L4+48H	9	61	0	61	0	1
Class III A	JU2829	L4+48H	10	38	0	38	0	1
Class II	N2	L4+24H	1	15	0	15	0	1
Class II	N2	L4+24H	2	16	0	16	0	1
Class II	N2	L4+24H	3	13	0	13	0	1
Class II	N2	L4+24H	4	16	0	16	0	1
Class II	N2	L4+24H	5	13	0	13	0	1
Class II	N2	L4+24H	6	14	0	14	0	1
Class II	N2	L4+24H	7	17	0	17	0	1
Class II	N2	L4+24H	8	12	0	12	0	1
Class II	N2	L4+24H	9	15	0	15	0	1
Class II	N2	L4+24H	10	15	0	15	0	1
Class II	N2	L4+24H	1	13	0	13	0	1
Class II	N2	L4+24H	2	15	0	15	0	1
Class II	N2	L4+24H	3	7	0	7	0	1
Class II	N2	L4+24H	4	13	0	13	0	1
Class II	N2	L4+24H	5	14	0	14	0	1
Class II	N2	L4+24H	6	10	0	10	0	1
Class II	N2	L4+24H	7	18	0	18	0	1
Class II	N2	L4+24H	8	11	0	11	0	1
Class II	N2	L4+24H	9	12	0	12	0	1
Class II	N2	L4+24H	10	15	0	15	0	1
Class II	N2	L4+24H	1	6	0	6	0	1
Class II	N2	L4+24H	2	10	0	10	0	1
Class II	N2	L4+24H	3	11	0	11	0	1
Class II	N2	L4+24H	4	15	0	15	0	1
Class II	N2	L4+24H	5	4	0	4	0	1
Class II	N2	L4+24H	6	9	0	9	0	1
Class II	N2	L4+24H	7	11	0	11	0	1
Class II	N2	L4+24H	8	12	0	12	0	1
Class II	N2	L4+24H	9	13	0	13	0	1
Class II	N2	L4+24H	10		0	0	0	0
Class III B	NIC1832	L4+24H	1	7	0	7	0	1
Class III B	NIC1832	L4+24H	2	24	0	24	0	1
Class III B	NIC1832	L4+24H	3	28	0	28	0	1
Class III B	NIC1832	L4+24H	4	20	0	20	0	1
Class III B	NIC1832	L4+24H	5	21	0	21	0	1
Class III B	NIC1832	L4+24H	6	26	0	26	0	1
Class III B	NIC1832	L4+24H	7	19	0	19	0	1
Class III B	NIC1832	L4+24H	8	28	0	28	0	1
Class III B	NIC1832	L4+24H	9	21	0	21	0	1
Class III B	NIC1832	L4+24H	10	29	0	29	0	1
Class III B	NIC1832	L4+24H	1	40	1	41	1	0
Class III B	NIC1832	L4+24H	2	21	0	21	0	1
Class III B	NIC1832	L4+24H	3	31	0	31	0	1
Class III B	NIC1832	L4+24H	4	28	0	28	0	1
Class III B	NIC1832	L4+24H	5	8	0	8	0	1
Class III B	NIC1832	L4+24H	6	20	0	20	0	1
Class III B	NIC1832	L4+24H	7	25	0	25	0	1
Class III B	NIC1832	L4+24H	8	28	0	28	0	1
Class III B	NIC1832	L4+24H	9	29	0	29	0	1
Class III B	NIC1832	L4+24H	10	28	0	28	0	1
Class III B	NIC1832	L4+24H	1	16	0	16	0	1
Class III B	NIC1832	L4+24H	2	23	0	23	0	1
Class III B	NIC1832	L4+24H	3	36	0	36	0	1
Class III B	NIC1832	L4+24H	4	23	0	23	0	1
Class III B	NIC1832	L4+24H	5	16	0	16	0	1
Class III B	NIC1832	L4+24H	6	21	0	21	0	1
Class III B	NIC1832	L4+24H	7	30	0	30	0	1
Class III B	NIC1832	L4+24H	8	27	0	27	0	1
Class III B	NIC1832	L4+24H	9	37	0	37	0	1
Class III B	NIC1832	L4+24H	10	14	0	14	0	1
Class II	N2	L4+48H	1	15	0	15	0	1
Class II	N2	L4+48H	2	20	0	20	0	1
Class II	N2	L4+48H	3	13	0	13	0	1
Class II	N2	L4+48H	4	17	0	17	0	1
Class II	N2	L4+48H	5	13	0	13	0	1
Class II	N2	L4+48H	6	14	0	14	0	1
Class II	N2	L4+48H	7	19	0	19	0	1
Class II	N2	L4+48H	8	14	0	14	0	1
Class II	N2	L4+48H	9	20	0	20	0	1
Class II	N2	L4+48H	10	17	0	17	0	1
Class II	N2	L4+48H	1	15	0	15	0	1
Class II	N2	L4+48H	2	16	0	16	0	1
Class II	N2	L4+48H	3	15	0	15	0	1
Class II	N2	L4+48H	4	20	0	20	0	1
Class II	N2	L4+48H	5	17	0	17	0	1
Class II	N2	L4+48H	6	16	0	16	0	1
Class II	N2	L4+48H	7	21	0	21	0	1
Class II	N2	L4+48H	8	25	0	25	0	1
Class II	N2	L4+48H	9	13	0	13	0	1
Class II	N2	L4+48H	10	19	0	19	0	1
Class II	N2	L4+48H	1	14	0	14	0	1
Class II	N2	L4+48H	2	10	0	10	0	1
Class II	N2	L4+48H	3	15	0	15	0	1
Class II	N2	L4+48H	4	21	0	21	0	1
Class II	N2	L4+48H	5	18	0	18	0	1
Class II	N2	L4+48H	6	12	0	12	0	1
Class II	N2	L4+48H	7	13	0	13	0	1
Class II	N2	L4+48H	8	23	0	23	0	1
Class II	N2	L4+48H	9	6	0	6	0	1
Class II	N2	L4+48H	10	22	0	22	0	1
Class III B	NIC1832	L4+48H	1	5	1	6	1	0
Class III B	NIC1832	L4+48H	2	23	0	23	0	1
Class III B	NIC1832	L4+48H	3	20	0	20	0	1
Class III B	NIC1832	L4+48H	4	32	0	32	0	1
Class III B	NIC1832	L4+48H	5	11	6	17	1	0
Class III B	NIC1832	L4+48H	6	14	2	16	1	0
Class III B	NIC1832	L4+48H	7	3	0	3	0	1
Class III B	NIC1832	L4+48H	8	23	0	23	0	1
Class III B	NIC1832	L4+48H	9	24	3	27	1	0
Class III B	NIC1832	L4+48H	10	18	0	18	0	1
Class III B	NIC1832	L4+48H	1	33	1	34	1	0
Class III B	NIC1832	L4+48H	2	20	9	29	1	0
Class III B	NIC1832	L4+48H	3	0	2	2	1	0
Class III B	NIC1832	L4+48H	4	4	3	7	1	0
Class III B	NIC1832	L4+48H	5	44	1	45	1	0
Class III B	NIC1832	L4+48H	6	9	0	9	0	1
Class III B	NIC1832	L4+48H	7	7	1	8	1	0
Class III B	NIC1832	L4+48H	8	2	4	6	1	0
Class III B	NIC1832	L4+48H	9	20	0	20	0	1
Class III B	NIC1832	L4+48H	10	7	4	11	1	0
Class III B	NIC1832	L4+48H	1	12	0	12	0	1
Class III B	NIC1832	L4+48H	2	22	0	22	0	1
Class III B	NIC1832	L4+48H	3	10	0	10	0	1
Class III B	NIC1832	L4+48H	4	4	6	10	1	0
Class III B	NIC1832	L4+48H	5	5	0	5	0	1
Class III B	NIC1832	L4+48H	6	12	0	12	0	1
Class III B	NIC1832	L4+48H	7	0	7	7	1	0
Class III B	NIC1832	L4+48H	8	14	0	14	0	1
Class III B	NIC1832	L4+48H	9	32	0	32	0	1
Class III B	NIC1832	L4+48H	10	12	0	12	0	1
Class II	N2	L4+72H	1	3	0	3	0	1
Class II	N2	L4+72H	2	4	0	4	0	1
Class II	N2	L4+72H	3	8	0	8	0	1
Class II	N2	L4+72H	4	4	0	4	0	1
Class II	N2	L4+72H	5	1	0	1	0	1
Class II	N2	L4+72H	6	3	0	3	0	1
Class II	N2	L4+72H	7	3	0	3	0	1
Class II	N2	L4+72H	8	1	0	1	0	1
Class II	N2	L4+72H	9	3	0	3	0	1
Class II	N2	L4+72H	10	0	0	0	0	0
Class II	N2	L4+72H	1	2	0	2	0	1
Class II	N2	L4+72H	2	1	0	1	0	1
Class II	N2	L4+72H	3	4	0	4	0	1
Class II	N2	L4+72H	4	3	0	3	0	1
Class II	N2	L4+72H	5	0	0	0	0	0
Class II	N2	L4+72H	6	3	0	3	0	1
Class II	N2	L4+72H	7	2	0	2	0	1
Class II	N2	L4+72H	8	1	0	1	0	1
Class II	N2	L4+72H	9	1	1	2	1	0
Class II	N2	L4+72H	10		0	0	0	0
Class II	N2	L4+72H	1	5	0	5	0	1
Class II	N2	L4+72H	2	13	0	13	0	1
Class II	N2	L4+72H	3	3	0	3	0	1
Class II	N2	L4+72H	4	3	0	3	0	1
Class II	N2	L4+72H	5	31	0	31	0	1
Class II	N2	L4+72H	6	1	0	1	0	1
Class II	N2	L4+72H	7	1	0	1	0	1
Class II	N2	L4+72H	8	2	0	2	0	1
Class II	N2	L4+72H	9	0	0	0	0	0
Class II	N2	L4+72H	10	2	0	2	0	1
Class III B	NIC1832	L4+72H	1	0	0	0	0	0
Class III B	NIC1832	L4+72H	2	1	0	1	0	1
Class III B	NIC1832	L4+72H	3	2	1	3	1	0
Class III B	NIC1832	L4+72H	4	4	2	6	1	0
Class III B	NIC1832	L4+72H	5	0	0	0	0	0
Class III B	NIC1832	L4+72H	6	0	2	2	1	0
Class III B	NIC1832	L4+72H	7	1	1	2	1	0
Class III B	NIC1832	L4+72H	8	4	2	6	1	0
Class III B	NIC1832	L4+72H	9	0	5	5	1	0
Class III B	NIC1832	L4+72H	10		0	0	0	0
Class III B	NIC1832	L4+72H	1	3	0	3	0	1
Class III B	NIC1832	L4+72H	2	2	1	3	1	0
Class III B	NIC1832	L4+72H	3	0	1	1	1	0
Class III B	NIC1832	L4+72H	4	0	0	0	0	0
Class III B	NIC1832	L4+72H	5	1	1	2	1	0
Class III B	NIC1832	L4+72H	6	0	3	3	1	0
Class III B	NIC1832	L4+72H	7	0	0	0	0	0
Class III B	NIC1832	L4+72H	8	0	1	1	1	0
Class III B	NIC1832	L4+72H	9	0	0	0	0	0
Class III B	NIC1832	L4+72H	10		0	0	0	0
Class III B	NIC1832	L4+72H	1	3	0	3	0	1
Class III B	NIC1832	L4+72H	2	34	0	34	0	1
Class III B	NIC1832	L4+72H	3	0	0	0	0	0
Class III B	NIC1832	L4+72H	4	7	0	7	0	1
Class III B	NIC1832	L4+72H	5	0	0	0	0	0
Class III B	NIC1832	L4+72H	6	0	0	0	0	0
Class III B	NIC1832	L4+72H	7		2	2	1	0
Class III B	NIC1832	L4+72H	8	9	1	10	1	0
Class III B	NIC1832	L4+72H	9	2	0	2	0	1
Class III B	NIC1832	L4+72H	10	2	2	4	1	0
Class III B	JU2593	L4+24H	1	36	0	36	0	1
Class III B	JU2593	L4+24H	2	43	0	43	0	1
Class III B	JU2593	L4+24H	3	52	0	52	0	1
Class III B	JU2593	L4+24H	4	47	0	47	0	1
Class III B	JU2593	L4+24H	5	45	0	45	0	1
Class III B	JU2593	L4+24H	6	39	0	39	0	1
Class III B	JU2593	L4+24H	7	41	0	41	0	1
Class III B	JU2593	L4+24H	8	40	0	40	0	1
Class III B	JU2593	L4+24H	9	57	0	57	0	1
Class III B	JU2593	L4+24H	10	32	0	32	0	1
Class III B	JU2593	L4+24H	1	42	0	42	0	1
Class III B	JU2593	L4+24H	2	50	0	50	0	1
Class III B	JU2593	L4+24H	3	42	0	42	0	1
Class III B	JU2593	L4+24H	4	40	0	40	0	1
Class III B	JU2593	L4+24H	5	46	0	46	0	1
Class III B	JU2593	L4+24H	6	41	3	44	1	0
Class III B	JU2593	L4+24H	7	45	0	45	0	1
Class III B	JU2593	L4+24H	8	37	2	39	1	0
Class III B	JU2593	L4+24H	9	51	1	52	1	0
Class III B	JU2593	L4+24H	10	33	2	35	1	0
Class III B	JU2593	L4+24H	1	46	0	46	0	1
Class III B	JU2593	L4+24H	2	39	0	39	0	1
Class III B	JU2593	L4+24H	3	48	0	48	0	1
Class III B	JU2593	L4+24H	4	52	0	52	0	1
Class III B	JU2593	L4+24H	5	43	0	43	0	1
Class III B	JU2593	L4+24H	6	30	0	30	0	1
Class III B	JU2593	L4+24H	7	43	0	43	0	1
Class III B	JU2593	L4+24H	8	56	1	57	1	0
Class III B	JU2593	L4+24H	9	48	0	48	0	1
Class III B	JU2593	L4+24H	10	46	0	46	0	1
Class I	JU3166	L4+24H	1	8	0	8	0	1
Class I	JU3166	L4+24H	2	11	0	11	0	1
Class I	JU3166	L4+24H	3	8	0	8	0	1
Class I	JU3166	L4+24H	4	13	0	13	0	1
Class I	JU3166	L4+24H	5	8	0	8	0	1
Class I	JU3166	L4+24H	6	7	0	7	0	1
Class I	JU3166	L4+24H	7	6	0	6	0	1
Class I	JU3166	L4+24H	8	6	0	6	0	1
Class I	JU3166	L4+24H	9	5	0	5	0	1
Class I	JU3166	L4+24H	10	5	0	5	0	1
Class I	JU3166	L4+24H	1	8	0	8	0	1
Class I	JU3166	L4+24H	2	7	0	7	0	1
Class I	JU3166	L4+24H	3	8	0	8	0	1
Class I	JU3166	L4+24H	4	8	0	8	0	1
Class I	JU3166	L4+24H	5	7	0	7	0	1
Class I	JU3166	L4+24H	6	11	0	11	0	1
Class I	JU3166	L4+24H	7	10	0	10	0	1
Class I	JU3166	L4+24H	8	10	0	10	0	1
Class I	JU3166	L4+24H	9	6	0	6	0	1
Class I	JU3166	L4+24H	10	9	0	9	0	1
Class I	JU3166	L4+24H	1	7	0	7	0	1
Class I	JU3166	L4+24H	2	6	0	6	0	1
Class I	JU3166	L4+24H	3	6	0	6	0	1
Class I	JU3166	L4+24H	4	6	0	6	0	1
Class I	JU3166	L4+24H	5	7	0	7	0	1
Class I	JU3166	L4+24H	6	8	0	8	0	1
Class I	JU3166	L4+24H	7	6	0	6	0	1
Class I	JU3166	L4+24H	8	6	0	6	0	1
Class I	JU3166	L4+24H	9	8	0	8	0	1
Class I	JU3166	L4+24H	10	9	0	9	0	1
Class III B	JU2593	L4+48H	1	10	1	11	1	0
Class III B	JU2593	L4+48H	2	2	5	7	1	0
Class III B	JU2593	L4+48H	3	3	16	19	1	0
Class III B	JU2593	L4+48H	4	2	25	27	1	0
Class III B	JU2593	L4+48H	5	16	9	25	1	0
Class III B	JU2593	L4+48H	6	8	2	10	1	0
Class III B	JU2593	L4+48H	7	6	14	20	1	0
Class III B	JU2593	L4+48H	8	0	25	25	1	0
Class III B	JU2593	L4+48H	9	10	8	18	1	0
Class III B	JU2593	L4+48H	10	20	3	23	1	0
Class III B	JU2593	L4+48H	1	22	0	22	0	1
Class III B	JU2593	L4+48H	2	26	12	38	1	0
Class III B	JU2593	L4+48H	3	18	13	31	1	0
Class III B	JU2593	L4+48H	4	9	7	16	1	0
Class III B	JU2593	L4+48H	5	0	12	12	1	0
Class III B	JU2593	L4+48H	6	39	3	42	1	0
Class III B	JU2593	L4+48H	7	26	9	35	1	0
Class III B	JU2593	L4+48H	8	30	0	30	0	1
Class III B	JU2593	L4+48H	9	16	21	37	1	0
Class III B	JU2593	L4+48H	10	3	18	21	1	0
Class I	JU3166	L4+48H	1	10	0	10	0	1
Class I	JU3166	L4+48H	2	10	0	10	0	1
Class I	JU3166	L4+48H	3	10	0	10	0	1
Class I	JU3166	L4+48H	4	9	0	9	0	1
Class I	JU3166	L4+48H	5	17	0	17	0	1
Class I	JU3166	L4+48H	6	11	0	11	0	1
Class I	JU3166	L4+48H	7	9	0	9	0	1
Class I	JU3166	L4+48H	8	7	0	7	0	1
Class I	JU3166	L4+48H	9	10	0	10	0	1
Class I	JU3166	L4+48H	10	4	0	4	0	1
Class I	JU3166	L4+48H	1	10	0	10	0	1
Class I	JU3166	L4+48H	2	7	0	7	0	1
Class I	JU3166	L4+48H	3	9	0	9	0	1
Class I	JU3166	L4+48H	4	10	0	10	0	1
Class I	JU3166	L4+48H	5	11	0	11	0	1
Class I	JU3166	L4+48H	6	5	0	5	0	1
Class I	JU3166	L4+48H	7	11	0	11	0	1
Class I	JU3166	L4+48H	8	15	0	15	0	1
Class I	JU3166	L4+48H	9	11	0	11	0	1
Class I	JU3166	L4+48H	10	11	0	11	0	1
Class I	JU3166	L4+48H	1	12	0	12	0	1
Class I	JU3166	L4+48H	2	5	0	5	0	1
Class I	JU3166	L4+48H	3	7	0	7	0	1
Class I	JU3166	L4+48H	4	12	0	12	0	1
Class I	JU3166	L4+48H	5	1	0	1	0	1
Class I	JU3166	L4+48H	6	2	0	2	0	1
Class I	JU3166	L4+48H	7	8	0	8	0	1
Class I	JU3166	L4+48H	8	6	0	6	0	1
Class I	JU3166	L4+48H	9	8	0	8	0	1
Class I	JU3166	L4+48H	10	9	0	9	0	1
Class III B	JU2593	L4+72H	1	2	1	3	1	0
Class III B	JU2593	L4+72H	2	1	1	2	1	0
Class III B	JU2593	L4+72H	3	0	2	2	1	0
Class III B	JU2593	L4+72H	4	1	1	2	1	0
Class I	JU3166	L4+72H	1	1	0	1	0	1
Class I	JU3166	L4+72H	2	0	0	0	0	0
Class I	JU3166	L4+72H	3	1	0	1	0	1
Class I	JU3166	L4+72H	4	0	0	0	0	0
Class I	JU3166	L4+72H	5	0	0	0	0	0
Class I	JU3166	L4+72H	6	0	0	0	0	0
Class I	JU3166	L4+72H	7	6	0	6	0	1
Class I	JU3166	L4+72H	8	0	0	0	0	0
Class I	JU3166	L4+72H	9	4	0	4	0	1
Class I	JU3166	L4+72H	10	2	0	2	0	1
Class I	JU3166	L4+72H	1	0	0	0	0	0
Class I	JU3166	L4+72H	2	0	0	0	0	0
Class I	JU3166	L4+72H	3	0	0	0	0	0
Class I	JU3166	L4+72H	4	1	0	1	0	1
Class I	JU3166	L4+72H	5	3	0	3	0	1
Class I	JU3166	L4+72H	6	0	0	0	0	0
Class I	JU3166	L4+72H	7	3	0	3	0	1
Class I	JU3166	L4+72H	8	2	0	2	0	1
Class I	JU3166	L4+72H	9	2	0	2	0	1
Class I	JU3166	L4+72H	10	5	0	5	0	1
Class I	JU3166	L4+72H	1	0	0	0	0	0
Class I	JU3166	L4+72H	2	5	0	5	0	1
Class I	JU3166	L4+72H	3	0	0	0	0	0
Class I	JU3166	L4+72H	4	2	0	2	0	1
Class I	JU3166	L4+72H	5	3	0	3	0	1
Class I	JU3166	L4+72H	6	4	0	4	0	1
Class I	JU3166	L4+72H	7	2	0	2	0	1
Class I	JU3166	L4+72H	8	3	0	3	0	1
Class I	JU3166	L4+72H	9	1	0	1	0	1
Class I	JU3166	L4+72H	10	1	0	1	0	1
