# Supplementary material for: Natural variation in the Caenorhabditis elegans egg-laying circuit modulates an intergenerational fitness trade-off
Source: eLife. 2024 Apr 2;12:RP88253. doi: 10.7554/eLife.88253 (PMC10987095; doi:10.7554/eLife.88253)
Supplement: Figure 4—source data 1. [file elife-88253-fig4-data1.xlsx]

## Sheet: Figure 4
Class	Strain	Stage	indiviudal	Eggs	Hatched within 2h	Total eggs laid
Class II	N2	L4+24	1	18	0	18
Class II	N2	L4+24	2	21	0	21
Class II	N2	L4+24	3	16	0	16
Class II	N2	L4+24	4	15	0	15
Class II	N2	L4+24	5	18	0	18
Class II	N2	L4+24	6	20	0	20
Class II	N2	L4+24	7	14	0	14
Class II	N2	L4+24	8	16	0	16
Class II	N2	L4+24	9	13	0	13
Class II	N2	L4+24	10	14	0	14
Class II	N2	L4+24	11	17	0	17
Class II	N2	L4+24	12	12	0	12
Class II	N2	L4+24	13	14	0	14
Class II	N2	L4+24	14	15	0	15
Class II	N2	L4+24	15	18	0	18
Class II	N2	L4+24	16	13	0	13
Class II	N2	L4+24	17	5	0	5
Class II	N2	L4+24	18	20	0	20
Class II	N2	L4+24	19	10	0	10
Class II	N2	L4+24	20	12	0	12
Class II	QX1430	L4+24	1	17	0	17
Class II	QX1430	L4+24	2	14	0	14
Class II	QX1430	L4+24	3	9	0	9
Class II	QX1430	L4+24	4	21	0	21
Class II	QX1430	L4+24	5	10	0	10
Class II	QX1430	L4+24	6	13	0	13
Class II	QX1430	L4+24	7	16	0	16
Class II	QX1430	L4+24	8	6	0	6
Class II	QX1430	L4+24	9	16	0	16
Class II	QX1430	L4+24	10	15	0	15
Class II	QX1430	L4+24	11	15	0	15
Class II	QX1430	L4+24	12	14	0	14
Class II	QX1430	L4+24	13	21	0	21
Class II	QX1430	L4+24	14	15	0	15
Class II	QX1430	L4+24	15	16	0	16
Class II	QX1430	L4+24	16	13	0	13
Class II	QX1430	L4+24	17	19	0	19
Class II	QX1430	L4+24	18	18	0	18
Class II	QX1430	L4+24	19	14	0	14
Class II	QX1430	L4+24	20	14	0	14
Class II	CB4856	L4+24	1	13	0	13
Class II	CB4856	L4+24	2	15	0	15
Class II	CB4856	L4+24	3	12	0	12
Class II	CB4856	L4+24	4	15	0	15
Class II	CB4856	L4+24	5	14	0	14
Class II	CB4856	L4+24	6	13	0	13
Class II	CB4856	L4+24	7	13	0	13
Class II	CB4856	L4+24	8	12	0	12
Class II	CB4856	L4+24	9	15	0	15
Class II	CB4856	L4+24	10	14	0	14
Class II	CB4856	L4+24	11	17	0	17
Class II	CB4856	L4+24	12	17	0	17
Class II	CB4856	L4+24	13	11	0	11
Class II	CB4856	L4+24	14	18	0	18
Class II	CB4856	L4+24	16	18	0	18
Class II	CB4856	L4+24	17	16	0	16
Class II	CB4856	L4+24	18	15	0	15
Class II	CB4856	L4+24	19	18	0	18
Class II	CB4856	L4+24	20	18	0	18
Class II	JU1200	L4+24	1	20	0	20
Class II	JU1200	L4+24	2	17	0	17
Class II	JU1200	L4+24	3	22	0	22
Class II	JU1200	L4+24	4	17	0	17
Class II	JU1200	L4+24	5	18	0	18
Class II	JU1200	L4+24	6	15	0	15
Class II	JU1200	L4+24	7	19	0	19
Class II	JU1200	L4+24	8	13	0	13
Class II	JU1200	L4+24	9	25	0	25
Class II	JU1200	L4+24	10	18	0	18
Class II	JU1200	L4+24	11	16	0	16
Class II	JU1200	L4+24	12	16	0	16
Class II	JU1200	L4+24	13	21	0	21
Class II	JU1200	L4+24	14	20	0	20
Class II	JU1200	L4+24	15	25	0	25
Class II	JU1200	L4+24	16	20	0	20
Class II	JU1200	L4+24	17	21	0	21
Class II	JU1200	L4+24	18	16	0	16
Class II	JU1200	L4+24	19	17	0	17
Class II	JU1200	L4+24	20	19	0	19
Class I	QG2873	L4+24	1	11	0	11
Class I	QG2873	L4+24	2	12	0	12
Class I	QG2873	L4+24	3	15	0	15
Class I	QG2873	L4+24	4	14	0	14
Class I	QG2873	L4+24	5	13	0	13
Class I	QG2873	L4+24	6	17	0	17
Class I	QG2873	L4+24	7	11	0	11
Class I	QG2873	L4+24	8	11	0	11
Class I	QG2873	L4+24	9	16	0	16
Class I	QG2873	L4+24	10	11	0	11
Class I	QG2873	L4+24	11	12	0	12
Class I	QG2873	L4+24	12	13	0	13
Class I	QG2873	L4+24	13	15	0	15
Class I	QG2873	L4+24	14	14	0	14
Class I	QG2873	L4+24	15	8	0	8
Class I	QG2873	L4+24	16	14	0	14
Class I	QG2873	L4+24	17	5	0	5
Class I	QG2873	L4+24	18	18	0	18
Class I	QG2873	L4+24	19	18	0	18
Class I	QG2873	L4+24	20	10	0	10
Class I	JU3166	L4+24	1	16	0	16
Class I	JU3166	L4+24	2	13	0	13
Class I	JU3166	L4+24	3	17	0	17
Class I	JU3166	L4+24	4	16	0	16
Class I	JU3166	L4+24	5	14	0	14
Class I	JU3166	L4+24	6	16	0	16
Class I	JU3166	L4+24	7	16	0	16
Class I	JU3166	L4+24	8	14	0	14
Class I	JU3166	L4+24	9	12	0	12
Class I	JU3166	L4+24	10	9	0	9
Class I	JU3166	L4+24	11	8	0	8
Class I	JU3166	L4+24	12	19	0	19
Class I	JU3166	L4+24	13	11	0	11
Class I	JU3166	L4+24	14	21	0	21
Class I	JU3166	L4+24	15	18	0	18
Class I	JU3166	L4+24	16	19	0	19
Class I	JU3166	L4+24	17	19	0	19
Class I	JU3166	L4+24	18	23	0	23
Class I	JU3166	L4+24	19	19	0	19
Class I	JU3166	L4+24	20	17	0	17
Class III A	JU440	L4+24	1	23	0	23
Class III A	JU440	L4+24	2	17	0	17
Class III A	JU440	L4+24	3	23	0	23
Class III A	JU440	L4+24	4	20	0	20
Class III A	JU440	L4+24	5	22	0	22
Class III A	JU440	L4+24	6	15	0	15
Class III A	JU440	L4+24	7	23	0	23
Class III A	JU440	L4+24	8	17	0	17
Class III A	JU440	L4+24	9	17	0	17
Class III A	JU440	L4+24	10	18	0	18
Class III A	JU440	L4+24	11	19	0	19
Class III A	JU440	L4+24	12	21	0	21
Class III A	JU440	L4+24	13	20	0	20
Class III A	JU440	L4+24	14	23	0	23
Class III A	JU440	L4+24	15	25	0	25
Class III A	JU440	L4+24	16	23	0	23
Class III A	JU440	L4+24	17	20	0	20
Class III A	JU440	L4+24	18	12	0	12
Class III A	JU440	L4+24	19	13	0	13
Class III A	JU440	L4+24	20	20	0	20
Class III A	JU830	L4+24	1	15	0	15
Class III A	JU830	L4+24	2	14	0	14
Class III A	JU830	L4+24	3	16	0	16
Class III A	JU830	L4+24	4	13	0	13
Class III A	JU830	L4+24	5	17	0	17
Class III A	JU830	L4+24	6	16	0	16
Class III A	JU830	L4+24	7	13	0	13
Class III A	JU830	L4+24	8	4	0	4
Class III A	JU830	L4+24	9	8	0	8
Class III A	JU830	L4+24	11	16	0	16
Class III A	JU830	L4+24	12	12	0	12
Class III A	JU830	L4+24	13	14	0	14
Class III A	JU830	L4+24	14	15	0	15
Class III A	JU830	L4+24	15	16	0	16
Class III A	JU830	L4+24	16	13	0	13
Class III A	JU830	L4+24	17	13	0	13
Class III A	JU830	L4+24	18	19	0	19
Class III A	JU830	L4+24	19	10	0	10
Class III A	JU830	L4+24	20	16	0	16
Class III A	JU2829	L4+24	1	18	0	18
Class III A	JU2829	L4+24	2	23	0	23
Class III A	JU2829	L4+24	3	21	0	21
Class III A	JU2829	L4+24	4	16	0	16
Class III A	JU2829	L4+24	5	15	0	15
Class III A	JU2829	L4+24	6	19	0	19
Class III A	JU2829	L4+24	7	19	0	19
Class III A	JU2829	L4+24	8	16	0	16
Class III A	JU2829	L4+24	9	18	0	18
Class III A	JU2829	L4+24	10	10	0	10
Class III A	JU2829	L4+24	11	13	0	13
Class III A	JU2829	L4+24	12	12	0	12
Class III A	JU2829	L4+24	13	19	0	19
Class III A	JU2829	L4+24	14	13	0	13
Class III A	JU2829	L4+24	15	11	0	11
Class III A	JU2829	L4+24	16	13	0	13
Class III A	JU2829	L4+24	18	12	0	12
Class III A	JU2829	L4+24	19	0	0	0
Class III A	ED3005	L4+24	1	20	0	20
Class III A	ED3005	L4+24	2	11	0	11
Class III A	ED3005	L4+24	3	6	0	6
Class III A	ED3005	L4+24	4	10	0	10
Class III A	ED3005	L4+24	5	12	0	12
Class III A	ED3005	L4+24	6	12	0	12
Class III A	ED3005	L4+24	7	2	0	2
Class III A	ED3005	L4+24	8	6	0	6
Class III A	ED3005	L4+24	9	13	0	13
Class III A	ED3005	L4+24	10	19	0	19
Class III A	ED3005	L4+24	11	14	0	14
Class III A	ED3005	L4+24	12	11	0	11
Class III A	ED3005	L4+24	15	13	0	13
Class III A	ED3005	L4+24	16	15	0	15
Class III A	ED3005	L4+24	17	11	0	11
Class III A	ED3005	L4+24	18	15	0	15
Class III A	ED3005	L4+24	19	15	0	15
Class III A	ED3005	L4+24	20	19	0	19
Class III A	NIC1786	L4+24	1	17	0	17
Class III A	NIC1786	L4+24	2	13	0	13
Class III A	NIC1786	L4+24	3	10	0	10
Class III A	NIC1786	L4+24	4	11	0	11
Class III A	NIC1786	L4+24	5	15	0	15
Class III A	NIC1786	L4+24	6	14	0	14
Class III A	NIC1786	L4+24	7	7	0	7
Class III A	NIC1786	L4+24	8	9	0	9
Class III A	NIC1786	L4+24	9	12	0	12
Class III A	NIC1786	L4+24	10	17	0	17
Class III A	NIC1786	L4+24	11	11	0	11
Class III A	NIC1786	L4+24	12	14	0	14
Class III A	NIC1786	L4+24	14	19	0	19
Class III A	NIC1786	L4+24	15	21	0	21
Class III A	NIC1786	L4+24	16	13	0	13
Class III A	NIC1786	L4+24	17	13	0	13
Class III A	NIC1786	L4+24	18	16	0	16
Class III A	NIC1786	L4+24	20	5	0	5
Class III B	JU751	L4+24	1	4	0	4
Class III B	JU751	L4+24	2	5	0	5
Class III B	JU751	L4+24	3	11	0	11
Class III B	JU751	L4+24	4	0	0	0
Class III B	JU751	L4+24	5	8	0	8
Class III B	JU751	L4+24	6	11	0	11
Class III B	JU751	L4+24	7	6	0	6
Class III B	JU751	L4+24	8	12	0	12
Class III B	JU751	L4+24	9	11	0	11
Class III B	JU751	L4+24	10	3	0	3
Class III B	JU751	L4+24	11	9	0	9
Class III B	JU751	L4+24	12	14	0	14
Class III B	JU751	L4+24	13	10	0	10
Class III B	JU751	L4+24	15	12	0	12
Class III B	JU751	L4+24	16	11	0	11
Class III B	JU751	L4+24	17	10	0	10
Class III B	JU751	L4+24	18	12	0	12
Class III B	JU751	L4+24	19	11	0	11
Class III B	JU751	L4+24	20	11	0	11
Class III B	JU2593	L4+24	1	3	0	3
Class III B	JU2593	L4+24	2	13	0	13
Class III B	JU2593	L4+24	3	8	0	8
Class III B	JU2593	L4+24	4	1	0	1
Class III B	JU2593	L4+24	5	11	0	11
Class III B	JU2593	L4+24	7	9	0	9
Class III B	JU2593	L4+24	8	2	0	2
Class III B	JU2593	L4+24	9	1	0	1
Class III B	JU2593	L4+24	11	8	0	8
Class III B	JU2593	L4+24	12	4	0	4
Class III B	JU2593	L4+24	13	0	0	0
Class III B	JU2593	L4+24	14	3	0	3
Class III B	JU2593	L4+24	15	6	0	6
Class III B	JU2593	L4+24	16	7	0	7
Class III B	JU2593	L4+24	17	0	0	0
Class III B	JU2593	L4+24	18	0	0	0
Class III B	JU2593	L4+24	19	7	0	7
Class III B	JU2593	L4+24	20	7	0	7
Class III B	JU2587	L4+24	1	11	0	11
Class III B	JU2587	L4+24	2	14	0	14
Class III B	JU2587	L4+24	3	13	0	13
Class III B	JU2587	L4+24	4	13	0	13
Class III B	JU2587	L4+24	6	16	0	16
Class III B	JU2587	L4+24	7	4	0	4
Class III B	JU2587	L4+24	9	7	0	7
Class III B	JU2587	L4+24	10	10	0	10
Class III B	JU2587	L4+24	11	10	0	10
Class III B	JU2587	L4+24	12	9	0	9
Class III B	JU2587	L4+24	13	5	0	5
Class III B	JU2587	L4+24	14	7	0	7
Class III B	JU2587	L4+24	15	14	0	14
Class III B	JU2587	L4+24	16	3	0	3
Class III B	JU2587	L4+24	17	2	0	2
Class III B	JU2587	L4+24	18	14	0	14
Class III B	JU2587	L4+24	19	6	0	6
Class III B	JU2587	L4+24	20	14	0	14
Class III B	NIC1832	L4+24	1	16	0	16
Class III B	NIC1832	L4+24	4	10	0	10
Class III B	NIC1832	L4+24	5	11	0	11
Class III B	NIC1832	L4+24	6	10	0	10
Class III B	NIC1832	L4+24	7	9	0	9
Class III B	NIC1832	L4+24	8	14	0	14
Class III B	NIC1832	L4+24	10	9	0	9
Class III B	NIC1832	L4+24	11	12	0	12
Class III B	NIC1832	L4+24	12	8	0	8
Class III B	NIC1832	L4+24	13	4	0	4
Class III B	NIC1832	L4+24	14	8	0	8
Class III B	NIC1832	L4+24	15	6	0	6
Class III B	NIC1832	L4+24	16	8	0	8
Class III B	NIC1832	L4+24	17	13	0	13
Class III B	NIC1832	L4+24	18	11	0	11
Class III B	NIC1832	L4+24	19	4	0	4
Class III B	NIC1832	L4+24	20	7	0	7
Class II	N2	L4+30	1	13	0	13
Class II	N2	L4+30	2	13	0	13
Class II	N2	L4+30	3	19	0	19
Class II	N2	L4+30	4	23	0	23
Class II	N2	L4+30	5	15	0	15
Class II	N2	L4+30	6	14	0	14
Class II	N2	L4+30	7	15	0	15
Class II	N2	L4+30	8	19	0	19
Class II	N2	L4+30	9	18	0	18
Class II	N2	L4+30	10	15	0	15
Class II	N2	L4+30	11	20	0	20
Class II	N2	L4+30	12	16	0	16
Class II	N2	L4+30	13	19	0	19
Class II	N2	L4+30	15	17	0	17
Class II	N2	L4+30	16	20	0	20
Class II	N2	L4+30	18	17	0	17
Class II	N2	L4+30	19	18	0	18
Class II	QX1430	L4+30	1	16	0	16
Class II	QX1430	L4+30	2	17	0	17
Class II	QX1430	L4+30	3	15	0	15
Class II	QX1430	L4+30	4	9	0	9
Class II	QX1430	L4+30	5	11	0	11
Class II	QX1430	L4+30	7	17	0	17
Class II	QX1430	L4+30	8	15	0	15
Class II	QX1430	L4+30	9	19	0	19
Class II	QX1430	L4+30	10	18	0	18
Class II	QX1430	L4+30	11	16	0	16
Class II	QX1430	L4+30	12	17	0	17
Class II	QX1430	L4+30	13	20	0	20
Class II	QX1430	L4+30	14	20	0	20
Class II	QX1430	L4+30	15	16	0	16
Class II	QX1430	L4+30	16	14	0	14
Class II	QX1430	L4+30	17	23	0	23
Class II	QX1430	L4+30	18	14	0	14
Class II	QX1430	L4+30	19	22	0	22
Class II	QX1430	L4+30	20	21	0	21
Class II	CB4856	L4+30	2	20	0	20
Class II	CB4856	L4+30	4	23	0	23
Class II	CB4856	L4+30	5	21	0	21
Class II	CB4856	L4+30	6	19	0	19
Class II	CB4856	L4+30	7	16	0	16
Class II	CB4856	L4+30	8	20	0	20
Class II	CB4856	L4+30	9	20	0	20
Class II	CB4856	L4+30	10	18	0	18
Class II	CB4856	L4+30	11	14	0	14
Class II	CB4856	L4+30	12	17	0	17
Class II	CB4856	L4+30	13	19	0	19
Class II	CB4856	L4+30	15	17	0	17
Class II	CB4856	L4+30	16	19	0	19
Class II	CB4856	L4+30	19	12	0	12
Class II	CB4856	L4+30	20	17	0	17
Class II	JU1200	L4+30	1	22	0	22
Class II	JU1200	L4+30	3	19	0	19
Class II	JU1200	L4+30	4	22	0	22
Class II	JU1200	L4+30	5	19	0	19
Class II	JU1200	L4+30	6	17	0	17
Class II	JU1200	L4+30	7	19	0	19
Class II	JU1200	L4+30	8	24	0	24
Class II	JU1200	L4+30	9	18	0	18
Class II	JU1200	L4+30	11	19	0	19
Class II	JU1200	L4+30	12	21	0	21
Class II	JU1200	L4+30	13	26	0	26
Class II	JU1200	L4+30	15	17	0	17
Class II	JU1200	L4+30	16	21	0	21
Class II	JU1200	L4+30	17	0	0	0
Class II	JU1200	L4+30	18	24	0	24
Class II	JU1200	L4+30	19	25	0	25
Class II	JU1200	L4+30	20	23	0	23
Class I	QG2873	L4+30	1	10	0	10
Class I	QG2873	L4+30	2	14	0	14
Class I	QG2873	L4+30	3	16	0	16
Class I	QG2873	L4+30	4	14	0	14
Class I	QG2873	L4+30	5	17	0	17
Class I	QG2873	L4+30	6	12	0	12
Class I	QG2873	L4+30	7	15	0	15
Class I	QG2873	L4+30	8	11	0	11
Class I	QG2873	L4+30	9	16	0	16
Class I	QG2873	L4+30	10	11	0	11
Class I	QG2873	L4+30	11	14	0	14
Class I	QG2873	L4+30	13	15	0	15
Class I	QG2873	L4+30	14	17	0	17
Class I	QG2873	L4+30	16	10	0	10
Class I	QG2873	L4+30	17	16	0	16
Class I	QG2873	L4+30	18	20	0	20
Class I	QG2873	L4+30	19	19	0	19
Class I	QG2873	L4+30	20	18	0	18
Class I	JU3166	L4+30	1	13	0	13
Class I	JU3166	L4+30	2	12	0	12
Class I	JU3166	L4+30	3	11	0	11
Class I	JU3166	L4+30	4	15	0	15
Class I	JU3166	L4+30	5	13	0	13
Class I	JU3166	L4+30	6	17	0	17
Class I	JU3166	L4+30	7	11	0	11
Class I	JU3166	L4+30	8	18	0	18
Class I	JU3166	L4+30	9	18	0	18
Class I	JU3166	L4+30	10	16	0	16
Class I	JU3166	L4+30	11	22	0	22
Class I	JU3166	L4+30	13	24	0	24
Class I	JU3166	L4+30	14	25	0	25
Class I	JU3166	L4+30	15	19	0	19
Class I	JU3166	L4+30	16	24	0	24
Class I	JU3166	L4+30	17	17	0	17
Class I	JU3166	L4+30	18	16	0	16
Class I	JU3166	L4+30	19	26	0	26
Class I	JU3166	L4+30	20	22	0	22
Class III A	JU440	L4+30	1	22	0	22
Class III A	JU440	L4+30	2	21	0	21
Class III A	JU440	L4+30	3	15	0	15
Class III A	JU440	L4+30	4	16	0	16
Class III A	JU440	L4+30	5	13	0	13
Class III A	JU440	L4+30	6	20	0	20
Class III A	JU440	L4+30	8	17	0	17
Class III A	JU440	L4+30	9	18	0	18
Class III A	JU440	L4+30	10	16	0	16
Class III A	JU440	L4+30	11	21	0	21
Class III A	JU440	L4+30	12	20	0	20
Class III A	JU440	L4+30	13	27	0	27
Class III A	JU440	L4+30	16	20	0	20
Class III A	JU440	L4+30	18	24	0	24
Class III A	JU440	L4+30	20	18	0	18
Class III A	JU830	L4+30	3	22	0	22
Class III A	JU830	L4+30	4	14	0	14
Class III A	JU830	L4+30	5	22	0	22
Class III A	JU830	L4+30	6	17	0	17
Class III A	JU830	L4+30	7	24	0	24
Class III A	JU830	L4+30	8	18	0	18
Class III A	JU830	L4+30	9	9	0	9
Class III A	JU830	L4+30	11	13	0	13
Class III A	JU830	L4+30	12	7	0	7
Class III A	JU830	L4+30	14	14	0	14
Class III A	JU830	L4+30	15	21	0	21
Class III A	JU830	L4+30	17	16	0	16
Class III A	JU830	L4+30	19	14	0	14
Class III A	JU830	L4+30	20	13	0	13
Class III A	JU2829	L4+30	1	9	0	9
Class III A	JU2829	L4+30	2	15	0	15
Class III A	JU2829	L4+30	3	11	0	11
Class III A	JU2829	L4+30	4	16	0	16
Class III A	JU2829	L4+30	5	19	0	19
Class III A	JU2829	L4+30	6	13	0	13
Class III A	JU2829	L4+30	7	20	0	20
Class III A	JU2829	L4+30	8	23	0	23
Class III A	JU2829	L4+30	9	22	0	22
Class III A	JU2829	L4+30	11	15	0	15
Class III A	JU2829	L4+30	12	11	0	11
Class III A	JU2829	L4+30	14	15	0	15
Class III A	JU2829	L4+30	15	6	0	6
Class III A	JU2829	L4+30	16	10	0	10
Class III A	JU2829	L4+30	17	14	0	14
Class III A	JU2829	L4+30	19	22	0	22
Class III A	JU2829	L4+30	20	15	0	15
Class III A	ED3005	L4+30	1	16	0	16
Class III A	ED3005	L4+30	2	20	0	20
Class III A	ED3005	L4+30	4	17	0	17
Class III A	ED3005	L4+30	5	11	0	11
Class III A	ED3005	L4+30	6	20	0	20
Class III A	ED3005	L4+30	9	10	0	10
Class III A	ED3005	L4+30	12	20	0	20
Class III A	ED3005	L4+30	16	8	0	8
Class III A	ED3005	L4+30	17	7	0	7
Class III A	ED3005	L4+30	18	11	0	11
Class III A	ED3005	L4+30	19	21	0	21
Class III A	NIC1786	L4+30	1	12	0	12
Class III A	NIC1786	L4+30	2	18	0	18
Class III A	NIC1786	L4+30	3	23	0	23
Class III A	NIC1786	L4+30	4	24	0	24
Class III A	NIC1786	L4+30	5	20	0	20
Class III A	NIC1786	L4+30	6	21	0	21
Class III A	NIC1786	L4+30	7	12	0	12
Class III A	NIC1786	L4+30	8	22	0	22
Class III A	NIC1786	L4+30	9	19	0	19
Class III A	NIC1786	L4+30	10	19	0	19
Class III A	NIC1786	L4+30	11	19	0	19
Class III A	NIC1786	L4+30	13	26	0	26
Class III A	NIC1786	L4+30	14	23	0	23
Class III A	NIC1786	L4+30	18	20	0	20
Class III A	NIC1786	L4+30	19	17	0	17
Class III A	NIC1786	L4+30	20	25	0	25
Class III B	JU751	L4+30	1	15	0	15
Class III B	JU751	L4+30	3	9	0	9
Class III B	JU751	L4+30	4	10	0	10
Class III B	JU751	L4+30	6	10	0	10
Class III B	JU751	L4+30	8	3	0	3
Class III B	JU751	L4+30	9	13	0	13
Class III B	JU751	L4+30	10	8	0	8
Class III B	JU751	L4+30	11	6	0	6
Class III B	JU751	L4+30	12	14	0	14
Class III B	JU751	L4+30	13	10	0	10
Class III B	JU751	L4+30	15	1	0	1
Class III B	JU751	L4+30	16	15	0	15
Class III B	JU751	L4+30	17	12	0	12
Class III B	JU751	L4+30	18	8	0	8
Class III B	JU751	L4+30	20	2	0	2
Class III B	JU2593	L4+30	2	0	0	0
Class III B	JU2593	L4+30	3	0	0	0
Class III B	JU2593	L4+30	4	0	0	0
Class III B	JU2593	L4+30	5	0	0	0
Class III B	JU2593	L4+30	6	0	0	0
Class III B	JU2593	L4+30	7	4	0	4
Class III B	JU2593	L4+30	8	0	0	0
Class III B	JU2593	L4+30	9	0	0	0
Class III B	JU2593	L4+30	10	5	0	5
Class III B	JU2593	L4+30	11	3	0	3
Class III B	JU2593	L4+30	13	1	0	1
Class III B	JU2593	L4+30	14	11	0	11
Class III B	JU2593	L4+30	16	5	0	5
Class III B	JU2593	L4+30	17	2	0	2
Class III B	JU2593	L4+30	18	5	0	5
Class III B	JU2593	L4+30	19	4	0	4
Class III B	JU2593	L4+30	20	7	0	7
Class III B	JU2587	L4+30	2	7	0	7
Class III B	JU2587	L4+30	3	13	0	13
Class III B	JU2587	L4+30	4	20	0	20
Class III B	JU2587	L4+30	5	9	0	9
Class III B	JU2587	L4+30	6	16	0	16
Class III B	JU2587	L4+30	7	8	0	8
Class III B	JU2587	L4+30	8	10	0	10
Class III B	JU2587	L4+30	9	1	0	1
Class III B	JU2587	L4+30	11	4	0	4
Class III B	JU2587	L4+30	12	8	0	8
Class III B	JU2587	L4+30	14	20	0	20
Class III B	JU2587	L4+30	16	4	0	4
Class III B	JU2587	L4+30	18	21	0	21
Class III B	JU2587	L4+30	19	0	0	0
Class III B	JU2587	L4+30	20	9	0	9
Class III B	NIC1832	L4+30	1	12	0	12
Class III B	NIC1832	L4+30	2	11	0	11
Class III B	NIC1832	L4+30	3	10	0	10
Class III B	NIC1832	L4+30	4	5	0	5
Class III B	NIC1832	L4+30	5	13	0	13
Class III B	NIC1832	L4+30	7	17	0	17
Class III B	NIC1832	L4+30	8	16	0	16
Class III B	NIC1832	L4+30	9	8	0	8
Class III B	NIC1832	L4+30	10	4	0	4
Class III B	NIC1832	L4+30	11	9	0	9
Class III B	NIC1832	L4+30	12	7	0	7
Class III B	NIC1832	L4+30	13	13	0	13
Class III B	NIC1832	L4+30	16	8	0	8
Class III B	NIC1832	L4+30	18	17	0	17
Class III B	NIC1832	L4+30	19	9	0	9
Class III B	NIC1832	L4+30	20	4	0	4
Class II	N2	L4+48	1	27	0	27
Class II	N2	L4+48	2	18	0	18
Class II	N2	L4+48	3	28	0	28
Class II	N2	L4+48	4	21	0	21
Class II	N2	L4+48	5	23	0	23
Class II	N2	L4+48	6	6	0	6
Class II	N2	L4+48	7	21	0	21
Class II	N2	L4+48	8	16	0	16
Class II	N2	L4+48	9	24	0	24
Class II	N2	L4+48	10	10	0	10
Class II	N2	L4+48	11	8	0	8
Class II	N2	L4+48	12	16	0	16
Class II	N2	L4+48	13	14	0	14
Class II	N2	L4+48	16	19	0	19
Class II	N2	L4+48	17	27	0	27
Class II	N2	L4+48	18	17	0	17
Class II	N2	L4+48	19	9	0	9
Class II	N2	L4+48	20	19	0	19
Class II	QX1430	L4+48	1	23	0	23
Class II	QX1430	L4+48	2	14	0	14
Class II	QX1430	L4+48	3	21	0	21
Class II	QX1430	L4+48	4	20	0	20
Class II	QX1430	L4+48	6	16	0	16
Class II	QX1430	L4+48	7	19	0	19
Class II	QX1430	L4+48	8	17	0	17
Class II	QX1430	L4+48	9	14	0	14
Class II	QX1430	L4+48	10	21	0	21
Class II	QX1430	L4+48	11	18	0	18
Class II	QX1430	L4+48	12	16	0	16
Class II	QX1430	L4+48	13	7	0	7
Class II	QX1430	L4+48	14	20	0	20
Class II	QX1430	L4+48	15	19	0	19
Class II	QX1430	L4+48	16	19	0	19
Class II	QX1430	L4+48	17	13	0	13
Class II	QX1430	L4+48	18	15	0	15
Class II	QX1430	L4+48	19	13	0	13
Class II	QX1430	L4+48	20	19	0	19
Class II	CB4856	L4+48	1	18	0	18
Class II	CB4856	L4+48	2	14	0	14
Class II	CB4856	L4+48	3	4	0	4
Class II	CB4856	L4+48	4	16	0	16
Class II	CB4856	L4+48	5	16	0	16
Class II	CB4856	L4+48	6	27	0	27
Class II	CB4856	L4+48	9	17	0	17
Class II	CB4856	L4+48	10	19	0	19
Class II	CB4856	L4+48	11	6	0	6
Class II	CB4856	L4+48	12	19	0	19
Class II	CB4856	L4+48	13	7	0	7
Class II	CB4856	L4+48	14	23	0	23
Class II	CB4856	L4+48	15	20	0	20
Class II	CB4856	L4+48	16	16	0	16
Class II	CB4856	L4+48	17	22	0	22
Class II	CB4856	L4+48	18	0	0	0
Class II	CB4856	L4+48	19	23	0	23
Class II	CB4856	L4+48	20	11	0	11
Class II	JU1200	L4+48	1	24	0	24
Class II	JU1200	L4+48	2	25	0	25
Class II	JU1200	L4+48	3	19	0	19
Class II	JU1200	L4+48	4	21	0	21
Class II	JU1200	L4+48	5	11	0	11
Class II	JU1200	L4+48	6	23	0	23
Class II	JU1200	L4+48	7	21	0	21
Class II	JU1200	L4+48	8	23	0	23
Class II	JU1200	L4+48	9	19	0	19
Class II	JU1200	L4+48	10	27	0	27
Class II	JU1200	L4+48	11	19	0	19
Class II	JU1200	L4+48	12	8	0	8
Class II	JU1200	L4+48	13	16	0	16
Class II	JU1200	L4+48	14	16	0	16
Class II	JU1200	L4+48	15	0	0	0
Class II	JU1200	L4+48	16	29	0	29
Class II	JU1200	L4+48	17	22	0	22
Class II	JU1200	L4+48	18	13	0	13
Class II	JU1200	L4+48	19	14	0	14
Class II	JU1200	L4+48	20	14	0	14
Class I	QG2873	L4+48	1	13	0	13
Class I	QG2873	L4+48	2	18	0	18
Class I	QG2873	L4+48	3	15	0	15
Class I	QG2873	L4+48	4	14	0	14
Class I	QG2873	L4+48	5	12	0	12
Class I	QG2873	L4+48	6	19	0	19
Class I	QG2873	L4+48	7	16	0	16
Class I	QG2873	L4+48	8	16	0	16
Class I	QG2873	L4+48	9	11	0	11
Class I	QG2873	L4+48	10	16	0	16
Class I	QG2873	L4+48	11	17	0	17
Class I	QG2873	L4+48	12	10	0	10
Class I	QG2873	L4+48	13	2	0	2
Class I	QG2873	L4+48	14	15	0	15
Class I	QG2873	L4+48	15	1	0	1
Class I	QG2873	L4+48	16	17	0	17
Class I	QG2873	L4+48	17	12	0	12
Class I	QG2873	L4+48	18	13	0	13
Class I	QG2873	L4+48	19	12	0	12
Class I	QG2873	L4+48	20	14	0	14
Class I	JU3166	L4+48	1	15	0	15
Class I	JU3166	L4+48	2	22	0	22
Class I	JU3166	L4+48	3	9	0	9
Class I	JU3166	L4+48	4	20	0	20
Class I	JU3166	L4+48	5	22	0	22
Class I	JU3166	L4+48	6	19	0	19
Class I	JU3166	L4+48	7	18	0	18
Class I	JU3166	L4+48	8	20	0	20
Class I	JU3166	L4+48	9	19	0	19
Class I	JU3166	L4+48	10	18	0	18
Class I	JU3166	L4+48	11	7	0	7
Class I	JU3166	L4+48	12	2	0	2
Class I	JU3166	L4+48	13	15	0	15
Class I	JU3166	L4+48	14	21	0	21
Class I	JU3166	L4+48	15	0	0	0
Class I	JU3166	L4+48	16	1	0	1
Class I	JU3166	L4+48	17	17	0	17
Class I	JU3166	L4+48	18	16	0	16
Class I	JU3166	L4+48	19	15	0	15
Class I	JU3166	L4+48	20	15	0	15
Class III A	JU440	L4+48	1	7	0	7
Class III A	JU440	L4+48	2	16	0	16
Class III A	JU440	L4+48	4	23	0	23
Class III A	JU440	L4+48	7	25	0	25
Class III A	JU440	L4+48	8	23	0	23
Class III A	JU440	L4+48	9	23	0	23
Class III A	JU440	L4+48	10	14	0	14
Class III A	JU440	L4+48	11	23	0	23
Class III A	JU440	L4+48	13	24	0	24
Class III A	JU440	L4+48	14	28	0	28
Class III A	JU440	L4+48	15	15	0	15
Class III A	JU440	L4+48	16	24	0	24
Class III A	JU440	L4+48	17	11	0	11
Class III A	JU440	L4+48	18	19	0	19
Class III A	JU440	L4+48	19	12	0	12
Class III A	JU440	L4+48	20	20	0	20
Class III A	JU830	L4+48	5	11	0	11
Class III A	JU830	L4+48	7	25	0	25
Class III A	JU830	L4+48	8	4	0	4
Class III A	JU830	L4+48	10	11	0	11
Class III A	JU830	L4+48	11	8	0	8
Class III A	JU830	L4+48	12	3	0	3
Class III A	JU830	L4+48	15	2	0	2
Class III A	JU830	L4+48	18	0	0	0
Class III A	JU830	L4+48	19	0	0	0
Class III A	JU830	L4+48	20	0	0	0
Class III A	JU2829	L4+48	1	2	0	2
Class III A	JU2829	L4+48	3	6	0	6
Class III A	JU2829	L4+48	4	1	0	1
Class III A	JU2829	L4+48	5	10	0	10
Class III A	JU2829	L4+48	6	2	0	2
Class III A	JU2829	L4+48	7	0	0	0
Class III A	JU2829	L4+48	8	6	0	6
Class III A	JU2829	L4+48	9	3	0	3
Class III A	JU2829	L4+48	10	1	0	1
Class III A	JU2829	L4+48	12	2	0	2
Class III A	JU2829	L4+48	13	3	0	3
Class III A	JU2829	L4+48	14	0	0	0
Class III A	JU2829	L4+48	15	0	0	0
Class III A	JU2829	L4+48	16	0	0	0
Class III A	JU2829	L4+48	17	1	0	1
Class III A	JU2829	L4+48	18	5	0	5
Class III A	JU2829	L4+48	19	1	0	1
Class III A	JU2829	L4+48	20	0	0	0
Class III A	ED3005	L4+48	2	11	0	11
Class III A	ED3005	L4+48	4	7	0	7
Class III A	ED3005	L4+48	5	17	0	17
Class III A	ED3005	L4+48	6	9	0	9
Class III A	ED3005	L4+48	7	6	0	6
Class III A	ED3005	L4+48	8	5	0	5
Class III A	ED3005	L4+48	9	10	0	10
Class III A	ED3005	L4+48	10	15	0	15
Class III A	ED3005	L4+48	11	5	0	5
Class III A	ED3005	L4+48	12	4	0	4
Class III A	ED3005	L4+48	13	0	0	0
Class III A	ED3005	L4+48	14	4	0	4
Class III A	ED3005	L4+48	15	5	0	5
Class III A	ED3005	L4+48	16	0	0	0
Class III A	ED3005	L4+48	17	0	0	0
Class III A	ED3005	L4+48	18	1	0	1
Class III A	ED3005	L4+48	19	8	0	8
Class III A	ED3005	L4+48	20	3	0	3
Class III A	NIC1786	L4+48	2	12	0	12
Class III A	NIC1786	L4+48	4	10	0	10
Class III A	NIC1786	L4+48	5	19	0	19
Class III A	NIC1786	L4+48	6	4	0	4
Class III A	NIC1786	L4+48	7	16	0	16
Class III A	NIC1786	L4+48	8	0	0	0
Class III A	NIC1786	L4+48	9	13	0	13
Class III A	NIC1786	L4+48	10	10	0	10
Class III A	NIC1786	L4+48	11	8	0	8
Class III A	NIC1786	L4+48	13	12	0	12
Class III A	NIC1786	L4+48	14	3	0	3
Class III A	NIC1786	L4+48	15	11	0	11
Class III A	NIC1786	L4+48	16	7	0	7
Class III A	NIC1786	L4+48	18	3	0	3
Class III A	NIC1786	L4+48	19	0	0	0
Class III A	NIC1786	L4+48	20	0	0	0
Class III B	JU751	L4+48	4	6	0	6
Class III B	JU751	L4+48	5	9	0	9
Class III B	JU751	L4+48	6	6	0	6
Class III B	JU751	L4+48	7	6	0	6
Class III B	JU751	L4+48	10	4	0	4
Class III B	JU751	L4+48	15	9	0	9
Class III B	JU751	L4+48	18	5	0	5
Class III B	JU751	L4+48	19	0	0	0
Class III B	JU2593	L4+48	6	0	0	0
Class III B	JU2593	L4+48	13	0	0	0
Class III B	JU2593	L4+48	15	10	0	10
Class III B	JU2593	L4+48	16	4	0	4
Class III B	JU2593	L4+48	19	2	0	2
Class III B	JU2587	L4+48	1	13	0	13
Class III B	JU2587	L4+48	2	0	0	0
Class III B	JU2587	L4+48	3	4	0	4
Class III B	JU2587	L4+48	6	9	0	9
Class III B	JU2587	L4+48	7	0	0	0
Class III B	JU2587	L4+48	8	0	0	0
Class III B	JU2587	L4+48	14	2	0	2
Class III B	JU2587	L4+48	15	0	0	0
Class III B	JU2587	L4+48	18	0	0	0
Class III B	JU2587	L4+48	20	2	0	2
Class III B	NIC1832	L4+48	1	5	0	5
Class III B	NIC1832	L4+48	5	2	0	2
Class III B	NIC1832	L4+48	6	1	0	1
Class III B	NIC1832	L4+48	7	1	0	1
Class III B	NIC1832	L4+48	8	20	0	20
Class III B	NIC1832	L4+48	9	2	0	2
Class III B	NIC1832	L4+48	15	0	0	0
Class III B	NIC1832	L4+48	18	3	0	3
Class II	N2	L4+56	2	15	0	15
Class II	N2	L4+56	3	18	0	18
Class II	N2	L4+56	4	17	0	17
Class II	N2	L4+56	5	12	0	12
Class II	N2	L4+56	8	25	0	25
Class II	N2	L4+56	9	8	0	8
Class II	N2	L4+56	10	16	0	16
Class II	N2	L4+56	11	6	0	6
Class II	N2	L4+56	12	4	0	4
Class II	N2	L4+56	13	19	0	19
Class II	N2	L4+56	14	2	0	2
Class II	N2	L4+56	15	14	0	14
Class II	N2	L4+56	16	18	0	18
Class II	N2	L4+56	17	5	0	5
Class II	N2	L4+56	18	8	0	8
Class II	N2	L4+56	19	2	0	2
Class II	N2	L4+56	20	4	0	4
Class II	QX1430	L4+56	1	3	0	3
Class II	QX1430	L4+56	2	13	0	13
Class II	QX1430	L4+56	3	1	0	1
Class II	QX1430	L4+56	4	4	0	4
Class II	QX1430	L4+56	6	3	0	3
Class II	QX1430	L4+56	7	8	0	8
Class II	QX1430	L4+56	8	3	0	3
Class II	QX1430	L4+56	9	4	0	4
Class II	QX1430	L4+56	10	12	0	12
Class II	QX1430	L4+56	11	5	0	5
Class II	QX1430	L4+56	12	21	0	21
Class II	QX1430	L4+56	13	16	0	16
Class II	QX1430	L4+56	14	10	0	10
Class II	QX1430	L4+56	15	5	0	5
Class II	QX1430	L4+56	16	0	0	0
Class II	QX1430	L4+56	17	0	0	0
Class II	QX1430	L4+56	18	0	0	0
Class II	QX1430	L4+56	19	13	0	13
Class II	QX1430	L4+56	20	12	0	12
Class II	CB4856	L4+56	1	1	0	1
Class II	CB4856	L4+56	3	5	0	5
Class II	CB4856	L4+56	5	0	0	0
Class II	CB4856	L4+56	6	0	0	0
Class II	CB4856	L4+56	7	9	0	9
Class II	CB4856	L4+56	8	0	0	0
Class II	CB4856	L4+56	9	1	0	1
Class II	CB4856	L4+56	11	0	0	0
Class II	CB4856	L4+56	12	2	0	2
Class II	CB4856	L4+56	13	2	0	2
Class II	CB4856	L4+56	14	0	0	0
Class II	CB4856	L4+56	15	5	0	5
Class II	CB4856	L4+56	16	1	0	1
Class II	CB4856	L4+56	17	0	0	0
Class II	CB4856	L4+56	18	4	0	4
Class II	CB4856	L4+56	19	2	0	2
Class II	CB4856	L4+56	20	1	0	1
Class II	JU1200	L4+56	1	6	0	6
Class II	JU1200	L4+56	3	3	0	3
Class II	JU1200	L4+56	4	7	0	7
Class II	JU1200	L4+56	5	0	0	0
Class II	JU1200	L4+56	6	2	0	2
Class II	JU1200	L4+56	7	3	0	3
Class II	JU1200	L4+56	8	7	0	7
Class II	JU1200	L4+56	9	3	0	3
Class II	JU1200	L4+56	11	2	0	2
Class II	JU1200	L4+56	12	5	0	5
Class II	JU1200	L4+56	13	14	0	14
Class II	JU1200	L4+56	14	7	0	7
Class II	JU1200	L4+56	15	9	0	9
Class II	JU1200	L4+56	17	0	0	0
Class II	JU1200	L4+56	18	4	0	4
Class II	JU1200	L4+56	19	1	0	1
Class II	JU1200	L4+56	20	17	0	17
Class I	QG2873	L4+56	1	10	0	10
Class I	QG2873	L4+56	2	12	0	12
Class I	QG2873	L4+56	3	19	0	19
Class I	QG2873	L4+56	4	17	0	17
Class I	QG2873	L4+56	5	8	0	8
Class I	QG2873	L4+56	6	18	0	18
Class I	QG2873	L4+56	7	13	0	13
Class I	QG2873	L4+56	8	12	0	12
Class I	QG2873	L4+56	9	12	0	12
Class I	QG2873	L4+56	10	10	0	10
Class I	QG2873	L4+56	11	11	0	11
Class I	QG2873	L4+56	12	2	0	2
Class I	QG2873	L4+56	13	5	0	5
Class I	QG2873	L4+56	14	7	0	7
Class I	QG2873	L4+56	15	6	0	6
Class I	QG2873	L4+56	16	0	0	0
Class I	QG2873	L4+56	17	5	0	5
Class I	QG2873	L4+56	18	16	0	16
Class I	QG2873	L4+56	19	5	0	5
Class I	QG2873	L4+56	20	1	0	1
Class I	JU3166	L4+56	1	10	0	10
Class I	JU3166	L4+56	2	1	0	1
Class I	JU3166	L4+56	3	11	0	11
Class I	JU3166	L4+56	4	3	0	3
Class I	JU3166	L4+56	5	3	0	3
Class I	JU3166	L4+56	6	2	0	2
Class I	JU3166	L4+56	7	2	0	2
Class I	JU3166	L4+56	8	1	0	1
Class I	JU3166	L4+56	9	14	0	14
Class I	JU3166	L4+56	10	8	0	8
Class I	JU3166	L4+56	11	0	0	0
Class I	JU3166	L4+56	12	0	0	0
Class I	JU3166	L4+56	13	0	0	0
Class I	JU3166	L4+56	14	0	0	0
Class I	JU3166	L4+56	15	0	0	0
Class I	JU3166	L4+56	16	1	0	1
Class I	JU3166	L4+56	17	0	0	0
Class I	JU3166	L4+56	18	1	0	1
Class I	JU3166	L4+56	19	0	0	0
Class I	JU3166	L4+56	20	0	0	0
Class III A	JU440	L4+56	1	0	0	0
Class III A	JU440	L4+56	2	3	0	3
Class III A	JU440	L4+56	3	7	0	7
Class III A	JU440	L4+56	4	9	0	9
Class III A	JU440	L4+56	5	0	0	0
Class III A	JU440	L4+56	7	14	0	14
Class III A	JU440	L4+56	8	6	0	6
Class III A	JU440	L4+56	9	13	0	13
Class III A	JU440	L4+56	10	0	0	0
Class III A	JU440	L4+56	11	16	0	16
Class III A	JU440	L4+56	12	7	0	7
Class III A	JU440	L4+56	13	0	0	0
Class III A	JU440	L4+56	14	8	0	8
Class III A	JU440	L4+56	15	0	0	0
Class III A	JU440	L4+56	16	0	0	0
Class III A	JU440	L4+56	17	0	0	0
Class III A	JU440	L4+56	18	0	0	0
Class III A	JU440	L4+56	19	0	0	0
Class III A	JU440	L4+56	20	2	0	2
Class III A	JU830	L4+56	1	0	0	0
Class III A	JU830	L4+56	2	0	0	0
Class III A	JU830	L4+56	3	0	0	0
Class III A	JU830	L4+56	4	2	0	2
Class III A	JU830	L4+56	5	0	0	0
Class III A	JU830	L4+56	6	0	0	0
Class III A	JU830	L4+56	8	1	0	1
Class III A	JU830	L4+56	11	0	0	0
Class III A	JU830	L4+56	13	0	0	0
Class III A	JU830	L4+56	14	0	0	0
Class III A	JU830	L4+56	15	0	0	0
Class III A	JU830	L4+56	16	0	0	0
Class III A	JU830	L4+56	17	0	0	0
Class III A	JU830	L4+56	18	0	0	0
Class III A	JU830	L4+56	19	0	0	0
Class III A	JU830	L4+56	20	0	0	0
Class III A	JU2829	L4+56	1	0	0	0
Class III A	JU2829	L4+56	2	0	0	0
Class III A	JU2829	L4+56	5	0	0	0
Class III A	JU2829	L4+56	6	2	0	2
Class III A	JU2829	L4+56	7	0	0	0
Class III A	JU2829	L4+56	8	0	0	0
Class III A	JU2829	L4+56	9	9	0	9
Class III A	JU2829	L4+56	10	1	0	1
Class III A	JU2829	L4+56	11	0	0	0
Class III A	JU2829	L4+56	12	0	0	0
Class III A	JU2829	L4+56	13	0	0	0
Class III A	JU2829	L4+56	14	0	0	0
Class III A	JU2829	L4+56	15	0	0	0
Class III A	JU2829	L4+56	16	0	0	0
Class III A	JU2829	L4+56	17	0	0	0
Class III A	JU2829	L4+56	18	0	0	0
Class III A	JU2829	L4+56	19	0	0	0
Class III A	JU2829	L4+56	20	0	0	0
Class III A	ED3005	L4+56	1	6	0	6
Class III A	ED3005	L4+56	2	7	0	7
Class III A	ED3005	L4+56	4	0	0	0
Class III A	ED3005	L4+56	6	2	0	2
Class III A	ED3005	L4+56	8	2	0	2
Class III A	ED3005	L4+56	9	9	0	9
Class III A	ED3005	L4+56	10	0	0	0
Class III A	ED3005	L4+56	11	5	0	5
Class III A	ED3005	L4+56	12	0	0	0
Class III A	ED3005	L4+56	13	8	0	8
Class III A	ED3005	L4+56	14	0	0	0
Class III A	ED3005	L4+56	15	0	0	0
Class III A	ED3005	L4+56	16	0	0	0
Class III A	ED3005	L4+56	17	0	0	0
Class III A	ED3005	L4+56	18	0	0	0
Class III A	ED3005	L4+56	19	0	0	0
Class III A	ED3005	L4+56	20	3	0	3
Class III A	NIC1786	L4+56	1	0	0	0
Class III A	NIC1786	L4+56	3	0	0	0
Class III A	NIC1786	L4+56	7	4	0	4
Class III A	NIC1786	L4+56	8	0	0	0
Class III A	NIC1786	L4+56	10	0	0	0
Class III A	NIC1786	L4+56	11	0	0	0
Class III A	NIC1786	L4+56	12	0	0	0
Class III A	NIC1786	L4+56	13	4	0	4
Class III A	NIC1786	L4+56	14	0	0	0
Class III A	NIC1786	L4+56	15	0	0	0
Class III A	NIC1786	L4+56	16	7	0	7
Class III A	NIC1786	L4+56	17	0	0	0
Class III A	NIC1786	L4+56	18	0	0	0
Class III A	NIC1786	L4+56	19	0	0	0
Class III A	NIC1786	L4+56	20	0	0	0
Class III B	JU751	L4+56	2	0	0	0
Class III B	JU751	L4+56	13	8	0	8
Class III B	JU751	L4+56	20	0	0	0
Class III B	JU2587	L4+56	2	1	0	1
Class III B	JU2587	L4+56	3	0	0	0
Class III B	JU2587	L4+56	10	0	0	0
Class III B	JU2587	L4+56	11	0	0	0
Class III B	JU2587	L4+56	12	0	0	0
Class III B	JU2587	L4+56	13	0	0	0
Class III B	JU2587	L4+56	15	0	0	0
Class III B	JU2587	L4+56	16	0	0	0
Class III B	JU2587	L4+56	17	0	0	0
Class III B	JU2587	L4+56	18	0	0	0
Class III B	JU2587	L4+56	19	0	0	0
Class III B	JU2587	L4+56	20	0	0	0
Class III B	NIC1832	L4+56	2	1	0	1
Class III B	NIC1832	L4+56	3	0	0	0
Class III B	NIC1832	L4+56	6	0	0	0
Class III B	NIC1832	L4+56	7	0	0	0
Class III B	NIC1832	L4+56	8	0	0	0
Class III B	NIC1832	L4+56	11	0	0	0
Class III B	NIC1832	L4+56	12	0	0	0
Class III B	NIC1832	L4+56	13	0	0	0
Class III B	NIC1832	L4+56	14	0	0	0
Class III B	NIC1832	L4+56	15	0	0	0
Class III B	NIC1832	L4+56	16	0	0	0
Class III B	NIC1832	L4+56	18	0	0	0
Class III B	NIC1832	L4+56	19	0	0	0
Class II	N2	L4+72	1	0	0	0
Class II	N2	L4+72	2	0	0	0
Class II	N2	L4+72	3	0	0	0
Class II	N2	L4+72	4	0	0	0
Class II	N2	L4+72	5	0	0	0
Class II	N2	L4+72	6	0	0	0
Class II	N2	L4+72	7	1	0	1
Class II	N2	L4+72	8	0	0	0
Class II	N2	L4+72	9	3	0	3
Class II	N2	L4+72	10	2	0	2
Class II	N2	L4+72	11	1	0	1
Class II	N2	L4+72	12	0	0	0
Class II	N2	L4+72	13	6	0	6
Class II	N2	L4+72	14	1	0	1
Class II	N2	L4+72	15	0	0	0
Class II	N2	L4+72	16	0	0	0
Class II	N2	L4+72	17	0	0	0
Class II	N2	L4+72	18	3	0	3
Class II	N2	L4+72	19	0	0	0
Class II	N2	L4+72	20	0	0	0
Class II	QX1430	L4+72	1	0	0	0
Class II	QX1430	L4+72	2	0	0	0
Class II	QX1430	L4+72	3	0	0	0
Class II	QX1430	L4+72	4	0	0	0
Class II	QX1430	L4+72	5	1	0	1
Class II	QX1430	L4+72	6	0	0	0
Class II	QX1430	L4+72	7	0	0	0
Class II	QX1430	L4+72	8	1	0	1
Class II	QX1430	L4+72	9	0	0	0
Class II	QX1430	L4+72	11	2	0	2
Class II	QX1430	L4+72	12	0	0	0
Class II	QX1430	L4+72	13	0	0	0
Class II	QX1430	L4+72	14	0	0	0
Class II	QX1430	L4+72	15	0	0	0
Class II	QX1430	L4+72	16	0	0	0
Class II	QX1430	L4+72	17	0	0	0
Class II	QX1430	L4+72	18	0	0	0
Class II	QX1430	L4+72	19	0	0	0
Class II	QX1430	L4+72	20	0	0	0
Class II	CB4856	L4+72	1	0	0	0
Class II	CB4856	L4+72	2	0	0	0
Class II	CB4856	L4+72	3	0	0	0
Class II	CB4856	L4+72	4	0	0	0
Class II	CB4856	L4+72	5	0	0	0
Class II	CB4856	L4+72	6	0	0	0
Class II	CB4856	L4+72	7	0	0	0
Class II	CB4856	L4+72	8	0	0	0
Class II	CB4856	L4+72	9	0	0	0
Class II	CB4856	L4+72	11	0	0	0
Class II	CB4856	L4+72	12	0	0	0
Class II	CB4856	L4+72	13	0	0	0
Class II	CB4856	L4+72	14	0	0	0
Class II	CB4856	L4+72	15	0	0	0
Class II	CB4856	L4+72	16	0	0	0
Class II	CB4856	L4+72	17	0	0	0
Class II	CB4856	L4+72	18	0	0	0
Class II	CB4856	L4+72	19	0	0	0
Class II	CB4856	L4+72	20	0	0	0
Class II	JU1200	L4+72	1	0	0	0
Class II	JU1200	L4+72	2	0	0	0
Class II	JU1200	L4+72	3	0	0	0
Class II	JU1200	L4+72	4	0	0	0
Class II	JU1200	L4+72	5	0	0	0
Class II	JU1200	L4+72	6	0	0	0
Class II	JU1200	L4+72	7	0	0	0
Class II	JU1200	L4+72	8	0	0	0
Class II	JU1200	L4+72	9	0	0	0
Class II	JU1200	L4+72	10	0	0	0
Class II	JU1200	L4+72	11	0	0	0
Class II	JU1200	L4+72	12	0	0	0
Class II	JU1200	L4+72	13	0	0	0
Class II	JU1200	L4+72	14	0	0	0
Class II	JU1200	L4+72	15	0	0	0
Class II	JU1200	L4+72	16	0	0	0
Class II	JU1200	L4+72	17	0	0	0
Class II	JU1200	L4+72	18	1	0	1
Class II	JU1200	L4+72	19	0	0	0
Class II	JU1200	L4+72	20	0	0	0
Class I	QG2873	L4+72	1	0	0	0
Class I	QG2873	L4+72	2	5	0	5
Class I	QG2873	L4+72	3	1	0	1
Class I	QG2873	L4+72	4	0	0	0
Class I	QG2873	L4+72	5	1	0	1
Class I	QG2873	L4+72	6	0	0	0
Class I	QG2873	L4+72	7	0	0	0
Class I	QG2873	L4+72	8	7	0	7
Class I	QG2873	L4+72	9	0	0	0
Class I	QG2873	L4+72	10	2	0	2
Class I	QG2873	L4+72	11	0	0	0
Class I	QG2873	L4+72	12	0	0	0
Class I	QG2873	L4+72	13	0	0	0
Class I	QG2873	L4+72	14	0	0	0
Class I	QG2873	L4+72	15	0	0	0
Class I	QG2873	L4+72	16	0	0	0
Class I	QG2873	L4+72	17	1	0	1
Class I	QG2873	L4+72	18	0	0	0
Class I	QG2873	L4+72	19	0	0	0
Class I	QG2873	L4+72	20	0	0	0
Class I	JU3166	L4+72	1	0	0	0
Class I	JU3166	L4+72	2	0	0	0
Class I	JU3166	L4+72	3	0	0	0
Class I	JU3166	L4+72	4	1	0	1
Class I	JU3166	L4+72	5	0	0	0
Class I	JU3166	L4+72	6	0	0	0
Class I	JU3166	L4+72	7	0	0	0
Class I	JU3166	L4+72	8	0	0	0
Class I	JU3166	L4+72	9	0	0	0
Class I	JU3166	L4+72	10	1	0	1
Class I	JU3166	L4+72	11	0	0	0
Class I	JU3166	L4+72	12	0	0	0
Class I	JU3166	L4+72	13	0	0	0
Class I	JU3166	L4+72	14	0	0	0
Class I	JU3166	L4+72	15	0	0	0
Class I	JU3166	L4+72	16	0	0	0
Class I	JU3166	L4+72	17	0	0	0
Class I	JU3166	L4+72	18	15	0	15
Class I	JU3166	L4+72	19	0	0	0
Class I	JU3166	L4+72	20	0	0	0
Class III A	JU440	L4+72	1	3	0	3
Class III A	JU440	L4+72	2	0	0	0
Class III A	JU440	L4+72	3	0	0	0
Class III A	JU440	L4+72	4	0	0	0
Class III A	JU440	L4+72	5	0	0	0
Class III A	JU440	L4+72	6	0	0	0
Class III A	JU440	L4+72	7	0	0	0
Class III A	JU440	L4+72	8	0	0	0
Class III A	JU440	L4+72	9	0	0	0
Class III A	JU440	L4+72	10	0	0	0
Class III A	JU440	L4+72	11	0	0	0
Class III A	JU440	L4+72	12	0	0	0
Class III A	JU440	L4+72	13	0	0	0
Class III A	JU440	L4+72	14	0	0	0
Class III A	JU440	L4+72	15	0	0	0
Class III A	JU440	L4+72	16	0	0	0
Class III A	JU440	L4+72	17	0	0	0
Class III A	JU440	L4+72	18	0	0	0
Class III A	JU440	L4+72	19	0	0	0
Class III A	JU440	L4+72	20	0	0	0
Class III A	JU830	L4+72	1	0	0	0
Class III A	JU830	L4+72	2	0	0	0
Class III A	JU830	L4+72	3	0	0	0
Class III A	JU830	L4+72	4	0	0	0
Class III A	JU830	L4+72	5	0	0	0
Class III A	JU830	L4+72	6	0	0	0
Class III A	JU830	L4+72	7	0	0	0
Class III A	JU830	L4+72	8	0	0	0
Class III A	JU830	L4+72	9	0	0	0
Class III A	JU830	L4+72	10	9	0	9
Class III A	JU830	L4+72	12	0	0	0
Class III A	JU830	L4+72	13	0	0	0
Class III A	JU830	L4+72	14	0	0	0
Class III A	JU830	L4+72	15	0	0	0
Class III A	JU830	L4+72	16	0	0	0
Class III A	JU830	L4+72	17	0	0	0
Class III A	JU830	L4+72	18	0	0	0
Class III A	JU830	L4+72	19	0	0	0
Class III A	JU830	L4+72	20	0	0	0
Class III A	JU2829	L4+72	1	0	0	0
Class III A	JU2829	L4+72	2	0	0	0
Class III A	JU2829	L4+72	3	0	0	0
Class III A	JU2829	L4+72	4	0	0	0
Class III A	JU2829	L4+72	5	0	0	0
Class III A	JU2829	L4+72	6	0	0	0
Class III A	JU2829	L4+72	7	0	0	0
Class III A	JU2829	L4+72	8	0	0	0
Class III A	JU2829	L4+72	11	0	0	0
Class III A	JU2829	L4+72	12	0	0	0
Class III A	JU2829	L4+72	15	0	0	0
Class III A	JU2829	L4+72	16	0	0	0
Class III A	JU2829	L4+72	17	0	0	0
Class III A	JU2829	L4+72	18	0	0	0
Class III A	JU2829	L4+72	19	0	0	0
Class III A	JU2829	L4+72	20	0	0	0
Class III A	ED3005	L4+72	1	0	0	0
Class III A	ED3005	L4+72	2	0	0	0
Class III A	ED3005	L4+72	3	0	0	0
Class III A	ED3005	L4+72	4	0	0	0
Class III A	ED3005	L4+72	5	0	0	0
Class III A	ED3005	L4+72	6	0	0	0
Class III A	ED3005	L4+72	8	0	0	0
Class III A	ED3005	L4+72	9	0	0	0
Class III A	ED3005	L4+72	10	0	0	0
Class III A	ED3005	L4+72	11	0	0	0
Class III A	ED3005	L4+72	12	0	0	0
Class III A	ED3005	L4+72	13	0	0	0
Class III A	ED3005	L4+72	14	0	0	0
Class III A	ED3005	L4+72	15	0	0	0
Class III A	ED3005	L4+72	16	0	0	0
Class III A	ED3005	L4+72	17	0	0	0
Class III A	ED3005	L4+72	18	0	0	0
Class III A	ED3005	L4+72	19	0	0	0
Class III A	ED3005	L4+72	20	0	0	0
Class III A	NIC1786	L4+72	1	0	0	0
Class III A	NIC1786	L4+72	2	0	0	0
Class III A	NIC1786	L4+72	3	0	0	0
Class III A	NIC1786	L4+72	4	0	0	0
Class III A	NIC1786	L4+72	5	0	0	0
Class III A	NIC1786	L4+72	6	1	0	1
Class III A	NIC1786	L4+72	7	0	0	0
Class III A	NIC1786	L4+72	8	0	0	0
Class III A	NIC1786	L4+72	9	0	0	0
Class III A	NIC1786	L4+72	10	0	0	0
Class III A	NIC1786	L4+72	11	0	0	0
Class III A	NIC1786	L4+72	12	0	0	0
Class III A	NIC1786	L4+72	13	0	0	0
Class III A	NIC1786	L4+72	14	0	0	0
Class III A	NIC1786	L4+72	15	0	0	0
Class III A	NIC1786	L4+72	16	0	0	0
Class III A	NIC1786	L4+72	17	0	0	0
Class III A	NIC1786	L4+72	18	0	0	0
Class III A	NIC1786	L4+72	19	0	0	0
Class III A	NIC1786	L4+72	20	0	0	0
Class III B	JU751	L4+72	2	0	0	0
Class III B	JU751	L4+72	3	0	0	0
Class III B	JU751	L4+72	4	0	0	0
Class III B	JU751	L4+72	5	0	0	0
Class III B	JU751	L4+72	7	0	0	0
Class III B	JU751	L4+72	8	0	0	0
Class III B	JU751	L4+72	9	0	0	0
Class III B	JU751	L4+72	10	0	0	0
Class III B	JU751	L4+72	11	0	0	0
Class III B	JU751	L4+72	12	2	0	2
Class III B	JU751	L4+72	13	0	0	0
Class III B	JU751	L4+72	14	1	0	1
Class III B	JU751	L4+72	15	0	0	0
Class III B	JU751	L4+72	16	0	0	0
Class III B	JU751	L4+72	17	0	0	0
Class III B	JU751	L4+72	18	0	0	0
Class III B	JU751	L4+72	19	0	0	0
Class III B	JU751	L4+72	20	0	0	0
Class III B	JU2593	L4+72	1	0	0	0
Class III B	JU2587	L4+72	1	1	0	1
Class III B	JU2587	L4+72	2	0	0	0
Class III B	JU2587	L4+72	3	0	0	0
Class III B	JU2587	L4+72	4	0	0	0
Class III B	JU2587	L4+72	5	0	0	0
Class III B	JU2587	L4+72	6	0	0	0
Class III B	JU2587	L4+72	8	0	0	0
Class III B	JU2587	L4+72	9	0	0	0
Class III B	JU2587	L4+72	10	0	0	0
Class III B	JU2587	L4+72	11	0	0	0
Class III B	JU2587	L4+72	12	0	0	0
Class III B	JU2587	L4+72	14	0	0	0
Class III B	JU2587	L4+72	15	0	0	0
Class III B	JU2587	L4+72	16	0	0	0
Class III B	JU2587	L4+72	17	0	0	0
Class III B	JU2587	L4+72	18	0	0	0
Class III B	JU2587	L4+72	19	0	0	0
Class III B	JU2587	L4+72	20	0	0	0
Class III B	NIC1832	L4+72	1	0	0	0
Class III B	NIC1832	L4+72	2	0	0	0
Class III B	NIC1832	L4+72	3	0	0	0
Class III B	NIC1832	L4+72	4	0	0	0
Class III B	NIC1832	L4+72	5	0	0	0
Class III B	NIC1832	L4+72	6	0	0	0
Class III B	NIC1832	L4+72	7	0	0	0
Class III B	NIC1832	L4+72	8	0	0	0
Class III B	NIC1832	L4+72	9	0	0	0
Class III B	NIC1832	L4+72	12	0	0	0
Class III B	NIC1832	L4+72	13	0	0	0
Class III B	NIC1832	L4+72	14	0	0	0
Class III B	NIC1832	L4+72	15	3	0	3
Class III B	NIC1832	L4+72	16	0	0	0
Class III B	NIC1832	L4+72	17	0	0	0
Class III B	NIC1832	L4+72	18	0	0	0
Class III B	NIC1832	L4+72	19	0	0	0
Class III B	NIC1832	L4+72	20	0	0	0
Class III A	ED3005	L4+24	13	14	1	15
Class III A	ED3005	L4+24	14	16	1	17
Class III A	NIC1786	L4+24	13	17	1	18
Class III A	NIC1786	L4+24	19	13	1	14
Class III B	JU751	L4+24	14	8	1	9
Class III B	JU2593	L4+24	6	2	1	3
Class III B	JU2593	L4+24	10	0	1	1
Class III B	JU2587	L4+24	5	7	1	8
Class III B	NIC1832	L4+24	2	12	1	13
Class III B	NIC1832	L4+24	3	12	1	13
Class III B	NIC1832	L4+24	9	10	1	11
Class II	N2	L4+30	14	17	1	18
Class II	N2	L4+30	17	16	1	17
Class II	N2	L4+30	20	26	1	27
Class II	CB4856	L4+30	1	21	1	22
Class II	CB4856	L4+30	3	15	1	16
Class II	CB4856	L4+30	14	20	1	21
Class II	CB4856	L4+30	17	20	1	21
Class II	JU1200	L4+30	2	20	1	21
Class II	JU1200	L4+30	10	14	1	15
Class II	JU1200	L4+30	14	21	1	22
Class I	QG2873	L4+30	12	13	1	14
Class I	QG2873	L4+30	15	18	1	19
Class I	JU3166	L4+30	12	18	1	19
Class III A	JU440	L4+30	7	20	1	21
Class III A	JU440	L4+30	15	24	1	25
Class III A	JU440	L4+30	17	24	1	25
Class III A	JU440	L4+30	19	23	1	24
Class III A	JU830	L4+30	1	13	1	14
Class III A	JU830	L4+30	2	21	1	22
Class III A	JU830	L4+30	13	16	1	17
Class III A	JU830	L4+30	16	14	1	15
Class III A	JU830	L4+30	18	18	1	19
Class III A	JU2829	L4+30	10	15	1	16
Class III A	JU2829	L4+30	13	16	1	17
Class III A	ED3005	L4+30	3	15	1	16
Class III A	ED3005	L4+30	7	19	1	20
Class III A	ED3005	L4+30	8	18	1	19
Class III A	ED3005	L4+30	10	9	1	10
Class III A	ED3005	L4+30	13	22	1	23
Class III A	ED3005	L4+30	20	21	1	22
Class III A	NIC1786	L4+30	12	20	1	21
Class III A	NIC1786	L4+30	16	15	1	16
Class III B	JU751	L4+30	2	4	1	5
Class III B	JU751	L4+30	5	11	1	12
Class III B	JU751	L4+30	7	10	1	11
Class III B	JU751	L4+30	14	12	1	13
Class III B	JU751	L4+30	19	11	1	12
Class III B	JU2593	L4+30	1	10	1	11
Class III B	JU2593	L4+30	12	2	1	3
Class III B	JU2593	L4+30	15	0	1	1
Class III B	JU2587	L4+30	1	10	1	11
Class III B	JU2587	L4+30	13	9	1	10
Class III B	JU2587	L4+30	15	8	1	9
Class III B	JU2587	L4+30	17	7	1	8
Class III B	NIC1832	L4+30	6	6	1	7
Class III B	NIC1832	L4+30	14	9	1	10
Class II	N2	L4+48	14	23	1	24
Class II	N2	L4+48	15	22	1	23
Class II	CB4856	L4+48	7	20	1	21
Class II	CB4856	L4+48	8	28	1	29
Class III A	JU440	L4+48	5	17	1	18
Class III A	JU440	L4+48	6	23	1	24
Class III A	JU830	L4+48	2	1	1	2
Class III A	JU830	L4+48	3	0	1	1
Class III A	JU830	L4+48	4	0	1	1
Class III A	JU830	L4+48	6	15	1	16
Class III A	JU830	L4+48	9	0	1	1
Class III A	JU830	L4+48	13	3	1	4
Class III A	JU830	L4+48	14	5	1	6
Class III A	JU830	L4+48	16	4	1	5
Class III A	JU830	L4+48	17	4	1	5
Class III A	JU2829	L4+48	11	0	1	1
Class III A	ED3005	L4+48	1	19	1	20
Class III A	ED3005	L4+48	3	8	1	9
Class III A	NIC1786	L4+48	1	9	1	10
Class III A	NIC1786	L4+48	3	7	1	8
Class III A	NIC1786	L4+48	12	5	1	6
Class III A	NIC1786	L4+48	17	1	1	2
Class III B	JU751	L4+48	1	3	1	4
Class III B	JU751	L4+48	2	4	1	5
Class III B	JU751	L4+48	3	1	1	2
Class III B	JU751	L4+48	8	16	1	17
Class III B	JU751	L4+48	9	7	1	8
Class III B	JU751	L4+48	14	6	1	7
Class III B	JU751	L4+48	16	5	1	6
Class III B	JU751	L4+48	17	7	1	8
Class III B	JU2593	L4+48	8	3	1	4
Class III B	JU2593	L4+48	9	0	1	1
Class III B	JU2593	L4+48	10	3	1	4
Class III B	JU2593	L4+48	12	4	1	5
Class III B	JU2593	L4+48	14	11	1	12
Class III B	JU2593	L4+48	17	2	1	3
Class III B	JU2593	L4+48	20	5	1	6
Class III B	JU2587	L4+48	12	0	1	1
Class III B	JU2587	L4+48	16	0	1	1
Class III B	JU2587	L4+48	19	2	1	3
Class III B	NIC1832	L4+48	3	0	1	1
Class III B	NIC1832	L4+48	4	0	1	1
Class III B	NIC1832	L4+48	12	0	1	1
Class III B	NIC1832	L4+48	13	0	1	1
Class III B	NIC1832	L4+48	14	0	1	1
Class III B	NIC1832	L4+48	19	0	1	1
Class II	N2	L4+56	1	6	1	7
Class II	N2	L4+56	6	10	1	11
Class II	N2	L4+56	7	13	1	14
Class II	CB4856	L4+56	2	8	1	9
Class II	JU1200	L4+56	2	0	1	1
Class II	JU1200	L4+56	10	1	1	2
Class III A	JU440	L4+56	6	12	1	13
Class III A	JU830	L4+56	7	0	1	1
Class III A	JU830	L4+56	9	0	1	1
Class III A	JU830	L4+56	10	0	1	1
Class III A	JU830	L4+56	12	0	1	1
Class III A	JU2829	L4+56	3	1	1	2
Class III A	JU2829	L4+56	4	3	1	4
Class III A	ED3005	L4+56	3	2	1	3
Class III A	ED3005	L4+56	5	2	1	3
Class III A	ED3005	L4+56	7	7	1	8
Class III A	NIC1786	L4+56	2	0	1	1
Class III A	NIC1786	L4+56	5	0	1	1
Class III A	NIC1786	L4+56	6	2	1	3
Class III A	NIC1786	L4+56	9	0	1	1
Class III B	JU751	L4+56	1	2	1	3
Class III B	JU751	L4+56	3	2	1	3
Class III B	JU751	L4+56	4	0	1	1
Class III B	JU751	L4+56	5	0	1	1
Class III B	JU751	L4+56	7	4	1	5
Class III B	JU751	L4+56	8	8	1	9
Class III B	JU751	L4+56	9	0	1	1
Class III B	JU751	L4+56	15	0	1	1
Class III B	JU751	L4+56	16	0	1	1
Class III B	JU751	L4+56	17	1	1	2
Class III B	JU751	L4+56	19	0	1	1
Class III B	JU2593	L4+56	3	0	1	1
Class III B	JU2593	L4+56	6	0	1	1
Class III B	JU2593	L4+56	14	0	1	1
Class III B	JU2587	L4+56	7	0	1	1
Class III B	NIC1832	L4+56	1	5	1	6
Class III B	NIC1832	L4+56	5	1	1	2
Class III B	NIC1832	L4+56	9	0	1	1
Class III B	NIC1832	L4+56	17	0	1	1
Class II	QX1430	L4+72	10	7	1	8
Class III A	ED3005	L4+72	7	0	1	1
Class III B	JU751	L4+72	1	4	1	5
Class III B	JU751	L4+72	6	0	1	1
Class III B	JU2587	L4+72	7	0	1	1
Class III B	JU2587	L4+72	13	0	1	1
Class III B	NIC1832	L4+72	10	0	1	1
Class III A	JU2829	L4+24	20	12	2	14
Class III B	JU2587	L4+24	8	6	2	8
Class III A	JU440	L4+30	14	23	2	25
Class III A	ED3005	L4+30	14	17	2	19
Class III A	NIC1786	L4+30	15	19	2	21
Class III B	NIC1832	L4+30	15	17	2	19
Class III B	NIC1832	L4+30	17	17	2	19
Class III A	JU440	L4+48	3	25	2	27
Class III A	JU2829	L4+48	2	6	2	8
Class III B	JU751	L4+48	12	0	2	2
Class III B	JU751	L4+48	13	5	2	7
Class III B	JU2593	L4+48	2	7	2	9
Class III B	JU2593	L4+48	4	0	2	2
Class III B	JU2587	L4+48	9	1	2	3
Class III B	JU2587	L4+48	10	4	2	6
Class III B	JU2587	L4+48	11	0	2	2
Class III B	JU2587	L4+48	13	0	2	2
Class III B	JU2587	L4+48	17	0	2	2
Class III B	NIC1832	L4+48	11	0	2	2
Class III B	NIC1832	L4+48	16	0	2	2
Class III B	NIC1832	L4+48	17	0	2	2
Class III B	NIC1832	L4+48	20	0	2	2
Class II	QX1430	L4+56	5	4	2	6
Class II	CB4856	L4+56	4	2	2	4
Class II	CB4856	L4+56	10	15	2	17
Class III A	NIC1786	L4+56	4	0	2	2
Class III B	JU751	L4+56	10	8	2	10
Class III B	JU751	L4+56	11	1	2	3
Class III B	JU751	L4+56	12	3	2	5
Class III B	JU751	L4+56	18	1	2	3
Class III B	JU2593	L4+56	15	0	2	2
Class III B	JU2587	L4+56	1	0	2	2
Class III B	JU2587	L4+56	5	0	2	2
Class III B	JU2587	L4+56	8	0	2	2
Class III B	JU2587	L4+56	14	0	2	2
Class III B	NIC1832	L4+56	4	0	2	2
Class III B	NIC1832	L4+56	10	0	2	2
Class III B	NIC1832	L4+56	20	0	2	2
Class III A	NIC1786	L4+30	17	19	3	22
Class III B	JU751	L4+48	20	1	3	4
Class III B	JU2593	L4+48	3	0	3	3
Class III B	JU2587	L4+48	4	1	3	4
Class III B	JU2587	L4+48	5	1	3	4
Class III B	NIC1832	L4+48	2	0	3	3
Class III B	JU2593	L4+56	11	0	3	3
Class III B	JU2587	L4+56	4	0	3	3
Class III B	JU2587	L4+56	6	0	3	3
Class III B	JU2587	L4+56	9	0	3	3
Class III A	JU2829	L4+24	17	3	4	7
Class III A	JU2829	L4+30	18	2	4	6
Class III A	ED3005	L4+30	11	14	4	18
Class III A	JU830	L4+48	1	0	4	4
Class III B	JU751	L4+48	11	8	4	12
Class III B	JU2593	L4+48	1	4	4	8
Class III B	JU2593	L4+48	7	0	4	4
Class III B	JU2593	L4+48	18	0	4	4
Class III B	JU751	L4+56	14	0	4	4
Class III B	JU751	L4+56	6	2	7	9
Class III B	JU2593	L4+56	4	0	8	8
Class III B	JU2593	L4+48	11	0	11	11
Class III B	JU2593	L4+56	1	0	15	15
Class III B	JU2593	L4+48	5	0	22	22
Class III B	JU2593	L4+56	2	0	0	0
Class III B	JU2593	L4+56	5	0	0	0
Class III B	JU2593	L4+56	7	0	0	0
Class III B	JU2593	L4+56	8	0	0	0
Class III B	JU2593	L4+56	9	0	0	0
Class III B	JU2593	L4+56	10	0	0	0
Class III B	JU2593	L4+56	12	0	0	0
Class III B	JU2593	L4+56	13	0	0	0
Class III B	JU2593	L4+56	16	0	0	0
Class III B	JU2593	L4+56	17	0	0	0
Class III B	JU2593	L4+56	18	0	0	0
