# Supplementary material for: Natural variation in the Caenorhabditis elegans egg-laying circuit modulates an intergenerational fitness trade-off
Source: eLife. 2024 Apr 2;12:RP88253. doi: 10.7554/eLife.88253 (PMC10987095; doi:10.7554/eLife.88253)
Supplement: Figure 5—source data 1. [file elife-88253-fig5-data1.xlsx]

## Sheet: Figure 5 - Raw data
Strain	Individual	Time point (minutes)	Positive egg-laying event (Yes=1, No=0)	Number of eggs laid	Selected individual shown in Figure 5B and Figure 5-supplement 1A
CB4856	1	5	0	0	No
CB4856	1	10	0	0	No
CB4856	1	15	0	0	No
CB4856	1	20	0	0	No
CB4856	1	25	0	0	No
CB4856	1	30	0	0	No
CB4856	1	35	0	0	No
CB4856	1	40	0	0	No
CB4856	1	45	0	0	No
CB4856	1	50	1	1	No
CB4856	1	55	0	0	No
CB4856	1	60	1	2	No
CB4856	1	65	0	0	No
CB4856	1	70	0	0	No
CB4856	1	75	0	0	No
CB4856	1	80	0	0	No
CB4856	1	85	1	2	No
CB4856	1	90	0	0	No
CB4856	1	95	0	0	No
CB4856	1	100	0	0	No
CB4856	1	105	1	2	No
CB4856	1	110	0	0	No
CB4856	1	115	0	0	No
CB4856	1	120	0	0	No
CB4856	1	125	0	0	No
CB4856	1	130	0	0	No
CB4856	1	135	1	1	No
CB4856	1	140	1	1	No
CB4856	1	145	1	2	No
CB4856	1	150	0	0	No
CB4856	1	155	0	0	No
CB4856	1	160	0	0	No
CB4856	1	165	0	0	No
CB4856	1	170	1	1	No
CB4856	1	175	1	3	No
CB4856	1	180	0	0	No
ED3005	1	5	0	0	Yes
ED3005	1	10	0	0	Yes
ED3005	1	15	0	0	Yes
ED3005	1	20	0	0	Yes
ED3005	1	25	0	0	Yes
ED3005	1	30	1	1	Yes
ED3005	1	35	0	0	Yes
ED3005	1	40	0	0	Yes
ED3005	1	45	0	0	Yes
ED3005	1	50	0	0	Yes
ED3005	1	55	1	1	Yes
ED3005	1	60	0	0	Yes
ED3005	1	65	1	1	Yes
ED3005	1	70	0	0	Yes
ED3005	1	75	0	0	Yes
ED3005	1	80	1	2	Yes
ED3005	1	85	1	2	Yes
ED3005	1	90	0	0	Yes
ED3005	1	95	0	0	Yes
ED3005	1	100	0	0	Yes
ED3005	1	105	1	1	Yes
ED3005	1	110	0	0	Yes
ED3005	1	115	1	2	Yes
ED3005	1	120	0	0	Yes
ED3005	1	125	0	0	Yes
ED3005	1	130	0	0	Yes
ED3005	1	135	1	2	Yes
ED3005	1	140	1	1	Yes
ED3005	1	145	1	1	Yes
ED3005	1	150	1	1	Yes
ED3005	1	155	1	2	Yes
ED3005	1	160	0	0	Yes
ED3005	1	165	1	1	Yes
ED3005	1	170	0	0	Yes
ED3005	1	175	0	0	Yes
ED3005	1	180	0	0	Yes
JU1200	1	5	0	0	No
JU1200	1	10	1	2	No
JU1200	1	15	0	0	No
JU1200	1	20	0	0	No
JU1200	1	25	0	0	No
JU1200	1	30	0	0	No
JU1200	1	35	0	0	No
JU1200	1	40	1	2	No
JU1200	1	45	0	0	No
JU1200	1	50	0	0	No
JU1200	1	55	1	5	No
JU1200	1	60	1	1	No
JU1200	1	65	0	0	No
JU1200	1	70	0	0	No
JU1200	1	75	1	1	No
JU1200	1	80	1	4	No
JU1200	1	85	0	0	No
JU1200	1	90	0	0	No
JU1200	1	95	0	0	No
JU1200	1	100	0	0	No
JU1200	1	105	1	7	No
JU1200	1	110	0	0	No
JU1200	1	115	0	0	No
JU1200	1	120	0	0	No
JU1200	1	125	0	0	No
JU1200	1	130	0	0	No
JU1200	1	135	0	0	No
JU1200	1	140	1	3	No
JU1200	1	145	0	0	No
JU1200	1	150	0	0	No
JU1200	1	155	0	0	No
JU1200	1	160	1	2	No
JU1200	1	165	0	0	No
JU1200	1	170	0	0	No
JU1200	1	175	1	3	No
JU1200	1	180	0	0	No
JU2587	1	5	0	0	Yes
JU2587	1	10	0	0	Yes
JU2587	1	15	0	0	Yes
JU2587	1	20	0	0	Yes
JU2587	1	25	0	0	Yes
JU2587	1	30	0	0	Yes
JU2587	1	35	0	0	Yes
JU2587	1	40	0	0	Yes
JU2587	1	45	0	0	Yes
JU2587	1	50	1	3	Yes
JU2587	1	55	0	0	Yes
JU2587	1	60	0	0	Yes
JU2587	1	65	0	0	Yes
JU2587	1	70	0	0	Yes
JU2587	1	75	1	5	Yes
JU2587	1	80	0	0	Yes
JU2587	1	85	0	0	Yes
JU2587	1	90	0	0	Yes
JU2587	1	95	0	0	Yes
JU2587	1	100	1	2	Yes
JU2587	1	105	1	1	Yes
JU2587	1	110	0	0	Yes
JU2587	1	115	0	0	Yes
JU2587	1	120	0	0	Yes
JU2587	1	125	1	3	Yes
JU2587	1	130	0	0	Yes
JU2587	1	135	0	0	Yes
JU2587	1	140	0	0	Yes
JU2587	1	145	1	3	Yes
JU2587	1	150	1	4	Yes
JU2587	1	155	1	4	Yes
JU2587	1	160	0	0	Yes
JU2587	1	165	0	0	Yes
JU2587	1	170	0	0	Yes
JU2587	1	175	0	0	Yes
JU2587	1	180	0	0	Yes
JU2593	1	5	0	0	No
JU2593	1	10	0	0	No
JU2593	1	15	0	0	No
JU2593	1	20	0	0	No
JU2593	1	25	0	0	No
JU2593	1	30	0	0	No
JU2593	1	35	0	0	No
JU2593	1	40	1	3	No
JU2593	1	45	0	0	No
JU2593	1	50	0	0	No
JU2593	1	55	0	0	No
JU2593	1	60	0	0	No
JU2593	1	65	0	0	No
JU2593	1	70	0	0	No
JU2593	1	75	1	5	No
JU2593	1	80	0	0	No
JU2593	1	85	0	0	No
JU2593	1	90	0	0	No
JU2593	1	95	0	0	No
JU2593	1	100	1	2	No
JU2593	1	105	1	4	No
JU2593	1	110	0	0	No
JU2593	1	115	0	0	No
JU2593	1	120	0	0	No
JU2593	1	125	0	0	No
JU2593	1	130	0	0	No
JU2593	1	135	0	0	No
JU2593	1	140	1	2	No
JU2593	1	145	1	1	No
JU2593	1	150	0	0	No
JU2593	1	155	0	0	No
JU2593	1	160	0	0	No
JU2593	1	165	0	0	No
JU2593	1	170	0	0	No
JU2593	1	175	1	1	No
JU2593	1	180	0	0	No
JU2829	1	5	0	0	Yes
JU2829	1	10	0	0	Yes
JU2829	1	15	0	0	Yes
JU2829	1	20	0	0	Yes
JU2829	1	25	0	0	Yes
JU2829	1	30	0	0	Yes
JU2829	1	35	0	0	Yes
JU2829	1	40	0	0	Yes
JU2829	1	45	0	0	Yes
JU2829	1	50	0	0	Yes
JU2829	1	55	1	4	Yes
JU2829	1	60	0	0	Yes
JU2829	1	65	0	0	Yes
JU2829	1	70	0	0	Yes
JU2829	1	75	0	0	Yes
JU2829	1	80	0	0	Yes
JU2829	1	85	0	0	Yes
JU2829	1	90	0	0	Yes
JU2829	1	95	1	2	Yes
JU2829	1	100	0	0	Yes
JU2829	1	105	1	4	Yes
JU2829	1	110	0	0	Yes
JU2829	1	115	1	2	Yes
JU2829	1	120	0	0	Yes
JU2829	1	125	0	0	Yes
JU2829	1	130	0	0	Yes
JU2829	1	135	0	0	Yes
JU2829	1	140	0	0	Yes
JU2829	1	145	1	5	Yes
JU2829	1	150	1	3	Yes
JU2829	1	155	0	0	Yes
JU2829	1	160	0	0	Yes
JU2829	1	165	0	0	Yes
JU2829	1	170	0	0	Yes
JU2829	1	175	0	0	Yes
JU2829	1	180	0	0	Yes
JU3166	1	5	0	0	Yes
JU3166	1	10	0	0	Yes
JU3166	1	15	1	2	Yes
JU3166	1	20	1	2	Yes
JU3166	1	25	0	0	Yes
JU3166	1	30	0	0	Yes
JU3166	1	35	0	0	Yes
JU3166	1	40	1	3	Yes
JU3166	1	45	1	2	Yes
JU3166	1	50	0	0	Yes
JU3166	1	55	0	0	Yes
JU3166	1	60	1	1	Yes
JU3166	1	65	1	2	Yes
JU3166	1	70	0	0	Yes
JU3166	1	75	0	0	Yes
JU3166	1	80	1	3	Yes
JU3166	1	85	0	0	Yes
JU3166	1	90	1	1	Yes
JU3166	1	95	0	0	Yes
JU3166	1	100	0	0	Yes
JU3166	1	105	1	2	Yes
JU3166	1	110	1	2	Yes
JU3166	1	115	1	3	Yes
JU3166	1	120	0	0	Yes
JU3166	1	125	1	1	Yes
JU3166	1	130	0	0	Yes
JU3166	1	135	1	1	Yes
JU3166	1	140	1	1	Yes
JU3166	1	145	1	2	Yes
JU3166	1	150	0	0	Yes
JU3166	1	155	1	2	Yes
JU3166	1	160	0	0	Yes
JU3166	1	165	1	1	Yes
JU3166	1	170	0	0	Yes
JU3166	1	175	1	1	Yes
JU3166	1	180	1	2	Yes
JU440	1	5	0	0	Yes
JU440	1	10	1	1	Yes
JU440	1	15	0	0	Yes
JU440	1	20	0	0	Yes
JU440	1	25	0	0	Yes
JU440	1	30	0	0	Yes
JU440	1	35	0	0	Yes
JU440	1	40	0	0	Yes
JU440	1	45	0	0	Yes
JU440	1	50	1	6	Yes
JU440	1	55	0	0	Yes
JU440	1	60	0	0	Yes
JU440	1	65	0	0	Yes
JU440	1	70	0	0	Yes
JU440	1	75	1	4	Yes
JU440	1	80	0	0	Yes
JU440	1	85	0	0	Yes
JU440	1	90	0	0	Yes
JU440	1	95	1	1	Yes
JU440	1	100	1	1	Yes
JU440	1	105	0	0	Yes
JU440	1	110	0	0	Yes
JU440	1	115	1	4	Yes
JU440	1	120	0	0	Yes
JU440	1	125	0	0	Yes
JU440	1	130	0	0	Yes
JU440	1	135	0	0	Yes
JU440	1	140	0	0	Yes
JU440	1	145	1	4	Yes
JU440	1	150	1	2	Yes
JU440	1	155	0	0	Yes
JU440	1	160	0	0	Yes
JU440	1	165	0	0	Yes
JU440	1	170	1	2	Yes
JU440	1	175	0	0	Yes
JU440	1	180	0	0	Yes
JU751	1	5	0	0	No
JU751	1	10	0	0	No
JU751	1	15	0	0	No
JU751	1	20	0	0	No
JU751	1	25	0	0	No
JU751	1	30	0	0	No
JU751	1	35	0	0	No
JU751	1	40	0	0	No
JU751	1	45	0	0	No
JU751	1	50	0	0	No
JU751	1	55	0	0	No
JU751	1	60	0	0	No
JU751	1	65	0	0	No
JU751	1	70	0	0	No
JU751	1	75	0	0	No
JU751	1	80	1	6	No
JU751	1	85	1	1	No
JU751	1	90	0	0	No
JU751	1	95	0	0	No
JU751	1	100	0	0	No
JU751	1	105	0	0	No
JU751	1	110	0	0	No
JU751	1	115	0	0	No
JU751	1	120	1	3	No
JU751	1	125	0	0	No
JU751	1	130	0	0	No
JU751	1	135	1	2	No
JU751	1	140	1	5	No
JU751	1	145	0	0	No
JU751	1	150	1	1	No
JU751	1	155	0	0	No
JU751	1	160	0	0	No
JU751	1	165	0	0	No
JU751	1	170	0	0	No
JU751	1	175	1	1	No
JU751	1	180	0	0	No
JU830	1	5	0	0	No
JU830	1	10	0	0	No
JU830	1	15	1	1	No
JU830	1	20	1	2	No
JU830	1	25	0	0	No
JU830	1	30	0	0	No
JU830	1	35	0	0	No
JU830	1	40	0	0	No
JU830	1	45	0	0	No
JU830	1	50	0	0	No
JU830	1	55	0	0	No
JU830	1	60	1	3	No
JU830	1	65	1	1	No
JU830	1	70	1	1	No
JU830	1	75	1	1	No
JU830	1	80	1	1	No
JU830	1	85	1	1	No
JU830	1	90	1	2	No
JU830	1	95	0	0	No
JU830	1	100	1	1	No
JU830	1	105	0	0	No
JU830	1	110	1	2	No
JU830	1	115	0	0	No
JU830	1	120	1	3	No
JU830	1	125	0	0	No
JU830	1	130	1	2	No
JU830	1	135	0	0	No
JU830	1	140	0	0	No
JU830	1	145	1	5	No
JU830	1	150	0	0	No
JU830	1	155	0	0	No
JU830	1	160	0	0	No
JU830	1	165	1	1	No
JU830	1	170	0	0	No
JU830	1	175	1	3	No
JU830	1	180	0	0	No
N2	1	5	0	0	No
N2	1	10	0	0	No
N2	1	15	0	0	No
N2	1	20	0	0	No
N2	1	25	0	0	No
N2	1	30	0	0	No
N2	1	35	0	0	No
N2	1	40	1	5	No
N2	1	45	0	0	No
N2	1	50	0	0	No
N2	1	55	0	0	No
N2	1	60	1	6	No
N2	1	65	0	0	No
N2	1	70	0	0	No
N2	1	75	0	0	No
N2	1	80	0	0	No
N2	1	85	0	0	No
N2	1	90	0	0	No
N2	1	95	0	0	No
N2	1	100	0	0	No
N2	1	105	1	2	No
N2	1	110	1	5	No
N2	1	115	0	0	No
N2	1	120	0	0	No
N2	1	125	0	0	No
N2	1	130	0	0	No
N2	1	135	0	0	No
N2	1	140	1	5	No
N2	1	145	0	0	No
N2	1	150	0	0	No
N2	1	155	0	0	No
N2	1	160	0	0	No
N2	1	165	0	0	No
N2	1	170	1	6	No
N2	1	175	0	0	No
N2	1	180	0	0	No
NIC1786	1	5	0	0	No
NIC1786	1	10	0	0	No
NIC1786	1	15	1	4	No
NIC1786	1	20	0	0	No
NIC1786	1	25	0	0	No
NIC1786	1	30	1	1	No
NIC1786	1	35	0	0	No
NIC1786	1	40	0	0	No
NIC1786	1	45	0	0	No
NIC1786	1	50	1	1	No
NIC1786	1	55	0	0	No
NIC1786	1	60	1	7	No
NIC1786	1	65	0	0	No
NIC1786	1	70	0	0	No
NIC1786	1	75	0	0	No
NIC1786	1	80	0	0	No
NIC1786	1	85	0	0	No
NIC1786	1	90	0	0	No
NIC1786	1	95	1	1	No
NIC1786	1	100	0	0	No
NIC1786	1	105	0	0	No
NIC1786	1	110	1	2	No
NIC1786	1	115	0	0	No
NIC1786	1	120	1	3	No
NIC1786	1	125	0	0	No
NIC1786	1	130	0	0	No
NIC1786	1	135	0	0	No
NIC1786	1	140	1	3	No
NIC1786	1	145	0	0	No
NIC1786	1	150	1	4	No
NIC1786	1	155	1	1	No
NIC1786	1	160	0	0	No
NIC1786	1	165	0	0	No
NIC1786	1	170	0	0	No
NIC1786	1	175	0	0	No
NIC1786	1	180	1	3	No
QG2873	1	5	0	0	No
QG2873	1	10	0	0	No
QG2873	1	15	0	0	No
QG2873	1	20	1	1	No
QG2873	1	25	0	0	No
QG2873	1	30	0	0	No
QG2873	1	35	0	0	No
QG2873	1	40	0	0	No
QG2873	1	45	0	0	No
QG2873	1	50	1	2	No
QG2873	1	55	1	1	No
QG2873	1	60	1	3	No
QG2873	1	65	1	3	No
QG2873	1	70	0	0	No
QG2873	1	75	0	0	No
QG2873	1	80	0	0	No
QG2873	1	85	1	3	No
QG2873	1	90	0	0	No
QG2873	1	95	1	3	No
QG2873	1	100	0	0	No
QG2873	1	105	1	1	No
QG2873	1	110	0	0	No
QG2873	1	115	0	0	No
QG2873	1	120	1	5	No
QG2873	1	125	0	0	No
QG2873	1	130	0	0	No
QG2873	1	135	0	0	No
QG2873	1	140	0	0	No
QG2873	1	145	0	0	No
QG2873	1	150	0	0	No
QG2873	1	155	0	0	No
QG2873	1	160	1	1	No
QG2873	1	165	1	2	No
QG2873	1	170	1	1	No
QG2873	1	175	0	0	No
QG2873	1	180	1	3	No
QX1430	1	5	0	0	No
QX1430	1	10	0	0	No
QX1430	1	15	1	4	No
QX1430	1	20	1	3	No
QX1430	1	25	0	0	No
QX1430	1	30	0	0	No
QX1430	1	35	1	1	No
QX1430	1	40	1	2	No
QX1430	1	45	0	0	No
QX1430	1	50	1	1	No
QX1430	1	55	0	0	No
QX1430	1	60	1	6	No
QX1430	1	65	0	0	No
QX1430	1	70	0	0	No
QX1430	1	75	0	0	No
QX1430	1	80	0	0	No
QX1430	1	85	1	3	No
QX1430	1	90	1	1	No
QX1430	1	95	0	0	No
QX1430	1	100	0	0	No
QX1430	1	105	0	0	No
QX1430	1	110	0	0	No
QX1430	1	115	1	1	No
QX1430	1	120	1	1	No
QX1430	1	125	0	0	No
QX1430	1	130	0	0	No
QX1430	1	135	0	0	No
QX1430	1	140	1	7	No
QX1430	1	145	0	0	No
QX1430	1	150	0	0	No
QX1430	1	155	1	2	No
QX1430	1	160	0	0	No
QX1430	1	165	0	0	No
QX1430	1	170	0	0	No
QX1430	1	175	1	1	No
QX1430	1	180	1	1	No
CB4856	2	5	0	0	Yes
CB4856	2	10	0	0	Yes
CB4856	2	15	1	4	Yes
CB4856	2	20	0	0	Yes
CB4856	2	25	1	2	Yes
CB4856	2	30	0	0	Yes
CB4856	2	35	0	0	Yes
CB4856	2	40	0	0	Yes
CB4856	2	45	0	0	Yes
CB4856	2	50	0	0	Yes
CB4856	2	55	1	2	Yes
CB4856	2	60	0	0	Yes
CB4856	2	65	1	1	Yes
CB4856	2	70	0	0	Yes
CB4856	2	75	0	0	Yes
CB4856	2	80	0	0	Yes
CB4856	2	85	1	1	Yes
CB4856	2	90	1	2	Yes
CB4856	2	95	0	0	Yes
CB4856	2	100	0	0	Yes
CB4856	2	105	0	0	Yes
CB4856	2	110	1	4	Yes
CB4856	2	115	0	0	Yes
CB4856	2	120	0	0	Yes
CB4856	2	125	0	0	Yes
CB4856	2	130	1	4	Yes
CB4856	2	135	0	0	Yes
CB4856	2	140	1	1	Yes
CB4856	2	145	0	0	Yes
CB4856	2	150	0	0	Yes
CB4856	2	155	0	0	Yes
CB4856	2	160	1	3	Yes
CB4856	2	165	0	0	Yes
CB4856	2	170	0	0	Yes
CB4856	2	175	0	0	Yes
CB4856	2	180	1	1	Yes
ED3005	2	5	0	0	No
ED3005	2	10	0	0	No
ED3005	2	15	0	0	No
ED3005	2	20	0	0	No
ED3005	2	25	0	0	No
ED3005	2	30	0	0	No
ED3005	2	35	0	0	No
ED3005	2	40	0	0	No
ED3005	2	45	1	3	No
ED3005	2	50	0	0	No
ED3005	2	55	1	2	No
ED3005	2	60	0	0	No
ED3005	2	65	0	0	No
ED3005	2	70	1	2	No
ED3005	2	75	0	0	No
ED3005	2	80	0	0	No
ED3005	2	85	0	0	No
ED3005	2	90	1	1	No
ED3005	2	95	0	0	No
ED3005	2	100	0	0	No
ED3005	2	105	1	3	No
ED3005	2	110	1	1	No
ED3005	2	115	0	0	No
ED3005	2	120	1	2	No
ED3005	2	125	0	0	No
ED3005	2	130	1	1	No
ED3005	2	135	0	0	No
ED3005	2	140	0	0	No
ED3005	2	145	0	0	No
ED3005	2	150	0	0	No
ED3005	2	155	1	4	No
ED3005	2	160	1	1	No
ED3005	2	165	0	0	No
ED3005	2	170	1	1	No
ED3005	2	175	0	0	No
ED3005	2	180	0	0	No
JU1200	2	5	0	0	No
JU1200	2	10	0	0	No
JU1200	2	15	1	1	No
JU1200	2	20	0	0	No
JU1200	2	25	1	1	No
JU1200	2	30	0	0	No
JU1200	2	35	0	0	No
JU1200	2	40	0	0	No
JU1200	2	45	1	1	No
JU1200	2	50	1	3	No
JU1200	2	55	0	0	No
JU1200	2	60	0	0	No
JU1200	2	65	0	0	No
JU1200	2	70	1	2	No
JU1200	2	75	1	1	No
JU1200	2	80	1	4	No
JU1200	2	85	0	0	No
JU1200	2	90	0	0	No
JU1200	2	95	0	0	No
JU1200	2	100	0	0	No
JU1200	2	105	1	6	No
JU1200	2	110	0	0	No
JU1200	2	115	0	0	No
JU1200	2	120	0	0	No
JU1200	2	125	0	0	No
JU1200	2	130	1	3	No
JU1200	2	135	0	0	No
JU1200	2	140	0	0	No
JU1200	2	145	1	6	No
JU1200	2	150	0	0	No
JU1200	2	155	0	0	No
JU1200	2	160	1	2	No
JU1200	2	165	0	0	No
JU1200	2	170	0	0	No
JU1200	2	175	1	4	No
JU1200	2	180	0	0	No
JU2587	2	5	0	0	No
JU2587	2	10	0	0	No
JU2587	2	15	0	0	No
JU2587	2	20	0	0	No
JU2587	2	25	0	0	No
JU2587	2	30	0	0	No
JU2587	2	35	0	0	No
JU2587	2	40	1	3	No
JU2587	2	45	0	0	No
JU2587	2	50	1	3	No
JU2587	2	55	1	1	No
JU2587	2	60	0	0	No
JU2587	2	65	0	0	No
JU2587	2	70	0	0	No
JU2587	2	75	0	0	No
JU2587	2	80	0	0	No
JU2587	2	85	1	4	No
JU2587	2	90	0	0	No
JU2587	2	95	0	0	No
JU2587	2	100	1	3	No
JU2587	2	105	0	0	No
JU2587	2	110	1	1	No
JU2587	2	115	0	0	No
JU2587	2	120	0	0	No
JU2587	2	125	0	0	No
JU2587	2	130	0	0	No
JU2587	2	135	0	0	No
JU2587	2	140	0	0	No
JU2587	2	145	0	0	No
JU2587	2	150	0	0	No
JU2587	2	155	0	0	No
JU2587	2	160	0	0	No
JU2587	2	165	0	0	No
JU2587	2	170	1	2	No
JU2587	2	175	0	0	No
JU2587	2	180	0	0	No
JU2593	2	5	0	0	No
JU2593	2	10	0	0	No
JU2593	2	15	0	0	No
JU2593	2	20	0	0	No
JU2593	2	25	0	0	No
JU2593	2	30	0	0	No
JU2593	2	35	0	0	No
JU2593	2	40	0	0	No
JU2593	2	45	0	0	No
JU2593	2	50	0	0	No
JU2593	2	55	1	5	No
JU2593	2	60	1	3	No
JU2593	2	65	0	0	No
JU2593	2	70	0	0	No
JU2593	2	75	0	0	No
JU2593	2	80	1	5	No
JU2593	2	85	1	1	No
JU2593	2	90	0	0	No
JU2593	2	95	0	0	No
JU2593	2	100	0	0	No
JU2593	2	105	0	0	No
JU2593	2	110	1	3	No
JU2593	2	115	0	0	No
JU2593	2	120	0	0	No
JU2593	2	125	0	0	No
JU2593	2	130	1	6	No
JU2593	2	135	0	0	No
JU2593	2	140	0	0	No
JU2593	2	145	0	0	No
JU2593	2	150	0	0	No
JU2593	2	155	1	2	No
JU2593	2	160	1	1	No
JU2593	2	165	0	0	No
JU2593	2	170	0	0	No
JU2593	2	175	0	0	No
JU2593	2	180	0	0	No
JU2829	2	5	0	0	No
JU2829	2	10	0	0	No
JU2829	2	15	0	0	No
JU2829	2	20	0	0	No
JU2829	2	25	0	0	No
JU2829	2	30	0	0	No
JU2829	2	35	0	0	No
JU2829	2	40	1	1	No
JU2829	2	45	1	2	No
JU2829	2	50	1	1	No
JU2829	2	55	0	0	No
JU2829	2	60	0	0	No
JU2829	2	65	0	0	No
JU2829	2	70	1	1	No
JU2829	2	75	1	3	No
JU2829	2	80	0	0	No
JU2829	2	85	0	0	No
JU2829	2	90	0	0	No
JU2829	2	95	1	1	No
JU2829	2	100	0	0	No
JU2829	2	105	1	3	No
JU2829	2	110	0	0	No
JU2829	2	115	0	0	No
JU2829	2	120	0	0	No
JU2829	2	125	0	0	No
JU2829	2	130	0	0	No
JU2829	2	135	0	0	No
JU2829	2	140	0	0	No
JU2829	2	145	0	0	No
JU2829	2	150	1	1	No
JU2829	2	155	0	0	No
JU2829	2	160	0	0	No
JU2829	2	165	1	1	No
JU2829	2	170	1	1	No
JU2829	2	175	0	0	No
JU2829	2	180	0	0	No
JU3166	2	5	1	3	No
JU3166	2	10	0	0	No
JU3166	2	15	0	0	No
JU3166	2	20	0	0	No
JU3166	2	25	0	0	No
JU3166	2	30	0	0	No
JU3166	2	35	1	2	No
JU3166	2	40	0	0	No
JU3166	2	45	0	0	No
JU3166	2	50	0	0	No
JU3166	2	55	0	0	No
JU3166	2	60	1	3	No
JU3166	2	65	1	1	No
JU3166	2	70	0	0	No
JU3166	2	75	0	0	No
JU3166	2	80	1	4	No
JU3166	2	85	0	0	No
JU3166	2	90	0	0	No
JU3166	2	95	0	0	No
JU3166	2	100	0	0	No
JU3166	2	105	1	2	No
JU3166	2	110	0	0	No
JU3166	2	115	1	5	No
JU3166	2	120	0	0	No
JU3166	2	125	0	0	No
JU3166	2	130	0	0	No
JU3166	2	135	1	3	No
JU3166	2	140	0	0	No
JU3166	2	145	0	0	No
JU3166	2	150	0	0	No
JU3166	2	155	1	4	No
JU3166	2	160	0	0	No
JU3166	2	165	1	1	No
JU3166	2	170	1	1	No
JU3166	2	175	0	0	No
JU3166	2	180	0	0	No
JU440	2	5	0	0	No
JU440	2	10	0	0	No
JU440	2	15	1	1	No
JU440	2	20	1	1	No
JU440	2	25	0	0	No
JU440	2	30	0	0	No
JU440	2	35	0	0	No
JU440	2	40	0	0	No
JU440	2	45	0	0	No
JU440	2	50	0	0	No
JU440	2	55	0	0	No
JU440	2	60	0	0	No
JU440	2	65	0	0	No
JU440	2	70	0	0	No
JU440	2	75	0	0	No
JU440	2	80	0	0	No
JU440	2	85	0	0	No
JU440	2	90	0	0	No
JU440	2	95	0	0	No
JU440	2	100	0	0	No
JU440	2	105	0	0	No
JU440	2	110	0	0	No
JU440	2	115	0	0	No
JU440	2	120	0	0	No
JU440	2	125	0	0	No
JU440	2	130	0	0	No
JU440	2	135	0	0	No
JU440	2	140	0	0	No
JU440	2	145	0	0	No
JU440	2	150	0	0	No
JU440	2	155	1	9	No
JU440	2	160	1	1	No
JU440	2	165	0	0	No
JU440	2	170	0	0	No
JU440	2	175	0	0	No
JU440	2	180	0	0	No
JU751	2	5	0	0	Yes
JU751	2	10	1	1	Yes
JU751	2	15	0	0	Yes
JU751	2	20	0	0	Yes
JU751	2	25	0	0	Yes
JU751	2	30	0	0	Yes
JU751	2	35	0	0	Yes
JU751	2	40	0	0	Yes
JU751	2	45	0	0	Yes
JU751	2	50	0	0	Yes
JU751	2	55	0	0	Yes
JU751	2	60	0	0	Yes
JU751	2	65	0	0	Yes
JU751	2	70	0	0	Yes
JU751	2	75	0	0	Yes
JU751	2	80	0	0	Yes
JU751	2	85	0	0	Yes
JU751	2	90	0	0	Yes
JU751	2	95	0	0	Yes
JU751	2	100	0	0	Yes
JU751	2	105	0	0	Yes
JU751	2	110	0	0	Yes
JU751	2	115	0	0	Yes
JU751	2	120	1	2	Yes
JU751	2	125	0	0	Yes
JU751	2	130	0	0	Yes
JU751	2	135	1	1	Yes
JU751	2	140	0	0	Yes
JU751	2	145	1	2	Yes
JU751	2	150	0	0	Yes
JU751	2	155	0	0	Yes
JU751	2	160	0	0	Yes
JU751	2	165	0	0	Yes
JU751	2	170	0	0	Yes
JU751	2	175	0	0	Yes
JU751	2	180	0	0	Yes
JU830	2	5	0	0	Yes
JU830	2	10	0	0	Yes
JU830	2	15	1	1	Yes
JU830	2	20	0	0	Yes
JU830	2	25	0	0	Yes
JU830	2	30	0	0	Yes
JU830	2	35	0	0	Yes
JU830	2	40	0	0	Yes
JU830	2	45	0	0	Yes
JU830	2	50	0	0	Yes
JU830	2	55	0	0	Yes
JU830	2	60	0	0	Yes
JU830	2	65	0	0	Yes
JU830	2	70	0	0	Yes
JU830	2	75	1	1	Yes
JU830	2	80	1	4	Yes
JU830	2	85	0	0	Yes
JU830	2	90	0	0	Yes
JU830	2	95	0	0	Yes
JU830	2	100	0	0	Yes
JU830	2	105	0	0	Yes
JU830	2	110	1	1	Yes
JU830	2	115	0	0	Yes
JU830	2	120	1	2	Yes
JU830	2	125	0	0	Yes
JU830	2	130	0	0	Yes
JU830	2	135	0	0	Yes
JU830	2	140	1	1	Yes
JU830	2	145	1	2	Yes
JU830	2	150	0	0	Yes
JU830	2	155	0	0	Yes
JU830	2	160	1	2	Yes
JU830	2	165	1	2	Yes
JU830	2	170	1	3	Yes
JU830	2	175	0	0	Yes
JU830	2	180	1	2	Yes
N2	2	5	0	0	No
N2	2	10	0	0	No
N2	2	15	0	0	No
N2	2	20	0	0	No
N2	2	25	0	0	No
N2	2	30	0	0	No
N2	2	35	0	0	No
N2	2	40	0	0	No
N2	2	45	0	0	No
N2	2	50	0	0	No
N2	2	55	0	0	No
N2	2	60	0	0	No
N2	2	65	1	7	No
N2	2	70	0	0	No
N2	2	75	0	0	No
N2	2	80	0	0	No
N2	2	85	1	4	No
N2	2	90	1	3	No
N2	2	95	0	0	No
N2	2	100	0	0	No
N2	2	105	0	0	No
N2	2	110	0	0	No
N2	2	115	0	0	No
N2	2	120	0	0	No
N2	2	125	1	3	No
N2	2	130	0	0	No
N2	2	135	0	0	No
N2	2	140	1	3	No
N2	2	145	0	0	No
N2	2	150	0	0	No
N2	2	155	1	2	No
N2	2	160	0	0	No
N2	2	165	0	0	No
N2	2	170	1	1	No
N2	2	175	0	0	No
N2	2	180	1	4	No
NIC1786	2	5	0	0	Yes
NIC1786	2	10	1	2	Yes
NIC1786	2	15	1	1	Yes
NIC1786	2	20	0	0	Yes
NIC1786	2	25	0	0	Yes
NIC1786	2	30	0	0	Yes
NIC1786	2	35	0	0	Yes
NIC1786	2	40	1	2	Yes
NIC1786	2	45	0	0	Yes
NIC1786	2	50	0	0	Yes
NIC1786	2	55	1	1	Yes
NIC1786	2	60	1	3	Yes
NIC1786	2	65	0	0	Yes
NIC1786	2	70	0	0	Yes
NIC1786	2	75	0	0	Yes
NIC1786	2	80	1	1	Yes
NIC1786	2	85	0	0	Yes
NIC1786	2	90	0	0	Yes
NIC1786	2	95	1	2	Yes
NIC1786	2	100	1	1	Yes
NIC1786	2	105	0	0	Yes
NIC1786	2	110	0	0	Yes
NIC1786	2	115	0	0	Yes
NIC1786	2	120	0	0	Yes
NIC1786	2	125	0	0	Yes
NIC1786	2	130	0	0	Yes
NIC1786	2	135	1	2	Yes
NIC1786	2	140	1	2	Yes
NIC1786	2	145	0	0	Yes
NIC1786	2	150	0	0	Yes
NIC1786	2	155	0	0	Yes
NIC1786	2	160	1	2	Yes
NIC1786	2	165	0	0	Yes
NIC1786	2	170	1	3	Yes
NIC1786	2	175	0	0	Yes
NIC1786	2	180	0	0	Yes
NIC1832	2	5	0	0	Yes
NIC1832	2	10	0	0	Yes
NIC1832	2	15	1	1	Yes
NIC1832	2	20	0	0	Yes
NIC1832	2	25	0	0	Yes
NIC1832	2	30	0	0	Yes
NIC1832	2	35	0	0	Yes
NIC1832	2	40	0	0	Yes
NIC1832	2	45	0	0	Yes
NIC1832	2	50	0	0	Yes
NIC1832	2	55	0	0	Yes
NIC1832	2	60	0	0	Yes
NIC1832	2	65	0	0	Yes
NIC1832	2	70	0	0	Yes
NIC1832	2	75	0	0	Yes
NIC1832	2	80	0	0	Yes
NIC1832	2	85	0	0	Yes
NIC1832	2	90	0	0	Yes
NIC1832	2	95	0	0	Yes
NIC1832	2	100	1	1	Yes
NIC1832	2	105	0	0	Yes
NIC1832	2	110	0	0	Yes
NIC1832	2	115	0	0	Yes
NIC1832	2	120	0	0	Yes
NIC1832	2	125	0	0	Yes
NIC1832	2	130	0	0	Yes
NIC1832	2	135	0	0	Yes
NIC1832	2	140	0	0	Yes
NIC1832	2	145	0	0	Yes
NIC1832	2	150	0	0	Yes
NIC1832	2	155	1	1	Yes
NIC1832	2	160	0	0	Yes
NIC1832	2	165	0	0	Yes
NIC1832	2	170	0	0	Yes
NIC1832	2	175	0	0	Yes
NIC1832	2	180	1	2	Yes
QG2873	2	5	0	0	No
QG2873	2	10	0	0	No
QG2873	2	15	1	1	No
QG2873	2	20	0	0	No
QG2873	2	25	0	0	No
QG2873	2	30	0	0	No
QG2873	2	35	0	0	No
QG2873	2	40	0	0	No
QG2873	2	45	1	2	No
QG2873	2	50	0	0	No
QG2873	2	55	1	3	No
QG2873	2	60	0	0	No
QG2873	2	65	1	2	No
QG2873	2	70	0	0	No
QG2873	2	75	0	0	No
QG2873	2	80	1	2	No
QG2873	2	85	1	2	No
QG2873	2	90	0	0	No
QG2873	2	95	1	1	No
QG2873	2	100	1	1	No
QG2873	2	105	1	1	No
QG2873	2	110	0	0	No
QG2873	2	115	1	2	No
QG2873	2	120	0	0	No
QG2873	2	125	0	0	No
QG2873	2	130	1	1	No
QG2873	2	135	1	2	No
QG2873	2	140	0	0	No
QG2873	2	145	0	0	No
QG2873	2	150	1	3	No
QG2873	2	155	0	0	No
QG2873	2	160	1	2	No
QG2873	2	165	1	1	No
QG2873	2	170	1	1	No
QG2873	2	175	0	0	No
QG2873	2	180	0	0	No
QX1430	2	5	0	0	Yes
QX1430	2	10	0	0	Yes
QX1430	2	15	0	0	Yes
QX1430	2	20	0	0	Yes
QX1430	2	25	0	0	Yes
QX1430	2	30	0	0	Yes
QX1430	2	35	1	3	Yes
QX1430	2	40	0	0	Yes
QX1430	2	45	0	0	Yes
QX1430	2	50	0	0	Yes
QX1430	2	55	0	0	Yes
QX1430	2	60	1	6	Yes
QX1430	2	65	0	0	Yes
QX1430	2	70	0	0	Yes
QX1430	2	75	0	0	Yes
QX1430	2	80	1	2	Yes
QX1430	2	85	1	2	Yes
QX1430	2	90	0	0	Yes
QX1430	2	95	1	2	Yes
QX1430	2	100	0	0	Yes
QX1430	2	105	0	0	Yes
QX1430	2	110	0	0	Yes
QX1430	2	115	0	0	Yes
QX1430	2	120	1	3	Yes
QX1430	2	125	0	0	Yes
QX1430	2	130	1	1	Yes
QX1430	2	135	0	0	Yes
QX1430	2	140	1	3	Yes
QX1430	2	145	0	0	Yes
QX1430	2	150	0	0	Yes
QX1430	2	155	1	4	Yes
QX1430	2	160	0	0	Yes
QX1430	2	165	0	0	Yes
QX1430	2	170	0	0	Yes
QX1430	2	175	1	6	Yes
QX1430	2	180	0	0	Yes
CB4856	3	5	0	0	No
CB4856	3	10	0	0	No
CB4856	3	15	0	0	No
CB4856	3	20	0	0	No
CB4856	3	25	0	0	No
CB4856	3	30	0	0	No
CB4856	3	35	1	1	No
CB4856	3	40	1	2	No
CB4856	3	45	0	0	No
CB4856	3	50	0	0	No
CB4856	3	55	1	1	No
CB4856	3	60	0	0	No
CB4856	3	65	1	4	No
CB4856	3	70	0	0	No
CB4856	3	75	0	0	No
CB4856	3	80	0	0	No
CB4856	3	85	0	0	No
CB4856	3	90	1	1	No
CB4856	3	95	1	4	No
CB4856	3	100	0	0	No
CB4856	3	105	1	1	No
CB4856	3	110	0	0	No
CB4856	3	115	1	2	No
CB4856	3	120	0	0	No
CB4856	3	125	0	0	No
CB4856	3	130	1	3	No
CB4856	3	135	0	0	No
CB4856	3	140	1	2	No
CB4856	3	145	0	0	No
CB4856	3	150	0	0	No
CB4856	3	155	0	0	No
CB4856	3	160	0	0	No
CB4856	3	165	0	0	No
CB4856	3	170	1	1	No
CB4856	3	175	1	3	No
CB4856	3	180	0	0	No
ED3005	3	5	0	0	No
ED3005	3	10	0	0	No
ED3005	3	15	0	0	No
ED3005	3	20	0	0	No
ED3005	3	25	0	0	No
ED3005	3	30	0	0	No
ED3005	3	35	0	0	No
ED3005	3	40	1	2	No
ED3005	3	45	0	0	No
ED3005	3	50	1	2	No
ED3005	3	55	1	1	No
ED3005	3	60	0	0	No
ED3005	3	65	1	2	No
ED3005	3	70	0	0	No
ED3005	3	75	0	0	No
ED3005	3	80	0	0	No
ED3005	3	85	0	0	No
ED3005	3	90	0	0	No
ED3005	3	95	1	2	No
ED3005	3	100	0	0	No
ED3005	3	105	0	0	No
ED3005	3	110	1	1	No
ED3005	3	115	1	1	No
ED3005	3	120	1	2	No
ED3005	3	125	0	0	No
ED3005	3	130	0	0	No
ED3005	3	135	0	0	No
ED3005	3	140	0	0	No
ED3005	3	145	0	0	No
ED3005	3	150	0	0	No
ED3005	3	155	0	0	No
ED3005	3	160	0	0	No
ED3005	3	165	0	0	No
ED3005	3	170	1	1	No
ED3005	3	175	1	1	No
ED3005	3	180	0	0	No
JU1200	3	5	0	0	No
JU1200	3	10	1	1	No
JU1200	3	15	0	0	No
JU1200	3	20	0	0	No
JU1200	3	25	1	5	No
JU1200	3	30	0	0	No
JU1200	3	35	0	0	No
JU1200	3	40	0	0	No
JU1200	3	45	0	0	No
JU1200	3	50	1	3	No
JU1200	3	55	0	0	No
JU1200	3	60	0	0	No
JU1200	3	65	1	4	No
JU1200	3	70	0	0	No
JU1200	3	75	0	0	No
JU1200	3	80	0	0	No
JU1200	3	85	0	0	No
JU1200	3	90	0	0	No
JU1200	3	95	0	0	No
JU1200	3	100	1	5	No
JU1200	3	105	0	0	No
JU1200	3	110	0	0	No
JU1200	3	115	0	0	No
JU1200	3	120	1	1	No
JU1200	3	125	0	0	No
JU1200	3	130	1	3	No
JU1200	3	135	0	0	No
JU1200	3	140	1	2	No
JU1200	3	145	1	4	No
JU1200	3	150	0	0	No
JU1200	3	155	0	0	No
JU1200	3	160	0	0	No
JU1200	3	165	0	0	No
JU1200	3	170	1	2	No
JU1200	3	175	0	0	No
JU1200	3	180	0	0	No
JU2587	3	5	0	0	No
JU2587	3	10	0	0	No
JU2587	3	15	0	0	No
JU2587	3	20	0	0	No
JU2587	3	25	0	0	No
JU2587	3	30	0	0	No
JU2587	3	35	0	0	No
JU2587	3	40	1	2	No
JU2587	3	45	0	0	No
JU2587	3	50	1	2	No
JU2587	3	55	0	0	No
JU2587	3	60	0	0	No
JU2587	3	65	1	1	No
JU2587	3	70	0	0	No
JU2587	3	75	0	0	No
JU2587	3	80	0	0	No
JU2587	3	85	0	0	No
JU2587	3	90	1	1	No
JU2587	3	95	1	4	No
JU2587	3	100	1	1	No
JU2587	3	105	1	1	No
JU2587	3	110	1	6	No
JU2587	3	115	1	2	No
JU2587	3	120	0	0	No
JU2587	3	125	1	1	No
JU2587	3	130	0	0	No
JU2587	3	135	0	0	No
JU2587	3	140	1	7	No
JU2587	3	145	0	0	No
JU2587	3	150	0	0	No
JU2587	3	155	0	0	No
JU2587	3	160	0	0	No
JU2587	3	165	0	0	No
JU2587	3	170	0	0	No
JU2587	3	175	1	1	No
JU2587	3	180	1	1	No
JU2593	3	5	1	2	No
JU2593	3	10	0	0	No
JU2593	3	15	0	0	No
JU2593	3	20	0	0	No
JU2593	3	25	0	0	No
JU2593	3	30	0	0	No
JU2593	3	35	0	0	No
JU2593	3	40	0	0	No
JU2593	3	45	0	0	No
JU2593	3	50	0	0	No
JU2593	3	55	0	0	No
JU2593	3	60	0	0	No
JU2593	3	65	1	4	No
JU2593	3	70	0	0	No
JU2593	3	75	0	0	No
JU2593	3	80	1	1	No
JU2593	3	85	1	6	No
JU2593	3	90	0	0	No
JU2593	3	95	0	0	No
JU2593	3	100	0	0	No
JU2593	3	105	1	4	No
JU2593	3	110	0	0	No
JU2593	3	115	0	0	No
JU2593	3	120	0	0	No
JU2593	3	125	0	0	No
JU2593	3	130	0	0	No
JU2593	3	135	0	0	No
JU2593	3	140	0	0	No
JU2593	3	145	1	7	No
JU2593	3	150	0	0	No
JU2593	3	155	0	0	No
JU2593	3	160	0	0	No
JU2593	3	165	0	0	No
JU2593	3	170	0	0	No
JU2593	3	175	0	0	No
JU2593	3	180	0	0	No
JU2829	3	5	0	0	No
JU2829	3	10	0	0	No
JU2829	3	15	0	0	No
JU2829	3	20	0	0	No
JU2829	3	25	0	0	No
JU2829	3	30	0	0	No
JU2829	3	35	1	2	No
JU2829	3	40	0	0	No
JU2829	3	45	0	0	No
JU2829	3	50	1	2	No
JU2829	3	55	0	0	No
JU2829	3	60	1	3	No
JU2829	3	65	0	0	No
JU2829	3	70	0	0	No
JU2829	3	75	0	0	No
JU2829	3	80	0	0	No
JU2829	3	85	0	0	No
JU2829	3	90	0	0	No
JU2829	3	95	0	0	No
JU2829	3	100	0	0	No
JU2829	3	105	0	0	No
JU2829	3	110	0	0	No
JU2829	3	115	0	0	No
JU2829	3	120	0	0	No
JU2829	3	125	0	0	No
JU2829	3	130	1	8	No
JU2829	3	135	0	0	No
JU2829	3	140	0	0	No
JU2829	3	145	0	0	No
JU2829	3	150	0	0	No
JU2829	3	155	0	0	No
JU2829	3	160	0	0	No
JU2829	3	165	1	4	No
JU2829	3	170	0	0	No
JU2829	3	175	0	0	No
JU2829	3	180	0	0	No
JU3166	3	5	0	0	No
JU3166	3	10	1	1	No
JU3166	3	15	0	0	No
JU3166	3	20	1	3	No
JU3166	3	25	1	2	No
JU3166	3	30	0	0	No
JU3166	3	35	1	1	No
JU3166	3	40	1	1	No
JU3166	3	45	0	0	No
JU3166	3	50	0	0	No
JU3166	3	55	1	3	No
JU3166	3	60	0	0	No
JU3166	3	65	0	0	No
JU3166	3	70	0	0	No
JU3166	3	75	1	2	No
JU3166	3	80	1	2	No
JU3166	3	85	0	0	No
JU3166	3	90	1	1	No
JU3166	3	95	0	0	No
JU3166	3	100	0	0	No
JU3166	3	105	0	0	No
JU3166	3	110	1	2	No
JU3166	3	115	0	0	No
JU3166	3	120	1	2	No
JU3166	3	125	0	0	No
JU3166	3	130	0	0	No
JU3166	3	135	1	1	No
JU3166	3	140	0	0	No
JU3166	3	145	1	2	No
JU3166	3	150	1	4	No
JU3166	3	155	0	0	No
JU3166	3	160	0	0	No
JU3166	3	165	1	1	No
JU3166	3	170	0	0	No
JU3166	3	175	1	1	No
JU3166	3	180	0	0	No
JU440	3	5	0	0	No
JU440	3	10	0	0	No
JU440	3	15	1	1	No
JU440	3	20	0	0	No
JU440	3	25	0	0	No
JU440	3	30	0	0	No
JU440	3	35	0	0	No
JU440	3	40	0	0	No
JU440	3	45	0	0	No
JU440	3	50	1	1	No
JU440	3	55	1	1	No
JU440	3	60	1	3	No
JU440	3	65	1	1	No
JU440	3	70	0	0	No
JU440	3	75	1	4	No
JU440	3	80	0	0	No
JU440	3	85	1	1	No
JU440	3	90	0	0	No
JU440	3	95	1	1	No
JU440	3	100	1	4	No
JU440	3	105	0	0	No
JU440	3	110	0	0	No
JU440	3	115	0	0	No
JU440	3	120	1	1	No
JU440	3	125	1	2	No
JU440	3	130	0	0	No
JU440	3	135	1	4	No
JU440	3	140	1	1	No
JU440	3	145	0	0	No
JU440	3	150	1	2	No
JU440	3	155	0	0	No
JU440	3	160	0	0	No
JU440	3	165	1	2	No
JU440	3	170	0	0	No
JU440	3	175	0	0	No
JU440	3	180	1	3	No
JU751	3	5	0	0	No
JU751	3	10	0	0	No
JU751	3	15	0	0	No
JU751	3	20	0	0	No
JU751	3	25	0	0	No
JU751	3	30	0	0	No
JU751	3	35	0	0	No
JU751	3	40	1	2	No
JU751	3	45	0	0	No
JU751	3	50	0	0	No
JU751	3	55	0	0	No
JU751	3	60	0	0	No
JU751	3	65	0	0	No
JU751	3	70	1	2	No
JU751	3	75	0	0	No
JU751	3	80	1	2	No
JU751	3	85	1	1	No
JU751	3	90	0	0	No
JU751	3	95	1	5	No
JU751	3	100	1	3	No
JU751	3	105	0	0	No
JU751	3	110	0	0	No
JU751	3	115	1	1	No
JU751	3	120	0	0	No
JU751	3	125	1	1	No
JU751	3	130	1	4	No
JU751	3	135	1	1	No
JU751	3	140	0	0	No
JU751	3	145	0	0	No
JU751	3	150	0	0	No
JU751	3	155	0	0	No
JU751	3	160	0	0	No
JU751	3	165	0	0	No
JU751	3	170	0	0	No
JU751	3	175	0	0	No
JU751	3	180	0	0	No
JU830	3	5	1	2	No
JU830	3	10	1	2	No
JU830	3	15	1	2	No
JU830	3	20	0	0	No
JU830	3	25	0	0	No
JU830	3	30	0	0	No
JU830	3	35	1	1	No
JU830	3	40	0	0	No
JU830	3	45	0	0	No
JU830	3	50	0	0	No
JU830	3	55	0	0	No
JU830	3	60	1	2	No
JU830	3	65	0	0	No
JU830	3	70	0	0	No
JU830	3	75	1	4	No
JU830	3	80	0	0	No
JU830	3	85	1	3	No
JU830	3	90	0	0	No
JU830	3	95	0	0	No
JU830	3	100	0	0	No
JU830	3	105	0	0	No
JU830	3	110	1	1	No
JU830	3	115	0	0	No
JU830	3	120	1	1	No
JU830	3	125	0	0	No
JU830	3	130	0	0	No
JU830	3	135	0	0	No
JU830	3	140	1	1	No
JU830	3	145	1	2	No
JU830	3	150	1	2	No
JU830	3	155	0	0	No
JU830	3	160	1	3	No
JU830	3	165	0	0	No
JU830	3	170	1	2	No
JU830	3	175	0	0	No
JU830	3	180	1	1	No
N2	3	5	0	0	No
N2	3	10	0	0	No
N2	3	15	0	0	No
N2	3	20	0	0	No
N2	3	25	0	0	No
N2	3	30	0	0	No
N2	3	35	0	0	No
N2	3	40	0	0	No
N2	3	45	0	0	No
N2	3	50	0	0	No
N2	3	55	1	5	No
N2	3	60	1	1	No
N2	3	65	0	0	No
N2	3	70	0	0	No
N2	3	75	0	0	No
N2	3	80	1	2	No
N2	3	85	0	0	No
N2	3	90	0	0	No
N2	3	95	0	0	No
N2	3	100	0	0	No
N2	3	105	0	0	No
N2	3	110	0	0	No
N2	3	115	0	0	No
N2	3	120	0	0	No
N2	3	125	0	0	No
N2	3	130	1	7	No
N2	3	135	1	3	No
N2	3	140	1	2	No
N2	3	145	1	1	No
N2	3	150	0	0	No
N2	3	155	1	3	No
N2	3	160	1	2	No
N2	3	165	0	0	No
N2	3	170	0	0	No
N2	3	175	0	0	No
N2	3	180	1	2	No
NIC1786	3	5	0	0	No
NIC1786	3	10	0	0	No
NIC1786	3	15	1	7	No
NIC1786	3	20	0	0	No
NIC1786	3	25	0	0	No
NIC1786	3	30	0	0	No
NIC1786	3	35	0	0	No
NIC1786	3	40	0	0	No
NIC1786	3	45	1	1	No
NIC1786	3	50	0	0	No
NIC1786	3	55	0	0	No
NIC1786	3	60	1	2	No
NIC1786	3	65	0	0	No
NIC1786	3	70	0	0	No
NIC1786	3	75	0	0	No
NIC1786	3	80	1	4	No
NIC1786	3	85	0	0	No
NIC1786	3	90	0	0	No
NIC1786	3	95	0	0	No
NIC1786	3	100	0	0	No
NIC1786	3	105	0	0	No
NIC1786	3	110	0	0	No
NIC1786	3	115	0	0	No
NIC1786	3	120	0	0	No
NIC1786	3	125	0	0	No
NIC1786	3	130	1	1	No
NIC1786	3	135	1	1	No
NIC1786	3	140	1	2	No
NIC1786	3	145	0	0	No
NIC1786	3	150	1	4	No
NIC1786	3	155	1	1	No
NIC1786	3	160	0	0	No
NIC1786	3	165	0	0	No
NIC1786	3	170	1	1	No
NIC1786	3	175	0	0	No
NIC1786	3	180	0	0	No
NIC1832	3	5	0	0	No
NIC1832	3	10	0	0	No
NIC1832	3	15	0	0	No
NIC1832	3	20	0	0	No
NIC1832	3	25	1	1	No
NIC1832	3	30	1	2	No
NIC1832	3	35	0	0	No
NIC1832	3	40	0	0	No
NIC1832	3	45	0	0	No
NIC1832	3	50	1	4	No
NIC1832	3	55	0	0	No
NIC1832	3	60	1	2	No
NIC1832	3	65	0	0	No
NIC1832	3	70	0	0	No
NIC1832	3	75	0	0	No
NIC1832	3	80	0	0	No
NIC1832	3	85	0	0	No
NIC1832	3	90	1	1	No
NIC1832	3	95	0	0	No
NIC1832	3	100	1	4	No
NIC1832	3	105	0	0	No
NIC1832	3	110	0	0	No
NIC1832	3	115	0	0	No
NIC1832	3	120	1	5	No
NIC1832	3	125	0	0	No
NIC1832	3	130	1	1	No
NIC1832	3	135	0	0	No
NIC1832	3	140	0	0	No
NIC1832	3	145	1	6	No
NIC1832	3	150	0	0	No
NIC1832	3	155	1	2	No
NIC1832	3	160	1	3	No
NIC1832	3	165	0	0	No
NIC1832	3	170	0	0	No
NIC1832	3	175	0	0	No
NIC1832	3	180	0	0	No
QG2873	3	5	1	1	Yes
QG2873	3	10	0	0	Yes
QG2873	3	15	0	0	Yes
QG2873	3	20	0	0	Yes
QG2873	3	25	0	0	Yes
QG2873	3	30	0	0	Yes
QG2873	3	35	0	0	Yes
QG2873	3	40	0	0	Yes
QG2873	3	45	1	2	Yes
QG2873	3	50	1	3	Yes
QG2873	3	55	0	0	Yes
QG2873	3	60	0	0	Yes
QG2873	3	65	0	0	Yes
QG2873	3	70	1	4	Yes
QG2873	3	75	0	0	Yes
QG2873	3	80	0	0	Yes
QG2873	3	85	1	4	Yes
QG2873	3	90	0	0	Yes
QG2873	3	95	1	3	Yes
QG2873	3	100	0	0	Yes
QG2873	3	105	1	3	Yes
QG2873	3	110	0	0	Yes
QG2873	3	115	1	1	Yes
QG2873	3	120	0	0	Yes
QG2873	3	125	0	0	Yes
QG2873	3	130	0	0	Yes
QG2873	3	135	1	3	Yes
QG2873	3	140	1	2	Yes
QG2873	3	145	0	0	Yes
QG2873	3	150	1	1	Yes
QG2873	3	155	0	0	Yes
QG2873	3	160	1	3	Yes
QG2873	3	165	0	0	Yes
QG2873	3	170	0	0	Yes
QG2873	3	175	0	0	Yes
QG2873	3	180	0	0	Yes
QX1430	3	5	0	0	No
QX1430	3	10	0	0	No
QX1430	3	15	0	0	No
QX1430	3	20	0	0	No
QX1430	3	25	0	0	No
QX1430	3	30	0	0	No
QX1430	3	35	0	0	No
QX1430	3	40	0	0	No
QX1430	3	45	1	2	No
QX1430	3	50	0	0	No
QX1430	3	55	0	0	No
QX1430	3	60	1	7	No
QX1430	3	65	1	1	No
QX1430	3	70	0	0	No
QX1430	3	75	0	0	No
QX1430	3	80	0	0	No
QX1430	3	85	0	0	No
QX1430	3	90	0	0	No
QX1430	3	95	1	3	No
QX1430	3	100	0	0	No
QX1430	3	105	0	0	No
QX1430	3	110	0	0	No
QX1430	3	115	0	0	No
QX1430	3	120	1	3	No
QX1430	3	125	0	0	No
QX1430	3	130	0	0	No
QX1430	3	135	1	2	No
QX1430	3	140	0	0	No
QX1430	3	145	0	0	No
QX1430	3	150	0	0	No
QX1430	3	155	1	1	No
QX1430	3	160	1	1	No
QX1430	3	165	0	0	No
QX1430	3	170	1	1	No
QX1430	3	175	1	1	No
QX1430	3	180	1	1	No
JU3166	4	5	0	0	No
JU3166	4	10	0	0	No
JU3166	4	15	0	0	No
JU3166	4	20	0	0	No
JU3166	4	25	1	5	No
JU3166	4	30	0	0	No
JU3166	4	35	0	0	No
JU3166	4	40	1	2	No
JU3166	4	45	0	0	No
JU3166	4	50	0	0	No
JU3166	4	55	0	0	No
JU3166	4	60	1	2	No
JU3166	4	65	0	0	No
JU3166	4	70	1	1	No
JU3166	4	75	0	0	No
JU3166	4	80	1	3	No
JU3166	4	85	0	0	No
JU3166	4	90	0	0	No
JU3166	4	95	1	4	No
JU3166	4	100	0	0	No
JU3166	4	105	0	0	No
JU3166	4	110	0	0	No
JU3166	4	115	1	1	No
JU3166	4	120	1	2	No
JU3166	4	125	0	0	No
JU3166	4	130	1	2	No
JU3166	4	135	0	0	No
JU3166	4	140	0	0	No
JU3166	4	145	1	2	No
JU3166	4	150	0	0	No
JU3166	4	155	1	2	No
JU3166	4	160	0	0	No
JU3166	4	165	0	0	No
JU3166	4	170	1	1	No
JU3166	4	175	1	1	No
JU3166	4	180	1	2	No
JU751	4	5	0	0	No
JU751	4	10	0	0	No
JU751	4	15	0	0	No
JU751	4	20	0	0	No
JU751	4	25	0	0	No
JU751	4	30	0	0	No
JU751	4	35	0	0	No
JU751	4	40	0	0	No
JU751	4	45	1	2	No
JU751	4	50	0	0	No
JU751	4	55	0	0	No
JU751	4	60	0	0	No
JU751	4	65	0	0	No
JU751	4	70	0	0	No
JU751	4	75	0	0	No
JU751	4	80	1	3	No
JU751	4	85	0	0	No
JU751	4	90	1	4	No
JU751	4	95	0	0	No
JU751	4	100	1	1	No
JU751	4	105	0	0	No
JU751	4	110	0	0	No
JU751	4	115	1	3	No
JU751	4	120	0	0	No
JU751	4	125	0	0	No
JU751	4	130	0	0	No
JU751	4	135	1	3	No
JU751	4	140	0	0	No
JU751	4	145	0	0	No
JU751	4	150	1	3	No
JU751	4	155	0	0	No
JU751	4	160	0	0	No
JU751	4	165	1	1	No
JU751	4	170	0	0	No
JU751	4	175	1	5	No
JU751	4	180	1	1	No
QX1430	4	5	0	0	No
QX1430	4	10	0	0	No
QX1430	4	15	0	0	No
QX1430	4	20	1	3	No
QX1430	4	25	0	0	No
QX1430	4	30	0	0	No
QX1430	4	35	0	0	No
QX1430	4	40	0	0	No
QX1430	4	45	1	4	No
QX1430	4	50	0	0	No
QX1430	4	55	0	0	No
QX1430	4	60	0	0	No
QX1430	4	65	1	3	No
QX1430	4	70	0	0	No
QX1430	4	75	0	0	No
QX1430	4	80	0	0	No
QX1430	4	85	1	1	No
QX1430	4	90	1	2	No
QX1430	4	95	1	3	No
QX1430	4	100	0	0	No
QX1430	4	105	0	0	No
QX1430	4	110	0	0	No
QX1430	4	115	0	0	No
QX1430	4	120	0	0	No
QX1430	4	125	1	4	No
QX1430	4	130	0	0	No
QX1430	4	135	0	0	No
QX1430	4	140	0	0	No
QX1430	4	145	0	0	No
QX1430	4	150	0	0	No
QX1430	4	155	0	0	No
QX1430	4	160	1	4	No
QX1430	4	165	0	0	No
QX1430	4	170	0	0	No
QX1430	4	175	0	0	No
QX1430	4	180	0	0	No
JU751	5	5	0	0	No
JU751	5	10	0	0	No
JU751	5	15	0	0	No
JU751	5	20	0	0	No
JU751	5	25	0	0	No
JU751	5	30	0	0	No
JU751	5	35	0	0	No
JU751	5	40	0	0	No
JU751	5	45	0	0	No
JU751	5	50	0	0	No
JU751	5	55	0	0	No
JU751	5	60	1	9	No
JU751	5	65	0	0	No
JU751	5	70	0	0	No
JU751	5	75	0	0	No
JU751	5	80	0	0	No
JU751	5	85	0	0	No
JU751	5	90	0	0	No
JU751	5	95	0	0	No
JU751	5	100	1	2	No
JU751	5	105	0	0	No
JU751	5	110	0	0	No
JU751	5	115	0	0	No
JU751	5	120	0	0	No
JU751	5	125	0	0	No
JU751	5	130	0	0	No
JU751	5	135	0	0	No
JU751	5	140	0	0	No
JU751	5	145	0	0	No
JU751	5	150	0	0	No
JU751	5	155	1	5	No
JU751	5	160	1	3	No
JU751	5	165	0	0	No
JU751	5	170	0	0	No
JU751	5	175	0	0	No
JU751	5	180	0	0	No
JU751	6	5	0	0	No
JU751	6	10	0	0	No
JU751	6	15	0	0	No
JU751	6	20	0	0	No
JU751	6	25	0	0	No
JU751	6	30	0	0	No
JU751	6	35	0	0	No
JU751	6	40	0	0	No
JU751	6	45	0	0	No
JU751	6	50	0	0	No
JU751	6	55	1	4	No
JU751	6	60	0	0	No
JU751	6	65	1	3	No
JU751	6	70	0	0	No
JU751	6	75	0	0	No
JU751	6	80	0	0	No
JU751	6	85	0	0	No
JU751	6	90	0	0	No
JU751	6	95	0	0	No
JU751	6	100	0	0	No
JU751	6	105	1	3	No
JU751	6	110	1	1	No
JU751	6	115	1	2	No
JU751	6	120	0	0	No
JU751	6	125	1	2	No
JU751	6	130	0	0	No
JU751	6	135	0	0	No
JU751	6	140	0	0	No
JU751	6	145	1	1	No
JU751	6	150	1	1	No
JU751	6	155	1	2	No
JU751	6	160	0	0	No
JU751	6	165	1	6	No
JU751	6	170	0	0	No
JU751	6	175	0	0	No
JU751	6	180	0	0	No
CB4856	4	5	0	0	No
CB4856	4	10	1	2	No
CB4856	4	15	1	2	No
CB4856	4	20	0	0	No
CB4856	4	25	0	0	No
CB4856	4	30	1	2	No
CB4856	4	35	0	0	No
CB4856	4	40	0	0	No
CB4856	4	45	0	0	No
CB4856	4	50	0	0	No
CB4856	4	55	1	3	No
CB4856	4	60	0	0	No
CB4856	4	65	0	0	No
CB4856	4	70	0	0	No
CB4856	4	75	1	2	No
CB4856	4	80	1	2	No
CB4856	4	85	0	0	No
CB4856	4	90	0	0	No
CB4856	4	95	0	0	No
CB4856	4	100	1	1	No
CB4856	4	105	0	0	No
CB4856	4	110	1	2	No
CB4856	4	115	0	0	No
CB4856	4	120	1	2	No
CB4856	4	125	0	0	No
CB4856	4	130	0	0	No
CB4856	4	135	0	0	No
CB4856	4	140	1	1	No
CB4856	4	145	0	0	No
CB4856	4	150	1	3	No
CB4856	4	155	0	0	No
CB4856	4	160	0	0	No
CB4856	4	165	0	0	No
CB4856	4	170	1	3	No
CB4856	4	175	0	0	No
CB4856	4	180	0	0	No
ED3005	4	5	1	1	No
ED3005	4	10	1	1	No
ED3005	4	15	1	2	No
ED3005	4	20	0	0	No
ED3005	4	25	0	0	No
ED3005	4	30	0	0	No
ED3005	4	35	0	0	No
ED3005	4	40	0	0	No
ED3005	4	45	1	1	No
ED3005	4	50	0	0	No
ED3005	4	55	0	0	No
ED3005	4	60	0	0	No
ED3005	4	65	1	1	No
ED3005	4	70	0	0	No
ED3005	4	75	1	1	No
ED3005	4	80	0	0	No
ED3005	4	85	0	0	No
ED3005	4	90	0	0	No
ED3005	4	95	0	0	No
ED3005	4	100	1	2	No
ED3005	4	105	0	0	No
ED3005	4	110	0	0	No
ED3005	4	115	0	0	No
ED3005	4	120	0	0	No
ED3005	4	125	1	2	No
ED3005	4	130	0	0	No
ED3005	4	135	0	0	No
ED3005	4	140	0	0	No
ED3005	4	145	1	1	No
ED3005	4	150	0	0	No
ED3005	4	155	1	3	No
ED3005	4	160	0	0	No
ED3005	4	165	1	1	No
ED3005	4	170	1	2	No
ED3005	4	175	0	0	No
ED3005	4	180	0	0	No
JU1200	4	5	0	0	No
JU1200	4	10	0	0	No
JU1200	4	15	0	0	No
JU1200	4	20	0	0	No
JU1200	4	25	0	0	No
JU1200	4	30	0	0	No
JU1200	4	35	0	0	No
JU1200	4	40	0	0	No
JU1200	4	45	1	2	No
JU1200	4	50	0	0	No
JU1200	4	55	0	0	No
JU1200	4	60	0	0	No
JU1200	4	65	1	2	No
JU1200	4	70	1	1	No
JU1200	4	75	1	1	No
JU1200	4	80	1	2	No
JU1200	4	85	1	2	No
JU1200	4	90	1	1	No
JU1200	4	95	1	2	No
JU1200	4	100	0	0	No
JU1200	4	105	0	0	No
JU1200	4	110	1	3	No
JU1200	4	115	1	3	No
JU1200	4	120	0	0	No
JU1200	4	125	0	0	No
JU1200	4	130	0	0	No
JU1200	4	135	0	0	No
JU1200	4	140	1	4	No
JU1200	4	145	0	0	No
JU1200	4	150	1	1	No
JU1200	4	155	0	0	No
JU1200	4	160	0	0	No
JU1200	4	165	0	0	No
JU1200	4	170	1	3	No
JU1200	4	175	0	0	No
JU1200	4	180	0	0	No
JU2587	4	5	1	2	No
JU2587	4	10	0	0	No
JU2587	4	15	0	0	No
JU2587	4	20	1	1	No
JU2587	4	25	1	2	No
JU2587	4	30	0	0	No
JU2587	4	35	0	0	No
JU2587	4	40	0	0	No
JU2587	4	45	1	1	No
JU2587	4	50	1	1	No
JU2587	4	55	0	0	No
JU2587	4	60	1	1	No
JU2587	4	65	0	0	No
JU2587	4	70	1	1	No
JU2587	4	75	1	2	No
JU2587	4	80	0	0	No
JU2587	4	85	0	0	No
JU2587	4	90	0	0	No
JU2587	4	95	0	0	No
JU2587	4	100	0	0	No
JU2587	4	105	0	0	No
JU2587	4	110	0	0	No
JU2587	4	115	1	3	No
JU2587	4	120	0	0	No
JU2587	4	125	1	3	No
JU2587	4	130	0	0	No
JU2587	4	135	0	0	No
JU2587	4	140	1	1	No
JU2587	4	145	1	4	No
JU2587	4	150	0	0	No
JU2587	4	155	0	0	No
JU2587	4	160	1	1	No
JU2587	4	165	1	1	No
JU2587	4	170	0	0	No
JU2587	4	175	0	0	No
JU2587	4	180	0	0	No
JU2829	4	5	0	0	No
JU2829	4	10	0	0	No
JU2829	4	15	0	0	No
JU2829	4	20	0	0	No
JU2829	4	25	0	0	No
JU2829	4	30	0	0	No
JU2829	4	35	0	0	No
JU2829	4	40	1	1	No
JU2829	4	45	1	1	No
JU2829	4	50	0	0	No
JU2829	4	55	1	5	No
JU2829	4	60	1	3	No
JU2829	4	65	0	0	No
JU2829	4	70	1	1	No
JU2829	4	75	0	0	No
JU2829	4	80	0	0	No
JU2829	4	85	0	0	No
JU2829	4	90	0	0	No
JU2829	4	95	1	2	No
JU2829	4	100	1	1	No
JU2829	4	105	0	0	No
JU2829	4	110	1	1	No
JU2829	4	115	1	1	No
JU2829	4	120	0	0	No
JU2829	4	125	0	0	No
JU2829	4	130	0	0	No
JU2829	4	135	1	2	No
JU2829	4	140	0	0	No
JU2829	4	145	1	3	No
JU2829	4	150	0	0	No
JU2829	4	155	0	0	No
JU2829	4	160	0	0	No
JU2829	4	165	0	0	No
JU2829	4	170	0	0	No
JU2829	4	175	1	1	No
JU2829	4	180	0	0	No
JU3166	5	5	0	0	No
JU3166	5	10	0	0	No
JU3166	5	15	1	2	No
JU3166	5	20	1	2	No
JU3166	5	25	0	0	No
JU3166	5	30	1	1	No
JU3166	5	35	0	0	No
JU3166	5	40	0	0	No
JU3166	5	45	1	1	No
JU3166	5	50	1	2	No
JU3166	5	55	0	0	No
JU3166	5	60	0	0	No
JU3166	5	65	0	0	No
JU3166	5	70	1	2	No
JU3166	5	75	1	1	No
JU3166	5	80	0	0	No
JU3166	5	85	0	0	No
JU3166	5	90	1	2	No
JU3166	5	95	1	3	No
JU3166	5	100	0	0	No
JU3166	5	105	0	0	No
JU3166	5	110	0	0	No
JU3166	5	115	0	0	No
JU3166	5	120	1	2	No
JU3166	5	125	1	2	No
JU3166	5	130	0	0	No
JU3166	5	135	0	0	No
JU3166	5	140	1	2	No
JU3166	5	145	0	0	No
JU3166	5	150	1	1	No
JU3166	5	155	0	0	No
JU3166	5	160	0	0	No
JU3166	5	165	1	1	No
JU3166	5	170	1	1	No
JU3166	5	175	1	3	No
JU3166	5	180	0	0	No
JU440	4	5	0	0	No
JU440	4	10	0	0	No
JU440	4	15	0	0	No
JU440	4	20	1	1	No
JU440	4	25	0	0	No
JU440	4	30	1	2	No
JU440	4	35	0	0	No
JU440	4	40	1	1	No
JU440	4	45	0	0	No
JU440	4	50	0	0	No
JU440	4	55	0	0	No
JU440	4	60	0	0	No
JU440	4	65	0	0	No
JU440	4	70	0	0	No
JU440	4	75	0	0	No
JU440	4	80	1	5	No
JU440	4	85	0	0	No
JU440	4	90	0	0	No
JU440	4	95	0	0	No
[truncated: 7,505 more rows]

## Sheet: Figure 5 - Summary data
Class	Strain	N total observed intervals	N intervals with egg laying	Estimate mean duration of inactive periods	Mean number of eggs laid per interval with egg laying	Total eggs laid
Class I	JU3166	36	16	9	1.9	30
Class I	JU3166	36	12	11.3	2.5	30
Class I	JU3166	36	19	7.5	1.79	34
Class I	JU3166	36	11	14.38	2.64	29
Class I	JU3166	36	16	7.73	1.81	29
Class I	JU3166	36	14	9	2.14	30
Class I	JU3166	36	16	10.625	1.75	28
Class I	JU3166	36	17	11.25	1.71	29
Class I	JU3166	36	14	13.125	1.43	20
Class I	JU3166	36	17	7.72727	1.65	28
Class I	JU3166	36	17	9	1.94	33
Class I	JU3166	36	17	9.44444	1.88	32
Class I	JU3166	36	15	8.75	1.47	22
Class I	JU3166	36	14	13.75	2.07	29
Class I	JU3166	36	15	12.8571	1.73	26
Class I	JU3166	36	9	16.67	2.22	20
Class I	JU3166	36	12	10.71	2.83	34
Class I	JU3166	36	10	12.5	2.6	26
Class I	QG2873	36	15	10.5	1.9	29
Class I	QG2873	36	11	14.3	2.4	26
Class I	QG2873	36	16	10	1.3	20
Class I	QG2873	36	13	14.29	2.23	29
Class I	QG2873	36	16	8.89	1.69	27
Class I	QG2873	36	12	11.11	2.5	30
Class I	QG2873	36	13	10.5556	1.38	18
Class I	QG2873	36	14	10	1.5	21
Class I	QG2873	36	11	15	2.27	25
Class I	QG2873	36	14	10	1.36	19
Class I	QG2873	36	7	20	1.86	13
Class I	QG2873	36	9	28.75	1.67	15
Class I	QG2873	36	11	15	1.82	20
Class I	QG2873	36	5	18.75	1.4	7
Class I	QG2873	36	13	8.5	1.69	22
Class I	QG2873	36	13	15.83	1.92	25
Class I	QG2873	36	17	7.5	1.65	28
Class II	CB4856	36	8	24	3.3	26
Class II	CB4856	36	13	12.5	2.2	29
Class II	CB4856	36	15	9.4	1.9	28
Class II	CB4856	36	9	16	1.89	17
Class II	CB4856	36	11	12.78	2.27	25
Class II	CB4856	36	12	10.63	2.08	25
Class II	CB4856	36	12	11.6667	2.08	25
Class II	CB4856	36	8	16.6667	2.75	22
Class II	CB4856	36	14	15.7143	2	28
Class II	CB4856	36	13	12	1.77	23
Class II	CB4856	36	11	16.4286	1.45	16
Class II	CB4856	36	14	14.2857	1.93	27
Class II	CB4856	36	8	23	2.5	20
Class II	CB4856	36	16	10	1.75	28
Class II	CB4856	36	8	20.8333	2	16
Class II	CB4856	36	12	15.71	1.42	17
Class II	CB4856	36	5	30	3.2	16
Class II	JU1200	36	17	10	1.8	31
Class II	JU1200	36	16	9	1.9	31
Class II	JU1200	36	13	16.4	2.4	31
Class II	JU1200	36	10	17.14	3	30
Class II	JU1200	36	12	13.13	2.83	34
Class II	JU1200	36	10	14.38	3	30
Class II	JU1200	36	13	13	2.08	27
Class II	JU1200	36	9	15	3	27
Class II	JU1200	36	9	18.3333	2.44	22
Class II	JU1200	36	11	11.6667	1.91	21
Class II	JU1200	36	8	19.1667	1.75	14
Class II	JU1200	36	5	32.5	1.6	8
Class II	JU1200	36	10	13.125	1.4	14
Class II	JU1200	36	12	15	1.92	23
Class II	JU1200	36	10	14.17	2.1	21
Class II	JU1200	36	5	21.67	2	10
Class II	JU1200	36	10	15	1.9	19
Class II	N2	36	10	14.2	2.7	27
Class II	N2	36	6	21.7	4.2	25
Class II	N2	36	7	12.5	4.1	29
Class II	N2	36	6	26.25	4.83	29
Class II	N2	36	8	13.33	3.38	27
Class II	N2	36	10	20	2.8	28
Class II	N2	36	15	14.2857	2.8	42
Class II	N2	36	14	14.1667	2.29	32
Class II	N2	36	11	13.75	3.55	39
Class II	N2	36	10	19	1.7	17
Class II	N2	36	7	20.8333	3.43	24
Class II	N2	36	9	12.5	2.89	26
Class II	N2	36	7	30	2.86	20
Class II	N2	36	7	22.5	3.86	27
Class II	N2	36	4	36.6667	6.25	25
Class II	N2	36	4	80	4	16
Class II	N2	36	10	20	2.9	29
Class II	N2	36	4	33.33	6.5	26
Class II	QX1430	36	11	15	3.1	34
Class II	QX1430	36	10	15	2.9	29
Class II	QX1430	36	14	12.5	2.43	34
Class II	QX1430	36	10	12.86	3.2	32
Class II	QX1430	36	11	14.17	2.09	23
Class II	QX1430	36	8	18.2	3	24
Class II	QX1430	36	15	8.57143	2.27	34
Class II	QX1430	36	13	13.125	2.23	29
Class II	QX1430	36	15	9.54545	2	30
Class II	QX1430	36	9	14.2857	2.11	19
Class II	QX1430	36	15	13.3333	1.87	28
Class II	QX1430	36	13	14.2857	2.15	28
Class II	QX1430	36	10	21	2.4	24
Class II	QX1430	36	14	11.6667	2.07	29
Class II	QX1430	36	15	11.6667	1.8	27
Class II	QX1430	36	11	7	2.18	24
Class II	QX1430	36	12	12.86	2.58	31
Class III A	ED3005	36	16	9	1.8	29
Class III A	ED3005	36	6	31.3	4.2	25
Class III A	ED3005	36	14	10.8	2.2	31
Class III A	ED3005	36	13	10.71	1.38	18
Class III A	ED3005	36	11	9.38	1.91	21
Class III A	ED3005	36	10	18	1.5	15
Class III A	ED3005	36	12	13.75	1.5	18
Class III A	ED3005	36	13	15.7143	2.31	30
Class III A	ED3005	36	15	11.875	1.53	23
Class III A	ED3005	36	15	10	1.67	25
Class III A	ED3005	36	10	15	2.4	24
Class III A	ED3005	36	8	15.7143	1.88	15
Class III A	ED3005	36	10	28.75	1.5	15
Class III A	ED3005	36	4	30	2	8
Class III A	ED3005	36	9	32.5	2	18
Class III A	ED3005	36	8	23	2.13	17
Class III A	ED3005	36	10	15	1.6	16
Class III A	ED3005	36	7	21	2.71	19
Class III A	JU2829	36	9	28.8	1.8	16
Class III A	JU2829	36	9	18.3	1.9	17
Class III A	JU2829	36	10	14.3	2	20
Class III A	JU2829	36	6	17.5	3.33	20
Class III A	JU2829	36	10	17	1.5	15
Class III A	JU2829	36	5	27.5	3.8	19
Class III A	JU2829	36	12	11.4286	1.83	22
Class III A	JU2829	36	6	15	2.83	17
Class III A	JU2829	36	8	16.4286	2.88	23
Class III A	JU2829	36	10	10.7143	1.6	16
Class III A	JU2829	36	8	21.25	2.5	20
Class III A	JU2829	36	8	28.75	1.38	11
Class III A	JU2829	36	4	80	2.5	10
Class III A	JU2829	36	7	26	3.14	22
Class III A	JU2829	36	7	20	2.57	18
Class III A	JU2829	36	8	22.5	2.25	18
Class III A	JU2829	36	4	18	3	12
Class III A	JU2829	36	8	20	2.63	21
Class III A	JU440	36	13	10	1.8	23
Class III A	JU440	36	12	15.8	2.3	28
Class III A	JU440	36	15	9.5	1.9	29
Class III A	JU440	36	9	19.17	2.78	25
Class III A	JU440	36	4	130	3.5	14
Class III A	JU440	36	16	10.63	2	32
Class III A	JU440	36	11	12.2222	2	22
Class III A	JU440	36	12	16.6667	1.75	21
Class III A	JU440	36	13	14.375	1.46	19
Class III A	JU440	36	13	11.875	1.54	20
Class III A	JU440	36	14	12.5	1.79	25
Class III A	JU440	36	12	11.875	2.42	29
Class III A	JU440	36	10	17.1429	1.6	16
Class III A	JU440	36	13	13.3333	1.77	23
Class III A	JU440	36	7	21	1.86	13
Class III A	JU440	36	10	31.25	1.3	13
Class III A	JU440	36	8	16.67	2.88	23
Class III A	JU440	36	8	19.17	2.5	20
Class III A	JU830	36	13	11.4	1.8	24
Class III A	JU830	36	15	11.3	1.5	23
Class III A	JU830	36	11	19.2	2.2	24
Class III A	JU830	36	16	10.63	1.88	30
Class III A	JU830	36	11	18.33	1.91	21
Class III A	JU830	36	15	10.5	1.93	29
Class III A	JU830	36	14	11.875	2	28
Class III A	JU830	36	14	8.33333	1.86	26
Class III A	JU830	36	16	11.875	1.81	29
Class III A	JU830	36	11	15	1.82	20
Class III A	JU830	36	9	18.5714	2	18
Class III A	JU830	36	10	16	2.1	21
Class III A	JU830	36	10	16.4286	1.2	12
Class III A	JU830	36	13	12.5	1.38	18
Class III A	JU830	36	11	13.75	1.73	19
Class III A	JU830	36	13	9.44	1.38	18
Class III A	JU830	36	9	16.67	1.33	12
Class III A	NIC1786	36	12	16.4	2.7	32
Class III A	NIC1786	36	14	12.2	2.4	33
Class III A	NIC1786	36	17	13.6	2.1	35
Class III A	NIC1786	36	11	12.78	2.73	30
Class III A	NIC1786	36	12	15	1.83	22
Class III A	NIC1786	36	10	18.33	2.4	24
Class III A	NIC1786	36	11	10.4545	1.73	19
Class III A	NIC1786	36	11	12.5	2.18	24
Class III A	NIC1786	36	13	14.2857	1.31	17
Class III A	NIC1786	36	9	21.6667	1.44	13
Class III A	NIC1786	36	12	16.4286	1.33	16
Class III A	NIC1786	36	9	18.5714	1.67	15
Class III A	NIC1786	36	7	25	2.14	15
Class III A	NIC1786	36	8	21	2.25	18
Class III A	NIC1786	36	13	14.2857	1.77	23
Class III A	NIC1786	36	6	21.25	2.67	16
Class III A	NIC1786	36	8	12.5	2	16
Class III A	NIC1786	36	11	15.83	1.73	19
Class III B	JU2587	36	10	13.8	1.5	15
Class III B	JU2587	36	8	13	2.6	21
Class III B	JU2587	36	10	13.3	2.2	22
Class III B	JU2587	36	8	17.5	3.13	25
Class III B	JU2587	36	7	20	2.43	17
Class III B	JU2587	36	13	13.33	2.31	30
Class III B	JU2587	36	14	11.875	1.71	24
Class III B	JU2587	36	12	14.375	2.08	25
Class III B	JU2587	36	12	16.4286	2.75	33
Class III B	JU2587	36	5	25	2.6	13
Class III B	JU2587	36	11	9.28571	1.73	19
Class III B	JU2587	36	10	11.25	1.8	18
Class III B	JU2587	36	12	17.5	1.92	23
Class III B	JU2587	36	10	15.8333	1.4	14
Class III B	JU2587	36	8	16.4286	2.75	22
Class III B	JU2587	36	13	12.2222	1.62	21
Class III B	JU2587	36	12	17	1.5	18
Class III B	JU2587	36	8	15.83	2	16
Class III B	JU2593	36	5	22.5	1.4	7
Class III B	JU2593	36	2	35	1	2
Class III B	JU2593	36	3	27.5	1.3	4
Class III B	JU2593	36	7	26.25	2.57	18
Class III B	JU2593	36	8	17.5	3.25	26
Class III B	JU2593	36	6	16.25	4	24
Class III B	JU2593	36	10	12.5	1.7	17
Class III B	JU2593	36	12	16.4286	1.67	20
Class III B	JU2593	36	14	19	1.64	23
Class III B	JU2593	36	12	15.8333	1.5	18
Class III B	JU2593	36	6	27.5	1.83	11
Class III B	JU2593	36	3	77.5	1.67	5
Class III B	JU2593	36	10	11.6667	1.3	13
Class III B	JU2593	36	3	37.5	1.67	5
Class III B	JU2593	36	10	16.43	1.7	17
Class III B	JU2593	36	12	19	1.42	17
Class III B	JU2593	36	3	17.5	2.33	7
Class III B	JU751	36	7	16.25	2.86	20
Class III B	JU751	36	4	40	1.5	6
Class III B	JU751	36	10	10	2.2	22
Class III B	JU751	36	10	11.25	2.6	26
Class III B	JU751	36	4	42.5	4.75	19
Class III B	JU751	36	10	13	2.5	25
Class III B	JU751	36	12	14.2857	1.75	21
Class III B	JU751	36	8	21.25	2.75	22
Class III B	JU751	36	11	15	2.27	25
Class III B	JU751	36	8	20	2.63	21
Class III B	JU751	36	9	20	1.67	15
Class III B	JU751	36	7	22.5	2.71	19
Class III B	JU751	36	3	47.5	3	9
Class III B	JU751	36	5	75	1.6	8
Class III B	JU751	36	9	27	2	18
Class III B	JU751	36	5	20	1.2	6
Class III B	JU751	36	6	43.33	2.17	13
Class III B	NIC1832	36	4	15	4.5	18
Class III B	NIC1832	36	9	23	2.9	26
Class III B	NIC1832	36	9	15.7	2	18
Class III B	NIC1832	36	4	77.5	1.25	5
Class III B	NIC1832	36	11	10.63	2.82	31
Class III B	NIC1832	36	8	40	2.5	20
Class III B	NIC1832	36	14	12.5	1.79	25
Class III B	NIC1832	36	10	15	2.2	22
Class III B	NIC1832	36	10	20	1.8	18
Class III B	NIC1832	36	13	14.2857	1.54	20
Class III B	NIC1832	36	7	24.1667	1.43	10
Class III B	NIC1832	36	10	12	2	20
Class III B	NIC1832	36	12	20	1.5	18
Class III B	NIC1832	36	6	23.3333	2.83	17
Class III B	NIC1832	36	4	12.5	2.25	9
Class III B	NIC1832	36	10	15	1.4	14
Class III B	NIC1832	36	13	10.71	1.69	22
Class III B	NIC1832	36	12	11.25	1.5	18
