# Supplementary material for: Natural variation in the Caenorhabditis elegans egg-laying circuit modulates an intergenerational fitness trade-off
Source: eLife. 2024 Apr 2;12:RP88253. doi: 10.7554/eLife.88253 (PMC10987095; doi:10.7554/eLife.88253)
Supplement: Figure 6—source data 1. [file elife-88253-fig6-data1.xlsx]

## Sheet: Figure 6
Class	Strain	Individual	time between first egg in utero and first egg laying event (min)	time between first egg in utero and first egg laying event (hours)	number of eggs in utero at first egg laying event
Class I	JU3166	1	158	2.63333	3
Class I	JU3166	2	107	1.78333	5
Class I	JU3166	3	60	1	3
Class I	JU3166	4	95	1.58333	4
Class I	JU3166	5	95	1.58333	2
Class I	JU3166	6	170	2.83333	5
Class I	JU3166	7	125	2.08333	3
Class I	JU3166	8	90	1.5	2
Class I	JU3166	9	60	1	2
Class I	JU3166	10	150	2.5	6
Class I	JU3166	11	135	2.25	3
Class I	JU3166	12	105	1.75	5
Class I	JU3166	13	90	1.5	6
Class I	JU3166	14	120	2	4
Class I	JU3166	15	159	2.65	6
Class I	JU3166	16	136	2.26667	3
Class I	JU3166	18	60	1	4
Class I	JU3166	19	105	1.75	4
Class I	JU3166	20	104	1.73333	4
Class II	JU1200	2	138	2.3	7
Class II	JU1200	5	143	2.38333	5
Class II	JU1200	6	120	2	6
Class II	JU1200	7	120	2	5
Class II	JU1200	8	120	2	4
Class II	JU1200	10	90	1.5	5
Class II	JU1200	11	90	1.5	5
Class II	JU1200	14	180	3	6
Class II	JU1200	15	120	2	5
Class II	JU1200	16	90	1.5	3
Class II	JU1200	18	90	1.5	4
Class II	JU1200	19	540	9	8
Class II	JU1200	20	120	2	6
Class III A	JU440	1	130	2.16667	8
Class III A	JU440	2	90	1.5	7
Class III A	JU440	4	79	1.31667	6
Class III A	JU440	5	210	3.5	8
Class III A	JU440	6	90	1.5	9
Class III A	JU440	7	150	2.5	9
Class III A	JU440	8	210	3.5	7
Class III A	JU440	9	180	3	10
Class III A	JU440	10	30	0.5	7
Class III A	JU440	11	70	1.16667	6
Class III A	JU440	13	180	3	8
Class III A	JU440	15	60	1	3
Class III A	JU440	17	60	1	9
Class III A	JU440	18	120	2	6
Class III A	JU440	19	79	1.31667	8
Class III A	JU440	20	150	2.5	7
Class III A	JU2829	1	90	1.5	6
Class III A	JU2829	2	160	2.66667	9
Class III A	JU2829	3	189	3.15	9
Class III A	JU2829	4	195	3.25	8
Class III A	JU2829	5	210	3.5	11
Class III A	JU2829	6	160	2.66667	8
Class III A	JU2829	9	170	2.83333	9
Class III A	JU2829	10	160	2.66667	12
Class III A	JU2829	11	124	2.06667	6
Class III A	JU2829	13	249	4.15	11
Class III A	JU2829	14	122	2.03333	6
Class III A	JU2829	15	150	2.5	9
Class III A	JU2829	16	209	3.48333	11
Class III A	JU2829	17	360	6	17
Class III A	JU2829	18	210	3.5	8
Class III A	JU2829	19	223	3.71667	13
Class III A	JU2829	20	175	2.91667	10
Class III B	JU751	1	204	3.4	13
Class III B	JU751	2	289	4.81667	16
Class III B	JU751	3	263	4.38333	13
Class III B	JU751	4	325	5.41667	17
Class III B	JU751	5	355	5.91667	18
Class III B	JU751	6	162	2.7	12
Class III B	JU751	7	420	7	25
Class III B	JU751	8	330	5.5	18
Class III B	JU751	9	410	6.83333	15
Class III B	JU751	10	390	6.5	20
Class III B	JU751	11	330	5.5	14
Class III B	JU751	12	307	5.11667	17
Class III B	JU751	14	335	5.58333	12
Class III B	JU751	15	330	5.5	13
Class III B	JU751	16	355	5.91667	14
Class III B	JU751	17	383	6.38333	12
Class III B	JU751	18	600	10	17
Class III B	JU751	20	264	4.4	15
Class III B	JU2593	1	510	8.5	25
Class III B	JU2593	2	780	13	36
Class III B	JU2593	3	420	7	19
Class III B	JU2593	4	690	11.5	30
Class III B	JU2593	6	540	9	29
Class III B	JU2593	7	600	10	28
Class III B	JU2593	8	450	7.5	23
Class III B	JU2593	9	480	8	24
Class III B	JU2593	10	600	10	26
Class III B	JU2593	11	420	7	18
Class III B	JU2593	12	600	10	30
Class III B	JU2593	13	720	12	17
Class III B	JU2593	14	487	8.11667	19
Class III B	JU2593	15	615	10.25	27
Class III B	JU2593	16	750	12.5	33
Class III B	JU2593	19	540	9	25
Class III B	JU2593	20	490	8.16667	24
Class II	N2	2	157	2.61667	6
Class II	N2	3	165	2.75	6
Class II	N2	4	164	2.73333	8
Class II	N2	5	15	0.25	6
Class II	N2	6	162	2.7	6
Class II	N2	8	109	1.81667	4
Class II	N2	9	146	2.43333	7
Class II	N2	10	215	3.58333	7
Class II	N2	11	160	2.66667	4
Class II	N2	13	153	2.55	6
Class II	N2	14	197	3.28333	6
Class II	N2	15	103	1.71667	5
Class II	N2	16	156	2.6	4
Class II	N2	17	137	2.28333	5
Class II	N2	18	160	2.66667	5
Class II	N2	19	130	2.16667	6
Class II	N2	20	88	1.46667	5
Class II	JU1200	1	105	1.75	5
Class II	JU1200	3	127	2.11667	4
Class II	JU1200	4	127	2.11667	8
Class II	JU1200	5	104	1.73333	8
Class II	JU1200	6	130	2.16667	5
Class II	JU1200	7	109	1.81667	5
Class II	JU1200	8	138	2.3	6
Class II	JU1200	9	282	4.7	10
Class II	JU1200	10	147	2.45	3
Class I	QG2873	1	47	0.783333	4
Class I	QG2873	2	121	2.01667	4
Class I	QG2873	3	57	0.95	4
Class I	QG2873	4	136	2.26667	7
Class I	QG2873	5	121	2.01667	5
Class I	QG2873	6	57	0.95	3
Class I	QG2873	7	37	0.616667	2
Class I	QG2873	8	156	2.6	4
Class I	QG2873	9	57	0.95	4
Class I	QG2873	10	75	1.25	4
Class I	QG2873	11	65	1.08333	2
Class I	QG2873	12	75	1.25	3
Class I	QG2873	13	83	1.38333	3
Class I	QG2873	15	48	0.8	4
Class I	QG2873	16	69	1.15	2
Class I	QG2873	17	213	3.55	5
Class I	QG2873	18	98	1.63333	5
Class I	QG2873	19	70	1.16667	3
Class II	QX1430	1	68	1.13333	3
Class II	QX1430	2	100	1.66667	3
Class II	QX1430	3	65	1.08333	4
Class II	QX1430	4	130	2.16667	3
Class II	QX1430	5	113	1.88333	4
Class II	QX1430	6	93	1.55	4
Class II	QX1430	7	106	1.76667	3
Class II	QX1430	8	100	1.66667	5
Class II	QX1430	9	100	1.66667	2
Class II	QX1430	10	99	1.65	7
Class II	QX1430	11	100	1.66667	4
Class II	QX1430	12	166	2.76667	4
Class II	QX1430	13	106	1.76667	3
Class II	QX1430	14	88	1.46667	4
Class II	QX1430	16	95	1.58333	3
Class II	QX1430	17	96	1.6	4
Class II	QX1430	18	131	2.18333	6
Class II	QX1430	19	125	2.08333	2
Class II	QX1430	20	159	2.65	6
Class II	CB4856	1	103	1.71667	4
Class II	CB4856	2	137	2.28333	6
Class II	CB4856	3	166	2.76667	6
Class II	CB4856	4	44	0.733333	4
Class II	CB4856	5	195	3.25	4
Class II	CB4856	6	72	1.2	4
Class II	CB4856	7	135	2.25	5
Class II	CB4856	9	103	1.71667	4
Class II	CB4856	10	195	3.25	9
Class II	CB4856	11	193	3.21667	7
Class II	CB4856	12	187	3.11667	5
Class II	CB4856	13	127	2.11667	5
Class II	CB4856	14	220	3.66667	7
Class II	CB4856	15	192	3.2	5
Class II	CB4856	16	110	1.83333	4
Class II	CB4856	17	187	3.11667	7
Class II	CB4856	18	187	3.11667	4
Class II	CB4856	19	158	2.63333	7
Class II	CB4856	20	41	0.683333	3
Class III A	ED3005	1	250	4.16667	18
Class III A	ED3005	2	110	1.83333	8
Class III A	ED3005	3	65	1.08333	3
Class III A	ED3005	5	153	2.55	6
Class III A	ED3005	6	102	1.7	5
Class III A	ED3005	7	187	3.11667	12
Class III A	ED3005	8	102	1.7	4
Class III A	ED3005	9	249	4.15	14
Class III A	ED3005	10	397	6.61667	24
Class III A	ED3005	11	226	3.76667	12
Class III A	ED3005	12	109	1.81667	5
Class III A	ED3005	13	132	2.2	8
Class III A	ED3005	14	167	2.78333	8
Class III A	ED3005	15	180	3	14
Class III A	ED3005	16	113	1.88333	6
Class III A	ED3005	17	101	1.68333	5
Class III A	ED3005	18	101	1.68333	7
Class III A	ED3005	19	483	8.05	27
Class III A	ED3005	20	275	4.58333	18
Class III A	JU830	3	131	2.18333	7
Class III A	JU830	4	286	4.76667	15
Class III A	JU830	5	160	2.66667	7
Class III A	JU830	6	435	7.25	24
Class III A	JU830	7	223	3.71667	13
Class III A	JU830	8	343	5.71667	17
Class III A	JU830	9	247	4.11667	14
Class III A	JU830	10	197	3.28333	9
Class III A	JU830	11	106	1.76667	5
Class III A	JU830	12	196	3.26667	10
Class III A	JU830	13	140	2.33333	7
Class III A	JU830	14	347	5.78333	16
Class III A	JU830	15	374	6.23333	17
Class III A	JU830	16	512	8.53333	25
Class III A	JU830	17	285	4.75	14
Class III A	JU830	18	467	7.78333	17
Class III A	JU830	19	245	4.08333	13
Class III A	JU830	20	223	3.71667	10
Class III A	NIC1786	2	165	2.75	8
Class III A	NIC1786	3	163	2.71667	9
Class III A	NIC1786	4	110	1.83333	8
Class III A	NIC1786	5	164	2.73333	7
Class III A	NIC1786	6	137	2.28333	9
Class III A	NIC1786	7	41	0.683333	3
Class III A	NIC1786	8	265	4.41667	13
Class III A	NIC1786	9	140	2.33333	8
Class III A	NIC1786	11	134	2.23333	3
Class III A	NIC1786	12	275	4.58333	9
Class III A	NIC1786	13	224	3.73333	9
Class III A	NIC1786	14	163	2.71667	7
Class III A	NIC1786	15	171	2.85	6
Class III A	NIC1786	17	224	3.73333	5
Class III A	NIC1786	18	116	1.93333	1
Class III A	NIC1786	19	168	2.8	7
Class III A	NIC1786	20	218	3.63333	9
Class III B	JU2587	1	371	6.18333	24
Class III B	JU2587	2	141	2.35	6
Class III B	JU2587	3	180	3	11
Class III B	JU2587	4	232	3.86667	14
Class III B	JU2587	5	357	5.95	21
Class III B	JU2587	6	278	4.63333	12
Class III B	JU2587	7	437	7.28333	24
Class III B	JU2587	8	281	4.68333	14
Class III B	JU2587	9	378	6.3	21
Class III B	JU2587	10	184	3.06667	15
Class III B	JU2587	11	230	3.83333	14
Class III B	JU2587	12	165	2.75	9
Class III B	JU2587	13	315	5.25	25
Class III B	JU2587	14	148	2.46667	12
Class III B	JU2587	15	194	3.23333	15
Class III B	JU2587	16	231	3.85	15
Class III B	JU2587	17	312	5.2	18
Class III B	JU2587	18	208	3.46667	11
Class III B	JU2587	19	230	3.83333	13
Class III B	JU2587	20	226	3.76667	13
Class III B	NIC1832	1	170	2.83333	10
Class III B	NIC1832	2	313	5.21667	17
Class III B	NIC1832	3	166	2.76667	7
Class III B	NIC1832	4	167	2.78333	9
Class III B	NIC1832	5	282	4.7	11
Class III B	NIC1832	6	212	3.53333	13
Class III B	NIC1832	7	171	2.85	7
Class III B	NIC1832	8	255	4.25	10
Class III B	NIC1832	9	165	2.75	7
Class III B	NIC1832	10	177	2.95	9
Class III B	NIC1832	11	349	5.81667	16
Class III B	NIC1832	12	314	5.23333	16
Class III B	NIC1832	13	409	6.81667	20
Class III B	NIC1832	14	195	3.25	8
Class III B	NIC1832	15	237	3.95	11
Class III B	NIC1832	16	225	3.75	12
Class III B	NIC1832	17	178	2.96667	9
Class III B	NIC1832	18	385	6.41667	18
Class III B	NIC1832	19	200	3.33333	12
Class III B	NIC1832	20	232	3.86667	6
