# Supplementary material for: Natural variation in the Caenorhabditis elegans egg-laying circuit modulates an intergenerational fitness trade-off
Source: eLife. 2024 Apr 2;12:RP88253. doi: 10.7554/eLife.88253 (PMC10987095; doi:10.7554/eLife.88253)
Supplement: Figure 7—source data 1. [file elife-88253-fig7-data1.xlsx]

## Sheet: Figure 7B
Class	Strain	Treatment	Eggs laid per animal
Class II	JU1200	serotonin	5.6
Class II	JU1200	serotonin	2.75
Class II	JU1200	serotonin	3.4
Class II	JU1200	serotonin	3.75
Class II	JU1200	serotonin	3.2
Class II	JU1200	serotonin	4.75
Class II	JU1200	M9	0.2
Class II	JU1200	M9	0.333333
Class II	JU1200	M9	2.2
Class II	JU1200	M9	0
Class II	JU1200	M9	0
Class II	JU1200	M9	0
Class III B	JU751	serotonin	0
Class III B	JU751	serotonin	0.244998
Class III B	JU751	serotonin	0.489996
Class III B	JU751	serotonin	0
Class III B	JU751	serotonin	0.244998
Class III B	JU751	serotonin	0.391997
Class III B	JU751	M9	1.46999
Class III B	JU751	M9	2.28665
Class III B	JU751	M9	1.17599
Class III B	JU751	M9	1.25999
Class III B	JU751	M9	1.22499
Class III B	JU751	M9	0.979992
Class III B	JU2587	serotonin	0.576461
Class III B	JU2587	serotonin	0
Class III B	JU2587	serotonin	0
Class III B	JU2587	serotonin	0
Class III B	JU2587	serotonin	0.960769
Class III B	JU2587	serotonin	0
Class III B	JU2587	M9	0.960769
Class III B	JU2587	M9	1.20096
Class III B	JU2587	M9	1.09802
Class III B	JU2587	M9	0.240192
Class III B	JU2587	M9	1.44115
Class III B	JU2587	M9	1.28102
Class III A	NIC1786	serotonin	1.88457
Class III A	NIC1786	serotonin	2.19867
Class III A	NIC1786	serotonin	9.10876
Class III A	NIC1786	serotonin	3.53357
Class III A	NIC1786	serotonin	2.51276
Class III A	NIC1786	serotonin	6.12485
Class III A	NIC1786	M9	0
Class III A	NIC1786	M9	0
Class III A	NIC1786	M9	0
Class III A	NIC1786	M9	0
Class III A	NIC1786	M9	0.235571
Class III A	NIC1786	M9	0
Class III A	ED3005	serotonin	9.86133
Class III A	ED3005	serotonin	14.9769
Class III A	ED3005	serotonin	9.86133
Class III A	ED3005	serotonin	14.792
Class III A	ED3005	serotonin	15.7165
Class III A	ED3005	serotonin	9.61479
Class III A	ED3005	M9	0
Class III A	ED3005	M9	0.924499
Class III A	ED3005	M9	1.6641
Class III A	ED3005	M9	0.924499
Class III A	ED3005	M9	0
Class III A	ED3005	M9	0
Class III A	JU440	serotonin	6.95652
Class III A	JU440	serotonin	12.0551
Class III A	JU440	serotonin	11.3422
Class III A	JU440	serotonin	12.4764
Class III A	JU440	serotonin	13.3081
Class III A	JU440	serotonin	11.0397
Class III A	JU440	M9	1.0586
Class III A	JU440	M9	0.907372
Class III A	JU440	M9	4.2344
Class III A	JU440	M9	0.907372
Class III A	JU440	M9	2.72212
Class III A	JU440	M9	0.453686
Class II	QX1430	serotonin	5.64217
Class II	QX1430	serotonin	3.26652
Class II	QX1430	serotonin	2.37565
Class II	QX1430	serotonin	5.12249
Class II	QX1430	serotonin	5.79065
Class II	QX1430	serotonin	1.78174
Class II	QX1430	M9	2.44989
Class II	QX1430	M9	0.890869
Class II	QX1430	M9	0.593912
Class II	QX1430	M9	0.534521
Class II	QX1430	M9	1.42539
Class II	QX1430	M9	1.3363
Class II	N2	serotonin	7.8
Class II	N2	serotonin	10.2
Class II	N2	serotonin	7.4
Class II	N2	serotonin	8.8
Class II	N2	serotonin	9.4
Class II	N2	serotonin	7.4
Class II	N2	M9	2.5
Class II	N2	M9	4.16667
Class II	N2	M9	5.6
Class II	N2	M9	4
Class II	N2	M9	6
Class II	N2	M9	3
Class III B	NIC1832	serotonin	0.559995
Class III B	NIC1832	serotonin	0.326664
Class III B	NIC1832	serotonin	0.195998
Class III B	NIC1832	serotonin	0.326664
Class III B	NIC1832	serotonin	0
Class III B	NIC1832	M9	0.734994
Class III B	NIC1832	M9	0.979992
Class III B	NIC1832	M9	1.14332
Class III B	NIC1832	M9	4.16497
Class III B	NIC1832	M9	0.326664
Class III B	NIC1832	M9	0.979992
Class III B	JU2593	serotonin	3.26664
Class III B	JU2593	serotonin	0
Class III B	JU2593	serotonin	1.28102
Class III B	JU2593	serotonin	0.480384
Class III A	JU830	serotonin	7.06714
Class III A	JU830	serotonin	8.29211
Class III A	JU830	serotonin	4.89988
Class III A	JU830	serotonin	6.596
Class III A	JU830	serotonin	6.97291
Class III A	JU830	serotonin	13.192
Class III A	JU830	M9	0.942285
Class III A	JU830	M9	0.314095
Class III A	JU830	M9	0.62819
Class III A	JU830	M9	5.65371
Class III A	JU830	M9	1.3192
Class III A	JU830	M9	1.69611
Class III A	JU2829	serotonin	0
Class III A	JU2829	serotonin	0.693374
Class III A	JU2829	serotonin	0.3698
Class III A	JU2829	serotonin	0.616333
Class III A	JU2829	serotonin	0
Class III A	JU2829	serotonin	0.616333
Class III A	JU2829	M9	7.70416
Class III A	JU2829	M9	0.924499
Class III A	JU2829	M9	3.92912
Class III A	JU2829	M9	3.23575
Class III A	JU2829	M9	4.85362
Class III A	JU2829	M9	3.08166
Class II	CB4856	serotonin	5.24973
Class II	CB4856	serotonin	7.58294
Class II	CB4856	serotonin	9.6245
Class II	CB4856	serotonin	2.8436
Class II	CB4856	serotonin	4.81225
Class II	CB4856	serotonin	3.49982
Class II	CB4856	M9	0
Class II	CB4856	M9	0.699964
Class II	CB4856	M9	0.874954
Class II	CB4856	M9	0.874954
Class II	CB4856	M9	1.45826
Class II	CB4856	M9	0
Class II	N2	serotonin	19.5
Class II	N2	serotonin	1
Class II	N2	serotonin	16
Class II	N2	serotonin	16.3333
Class II	N2	serotonin	19.5
Class II	N2	serotonin	11
Class II	N2	M9	6
Class II	N2	M9	0
Class II	N2	M9	1
Class II	N2	M9	7
Class II	N2	M9	5
Class II	N2	M9	0
Class III B	NIC1832	serotonin	0.195998
Class III B	NIC1832	serotonin	0
Class III B	NIC1832	serotonin	0.653328
Class III B	NIC1832	serotonin	0.783993
Class III B	NIC1832	serotonin	0.587995
Class III B	NIC1832	serotonin	0.195998
Class III B	NIC1832	M9	0.244998
Class III B	NIC1832	M9	0
Class III B	NIC1832	M9	0.979992
Class III B	NIC1832	M9	0
Class III B	NIC1832	M9	0.150768
Class III B	NIC1832	M9	0.653328
Class III B	JU2593	serotonin	0
Class III B	JU2593	serotonin	0.640512
Class III B	JU2593	serotonin	0
Class III B	JU2593	serotonin	1.20096
Class III B	JU2593	serotonin	0
Class III B	JU2593	serotonin	0
Class III B	JU2593	M9	0
Class III B	JU2593	M9	0
Class III B	JU2593	M9	0
Class III B	JU2593	M9	0
Class III B	JU2593	M9	0
Class III B	JU2593	M9	0
Class III A	JU830	serotonin	13.192
Class III A	JU830	serotonin	12.8779
Class III A	JU830	serotonin	14.6054
Class III A	JU830	serotonin	15.3121
Class III A	JU830	serotonin	17.1967
Class III A	JU830	serotonin	13.349
Class III A	JU830	M9	1.13074
Class III A	JU830	M9	3.9576
Class III A	JU830	M9	0.62819
Class III A	JU830	M9	0
Class III A	JU830	M9	2.82686
Class III A	JU830	M9	8.00942
Class III A	JU2829	serotonin	0
Class III A	JU2829	serotonin	0
Class III A	JU2829	serotonin	0
Class III A	JU2829	serotonin	0.231125
Class III A	JU2829	serotonin	0.132071
Class III A	JU2829	serotonin	0
Class III A	JU2829	M9	6.00924
Class III A	JU2829	M9	4.6225
Class III A	JU2829	M9	3.698
Class III A	JU2829	M9	2.15716
Class III A	JU2829	M9	4.93066
Class III A	JU2829	M9	2.7735
Class II	CB4856	serotonin	3.93729
Class II	CB4856	serotonin	12.2494
Class II	CB4856	serotonin	6.41633
Class II	CB4856	serotonin	8.74954
Class II	CB4856	serotonin	8.53081
Class II	CB4856	serotonin	5.94969
Class II	CB4856	M9	0
Class II	CB4856	M9	0
Class II	CB4856	M9	0
Class II	CB4856	M9	1.02078
Class II	CB4856	M9	0
Class II	CB4856	M9	0
Class II	JU1200	serotonin	6
Class II	JU1200	serotonin	11
Class II	JU1200	serotonin	13.5
Class II	JU1200	serotonin	8.66667
Class II	JU1200	serotonin	9.25
Class II	JU1200	serotonin	9.33333
Class II	JU1200	M9	2
Class II	JU1200	M9	2
Class II	JU1200	M9	4
Class II	JU1200	M9	1.5
Class II	JU1200	M9	3.14286
Class III B	JU751	serotonin	1.46999
Class III B	JU751	serotonin	1.30666
Class III B	JU751	serotonin	1.30666
Class III B	JU751	serotonin	0.326664
Class III B	JU751	serotonin	0.979992
Class III B	JU751	serotonin	0.326664
Class III B	JU751	M9	3.67497
Class III B	JU751	M9	1.46999
Class III B	JU751	M9	4.70396
Class III B	JU751	M9	2.12332
Class III B	JU751	M9	0
Class III B	JU751	M9	4.24663
Class III B	JU2587	serotonin	1.28102
Class III B	JU2587	serotonin	0.480384
Class III B	JU2587	serotonin	0.960769
Class III B	JU2587	serotonin	1.60128
Class III B	JU2587	serotonin	1.53723
Class III B	JU2587	serotonin	0.960769
Class III B	JU2587	M9	2.88231
Class III B	JU2587	M9	3.20256
Class III B	JU2587	M9	3.84307
Class III B	JU2587	M9	1.60128
Class III B	JU2587	M9	9.92794
Class III B	JU2587	M9	2.56205
Class III A	NIC1786	serotonin	2.82686
Class III A	NIC1786	serotonin	3.45505
Class III A	NIC1786	serotonin	2.82686
Class III A	NIC1786	serotonin	6.596
Class III A	NIC1786	serotonin	0.942285
Class III A	NIC1786	serotonin	0.471143
Class III A	NIC1786	M9	0
Class III A	NIC1786	M9	0
Class III A	NIC1786	M9	0.235571
Class III A	NIC1786	M9	0
Class III A	NIC1786	M9	0
Class III A	ED3005	serotonin	16.1787
Class III A	ED3005	serotonin	21.2635
Class III A	ED3005	serotonin	22.6502
Class III A	ED3005	serotonin	21.8798
Class III A	ED3005	serotonin	19.8767
Class III A	ED3005	serotonin	18.1202
Class III A	ED3005	M9	1.38675
Class III A	ED3005	M9	0
Class III A	ED3005	M9	0.924499
Class III A	ED3005	M9	0
Class III A	ED3005	M9	0.46225
Class III A	ED3005	M9	2.56805
Class III A	JU440	serotonin	13.6106
Class III A	JU440	serotonin	9.52741
Class III A	JU440	serotonin	7.48582
Class III A	JU440	serotonin	9.07372
Class III A	JU440	serotonin	11.1153
Class III A	JU440	serotonin	6.04915
Class III A	JU440	M9	1.81474
Class III A	JU440	M9	0.453686
Class III A	JU440	M9	1.81474
Class III A	JU440	M9	0
Class III A	JU440	M9	5.14178
Class III A	JU440	M9	3.1758
Class II	QX1430	serotonin	10.245
Class II	QX1430	serotonin	1.3363
Class II	QX1430	serotonin	6.68151
Class II	QX1430	serotonin	8.31477
Class II	QX1430	serotonin	6.68151
Class II	QX1430	serotonin	3.56347
Class II	QX1430	M9	5.64217
Class II	QX1430	M9	6.53304
Class II	QX1430	M9	5.34521
Class II	QX1430	M9	5.98155
Class II	QX1430	M9	2.22717
Class II	QX1430	M9	5.64217
Class II	JU1200	serotonin	8.5
Class II	JU1200	serotonin	9.75
Class II	JU1200	serotonin	9.66667
Class II	JU1200	serotonin	9.25
Class II	JU1200	serotonin	9.83333
Class II	JU1200	serotonin	6.875
Class II	JU1200	M9	1.08333
Class II	JU1200	M9	0
Class II	JU1200	M9	2.5
Class II	JU1200	M9	0.25
Class II	JU1200	M9	1.28571
Class II	JU1200	M9	1.25
Class III B	JU2593	serotonin	1.17599
Class III B	JU2593	serotonin	0.419997
Class III B	JU2593	serotonin	0.244998
Class III B	JU2593	serotonin	0.217776
Class III B	JU2593	serotonin	0.244998
Class III B	JU2593	M9	0
Class III B	JU2593	M9	0
Class III B	JU2593	M9	0
Class III B	JU2593	M9	0.391997
Class III B	JU2593	M9	0
Class III B	JU2593	M9	0
Class II	N2	M9	0.5
Class II	N2	M9	1.75
Class II	N2	M9	0
Class II	N2	serotonin	3.5
Class II	N2	serotonin	8.25
Class II	N2	serotonin	8
Class II	N2	M9	0
Class II	N2	M9	1.46999
Class II	N2	M9	0.979992
Class II	N2	serotonin	6.20661
Class II	N2	serotonin	9.79992
Class II	N2	serotonin	10.2899
Class II	QX1430	M9	2.88231
Class II	QX1430	M9	1.28102
Class II	QX1430	M9	0.960769
Class II	QX1430	serotonin	10.0881
Class II	QX1430	serotonin	5.76461
Class II	QX1430	serotonin	7.68615
Class II	QX1430	M9	1.57048
Class II	QX1430	M9	0.942285
Class II	QX1430	M9	1.88457
Class II	QX1430	serotonin	6.596
Class II	QX1430	serotonin	5.02552
Class II	QX1430	serotonin	6.12485
Class I	JU3166	M9	4.6225
Class I	JU3166	M9	4.16025
Class I	JU3166	M9	3.698
Class I	JU3166	serotonin	13.5593
Class I	JU3166	serotonin	16.1787
Class I	JU3166	serotonin	10.7858
Class I	JU3166	M9	4.83932
Class I	JU3166	M9	2.1172
Class I	JU3166	M9	2.1172
Class I	JU3166	serotonin	7.56144
Class I	JU3166	serotonin	9.9811
Class I	JU3166	serotonin	10.586
Class I	QG2873	M9	0
Class I	QG2873	M9	4.15739
Class I	QG2873	M9	1.78174
Class I	QG2873	serotonin	10.0965
Class I	QG2873	serotonin	7.4239
Class I	QG2873	serotonin	5.34521
Class I	QG2873	M9	0
Class I	QG2873	M9	1.34178
Class I	QG2873	M9	0
Class I	QG2873	serotonin	5.81439
Class I	QG2873	serotonin	7.75252
Class I	QG2873	serotonin	5.36713
Class II	N2	M9	1.25
Class II	N2	M9	2
Class II	N2	M9	1.5
Class II	N2	serotonin	7.75
Class II	N2	serotonin	9.66667
Class II	N2	serotonin	10.25
Class II	N2	M9	4.40996
Class II	N2	M9	1.63332
Class II	N2	M9	4.24663
Class II	N2	serotonin	6.20661
Class II	N2	serotonin	12.1519
Class II	N2	serotonin	8.32993
Class II	QX1430	M9	3.65092
Class II	QX1430	M9	3.84307
Class II	QX1430	M9	3.36269
Class II	QX1430	serotonin	6.0048
Class II	QX1430	serotonin	12.9704
Class II	QX1430	serotonin	10.5685
Class II	QX1430	M9	3.06243
Class II	QX1430	M9	4.39733
Class II	QX1430	M9	3.14095
Class II	QX1430	serotonin	10.1296
Class II	QX1430	serotonin	7.85238
Class II	QX1430	serotonin	6.78445
Class I	JU3166	M9	6.70262
Class I	JU3166	M9	7.39599
Class I	JU3166	M9	4.31433
Class I	JU3166	serotonin	10.4777
Class I	JU3166	serotonin	14.1757
Class I	JU3166	serotonin	19.4145
Class I	JU3166	M9	3.32703
Class I	JU3166	M9	0.907372
Class I	JU3166	M9	3.93195
Class I	JU3166	serotonin	14.0643
Class I	JU3166	serotonin	14.2155
Class I	JU3166	serotonin	16.9376
Class I	QG2873	M9	1.55902
Class I	QG2873	M9	2.67261
Class I	QG2873	M9	2.07869
Class I	QG2873	serotonin	11.8782
Class I	QG2873	serotonin	8.90869
Class I	QG2873	serotonin	11.8782
Class I	QG2873	M9	5.36713
Class I	QG2873	M9	2.93914
Class I	QG2873	M9	3.22028
Class I	QG2873	serotonin	1.78904
Class I	QG2873	serotonin	6.70891
Class I	QG2873	serotonin	8.27432
Class II	N2	M9	2.66667
Class II	N2	M9	3
Class II	N2	M9	2.83333
Class II	N2	imipramine	13.8
Class II	N2	imipramine	11.8
Class II	N2	imipramine	12.8
Class III A	JU440	M9	0
Class III A	JU440	M9	0
Class III A	JU440	M9	0
Class III A	JU440	imipramine	12.2857
Class III A	JU440	imipramine	5.75
Class III A	JU440	imipramine	8.75
Class II	CB4856	M9	0
Class II	CB4856	M9	1.63332
Class II	CB4856	M9	0.653328
Class II	CB4856	imipramine	1.95998
Class II	CB4856	imipramine	7.59494
Class II	CB4856	imipramine	9.40792
Class III A	NIC1786	M9	0
Class III A	NIC1786	M9	0
Class III A	NIC1786	M9	0
Class III A	NIC1786	imipramine	18.8648
Class III A	NIC1786	imipramine	11.5639
Class III A	NIC1786	imipramine	14.9449
Class II	JU1200	M9	3.84307
Class II	JU1200	M9	7.92634
Class II	JU1200	M9	1.92154
Class II	JU1200	imipramine	18.0624
Class II	JU1200	imipramine	12.9704
Class II	JU1200	imipramine	15.7566
Class III A B	NIC1832	M9	0.240192
Class III A B	NIC1832	M9	0
Class III A B	NIC1832	M9	0
Class III A B	NIC1832	imipramine	8.16653
Class III A B	NIC1832	imipramine	7.89965
Class III A B	NIC1832	imipramine	7.92634
Class III A B	JU751	M9	0.706714
Class III A B	JU751	M9	0.376914
Class III A B	JU751	M9	0.471143
Class III A B	JU751	imipramine	13.192
Class III A B	JU751	imipramine	14.1343
Class III A B	JU751	imipramine	10.742
Class III A B	JU2593	M9	0
Class III A B	JU2593	M9	0
Class III A B	JU2593	M9	0.471143
Class III A B	JU2593	imipramine	6.596
Class III A B	JU2593	imipramine	5.88928
Class III A B	JU2593	imipramine	6.2819
Class II	QX1430	M9	1.38675
Class II	QX1430	M9	3.698
Class II	QX1430	M9	8.32049
Class II	QX1430	imipramine	15.7165
Class II	QX1430	imipramine	17.1957
Class II	QX1430	imipramine	17.5655
Class III A B	JU2587	M9	2.15716
Class III A B	JU2587	M9	2.4037
Class III A B	JU2587	M9	1.15562
Class III A B	JU2587	imipramine	8.78274
Class III A B	JU2587	imipramine	10.4777
Class III A B	JU2587	imipramine	13.8675
Class III A	ED3005	M9	9.75425
Class III A	ED3005	M9	7.8034
Class III A	ED3005	M9	6.74048
Class III A	ED3005	imipramine	16.3327
Class III A	ED3005	imipramine	16.0302
Class III A	ED3005	imipramine	15.7883
Class III A	JU2829	M9	2.41966
Class III A	JU2829	M9	2.54064
Class III A	JU2829	M9	2.72212
Class III A	JU2829	imipramine	9.07372
Class III A	JU2829	imipramine	7.71267
Class III A	JU2829	imipramine	8.16635
Class III A	JU830	M9	0.178174
Class III A	JU830	M9	1.42539
Class III A	JU830	M9	1.3363
Class III A	JU830	imipramine	12.4722
Class III A	JU830	imipramine	15.7811
Class III A	JU830	imipramine	12.6949
Class II	N2	M9	4.14286
Class II	N2	M9	2.66667
Class II	N2	M9	4.2
Class II	N2	imipramine	13
Class II	N2	imipramine	12
Class II	N2	imipramine	11.4
Class III A	JU440	M9	0.5
Class III A	JU440	M9	0
Class III A	JU440	M9	0
Class III A	JU440	imipramine	6.4
Class III A	JU440	imipramine	10
Class III A	JU440	imipramine	10.25
Class II	CB4856	M9	0
Class II	CB4856	M9	0
Class II	CB4856	M9	0
Class II	CB4856	imipramine	7.34994
Class II	CB4856	imipramine	8.62393
Class II	CB4856	imipramine	6.12495
Class III A	NIC1786	M9	0
Class III A	NIC1786	M9	0
Class III A	NIC1786	M9	0
Class III A	NIC1786	imipramine	15.8759
Class III A	NIC1786	imipramine	18.0318
Class III A	NIC1786	imipramine	18.4565
Class II	JU1200	M9	5.62736
Class II	JU1200	M9	3.1225
Class II	JU1200	M9	3.26661
Class II	JU1200	imipramine	13.3135
Class II	JU1200	imipramine	12.2978
Class II	JU1200	imipramine	13.2106
Class III A B	NIC1832	M9	0.640512
Class III A B	NIC1832	M9	0
Class III A B	NIC1832	M9	0
Class III A B	NIC1832	imipramine	9.41553
Class III A B	NIC1832	imipramine	9.2474
Class III A B	NIC1832	imipramine	7.92634
Class III A B	JU751	M9	0.706714
Class III A B	JU751	M9	1.88457
Class III A B	JU751	M9	1.88457
Class III A B	JU751	imipramine	10.742
Class III A B	JU751	imipramine	11.3074
Class III A B	JU751	imipramine	12.4382
Class III A B	JU2593	M9	0.565371
Class III A B	JU2593	M9	0
Class III A B	JU2593	M9	0.376914
Class III A B	JU2593	imipramine	7.77385
Class III A B	JU2593	imipramine	7.34982
Class III A B	JU2593	imipramine	5.65371
Class II	QX1430	M9	5.08475
Class II	QX1430	M9	3.46687
Class II	QX1430	M9	5.3621
Class II	QX1430	imipramine	14.4222
Class II	QX1430	imipramine	18.1202
Class II	QX1430	imipramine	14.792
Class III A B	JU2587	M9	3.5131
Class III A B	JU2587	M9	0.924499
Class III A B	JU2587	M9	1.38675
Class III A B	JU2587	imipramine	9.8228
Class III A B	JU2587	imipramine	15.2542
Class III A B	JU2587	imipramine	10.6317
Class III A	ED3005	M9	3.62949
Class III A	ED3005	M9	5.31461
Class III A	ED3005	M9	4.53686
Class III A	ED3005	imipramine	13.4972
Class III A	ED3005	imipramine	13.913
Class III A	ED3005	imipramine	20.3251
Class III A	JU2829	M9	1.36106
Class III A	JU2829	M9	0.544423
Class III A	JU2829	M9	1.36106
Class III A	JU2829	imipramine	9.9811
Class III A	JU2829	imipramine	8.62004
Class III A	JU2829	imipramine	7.71267
Class III A	JU830	M9	0.593912
Class III A	JU830	M9	1.06904
Class III A	JU830	M9	0
Class III A	JU830	imipramine	14.0757
Class III A	JU830	imipramine	13.5857
Class III A	JU830	imipramine	14.2539
Class II	N2	M9	0.5
Class II	N2	M9	1.75
Class II	N2	M9	0
Class II	N2	imipramine	12.6667
Class II	N2	imipramine	14.5
Class II	N2	imipramine	15
Class II	N2	M9	0
Class II	N2	M9	1.46999
Class II	N2	M9	0.979992
Class II	N2	imipramine	16.6599
Class II	N2	imipramine	12.4132
Class II	N2	imipramine	12.2499
Class II	QX1430	M9	2.88231
Class II	QX1430	M9	1.28102
Class II	QX1430	M9	0.960769
Class II	QX1430	imipramine	16.6533
Class II	QX1430	imipramine	12.2498
Class II	QX1430	imipramine	13.1305
Class II	QX1430	M9	1.57048
Class II	QX1430	M9	0.942285
Class II	QX1430	M9	1.88457
Class II	QX1430	imipramine	15.0766
Class II	QX1430	imipramine	11.7786
Class II	QX1430	imipramine	15.0766
Class I	JU3166	M9	4.6225
Class I	JU3166	M9	4.16025
Class I	JU3166	M9	3.698
Class I	JU3166	imipramine	11.094
Class I	JU3166	imipramine	13.2512
Class I	JU3166	imipramine	12.943
Class I	JU3166	M9	4.83932
Class I	JU3166	M9	2.1172
Class I	JU3166	M9	2.1172
Class I	JU3166	imipramine	11.1153
Class I	JU3166	imipramine	11.7958
Class I	JU3166	imipramine	14.2155
Class I	QG2873	M9	0
Class I	QG2873	M9	4.15739
Class I	QG2873	M9	1.78174
Class I	QG2873	imipramine	11.5813
Class I	QG2873	imipramine	8.01782
Class I	QG2873	imipramine	10.245
Class I	QG2873	M9	0
Class I	QG2873	M9	1.34178
Class I	QG2873	M9	0
Class I	QG2873	imipramine	12.8215
Class I	QG2873	imipramine	8.64704
Class I	QG2873	imipramine	10.7343
Class II	N2	M9	1.25
Class II	N2	M9	2
Class II	N2	M9	1.5
Class II	N2	imipramine	17.75
Class II	N2	imipramine	15.8
Class II	N2	imipramine	17
Class II	N2	M9	4.40996
Class II	N2	M9	1.63332
Class II	N2	M9	4.24663
Class II	N2	imipramine	10.7799
Class II	N2	imipramine	15.6799
Class II	N2	imipramine	15.3532
Class II	QX1430	M9	3.65092
Class II	QX1430	M9	3.84307
Class II	QX1430	M9	3.36269
Class II	QX1430	imipramine	12.8102
Class II	QX1430	imipramine	10.7606
Class II	QX1430	imipramine	10.5685
Class II	QX1430	M9	3.06243
Class II	QX1430	M9	4.39733
Class II	QX1430	M9	3.14095
Class II	QX1430	imipramine	13.5061
Class II	QX1430	imipramine	16.3329
Class II	QX1430	imipramine	12.2497
Class I	JU3166	M9	6.70262
Class I	JU3166	M9	7.39599
Class I	JU3166	M9	4.31433
Class I	JU3166	imipramine	15.1002
Class I	JU3166	imipramine	11.8336
Class I	JU3166	imipramine	13.7134
Class I	JU3166	M9	3.32703
Class I	JU3166	M9	0.907372
Class I	JU3166	M9	3.93195
Class I	JU3166	imipramine	4.53686
Class I	JU3166	imipramine	9.67864
Class I	JU3166	imipramine	13.8374
Class I	QG2873	M9	1.55902
Class I	QG2873	M9	2.67261
Class I	QG2873	M9	2.07869
Class I	QG2873	imipramine	10.1559
Class I	QG2873	imipramine	12.4722
Class I	QG2873	imipramine	8.46325
Class I	QG2873	M9	5.36713
Class I	QG2873	M9	2.93914
Class I	QG2873	M9	3.22028
Class I	QG2873	imipramine	11.6288
Class I	QG2873	imipramine	5.96347
Class I	QG2873	imipramine	8.05069
Class II	N2	M9	0
Class II	N2	M9	0.75
Class II	N2	M9	0
Class II	N2	M9	5.33333
Class II	N2	M9	1.5
Class II	N2	M9	2.8
Class II	N2	fluoxetine	20.25
Class II	N2	fluoxetine	26
Class II	N2	fluoxetine	18
Class II	N2	fluoxetine	20.3333
Class II	N2	fluoxetine	18.25
Class II	N2	fluoxetine	17.8
Class III B	NIC1832	M9	1.46999
Class III B	NIC1832	M9	0
Class III B	NIC1832	M9	0
Class III B	NIC1832	M9	0
Class III B	NIC1832	M9	0
Class III B	NIC1832	M9	0
Class III B	NIC1832	fluoxetine	10.4532
Class III B	NIC1832	fluoxetine	8.32993
Class III B	NIC1832	fluoxetine	12.4132
Class III B	NIC1832	fluoxetine	12.0049
Class III B	NIC1832	fluoxetine	9.40792
Class III B	NIC1832	fluoxetine	11.7599
Class III B	JU2593	M9	0.384307
Class III B	JU2593	M9	0
Class III B	JU2593	M9	0.960769
Class III B	JU2593	M9	0
Class III B	JU2593	M9	0
Class III B	JU2593	M9	0
Class III B	JU2593	fluoxetine	8.40673
Class III B	JU2593	fluoxetine	11.1449
Class III B	JU2593	fluoxetine	10.0881
Class III B	JU2593	fluoxetine	9.28743
Class III B	JU2593	fluoxetine	13.4508
Class III B	JU2593	fluoxetine	10.5685
Class III A	JU830	M9	2.82686
Class III A	JU830	M9	18.8457
Class III A	JU830	M9	1.88457
Class III A	JU830	M9	0
Class III A	JU830	M9	0
Class III A	JU830	M9	0.942285
Class III A	JU830	fluoxetine	5.33962
Class III A	JU830	fluoxetine	17.9034
Class III A	JU830	fluoxetine	11.3074
Class III A	JU830	fluoxetine	16.49
Class III A	JU830	fluoxetine	13.8987
Class III A	JU830	fluoxetine	15.7048
Class III A	JU2829	M9	6.77966
Class III A	JU2829	M9	0
Class III A	JU2829	M9	0
Class III A	JU2829	M9	1.38675
Class III A	JU2829	M9	2.15716
Class III A	JU2829	M9	3.23575
Class III A	JU2829	fluoxetine	17.5655
Class III A	JU2829	fluoxetine	15.1618
Class III A	JU2829	fluoxetine	15.1002
Class III A	JU2829	fluoxetine	17.2573
Class III A	JU2829	fluoxetine	19.4145
Class III A	JU2829	fluoxetine	13.5593
Class II	CB4856	M9	0
Class II	CB4856	M9	0
Class II	CB4856	M9	0.291651
Class II	CB4856	M9	0
Class II	CB4856	M9	0
Class II	CB4856	M9	0
Class II	CB4856	fluoxetine	15.7492
Class II	CB4856	fluoxetine	10.9369
Class II	CB4856	fluoxetine	15.895
Class II	CB4856	fluoxetine	16.1867
Class II	CB4856	fluoxetine	13.416
Class II	CB4856	fluoxetine	15.1659
Class II	JU1200	M9	0.6
Class II	JU1200	M9	0.5
Class II	JU1200	M9	0
Class II	JU1200	M9	1.25
Class II	JU1200	M9	0.5
Class II	JU1200	M9	1
Class II	JU1200	fluoxetine	16.2
Class II	JU1200	fluoxetine	15.2
Class II	JU1200	fluoxetine	15.25
Class II	JU1200	fluoxetine	15
Class II	JU1200	fluoxetine	15
Class II	JU1200	fluoxetine	15
Class III B	JU751	M9	0
Class III B	JU751	M9	0.653328
Class III B	JU751	M9	0.391997
Class III B	JU751	M9	0
Class III B	JU751	M9	0
Class III B	JU751	M9	0.979992
Class III B	JU751	fluoxetine	14.6999
Class III B	JU751	fluoxetine	17.6399
Class III B	JU751	fluoxetine	13.3279
Class III B	JU751	fluoxetine	13.2299
Class III B	JU751	fluoxetine	14.9449
Class III B	JU751	fluoxetine	11.2699
Class III B	JU2587	M9	0.720576
Class III B	JU2587	M9	0.640512
Class III B	JU2587	M9	0.480384
Class III B	JU2587	M9	0
Class III B	JU2587	M9	1.60128
Class III B	JU2587	M9	1.44115
Class III B	JU2587	fluoxetine	10.3283
Class III B	JU2587	fluoxetine	15.9488
Class III B	JU2587	fluoxetine	10.5685
Class III B	JU2587	fluoxetine	8.16653
Class III B	JU2587	fluoxetine	13.4508
Class III B	JU2587	fluoxetine	12.9704
Class III A	NIC1786	M9	0
Class III A	NIC1786	M9	0
Class III A	NIC1786	M9	0
Class III A	NIC1786	M9	0
Class III A	NIC1786	M9	0
Class III A	NIC1786	M9	0
Class III A	NIC1786	fluoxetine	12.4382
Class III A	NIC1786	fluoxetine	12.7208
Class III A	NIC1786	fluoxetine	19.4739
Class III A	NIC1786	fluoxetine	16.9611
Class III A	NIC1786	fluoxetine	16.9611
Class III A	NIC1786	fluoxetine	19.788
Class III A	ED3005	M9	1.32071
Class III A	ED3005	M9	0
Class III A	ED3005	M9	0
Class III A	ED3005	M9	1.38675
Class III A	ED3005	M9	1.54083
Class III A	ED3005	M9	2.7735
Class III A	ED3005	fluoxetine	12.5732
Class III A	ED3005	fluoxetine	8.01233
Class III A	ED3005	fluoxetine	14.4838
Class III A	ED3005	fluoxetine	17.0108
Class III A	ED3005	fluoxetine	9.70724
Class III A	ED3005	fluoxetine	12.0185
Class III A	JU440	M9	2.1172
Class III A	JU440	M9	0.453686
Class III A	JU440	M9	1.36106
Class III A	JU440	M9	2.49527
Class III A	JU440	M9	0.226843
Class III A	JU440	M9	0.907372
Class III A	JU440	fluoxetine	12.7032
Class III A	JU440	fluoxetine	11.9773
Class III A	JU440	fluoxetine	16.9376
Class III A	JU440	fluoxetine	19.0548
Class III A	JU440	fluoxetine	14.518
Class III A	JU440	fluoxetine	12.0983
Class II	QX1430	M9	1.3363
Class II	QX1430	M9	7.7951
Class II	QX1430	M9	2.96956
Class II	QX1430	M9	4.45434
Class II	QX1430	M9	0.890869
Class II	QX1430	M9	0.445434
Class II	QX1430	fluoxetine	16.9265
Class II	QX1430	fluoxetine	20.49
Class II	QX1430	fluoxetine	18.7082
Class II	QX1430	fluoxetine	18.1143
Class II	QX1430	fluoxetine	16.3326
Class II	QX1430	fluoxetine	17.3719
Class II	N2	M9	3.18182
Class II	N2	M9	5.2
Class II	N2	M9	3.41667
Class II	N2	M9	3.28571
Class II	N2	M9	3.5
Class II	N2	M9	2
Class II	N2	fluoxetine	21
Class II	N2	fluoxetine	16
Class II	N2	fluoxetine	23.75
Class II	N2	fluoxetine	21.5
Class II	N2	fluoxetine	19
Class II	N2	fluoxetine	20.6667
Class III B	NIC1832	M9	0
Class III B	NIC1832	M9	0
Class III B	NIC1832	M9	0.244998
Class III B	NIC1832	M9	1.19777
Class III B	NIC1832	M9	0.489996
Class III B	NIC1832	M9	0
Class III B	NIC1832	fluoxetine	10.2899
Class III B	NIC1832	fluoxetine	9.79992
Class III B	NIC1832	fluoxetine	9.14659
Class III B	NIC1832	fluoxetine	7.51327
Class III B	NIC1832	fluoxetine	13.2299
Class III B	NIC1832	fluoxetine	7.83993
Class III B	JU2593	M9	0
Class III B	JU2593	M9	0
Class III B	JU2593	M9	0.960769
Class III B	JU2593	M9	0
Class III B	JU2593	M9	0
Class III B	JU2593	M9	0
Class III B	JU2593	fluoxetine	8.00641
Class III B	JU2593	fluoxetine	4.80384
Class III B	JU2593	fluoxetine	7.04564
Class III B	JU2593	fluoxetine	5.1241
Class III B	JU2593	fluoxetine	4.56365
Class III B	JU2593	fluoxetine	5.44436
Class III A	JU830	M9	0.538449
Class III A	JU830	M9	3.76914
Class III A	JU830	M9	2.51276
Class III A	JU830	M9	1.41343
Class III A	JU830	M9	0
Class III A	JU830	M9	0
Class III A	JU830	fluoxetine	4.71143
Class III A	JU830	fluoxetine	14.1343
Class III A	JU830	fluoxetine	9.10876
Class III A	JU830	fluoxetine	13.192
Class III A	JU830	fluoxetine	6.2819
Class III A	JU830	fluoxetine	8.79466
Class III A	JU2829	M9	7.16487
Class III A	JU2829	M9	6.93374
Class III A	JU2829	M9	12.943
Class III A	JU2829	M9	5.3621
Class III A	JU2829	M9	9.24499
Class III A	JU2829	M9	6.28659
Class III A	JU2829	fluoxetine	13.4052
Class III A	JU2829	fluoxetine	15.1002
Class III A	JU2829	fluoxetine	16.4561
Class III A	JU2829	fluoxetine	19.6456
Class III A	JU2829	fluoxetine	25.2696
Class III A	JU2829	fluoxetine	16.641
Class II	CB4856	M9	0
Class II	CB4856	M9	0.437477
Class II	CB4856	M9	0.262486
Class II	CB4856	M9	0.397707
Class II	CB4856	M9	0
Class II	CB4856	M9	0
Class II	CB4856	fluoxetine	11.3744
Class II	CB4856	fluoxetine	12.2494
Class II	CB4856	fluoxetine	15.1659
Class II	CB4856	fluoxetine	19.8323
Class II	CB4856	fluoxetine	14.2909
Class II	CB4856	fluoxetine	11.8119
Class II	JU1200	M9	0.333333
Class II	JU1200	M9	0.5
Class II	JU1200	M9	0.5
Class II	JU1200	M9	0
Class II	JU1200	M9	0
Class II	JU1200	M9	0
Class II	JU1200	fluoxetine	15
Class II	JU1200	fluoxetine	16.8
Class II	JU1200	fluoxetine	13
Class II	JU1200	fluoxetine	11.5
Class II	JU1200	fluoxetine	15.6
Class II	JU1200	fluoxetine	16.5
Class III B	JU751	M9	0
Class III B	JU751	M9	0
Class III B	JU751	M9	0
Class III B	JU751	M9	0
Class III B	JU751	M9	0.326664
Class III B	JU751	M9	0
Class III B	JU751	fluoxetine	10.7799
Class III B	JU751	fluoxetine	16.1699
Class III B	JU751	fluoxetine	7.83993
Class III B	JU751	fluoxetine	4.5733
Class III B	JU751	fluoxetine	10.4532
Class III B	JU751	fluoxetine	9.47325
Class III B	JU2587	M9	0
Class III B	JU2587	M9	0
Class III B	JU2587	M9	0.960769
Class III B	JU2587	M9	0
Class III B	JU2587	M9	0
Class III B	JU2587	M9	0.480384
Class III B	JU2587	fluoxetine	8.16653
Class III B	JU2587	fluoxetine	13.2106
Class III B	JU2587	fluoxetine	10.5685
Class III B	JU2587	fluoxetine	7.20576
Class III B	JU2587	fluoxetine	9.28743
Class III B	JU2587	fluoxetine	10.8887
Class III A	NIC1786	M9	0
Class III A	NIC1786	M9	0
Class III A	NIC1786	M9	0
Class III A	NIC1786	M9	0
Class III A	NIC1786	M9	0
Class III A	NIC1786	M9	0
Class III A	NIC1786	fluoxetine	12.2497
Class III A	NIC1786	fluoxetine	16.0188
Class III A	NIC1786	fluoxetine	12.9564
Class III A	NIC1786	fluoxetine	13.5061
Class III A	NIC1786	fluoxetine	11.3074
Class III A	NIC1786	fluoxetine	14.841
Class III A	ED3005	M9	0.308166
Class III A	ED3005	M9	0
Class III A	ED3005	M9	1.54083
Class III A	ED3005	M9	0.616333
Class III A	ED3005	M9	0
Class III A	ED3005	M9	0.308166
Class III A	ED3005	fluoxetine	2.7735
Class III A	ED3005	fluoxetine	9.24499
Class III A	ED3005	fluoxetine	6.77966
Class III A	ED3005	fluoxetine	8.32049
Class III A	ED3005	fluoxetine	4.31433
Class III A	ED3005	fluoxetine	8.55162
Class III A	JU440	M9	0
Class III A	JU440	M9	1.99622
Class III A	JU440	M9	0
Class III A	JU440	M9	0
Class III A	JU440	M9	0.604915
Class III A	JU440	M9	0
Class III A	JU440	fluoxetine	15.4253
Class III A	JU440	fluoxetine	12.7032
Class III A	JU440	fluoxetine	16.3327
Class III A	JU440	fluoxetine	13.6106
Class III A	JU440	fluoxetine	15.0624
Class III A	JU440	fluoxetine	15.879
Class II	QX1430	M9	0
Class II	QX1430	M9	0
Class II	QX1430	M9	0.890869
Class II	QX1430	M9	0
Class II	QX1430	M9	0
Class II	QX1430	M9	0
Class II	QX1430	fluoxetine	19.1537
Class II	QX1430	fluoxetine	19.1537
Class II	QX1430	fluoxetine	19.1537
Class II	QX1430	fluoxetine	18.4855
Class II	QX1430	fluoxetine	16.0356
Class II	QX1430	fluoxetine	20.49
Class II	N2	M9	0.5
Class II	N2	M9	1.75
Class II	N2	M9	0
Class II	N2	fluoxetine	15.25
Class II	N2	fluoxetine	17
Class II	N2	fluoxetine	20.3333
Class II	N2	M9	0
Class II	N2	M9	1.46999
Class II	N2	M9	0.979992
Class II	N2	fluoxetine	18.8648
Class II	N2	fluoxetine	19.2732
Class II	N2	fluoxetine	15.3532
Class II	QX1430	M9	2.88231
Class II	QX1430	M9	1.28102
Class II	QX1430	M9	0.960769
Class II	QX1430	fluoxetine	13.1305
Class II	QX1430	fluoxetine	17.7742
Class II	QX1430	fluoxetine	14.4115
Class II	QX1430	M9	1.57048
Class II	QX1430	M9	0.942285
Class II	QX1430	M9	1.88457
Class II	QX1430	fluoxetine	16.647
Class II	QX1430	fluoxetine	12.9564
Class II	QX1430	fluoxetine	15.7048
Class I	JU3166	M9	4.6225
Class I	JU3166	M9	4.16025
Class I	JU3166	M9	3.698
Class I	JU3166	fluoxetine	16.0247
Class I	JU3166	fluoxetine	15.4083
Class I	JU3166	fluoxetine	13.8675
Class I	JU3166	M9	4.83932
Class I	JU3166	M9	2.1172
Class I	JU3166	M9	2.1172
Class I	JU3166	fluoxetine	10.8885
Class I	JU3166	fluoxetine	15.7278
Class I	JU3166	fluoxetine	13.913
Class I	QG2873	M9	0
Class I	QG2873	M9	4.15739
Class I	QG2873	M9	1.78174
Class I	QG2873	fluoxetine	7.72086
Class I	QG2873	fluoxetine	11.8782
Class I	QG2873	fluoxetine	9.79955
Class I	QG2873	M9	0
Class I	QG2873	M9	1.34178
Class I	QG2873	M9	0
Class I	QG2873	fluoxetine	11.0324
Class I	QG2873	fluoxetine	9.54156
Class I	QG2873	fluoxetine	7.75252
Class II	N2	M9	1.25
Class II	N2	M9	2
Class II	N2	M9	1.5
Class II	N2	fluoxetine	15.6667
Class II	N2	fluoxetine	23.5
Class II	N2	fluoxetine	17.75
Class II	N2	M9	4.40996
Class II	N2	M9	1.63332
Class II	N2	M9	4.24663
Class II	N2	fluoxetine	19.2732
Class II	N2	fluoxetine	18.9465
Class II	N2	fluoxetine	18.6198
Class II	QX1430	M9	3.65092
Class II	QX1430	M9	3.84307
Class II	QX1430	M9	3.36269
Class II	QX1430	fluoxetine	15.3723
Class II	QX1430	fluoxetine	13.4508
Class II	QX1430	fluoxetine	16.6533
Class II	QX1430	M9	3.06243
Class II	QX1430	M9	4.39733
Class II	QX1430	M9	3.14095
Class II	QX1430	fluoxetine	16.9611
Class II	QX1430	fluoxetine	15.5477
Class II	QX1430	fluoxetine	13.8202
Class I	JU3166	M9	6.70262
Class I	JU3166	M9	7.39599
Class I	JU3166	M9	4.31433
Class I	JU3166	fluoxetine	12.0185
Class I	JU3166	fluoxetine	16.4561
Class I	JU3166	fluoxetine	10.7858
Class I	JU3166	M9	3.32703
Class I	JU3166	M9	0.907372
Class I	JU3166	M9	3.93195
Class I	JU3166	fluoxetine	15.4253
Class I	JU3166	fluoxetine	15.4253
Class I	JU3166	fluoxetine	16.9376
Class I	QG2873	M9	1.55902
Class I	QG2873	M9	2.67261
Class I	QG2873	M9	2.07869
Class I	QG2873	fluoxetine	11.1359
Class I	QG2873	fluoxetine	11.8782
Class I	QG2873	fluoxetine	9.79955
Class I	QG2873	M9	5.36713
Class I	QG2873	M9	2.93914
Class I	QG2873	M9	3.22028
Class I	QG2873	fluoxetine	10.1379
Class I	QG2873	fluoxetine	6.79836
Class I	QG2873	fluoxetine	8.05069

## Sheet: Figure7C and Supplement 1
Genetic Background	KCNL-1 genotype	Treatment	Eggs laid per animal
JU1200	V530L	M9	1.2
JU1200	V530L	M9	0.5
JU1200	V530L	M9	1.6
JU1200	V530L	serotonin	1
JU1200	V530L	serotonin	0.2
JU1200	V530L	serotonin	0.8
JU1200	V530L	fluoxetine	11.4
JU1200	V530L	fluoxetine	9.6
JU1200	V530L	fluoxetine	11
JU1200	V530L	imipramine	5
JU1200	V530L	imipramine	6.71429
JU1200	V530L	imipramine	4.75
JU1200	V530L	M9	2.5941
JU1200	V530L	M9	2.93998
JU1200	V530L	M9	2.69498
JU1200	V530L	serotonin	1.37199
JU1200	V530L	serotonin	0.734994
JU1200	V530L	serotonin	0.326664
JU1200	V530L	fluoxetine	12.8624
JU1200	V530L	fluoxetine	12.0866
JU1200	V530L	fluoxetine	11.5639
JU1200	V530L	imipramine	6.85994
JU1200	V530L	imipramine	6.07595
JU1200	V530L	imipramine	5.38996
JU751	WT	M9	4.61169
JU751	WT	M9	2.56205
JU751	WT	M9	6.08487
JU751	WT	serotonin	3.72298
JU751	WT	serotonin	1.1209
JU751	WT	serotonin	4.61169
JU751	WT	fluoxetine	25.1721
JU751	WT	fluoxetine	32.2818
JU751	WT	fluoxetine	19.4075
JU751	WT	imipramine	9.1273
JU751	WT	imipramine	13.9311
JU751	WT	imipramine	10.0881
JU751	WT	M9	5.33962
JU751	WT	M9	3.45505
JU751	WT	M9	5.96781
JU751	WT	serotonin	2.82686
JU751	WT	serotonin	1.13074
JU751	WT	serotonin	1.25638
JU751	WT	fluoxetine	20.4947
JU751	WT	fluoxetine	9.42285
JU751	WT	fluoxetine	6.12485
JU751	WT	imipramine	1.88457
JU751	WT	imipramine	3.298
JU751	WT	imipramine	4.08324
JU1200	WT	M9	6.47149
JU1200	WT	M9	5.39291
JU1200	WT	M9	4.8074
JU1200	WT	serotonin	11.5562
JU1200	WT	serotonin	19.2296
JU1200	WT	serotonin	16.641
JU1200	WT	fluoxetine	19.4145
JU1200	WT	fluoxetine	19.7843
JU1200	WT	fluoxetine	21.0324
JU1200	WT	imipramine	13.4052
JU1200	WT	imipramine	11.2481
JU1200	WT	imipramine	8.78274
JU1200	WT	M9	6.80529
JU1200	WT	M9	6.35161
JU1200	WT	M9	8.39319
JU1200	WT	serotonin	17.3913
JU1200	WT	serotonin	16.9376
JU1200	WT	serotonin	10.37
JU1200	WT	fluoxetine	23.7732
JU1200	WT	fluoxetine	21.051
JU1200	WT	fluoxetine	24.6805
JU1200	WT	imipramine	10.344
JU1200	WT	imipramine	15.0624
JU1200	WT	imipramine	11.4934
JU751	L530V	M9	3.34076
JU751	L530V	M9	3.02895
JU751	L530V	M9	4.00891
JU751	L530V	serotonin	21.3808
JU751	L530V	serotonin	13.5857
JU751	L530V	serotonin	8.1663
JU751	L530V	fluoxetine	14.9666
JU751	L530V	fluoxetine	15.3229
JU751	L530V	fluoxetine	16.7038
JU751	L530V	imipramine	8.90869
JU751	L530V	imipramine	10.0965
JU751	L530V	imipramine	11.1359
JU751	L530V	M9	3.06234
JU751	L530V	M9	4.66642
JU751	L530V	M9	4.59351
JU751	L530V	serotonin	7.17463
JU751	L530V	serotonin	9.14725
JU751	L530V	serotonin	11.0244
JU751	L530V	fluoxetine	18.724
JU751	L530V	fluoxetine	18.899
JU751	L530V	fluoxetine	16.8429
JU751	L530V	imipramine	12.4244
JU751	L530V	imipramine	9.6245
JU751	L530V	imipramine	7.34962
