# Supplementary material for: Natural variation in the Caenorhabditis elegans egg-laying circuit modulates an intergenerational fitness trade-off
Source: eLife. 2024 Apr 2;12:RP88253. doi: 10.7554/eLife.88253 (PMC10987095; doi:10.7554/eLife.88253)
Supplement: Figure 7—source data 2. [file elife-88253-fig7-data2.xlsx]

## Sheet: Figure 7B - serotonin
Results for statistical analyses testing for the effects of and interactions between Strain and Treatment (control versus serotonin) on egg laying (Align Rank Transform ANOVA).
Source	Df	Sum of squares	F value	Pr(>F)	Sig
Treatment	1	3.13697e+06	432.62	3.45e-65	***
Strain	14	3.71988e+06	42.94	4.44e-70	***
Treatment x Strain	14	3.37349e+06	34.4	1.95e-59	***
Contrasts
contrast	estimate	SE	Df	t-ratio	p-value
M9,CB4856 - M9,ED3005	-25.63	24.69	390	-1.04	1
M9,CB4856 - M9,JU1200	-61.08	22.8	390	-2.68	0.646
M9,CB4856 - M9,JU2587	-117.54	24.69	390	-4.76	0.00105
M9,CB4856 - M9,JU2593	37.38	24.69	390	1.51	1
M9,CB4856 - M9,JU2829	-171.88	24.69	390	-6.96	6.23e-09
M9,CB4856 - M9,JU3166	-172.33	24.69	390	-6.98	5.54e-09
M9,CB4856 - M9,JU440	-90.67	24.69	390	-3.67	0.0702
M9,CB4856 - M9,JU751	-106.29	24.69	390	-4.3	0.00727
M9,CB4856 - M9,JU830	-97.58	24.69	390	-3.95	0.0275
M9,CB4856 - M9,N2	-115.1	21.38	390	-5.38	5.25e-05
M9,CB4856 - M9,NIC1786	34.61	25.25	390	1.37	1
M9,CB4856 - M9,NIC1832	-38.08	24.69	390	-1.54	1
M9,CB4856 - M9,QG2873	-96	24.69	390	-3.89	0.0344
M9,CB4856 - M9,QX1430	-134.58	21.38	390	-6.29	3.59e-07
M9,CB4856 - serotonin,CB4856	-228.08	24.69	390	-9.24	<0,0001
M9,CB4856 - serotonin,ED3005	-323.21	24.69	390	-13.09	<0,0001
M9,CB4856 - serotonin,JU1200	-242.08	22.54	390	-10.74	<0,0001
M9,CB4856 - serotonin,JU2587	-29.87	24.69	390	-1.21	1
M9,CB4856 - serotonin,JU2593	-18.4	23.42	390	-0.79	1
M9,CB4856 - serotonin,JU2829	11.83	24.69	390	0.48	1
M9,CB4856 - serotonin,JU3166	-311.71	24.69	390	-12.62	<0,0001
M9,CB4856 - serotonin,JU440	-287.92	24.69	390	-11.66	<0,0001
M9,CB4856 - serotonin,JU751	-27.79	24.69	390	-1.13	1
M9,CB4856 - serotonin,JU830	-287.25	24.69	390	-11.63	<0,0001
M9,CB4856 - serotonin,N2	-269.44	21.38	390	-12.6	<0,0001
M9,CB4856 - serotonin,NIC1786	-152.08	24.69	390	-6.16	7.8e-07
M9,CB4856 - serotonin,NIC1832	-5.71	25.25	390	-0.23	1
M9,CB4856 - serotonin,QG2873	-245.67	24.69	390	-9.95	<0,0001
M9,CB4856 - serotonin,QX1430	-225.52	21.38	390	-10.55	<0,0001
M9,ED3005 - M9,JU1200	-35.45	22.8	390	-1.55	1
M9,ED3005 - M9,JU2587	-91.92	24.69	390	-3.72	0.0597
M9,ED3005 - M9,JU2593	63	24.69	390	2.55	0.742
M9,ED3005 - M9,JU2829	-146.25	24.69	390	-5.92	2.96e-06
M9,ED3005 - M9,JU3166	-146.71	24.69	390	-5.94	2.67e-06
M9,ED3005 - M9,JU440	-65.04	24.69	390	-2.63	0.68
M9,ED3005 - M9,JU751	-80.67	24.69	390	-3.27	0.218
M9,ED3005 - M9,JU830	-71.96	24.69	390	-2.91	0.455
M9,ED3005 - M9,N2	-89.48	21.38	390	-4.18	0.0116
M9,ED3005 - M9,NIC1786	60.23	25.25	390	2.39	0.849
M9,ED3005 - M9,NIC1832	-12.46	24.69	390	-0.5	1
M9,ED3005 - M9,QG2873	-70.38	24.69	390	-2.85	0.506
M9,ED3005 - M9,QX1430	-108.96	21.38	390	-5.1	0.000219
M9,ED3005 - serotonin,CB4856	-202.46	24.69	390	-8.2	<0,0001
M9,ED3005 - serotonin,ED3005	-297.58	24.69	390	-12.05	<0,0001
M9,ED3005 - serotonin,JU1200	-216.46	22.54	390	-9.6	<0,0001
M9,ED3005 - serotonin,JU2587	-4.25	24.69	390	-0.17	1
M9,ED3005 - serotonin,JU2593	7.23	23.42	390	0.31	1
M9,ED3005 - serotonin,JU2829	37.46	24.69	390	1.52	1
M9,ED3005 - serotonin,JU3166	-286.08	24.69	390	-11.59	<0,0001
M9,ED3005 - serotonin,JU440	-262.29	24.69	390	-10.62	<0,0001
M9,ED3005 - serotonin,JU751	-2.17	24.69	390	-0.09	1
M9,ED3005 - serotonin,JU830	-261.62	24.69	390	-10.6	<0,0001
M9,ED3005 - serotonin,N2	-243.81	21.38	390	-11.4	<0,0001
M9,ED3005 - serotonin,NIC1786	-126.46	24.69	390	-5.12	0.000193
M9,ED3005 - serotonin,NIC1832	19.91	25.25	390	0.79	1
M9,ED3005 - serotonin,QG2873	-220.04	24.69	390	-8.91	<0,0001
M9,ED3005 - serotonin,QX1430	-199.9	21.38	390	-9.35	<0,0001
M9,JU1200 - M9,JU2587	-56.46	22.8	390	-2.48	0.794
M9,JU1200 - M9,JU2593	98.45	22.8	390	4.32	0.00691
M9,JU1200 - M9,JU2829	-110.8	22.8	390	-4.86	0.000668
M9,JU1200 - M9,JU3166	-111.25	22.8	390	-4.88	0.000609
M9,JU1200 - M9,JU440	-29.59	22.8	390	-1.3	1
M9,JU1200 - M9,JU751	-45.21	22.8	390	-1.98	0.98
M9,JU1200 - M9,JU830	-36.5	22.8	390	-1.6	0.999
M9,JU1200 - M9,N2	-54.03	19.17	390	-2.82	0.533
M9,JU1200 - M9,NIC1786	95.68	23.4	390	4.09	0.0168
M9,JU1200 - M9,NIC1832	23	22.8	390	1.01	1
M9,JU1200 - M9,QG2873	-34.92	22.8	390	-1.53	1
M9,JU1200 - M9,QX1430	-73.5	19.17	390	-3.83	0.0414
M9,JU1200 - serotonin,CB4856	-167	22.8	390	-7.32	5.91e-10
M9,JU1200 - serotonin,ED3005	-262.13	22.8	390	-11.49	<0,0001
M9,JU1200 - serotonin,JU1200	-181	20.46	390	-8.85	<0,0001
M9,JU1200 - serotonin,JU2587	31.2	22.8	390	1.37	1
M9,JU1200 - serotonin,JU2593	42.68	21.43	390	1.99	0.979
M9,JU1200 - serotonin,JU2829	72.91	22.8	390	3.2	0.257
M9,JU1200 - serotonin,JU3166	-250.63	22.8	390	-10.99	<0,0001
M9,JU1200 - serotonin,JU440	-226.84	22.8	390	-9.95	<0,0001
M9,JU1200 - serotonin,JU751	33.29	22.8	390	1.46	1
M9,JU1200 - serotonin,JU830	-226.17	22.8	390	-9.92	<0,0001
M9,JU1200 - serotonin,N2	-208.36	19.17	390	-10.87	<0,0001
M9,JU1200 - serotonin,NIC1786	-91	22.8	390	-3.99	0.024
M9,JU1200 - serotonin,NIC1832	55.37	23.4	390	2.37	0.859
M9,JU1200 - serotonin,QG2873	-184.59	22.8	390	-8.09	<0,0001
M9,JU1200 - serotonin,QX1430	-164.44	19.17	390	-8.58	<0,0001
M9,JU2587 - M9,JU2593	154.92	24.69	390	6.27	4.02e-07
M9,JU2587 - M9,JU2829	-54.33	24.69	390	-2.2	0.931
M9,JU2587 - M9,JU3166	-54.79	24.69	390	-2.22	0.924
M9,JU2587 - M9,JU440	26.88	24.69	390	1.09	1
M9,JU2587 - M9,JU751	11.25	24.69	390	0.46	1
M9,JU2587 - M9,JU830	19.96	24.69	390	0.81	1
M9,JU2587 - M9,N2	2.44	21.38	390	0.11	1
M9,JU2587 - M9,NIC1786	152.15	25.25	390	6.03	1.66e-06
M9,JU2587 - M9,NIC1832	79.46	24.69	390	3.22	0.245
M9,JU2587 - M9,QG2873	21.54	24.69	390	0.87	1
M9,JU2587 - M9,QX1430	-17.04	21.38	390	-0.8	1
M9,JU2587 - serotonin,CB4856	-110.54	24.69	390	-4.48	0.00359
M9,JU2587 - serotonin,ED3005	-205.67	24.69	390	-8.33	<0,0001
M9,JU2587 - serotonin,JU1200	-124.54	22.54	390	-5.53	2.52e-05
M9,JU2587 - serotonin,JU2587	87.67	24.69	390	3.55	0.101
M9,JU2587 - serotonin,JU2593	99.14	23.42	390	4.23	0.00967
M9,JU2587 - serotonin,JU2829	129.38	24.69	390	5.24	0.000108
M9,JU2587 - serotonin,JU3166	-194.17	24.69	390	-7.86	4.24e-13
M9,JU2587 - serotonin,JU440	-170.37	24.69	390	-6.9	9.13e-09
M9,JU2587 - serotonin,JU751	89.75	24.69	390	3.63	0.0787
M9,JU2587 - serotonin,JU830	-169.71	24.69	390	-6.87	1.08e-08
M9,JU2587 - serotonin,N2	-151.9	21.38	390	-7.1	2.51e-09
M9,JU2587 - serotonin,NIC1786	-34.54	24.69	390	-1.4	1
M9,JU2587 - serotonin,NIC1832	111.83	25.25	390	4.43	0.00437
M9,JU2587 - serotonin,QG2873	-128.12	24.69	390	-5.19	0.000139
M9,JU2587 - serotonin,QX1430	-107.98	21.38	390	-5.05	0.000272
M9,JU2593 - M9,JU2829	-209.25	24.69	390	-8.47	<0,0001
M9,JU2593 - M9,JU3166	-209.71	24.69	390	-8.49	<0,0001
M9,JU2593 - M9,JU440	-128.04	24.69	390	-5.19	0.000141
M9,JU2593 - M9,JU751	-143.67	24.69	390	-5.82	5.26e-06
M9,JU2593 - M9,JU830	-134.96	24.69	390	-5.47	3.43e-05
M9,JU2593 - M9,N2	-152.48	21.38	390	-7.13	2.1e-09
M9,JU2593 - M9,NIC1786	-2.77	25.25	390	-0.11	1
M9,JU2593 - M9,NIC1832	-75.46	24.69	390	-3.06	0.349
M9,JU2593 - M9,QG2873	-133.38	24.69	390	-5.4	4.77e-05
M9,JU2593 - M9,QX1430	-171.96	21.38	390	-8.04	<0,0001
M9,JU2593 - serotonin,CB4856	-265.46	24.69	390	-10.75	<0,0001
M9,JU2593 - serotonin,ED3005	-360.58	24.69	390	-14.6	<0,0001
M9,JU2593 - serotonin,JU1200	-279.46	22.54	390	-12.4	<0,0001
M9,JU2593 - serotonin,JU2587	-67.25	24.69	390	-2.72	0.609
M9,JU2593 - serotonin,JU2593	-55.78	23.42	390	-2.38	0.851
M9,JU2593 - serotonin,JU2829	-25.54	24.69	390	-1.03	1
M9,JU2593 - serotonin,JU3166	-349.08	24.69	390	-14.14	<0,0001
M9,JU2593 - serotonin,JU440	-325.29	24.69	390	-13.17	<0,0001
M9,JU2593 - serotonin,JU751	-65.17	24.69	390	-2.64	0.677
M9,JU2593 - serotonin,JU830	-324.63	24.69	390	-13.15	<0,0001
M9,JU2593 - serotonin,N2	-306.81	21.38	390	-14.35	<0,0001
M9,JU2593 - serotonin,NIC1786	-189.46	24.69	390	-7.67	4.34e-11
M9,JU2593 - serotonin,NIC1832	-43.09	25.25	390	-1.71	0.998
M9,JU2593 - serotonin,QG2873	-283.04	24.69	390	-11.46	<0,0001
M9,JU2593 - serotonin,QX1430	-262.9	21.38	390	-12.29	<0,0001
M9,JU2829 - M9,JU3166	-0.46	24.69	390	-0.02	1
M9,JU2829 - M9,JU440	81.21	24.69	390	3.29	0.206
M9,JU2829 - M9,JU751	65.58	24.69	390	2.66	0.663
M9,JU2829 - M9,JU830	74.29	24.69	390	3.01	0.383
M9,JU2829 - M9,N2	56.77	21.38	390	2.65	0.664
M9,JU2829 - M9,NIC1786	206.48	25.25	390	8.18	<0,0001
M9,JU2829 - M9,NIC1832	133.79	24.69	390	5.42	4.37e-05
M9,JU2829 - M9,QG2873	75.88	24.69	390	3.07	0.337
M9,JU2829 - M9,QX1430	37.29	21.38	390	1.74	0.997
M9,JU2829 - serotonin,CB4856	-56.21	24.69	390	-2.28	0.902
M9,JU2829 - serotonin,ED3005	-151.33	24.69	390	-6.13	9.29e-07
M9,JU2829 - serotonin,JU1200	-70.21	22.54	390	-3.11	0.308
M9,JU2829 - serotonin,JU2587	142	24.69	390	5.75	7.59e-06
M9,JU2829 - serotonin,JU2593	153.48	23.42	390	6.55	7.77e-08
M9,JU2829 - serotonin,JU2829	183.71	24.69	390	7.44	2.66e-10
M9,JU2829 - serotonin,JU3166	-139.83	24.69	390	-5.66	1.22e-05
M9,JU2829 - serotonin,JU440	-116.04	24.69	390	-4.7	0.00137
M9,JU2829 - serotonin,JU751	144.08	24.69	390	5.84	4.8e-06
M9,JU2829 - serotonin,JU830	-115.37	24.69	390	-4.67	0.00155
M9,JU2829 - serotonin,N2	-97.56	21.38	390	-4.56	0.0025
M9,JU2829 - serotonin,NIC1786	19.79	24.69	390	0.8	1
M9,JU2829 - serotonin,NIC1832	166.16	25.25	390	6.58	6.49e-08
M9,JU2829 - serotonin,QG2873	-73.79	24.69	390	-2.99	0.398
M9,JU2829 - serotonin,QX1430	-53.65	21.38	390	-2.51	0.772
M9,JU3166 - M9,JU440	81.67	24.69	390	3.31	0.197
M9,JU3166 - M9,JU751	66.04	24.69	390	2.67	0.649
M9,JU3166 - M9,JU830	74.75	24.69	390	3.03	0.369
M9,JU3166 - M9,N2	57.23	21.38	390	2.68	0.647
M9,JU3166 - M9,NIC1786	206.94	25.25	390	8.2	<0,0001
M9,JU3166 - M9,NIC1832	134.25	24.69	390	5.44	3.98e-05
M9,JU3166 - M9,QG2873	76.33	24.69	390	3.09	0.324
M9,JU3166 - M9,QX1430	37.75	21.38	390	1.77	0.996
M9,JU3166 - serotonin,CB4856	-55.75	24.69	390	-2.26	0.91
M9,JU3166 - serotonin,ED3005	-150.88	24.69	390	-6.11	1.03e-06
M9,JU3166 - serotonin,JU1200	-69.75	22.54	390	-3.09	0.322
M9,JU3166 - serotonin,JU2587	142.46	24.69	390	5.77	6.86e-06
M9,JU3166 - serotonin,JU2593	153.93	23.42	390	6.57	6.91e-08
M9,JU3166 - serotonin,JU2829	184.17	24.69	390	7.46	2.33e-10
M9,JU3166 - serotonin,JU3166	-139.37	24.69	390	-5.64	1.34e-05
M9,JU3166 - serotonin,JU440	-115.58	24.69	390	-4.68	0.00149
M9,JU3166 - serotonin,JU751	144.54	24.69	390	5.85	4.33e-06
M9,JU3166 - serotonin,JU830	-114.92	24.69	390	-4.65	0.00168
M9,JU3166 - serotonin,N2	-97.1	21.38	390	-4.54	0.00274
M9,JU3166 - serotonin,NIC1786	20.25	24.69	390	0.82	1
M9,JU3166 - serotonin,NIC1832	166.62	25.25	390	6.6	5.82e-08
M9,JU3166 - serotonin,QG2873	-73.33	24.69	390	-2.97	0.412
M9,JU3166 - serotonin,QX1430	-53.19	21.38	390	-2.49	0.787
M9,JU440 - M9,JU751	-15.63	24.69	390	-0.63	1
M9,JU440 - M9,JU830	-6.92	24.69	390	-0.28	1
M9,JU440 - M9,N2	-24.44	21.38	390	-1.14	1
M9,JU440 - M9,NIC1786	125.27	25.25	390	4.96	0.000413
M9,JU440 - M9,NIC1832	52.58	24.69	390	2.13	0.952
M9,JU440 - M9,QG2873	-5.33	24.69	390	-0.22	1
M9,JU440 - M9,QX1430	-43.92	21.38	390	-2.05	0.968
M9,JU440 - serotonin,CB4856	-137.42	24.69	390	-5.57	2.04e-05
M9,JU440 - serotonin,ED3005	-232.54	24.69	390	-9.42	<0,0001
M9,JU440 - serotonin,JU1200	-151.42	22.54	390	-6.72	2.84e-08
M9,JU440 - serotonin,JU2587	60.79	24.69	390	2.46	0.803
M9,JU440 - serotonin,JU2593	72.27	23.42	390	3.09	0.328
M9,JU440 - serotonin,JU2829	102.5	24.69	390	4.15	0.0132
M9,JU440 - serotonin,JU3166	-221.04	24.69	390	-8.95	<0,0001
M9,JU440 - serotonin,JU440	-197.25	24.69	390	-7.99	<0,0001
M9,JU440 - serotonin,JU751	62.88	24.69	390	2.55	0.746
M9,JU440 - serotonin,JU830	-196.58	24.69	390	-7.96	<0,0001
M9,JU440 - serotonin,N2	-178.77	21.38	390	-8.36	<0,0001
M9,JU440 - serotonin,NIC1786	-61.42	24.69	390	-2.49	0.787
M9,JU440 - serotonin,NIC1832	84.95	25.25	390	3.36	0.17
M9,JU440 - serotonin,QG2873	-155	24.69	390	-6.28	3.95e-07
M9,JU440 - serotonin,QX1430	-134.85	21.38	390	-6.31	3.33e-07
M9,JU751 - M9,JU830	8.71	24.69	390	0.35	1
M9,JU751 - M9,N2	-8.81	21.38	390	-0.41	1
M9,JU751 - M9,NIC1786	140.9	25.25	390	5.58	1.88e-05
M9,JU751 - M9,NIC1832	68.21	24.69	390	2.76	0.578
M9,JU751 - M9,QG2873	10.29	24.69	390	0.42	1
M9,JU751 - M9,QX1430	-28.29	21.38	390	-1.32	1
M9,JU751 - serotonin,CB4856	-121.79	24.69	390	-4.93	0.000474
M9,JU751 - serotonin,ED3005	-216.92	24.69	390	-8.79	<0,0001
M9,JU751 - serotonin,JU1200	-135.79	22.54	390	-6.02	1.68e-06
M9,JU751 - serotonin,JU2587	76.42	24.69	390	3.09	0.322
M9,JU751 - serotonin,JU2593	87.89	23.42	390	3.75	0.0543
M9,JU751 - serotonin,JU2829	118.13	24.69	390	4.78	0.000939
M9,JU751 - serotonin,JU3166	-205.42	24.69	390	-8.32	<0,0001
M9,JU751 - serotonin,JU440	-181.62	24.69	390	-7.36	4.75e-10
M9,JU751 - serotonin,JU751	78.5	24.69	390	3.18	0.268
M9,JU751 - serotonin,JU830	-180.96	24.69	390	-7.33	5.7e-10
M9,JU751 - serotonin,N2	-163.15	21.38	390	-7.63	6.36e-11
M9,JU751 - serotonin,NIC1786	-45.79	24.69	390	-1.85	0.992
M9,JU751 - serotonin,NIC1832	100.58	25.25	390	3.98	0.0246
M9,JU751 - serotonin,QG2873	-139.37	24.69	390	-5.64	1.34e-05
M9,JU751 - serotonin,QX1430	-119.23	21.38	390	-5.58	1.93e-05
M9,JU830 - M9,N2	-17.52	21.38	390	-0.82	1
M9,JU830 - M9,NIC1786	132.19	25.25	390	5.24	0.00011
M9,JU830 - M9,NIC1832	59.5	24.69	390	2.41	0.835
M9,JU830 - M9,QG2873	1.58	24.69	390	0.06	1
M9,JU830 - M9,QX1430	-37	21.38	390	-1.73	0.997
M9,JU830 - serotonin,CB4856	-130.5	24.69	390	-5.29	8.59e-05
M9,JU830 - serotonin,ED3005	-225.63	24.69	390	-9.14	<0,0001
M9,JU830 - serotonin,JU1200	-144.5	22.54	390	-6.41	1.8e-07
M9,JU830 - serotonin,JU2587	67.71	24.69	390	2.74	0.594
M9,JU830 - serotonin,JU2593	79.18	23.42	390	3.38	0.163
M9,JU830 - serotonin,JU2829	109.42	24.69	390	4.43	0.00434
M9,JU830 - serotonin,JU3166	-214.13	24.69	390	-8.67	<0,0001
M9,JU830 - serotonin,JU440	-190.33	24.69	390	-7.71	3.08e-11
M9,JU830 - serotonin,JU751	69.79	24.69	390	2.83	0.526
M9,JU830 - serotonin,JU830	-189.67	24.69	390	-7.68	4.01e-11
M9,JU830 - serotonin,N2	-171.85	21.38	390	-8.04	<0,0001
M9,JU830 - serotonin,NIC1786	-54.5	24.69	390	-2.21	0.928
M9,JU830 - serotonin,NIC1832	91.87	25.25	390	3.64	0.0777
M9,JU830 - serotonin,QG2873	-148.08	24.69	390	-6	1.95e-06
M9,JU830 - serotonin,QX1430	-127.94	21.38	390	-5.98	2.12e-06
M9,N2 - M9,NIC1786	149.71	22.02	390	6.8	1.72e-08
M9,N2 - M9,NIC1832	77.02	21.38	390	3.6	0.087
M9,N2 - M9,QG2873	19.1	21.38	390	0.89	1
M9,N2 - M9,QX1430	-19.48	17.46	390	-1.12	1
M9,N2 - serotonin,CB4856	-112.98	21.38	390	-5.28	8.67e-05
M9,N2 - serotonin,ED3005	-208.1	21.38	390	-9.73	<0,0001
M9,N2 - serotonin,JU1200	-126.98	18.86	390	-6.73	2.58e-08
M9,N2 - serotonin,JU2587	85.23	21.38	390	3.99	0.0244
M9,N2 - serotonin,JU2593	96.7	19.91	390	4.86	0.000671
M9,N2 - serotonin,JU2829	126.94	21.38	390	5.94	2.75e-06
M9,N2 - serotonin,JU3166	-196.6	21.38	390	-9.19	<0,0001
M9,N2 - serotonin,JU440	-172.81	21.38	390	-8.08	<0,0001
M9,N2 - serotonin,JU751	87.31	21.38	390	4.08	0.0171
M9,N2 - serotonin,JU830	-172.15	21.38	390	-8.05	<0,0001
M9,N2 - serotonin,N2	-154.33	17.46	390	-8.84	<0,0001
M9,N2 - serotonin,NIC1786	-36.98	21.38	390	-1.73	0.997
M9,N2 - serotonin,NIC1832	109.39	22.02	390	4.97	0.000403
M9,N2 - serotonin,QG2873	-130.56	21.38	390	-6.11	1.06e-06
M9,N2 - serotonin,QX1430	-110.42	17.46	390	-6.32	3e-07
M9,NIC1786 - M9,NIC1832	-72.69	25.25	390	-2.88	0.483
M9,NIC1786 - M9,QG2873	-130.61	25.25	390	-5.17	0.00015
M9,NIC1786 - M9,QX1430	-169.19	22.02	390	-7.68	3.96e-11
M9,NIC1786 - serotonin,CB4856	-262.69	25.25	390	-10.4	<0,0001
M9,NIC1786 - serotonin,ED3005	-357.81	25.25	390	-14.17	<0,0001
M9,NIC1786 - serotonin,JU1200	-276.69	23.15	390	-11.95	<0,0001
M9,NIC1786 - serotonin,JU2587	-64.48	25.25	390	-2.55	0.741
M9,NIC1786 - serotonin,JU2593	-53.01	24.01	390	-2.21	0.928
M9,NIC1786 - serotonin,JU2829	-22.77	25.25	390	-0.9	1
M9,NIC1786 - serotonin,JU3166	-346.31	25.25	390	-13.72	<0,0001
M9,NIC1786 - serotonin,JU440	-322.52	25.25	390	-12.77	<0,0001
M9,NIC1786 - serotonin,JU751	-62.4	25.25	390	-2.47	0.797
M9,NIC1786 - serotonin,JU830	-321.86	25.25	390	-12.75	<0,0001
M9,NIC1786 - serotonin,N2	-304.04	22.02	390	-13.81	<0,0001
M9,NIC1786 - serotonin,NIC1786	-186.69	25.25	390	-7.39	3.64e-10
M9,NIC1786 - serotonin,NIC1832	-40.32	25.79	390	-1.56	0.999
M9,NIC1786 - serotonin,QG2873	-280.27	25.25	390	-11.1	<0,0001
M9,NIC1786 - serotonin,QX1430	-260.13	22.02	390	-11.81	<0,0001
M9,NIC1832 - M9,QG2873	-57.92	24.69	390	-2.35	0.87
M9,NIC1832 - M9,QX1430	-96.5	21.38	390	-4.51	0.00308
M9,NIC1832 - serotonin,CB4856	-190	24.69	390	-7.69	3.52e-11
M9,NIC1832 - serotonin,ED3005	-285.13	24.69	390	-11.55	<0,0001
M9,NIC1832 - serotonin,JU1200	-204	22.54	390	-9.05	<0,0001
M9,NIC1832 - serotonin,JU2587	8.21	24.69	390	0.33	1
M9,NIC1832 - serotonin,JU2593	19.68	23.42	390	0.84	1
M9,NIC1832 - serotonin,JU2829	49.92	24.69	390	2.02	0.974
M9,NIC1832 - serotonin,JU3166	-273.63	24.69	390	-11.08	<0,0001
M9,NIC1832 - serotonin,JU440	-249.83	24.69	390	-10.12	<0,0001
M9,NIC1832 - serotonin,JU751	10.29	24.69	390	0.42	1
M9,NIC1832 - serotonin,JU830	-249.17	24.69	390	-10.09	<0,0001
M9,NIC1832 - serotonin,N2	-231.35	21.38	390	-10.82	<0,0001
M9,NIC1832 - serotonin,NIC1786	-114	24.69	390	-4.62	0.00197
M9,NIC1832 - serotonin,NIC1832	32.37	25.25	390	1.28	1
M9,NIC1832 - serotonin,QG2873	-207.58	24.69	390	-8.41	<0,0001
M9,NIC1832 - serotonin,QX1430	-187.44	21.38	390	-8.77	<0,0001
M9,QG2873 - M9,QX1430	-38.58	21.38	390	-1.8	0.995
M9,QG2873 - serotonin,CB4856	-132.08	24.69	390	-5.35	6.22e-05
M9,QG2873 - serotonin,ED3005	-227.21	24.69	390	-9.2	<0,0001
M9,QG2873 - serotonin,JU1200	-146.08	22.54	390	-6.48	1.19e-07
M9,QG2873 - serotonin,JU2587	66.13	24.69	390	2.68	0.646
M9,QG2873 - serotonin,JU2593	77.6	23.42	390	3.31	0.194
M9,QG2873 - serotonin,JU2829	107.83	24.69	390	4.37	0.00565
M9,QG2873 - serotonin,JU3166	-215.71	24.69	390	-8.74	<0,0001
M9,QG2873 - serotonin,JU440	-191.92	24.69	390	-7.77	1.43e-11
M9,QG2873 - serotonin,JU751	68.21	24.69	390	2.76	0.578
M9,QG2873 - serotonin,JU830	-191.25	24.69	390	-7.75	2.04e-11
M9,QG2873 - serotonin,N2	-173.44	21.38	390	-8.11	<0,0001
M9,QG2873 - serotonin,NIC1786	-56.08	24.69	390	-2.27	0.904
M9,QG2873 - serotonin,NIC1832	90.29	25.25	390	3.58	0.094
M9,QG2873 - serotonin,QG2873	-149.67	24.69	390	-6.06	1.36e-06
M9,QG2873 - serotonin,QX1430	-129.52	21.38	390	-6.06	1.4e-06
M9,QX1430 - serotonin,CB4856	-93.5	21.38	390	-4.37	0.00553
M9,QX1430 - serotonin,ED3005	-188.63	21.38	390	-8.82	<0,0001
M9,QX1430 - serotonin,JU1200	-107.5	18.86	390	-5.7	9.97e-06
M9,QX1430 - serotonin,JU2587	104.71	21.38	390	4.9	0.00056
M9,QX1430 - serotonin,JU2593	116.18	19.91	390	5.84	4.77e-06
M9,QX1430 - serotonin,JU2829	146.42	21.38	390	6.85	1.27e-08
M9,QX1430 - serotonin,JU3166	-177.13	21.38	390	-8.28	<0,0001
M9,QX1430 - serotonin,JU440	-153.33	21.38	390	-7.17	1.62e-09
M9,QX1430 - serotonin,JU751	106.79	21.38	390	4.99	0.000355
M9,QX1430 - serotonin,JU830	-152.67	21.38	390	-7.14	1.99e-09
M9,QX1430 - serotonin,N2	-134.85	17.46	390	-7.72	2.62e-11
M9,QX1430 - serotonin,NIC1786	-17.5	21.38	390	-0.82	1
M9,QX1430 - serotonin,NIC1832	128.87	22.02	390	5.85	4.38e-06
M9,QX1430 - serotonin,QG2873	-111.08	21.38	390	-5.19	0.000135
M9,QX1430 - serotonin,QX1430	-90.94	17.46	390	-5.21	0.000126
serotonin,CB4856 - serotonin,ED3005	-95.13	24.69	390	-3.85	0.0389
serotonin,CB4856 - serotonin,JU1200	-14	22.54	390	-0.62	1
serotonin,CB4856 - serotonin,JU2587	198.21	24.69	390	8.03	<0,0001
serotonin,CB4856 - serotonin,JU2593	209.68	23.42	390	8.95	<0,0001
serotonin,CB4856 - serotonin,JU2829	239.92	24.69	390	9.72	<0,0001
serotonin,CB4856 - serotonin,JU3166	-83.63	24.69	390	-3.39	0.16
serotonin,CB4856 - serotonin,JU440	-59.83	24.69	390	-2.42	0.827
serotonin,CB4856 - serotonin,JU751	200.29	24.69	390	8.11	<0,0001
serotonin,CB4856 - serotonin,JU830	-59.17	24.69	390	-2.4	0.843
serotonin,CB4856 - serotonin,N2	-41.35	21.38	390	-1.93	0.985
serotonin,CB4856 - serotonin,NIC1786	76	24.69	390	3.08	0.333
serotonin,CB4856 - serotonin,NIC1832	222.37	25.25	390	8.81	<0,0001
serotonin,CB4856 - serotonin,QG2873	-17.58	24.69	390	-0.71	1
serotonin,CB4856 - serotonin,QX1430	2.56	21.38	390	0.12	1
serotonin,ED3005 - serotonin,JU1200	81.12	22.54	390	3.6	0.0878
serotonin,ED3005 - serotonin,JU2587	293.33	24.69	390	11.88	<0,0001
serotonin,ED3005 - serotonin,JU2593	304.81	23.42	390	13.01	<0,0001
serotonin,ED3005 - serotonin,JU2829	335.04	24.69	390	13.57	<0,0001
serotonin,ED3005 - serotonin,JU3166	11.5	24.69	390	0.47	1
serotonin,ED3005 - serotonin,JU440	35.29	24.69	390	1.43	1
serotonin,ED3005 - serotonin,JU751	295.42	24.69	390	11.96	<0,0001
serotonin,ED3005 - serotonin,JU830	35.96	24.69	390	1.46	1
serotonin,ED3005 - serotonin,N2	53.77	21.38	390	2.51	0.768
serotonin,ED3005 - serotonin,NIC1786	171.13	24.69	390	6.93	7.54e-09
serotonin,ED3005 - serotonin,NIC1832	317.5	25.25	390	12.58	<0,0001
serotonin,ED3005 - serotonin,QG2873	77.54	24.69	390	3.14	0.292
serotonin,ED3005 - serotonin,QX1430	97.69	21.38	390	4.57	0.00243
serotonin,JU1200 - serotonin,JU2587	212.21	22.54	390	9.41	<0,0001
serotonin,JU1200 - serotonin,JU2593	223.68	21.14	390	10.58	<0,0001
serotonin,JU1200 - serotonin,JU2829	253.92	22.54	390	11.26	<0,0001
serotonin,JU1200 - serotonin,JU3166	-69.62	22.54	390	-3.09	0.326
serotonin,JU1200 - serotonin,JU440	-45.83	22.54	390	-2.03	0.972
serotonin,JU1200 - serotonin,JU751	214.29	22.54	390	9.51	<0,0001
serotonin,JU1200 - serotonin,JU830	-45.17	22.54	390	-2	0.977
serotonin,JU1200 - serotonin,N2	-27.35	18.86	390	-1.45	1
serotonin,JU1200 - serotonin,NIC1786	90	22.54	390	3.99	0.0238
serotonin,JU1200 - serotonin,NIC1832	236.37	23.15	390	10.21	<0,0001
serotonin,JU1200 - serotonin,QG2873	-3.58	22.54	390	-0.16	1
serotonin,JU1200 - serotonin,QX1430	16.56	18.86	390	0.88	1
serotonin,JU2587 - serotonin,JU2593	11.47	23.42	390	0.49	1
serotonin,JU2587 - serotonin,JU2829	41.71	24.69	390	1.69	0.998
serotonin,JU2587 - serotonin,JU3166	-281.83	24.69	390	-11.41	<0,0001
serotonin,JU2587 - serotonin,JU440	-258.04	24.69	390	-10.45	<0,0001
serotonin,JU2587 - serotonin,JU751	2.08	24.69	390	0.08	1
serotonin,JU2587 - serotonin,JU830	-257.38	24.69	390	-10.42	<0,0001
serotonin,JU2587 - serotonin,N2	-239.56	21.38	390	-11.2	<0,0001
serotonin,JU2587 - serotonin,NIC1786	-122.21	24.69	390	-4.95	0.000438
serotonin,JU2587 - serotonin,NIC1832	24.16	25.25	390	0.96	1
serotonin,JU2587 - serotonin,QG2873	-215.79	24.69	390	-8.74	<0,0001
serotonin,JU2587 - serotonin,QX1430	-195.65	21.38	390	-9.15	<0,0001
serotonin,JU2593 - serotonin,JU2829	30.23	23.42	390	1.29	1
serotonin,JU2593 - serotonin,JU3166	-293.31	23.42	390	-12.52	<0,0001
serotonin,JU2593 - serotonin,JU440	-269.52	23.42	390	-11.51	<0,0001
serotonin,JU2593 - serotonin,JU751	-9.39	23.42	390	-0.4	1
serotonin,JU2593 - serotonin,JU830	-268.85	23.42	390	-11.48	<0,0001
serotonin,JU2593 - serotonin,N2	-251.04	19.91	390	-12.61	<0,0001
serotonin,JU2593 - serotonin,NIC1786	-133.68	23.42	390	-5.71	9.62e-06
serotonin,JU2593 - serotonin,NIC1832	12.69	24.01	390	0.53	1
serotonin,JU2593 - serotonin,QG2873	-227.27	23.42	390	-9.7	<0,0001
serotonin,JU2593 - serotonin,QX1430	-207.12	19.91	390	-10.4	<0,0001
serotonin,JU2829 - serotonin,JU3166	-323.54	24.69	390	-13.1	<0,0001
serotonin,JU2829 - serotonin,JU440	-299.75	24.69	390	-12.14	<0,0001
serotonin,JU2829 - serotonin,JU751	-39.62	24.69	390	-1.6	0.999
serotonin,JU2829 - serotonin,JU830	-299.08	24.69	390	-12.11	<0,0001
serotonin,JU2829 - serotonin,N2	-281.27	21.38	390	-13.15	<0,0001
serotonin,JU2829 - serotonin,NIC1786	-163.92	24.69	390	-6.64	4.6e-08
serotonin,JU2829 - serotonin,NIC1832	-17.55	25.25	390	-0.69	1
serotonin,JU2829 - serotonin,QG2873	-257.5	24.69	390	-10.43	<0,0001
serotonin,JU2829 - serotonin,QX1430	-237.35	21.38	390	-11.1	<0,0001
serotonin,JU3166 - serotonin,JU440	23.79	24.69	390	0.96	1
serotonin,JU3166 - serotonin,JU751	283.92	24.69	390	11.5	<0,0001
serotonin,JU3166 - serotonin,JU830	24.46	24.69	390	0.99	1
serotonin,JU3166 - serotonin,N2	42.27	21.38	390	1.98	0.981
serotonin,JU3166 - serotonin,NIC1786	159.63	24.69	390	6.46	1.31e-07
serotonin,JU3166 - serotonin,NIC1832	306	25.25	390	12.12	<0,0001
serotonin,JU3166 - serotonin,QG2873	66.04	24.69	390	2.67	0.649
serotonin,JU3166 - serotonin,QX1430	86.19	21.38	390	4.03	0.0207
serotonin,JU440 - serotonin,JU751	260.12	24.69	390	10.53	<0,0001
serotonin,JU440 - serotonin,JU830	0.67	24.69	390	0.03	1
serotonin,JU440 - serotonin,N2	18.48	21.38	390	0.86	1
serotonin,JU440 - serotonin,NIC1786	135.83	24.69	390	5.5	2.85e-05
serotonin,JU440 - serotonin,NIC1832	282.2	25.25	390	11.18	<0,0001
serotonin,JU440 - serotonin,QG2873	42.25	24.69	390	1.71	0.998
serotonin,JU440 - serotonin,QX1430	62.4	21.38	390	2.92	0.452
serotonin,JU751 - serotonin,JU830	-259.46	24.69	390	-10.51	<0,0001
serotonin,JU751 - serotonin,N2	-241.65	21.38	390	-11.3	<0,0001
serotonin,JU751 - serotonin,NIC1786	-124.29	24.69	390	-5.03	0.000294
serotonin,JU751 - serotonin,NIC1832	22.08	25.25	390	0.87	1
serotonin,JU751 - serotonin,QG2873	-217.88	24.69	390	-8.82	<0,0001
serotonin,JU751 - serotonin,QX1430	-197.73	21.38	390	-9.25	<0,0001
serotonin,JU830 - serotonin,N2	17.81	21.38	390	0.83	1
serotonin,JU830 - serotonin,NIC1786	135.17	24.69	390	5.47	3.28e-05
serotonin,JU830 - serotonin,NIC1832	281.54	25.25	390	11.15	<0,0001
serotonin,JU830 - serotonin,QG2873	41.58	24.69	390	1.68	0.998
serotonin,JU830 - serotonin,QX1430	61.73	21.38	390	2.89	0.477
serotonin,N2 - serotonin,NIC1786	117.35	21.38	390	5.49	3.06e-05
serotonin,N2 - serotonin,NIC1832	263.73	22.02	390	11.98	<0,0001
serotonin,N2 - serotonin,QG2873	23.77	21.38	390	1.11	1
serotonin,N2 - serotonin,QX1430	43.92	17.46	390	2.52	0.768
serotonin,NIC1786 - serotonin,NIC1832	146.37	25.25	390	5.8	5.89e-06
serotonin,NIC1786 - serotonin,QG2873	-93.58	24.69	390	-3.79	0.0479
serotonin,NIC1786 - serotonin,QX1430	-73.44	21.38	390	-3.43	0.141
serotonin,NIC1832 - serotonin,QG2873	-239.95	25.25	390	-9.5	<0,0001
serotonin,NIC1832 - serotonin,QX1430	-219.81	22.02	390	-9.98	<0,0001
serotonin,QG2873 - serotonin,QX1430	20.15	21.38	390	0.94	1

## Sheet: Figure 7B - Imipramine
Results for statistical analyses testing for the effects of and interactions between Strain and Treatment (control versus imipramine) on egg laying (Align Rank Transform ANOVA).
Term	Df	Sum of squares	F value	Pr(>F)	Sig
Treatment	1	840834	562	9.46e-63	***
Strain	14	799593	23.86	8.28e-37	***
Treatment x Strain	14	462389	8.52	1.17e-14	***
Contrasts
contrast	estimate	SE	Df	t-ratio	p-value
imipramine,CB4856 - imipramine,ED3005	-102.5	13.85	222	-7.4	1.2e-09
imipramine,CB4856 - imipramine,JU1200	-85.67	13.85	222	-6.19	1.26e-06
imipramine,CB4856 - imipramine,JU2587	-53.5	13.85	222	-3.86	0.0407
imipramine,CB4856 - imipramine,JU2593	0.33	13.85	222	0.02	1
imipramine,CB4856 - imipramine,JU2829	-18.67	13.85	222	-1.35	1
imipramine,CB4856 - imipramine,JU3166	-60.38	11.99	222	-5.03	0.00039
imipramine,CB4856 - imipramine,JU440	-24.83	13.85	222	-1.79	0.995
imipramine,CB4856 - imipramine,JU751	-60.33	13.85	222	-4.36	0.00685
imipramine,CB4856 - imipramine,JU830	-83.25	13.85	222	-6.01	3.18e-06
imipramine,CB4856 - imipramine,N2	-81.44	11.31	222	-7.2	3.95e-09
imipramine,CB4856 - imipramine,NIC1786	-102.33	13.85	222	-7.39	1.29e-09
imipramine,CB4856 - imipramine,NIC1832	-18.5	13.85	222	-1.34	1
imipramine,CB4856 - imipramine,QG2873	-35.13	11.99	222	-2.93	0.447
imipramine,CB4856 - imipramine,QX1430	-85.39	11.31	222	-7.55	4.84e-10
imipramine,CB4856 - M9,CB4856	101.75	13.85	222	7.35	1.67e-09
imipramine,CB4856 - M9,ED3005	2.42	13.85	222	0.17	1
imipramine,CB4856 - M9,JU1200	25.75	13.85	222	1.86	0.991
imipramine,CB4856 - M9,JU2587	61.58	13.85	222	4.45	0.0048
imipramine,CB4856 - M9,JU2593	104.58	13.85	222	7.55	4.83e-10
imipramine,CB4856 - M9,JU2829	63.83	13.85	222	4.61	0.00248
imipramine,CB4856 - M9,JU3166	28.54	11.99	222	2.38	0.849
imipramine,CB4856 - M9,JU440	111	13.85	222	8.01	2.75e-11
imipramine,CB4856 - M9,JU751	81	13.85	222	5.85	7.42e-06
imipramine,CB4856 - M9,JU830	88.42	13.85	222	6.38	4.27e-07
imipramine,CB4856 - M9,N2	59.11	11.31	222	5.23	0.000159
imipramine,CB4856 - M9,NIC1786	114.5	13.85	222	8.27	5.79e-12
imipramine,CB4856 - M9,NIC1832	107.67	13.85	222	7.77	1.23e-10
imipramine,CB4856 - M9,QG2873	63.29	11.99	222	5.28	0.000126
imipramine,CB4856 - M9,QX1430	40.75	11.31	222	3.6	0.0912
imipramine,ED3005 - imipramine,JU1200	16.83	13.85	222	1.22	1
imipramine,ED3005 - imipramine,JU2587	49	13.85	222	3.54	0.11
imipramine,ED3005 - imipramine,JU2593	102.83	13.85	222	7.42	1.04e-09
imipramine,ED3005 - imipramine,JU2829	83.83	13.85	222	6.05	2.55e-06
imipramine,ED3005 - imipramine,JU3166	42.13	11.99	222	3.51	0.118
imipramine,ED3005 - imipramine,JU440	77.67	13.85	222	5.61	2.52e-05
imipramine,ED3005 - imipramine,JU751	42.17	13.85	222	3.04	0.361
imipramine,ED3005 - imipramine,JU830	19.25	13.85	222	1.39	1
imipramine,ED3005 - imipramine,N2	21.06	11.31	222	1.86	0.991
imipramine,ED3005 - imipramine,NIC1786	0.17	13.85	222	0.01	1
imipramine,ED3005 - imipramine,NIC1832	84	13.85	222	6.06	2.39e-06
imipramine,ED3005 - imipramine,QG2873	67.38	11.99	222	5.62	2.4e-05
imipramine,ED3005 - imipramine,QX1430	17.11	11.31	222	1.51	1
imipramine,ED3005 - M9,CB4856	204.25	13.85	222	14.75	2.29e-14
imipramine,ED3005 - M9,ED3005	104.92	13.85	222	7.57	4.17e-10
imipramine,ED3005 - M9,JU1200	128.25	13.85	222	9.26	3.21e-13
imipramine,ED3005 - M9,JU2587	164.08	13.85	222	11.85	5.35e-14
imipramine,ED3005 - M9,JU2593	207.08	13.85	222	14.95	2.29e-14
imipramine,ED3005 - M9,JU2829	166.33	13.85	222	12.01	4.04e-14
imipramine,ED3005 - M9,JU3166	131.04	11.99	222	10.92	2.02e-13
imipramine,ED3005 - M9,JU440	213.5	13.85	222	15.41	2.29e-14
imipramine,ED3005 - M9,JU751	183.5	13.85	222	13.25	2.3e-14
imipramine,ED3005 - M9,JU830	190.92	13.85	222	13.78	2.29e-14
imipramine,ED3005 - M9,N2	161.61	11.31	222	14.29	2.29e-14
imipramine,ED3005 - M9,NIC1786	217	13.85	222	15.67	2.29e-14
imipramine,ED3005 - M9,NIC1832	210.17	13.85	222	15.17	2.29e-14
imipramine,ED3005 - M9,QG2873	165.79	11.99	222	13.82	2.29e-14
imipramine,ED3005 - M9,QX1430	143.25	11.31	222	12.67	2.43e-14
imipramine,JU1200 - imipramine,JU2587	32.17	13.85	222	2.32	0.879
imipramine,JU1200 - imipramine,JU2593	86	13.85	222	6.21	1.1e-06
imipramine,JU1200 - imipramine,JU2829	67	13.85	222	4.84	0.000934
imipramine,JU1200 - imipramine,JU3166	25.29	11.99	222	2.11	0.955
imipramine,JU1200 - imipramine,JU440	60.83	13.85	222	4.39	0.00595
imipramine,JU1200 - imipramine,JU751	25.33	13.85	222	1.83	0.993
imipramine,JU1200 - imipramine,JU830	2.42	13.85	222	0.17	1
imipramine,JU1200 - imipramine,N2	4.22	11.31	222	0.37	1
imipramine,JU1200 - imipramine,NIC1786	-16.67	13.85	222	-1.2	1
imipramine,JU1200 - imipramine,NIC1832	67.17	13.85	222	4.85	0.000886
imipramine,JU1200 - imipramine,QG2873	50.54	11.99	222	4.21	0.0118
imipramine,JU1200 - imipramine,QX1430	0.28	11.31	222	0.02	1
imipramine,JU1200 - M9,CB4856	187.42	13.85	222	13.53	2.3e-14
imipramine,JU1200 - M9,ED3005	88.08	13.85	222	6.36	4.87e-07
imipramine,JU1200 - M9,JU1200	111.42	13.85	222	8.04	2.28e-11
imipramine,JU1200 - M9,JU2587	147.25	13.85	222	10.63	2.59e-13
imipramine,JU1200 - M9,JU2593	190.25	13.85	222	13.74	2.29e-14
imipramine,JU1200 - M9,JU2829	149.5	13.85	222	10.79	2.37e-13
imipramine,JU1200 - M9,JU3166	114.21	11.99	222	9.52	3.23e-13
imipramine,JU1200 - M9,JU440	196.67	13.85	222	14.2	2.29e-14
imipramine,JU1200 - M9,JU751	166.67	13.85	222	12.03	3.95e-14
imipramine,JU1200 - M9,JU830	174.08	13.85	222	12.57	2.49e-14
imipramine,JU1200 - M9,N2	144.78	11.31	222	12.8	2.4e-14
imipramine,JU1200 - M9,NIC1786	200.17	13.85	222	14.45	2.29e-14
imipramine,JU1200 - M9,NIC1832	193.33	13.85	222	13.96	2.29e-14
imipramine,JU1200 - M9,QG2873	148.96	11.99	222	12.42	2.76e-14
imipramine,JU1200 - M9,QX1430	126.42	11.31	222	11.18	1.54e-13
imipramine,JU2587 - imipramine,JU2593	53.83	13.85	222	3.89	0.0375
imipramine,JU2587 - imipramine,JU2829	34.83	13.85	222	2.51	0.766
imipramine,JU2587 - imipramine,JU3166	-6.87	11.99	222	-0.57	1
imipramine,JU2587 - imipramine,JU440	28.67	13.85	222	2.07	0.964
imipramine,JU2587 - imipramine,JU751	-6.83	13.85	222	-0.49	1
imipramine,JU2587 - imipramine,JU830	-29.75	13.85	222	-2.15	0.945
imipramine,JU2587 - imipramine,N2	-27.94	11.31	222	-2.47	0.795
imipramine,JU2587 - imipramine,NIC1786	-48.83	13.85	222	-3.53	0.114
imipramine,JU2587 - imipramine,NIC1832	35	13.85	222	2.53	0.758
imipramine,JU2587 - imipramine,QG2873	18.38	11.99	222	1.53	1
imipramine,JU2587 - imipramine,QX1430	-31.89	11.31	222	-2.82	0.533
imipramine,JU2587 - M9,CB4856	155.25	13.85	222	11.21	1.5e-13
imipramine,JU2587 - M9,ED3005	55.92	13.85	222	4.04	0.0224
imipramine,JU2587 - M9,JU1200	79.25	13.85	222	5.72	1.42e-05
imipramine,JU2587 - M9,JU2587	115.08	13.85	222	8.31	4.49e-12
imipramine,JU2587 - M9,JU2593	158.08	13.85	222	11.41	1.1e-13
imipramine,JU2587 - M9,JU2829	117.33	13.85	222	8.47	1.78e-12
imipramine,JU2587 - M9,JU3166	82.04	11.99	222	6.84	3.28e-08
imipramine,JU2587 - M9,JU440	164.5	13.85	222	11.88	5.01e-14
imipramine,JU2587 - M9,JU751	134.5	13.85	222	9.71	2.95e-13
imipramine,JU2587 - M9,JU830	141.92	13.85	222	10.25	3.02e-13
imipramine,JU2587 - M9,N2	112.61	11.31	222	9.96	2.93e-13
imipramine,JU2587 - M9,NIC1786	168	13.85	222	12.13	3.66e-14
imipramine,JU2587 - M9,NIC1832	161.17	13.85	222	11.64	7.49e-14
imipramine,JU2587 - M9,QG2873	116.79	11.99	222	9.74	3.02e-13
imipramine,JU2587 - M9,QX1430	94.25	11.31	222	8.33	3.87e-12
imipramine,JU2593 - imipramine,JU2829	-19	13.85	222	-1.37	1
imipramine,JU2593 - imipramine,JU3166	-60.71	11.99	222	-5.06	0.000343
imipramine,JU2593 - imipramine,JU440	-25.17	13.85	222	-1.82	0.994
imipramine,JU2593 - imipramine,JU751	-60.67	13.85	222	-4.38	0.00624
imipramine,JU2593 - imipramine,JU830	-83.58	13.85	222	-6.03	2.8e-06
imipramine,JU2593 - imipramine,N2	-81.78	11.31	222	-7.23	3.32e-09
imipramine,JU2593 - imipramine,NIC1786	-102.67	13.85	222	-7.41	1.12e-09
imipramine,JU2593 - imipramine,NIC1832	-18.83	13.85	222	-1.36	1
imipramine,JU2593 - imipramine,QG2873	-35.46	11.99	222	-2.96	0.426
imipramine,JU2593 - imipramine,QX1430	-85.72	11.31	222	-7.58	4.04e-10
imipramine,JU2593 - M9,CB4856	101.42	13.85	222	7.32	1.93e-09
imipramine,JU2593 - M9,ED3005	2.08	13.85	222	0.15	1
imipramine,JU2593 - M9,JU1200	25.42	13.85	222	1.84	0.993
imipramine,JU2593 - M9,JU2587	61.25	13.85	222	4.42	0.00528
imipramine,JU2593 - M9,JU2593	104.25	13.85	222	7.53	5.59e-10
imipramine,JU2593 - M9,JU2829	63.5	13.85	222	4.58	0.00274
imipramine,JU2593 - M9,JU3166	28.21	11.99	222	2.35	0.864
imipramine,JU2593 - M9,JU440	110.67	13.85	222	7.99	3.2e-11
imipramine,JU2593 - M9,JU751	80.67	13.85	222	5.82	8.39e-06
imipramine,JU2593 - M9,JU830	88.08	13.85	222	6.36	4.87e-07
imipramine,JU2593 - M9,N2	58.78	11.31	222	5.2	0.000183
imipramine,JU2593 - M9,NIC1786	114.17	13.85	222	8.24	6.7e-12
imipramine,JU2593 - M9,NIC1832	107.33	13.85	222	7.75	1.43e-10
imipramine,JU2593 - M9,QG2873	62.96	11.99	222	5.25	0.000144
imipramine,JU2593 - M9,QX1430	40.42	11.31	222	3.57	0.0994
imipramine,JU2829 - imipramine,JU3166	-41.71	11.99	222	-3.48	0.13
imipramine,JU2829 - imipramine,JU440	-6.17	13.85	222	-0.45	1
imipramine,JU2829 - imipramine,JU751	-41.67	13.85	222	-3.01	0.387
imipramine,JU2829 - imipramine,JU830	-64.58	13.85	222	-4.66	0.00197
imipramine,JU2829 - imipramine,N2	-62.78	11.31	222	-5.55	3.33e-05
imipramine,JU2829 - imipramine,NIC1786	-83.67	13.85	222	-6.04	2.71e-06
imipramine,JU2829 - imipramine,NIC1832	0.17	13.85	222	0.01	1
imipramine,JU2829 - imipramine,QG2873	-16.46	11.99	222	-1.37	1
imipramine,JU2829 - imipramine,QX1430	-66.72	11.31	222	-5.9	5.67e-06
imipramine,JU2829 - M9,CB4856	120.42	13.85	222	8.69	6.53e-13
imipramine,JU2829 - M9,ED3005	21.08	13.85	222	1.52	1
imipramine,JU2829 - M9,JU1200	44.42	13.85	222	3.21	0.256
imipramine,JU2829 - M9,JU2587	80.25	13.85	222	5.79	9.79e-06
imipramine,JU2829 - M9,JU2593	123.25	13.85	222	8.9	3.96e-13
imipramine,JU2829 - M9,JU2829	82.5	13.85	222	5.96	4.22e-06
imipramine,JU2829 - M9,JU3166	47.21	11.99	222	3.94	0.0318
imipramine,JU2829 - M9,JU440	129.67	13.85	222	9.36	3.11e-13
imipramine,JU2829 - M9,JU751	99.67	13.85	222	7.2	4.09e-09
imipramine,JU2829 - M9,JU830	107.08	13.85	222	7.73	1.59e-10
imipramine,JU2829 - M9,N2	77.78	11.31	222	6.88	2.64e-08
imipramine,JU2829 - M9,NIC1786	133.17	13.85	222	9.61	3.13e-13
imipramine,JU2829 - M9,NIC1832	126.33	13.85	222	9.12	3.31e-13
imipramine,JU2829 - M9,QG2873	81.96	11.99	222	6.83	3.42e-08
imipramine,JU2829 - M9,QX1430	59.42	11.31	222	5.25	0.00014
imipramine,JU3166 - imipramine,JU440	35.54	11.99	222	2.96	0.421
imipramine,JU3166 - imipramine,JU751	0.04	11.99	222	0	1
imipramine,JU3166 - imipramine,JU830	-22.87	11.99	222	-1.91	0.987
imipramine,JU3166 - imipramine,N2	-21.07	8.94	222	-2.36	0.862
imipramine,JU3166 - imipramine,NIC1786	-41.96	11.99	222	-3.5	0.123
imipramine,JU3166 - imipramine,NIC1832	41.87	11.99	222	3.49	0.126
imipramine,JU3166 - imipramine,QG2873	25.25	9.79	222	2.58	0.722
imipramine,JU3166 - imipramine,QX1430	-25.01	8.94	222	-2.8	0.55
imipramine,JU3166 - M9,CB4856	162.12	11.99	222	13.52	2.3e-14
imipramine,JU3166 - M9,ED3005	62.79	11.99	222	5.23	0.000153
imipramine,JU3166 - M9,JU1200	86.13	11.99	222	7.18	4.49e-09
imipramine,JU3166 - M9,JU2587	121.96	11.99	222	10.17	2.86e-13
imipramine,JU3166 - M9,JU2593	164.96	11.99	222	13.75	2.29e-14
imipramine,JU3166 - M9,JU2829	124.21	11.99	222	10.36	2.8e-13
imipramine,JU3166 - M9,JU3166	88.92	9.79	222	9.08	3.35e-13
imipramine,JU3166 - M9,JU440	171.37	11.99	222	14.29	2.29e-14
imipramine,JU3166 - M9,JU751	141.37	11.99	222	11.79	6.06e-14
imipramine,JU3166 - M9,JU830	148.79	11.99	222	12.4	2.78e-14
imipramine,JU3166 - M9,N2	119.49	8.94	222	13.36	2.3e-14
imipramine,JU3166 - M9,NIC1786	174.88	11.99	222	14.58	2.29e-14
imipramine,JU3166 - M9,NIC1832	168.04	11.99	222	14.01	2.29e-14
imipramine,JU3166 - M9,QG2873	123.67	9.79	222	12.63	2.45e-14
imipramine,JU3166 - M9,QX1430	101.13	8.94	222	11.31	1.28e-13
imipramine,JU440 - imipramine,JU751	-35.5	13.85	222	-2.56	0.732
imipramine,JU440 - imipramine,JU830	-58.42	13.85	222	-4.22	0.0116
imipramine,JU440 - imipramine,N2	-56.61	11.31	222	-5.01	0.000442
imipramine,JU440 - imipramine,NIC1786	-77.5	13.85	222	-5.6	2.67e-05
imipramine,JU440 - imipramine,NIC1832	6.33	13.85	222	0.46	1
imipramine,JU440 - imipramine,QG2873	-10.29	11.99	222	-0.86	1
imipramine,JU440 - imipramine,QX1430	-60.56	11.31	222	-5.35	8.68e-05
imipramine,JU440 - M9,CB4856	126.58	13.85	222	9.14	3.23e-13
imipramine,JU440 - M9,ED3005	27.25	13.85	222	1.97	0.981
imipramine,JU440 - M9,JU1200	50.58	13.85	222	3.65	0.079
imipramine,JU440 - M9,JU2587	86.42	13.85	222	6.24	9.38e-07
imipramine,JU440 - M9,JU2593	129.42	13.85	222	9.34	3.17e-13
imipramine,JU440 - M9,JU2829	88.67	13.85	222	6.4	3.87e-07
imipramine,JU440 - M9,JU3166	53.37	11.99	222	4.45	0.00473
imipramine,JU440 - M9,JU440	135.83	13.85	222	9.81	3.11e-13
imipramine,JU440 - M9,JU751	105.83	13.85	222	7.64	2.78e-10
imipramine,JU440 - M9,JU830	113.25	13.85	222	8.18	1e-11
imipramine,JU440 - M9,N2	83.94	11.31	222	7.42	1.05e-09
imipramine,JU440 - M9,NIC1786	139.33	13.85	222	10.06	3.04e-13
imipramine,JU440 - M9,NIC1832	132.5	13.85	222	9.57	3.07e-13
imipramine,JU440 - M9,QG2873	88.12	11.99	222	7.35	1.66e-09
imipramine,JU440 - M9,QX1430	65.58	11.31	222	5.8	9.53e-06
imipramine,JU751 - imipramine,JU830	-22.92	13.85	222	-1.65	0.998
imipramine,JU751 - imipramine,N2	-21.11	11.31	222	-1.87	0.99
imipramine,JU751 - imipramine,NIC1786	-42	13.85	222	-3.03	0.37
imipramine,JU751 - imipramine,NIC1832	41.83	13.85	222	3.02	0.378
imipramine,JU751 - imipramine,QG2873	25.21	11.99	222	2.1	0.957
imipramine,JU751 - imipramine,QX1430	-25.06	11.31	222	-2.22	0.923
imipramine,JU751 - M9,CB4856	162.08	13.85	222	11.7	6.36e-14
imipramine,JU751 - M9,ED3005	62.75	13.85	222	4.53	0.00342
imipramine,JU751 - M9,JU1200	86.08	13.85	222	6.22	1.07e-06
imipramine,JU751 - M9,JU2587	121.92	13.85	222	8.8	4.78e-13
imipramine,JU751 - M9,JU2593	164.92	13.85	222	11.91	4.45e-14
imipramine,JU751 - M9,JU2829	124.17	13.85	222	8.96	3.58e-13
imipramine,JU751 - M9,JU3166	88.88	11.99	222	7.41	1.14e-09
imipramine,JU751 - M9,JU440	171.33	13.85	222	12.37	2.79e-14
imipramine,JU751 - M9,JU751	141.33	13.85	222	10.2	3.01e-13
imipramine,JU751 - M9,JU830	148.75	13.85	222	10.74	2.31e-13
imipramine,JU751 - M9,N2	119.44	11.31	222	10.56	2.66e-13
imipramine,JU751 - M9,NIC1786	174.83	13.85	222	12.62	2.45e-14
imipramine,JU751 - M9,NIC1832	168	13.85	222	12.13	3.66e-14
imipramine,JU751 - M9,QG2873	123.63	11.99	222	10.31	2.86e-13
imipramine,JU751 - M9,QX1430	101.08	11.31	222	8.94	3.74e-13
imipramine,JU830 - imipramine,N2	1.81	11.31	222	0.16	1
imipramine,JU830 - imipramine,NIC1786	-19.08	13.85	222	-1.38	1
imipramine,JU830 - imipramine,NIC1832	64.75	13.85	222	4.67	0.00188
imipramine,JU830 - imipramine,QG2873	48.12	11.99	222	4.01	0.0245
imipramine,JU830 - imipramine,QX1430	-2.14	11.31	222	-0.19	1
imipramine,JU830 - M9,CB4856	185	13.85	222	13.36	2.3e-14
imipramine,JU830 - M9,ED3005	85.67	13.85	222	6.19	1.26e-06
imipramine,JU830 - M9,JU1200	109	13.85	222	7.87	6.76e-11
imipramine,JU830 - M9,JU2587	144.83	13.85	222	10.46	2.9e-13
imipramine,JU830 - M9,JU2593	187.83	13.85	222	13.56	2.29e-14
imipramine,JU830 - M9,JU2829	147.08	13.85	222	10.62	2.66e-13
imipramine,JU830 - M9,JU3166	111.79	11.99	222	9.32	3.02e-13
imipramine,JU830 - M9,JU440	194.25	13.85	222	14.02	2.29e-14
imipramine,JU830 - M9,JU751	164.25	13.85	222	11.86	5.25e-14
imipramine,JU830 - M9,JU830	171.67	13.85	222	12.39	2.79e-14
imipramine,JU830 - M9,N2	142.36	11.31	222	12.59	2.48e-14
imipramine,JU830 - M9,NIC1786	197.75	13.85	222	14.28	2.29e-14
imipramine,JU830 - M9,NIC1832	190.92	13.85	222	13.78	2.29e-14
imipramine,JU830 - M9,QG2873	146.54	11.99	222	12.22	3.08e-14
imipramine,JU830 - M9,QX1430	124	11.31	222	10.96	2.01e-13
imipramine,N2 - imipramine,NIC1786	-20.89	11.31	222	-1.85	0.992
imipramine,N2 - imipramine,NIC1832	62.94	11.31	222	5.57	3.09e-05
imipramine,N2 - imipramine,QG2873	46.32	8.94	222	5.18	0.000198
imipramine,N2 - imipramine,QX1430	-3.94	8	222	-0.49	1
imipramine,N2 - M9,CB4856	183.19	11.31	222	16.2	2.29e-14
imipramine,N2 - M9,ED3005	83.86	11.31	222	7.42	1.1e-09
imipramine,N2 - M9,JU1200	107.19	11.31	222	9.48	2.99e-13
imipramine,N2 - M9,JU2587	143.03	11.31	222	12.65	2.44e-14
imipramine,N2 - M9,JU2593	186.03	11.31	222	16.45	2.29e-14
imipramine,N2 - M9,JU2829	145.28	11.31	222	12.85	2.38e-14
imipramine,N2 - M9,JU3166	109.99	8.94	222	12.3	2.92e-14
imipramine,N2 - M9,JU440	192.44	11.31	222	17.02	2.29e-14
imipramine,N2 - M9,JU751	162.44	11.31	222	14.36	2.29e-14
imipramine,N2 - M9,JU830	169.86	11.31	222	15.02	2.29e-14
imipramine,N2 - M9,N2	140.56	8	222	17.58	2.29e-14
imipramine,N2 - M9,NIC1786	195.94	11.31	222	17.33	2.29e-14
imipramine,N2 - M9,NIC1832	189.11	11.31	222	16.72	2.29e-14
imipramine,N2 - M9,QG2873	144.74	8.94	222	16.19	2.29e-14
imipramine,N2 - M9,QX1430	122.19	8	222	15.28	2.29e-14
imipramine,NIC1786 - imipramine,NIC1832	83.83	13.85	222	6.05	2.55e-06
imipramine,NIC1786 - imipramine,QG2873	67.21	11.99	222	5.6	2.57e-05
imipramine,NIC1786 - imipramine,QX1430	16.94	11.31	222	1.5	1
imipramine,NIC1786 - M9,CB4856	204.08	13.85	222	14.73	2.29e-14
imipramine,NIC1786 - M9,ED3005	104.75	13.85	222	7.56	4.49e-10
imipramine,NIC1786 - M9,JU1200	128.08	13.85	222	9.25	3.25e-13
imipramine,NIC1786 - M9,JU2587	163.92	13.85	222	11.83	5.54e-14
imipramine,NIC1786 - M9,JU2593	206.92	13.85	222	14.94	2.29e-14
imipramine,NIC1786 - M9,JU2829	166.17	13.85	222	12	4.11e-14
imipramine,NIC1786 - M9,JU3166	130.87	11.99	222	10.91	2.1e-13
imipramine,NIC1786 - M9,JU440	213.33	13.85	222	15.4	2.29e-14
imipramine,NIC1786 - M9,JU751	183.33	13.85	222	13.24	2.31e-14
imipramine,NIC1786 - M9,JU830	190.75	13.85	222	13.77	2.29e-14
imipramine,NIC1786 - M9,N2	161.44	11.31	222	14.28	2.29e-14
imipramine,NIC1786 - M9,NIC1786	216.83	13.85	222	15.66	2.29e-14
imipramine,NIC1786 - M9,NIC1832	210	13.85	222	15.16	2.29e-14
imipramine,NIC1786 - M9,QG2873	165.63	11.99	222	13.81	2.29e-14
imipramine,NIC1786 - M9,QX1430	143.08	11.31	222	12.65	2.44e-14
imipramine,NIC1832 - imipramine,QG2873	-16.62	11.99	222	-1.39	1
imipramine,NIC1832 - imipramine,QX1430	-66.89	11.31	222	-5.91	5.25e-06
imipramine,NIC1832 - M9,CB4856	120.25	13.85	222	8.68	6.84e-13
imipramine,NIC1832 - M9,ED3005	20.92	13.85	222	1.51	1
imipramine,NIC1832 - M9,JU1200	44.25	13.85	222	3.19	0.263
imipramine,NIC1832 - M9,JU2587	80.08	13.85	222	5.78	1.04e-05
imipramine,NIC1832 - M9,JU2593	123.08	13.85	222	8.89	3.87e-13
imipramine,NIC1832 - M9,JU2829	82.33	13.85	222	5.94	4.5e-06
imipramine,NIC1832 - M9,JU3166	47.04	11.99	222	3.92	0.0334
imipramine,NIC1832 - M9,JU440	129.5	13.85	222	9.35	3.15e-13
imipramine,NIC1832 - M9,JU751	99.5	13.85	222	7.18	4.4e-09
imipramine,NIC1832 - M9,JU830	106.92	13.85	222	7.72	1.72e-10
imipramine,NIC1832 - M9,N2	77.61	11.31	222	6.86	2.87e-08
imipramine,NIC1832 - M9,NIC1786	133	13.85	222	9.6	3.08e-13
imipramine,NIC1832 - M9,NIC1832	126.17	13.85	222	9.11	3.36e-13
imipramine,NIC1832 - M9,QG2873	81.79	11.99	222	6.82	3.7e-08
imipramine,NIC1832 - M9,QX1430	59.25	11.31	222	5.24	0.00015
imipramine,QG2873 - imipramine,QX1430	-50.26	8.94	222	-5.62	2.34e-05
imipramine,QG2873 - M9,CB4856	136.88	11.99	222	11.41	1.05e-13
imipramine,QG2873 - M9,ED3005	37.54	11.99	222	3.13	0.303
imipramine,QG2873 - M9,JU1200	60.88	11.99	222	5.08	0.000322
imipramine,QG2873 - M9,JU2587	96.71	11.99	222	8.06	2.04e-11
imipramine,QG2873 - M9,JU2593	139.71	11.99	222	11.65	7.34e-14
imipramine,QG2873 - M9,JU2829	98.96	11.99	222	8.25	6.41e-12
imipramine,QG2873 - M9,JU3166	63.67	9.79	222	6.5	2.23e-07
imipramine,QG2873 - M9,JU440	146.12	11.99	222	12.18	3.13e-14
imipramine,QG2873 - M9,JU751	116.13	11.99	222	9.68	3.02e-13
imipramine,QG2873 - M9,JU830	123.54	11.99	222	10.3	2.91e-13
imipramine,QG2873 - M9,N2	94.24	8.94	222	10.54	2.6e-13
imipramine,QG2873 - M9,NIC1786	149.63	11.99	222	12.47	2.7e-14
imipramine,QG2873 - M9,NIC1832	142.79	11.99	222	11.9	4.5e-14
imipramine,QG2873 - M9,QG2873	98.42	9.79	222	10.05	3.05e-13
imipramine,QG2873 - M9,QX1430	75.88	8.94	222	8.49	1.65e-12
imipramine,QX1430 - M9,CB4856	187.14	11.31	222	16.55	2.29e-14
imipramine,QX1430 - M9,ED3005	87.81	11.31	222	7.76	1.3e-10
imipramine,QX1430 - M9,JU1200	111.14	11.31	222	9.83	3.05e-13
imipramine,QX1430 - M9,JU2587	146.97	11.31	222	13	2.32e-14
imipramine,QX1430 - M9,JU2593	189.97	11.31	222	16.8	2.29e-14
imipramine,QX1430 - M9,JU2829	149.22	11.31	222	13.2	2.31e-14
imipramine,QX1430 - M9,JU3166	113.93	8.94	222	12.74	2.41e-14
imipramine,QX1430 - M9,JU440	196.39	11.31	222	17.37	2.29e-14
imipramine,QX1430 - M9,JU751	166.39	11.31	222	14.71	2.29e-14
imipramine,QX1430 - M9,JU830	173.81	11.31	222	15.37	2.29e-14
imipramine,QX1430 - M9,N2	144.5	8	222	18.07	2.29e-14
imipramine,QX1430 - M9,NIC1786	199.89	11.31	222	17.68	2.29e-14
imipramine,QX1430 - M9,NIC1832	193.06	11.31	222	17.07	2.29e-14
imipramine,QX1430 - M9,QG2873	148.68	8.94	222	16.63	2.29e-14
imipramine,QX1430 - M9,QX1430	126.14	8	222	15.77	2.29e-14
M9,CB4856 - M9,ED3005	-99.33	13.85	222	-7.17	4.72e-09
M9,CB4856 - M9,JU1200	-76	13.85	222	-5.49	4.56e-05
M9,CB4856 - M9,JU2587	-40.17	13.85	222	-2.9	0.469
M9,CB4856 - M9,JU2593	2.83	13.85	222	0.2	1
M9,CB4856 - M9,JU2829	-37.92	13.85	222	-2.74	0.599
M9,CB4856 - M9,JU3166	-73.21	11.99	222	-6.1	1.95e-06
M9,CB4856 - M9,JU440	9.25	13.85	222	0.67	1
M9,CB4856 - M9,JU751	-20.75	13.85	222	-1.5	1
M9,CB4856 - M9,JU830	-13.33	13.85	222	-0.96	1
M9,CB4856 - M9,N2	-42.64	11.31	222	-3.77	0.0548
M9,CB4856 - M9,NIC1786	12.75	13.85	222	0.92	1
M9,CB4856 - M9,NIC1832	5.92	13.85	222	0.43	1
M9,CB4856 - M9,QG2873	-38.46	11.99	222	-3.21	0.257
M9,CB4856 - M9,QX1430	-61	11.31	222	-5.39	7.18e-05
M9,ED3005 - M9,JU1200	23.33	13.85	222	1.68	0.998
M9,ED3005 - M9,JU2587	59.17	13.85	222	4.27	0.00948
M9,ED3005 - M9,JU2593	102.17	13.85	222	7.38	1.39e-09
M9,ED3005 - M9,JU2829	61.42	13.85	222	4.43	0.00504
M9,ED3005 - M9,JU3166	26.13	11.99	222	2.18	0.936
M9,ED3005 - M9,JU440	108.58	13.85	222	7.84	8.15e-11
M9,ED3005 - M9,JU751	78.58	13.85	222	5.67	1.8e-05
M9,ED3005 - M9,JU830	86	13.85	222	6.21	1.1e-06
M9,ED3005 - M9,N2	56.69	11.31	222	5.01	0.000427
M9,ED3005 - M9,NIC1786	112.08	13.85	222	8.09	1.69e-11
M9,ED3005 - M9,NIC1832	105.25	13.85	222	7.6	3.6e-10
M9,ED3005 - M9,QG2873	60.88	11.99	222	5.08	0.000322
M9,ED3005 - M9,QX1430	38.33	11.31	222	3.39	0.165
M9,JU1200 - M9,JU2587	35.83	13.85	222	2.59	0.715
M9,JU1200 - M9,JU2593	78.83	13.85	222	5.69	1.65e-05
M9,JU1200 - M9,JU2829	38.08	13.85	222	2.75	0.589
M9,JU1200 - M9,JU3166	2.79	11.99	222	0.23	1
M9,JU1200 - M9,JU440	85.25	13.85	222	6.15	1.48e-06
M9,JU1200 - M9,JU751	55.25	13.85	222	3.99	0.0265
M9,JU1200 - M9,JU830	62.67	13.85	222	4.52	0.0035
M9,JU1200 - M9,N2	33.36	11.31	222	2.95	0.43
M9,JU1200 - M9,NIC1786	88.75	13.85	222	6.41	3.74e-07
M9,JU1200 - M9,NIC1832	81.92	13.85	222	5.91	5.26e-06
M9,JU1200 - M9,QG2873	37.54	11.99	222	3.13	0.303
M9,JU1200 - M9,QX1430	15	11.31	222	1.33	1
M9,JU2587 - M9,JU2593	43	13.85	222	3.1	0.32
M9,JU2587 - M9,JU2829	2.25	13.85	222	0.16	1
M9,JU2587 - M9,JU3166	-33.04	11.99	222	-2.75	0.585
M9,JU2587 - M9,JU440	49.42	13.85	222	3.57	0.101
M9,JU2587 - M9,JU751	19.42	13.85	222	1.4	1
M9,JU2587 - M9,JU830	26.83	13.85	222	1.94	0.984
M9,JU2587 - M9,N2	-2.47	11.31	222	-0.22	1
M9,JU2587 - M9,NIC1786	52.92	13.85	222	3.82	0.0467
M9,JU2587 - M9,NIC1832	46.08	13.85	222	3.33	0.193
M9,JU2587 - M9,QG2873	1.71	11.99	222	0.14	1
M9,JU2587 - M9,QX1430	-20.83	11.31	222	-1.84	0.992
M9,JU2593 - M9,JU2829	-40.75	13.85	222	-2.94	0.436
M9,JU2593 - M9,JU3166	-76.04	11.99	222	-6.34	5.44e-07
M9,JU2593 - M9,JU440	6.42	13.85	222	0.46	1
M9,JU2593 - M9,JU751	-23.58	13.85	222	-1.7	0.998
M9,JU2593 - M9,JU830	-16.17	13.85	222	-1.17	1
M9,JU2593 - M9,N2	-45.47	11.31	222	-4.02	0.0237
M9,JU2593 - M9,NIC1786	9.92	13.85	222	0.72	1
M9,JU2593 - M9,NIC1832	3.08	13.85	222	0.22	1
M9,JU2593 - M9,QG2873	-41.29	11.99	222	-3.44	0.143
M9,JU2593 - M9,QX1430	-63.83	11.31	222	-5.64	2.09e-05
M9,JU2829 - M9,JU3166	-35.29	11.99	222	-2.94	0.436
M9,JU2829 - M9,JU440	47.17	13.85	222	3.41	0.158
M9,JU2829 - M9,JU751	17.17	13.85	222	1.24	1
M9,JU2829 - M9,JU830	24.58	13.85	222	1.77	0.995
M9,JU2829 - M9,N2	-4.72	11.31	222	-0.42	1
M9,JU2829 - M9,NIC1786	50.67	13.85	222	3.66	0.0776
M9,JU2829 - M9,NIC1832	43.83	13.85	222	3.16	0.281
M9,JU2829 - M9,QG2873	-0.54	11.99	222	-0.05	1
M9,JU2829 - M9,QX1430	-23.08	11.31	222	-2.04	0.969
M9,JU3166 - M9,JU440	82.46	11.99	222	6.87	2.69e-08
M9,JU3166 - M9,JU751	52.46	11.99	222	4.37	0.00641
M9,JU3166 - M9,JU830	59.87	11.99	222	4.99	0.000471
M9,JU3166 - M9,N2	30.57	8.94	222	3.42	0.152
M9,JU3166 - M9,NIC1786	85.96	11.99	222	7.17	4.88e-09
M9,JU3166 - M9,NIC1832	79.13	11.99	222	6.6	1.31e-07
M9,JU3166 - M9,QG2873	34.75	9.79	222	3.55	0.107
M9,JU3166 - M9,QX1430	12.21	8.94	222	1.37	1
M9,JU440 - M9,JU751	-30	13.85	222	-2.17	0.939
M9,JU440 - M9,JU830	-22.58	13.85	222	-1.63	0.999
M9,JU440 - M9,N2	-51.89	11.31	222	-4.59	0.0027
M9,JU440 - M9,NIC1786	3.5	13.85	222	0.25	1
M9,JU440 - M9,NIC1832	-3.33	13.85	222	-0.24	1
M9,JU440 - M9,QG2873	-47.71	11.99	222	-3.98	0.0276
M9,JU440 - M9,QX1430	-70.25	11.31	222	-6.21	1.09e-06
M9,JU751 - M9,JU830	7.42	13.85	222	0.54	1
M9,JU751 - M9,N2	-21.89	11.31	222	-1.94	0.984
M9,JU751 - M9,NIC1786	33.5	13.85	222	2.42	0.827
M9,JU751 - M9,NIC1832	26.67	13.85	222	1.93	0.985
M9,JU751 - M9,QG2873	-17.71	11.99	222	-1.48	1
M9,JU751 - M9,QX1430	-40.25	11.31	222	-3.56	0.104
M9,JU830 - M9,N2	-29.31	11.31	222	-2.59	0.712
M9,JU830 - M9,NIC1786	26.08	13.85	222	1.88	0.989
M9,JU830 - M9,NIC1832	19.25	13.85	222	1.39	1
M9,JU830 - M9,QG2873	-25.12	11.99	222	-2.09	0.958
M9,JU830 - M9,QX1430	-47.67	11.31	222	-4.21	0.0117
M9,N2 - M9,NIC1786	55.39	11.31	222	4.9	0.000716
M9,N2 - M9,NIC1832	48.56	11.31	222	4.29	0.00872
M9,N2 - M9,QG2873	4.18	8.94	222	0.47	1
M9,N2 - M9,QX1430	-18.36	8	222	-2.3	0.891
M9,NIC1786 - M9,NIC1832	-6.83	13.85	222	-0.49	1
M9,NIC1786 - M9,QG2873	-51.21	11.99	222	-4.27	0.00957
M9,NIC1786 - M9,QX1430	-73.75	11.31	222	-6.52	1.99e-07
M9,NIC1832 - M9,QG2873	-44.38	11.99	222	-3.7	0.0684
M9,NIC1832 - M9,QX1430	-66.92	11.31	222	-5.92	5.19e-06
M9,QG2873 - M9,QX1430	-22.54	8.94	222	-2.52	0.762

## Sheet: Figure 7B - Fluoxetine
Results for statistical analyses testing for the effects of and interactions between Strain and Treatment (control versus fluoxetine) on egg laying (Align Rank Transform ANOVA).
Term	Df	Sum of squares	F value	Pr(>F)
Treatment	1	3.91166e+06	1005	1.63e-108
Strain	14	2.95343e+06	30.09	5.43e-53
Treatment x Strain	14	2.11887e+06	16.35	2.91e-31
Contrasts
Contrast	Estimate	Se	Df	t-ratio	p-value
fluoxetine,CB4856 - fluoxetine,ED3005	66.71	18.1	378	3.69	0.0672
fluoxetine,CB4856 - fluoxetine,JU1200	-10.54	18.1	378	-0.58	1
fluoxetine,CB4856 - fluoxetine,JU2587	51.37	18.1	378	2.84	0.515
fluoxetine,CB4856 - fluoxetine,JU2593	83.37	18.1	378	4.61	0.00207
fluoxetine,CB4856 - fluoxetine,JU2829	-38.29	18.1	378	-2.12	0.955
fluoxetine,CB4856 - fluoxetine,JU3166	-3.62	18.1	378	-0.2	1
fluoxetine,CB4856 - fluoxetine,JU440	-5.79	18.1	378	-0.32	1
fluoxetine,CB4856 - fluoxetine,JU751	32.96	18.1	378	1.82	0.994
fluoxetine,CB4856 - fluoxetine,JU830	37.33	18.1	378	2.06	0.967
fluoxetine,CB4856 - fluoxetine,N2	-69.31	15.67	378	-4.42	0.00452
fluoxetine,CB4856 - fluoxetine,NIC1786	-10	18.1	378	-0.55	1
fluoxetine,CB4856 - fluoxetine,NIC1832	63.37	18.1	378	3.5	0.117
fluoxetine,CB4856 - fluoxetine,QG2873	70.67	18.1	378	3.91	0.0325
fluoxetine,CB4856 - fluoxetine,QX1430	-41.17	15.67	378	-2.63	0.686
fluoxetine,CB4856 - M9,CB4856	255	18.1	378	14.09	<0,0001
fluoxetine,CB4856 - M9,ED3005	216	18.1	378	11.94	<0,0001
fluoxetine,CB4856 - M9,JU1200	227.62	18.1	378	12.58	<0,0001
fluoxetine,CB4856 - M9,JU2587	227.25	18.1	378	12.56	<0,0001
fluoxetine,CB4856 - M9,JU2593	253.62	18.1	378	14.02	<0,0001
fluoxetine,CB4856 - M9,JU2829	136.62	18.1	378	7.55	1.32e-10
fluoxetine,CB4856 - M9,JU3166	133	18.1	378	7.35	5.26e-10
fluoxetine,CB4856 - M9,JU440	215.37	18.1	378	11.9	<0,0001
fluoxetine,CB4856 - M9,JU751	250.29	18.1	378	13.83	<0,0001
fluoxetine,CB4856 - M9,JU830	182.17	18.1	378	10.07	<0,0001
fluoxetine,CB4856 - M9,N2	175.48	15.67	378	11.2	<0,0001
fluoxetine,CB4856 - M9,NIC1786	270.67	18.1	378	14.96	<0,0001
fluoxetine,CB4856 - M9,NIC1832	247.54	18.1	378	13.68	<0,0001
fluoxetine,CB4856 - M9,QG2873	179.87	18.1	378	9.94	<0,0001
fluoxetine,CB4856 - M9,QX1430	182.04	15.67	378	11.62	<0,0001
fluoxetine,ED3005 - fluoxetine,JU1200	-77.25	18.1	378	-4.27	0.00842
fluoxetine,ED3005 - fluoxetine,JU2587	-15.33	18.1	378	-0.85	1
fluoxetine,ED3005 - fluoxetine,JU2593	16.67	18.1	378	0.92	1
fluoxetine,ED3005 - fluoxetine,JU2829	-105	18.1	378	-5.8	5.86e-06
fluoxetine,ED3005 - fluoxetine,JU3166	-70.33	18.1	378	-3.89	0.0347
fluoxetine,ED3005 - fluoxetine,JU440	-72.5	18.1	378	-4.01	0.0227
fluoxetine,ED3005 - fluoxetine,JU751	-33.75	18.1	378	-1.87	0.991
fluoxetine,ED3005 - fluoxetine,JU830	-29.37	18.1	378	-1.62	0.999
fluoxetine,ED3005 - fluoxetine,N2	-136.02	15.67	378	-8.68	<0,0001
fluoxetine,ED3005 - fluoxetine,NIC1786	-76.71	18.1	378	-4.24	0.00947
fluoxetine,ED3005 - fluoxetine,NIC1832	-3.33	18.1	378	-0.18	1
fluoxetine,ED3005 - fluoxetine,QG2873	3.96	18.1	378	0.22	1
fluoxetine,ED3005 - fluoxetine,QX1430	-107.88	15.67	378	-6.88	1.05e-08
fluoxetine,ED3005 - M9,CB4856	188.29	18.1	378	10.41	<0,0001
fluoxetine,ED3005 - M9,ED3005	149.29	18.1	378	8.25	<0,0001
fluoxetine,ED3005 - M9,JU1200	160.92	18.1	378	8.89	<0,0001
fluoxetine,ED3005 - M9,JU2587	160.54	18.1	378	8.87	<0,0001
fluoxetine,ED3005 - M9,JU2593	186.92	18.1	378	10.33	<0,0001
fluoxetine,ED3005 - M9,JU2829	69.92	18.1	378	3.86	0.0375
fluoxetine,ED3005 - M9,JU3166	66.29	18.1	378	3.66	0.0722
fluoxetine,ED3005 - M9,JU440	148.67	18.1	378	8.22	<0,0001
fluoxetine,ED3005 - M9,JU751	183.58	18.1	378	10.15	<0,0001
fluoxetine,ED3005 - M9,JU830	115.46	18.1	378	6.38	2.22e-07
fluoxetine,ED3005 - M9,N2	108.77	15.67	378	6.94	7.37e-09
fluoxetine,ED3005 - M9,NIC1786	203.96	18.1	378	11.27	<0,0001
fluoxetine,ED3005 - M9,NIC1832	180.83	18.1	378	9.99	<0,0001
fluoxetine,ED3005 - M9,QG2873	113.17	18.1	378	6.25	4.65e-07
fluoxetine,ED3005 - M9,QX1430	115.33	15.67	378	7.36	4.93e-10
fluoxetine,JU1200 - fluoxetine,JU2587	61.92	18.1	378	3.42	0.146
fluoxetine,JU1200 - fluoxetine,JU2593	93.92	18.1	378	5.19	0.00014
fluoxetine,JU1200 - fluoxetine,JU2829	-27.75	18.1	378	-1.53	1
fluoxetine,JU1200 - fluoxetine,JU3166	6.92	18.1	378	0.38	1
fluoxetine,JU1200 - fluoxetine,JU440	4.75	18.1	378	0.26	1
fluoxetine,JU1200 - fluoxetine,JU751	43.5	18.1	378	2.4	0.838
fluoxetine,JU1200 - fluoxetine,JU830	47.88	18.1	378	2.65	0.671
fluoxetine,JU1200 - fluoxetine,N2	-58.77	15.67	378	-3.75	0.0548
fluoxetine,JU1200 - fluoxetine,NIC1786	0.54	18.1	378	0.03	1
fluoxetine,JU1200 - fluoxetine,NIC1832	73.92	18.1	378	4.08	0.0171
fluoxetine,JU1200 - fluoxetine,QG2873	81.21	18.1	378	4.49	0.00345
fluoxetine,JU1200 - fluoxetine,QX1430	-30.62	15.67	378	-1.95	0.983
fluoxetine,JU1200 - M9,CB4856	265.54	18.1	378	14.67	<0,0001
fluoxetine,JU1200 - M9,ED3005	226.54	18.1	378	12.52	<0,0001
fluoxetine,JU1200 - M9,JU1200	238.17	18.1	378	13.16	<0,0001
fluoxetine,JU1200 - M9,JU2587	237.79	18.1	378	13.14	<0,0001
fluoxetine,JU1200 - M9,JU2593	264.17	18.1	378	14.6	<0,0001
fluoxetine,JU1200 - M9,JU2829	147.17	18.1	378	8.13	<0,0001
fluoxetine,JU1200 - M9,JU3166	143.54	18.1	378	7.93	5.48e-14
fluoxetine,JU1200 - M9,JU440	225.92	18.1	378	12.48	<0,0001
fluoxetine,JU1200 - M9,JU751	260.83	18.1	378	14.41	<0,0001
fluoxetine,JU1200 - M9,JU830	192.71	18.1	378	10.65	<0,0001
fluoxetine,JU1200 - M9,N2	186.02	15.67	378	11.87	<0,0001
fluoxetine,JU1200 - M9,NIC1786	281.21	18.1	378	15.54	<0,0001
fluoxetine,JU1200 - M9,NIC1832	258.08	18.1	378	14.26	<0,0001
fluoxetine,JU1200 - M9,QG2873	190.42	18.1	378	10.52	<0,0001
fluoxetine,JU1200 - M9,QX1430	192.58	15.67	378	12.29	<0,0001
fluoxetine,JU2587 - fluoxetine,JU2593	32	18.1	378	1.77	0.996
fluoxetine,JU2587 - fluoxetine,JU2829	-89.67	18.1	378	-4.96	0.000431
fluoxetine,JU2587 - fluoxetine,JU3166	-55	18.1	378	-3.04	0.361
fluoxetine,JU2587 - fluoxetine,JU440	-57.17	18.1	378	-3.16	0.28
fluoxetine,JU2587 - fluoxetine,JU751	-18.42	18.1	378	-1.02	1
fluoxetine,JU2587 - fluoxetine,JU830	-14.04	18.1	378	-0.78	1
fluoxetine,JU2587 - fluoxetine,N2	-120.69	15.67	378	-7.7	4.11e-11
fluoxetine,JU2587 - fluoxetine,NIC1786	-61.38	18.1	378	-3.39	0.158
fluoxetine,JU2587 - fluoxetine,NIC1832	12	18.1	378	0.66	1
fluoxetine,JU2587 - fluoxetine,QG2873	19.29	18.1	378	1.07	1
fluoxetine,JU2587 - fluoxetine,QX1430	-92.54	15.67	378	-5.91	3.34e-06
fluoxetine,JU2587 - M9,CB4856	203.62	18.1	378	11.25	<0,0001
fluoxetine,JU2587 - M9,ED3005	164.62	18.1	378	9.1	<0,0001
fluoxetine,JU2587 - M9,JU1200	176.25	18.1	378	9.74	<0,0001
fluoxetine,JU2587 - M9,JU2587	175.88	18.1	378	9.72	<0,0001
fluoxetine,JU2587 - M9,JU2593	202.25	18.1	378	11.18	<0,0001
fluoxetine,JU2587 - M9,JU2829	85.25	18.1	378	4.71	0.00131
fluoxetine,JU2587 - M9,JU3166	81.62	18.1	378	4.51	0.00313
fluoxetine,JU2587 - M9,JU440	164	18.1	378	9.06	<0,0001
fluoxetine,JU2587 - M9,JU751	198.92	18.1	378	10.99	<0,0001
fluoxetine,JU2587 - M9,JU830	130.79	18.1	378	7.23	1.18e-09
fluoxetine,JU2587 - M9,N2	124.1	15.67	378	7.92	1.07e-12
fluoxetine,JU2587 - M9,NIC1786	219.29	18.1	378	12.12	<0,0001
fluoxetine,JU2587 - M9,NIC1832	196.17	18.1	378	10.84	<0,0001
fluoxetine,JU2587 - M9,QG2873	128.5	18.1	378	7.1	2.67e-09
fluoxetine,JU2587 - M9,QX1430	130.67	15.67	378	8.34	<0,0001
fluoxetine,JU2593 - fluoxetine,JU2829	-121.67	18.1	378	-6.72	2.84e-08
fluoxetine,JU2593 - fluoxetine,JU3166	-87	18.1	378	-4.81	0.000851
fluoxetine,JU2593 - fluoxetine,JU440	-89.17	18.1	378	-4.93	0.000491
fluoxetine,JU2593 - fluoxetine,JU751	-50.42	18.1	378	-2.79	0.559
fluoxetine,JU2593 - fluoxetine,JU830	-46.04	18.1	378	-2.54	0.747
fluoxetine,JU2593 - fluoxetine,N2	-152.69	15.67	378	-9.74	<0,0001
fluoxetine,JU2593 - fluoxetine,NIC1786	-93.38	18.1	378	-5.16	0.000162
fluoxetine,JU2593 - fluoxetine,NIC1832	-20	18.1	378	-1.11	1
fluoxetine,JU2593 - fluoxetine,QG2873	-12.71	18.1	378	-0.7	1
fluoxetine,JU2593 - fluoxetine,QX1430	-124.54	15.67	378	-7.95	<0,0001
fluoxetine,JU2593 - M9,CB4856	171.62	18.1	378	9.48	<0,0001
fluoxetine,JU2593 - M9,ED3005	132.62	18.1	378	7.33	6.04e-10
fluoxetine,JU2593 - M9,JU1200	144.25	18.1	378	7.97	<0,0001
fluoxetine,JU2593 - M9,JU2587	143.88	18.1	378	7.95	<0,0001
fluoxetine,JU2593 - M9,JU2593	170.25	18.1	378	9.41	<0,0001
fluoxetine,JU2593 - M9,JU2829	53.25	18.1	378	2.94	0.433
fluoxetine,JU2593 - M9,JU3166	49.62	18.1	378	2.74	0.594
fluoxetine,JU2593 - M9,JU440	132	18.1	378	7.29	7.59e-10
fluoxetine,JU2593 - M9,JU751	166.92	18.1	378	9.22	<0,0001
fluoxetine,JU2593 - M9,JU830	98.79	18.1	378	5.46	3.6e-05
fluoxetine,JU2593 - M9,N2	92.1	15.67	378	5.88	3.89e-06
fluoxetine,JU2593 - M9,NIC1786	187.29	18.1	378	10.35	<0,0001
fluoxetine,JU2593 - M9,NIC1832	164.17	18.1	378	9.07	<0,0001
fluoxetine,JU2593 - M9,QG2873	96.5	18.1	378	5.33	6.86e-05
fluoxetine,JU2593 - M9,QX1430	98.67	15.67	378	6.3	3.64e-07
fluoxetine,JU2829 - fluoxetine,JU3166	34.67	18.1	378	1.92	0.987
fluoxetine,JU2829 - fluoxetine,JU440	32.5	18.1	378	1.8	0.995
fluoxetine,JU2829 - fluoxetine,JU751	71.25	18.1	378	3.94	0.0291
fluoxetine,JU2829 - fluoxetine,JU830	75.63	18.1	378	4.18	0.0119
fluoxetine,JU2829 - fluoxetine,N2	-31.02	15.67	378	-1.98	0.98
fluoxetine,JU2829 - fluoxetine,NIC1786	28.29	18.1	378	1.56	0.999
fluoxetine,JU2829 - fluoxetine,NIC1832	101.67	18.1	378	5.62	1.57e-05
fluoxetine,JU2829 - fluoxetine,QG2873	108.96	18.1	378	6.02	1.75e-06
fluoxetine,JU2829 - fluoxetine,QX1430	-2.87	15.67	378	-0.18	1
fluoxetine,JU2829 - M9,CB4856	293.29	18.1	378	16.21	<0,0001
fluoxetine,JU2829 - M9,ED3005	254.29	18.1	378	14.05	<0,0001
fluoxetine,JU2829 - M9,JU1200	265.92	18.1	378	14.7	<0,0001
fluoxetine,JU2829 - M9,JU2587	265.54	18.1	378	14.67	<0,0001
fluoxetine,JU2829 - M9,JU2593	291.92	18.1	378	16.13	<0,0001
fluoxetine,JU2829 - M9,JU2829	174.92	18.1	378	9.67	<0,0001
fluoxetine,JU2829 - M9,JU3166	171.29	18.1	378	9.47	<0,0001
fluoxetine,JU2829 - M9,JU440	253.67	18.1	378	14.02	<0,0001
fluoxetine,JU2829 - M9,JU751	288.58	18.1	378	15.95	<0,0001
fluoxetine,JU2829 - M9,JU830	220.46	18.1	378	12.18	<0,0001
fluoxetine,JU2829 - M9,N2	213.77	15.67	378	13.64	<0,0001
fluoxetine,JU2829 - M9,NIC1786	308.96	18.1	378	17.07	<0,0001
fluoxetine,JU2829 - M9,NIC1832	285.83	18.1	378	15.8	<0,0001
fluoxetine,JU2829 - M9,QG2873	218.17	18.1	378	12.06	<0,0001
fluoxetine,JU2829 - M9,QX1430	220.33	15.67	378	14.06	<0,0001
fluoxetine,JU3166 - fluoxetine,JU440	-2.17	18.1	378	-0.12	1
fluoxetine,JU3166 - fluoxetine,JU751	36.58	18.1	378	2.02	0.974
fluoxetine,JU3166 - fluoxetine,JU830	40.96	18.1	378	2.26	0.907
fluoxetine,JU3166 - fluoxetine,N2	-65.69	15.67	378	-4.19	0.0114
fluoxetine,JU3166 - fluoxetine,NIC1786	-6.38	18.1	378	-0.35	1
fluoxetine,JU3166 - fluoxetine,NIC1832	67	18.1	378	3.7	0.0638
fluoxetine,JU3166 - fluoxetine,QG2873	74.29	18.1	378	4.11	0.0158
fluoxetine,JU3166 - fluoxetine,QX1430	-37.54	15.67	378	-2.4	0.843
fluoxetine,JU3166 - M9,CB4856	258.62	18.1	378	14.29	<0,0001
fluoxetine,JU3166 - M9,ED3005	219.62	18.1	378	12.14	<0,0001
fluoxetine,JU3166 - M9,JU1200	231.25	18.1	378	12.78	<0,0001
fluoxetine,JU3166 - M9,JU2587	230.87	18.1	378	12.76	<0,0001
fluoxetine,JU3166 - M9,JU2593	257.25	18.1	378	14.22	<0,0001
fluoxetine,JU3166 - M9,JU2829	140.25	18.1	378	7.75	2.64e-11
fluoxetine,JU3166 - M9,JU3166	136.62	18.1	378	7.55	1.32e-10
fluoxetine,JU3166 - M9,JU440	219	18.1	378	12.1	<0,0001
fluoxetine,JU3166 - M9,JU751	253.92	18.1	378	14.03	<0,0001
fluoxetine,JU3166 - M9,JU830	185.79	18.1	378	10.27	<0,0001
fluoxetine,JU3166 - M9,N2	179.1	15.67	378	11.43	<0,0001
fluoxetine,JU3166 - M9,NIC1786	274.29	18.1	378	15.16	<0,0001
fluoxetine,JU3166 - M9,NIC1832	251.17	18.1	378	13.88	<0,0001
fluoxetine,JU3166 - M9,QG2873	183.5	18.1	378	10.14	<0,0001
fluoxetine,JU3166 - M9,QX1430	185.67	15.67	378	11.85	<0,0001
fluoxetine,JU440 - fluoxetine,JU751	38.75	18.1	378	2.14	0.948
fluoxetine,JU440 - fluoxetine,JU830	43.13	18.1	378	2.38	0.85
fluoxetine,JU440 - fluoxetine,N2	-63.52	15.67	378	-4.05	0.0192
fluoxetine,JU440 - fluoxetine,NIC1786	-4.21	18.1	378	-0.23	1
fluoxetine,JU440 - fluoxetine,NIC1832	69.17	18.1	378	3.82	0.0432
fluoxetine,JU440 - fluoxetine,QG2873	76.46	18.1	378	4.23	0.01
fluoxetine,JU440 - fluoxetine,QX1430	-35.38	15.67	378	-2.26	0.91
fluoxetine,JU440 - M9,CB4856	260.79	18.1	378	14.41	<0,0001
fluoxetine,JU440 - M9,ED3005	221.79	18.1	378	12.26	<0,0001
fluoxetine,JU440 - M9,JU1200	233.42	18.1	378	12.9	<0,0001
fluoxetine,JU440 - M9,JU2587	233.04	18.1	378	12.88	<0,0001
fluoxetine,JU440 - M9,JU2593	259.42	18.1	378	14.34	<0,0001
fluoxetine,JU440 - M9,JU2829	142.42	18.1	378	7.87	5.74e-12
fluoxetine,JU440 - M9,JU3166	138.79	18.1	378	7.67	5.33e-11
fluoxetine,JU440 - M9,JU440	221.17	18.1	378	12.22	<0,0001
fluoxetine,JU440 - M9,JU751	256.08	18.1	378	14.15	<0,0001
fluoxetine,JU440 - M9,JU830	187.96	18.1	378	10.39	<0,0001
fluoxetine,JU440 - M9,N2	181.27	15.67	378	11.57	<0,0001
fluoxetine,JU440 - M9,NIC1786	276.46	18.1	378	15.28	<0,0001
fluoxetine,JU440 - M9,NIC1832	253.33	18.1	378	14	<0,0001
fluoxetine,JU440 - M9,QG2873	185.67	18.1	378	10.26	<0,0001
fluoxetine,JU440 - M9,QX1430	187.83	15.67	378	11.99	<0,0001
fluoxetine,JU751 - fluoxetine,JU830	4.37	18.1	378	0.24	1
fluoxetine,JU751 - fluoxetine,N2	-102.27	15.67	378	-6.53	9.38e-08
fluoxetine,JU751 - fluoxetine,NIC1786	-42.96	18.1	378	-2.37	0.855
fluoxetine,JU751 - fluoxetine,NIC1832	30.42	18.1	378	1.68	0.998
fluoxetine,JU751 - fluoxetine,QG2873	37.71	18.1	378	2.08	0.962
fluoxetine,JU751 - fluoxetine,QX1430	-74.13	15.67	378	-4.73	0.00121
fluoxetine,JU751 - M9,CB4856	222.04	18.1	378	12.27	<0,0001
fluoxetine,JU751 - M9,ED3005	183.04	18.1	378	10.12	<0,0001
fluoxetine,JU751 - M9,JU1200	194.67	18.1	378	10.76	<0,0001
fluoxetine,JU751 - M9,JU2587	194.29	18.1	378	10.74	<0,0001
fluoxetine,JU751 - M9,JU2593	220.67	18.1	378	12.19	<0,0001
fluoxetine,JU751 - M9,JU2829	103.67	18.1	378	5.73	8.72e-06
fluoxetine,JU751 - M9,JU3166	100.04	18.1	378	5.53	2.52e-05
fluoxetine,JU751 - M9,JU440	182.42	18.1	378	10.08	<0,0001
fluoxetine,JU751 - M9,JU751	217.33	18.1	378	12.01	<0,0001
fluoxetine,JU751 - M9,JU830	149.21	18.1	378	8.25	<0,0001
fluoxetine,JU751 - M9,N2	142.52	15.67	378	9.09	<0,0001
fluoxetine,JU751 - M9,NIC1786	237.71	18.1	378	13.14	<0,0001
fluoxetine,JU751 - M9,NIC1832	214.58	18.1	378	11.86	<0,0001
fluoxetine,JU751 - M9,QG2873	146.92	18.1	378	8.12	<0,0001
fluoxetine,JU751 - M9,QX1430	149.08	15.67	378	9.51	<0,0001
fluoxetine,JU830 - fluoxetine,N2	-106.65	15.67	378	-6.81	1.72e-08
fluoxetine,JU830 - fluoxetine,NIC1786	-47.33	18.1	378	-2.62	0.695
fluoxetine,JU830 - fluoxetine,NIC1832	26.04	18.1	378	1.44	1
fluoxetine,JU830 - fluoxetine,QG2873	33.33	18.1	378	1.84	0.993
fluoxetine,JU830 - fluoxetine,QX1430	-78.5	15.67	378	-5.01	0.000334
fluoxetine,JU830 - M9,CB4856	217.67	18.1	378	12.03	<0,0001
fluoxetine,JU830 - M9,ED3005	178.67	18.1	378	9.87	<0,0001
fluoxetine,JU830 - M9,JU1200	190.29	18.1	378	10.52	<0,0001
fluoxetine,JU830 - M9,JU2587	189.92	18.1	378	10.5	<0,0001
fluoxetine,JU830 - M9,JU2593	216.29	18.1	378	11.95	<0,0001
fluoxetine,JU830 - M9,JU2829	99.29	18.1	378	5.49	3.12e-05
fluoxetine,JU830 - M9,JU3166	95.67	18.1	378	5.29	8.65e-05
fluoxetine,JU830 - M9,JU440	178.04	18.1	378	9.84	<0,0001
fluoxetine,JU830 - M9,JU751	212.96	18.1	378	11.77	<0,0001
fluoxetine,JU830 - M9,JU830	144.83	18.1	378	8	<0,0001
fluoxetine,JU830 - M9,N2	138.15	15.67	378	8.82	<0,0001
fluoxetine,JU830 - M9,NIC1786	233.33	18.1	378	12.89	<0,0001
fluoxetine,JU830 - M9,NIC1832	210.21	18.1	378	11.62	<0,0001
fluoxetine,JU830 - M9,QG2873	142.54	18.1	378	7.88	4.98e-12
fluoxetine,JU830 - M9,QX1430	144.71	15.67	378	9.23	<0,0001
fluoxetine,N2 - fluoxetine,NIC1786	59.31	15.67	378	3.78	0.0489
fluoxetine,N2 - fluoxetine,NIC1832	132.69	15.67	378	8.47	<0,0001
fluoxetine,N2 - fluoxetine,QG2873	139.98	15.67	378	8.93	<0,0001
fluoxetine,N2 - fluoxetine,QX1430	28.15	12.8	378	2.2	0.931
fluoxetine,N2 - M9,CB4856	324.31	15.67	378	20.7	<0,0001
fluoxetine,N2 - M9,ED3005	285.31	15.67	378	18.21	<0,0001
fluoxetine,N2 - M9,JU1200	296.94	15.67	378	18.95	<0,0001
fluoxetine,N2 - M9,JU2587	296.56	15.67	378	18.92	<0,0001
fluoxetine,N2 - M9,JU2593	322.94	15.67	378	20.61	<0,0001
fluoxetine,N2 - M9,JU2829	205.94	15.67	378	13.14	<0,0001
fluoxetine,N2 - M9,JU3166	202.31	15.67	378	12.91	<0,0001
fluoxetine,N2 - M9,JU440	284.69	15.67	378	18.17	<0,0001
fluoxetine,N2 - M9,JU751	319.6	15.67	378	20.39	<0,0001
fluoxetine,N2 - M9,JU830	251.48	15.67	378	16.05	<0,0001
fluoxetine,N2 - M9,N2	244.79	12.8	378	19.13	<0,0001
fluoxetine,N2 - M9,NIC1786	339.98	15.67	378	21.69	<0,0001
fluoxetine,N2 - M9,NIC1832	316.85	15.67	378	20.22	<0,0001
fluoxetine,N2 - M9,QG2873	249.19	15.67	378	15.9	<0,0001
fluoxetine,N2 - M9,QX1430	251.35	12.8	378	19.64	<0,0001
fluoxetine,NIC1786 - fluoxetine,NIC1832	73.37	18.1	378	4.05	0.0191
fluoxetine,NIC1786 - fluoxetine,QG2873	80.67	18.1	378	4.46	0.00391
fluoxetine,NIC1786 - fluoxetine,QX1430	-31.17	15.67	378	-1.99	0.979
fluoxetine,NIC1786 - M9,CB4856	265	18.1	378	14.64	<0,0001
fluoxetine,NIC1786 - M9,ED3005	226	18.1	378	12.49	<0,0001
fluoxetine,NIC1786 - M9,JU1200	237.63	18.1	378	13.13	<0,0001
fluoxetine,NIC1786 - M9,JU2587	237.25	18.1	378	13.11	<0,0001
fluoxetine,NIC1786 - M9,JU2593	263.63	18.1	378	14.57	<0,0001
fluoxetine,NIC1786 - M9,JU2829	146.63	18.1	378	8.1	<0,0001
fluoxetine,NIC1786 - M9,JU3166	143	18.1	378	7.9	2.51e-12
fluoxetine,NIC1786 - M9,JU440	225.38	18.1	378	12.45	<0,0001
fluoxetine,NIC1786 - M9,JU751	260.29	18.1	378	14.38	<0,0001
fluoxetine,NIC1786 - M9,JU830	192.17	18.1	378	10.62	<0,0001
fluoxetine,NIC1786 - M9,N2	185.48	15.67	378	11.84	<0,0001
fluoxetine,NIC1786 - M9,NIC1786	280.67	18.1	378	15.51	<0,0001
fluoxetine,NIC1786 - M9,NIC1832	257.54	18.1	378	14.23	<0,0001
fluoxetine,NIC1786 - M9,QG2873	189.88	18.1	378	10.49	<0,0001
fluoxetine,NIC1786 - M9,QX1430	192.04	15.67	378	12.25	<0,0001
fluoxetine,NIC1832 - fluoxetine,QG2873	7.29	18.1	378	0.4	1
fluoxetine,NIC1832 - fluoxetine,QX1430	-104.54	15.67	378	-6.67	3.91e-08
fluoxetine,NIC1832 - M9,CB4856	191.63	18.1	378	10.59	<0,0001
Fluoxetine,NIC1832 - M9,ED3005	152.63	18.1	378	8.43	<0,0001
Fluoxetine,NIC1832 - M9,JU1200	164.25	18.1	378	9.08	<0,0001
Fluoxetine,NIC1832 - M9,JU2587	163.88	18.1	378	9.06	<0,0001
Fluoxetine,NIC1832 - M9,JU2593	190.25	18.1	378	10.51	<0,0001
Fluoxetine,NIC1832 - M9,JU2829	73.25	18.1	378	4.05	0.0195
fluoxetine,NIC1832 - M9,JU3166	69.63	18.1	378	3.85	0.0396
fluoxetine,NIC1832 - M9,JU440	152	18.1	378	8.4	<0,0001
fluoxetine,NIC1832 - M9,JU751	186.92	18.1	378	10.33	<0,0001
fluoxetine,NIC1832 - M9,JU830	118.79	18.1	378	6.56	7.44e-08
fluoxetine,NIC1832 - M9,N2	112.1	15.67	378	7.15	1.9e-09
fluoxetine,NIC1832 - M9,NIC1786	207.29	18.1	378	11.46	<0,0001
fluoxetine,NIC1832 - M9,NIC1832	184.17	18.1	378	10.18	<0,0001
fluoxetine,NIC1832 - M9,QG2873	116.5	18.1	378	6.44	1.58e-07
fluoxetine,NIC1832 - M9,QX1430	118.67	15.67	378	7.57	1.13e-10
fluoxetine,QG2873 - fluoxetine,QX1430	-111.83	15.67	378	-7.14	2.13e-09
fluoxetine,QG2873 - M9,CB4856	184.33	18.1	378	10.19	<0,0001
fluoxetine,QG2873 - M9,ED3005	145.33	18.1	378	8.03	<0,0001
fluoxetine,QG2873 - M9,JU1200	156.96	18.1	378	8.67	<0,0001
fluoxetine,QG2873 - M9,JU2587	156.58	18.1	378	8.65	<0,0001
fluoxetine,QG2873 - M9,JU2593	182.96	18.1	378	10.11	<0,0001
fluoxetine,QG2873 - M9,JU2829	65.96	18.1	378	3.65	0.0765
fluoxetine,QG2873 - M9,JU3166	62.33	18.1	378	3.44	0.137
fluoxetine,QG2873 - M9,JU440	144.71	18.1	378	8	<0,0001
fluoxetine,QG2873 - M9,JU751	179.62	18.1	378	9.93	<0,0001
fluoxetine,QG2873 - M9,JU830	111.5	18.1	378	6.16	7.9e-07
fluoxetine,QG2873 - M9,N2	104.81	15.67	378	6.69	3.52e-08
fluoxetine,QG2873 - M9,NIC1786	200	18.1	378	11.05	<0,0001
fluoxetine,QG2873 - M9,NIC1832	176.87	18.1	378	9.77	<0,0001
fluoxetine,QG2873 - M9,QG2873	109.21	18.1	378	6.04	1.62e-06
fluoxetine,QG2873 - M9,QX1430	111.37	15.67	378	7.11	2.57e-09
fluoxetine,QX1430 - M9,CB4856	296.17	15.67	378	18.9	<0,0001
fluoxetine,QX1430 - M9,ED3005	257.17	15.67	378	16.41	<0,0001
fluoxetine,QX1430 - M9,JU1200	268.79	15.67	378	17.15	<0,0001
fluoxetine,QX1430 - M9,JU2587	268.42	15.67	378	17.13	<0,0001
fluoxetine,QX1430 - M9,JU2593	294.79	15.67	378	18.81	<0,0001
fluoxetine,QX1430 - M9,JU2829	177.79	15.67	378	11.35	<0,0001
fluoxetine,QX1430 - M9,JU3166	174.17	15.67	378	11.11	<0,0001
fluoxetine,QX1430 - M9,JU440	256.54	15.67	378	16.37	<0,0001
fluoxetine,QX1430 - M9,JU751	291.46	15.67	378	18.6	<0,0001
fluoxetine,QX1430 - M9,JU830	223.33	15.67	378	14.25	<0,0001
fluoxetine,QX1430 - M9,N2	216.65	12.8	378	16.93	<0,0001
fluoxetine,QX1430 - M9,NIC1786	311.83	15.67	378	19.9	<0,0001
fluoxetine,QX1430 - M9,NIC1832	288.71	15.67	378	18.42	<0,0001
fluoxetine,QX1430 - M9,QG2873	221.04	15.67	378	14.11	<0,0001
fluoxetine,QX1430 - M9,QX1430	223.21	12.8	378	17.44	<0,0001
M9,CB4856 - M9,ED3005	-39	18.1	378	-2.16	0.945
M9,CB4856 - M9,JU1200	-27.38	18.1	378	-1.51	1
M9,CB4856 - M9,JU2587	-27.75	18.1	378	-1.53	1
M9,CB4856 - M9,JU2593	-1.37	18.1	378	-0.08	1
M9,CB4856 - M9,JU2829	-118.38	18.1	378	-6.54	8.54e-08
M9,CB4856 - M9,JU3166	-122	18.1	378	-6.74	2.53e-08
M9,CB4856 - M9,JU440	-39.62	18.1	378	-2.19	0.934
M9,CB4856 - M9,JU751	-4.71	18.1	378	-0.26	1
M9,CB4856 - M9,JU830	-72.83	18.1	378	-4.02	0.0213
M9,CB4856 - M9,N2	-79.52	15.67	378	-5.07	0.000245
M9,CB4856 - M9,NIC1786	15.67	18.1	378	0.87	1
M9,CB4856 - M9,NIC1832	-7.46	18.1	378	-0.41	1
M9,CB4856 - M9,QG2873	-75.12	18.1	378	-4.15	0.0133
M9,CB4856 - M9,QX1430	-72.96	15.67	378	-4.66	0.00168
M9,ED3005 - M9,JU1200	11.62	18.1	378	0.64	1
M9,ED3005 - M9,JU2587	11.25	18.1	378	0.62	1
M9,ED3005 - M9,JU2593	37.63	18.1	378	2.08	0.963
M9,ED3005 - M9,JU2829	-79.37	18.1	378	-4.39	0.00525
M9,ED3005 - M9,JU3166	-83	18.1	378	-4.59	0.00227
M9,ED3005 - M9,JU440	-0.62	18.1	378	-0.03	1
M9,ED3005 - M9,JU751	34.29	18.1	378	1.9	0.989
M9,ED3005 - M9,JU830	-33.83	18.1	378	-1.87	0.991
M9,ED3005 - M9,N2	-40.52	15.67	378	-2.59	0.717
M9,ED3005 - M9,NIC1786	54.67	18.1	378	3.02	0.374
M9,ED3005 - M9,NIC1832	31.54	18.1	378	1.74	0.997
M9,ED3005 - M9,QG2873	-36.12	18.1	378	-2	0.978
M9,ED3005 - M9,QX1430	-33.96	15.67	378	-2.17	0.941
M9,JU1200 - M9,JU2587	-0.37	18.1	378	-0.02	1
M9,JU1200 - M9,JU2593	26	18.1	378	1.44	1
M9,JU1200 - M9,JU2829	-91	18.1	378	-5.03	0.000304
M9,JU1200 - M9,JU3166	-94.62	18.1	378	-5.23	0.000115
M9,JU1200 - M9,JU440	-12.25	18.1	378	-0.68	1
M9,JU1200 - M9,JU751	22.67	18.1	378	1.25	1
M9,JU1200 - M9,JU830	-45.46	18.1	378	-2.51	0.77
M9,JU1200 - M9,N2	-52.15	15.67	378	-3.33	0.187
M9,JU1200 - M9,NIC1786	43.04	18.1	378	2.38	0.852
M9,JU1200 - M9,NIC1832	19.92	18.1	378	1.1	1
M9,JU1200 - M9,QG2873	-47.75	18.1	378	-2.64	0.677
M9,JU1200 - M9,QX1430	-45.58	15.67	378	-2.91	0.46
M9,JU2587 - M9,JU2593	26.38	18.1	378	1.46	1
M9,JU2587 - M9,JU2829	-90.63	18.1	378	-5.01	0.000336
M9,JU2587 - M9,JU3166	-94.25	18.1	378	-5.21	0.000128
M9,JU2587 - M9,JU440	-11.88	18.1	378	-0.66	1
M9,JU2587 - M9,JU751	23.04	18.1	378	1.27	1
M9,JU2587 - M9,JU830	-45.08	18.1	378	-2.49	0.784
M9,JU2587 - M9,N2	-51.77	15.67	378	-3.3	0.199
M9,JU2587 - M9,NIC1786	43.42	18.1	378	2.4	0.841
M9,JU2587 - M9,NIC1832	20.29	18.1	378	1.12	1
M9,JU2587 - M9,QG2873	-47.38	18.1	378	-2.62	0.693
M9,JU2587 - M9,QX1430	-45.21	15.67	378	-2.88	0.479
M9,JU2593 - M9,JU2829	-117	18.1	378	-6.47	1.34e-07
M9,JU2593 - M9,JU3166	-120.63	18.1	378	-6.67	4.03e-08
M9,JU2593 - M9,JU440	-38.25	18.1	378	-2.11	0.955
M9,JU2593 - M9,JU751	-3.33	18.1	378	-0.18	1
M9,JU2593 - M9,JU830	-71.46	18.1	378	-3.95	0.0279
M9,JU2593 - M9,N2	-78.15	15.67	378	-4.99	0.000372
M9,JU2593 - M9,NIC1786	17.04	18.1	378	0.94	1
M9,JU2593 - M9,NIC1832	-6.08	18.1	378	-0.34	1
M9,JU2593 - M9,QG2873	-73.75	18.1	378	-4.08	0.0177
M9,JU2593 - M9,QX1430	-71.58	15.67	378	-4.57	0.00246
M9,JU2829 - M9,JU3166	-3.62	18.1	378	-0.2	1
M9,JU2829 - M9,JU440	78.75	18.1	378	4.35	0.00605
M9,JU2829 - M9,JU751	113.67	18.1	378	6.28	3.97e-07
M9,JU2829 - M9,JU830	45.54	18.1	378	2.52	0.767
M9,JU2829 - M9,N2	38.85	15.67	378	2.48	0.792
M9,JU2829 - M9,NIC1786	134.04	18.1	378	7.41	3.57e-10
M9,JU2829 - M9,NIC1832	110.92	18.1	378	6.13	9.5e-07
M9,JU2829 - M9,QG2873	43.25	18.1	378	2.39	0.846
M9,JU2829 - M9,QX1430	45.42	15.67	378	2.9	0.468
M9,JU3166 - M9,JU440	82.38	18.1	378	4.55	0.00263
M9,JU3166 - M9,JU751	117.29	18.1	378	6.48	1.22e-07
M9,JU3166 - M9,JU830	49.17	18.1	378	2.72	0.615
M9,JU3166 - M9,N2	42.48	15.67	378	2.71	0.62
M9,JU3166 - M9,NIC1786	137.67	18.1	378	7.61	8.66e-11
M9,JU3166 - M9,NIC1832	114.54	18.1	378	6.33	2.99e-07
M9,JU3166 - M9,QG2873	46.88	18.1	378	2.59	0.714
M9,JU3166 - M9,QX1430	49.04	15.67	378	3.13	0.299
M9,JU440 - M9,JU751	34.92	18.1	378	1.93	0.986
M9,JU440 - M9,JU830	-33.21	18.1	378	-1.84	0.993
M9,JU440 - M9,N2	-39.9	15.67	378	-2.55	0.746
M9,JU440 - M9,NIC1786	55.29	18.1	378	3.06	0.349
M9,JU440 - M9,NIC1832	32.17	18.1	378	1.78	0.996
M9,JU440 - M9,QG2873	-35.5	18.1	378	-1.96	0.982
M9,JU440 - M9,QX1430	-33.33	15.67	378	-2.13	0.952
M9,JU751 - M9,JU830	-68.12	18.1	378	-3.76	0.0523
M9,JU751 - M9,N2	-74.81	15.67	378	-4.77	0.000993
M9,JU751 - M9,NIC1786	20.38	18.1	378	1.13	1
M9,JU751 - M9,NIC1832	-2.75	18.1	378	-0.15	1
M9,JU751 - M9,QG2873	-70.42	18.1	378	-3.89	0.0341
M9,JU751 - M9,QX1430	-68.25	15.67	378	-4.36	0.00597
M9,JU830 - M9,N2	-6.69	15.67	378	-0.43	1
M9,JU830 - M9,NIC1786	88.5	18.1	378	4.89	0.000582
M9,JU830 - M9,NIC1832	65.37	18.1	378	3.61	0.0844
M9,JU830 - M9,QG2873	-2.29	18.1	378	-0.13	1
M9,JU830 - M9,QX1430	-0.13	15.67	378	-0.01	1
M9,N2 - M9,NIC1786	95.19	15.67	378	6.07	1.3e-06
M9,N2 - M9,NIC1832	72.06	15.67	378	4.6	0.00215
M9,N2 - M9,QG2873	4.4	15.67	378	0.28	1
M9,N2 - M9,QX1430	6.56	12.8	378	0.51	1
M9,NIC1786 - M9,NIC1832	-23.13	18.1	378	-1.28	1
M9,NIC1786 - M9,QG2873	-90.79	18.1	378	-5.02	0.000322
M9,NIC1786 - M9,QX1430	-88.63	15.67	378	-5.66	1.29e-05
M9,NIC1832 - M9,QG2873	-67.67	18.1	378	-3.74	0.0567
M9,NIC1832 - M9,QX1430	-65.5	15.67	378	-4.18	0.0119
M9,QG2873 - M9,QX1430	2.17	15.67	378	0.14	1
