# Supplementary material for: Natural variation in the Caenorhabditis elegans egg-laying circuit modulates an intergenerational fitness trade-off
Source: eLife. 2024 Apr 2;12:RP88253. doi: 10.7554/eLife.88253 (PMC10987095; doi:10.7554/eLife.88253)
Supplement: Figure 8—source data 1. [file elife-88253-fig8-data1.xlsx]

## Sheet: Figure 8B
Class	Strain	State	Background	Treatment	Eggs laid per worm
Class II	N2	WT	N2	M9	3.66667
Class II	N2	WT	N2	M9	2
Class II	N2	WT	N2	M9	1
Class II	N2	WT	N2	M9	2.25
Class II	N2	WT	N2	M9	0.5
Class II	N2	WT	N2	M9	1.66667
Class II	MCP355	mod5	N2	M9	3.42997
Class II	MCP355	mod5	N2	M9	2.69498
Class II	MCP355	mod5	N2	M9	3.91997
Class II	MCP355	mod5	N2	M9	5.55329
Class II	MCP355	mod5	N2	M9	1.95998
Class II	MCP355	mod5	N2	M9	4.24663
Class III A	ED3005	WT	ED3005	M9	0
Class III A	ED3005	WT	ED3005	M9	0
Class III A	ED3005	WT	ED3005	M9	2.24179
Class III A	ED3005	WT	ED3005	M9	0.960769
Class III A	ED3005	WT	ED3005	M9	0.320256
Class III A	ED3005	WT	ED3005	M9	0
Class III A	MCP374	mod5	ED3005	M9	3.76914
Class III A	MCP374	mod5	ED3005	M9	5.18257
Class III A	MCP374	mod5	ED3005	M9	1.41343
Class III A	MCP374	mod5	ED3005	M9	2.51276
Class III A	MCP374	mod5	ED3005	M9	0.62819
Class III A	MCP374	mod5	ED3005	M9	1.649
Class III A	JU2829	WT	JU2829	M9	2.15716
Class III A	JU2829	WT	JU2829	M9	1.23267
Class III A	JU2829	WT	JU2829	M9	3.23575
Class III A	JU2829	WT	JU2829	M9	0
Class III A	JU2829	WT	JU2829	M9	1.23267
Class III A	JU2829	WT	JU2829	M9	1.23267
Class III A	MCP378	mod5	JU2829	M9	3.62949
Class III A	MCP378	mod5	JU2829	M9	3.93195
Class III A	MCP378	mod5	JU2829	M9	0.907372
Class III A	MCP378	mod5	JU2829	M9	5.89792
Class III A	MCP378	mod5	JU2829	M9	4.53686
Class III A	MCP378	mod5	JU2829	M9	1.81474
Class II	QX1430	WT	QX1430	M9	1.55902
Class II	QX1430	WT	QX1430	M9	3.56347
Class II	QX1430	WT	QX1430	M9	3.56347
Class II	QX1430	WT	QX1430	M9	0.593912
Class II	QX1430	WT	QX1430	M9	4.15739
Class II	QX1430	WT	QX1430	M9	1.78174
Class II	MCP376	mod5	QX1430	M9	5.24973
Class II	MCP376	mod5	QX1430	M9	3.93729
Class II	MCP376	mod5	QX1430	M9	1.31243
Class II	MCP376	mod5	QX1430	M9	3.06234
Class II	MCP376	mod5	QX1430	M9	3.93729
Class II	MCP376	mod5	QX1430	M9	3.06234
Class II	N2	WT	N2	M9	2
Class II	N2	WT	N2	M9	3
Class II	N2	WT	N2	M9	6
Class II	N2	WT	N2	M9	0.666667
Class II	N2	WT	N2	M9	1.5
Class II	N2	WT	N2	M9	1
Class II	MCP355	mod5	N2	M9	3.67497
Class II	MCP355	mod5	N2	M9	2.44998
Class II	MCP355	mod5	N2	M9	3.91997
Class II	MCP355	mod5	N2	M9	2.44998
Class II	MCP355	mod5	N2	M9	5.87995
Class II	MCP355	mod5	N2	M9	3.26664
Class III A	ED3005	WT	ED3005	M9	1.44115
Class III A	ED3005	WT	ED3005	M9	1.44115
Class III A	ED3005	WT	ED3005	M9	0.960769
Class III A	ED3005	WT	ED3005	M9	1.44115
Class III A	MCP374	mod5	ED3005	M9	0
Class III A	MCP374	mod5	ED3005	M9	3.298
Class III A	MCP374	mod5	ED3005	M9	2.51276
Class III A	MCP374	mod5	ED3005	M9	1.88457
Class III A	MCP374	mod5	ED3005	M9	0
Class III A	MCP374	mod5	ED3005	M9	2.82686
Class III A	JU2829	WT	JU2829	M9	2.7735
Class III A	JU2829	WT	JU2829	M9	0.924499
Class III A	JU2829	WT	JU2829	M9	0.616333
Class III A	JU2829	WT	JU2829	M9	2.08012
Class III A	JU2829	WT	JU2829	M9	2.7735
Class III A	JU2829	WT	JU2829	M9	0.5547
Class III A	MCP378	mod5	JU2829	M9	4.08318
Class III A	MCP378	mod5	JU2829	M9	7.25898
Class III A	MCP378	mod5	JU2829	M9	6.65406
Class III A	MCP378	mod5	JU2829	M9	3.1758
Class III A	MCP378	mod5	JU2829	M9	7.25898
Class III A	MCP378	mod5	JU2829	M9	6.57845
Class II	QX1430	WT	QX1430	M9	4.89978
Class II	QX1430	WT	QX1430	M9	7.57238
Class II	QX1430	WT	QX1430	M9	3.11804
Class II	QX1430	WT	QX1430	M9	1.78174
Class II	QX1430	WT	QX1430	M9	2.67261
Class II	QX1430	WT	QX1430	M9	6.82999
Class II	MCP376	mod5	QX1430	M9	8.74954
Class II	MCP376	mod5	QX1430	M9	3.06234
Class II	MCP376	mod5	QX1430	M9	5.24973
Class II	MCP376	mod5	QX1430	M9	8.31207
Class II	MCP376	mod5	QX1430	M9	10.062
Class II	MCP376	mod5	QX1430	M9	9.18702
Class III A	JU830	WT	JU830	M9	0
Class III A	JU830	WT	JU830	M9	0
Class III A	JU830	WT	JU830	M9	0
Class III A	JU830	WT	JU830	M9	0
Class III A	JU830	WT	JU830	M9	0
Class III A	JU830	WT	JU830	M9	0
Class III A	MCP369	mod5	JU830	M9	2.44998
Class III A	MCP369	mod5	JU830	M9	1.63332
Class III A	MCP369	mod5	JU830	M9	0
Class III A	MCP369	mod5	JU830	M9	0.244998
Class III A	MCP369	mod5	JU830	M9	0
Class II	QX1430	WT	QX1430	M9	0
Class II	QX1430	WT	QX1430	M9	0
Class II	QX1430	WT	QX1430	M9	0
Class II	QX1430	WT	QX1430	M9	0
Class II	QX1430	WT	QX1430	M9	0
Class II	QX1430	WT	QX1430	M9	0
Class II	MCP376	mod5	QX1430	M9	4.08324
Class II	MCP376	mod5	QX1430	M9	5.65371
Class II	MCP376	mod5	QX1430	M9	0
Class II	MCP376	mod5	QX1430	M9	8.79466
Class II	MCP376	mod5	QX1430	M9	2.51276
Class II	MCP376	mod5	QX1430	M9	1.57048
Class III B	JU751	WT	JU751	M9	0
Class III B	JU751	WT	JU751	M9	2.37565
Class III B	JU751	WT	JU751	M9	0
Class III B	JU751	WT	JU751	M9	0.890869
Class III B	JU751	WT	JU751	M9	0.890869
Class III B	JU751	WT	JU751	M9	0
Class III B	MCP370	mod5	JU751	M9	3.93729
Class III B	MCP370	mod5	JU751	M9	2.91651
Class III B	MCP370	mod5	JU751	M9	5.24973
Class III B	MCP370	mod5	JU751	M9	1.96865
Class III B	MCP370	mod5	JU751	M9	1.45826
Class III B	MCP370	mod5	JU751	M9	1.45826
Class III A	JU830	WT	JU830	M9	0.5
Class III A	JU830	WT	JU830	M9	0
Class III A	JU830	WT	JU830	M9	0
Class III A	JU830	WT	JU830	M9	0
Class III A	MCP369	mod5	JU830	M9	0.326664
Class III A	MCP369	mod5	JU830	M9	0
Class III A	MCP369	mod5	JU830	M9	0
Class III A	MCP369	mod5	JU830	M9	0
Class III A	MCP369	mod5	JU830	M9	0
Class III A	MCP369	mod5	JU830	M9	0
Class II	QX1430	WT	QX1430	M9	0
Class II	QX1430	WT	QX1430	M9	0
Class II	QX1430	WT	QX1430	M9	0
Class II	QX1430	WT	QX1430	M9	0
Class II	QX1430	WT	QX1430	M9	0
Class II	QX1430	WT	QX1430	M9	0
Class II	MCP376	mod5	QX1430	M9	0.471143
Class II	MCP376	mod5	QX1430	M9	1.41343
Class II	MCP376	mod5	QX1430	M9	0
Class II	MCP376	mod5	QX1430	M9	2.35571
Class III B	JU751	WT	JU751	M9	1.78174
Class III B	JU751	WT	JU751	M9	1.18782
Class III B	JU751	WT	JU751	M9	0
Class III B	JU751	WT	JU751	M9	0
Class III B	JU751	WT	JU751	M9	0
Class III B	JU751	WT	JU751	M9	0.296956
Class III B	MCP370	mod5	JU751	M9	7.43711
Class III B	MCP370	mod5	JU751	M9	1.74991
Class III B	MCP370	mod5	JU751	M9	0.874954
Class III B	MCP370	mod5	JU751	M9	5.54138
Class III B	MCP370	mod5	JU751	M9	0
Class III A	JU830	WT	JU830	M9	0.666667
Class III A	JU830	WT	JU830	M9	0
Class III A	JU830	WT	JU830	M9	5
Class III A	JU830	WT	JU830	M9	4.66667
Class III A	JU830	WT	JU830	M9	3.66667
Class III A	JU830	WT	JU830	M9	0
Class III A	MCP369	mod5	JU830	M9	4.40996
Class III A	MCP369	mod5	JU830	M9	4.11597
Class III A	MCP369	mod5	JU830	M9	1.46999
Class III A	MCP369	mod5	JU830	M9	0
Class III A	MCP369	mod5	JU830	M9	0
Class III A	MCP369	mod5	JU830	M9	0.489996
Class II	QX1430	WT	QX1430	M9	1.92154
Class II	QX1430	WT	QX1430	M9	6.245
Class II	QX1430	WT	QX1430	M9	3.84307
Class II	QX1430	WT	QX1430	M9	6.245
Class II	QX1430	WT	QX1430	M9	2.24179
Class II	QX1430	WT	QX1430	M9	6.40512
Class II	MCP376	mod5	QX1430	M9	8.00942
Class II	MCP376	mod5	QX1430	M9	9.42285
Class II	MCP376	mod5	QX1430	M9	8.48057
Class II	MCP376	mod5	QX1430	M9	9.73695
Class II	MCP376	mod5	QX1430	M9	3.45505
Class II	MCP376	mod5	QX1430	M9	11.3074
Class III B	JU751	WT	JU751	M9	10.0965
Class III B	JU751	WT	JU751	M9	2.22717
Class III B	JU751	WT	JU751	M9	5.34521
Class III B	JU751	WT	JU751	M9	5.93912
Class III B	JU751	WT	JU751	M9	5.34521
Class III B	JU751	WT	JU751	M9	4.00891
Class III B	MCP370	mod5	JU751	M9	4.37477
Class III B	MCP370	mod5	JU751	M9	5.24973
Class III B	MCP370	mod5	JU751	M9	6.12468
Class III B	MCP370	mod5	JU751	M9	6.7809
Class III B	MCP370	mod5	JU751	M9	4.15603
Class III B	MCP370	mod5	JU751	M9	4.81225
Class III A	JU830	WT	JU830	M9	0.333333
Class III A	JU830	WT	JU830	M9	5.66667
Class III A	JU830	WT	JU830	M9	3.5
Class III A	JU830	WT	JU830	M9	1.25
Class III A	JU830	WT	JU830	M9	0
Class III A	JU830	WT	JU830	M9	0.666667
Class III A	MCP369	mod5	JU830	M9	0
Class III A	MCP369	mod5	JU830	M9	0
Class III A	MCP369	mod5	JU830	M9	1.63332
Class III A	MCP369	mod5	JU830	M9	4.40996
Class III A	MCP369	mod5	JU830	M9	1.30666
Class III A	MCP369	mod5	JU830	M9	3.91997
Class II	QX1430	WT	QX1430	M9	0.640512
Class II	QX1430	WT	QX1430	M9	5.76461
Class II	QX1430	WT	QX1430	M9	4.80384
Class II	QX1430	WT	QX1430	M9	3.36269
Class II	QX1430	WT	QX1430	M9	0
Class II	QX1430	WT	QX1430	M9	1.68135
Class II	MCP376	mod5	QX1430	M9	10.6792
Class II	MCP376	mod5	QX1430	M9	9.89399
Class II	MCP376	mod5	QX1430	M9	8.79466
Class II	MCP376	mod5	QX1430	M9	10.051
Class II	MCP376	mod5	QX1430	M9	9.42285
Class II	MCP376	mod5	QX1430	M9	3.298
Class III B	JU751	WT	JU751	M9	3.56347
Class III B	JU751	WT	JU751	M9	0.890869
Class III B	JU751	WT	JU751	M9	1.48478
Class III B	JU751	WT	JU751	M9	3.56347
Class III B	JU751	WT	JU751	M9	2.67261
Class III B	JU751	WT	JU751	M9	1.3363
Class III B	MCP370	mod5	JU751	M9	3.67481
Class III B	MCP370	mod5	JU751	M9	0.583303
Class III B	MCP370	mod5	JU751	M9	2.8436
Class III B	MCP370	mod5	JU751	M9	6.12468
Class III B	MCP370	mod5	JU751	M9	3.20817
Class II	N2	WT	N2	M9	5.5
Class II	N2	WT	N2	M9	3.2
Class II	N2	WT	N2	M9	1.33333
Class II	N2	WT	N2	M9	4.5
Class II	N2	WT	N2	M9	7.33333
Class II	N2	WT	N2	M9	4
Class II	N2	WT	N2	M9	3
Class II	N2	WT	N2	M9	5.33333
Class II	N2	WT	N2	M9	1.5
Class II	N2	WT	N2	M9	5.66667
Class II	N2	WT	N2	M9	4.2
Class II	N2	WT	N2	M9	5
Class II	MCP355	mod5	N2	M9	3.91997
Class II	MCP355	mod5	N2	M9	1.95998
Class II	MCP355	mod5	N2	M9	6.12495
Class II	MCP355	mod5	N2	M9	5.22662
Class II	MCP355	mod5	N2	M9	1.95998
Class II	MCP355	mod5	N2	M9	3.5933
Class II	MCP355	mod5	N2	M9	2.93998
Class II	MCP355	mod5	N2	M9	2.77664
Class II	MCP355	mod5	N2	M9	2.61331
Class II	MCP355	mod5	N2	M9	7.18661
Class II	MCP355	mod5	N2	M9	8.49326
Class II	MCP355	mod5	N2	M9	5.63495
Class II	CB4856	WT	CB4856	M9	0
Class II	CB4856	WT	CB4856	M9	0.320256
Class II	CB4856	WT	CB4856	M9	0
Class II	CB4856	WT	CB4856	M9	1.28102
Class II	CB4856	WT	CB4856	M9	0.240192
Class II	CB4856	WT	CB4856	M9	0.320256
Class II	CB4856	WT	CB4856	M9	0
Class II	CB4856	WT	CB4856	M9	0
Class II	CB4856	WT	CB4856	M9	0
Class II	CB4856	WT	CB4856	M9	0
Class II	CB4856	WT	CB4856	M9	0
Class II	CB4856	WT	CB4856	M9	0
Class II	MCP387	mod5	CB4856	M9	3.14095
Class II	MCP387	mod5	CB4856	M9	1.50766
Class II	MCP387	mod5	CB4856	M9	4.39733
Class II	MCP387	mod5	CB4856	M9	2.82686
Class II	MCP387	mod5	CB4856	M9	3.76914
Class II	MCP387	mod5	CB4856	M9	0.942285
Class II	MCP387	mod5	CB4856	M9	3.76914
Class II	MCP387	mod5	CB4856	M9	2.59128
Class II	MCP387	mod5	CB4856	M9	1.25638
Class II	MCP387	mod5	CB4856	M9	1.57048
Class II	MCP387	mod5	CB4856	M9	2.19867
Class II	MCP387	mod5	CB4856	M9	3.76914
Class II	JU1200	WT	JU1200	M9	3.00462
Class II	JU1200	WT	JU1200	M9	0.924499
Class II	JU1200	WT	JU1200	M9	3.08166
Class II	JU1200	WT	JU1200	M9	2.15716
Class II	JU1200	WT	JU1200	M9	2.46533
Class II	JU1200	WT	JU1200	M9	1.54083
Class II	JU1200	WT	JU1200	M9	0.924499
Class II	JU1200	WT	JU1200	M9	2.7735
Class II	JU1200	WT	JU1200	M9	3.08166
Class II	JU1200	WT	JU1200	M9	4.16025
Class II	JU1200	WT	JU1200	M9	0.616333
Class II	JU1200	WT	JU1200	M9	2.4037
Class II	MCP381	mod5	JU1200	M9	5.89792
Class II	MCP381	mod5	JU1200	M9	6.35161
Class II	MCP381	mod5	JU1200	M9	4.53686
Class II	MCP381	mod5	JU1200	M9	6.12476
Class II	MCP381	mod5	JU1200	M9	7.03214
Class II	MCP381	mod5	JU1200	M9	6.65406
Class II	MCP381	mod5	JU1200	M9	3.93195
Class II	MCP381	mod5	JU1200	M9	5.44423
Class II	MCP381	mod5	JU1200	M9	7.25898
Class II	MCP381	mod5	JU1200	M9	6.80529
Class II	MCP381	mod5	JU1200	M9	7.77748
Class II	MCP381	mod5	JU1200	M9	3.85633
Class II	N2	WT	N2	M9	3.8
Class II	N2	WT	N2	M9	0
Class II	N2	WT	N2	M9	5.5
Class II	N2	WT	N2	M9	5
Class II	N2	WT	N2	M9	6
Class II	N2	WT	N2	M9	4.25
Class II	N2	WT	N2	M9	6.8
Class II	N2	WT	N2	M9	5.6
Class II	N2	WT	N2	M9	1.75
Class II	N2	WT	N2	M9	4.5
Class II	N2	WT	N2	M9	7.83333
Class II	N2	WT	N2	M9	4.33333
Class II	MCP355	mod5	N2	M9	4.40996
Class II	MCP355	mod5	N2	M9	3.67497
Class II	MCP355	mod5	N2	M9	11.4332
Class II	MCP355	mod5	N2	M9	6.27195
Class II	MCP355	mod5	N2	M9	7.34994
Class II	MCP355	mod5	N2	M9	6.36995
Class II	MCP355	mod5	N2	M9	6.36995
Class II	MCP355	mod5	N2	M9	6.36995
Class II	MCP355	mod5	N2	M9	9.30992
Class II	MCP355	mod5	N2	M9	6.12495
Class II	MCP355	mod5	N2	M9	8.32993
Class II	MCP355	mod5	N2	M9	8.81993
Class II	CB4856	WT	CB4856	M9	0.240192
Class II	CB4856	WT	CB4856	M9	0.288231
Class II	CB4856	WT	CB4856	M9	0.576461
Class II	CB4856	WT	CB4856	M9	0.480384
Class II	CB4856	WT	CB4856	M9	0.960769
Class II	CB4856	WT	CB4856	M9	0.480384
Class II	CB4856	WT	CB4856	M9	0
Class II	CB4856	WT	CB4856	M9	0
Class II	CB4856	WT	CB4856	M9	0
Class II	CB4856	WT	CB4856	M9	0.960769
Class II	CB4856	WT	CB4856	M9	0
Class II	CB4856	WT	CB4856	M9	0
Class II	MCP387	mod5	CB4856	M9	4.89988
Class II	MCP387	mod5	CB4856	M9	2.51276
Class II	MCP387	mod5	CB4856	M9	2.35571
Class II	MCP387	mod5	CB4856	M9	2.96147
Class II	MCP387	mod5	CB4856	M9	2.51276
Class II	MCP387	mod5	CB4856	M9	3.53357
Class II	MCP387	mod5	CB4856	M9	5.33962
Class II	MCP387	mod5	CB4856	M9	3.76914
Class II	MCP387	mod5	CB4856	M9	3.45505
Class II	MCP387	mod5	CB4856	M9	1.57048
Class II	MCP387	mod5	CB4856	M9	3.23069
Class II	MCP387	mod5	CB4856	M9	4.39733
Class II	JU1200	WT	JU1200	M9	1.54083
Class II	JU1200	WT	JU1200	M9	0.924499
Class II	JU1200	WT	JU1200	M9	4.16025
Class II	JU1200	WT	JU1200	M9	1.23267
Class II	JU1200	WT	JU1200	M9	0.231125
Class II	JU1200	WT	JU1200	M9	1.38675
Class II	JU1200	WT	JU1200	M9	1.4792
Class II	JU1200	WT	JU1200	M9	0.924499
Class II	JU1200	WT	JU1200	M9	6.93374
Class II	JU1200	WT	JU1200	M9	0
Class II	JU1200	WT	JU1200	M9	0.46225
Class II	JU1200	WT	JU1200	M9	0.924499
Class II	MCP381	mod5	JU1200	M9	4.53686
Class II	MCP381	mod5	JU1200	M9	3.62949
Class II	MCP381	mod5	JU1200	M9	5.44423
Class II	MCP381	mod5	JU1200	M9	6.04915
Class II	MCP381	mod5	JU1200	M9	5.44423
Class II	MCP381	mod5	JU1200	M9	8.39319
Class II	MCP381	mod5	JU1200	M9	5.44423
Class II	MCP381	mod5	JU1200	M9	4.31002
Class II	MCP381	mod5	JU1200	M9	5.14178
Class II	MCP381	mod5	JU1200	M9	7.25898
Class II	MCP381	mod5	JU1200	M9	3.26654
Class II	MCP381	mod5	JU1200	M9	7.8034
Class II	N2	WT	N2	M9	2.66667
Class II	N2	WT	N2	M9	3
Class II	N2	WT	N2	M9	2
Class II	N2	WT	N2	M9	1.33333
Class II	N2	WT	N2	M9	0.666667
Class II	N2	WT	N2	M9	1.66667
Class II	MCP355	mod5	N2	M9	5.22662
Class II	MCP355	mod5	N2	M9	4.40996
Class II	MCP355	mod5	N2	M9	6.53328
Class II	MCP355	mod5	N2	M9	8.81993
Class II	MCP355	mod5	N2	M9	4.89996
Class II	QX1430	WT	QX1430	M9	0.480384
Class II	QX1430	WT	QX1430	M9	0
Class II	QX1430	WT	QX1430	M9	0.320256
Class II	QX1430	WT	QX1430	M9	1.60128
Class II	QX1430	WT	QX1430	M9	1.60128
Class II	QX1430	WT	QX1430	M9	0
Class II	MCP376	mod5	QX1430	M9	1.88457
Class II	MCP376	mod5	QX1430	M9	0.942285
Class II	MCP376	mod5	QX1430	M9	0.942285
Class II	MCP376	mod5	QX1430	M9	4.39733
Class II	MCP376	mod5	QX1430	M9	3.45505
Class II	MCP376	mod5	QX1430	M9	2.19867
Class I	JU3166	WT	JU3166	M9	1.23267
Class I	JU3166	WT	JU3166	M9	0.616333
Class I	JU3166	WT	JU3166	M9	0.616333
Class I	JU3166	WT	JU3166	M9	0.616333
Class I	JU3166	WT	JU3166	M9	1.849
Class I	JU3166	WT	JU3166	M9	2.15716
Class I	MCP383	mod5	JU3166	M9	1.36106
Class I	MCP383	mod5	JU3166	M9	2.26843
Class I	MCP383	mod5	JU3166	M9	4.99055
Class I	MCP383	mod5	JU3166	M9	4.53686
Class I	MCP383	mod5	JU3166	M9	0.907372
Class I	MCP383	mod5	JU3166	M9	1.36106
Class I	QG2873	WT	QG2873	M9	3.11804
Class I	QG2873	WT	QG2873	M9	1.18782
Class I	QG2873	WT	QG2873	M9	0
Class I	QG2873	WT	QG2873	M9	0.890869
Class I	QG2873	WT	QG2873	M9	0
Class I	MCP380	mod5	QG2873	M9	1.16661
Class I	MCP380	mod5	QG2873	M9	1.96865
Class I	MCP380	mod5	QG2873	M9	1.74991
Class I	MCP380	mod5	QG2873	M9	1.16661
Class I	MCP380	mod5	QG2873	M9	2.09989
Class I	MCP380	mod5	QG2873	M9	0.583303
Class II	N2	WT	N2	M9	3.33333
Class II	N2	WT	N2	M9	3.5
Class II	N2	WT	N2	M9	6
Class II	N2	WT	N2	M9	6.66667
Class II	N2	WT	N2	M9	2.5
Class II	N2	WT	N2	M9	1.5
Class II	MCP355	mod5	N2	M9	4.89996
Class II	MCP355	mod5	N2	M9	4.40996
Class II	MCP355	mod5	N2	M9	8.32993
Class II	MCP355	mod5	N2	M9	8.32993
Class II	MCP355	mod5	N2	M9	5.87995
Class II	MCP355	mod5	N2	M9	6.61494
Class II	QX1430	WT	QX1430	M9	3.52282
Class II	QX1430	WT	QX1430	M9	2.40192
Class II	QX1430	WT	QX1430	M9	0
Class II	QX1430	WT	QX1430	M9	0
Class II	QX1430	WT	QX1430	M9	1.60128
Class II	MCP376	mod5	QX1430	M9	0
Class II	MCP376	mod5	QX1430	M9	0.942285
Class II	MCP376	mod5	QX1430	M9	3.298
Class II	MCP376	mod5	QX1430	M9	2.82686
Class II	MCP376	mod5	QX1430	M9	4.71143
Class II	MCP376	mod5	QX1430	M9	5.96781
Class I	JU3166	WT	JU3166	M9	2.7735
Class I	JU3166	WT	JU3166	M9	2.15716
Class I	JU3166	WT	JU3166	M9	1.05657
Class I	JU3166	WT	JU3166	M9	5.547
Class I	JU3166	WT	JU3166	M9	0.924499
Class I	JU3166	WT	JU3166	M9	1.6641
Class I	MCP383	mod5	JU3166	M9	4.76371
Class I	MCP383	mod5	JU3166	M9	3.93195
Class I	MCP383	mod5	JU3166	M9	5.21739
Class I	MCP383	mod5	JU3166	M9	1.81474
Class I	MCP383	mod5	JU3166	M9	5.44423
Class I	MCP383	mod5	JU3166	M9	3.62949
Class I	QG2873	WT	QG2873	M9	3.20713
Class I	QG2873	WT	QG2873	M9	2.96956
Class I	QG2873	WT	QG2873	M9	0.296956
Class I	QG2873	WT	QG2873	M9	0.890869
Class I	QG2873	WT	QG2873	M9	2.22717
Class I	QG2873	WT	QG2873	M9	2.31626
Class I	MCP380	mod5	QG2873	M9	1.74991
Class I	MCP380	mod5	QG2873	M9	4.37477
Class I	MCP380	mod5	QG2873	M9	2.43043
Class I	MCP380	mod5	QG2873	M9	2.87485
Class I	MCP380	mod5	QG2873	M9	3.35399
Class I	MCP380	mod5	QG2873	M9	1.74991
Class II	N2	WT	N2	M9	3.66667
Class II	N2	WT	N2	M9	3
Class II	N2	WT	N2	M9	3.66667
Class II	N2	WT	N2	M9	2.5
Class II	N2	WT	N2	M9	0.666667
Class II	N2	WT	N2	M9	1.5
Class II	MCP355	mod5	N2	M9	3.26664
Class II	MCP355	mod5	N2	M9	2.93998
Class II	MCP355	mod5	N2	M9	4.89996
Class II	MCP355	mod5	N2	M9	2.93998
Class II	MCP355	mod5	N2	M9	3.26664
Class II	QX1430	WT	QX1430	M9	0
Class II	QX1430	WT	QX1430	M9	1.28102
Class II	QX1430	WT	QX1430	M9	2.24179
Class II	QX1430	WT	QX1430	M9	0.960769
Class II	QX1430	WT	QX1430	M9	0.480384
Class II	QX1430	WT	QX1430	M9	0
Class II	MCP376	mod5	QX1430	M9	5.65371
Class II	MCP376	mod5	QX1430	M9	1.88457
Class II	MCP376	mod5	QX1430	M9	6.12485
Class II	MCP376	mod5	QX1430	M9	3.76914
Class II	MCP376	mod5	QX1430	M9	3.76914
Class I	JU3166	WT	JU3166	M9	1.15562
Class I	JU3166	WT	JU3166	M9	1.849
Class I	JU3166	WT	JU3166	M9	2.15716
Class I	JU3166	WT	JU3166	M9	1.849
Class I	JU3166	WT	JU3166	M9	0.616333
Class I	JU3166	WT	JU3166	M9	2.46533
Class I	MCP383	mod5	JU3166	M9	3.40265
Class I	MCP383	mod5	JU3166	M9	4.71834
Class I	MCP383	mod5	JU3166	M9	2.1172
Class I	MCP383	mod5	JU3166	M9	5.44423
Class I	MCP383	mod5	JU3166	M9	3.32703
Class I	MCP383	mod5	JU3166	M9	3.93195
Class I	QG2873	WT	QG2873	M9	1.48478
Class I	QG2873	WT	QG2873	M9	2.07869
Class I	QG2873	WT	QG2873	M9	1.48478
Class I	QG2873	WT	QG2873	M9	0.668151
Class I	QG2873	WT	QG2873	M9	0.668151
Class I	QG2873	WT	QG2873	M9	1.78174
Class I	MCP380	mod5	QG2873	M9	0.583303
Class I	MCP380	mod5	QG2873	M9	1.45826
Class I	MCP380	mod5	QG2873	M9	0.583303
Class I	MCP380	mod5	QG2873	M9	3.06234
Class I	MCP380	mod5	QG2873	M9	4.37477
Class I	MCP380	mod5	QG2873	M9	3.49982
Class II	N2	WT	N2	M9	6.33333
Class II	N2	WT	N2	M9	3.33333
Class II	N2	WT	N2	M9	4
Class II	N2	WT	N2	M9	5.25
Class II	N2	WT	N2	M9	4.66667
Class II	N2	WT	N2	M9	4.66667
Class II	MCP355	mod5	N2	M9	7.34994
Class II	MCP355	mod5	N2	M9	7.83993
Class II	MCP355	mod5	N2	M9	9.79992
Class II	MCP355	mod5	N2	M9	5.14496
Class II	MCP355	mod5	N2	M9	4.5733
Class II	MCP355	mod5	N2	M9	5.55329
Class II	QX1430	WT	QX1430	M9	1.28102
Class II	QX1430	WT	QX1430	M9	1.92154
Class II	QX1430	WT	QX1430	M9	0.960769
Class II	QX1430	WT	QX1430	M9	1.28102
Class II	QX1430	WT	QX1430	M9	0.640512
Class II	QX1430	WT	QX1430	M9	0.640512
Class II	MCP376	mod5	QX1430	M9	1.25638
Class II	MCP376	mod5	QX1430	M9	8.48057
Class II	MCP376	mod5	QX1430	M9	4.24028
Class II	MCP376	mod5	QX1430	M9	5.33962
Class II	MCP376	mod5	QX1430	M9	4.39733
Class II	MCP376	mod5	QX1430	M9	3.298
Class I	JU3166	WT	JU3166	M9	1.849
Class I	JU3166	WT	JU3166	M9	4.6225
Class I	JU3166	WT	JU3166	M9	4.31433
Class I	JU3166	WT	JU3166	M9	1.849
Class I	JU3166	WT	JU3166	M9	2.54237
Class I	JU3166	WT	JU3166	M9	3.08166
Class I	MCP383	mod5	JU3166	M9	6.35161
Class I	MCP383	mod5	JU3166	M9	0.907372
Class I	MCP383	mod5	JU3166	M9	6.80529
Class I	MCP383	mod5	JU3166	M9	2.26843
Class I	MCP383	mod5	JU3166	M9	4.2344
Class I	MCP383	mod5	JU3166	M9	3.62949
Class I	QG2873	WT	QG2873	M9	3.56347
Class I	QG2873	WT	QG2873	M9	2.44989
Class I	QG2873	WT	QG2873	M9	1.18782
Class I	QG2873	WT	QG2873	M9	1.78174
Class I	QG2873	WT	QG2873	M9	0.445434
Class I	QG2873	WT	QG2873	M9	1.78174
Class I	MCP380	mod5	QG2873	M9	2.18739
Class I	MCP380	mod5	QG2873	M9	5.42472
Class I	MCP380	mod5	QG2873	M9	3.82793
Class I	MCP380	mod5	QG2873	M9	1.31243
Class I	MCP380	mod5	QG2873	M9	2.04156
Class I	MCP380	mod5	QG2873	M9	5.6872
Class III A	ED3005	WT	ED3005	M9	5
Class III A	ED3005	WT	ED3005	M9	3.33333
Class III A	ED3005	WT	ED3005	M9	0
Class III A	ED3005	WT	ED3005	M9	1
Class III A	ED3005	WT	ED3005	M9	0
Class III A	ED3005	WT	ED3005	M9	2.66667
Class III A	MCP374	mod5	ED3005	M9	6.85994
Class III A	MCP374	mod5	ED3005	M9	4.89996
Class III A	MCP374	mod5	ED3005	M9	5.87995
Class III A	MCP374	mod5	ED3005	M9	1.95998
Class III A	MCP374	mod5	ED3005	M9	12.7399
Class III A	MCP374	mod5	ED3005	M9	2.61331
Class III A	JU2829	WT	JU2829	M9	4.80384
Class III A	JU2829	WT	JU2829	M9	6.245
Class III A	JU2829	WT	JU2829	M9	3.60288
Class III A	JU2829	WT	JU2829	M9	0.960769
Class III A	JU2829	WT	JU2829	M9	4.80384
Class III A	JU2829	WT	JU2829	M9	4.32346
Class III A	MCP378	mod5	JU2829	M9	13.192
Class III A	MCP378	mod5	JU2829	M9	10.6792
Class III A	MCP378	mod5	JU2829	M9	4.71143
Class III A	MCP378	mod5	JU2829	M9	4.947
Class III A	MCP378	mod5	JU2829	M9	9.65842
Class III A	MCP378	mod5	JU2829	M9	8.00942
Class III A	JU830	WT	JU830	M9	0.46225
Class III A	JU830	WT	JU830	M9	2.7735
Class III A	JU830	WT	JU830	M9	7.70416
Class III A	JU830	WT	JU830	M9	2.7735
Class III A	JU830	WT	JU830	M9	1.849
Class III A	JU830	WT	JU830	M9	0.46225
Class III A	MCP369	mod5	JU830	M9	8.16635
Class III A	MCP369	mod5	JU830	M9	6.80529
Class III A	MCP369	mod5	JU830	M9	6.95652
Class III A	MCP369	mod5	JU830	M9	4.53686
Class III A	MCP369	mod5	JU830	M9	5.14178
Class III A	MCP369	mod5	JU830	M9	1.36106
Class III A	ED3005	WT	ED3005	M9	0.5
Class III A	ED3005	WT	ED3005	M9	0
Class III A	ED3005	WT	ED3005	M9	4.66667
Class III A	ED3005	WT	ED3005	M9	1.66667
Class III A	ED3005	WT	ED3005	M9	0.5
Class III A	ED3005	WT	ED3005	M9	0.5
Class III A	MCP374	mod5	ED3005	M9	8.32993
Class III A	MCP374	mod5	ED3005	M9	1.46999
Class III A	MCP374	mod5	ED3005	M9	9.47325
Class III A	MCP374	mod5	ED3005	M9	7.18661
Class III A	MCP374	mod5	ED3005	M9	5.22662
Class III A	MCP374	mod5	ED3005	M9	8.1666
Class III A	JU2829	WT	JU2829	M9	5.28423
Class III A	JU2829	WT	JU2829	M9	3.20256
Class III A	JU2829	WT	JU2829	M9	3.84307
Class III A	JU2829	WT	JU2829	M9	5.76461
Class III A	JU2829	WT	JU2829	M9	6.08487
Class III A	JU2829	WT	JU2829	M9	7.68615
Class III A	MCP378	mod5	JU2829	M9	11.3074
Class III A	MCP378	mod5	JU2829	M9	10.3651
Class III A	MCP378	mod5	JU2829	M9	15.0766
Class III A	MCP378	mod5	JU2829	M9	11.3074
Class III A	MCP378	mod5	JU2829	M9	6.12485
Class III A	MCP378	mod5	JU2829	M9	8.48057
Class III A	JU830	WT	JU830	M9	4.39137
Class III A	JU830	WT	JU830	M9	2.7735
Class III A	JU830	WT	JU830	M9	2.31125
Class III A	JU830	WT	JU830	M9	3.08166
Class III A	JU830	WT	JU830	M9	1.23267
Class III A	JU830	WT	JU830	M9	0.46225
Class III A	MCP369	mod5	JU830	M9	8.77127
Class III A	MCP369	mod5	JU830	M9	10.8885
Class III A	MCP369	mod5	JU830	M9	5.14178
Class III A	MCP369	mod5	JU830	M9	3.1758
Class III A	MCP369	mod5	JU830	M9	3.62949
Class III A	MCP369	mod5	JU830	M9	2.72212
Class III A	ED3005	WT	ED3005	M9	0
Class III A	ED3005	WT	ED3005	M9	3.33333
Class III A	ED3005	WT	ED3005	M9	4.25
Class III A	ED3005	WT	ED3005	M9	3
Class III A	ED3005	WT	ED3005	M9	0.75
Class III A	ED3005	WT	ED3005	M9	1.33333
Class III A	MCP374	mod5	ED3005	M9	4.40996
Class III A	MCP374	mod5	ED3005	M9	9.47325
Class III A	MCP374	mod5	ED3005	M9	9.14659
Class III A	MCP374	mod5	ED3005	M9	3.26664
Class III A	MCP374	mod5	ED3005	M9	7.51327
Class III A	MCP374	mod5	ED3005	M9	6.27195
Class III A	JU2829	WT	JU2829	M9	8.16653
Class III A	JU2829	WT	JU2829	M9	3.84307
Class III A	JU2829	WT	JU2829	M9	10.5685
Class III A	JU2829	WT	JU2829	M9	6.91753
Class III A	JU2829	WT	JU2829	M9	0.320256
Class III A	JU2829	WT	JU2829	M9	4.48359
Class III A	MCP378	mod5	JU2829	M9	15.5477
Class III A	MCP378	mod5	JU2829	M9	14.7625
Class III A	MCP378	mod5	JU2829	M9	11.6215
Class III A	MCP378	mod5	JU2829	M9	8.79466
Class III A	MCP378	mod5	JU2829	M9	5.02552
Class III A	MCP378	mod5	JU2829	M9	6.12485
Class III A	JU830	WT	JU830	M9	3.38983
Class III A	JU830	WT	JU830	M9	1.849
Class III A	JU830	WT	JU830	M9	2.7735
Class III A	JU830	WT	JU830	M9	5.547
Class III A	JU830	WT	JU830	M9	1.61787
Class III A	JU830	WT	JU830	M9	0.46225
Class III A	MCP369	mod5	JU830	M9	1.81474
Class III A	MCP369	mod5	JU830	M9	4.08318
Class III A	MCP369	mod5	JU830	M9	0.604915
Class III A	MCP369	mod5	JU830	M9	0.604915
Class III A	MCP369	mod5	JU830	M9	2.1172
Class III A	MCP369	mod5	JU830	M9	5.08129
Class III B	JU751	WT	JU751	M9	4.67706
Class III B	JU751	WT	JU751	M9	7.12695
Class III B	JU751	WT	JU751	M9	6.23608
Class III B	JU751	WT	JU751	M9	5.34521
Class III B	JU751	WT	JU751	M9	11.8782
Class III B	JU751	WT	JU751	M9	7.4239
Class III B	MCP370	mod5	JU751	M9	7.43711
Class III B	MCP370	mod5	JU751	M9	5.24973
Class III B	MCP370	mod5	JU751	M9	5.46847
Class III B	MCP370	mod5	JU751	M9	5.6872
Class III B	MCP370	mod5	JU751	M9	2.18739
Class III B	MCP370	mod5	JU751	M9	6.56216
Class III A	ED3005	WT	ED3005	M9	0.8
Class III A	ED3005	WT	ED3005	M9	6.5
Class III A	ED3005	WT	ED3005	M9	4
Class III A	ED3005	WT	ED3005	M9	1.66667
Class III A	ED3005	WT	ED3005	M9	1.75
Class III A	ED3005	WT	ED3005	M9	2.33333
Class III A	MCP374	mod5	ED3005	M9	1.95998
Class III A	MCP374	mod5	ED3005	M9	4.5733
Class III A	MCP374	mod5	ED3005	M9	5.22662
Class III A	MCP374	mod5	ED3005	M9	2.93998
Class III A	MCP374	mod5	ED3005	M9	3.91997
Class III A	MCP374	mod5	ED3005	M9	4.89996
Class III A	JU2829	WT	JU2829	M9	5.28423
Class III A	JU2829	WT	JU2829	M9	3.20256
Class III A	JU2829	WT	JU2829	M9	2.88231
Class III A	JU2829	WT	JU2829	M9	5.44436
Class III A	JU2829	WT	JU2829	M9	3.36269
Class III A	JU2829	WT	JU2829	M9	3.36269
Class III A	MCP378	mod5	JU2829	M9	8.00942
Class III A	MCP378	mod5	JU2829	M9	5.65371
Class III A	MCP378	mod5	JU2829	M9	14.1343
Class III A	MCP378	mod5	JU2829	M9	11.7786
Class III A	MCP378	mod5	JU2829	M9	5.65371
Class III A	MCP378	mod5	JU2829	M9	9.42285
Class III A	JU830	WT	JU830	M9	9.24499
Class III A	JU830	WT	JU830	M9	2.31125
Class III A	JU830	WT	JU830	M9	0.924499
Class III A	JU830	WT	JU830	M9	5.85516
Class III A	JU830	WT	JU830	M9	0
Class III A	JU830	WT	JU830	M9	1.849
Class III A	MCP369	mod5	JU830	M9	2.72212
Class III A	MCP369	mod5	JU830	M9	2.72212
Class III A	MCP369	mod5	JU830	M9	0.907372
Class III A	MCP369	mod5	JU830	M9	2.41966
Class III A	MCP369	mod5	JU830	M9	1.13422
Class III A	MCP369	mod5	JU830	M9	3.62949
Class III B	JU751	WT	JU751	M9	1.3363
Class III B	JU751	WT	JU751	M9	4.00891
Class III B	JU751	WT	JU751	M9	2.67261
Class III B	JU751	WT	JU751	M9	4.45434
Class III B	JU751	WT	JU751	M9	2.67261
Class III B	JU751	WT	JU751	M9	2.67261
Class III B	MCP370	mod5	JU751	M9	6.12468
Class III B	MCP370	mod5	JU751	M9	4.66642
Class III B	MCP370	mod5	JU751	M9	3.49982
Class III B	MCP370	mod5	JU751	M9	6.56216
Class III B	MCP370	mod5	JU751	M9	1.31243

## Sheet: Figure 8 - Supplement 1A
Class	Strain	State	Background	Treatment	Eggs laid per worm
Class II	N2	WT	N2	serotonin	10
Class II	N2	WT	N2	serotonin	10.75
Class II	N2	WT	N2	serotonin	8.5
Class II	N2	WT	N2	serotonin	13
Class II	N2	WT	N2	serotonin	11.3333
Class II	N2	WT	N2	serotonin	11
Class II	MCP355	mod5	N2	serotonin	7.51327
Class II	MCP355	mod5	N2	serotonin	9.30992
Class II	MCP355	mod5	N2	serotonin	14.6999
Class II	MCP355	mod5	N2	serotonin	9.30992
Class II	MCP355	mod5	N2	serotonin	7.34994
Class II	MCP355	mod5	N2	serotonin	6.20661
Class III A	ED3005	WT	ED3005	serotonin	15.8527
Class III A	ED3005	WT	ED3005	serotonin	16.6533
Class III A	ED3005	WT	ED3005	serotonin	12.0096
Class III A	ED3005	WT	ED3005	serotonin	12.49
Class III A	ED3005	WT	ED3005	serotonin	11.7694
Class III A	ED3005	WT	ED3005	serotonin	14.0913
Class III A	MCP374	mod5	ED3005	serotonin	23.5571
Class III A	MCP374	mod5	ED3005	serotonin	27.7974
Class III A	MCP374	mod5	ED3005	serotonin	17.2752
Class III A	MCP374	mod5	ED3005	serotonin	14.7625
Class III A	MCP374	mod5	ED3005	serotonin	22.9289
Class III A	MCP374	mod5	ED3005	serotonin	15.7833
Class III A	JU2829	WT	JU2829	serotonin	0
Class III A	JU2829	WT	JU2829	serotonin	0
Class III A	JU2829	WT	JU2829	serotonin	0
Class III A	JU2829	WT	JU2829	serotonin	0
Class III A	JU2829	WT	JU2829	serotonin	0.693374
Class III A	JU2829	WT	JU2829	serotonin	0
Class III A	MCP378	mod5	JU2829	serotonin	0
Class III A	MCP378	mod5	JU2829	serotonin	0
Class III A	MCP378	mod5	JU2829	serotonin	0.302457
Class III A	MCP378	mod5	JU2829	serotonin	0
Class III A	MCP378	mod5	JU2829	serotonin	0
Class III A	MCP378	mod5	JU2829	serotonin	0.604915
Class II	QX1430	WT	QX1430	serotonin	5.34521
Class II	QX1430	WT	QX1430	serotonin	9.20564
Class II	QX1430	WT	QX1430	serotonin	13.0661
Class II	QX1430	WT	QX1430	serotonin	12.0267
Class II	QX1430	WT	QX1430	serotonin	3.11804
Class II	QX1430	WT	QX1430	serotonin	12.4722
Class II	MCP376	mod5	QX1430	serotonin	6.12468
Class II	MCP376	mod5	QX1430	serotonin	9.6245
Class II	MCP376	mod5	QX1430	serotonin	10.7911
Class II	MCP376	mod5	QX1430	serotonin	7.87459
Class II	MCP376	mod5	QX1430	serotonin	10.2078
Class II	N2	WT	N2	serotonin	5.33333
Class II	N2	WT	N2	serotonin	8.33333
Class II	N2	WT	N2	serotonin	11.5
Class II	N2	WT	N2	serotonin	17
Class II	N2	WT	N2	serotonin	4
Class II	N2	WT	N2	serotonin	4.66667
Class II	MCP355	mod5	N2	serotonin	9.79992
Class II	MCP355	mod5	N2	serotonin	6.46795
Class II	MCP355	mod5	N2	serotonin	6.85994
Class II	MCP355	mod5	N2	serotonin	10.4532
Class II	MCP355	mod5	N2	serotonin	4.40996
Class II	MCP355	mod5	N2	serotonin	9.14659
Class III A	ED3005	WT	ED3005	serotonin	18.2546
Class III A	ED3005	WT	ED3005	serotonin	20.6565
Class III A	ED3005	WT	ED3005	serotonin	12.9704
Class III A	ED3005	WT	ED3005	serotonin	11.0488
Class III A	ED3005	WT	ED3005	serotonin	7.68615
Class III A	ED3005	WT	ED3005	serotonin	7.68615
Class III A	MCP374	mod5	ED3005	serotonin	18.3746
Class III A	MCP374	mod5	ED3005	serotonin	20.4162
Class III A	MCP374	mod5	ED3005	serotonin	22.1437
Class III A	MCP374	mod5	ED3005	serotonin	18.8457
Class III A	MCP374	mod5	ED3005	serotonin	20.0236
Class III A	MCP374	mod5	ED3005	serotonin	17.9034
Class III A	JU2829	WT	JU2829	serotonin	0
Class III A	JU2829	WT	JU2829	serotonin	0
Class III A	JU2829	WT	JU2829	serotonin	0
Class III A	JU2829	WT	JU2829	serotonin	0
Class III A	JU2829	WT	JU2829	serotonin	0
Class III A	JU2829	WT	JU2829	serotonin	0.231125
Class III A	MCP378	mod5	JU2829	serotonin	0
Class III A	MCP378	mod5	JU2829	serotonin	0.181474
Class III A	MCP378	mod5	JU2829	serotonin	0
Class III A	MCP378	mod5	JU2829	serotonin	0
Class III A	MCP378	mod5	JU2829	serotonin	0
Class III A	MCP378	mod5	JU2829	serotonin	0.302457
Class II	QX1430	WT	QX1430	serotonin	11.5813
Class II	QX1430	WT	QX1430	serotonin	6.90423
Class II	QX1430	WT	QX1430	serotonin	12.4722
Class II	QX1430	WT	QX1430	serotonin	12.4722
Class II	QX1430	WT	QX1430	serotonin	7.83964
Class II	QX1430	WT	QX1430	serotonin	5.34521
Class II	MCP376	mod5	QX1430	serotonin	9.18702
Class II	MCP376	mod5	QX1430	serotonin	6.47466
Class II	MCP376	mod5	QX1430	serotonin	5.24973
Class II	MCP376	mod5	QX1430	serotonin	10.062
Class II	MCP376	mod5	QX1430	serotonin	8.09333
Class II	MCP376	mod5	QX1430	serotonin	13.1243
Class III A	JU830	WT	JU830	serotonin	14.5
Class III A	JU830	WT	JU830	serotonin	16
Class III A	JU830	WT	JU830	serotonin	12
Class III A	JU830	WT	JU830	serotonin	11
Class III A	JU830	WT	JU830	serotonin	19.6667
Class III A	JU830	WT	JU830	serotonin	12.5
Class III A	MCP369	mod5	JU830	serotonin	8.49326
Class III A	MCP369	mod5	JU830	serotonin	16.9865
Class III A	MCP369	mod5	JU830	serotonin	13.7199
Class III A	MCP369	mod5	JU830	serotonin	13.7199
Class III A	MCP369	mod5	JU830	serotonin	11.1066
Class III A	MCP369	mod5	JU830	serotonin	12.7399
Class II	QX1430	WT	QX1430	serotonin	4.16333
Class II	QX1430	WT	QX1430	serotonin	9.84788
Class II	QX1430	WT	QX1430	serotonin	12.0096
Class II	QX1430	WT	QX1430	serotonin	6.40512
Class II	QX1430	WT	QX1430	serotonin	8.00641
Class II	QX1430	WT	QX1430	serotonin	6.48519
Class II	MCP376	mod5	QX1430	serotonin	12.8779
Class II	MCP376	mod5	QX1430	serotonin	5.02552
Class II	MCP376	mod5	QX1430	serotonin	9.42285
Class II	MCP376	mod5	QX1430	serotonin	11.9356
Class II	MCP376	mod5	QX1430	serotonin	7.06714
Class II	MCP376	mod5	QX1430	serotonin	9.73695
Class III B	JU751	WT	JU751	serotonin	4.15739
Class III B	JU751	WT	JU751	serotonin	0
Class III B	JU751	WT	JU751	serotonin	0.445434
Class III B	JU751	WT	JU751	serotonin	0.445434
Class III B	JU751	WT	JU751	serotonin	0.890869
Class III B	JU751	WT	JU751	serotonin	0.593912
Class III B	MCP370	mod5	JU751	serotonin	1.45826
Class III B	MCP370	mod5	JU751	serotonin	1.31243
Class III B	MCP370	mod5	JU751	serotonin	1.45826
Class III B	MCP370	mod5	JU751	serotonin	2.04156
Class III B	MCP370	mod5	JU751	serotonin	1.16661
Class III B	MCP370	mod5	JU751	serotonin	0.291651
Class III A	JU830	WT	JU830	serotonin	16.5
Class III A	JU830	WT	JU830	serotonin	16.5
Class III A	JU830	WT	JU830	serotonin	13
Class III A	JU830	WT	JU830	serotonin	14
Class III A	MCP369	mod5	JU830	serotonin	8.81993
Class III A	MCP369	mod5	JU830	serotonin	13.9649
Class III A	MCP369	mod5	JU830	serotonin	16.1699
Class III A	MCP369	mod5	JU830	serotonin	10.7799
Class III A	MCP369	mod5	JU830	serotonin	2.93998
Class II	QX1430	WT	QX1430	serotonin	9.60769
Class II	QX1430	WT	QX1430	serotonin	7.20576
Class II	QX1430	WT	QX1430	serotonin	12.1697
Class II	QX1430	WT	QX1430	serotonin	11.0488
Class II	QX1430	WT	QX1430	serotonin	10.0881
Class II	QX1430	WT	QX1430	serotonin	8.64692
Class II	MCP376	mod5	QX1430	serotonin	2.82686
Class II	MCP376	mod5	QX1430	serotonin	2.35571
Class II	MCP376	mod5	QX1430	serotonin	7.06714
Class II	MCP376	mod5	QX1430	serotonin	9.42285
Class II	MCP376	mod5	QX1430	serotonin	6.12485
Class II	MCP376	mod5	QX1430	serotonin	9.89399
Class III B	JU751	WT	JU751	serotonin	0
Class III B	JU751	WT	JU751	serotonin	2.67261
Class III B	JU751	WT	JU751	serotonin	0.445434
Class III B	JU751	WT	JU751	serotonin	0.445434
Class III B	JU751	WT	JU751	serotonin	2.37565
Class III B	MCP370	mod5	JU751	serotonin	1.74991
Class III B	MCP370	mod5	JU751	serotonin	3.20817
Class III B	MCP370	mod5	JU751	serotonin	0
Class III B	MCP370	mod5	JU751	serotonin	0.583303
Class III B	MCP370	mod5	JU751	serotonin	3.93729
Class III B	MCP370	mod5	JU751	serotonin	2.18739
Class III B	MCP370	mod5	JU751	serotonin	0.874954
Class III A	JU830	WT	JU830	serotonin	24
Class III A	JU830	WT	JU830	serotonin	17.25
Class III A	JU830	WT	JU830	serotonin	22.75
Class III A	JU830	WT	JU830	serotonin	35.3333
Class III A	JU830	WT	JU830	serotonin	21
Class III A	JU830	WT	JU830	serotonin	19.6667
Class III A	MCP369	mod5	JU830	serotonin	17.6399
Class III A	MCP369	mod5	JU830	serotonin	20.5798
Class III A	MCP369	mod5	JU830	serotonin	25.8065
Class III A	MCP369	mod5	JU830	serotonin	26.4598
Class III A	MCP369	mod5	JU830	serotonin	13.7199
Class III A	MCP369	mod5	JU830	serotonin	23.1931
Class II	QX1430	WT	QX1430	serotonin	15.052
Class II	QX1430	WT	QX1430	serotonin	14.4115
Class II	QX1430	WT	QX1430	serotonin	15.3723
Class II	QX1430	WT	QX1430	serotonin	16.3331
Class II	QX1430	WT	QX1430	serotonin	16.0128
Class II	QX1430	WT	QX1430	serotonin	12.49
Class II	MCP376	mod5	QX1430	serotonin	19.4739
Class II	MCP376	mod5	QX1430	serotonin	16.647
Class II	MCP376	mod5	QX1430	serotonin	18.6101
Class II	MCP376	mod5	QX1430	serotonin	14.6054
Class II	MCP376	mod5	QX1430	serotonin	17.4323
Class II	MCP376	mod5	QX1430	serotonin	14.3698
Class III B	JU751	WT	JU751	serotonin	6.90423
Class III B	JU751	WT	JU751	serotonin	2.96956
Class III B	JU751	WT	JU751	serotonin	1.18782
Class III B	JU751	WT	JU751	serotonin	3.56347
Class III B	JU751	WT	JU751	serotonin	6.7706
Class III B	JU751	WT	JU751	serotonin	2.96956
Class III B	MCP370	mod5	JU751	serotonin	6.70798
Class III B	MCP370	mod5	JU751	serotonin	2.40612
Class III B	MCP370	mod5	JU751	serotonin	3.93729
Class III B	MCP370	mod5	JU751	serotonin	4.37477
Class III B	MCP370	mod5	JU751	serotonin	3.20817
Class III B	MCP370	mod5	JU751	serotonin	4.66642
Class III A	JU830	WT	JU830	serotonin	25
Class III A	JU830	WT	JU830	serotonin	29
Class III A	JU830	WT	JU830	serotonin	20.3333
Class III A	JU830	WT	JU830	serotonin	26
Class III A	JU830	WT	JU830	serotonin	24.6667
Class III A	MCP369	mod5	JU830	serotonin	26.1331
Class III A	MCP369	mod5	JU830	serotonin	22.2131
Class III A	MCP369	mod5	JU830	serotonin	17.6399
Class III A	MCP369	mod5	JU830	serotonin	21.5598
Class III A	MCP369	mod5	JU830	serotonin	16.6599
Class III A	MCP369	mod5	JU830	serotonin	16.6599
Class II	QX1430	WT	QX1430	serotonin	13.4508
Class II	QX1430	WT	QX1430	serotonin	14.6517
Class II	QX1430	WT	QX1430	serotonin	18.735
Class II	QX1430	WT	QX1430	serotonin	11.5292
Class II	QX1430	WT	QX1430	serotonin	16.0128
Class II	QX1430	WT	QX1430	serotonin	12.1697
Class II	MCP376	mod5	QX1430	serotonin	16.647
Class II	MCP376	mod5	QX1430	serotonin	15.3907
Class II	MCP376	mod5	QX1430	serotonin	21.2014
Class II	MCP376	mod5	QX1430	serotonin	19.3168
Class II	MCP376	mod5	QX1430	serotonin	22.6148
Class II	MCP376	mod5	QX1430	serotonin	21.2014
Class III B	JU751	WT	JU751	serotonin	4.00891
Class III B	JU751	WT	JU751	serotonin	3.34076
Class III B	JU751	WT	JU751	serotonin	4.7513
Class III B	JU751	WT	JU751	serotonin	5.93912
Class III B	JU751	WT	JU751	serotonin	4.27617
Class III B	JU751	WT	JU751	serotonin	2.67261
Class III B	MCP370	mod5	JU751	serotonin	2.33321
Class III B	MCP370	mod5	JU751	serotonin	4.81225
Class III B	MCP370	mod5	JU751	serotonin	2.40612
Class III B	MCP370	mod5	JU751	serotonin	6.70798
Class III B	MCP370	mod5	JU751	serotonin	2.62486
Class III B	MCP370	mod5	JU751	serotonin	0.583303
Class III B	MCP370	mod5	JU751	serotonin	3.93729
Class II	N2	WT	N2	serotonin	9
Class II	N2	WT	N2	serotonin	15.6667
Class II	N2	WT	N2	serotonin	13
Class II	N2	WT	N2	serotonin	15.6667
Class II	N2	WT	N2	serotonin	20.6667
Class II	N2	WT	N2	serotonin	12.3333
Class II	MCP355	mod5	N2	serotonin	5.22662
Class II	MCP355	mod5	N2	serotonin	12.4132
Class II	MCP355	mod5	N2	serotonin	8.81993
Class II	MCP355	mod5	N2	serotonin	11.1066
Class II	MCP355	mod5	N2	serotonin	12.7399
Class II	MCP355	mod5	N2	serotonin	11.7599
Class II	MCP355	mod5	N2	serotonin	13.0666
Class II	QX1430	WT	QX1430	serotonin	13.4508
Class II	QX1430	WT	QX1430	serotonin	11.8495
Class II	QX1430	WT	QX1430	serotonin	9.60769
Class II	QX1430	WT	QX1430	serotonin	10.8887
Class II	QX1430	WT	QX1430	serotonin	8.32666
Class II	QX1430	WT	QX1430	serotonin	8.16653
Class II	MCP376	mod5	QX1430	serotonin	10.051
Class II	MCP376	mod5	QX1430	serotonin	9.10876
Class II	MCP376	mod5	QX1430	serotonin	9.42285
Class II	MCP376	mod5	QX1430	serotonin	8.79466
Class II	MCP376	mod5	QX1430	serotonin	8.79466
Class II	MCP376	mod5	QX1430	serotonin	10.6792
Class I	JU3166	WT	JU3166	serotonin	13.5593
Class I	JU3166	WT	JU3166	serotonin	15.7165
Class I	JU3166	WT	JU3166	serotonin	17.8737
Class I	JU3166	WT	JU3166	serotonin	17.5655
Class I	JU3166	WT	JU3166	serotonin	17.3344
Class I	JU3166	WT	JU3166	serotonin	15.2542
Class I	MCP383	mod5	JU3166	serotonin	14.9716
Class I	MCP383	mod5	JU3166	serotonin	15.4253
Class I	MCP383	mod5	JU3166	serotonin	16.7864
Class I	MCP383	mod5	JU3166	serotonin	13.1569
Class I	MCP383	mod5	JU3166	serotonin	15.1229
Class I	MCP383	mod5	JU3166	serotonin	10.4348
Class I	QG2873	WT	QG2873	serotonin	6.23608
Class I	QG2873	WT	QG2873	serotonin	1.3363
Class I	QG2873	WT	QG2873	serotonin	9.35412
Class I	QG2873	WT	QG2873	serotonin	9.79955
Class I	QG2873	WT	QG2873	serotonin	8.90869
Class I	QG2873	WT	QG2873	serotonin	5.34521
Class I	MCP380	mod5	QG2873	serotonin	9.6245
Class I	MCP380	mod5	QG2873	serotonin	10.7911
Class I	MCP380	mod5	QG2873	serotonin	10.4995
Class I	MCP380	mod5	QG2873	serotonin	10.2807
Class I	MCP380	mod5	QG2873	serotonin	10.062
Class I	MCP380	mod5	QG2873	serotonin	9.33285
Class II	N2	WT	N2	serotonin	6
Class II	N2	WT	N2	serotonin	9.25
Class II	N2	WT	N2	serotonin	11.25
Class II	N2	WT	N2	serotonin	14.5
Class II	N2	WT	N2	serotonin	13
Class II	N2	WT	N2	serotonin	14
Class II	MCP355	mod5	N2	serotonin	11.0249
Class II	MCP355	mod5	N2	serotonin	12.7399
Class II	MCP355	mod5	N2	serotonin	4.40996
Class II	MCP355	mod5	N2	serotonin	11.1066
Class II	MCP355	mod5	N2	serotonin	11.3679
Class II	MCP355	mod5	N2	serotonin	15.3532
Class II	QX1430	WT	QX1430	serotonin	10.8887
Class II	QX1430	WT	QX1430	serotonin	5.76461
Class II	QX1430	WT	QX1430	serotonin	10.5685
Class II	QX1430	WT	QX1430	serotonin	15.3723
Class II	QX1430	WT	QX1430	serotonin	10.0881
Class II	QX1430	WT	QX1430	serotonin	11.0488
Class II	MCP376	mod5	QX1430	serotonin	9.89399
Class II	MCP376	mod5	QX1430	serotonin	9.61131
Class II	MCP376	mod5	QX1430	serotonin	9.10876
Class II	MCP376	mod5	QX1430	serotonin	12.5638
Class II	MCP376	mod5	QX1430	serotonin	9.42285
Class II	MCP376	mod5	QX1430	serotonin	6.83157
Class I	JU3166	WT	JU3166	serotonin	15.4854
Class I	JU3166	WT	JU3166	serotonin	15.4854
Class I	JU3166	WT	JU3166	serotonin	15.4083
Class I	JU3166	WT	JU3166	serotonin	12.4807
Class I	JU3166	WT	JU3166	serotonin	17.8737
Class I	JU3166	WT	JU3166	serotonin	9.24499
Class I	MCP383	mod5	JU3166	serotonin	12.2495
Class I	MCP383	mod5	JU3166	serotonin	16.3327
Class I	MCP383	mod5	JU3166	serotonin	18.7524
Class I	MCP383	mod5	JU3166	serotonin	19.3573
Class I	MCP383	mod5	JU3166	serotonin	9.30057
Class I	MCP383	mod5	JU3166	serotonin	9.9811
Class I	QG2873	WT	QG2873	serotonin	3.11804
Class I	QG2873	WT	QG2873	serotonin	10.3935
Class I	QG2873	WT	QG2873	serotonin	8.37416
Class I	QG2873	WT	QG2873	serotonin	7.57238
Class I	QG2873	WT	QG2873	serotonin	7.30512
Class I	QG2873	WT	QG2873	serotonin	4.15739
Class I	MCP380	mod5	QG2873	serotonin	8.53081
Class I	MCP380	mod5	QG2873	serotonin	10.4995
Class I	MCP380	mod5	QG2873	serotonin	9.0412
Class I	MCP380	mod5	QG2873	serotonin	9.33285
Class I	MCP380	mod5	QG2873	serotonin	5.54138
Class I	MCP380	mod5	QG2873	serotonin	9.0412
Class II	N2	WT	N2	serotonin	11.6667
Class II	N2	WT	N2	serotonin	14
Class II	N2	WT	N2	serotonin	13
Class II	N2	WT	N2	serotonin	15
Class II	N2	WT	N2	serotonin	13.3333
Class II	N2	WT	N2	serotonin	11
Class II	MCP355	mod5	N2	serotonin	2.93998
Class II	MCP355	mod5	N2	serotonin	10.4532
Class II	MCP355	mod5	N2	serotonin	10.4532
Class II	MCP355	mod5	N2	serotonin	9.47325
Class II	MCP355	mod5	N2	serotonin	6.85994
Class II	MCP355	mod5	N2	serotonin	7.18661
Class II	MCP355	mod5	N2	serotonin	8.32993
Class II	QX1430	WT	QX1430	serotonin	13.1305
Class II	QX1430	WT	QX1430	serotonin	10.5685
Class II	QX1430	WT	QX1430	serotonin	10.2482
Class II	QX1430	WT	QX1430	serotonin	10.8887
Class II	QX1430	WT	QX1430	serotonin	9.28743
Class II	QX1430	WT	QX1430	serotonin	8.64692
Class II	MCP376	mod5	QX1430	serotonin	11.7786
Class II	MCP376	mod5	QX1430	serotonin	8.16647
Class II	MCP376	mod5	QX1430	serotonin	8.48057
Class II	MCP376	mod5	QX1430	serotonin	10.051
Class II	MCP376	mod5	QX1430	serotonin	7.06714
Class II	MCP376	mod5	QX1430	serotonin	8.00942
Class I	JU3166	WT	JU3166	serotonin	14.1757
Class I	JU3166	WT	JU3166	serotonin	11.094
Class I	JU3166	WT	JU3166	serotonin	12.3267
Class I	JU3166	WT	JU3166	serotonin	12.6348
Class I	JU3166	WT	JU3166	serotonin	13.2512
Class I	JU3166	WT	JU3166	serotonin	15.4083
Class I	MCP383	mod5	JU3166	serotonin	11.7958
Class I	MCP383	mod5	JU3166	serotonin	13.8374
Class I	MCP383	mod5	JU3166	serotonin	12.4008
Class I	MCP383	mod5	JU3166	serotonin	13.0057
Class I	MCP383	mod5	JU3166	serotonin	14.518
Class I	MCP383	mod5	JU3166	serotonin	11.7958
Class I	QG2873	WT	QG2873	serotonin	7.72086
Class I	QG2873	WT	QG2873	serotonin	8.90869
Class I	QG2873	WT	QG2873	serotonin	8.01782
Class I	QG2873	WT	QG2873	serotonin	8.01782
Class I	QG2873	WT	QG2873	serotonin	7.4239
Class I	QG2873	WT	QG2873	serotonin	5.93912
Class I	MCP380	mod5	QG2873	serotonin	8.16624
Class I	MCP380	mod5	QG2873	serotonin	5.24973
Class I	MCP380	mod5	QG2873	serotonin	9.18702
Class I	MCP380	mod5	QG2873	serotonin	9.0412
Class I	MCP380	mod5	QG2873	serotonin	8.74954
Class I	MCP380	mod5	QG2873	serotonin	8.74954
Class II	N2	WT	N2	serotonin	10.3333
Class II	N2	WT	N2	serotonin	9.2
Class II	N2	WT	N2	serotonin	11.3333
Class II	N2	WT	N2	serotonin	9.66667
Class II	N2	WT	N2	serotonin	14
Class II	N2	WT	N2	serotonin	9.5
Class II	MCP355	mod5	N2	serotonin	5.55329
Class II	MCP355	mod5	N2	serotonin	13.7199
Class II	MCP355	mod5	N2	serotonin	9.79992
Class II	MCP355	mod5	N2	serotonin	13.3932
Class II	MCP355	mod5	N2	serotonin	9.79992
Class II	MCP355	mod5	N2	serotonin	9.79992
Class II	QX1430	WT	QX1430	serotonin	7.68615
Class II	QX1430	WT	QX1430	serotonin	12.2498
Class II	QX1430	WT	QX1430	serotonin	6.40512
Class II	QX1430	WT	QX1430	serotonin	6.40512
Class II	QX1430	WT	QX1430	serotonin	11.209
Class II	QX1430	WT	QX1430	serotonin	6.91753
Class II	MCP376	mod5	QX1430	serotonin	12.2497
Class II	MCP376	mod5	QX1430	serotonin	15.0766
Class II	MCP376	mod5	QX1430	serotonin	7.85238
Class II	MCP376	mod5	QX1430	serotonin	12.5638
Class II	MCP376	mod5	QX1430	serotonin	7.85238
Class II	MCP376	mod5	QX1430	serotonin	12.5638
Class I	JU3166	WT	JU3166	serotonin	13.8675
Class I	JU3166	WT	JU3166	serotonin	16.1787
Class I	JU3166	WT	JU3166	serotonin	16.3328
Class I	JU3166	WT	JU3166	serotonin	15.1002
Class I	JU3166	WT	JU3166	serotonin	15.4083
Class I	JU3166	WT	JU3166	serotonin	12.0185
Class I	MCP383	mod5	JU3166	serotonin	16.9376
Class I	MCP383	mod5	JU3166	serotonin	12.7032
Class I	MCP383	mod5	JU3166	serotonin	15.4253
Class I	MCP383	mod5	JU3166	serotonin	13.6106
Class I	MCP383	mod5	JU3166	serotonin	11.1909
Class I	MCP383	mod5	JU3166	serotonin	12.2495
Class I	QG2873	WT	QG2873	serotonin	11.5813
Class I	QG2873	WT	QG2873	serotonin	9.79955
Class I	QG2873	WT	QG2873	serotonin	5.64217
Class I	QG2873	WT	QG2873	serotonin	7.4239
Class I	QG2873	WT	QG2873	serotonin	5.34521
Class I	QG2873	WT	QG2873	serotonin	5.34521
Class I	MCP380	mod5	QG2873	serotonin	7.87459
Class I	MCP380	mod5	QG2873	serotonin	7.29129
Class I	MCP380	mod5	QG2873	serotonin	7.87459
Class I	MCP380	mod5	QG2873	serotonin	10.7911
Class I	MCP380	mod5	QG2873	serotonin	8.31207
Class I	MCP380	mod5	QG2873	serotonin	2.8436
Class III A	ED3005	WT	ED3005	serotonin	21
Class III A	ED3005	WT	ED3005	serotonin	11
Class III A	ED3005	WT	ED3005	serotonin	21
Class III A	ED3005	WT	ED3005	serotonin	22
Class III A	ED3005	WT	ED3005	serotonin	15.6667
Class III A	ED3005	WT	ED3005	serotonin	15.5
Class III A	MCP374	mod5	ED3005	serotonin	30.3797
Class III A	MCP374	mod5	ED3005	serotonin	13.9649
Class III A	MCP374	mod5	ED3005	serotonin	14.0465
Class III A	MCP374	mod5	ED3005	serotonin	9.79992
Class III A	MCP374	mod5	ED3005	serotonin	21.5598
Class III A	MCP374	mod5	ED3005	serotonin	16.2679
Class III A	JU2829	WT	JU2829	serotonin	0.640512
Class III A	JU2829	WT	JU2829	serotonin	0
Class III A	JU2829	WT	JU2829	serotonin	0.320256
Class III A	JU2829	WT	JU2829	serotonin	0.640512
Class III A	JU2829	WT	JU2829	serotonin	3.84307
Class III A	JU2829	WT	JU2829	serotonin	0.320256
Class III A	MCP378	mod5	JU2829	serotonin	4.08324
Class III A	MCP378	mod5	JU2829	serotonin	5.96781
Class III A	MCP378	mod5	JU2829	serotonin	0.62819
Class III A	MCP378	mod5	JU2829	serotonin	5.02552
Class III A	MCP378	mod5	JU2829	serotonin	1.88457
Class III A	MCP378	mod5	JU2829	serotonin	3.20377
Class III A	JU830	WT	JU830	serotonin	22.4961
Class III A	JU830	WT	JU830	serotonin	25.4237
Class III A	JU830	WT	JU830	serotonin	24.5917
Class III A	JU830	WT	JU830	serotonin	29.7689
Class III A	JU830	WT	JU830	serotonin	25.4237
Class III A	JU830	WT	JU830	serotonin	22.8043
Class III A	MCP369	mod5	JU830	serotonin	30.2457
Class III A	MCP369	mod5	JU830	serotonin	25.4064
Class III A	MCP369	mod5	JU830	serotonin	17.5425
Class III A	MCP369	mod5	JU830	serotonin	32.0605
Class III A	MCP369	mod5	JU830	serotonin	16.3327
Class III A	MCP369	mod5	JU830	serotonin	23.5917
Class III A	ED3005	WT	ED3005	serotonin	13
Class III A	ED3005	WT	ED3005	serotonin	15.3333
Class III A	ED3005	WT	ED3005	serotonin	22.3333
Class III A	ED3005	WT	ED3005	serotonin	20.3333
Class III A	ED3005	WT	ED3005	serotonin	26.6667
Class III A	ED3005	WT	ED3005	serotonin	20.3333
Class III A	MCP374	mod5	ED3005	serotonin	18.6198
Class III A	MCP374	mod5	ED3005	serotonin	17.6399
Class III A	MCP374	mod5	ED3005	serotonin	26.4598
Class III A	MCP374	mod5	ED3005	serotonin	17.3132
Class III A	MCP374	mod5	ED3005	serotonin	21.8865
Class III A	MCP374	mod5	ED3005	serotonin	19.4038
Class III A	JU2829	WT	JU2829	serotonin	2.24179
Class III A	JU2829	WT	JU2829	serotonin	0.960769
Class III A	JU2829	WT	JU2829	serotonin	1.92154
Class III A	JU2829	WT	JU2829	serotonin	0
Class III A	JU2829	WT	JU2829	serotonin	1.44115
Class III A	JU2829	WT	JU2829	serotonin	0.960769
Class III A	MCP378	mod5	JU2829	serotonin	0
Class III A	MCP378	mod5	JU2829	serotonin	0.62819
Class III A	MCP378	mod5	JU2829	serotonin	8.79466
Class III A	MCP378	mod5	JU2829	serotonin	5.65371
Class III A	MCP378	mod5	JU2829	serotonin	2.35571
Class III A	MCP378	mod5	JU2829	serotonin	0
Class III A	JU830	WT	JU830	serotonin	22.6502
Class III A	JU830	WT	JU830	serotonin	17.2573
Class III A	JU830	WT	JU830	serotonin	19.1063
Class III A	JU830	WT	JU830	serotonin	19.4145
Class III A	JU830	WT	JU830	serotonin	22.5578
Class III A	JU830	WT	JU830	serotonin	19.4145
Class III A	MCP369	mod5	JU830	serotonin	27.6749
Class III A	MCP369	mod5	JU830	serotonin	29.9433
Class III A	MCP369	mod5	JU830	serotonin	23.5917
Class III A	MCP369	mod5	JU830	serotonin	29.9433
Class III A	MCP369	mod5	JU830	serotonin	26.3138
Class III A	MCP369	mod5	JU830	serotonin	17.4669
Class III A	ED3005	WT	ED3005	serotonin	27.6667
Class III A	ED3005	WT	ED3005	serotonin	11.75
Class III A	ED3005	WT	ED3005	serotonin	8.33333
Class III A	ED3005	WT	ED3005	serotonin	19.5
Class III A	ED3005	WT	ED3005	serotonin	17.5
Class III A	ED3005	WT	ED3005	serotonin	18.6667
Class III A	MCP374	mod5	ED3005	serotonin	17.4439
Class III A	MCP374	mod5	ED3005	serotonin	20.8248
Class III A	MCP374	mod5	ED3005	serotonin	17.9665
Class III A	MCP374	mod5	ED3005	serotonin	25.8065
Class III A	MCP374	mod5	ED3005	serotonin	24.0098
Class III A	MCP374	mod5	ED3005	serotonin	20.8248
Class III A	JU2829	WT	JU2829	serotonin	0.320256
Class III A	JU2829	WT	JU2829	serotonin	0.960769
Class III A	JU2829	WT	JU2829	serotonin	0.960769
Class III A	JU2829	WT	JU2829	serotonin	0
Class III A	JU2829	WT	JU2829	serotonin	0
Class III A	JU2829	WT	JU2829	serotonin	0.640512
Class III A	MCP378	mod5	JU2829	serotonin	2.07303
Class III A	MCP378	mod5	JU2829	serotonin	2.07303
Class III A	MCP378	mod5	JU2829	serotonin	5.08834
Class III A	MCP378	mod5	JU2829	serotonin	2.82686
Class III A	MCP378	mod5	JU2829	serotonin	1.72752
Class III A	MCP378	mod5	JU2829	serotonin	3.20377
Class III A	JU830	WT	JU830	serotonin	21.7257
Class III A	JU830	WT	JU830	serotonin	25.4237
Class III A	JU830	WT	JU830	serotonin	17.1032
Class III A	JU830	WT	JU830	serotonin	24.3451
Class III A	JU830	WT	JU830	serotonin	21.8798
Class III A	JU830	WT	JU830	serotonin	22.4191
Class III A	MCP369	mod5	JU830	serotonin	22.5028
Class III A	MCP369	mod5	JU830	serotonin	21.172
Class III A	MCP369	mod5	JU830	serotonin	20.6881
Class III A	MCP369	mod5	JU830	serotonin	19.9622
Class III A	MCP369	mod5	JU830	serotonin	20.189
Class III A	MCP369	mod5	JU830	serotonin	17.5425
Class III B	JU751	WT	JU751	serotonin	1.48478
Class III B	JU751	WT	JU751	serotonin	2.00445
Class III B	JU751	WT	JU751	serotonin	6.23608
Class III B	JU751	WT	JU751	serotonin	2.67261
Class III B	JU751	WT	JU751	serotonin	4.23163
Class III B	JU751	WT	JU751	serotonin	4.67706
Class III B	MCP370	mod5	JU751	serotonin	5.37472
Class III B	MCP370	mod5	JU751	serotonin	5.54138
Class III B	MCP370	mod5	JU751	serotonin	7.87459
Class III B	MCP370	mod5	JU751	serotonin	3.49982
Class III B	MCP370	mod5	JU751	serotonin	6.12468
Class III B	MCP370	mod5	JU751	serotonin	3.49982
Class III A	ED3005	WT	ED3005	serotonin	16.5
Class III A	ED3005	WT	ED3005	serotonin	5
Class III A	ED3005	WT	ED3005	serotonin	16.3333
Class III A	ED3005	WT	ED3005	serotonin	16.3333
Class III A	ED3005	WT	ED3005	serotonin	15.3333
Class III A	ED3005	WT	ED3005	serotonin	11.6667
Class III A	MCP374	mod5	ED3005	serotonin	22.0498
Class III A	MCP374	mod5	ED3005	serotonin	19.5998
Class III A	MCP374	mod5	ED3005	serotonin	15.1899
Class III A	MCP374	mod5	ED3005	serotonin	13.0666
Class III A	MCP374	mod5	ED3005	serotonin	18.1298
Class III A	MCP374	mod5	ED3005	serotonin	11.5149
Class III A	JU2829	WT	JU2829	serotonin	0.240192
Class III A	JU2829	WT	JU2829	serotonin	1.28102
Class III A	JU2829	WT	JU2829	serotonin	0.480384
Class III A	JU2829	WT	JU2829	serotonin	0.960769
Class III A	JU2829	WT	JU2829	serotonin	0
Class III A	JU2829	WT	JU2829	serotonin	0.960769
Class III A	MCP378	mod5	JU2829	serotonin	1.41343
Class III A	MCP378	mod5	JU2829	serotonin	0
Class III A	MCP378	mod5	JU2829	serotonin	0
Class III A	MCP378	mod5	JU2829	serotonin	0
Class III A	MCP378	mod5	JU2829	serotonin	0
Class III A	MCP378	mod5	JU2829	serotonin	0
Class III A	JU830	WT	JU830	serotonin	24.3451
Class III A	JU830	WT	JU830	serotonin	12.943
Class III A	JU830	WT	JU830	serotonin	16.9492
Class III A	JU830	WT	JU830	serotonin	24.6533
Class III A	JU830	WT	JU830	serotonin	25.5778
Class III A	JU830	WT	JU830	serotonin	11.094
Class III A	MCP369	mod5	JU830	serotonin	28.431
Class III A	MCP369	mod5	JU830	serotonin	28.1285
Class III A	MCP369	mod5	JU830	serotonin	22.3819
Class III A	MCP369	mod5	JU830	serotonin	16.3327
Class III A	MCP369	mod5	JU830	serotonin	26.5406
Class III A	MCP369	mod5	JU830	serotonin	20.4159
Class III B	JU751	WT	JU751	serotonin	5.93912
Class III B	JU751	WT	JU751	serotonin	0
Class III B	JU751	WT	JU751	serotonin	7.4239
Class III B	JU751	WT	JU751	serotonin	6.68151
Class III B	JU751	WT	JU751	serotonin	0
Class III B	JU751	WT	JU751	serotonin	2.67261
Class III B	MCP370	mod5	JU751	serotonin	3.06234
Class III B	MCP370	mod5	JU751	serotonin	1.45826
Class III B	MCP370	mod5	JU751	serotonin	4.37477
Class III B	MCP370	mod5	JU751	serotonin	5.54138
Class III B	MCP370	mod5	JU751	serotonin	0
Class III B	MCP370	mod5	JU751	serotonin	0.291651

## Sheet: Figure 8C, Figure Supplement 1B
Strain	state	Background	Treatment (serotonin concentration)	Eggs laid per animal
CB4856	WT	CB4856	0mg/mL	0
CB4856	WT	CB4856	0mg/mL	0
CB4856	WT	CB4856	0mg/mL	0
CB4856	WT	CB4856	1.5mg/mL	0
CB4856	WT	CB4856	1.5mg/mL	0
CB4856	WT	CB4856	1.5mg/mL	0
CB4856	WT	CB4856	2.5mg/mL	1
CB4856	WT	CB4856	2.5mg/mL	1.66667
CB4856	WT	CB4856	2.5mg/mL	0.5
CB4856	WT	CB4856	5mg/mL	3
CB4856	WT	CB4856	5mg/mL	4
CB4856	WT	CB4856	5mg/mL	4.33333
JU1200	WT	JU1200	0mg/mL	0.666667
JU1200	WT	JU1200	0mg/mL	0
JU1200	WT	JU1200	0mg/mL	0
JU1200	WT	JU1200	1.5mg/mL	1
JU1200	WT	JU1200	1.5mg/mL	0
JU1200	WT	JU1200	1.5mg/mL	3.66667
JU1200	WT	JU1200	2.5mg/mL	3
JU1200	WT	JU1200	2.5mg/mL	3
JU1200	WT	JU1200	2.5mg/mL	0
JU1200	WT	JU1200	5mg/mL	2.8
JU1200	WT	JU1200	5mg/mL	6
JU1200	WT	JU1200	5mg/mL	8.33333
JU2829	WT	JU2829	0mg/mL	0.666667
JU2829	WT	JU2829	0mg/mL	0.75
JU2829	WT	JU2829	0mg/mL	0.25
JU2829	WT	JU2829	1.5mg/mL	0.4
JU2829	WT	JU2829	1.5mg/mL	1.25
JU2829	WT	JU2829	1.5mg/mL	3.66667
JU2829	WT	JU2829	2.5mg/mL	2.33333
JU2829	WT	JU2829	2.5mg/mL	1
JU2829	WT	JU2829	2.5mg/mL	0
JU2829	WT	JU2829	5mg/mL	0
JU2829	WT	JU2829	5mg/mL	1
JU2829	WT	JU2829	5mg/mL	0
JU3166	WT	JU3166	0mg/mL	0.666667
JU3166	WT	JU3166	0mg/mL	1.5
JU3166	WT	JU3166	0mg/mL	0
JU3166	WT	JU3166	1.5mg/mL	7
JU3166	WT	JU3166	1.5mg/mL	8.33333
JU3166	WT	JU3166	1.5mg/mL	3.75
JU3166	WT	JU3166	2.5mg/mL	9
JU3166	WT	JU3166	2.5mg/mL	8.33333
JU3166	WT	JU3166	2.5mg/mL	5.25
JU3166	WT	JU3166	5mg/mL	12.3333
JU3166	WT	JU3166	5mg/mL	17
JU3166	WT	JU3166	5mg/mL	11.6667
JU751	WT	JU751	0mg/mL	0
JU751	WT	JU751	0mg/mL	0.333333
JU751	WT	JU751	0mg/mL	0
JU751	WT	JU751	1.5mg/mL	0
JU751	WT	JU751	1.5mg/mL	0
JU751	WT	JU751	1.5mg/mL	1.33333
JU751	WT	JU751	2.5mg/mL	1
JU751	WT	JU751	2.5mg/mL	1
JU751	WT	JU751	2.5mg/mL	1.8
JU751	WT	JU751	5mg/mL	1
JU751	WT	JU751	5mg/mL	2.66667
JU751	WT	JU751	5mg/mL	1.66667
MCP355	mod5	N2	0mg/mL	5
MCP355	mod5	N2	0mg/mL	7
MCP355	mod5	N2	0mg/mL	5
MCP355	mod5	N2	1.5mg/mL	3
MCP355	mod5	N2	1.5mg/mL	2.66667
MCP355	mod5	N2	1.5mg/mL	4
MCP355	mod5	N2	2.5mg/mL	5
MCP355	mod5	N2	2.5mg/mL	2
MCP355	mod5	N2	2.5mg/mL	3
MCP355	mod5	N2	5mg/mL	6.33333
MCP355	mod5	N2	5mg/mL	4.66667
MCP355	mod5	N2	5mg/mL	4.75
MCP355	mod5	N2	0mg/mL	3
MCP355	mod5	N2	0mg/mL	3.66667
MCP355	mod5	N2	0mg/mL	6
MCP355	mod5	N2	1.5mg/mL	3.66667
MCP355	mod5	N2	1.5mg/mL	7.75
MCP355	mod5	N2	1.5mg/mL	5
MCP355	mod5	N2	2.5mg/mL	5
MCP355	mod5	N2	2.5mg/mL	5
MCP355	mod5	N2	2.5mg/mL	7.5
MCP355	mod5	N2	5mg/mL	2.5
MCP355	mod5	N2	5mg/mL	4.5
MCP355	mod5	N2	5mg/mL	5
MCP370	mod5	JU751	0mg/mL	1
MCP370	mod5	JU751	0mg/mL	0.166667
MCP370	mod5	JU751	0mg/mL	0
MCP370	mod5	JU751	1.5mg/mL	2.25
MCP370	mod5	JU751	1.5mg/mL	3
MCP370	mod5	JU751	1.5mg/mL	0
MCP370	mod5	JU751	2.5mg/mL	2
MCP370	mod5	JU751	2.5mg/mL	1.66667
MCP370	mod5	JU751	2.5mg/mL	2.75
MCP370	mod5	JU751	5mg/mL	1.33333
MCP370	mod5	JU751	5mg/mL	4.5
MCP370	mod5	JU751	5mg/mL	0.6
MCP378	mod5	JU2829	0mg/mL	5.8
MCP378	mod5	JU2829	0mg/mL	6.33333
MCP378	mod5	JU2829	0mg/mL	5
MCP378	mod5	JU2829	1.5mg/mL	5.33333
MCP378	mod5	JU2829	1.5mg/mL	5
MCP378	mod5	JU2829	1.5mg/mL	6
MCP378	mod5	JU2829	2.5mg/mL	4
MCP378	mod5	JU2829	2.5mg/mL	0
MCP378	mod5	JU2829	2.5mg/mL	1.33333
MCP378	mod5	JU2829	5mg/mL	0
MCP378	mod5	JU2829	5mg/mL	0
MCP378	mod5	JU2829	5mg/mL	1
MCP380	mod5	QG2873	0mg/mL	1
MCP380	mod5	QG2873	0mg/mL	3
MCP380	mod5	QG2873	0mg/mL	3
MCP380	mod5	QG2873	1.5mg/mL	9.33333
MCP380	mod5	QG2873	1.5mg/mL	9.33333
MCP380	mod5	QG2873	1.5mg/mL	11.6667
MCP380	mod5	QG2873	2.5mg/mL	8
MCP380	mod5	QG2873	2.5mg/mL	7.33333
MCP380	mod5	QG2873	2.5mg/mL	6.66667
MCP380	mod5	QG2873	5mg/mL	11.6667
MCP380	mod5	QG2873	5mg/mL	11.6667
MCP380	mod5	QG2873	5mg/mL	11
MCP381	mod5	JU1200	0mg/mL	2.66667
MCP381	mod5	JU1200	0mg/mL	1.66667
MCP381	mod5	JU1200	0mg/mL	2
MCP381	mod5	JU1200	1.5mg/mL	2.75
MCP381	mod5	JU1200	1.5mg/mL	2
MCP381	mod5	JU1200	1.5mg/mL	5.33333
MCP381	mod5	JU1200	2.5mg/mL	3.66667
MCP381	mod5	JU1200	2.5mg/mL	4.66667
MCP381	mod5	JU1200	2.5mg/mL	3.25
MCP381	mod5	JU1200	5mg/mL	5
MCP381	mod5	JU1200	5mg/mL	8.33333
MCP381	mod5	JU1200	5mg/mL	2.66667
MCP383	mod5	JU3166	0mg/mL	0
MCP383	mod5	JU3166	0mg/mL	3
MCP383	mod5	JU3166	0mg/mL	3.5
MCP383	mod5	JU3166	1.5mg/mL	11.3333
MCP383	mod5	JU3166	1.5mg/mL	6.66667
MCP383	mod5	JU3166	1.5mg/mL	10
MCP383	mod5	JU3166	2.5mg/mL	12.3333
MCP383	mod5	JU3166	2.5mg/mL	9
MCP383	mod5	JU3166	2.5mg/mL	9.6
MCP383	mod5	JU3166	5mg/mL	7.33333
MCP383	mod5	JU3166	5mg/mL	12.3333
MCP383	mod5	JU3166	5mg/mL	10.75
MCP387	mod5	CB4856	0mg/mL	0.333333
MCP387	mod5	CB4856	0mg/mL	0
MCP387	mod5	CB4856	0mg/mL	2
MCP387	mod5	CB4856	1.5mg/mL	6
MCP387	mod5	CB4856	1.5mg/mL	2
MCP387	mod5	CB4856	1.5mg/mL	2
MCP387	mod5	CB4856	2.5mg/mL	5.33333
MCP387	mod5	CB4856	2.5mg/mL	5.75
MCP387	mod5	CB4856	2.5mg/mL	4.5
MCP387	mod5	CB4856	5mg/mL	4.66667
MCP387	mod5	CB4856	5mg/mL	5.75
MCP387	mod5	CB4856	5mg/mL	7
N2	mod5	N2	0mg/mL	2.33333
N2	WT	N2	0mg/mL	4.5
N2	WT	N2	0mg/mL	0
N2	WT	N2	1.5mg/mL	3
N2	WT	N2	1.5mg/mL	2
N2	WT	N2	1.5mg/mL	1.5
N2	WT	N2	2.5mg/mL	1.66667
N2	WT	N2	2.5mg/mL	0.5
N2	WT	N2	2.5mg/mL	0.75
N2	WT	N2	5mg/mL	13
N2	WT	N2	5mg/mL	7.66667
N2	WT	N2	5mg/mL	7.66667
QG2873	WT	QG2873	0mg/mL	1
QG2873	WT	QG2873	0mg/mL	0
QG2873	WT	QG2873	0mg/mL	0
QG2873	WT	QG2873	1.5mg/mL	4
QG2873	WT	QG2873	1.5mg/mL	1
QG2873	WT	QG2873	1.5mg/mL	4.33333
QG2873	WT	QG2873	2.5mg/mL	4
QG2873	WT	QG2873	2.5mg/mL	4.66667
QG2873	WT	QG2873	2.5mg/mL	6
QG2873	WT	QG2873	5mg/mL	5.5
QG2873	WT	QG2873	5mg/mL	4
QG2873	WT	QG2873	5mg/mL	4.33333
CB4856	WT	CB4856	0mg/mL	0
CB4856	WT	CB4856	0mg/mL	0
CB4856	WT	CB4856	0mg/mL	0.666667
CB4856	WT	CB4856	1.5mg/mL	0
CB4856	WT	CB4856	1.5mg/mL	0
CB4856	WT	CB4856	1.5mg/mL	0
CB4856	WT	CB4856	2.5mg/mL	6.33333
CB4856	WT	CB4856	2.5mg/mL	3
CB4856	WT	CB4856	2.5mg/mL	4.66667
CB4856	WT	CB4856	5mg/mL	2
CB4856	WT	CB4856	5mg/mL	6.66667
CB4856	WT	CB4856	5mg/mL	5.8
ED3005	WT	ED3005	0mg/mL	1.66667
ED3005	WT	ED3005	0mg/mL	0.666667
ED3005	WT	ED3005	0mg/mL	1.75
ED3005	WT	ED3005	1.5mg/mL	8
ED3005	WT	ED3005	1.5mg/mL	0.666667
ED3005	WT	ED3005	1.5mg/mL	4
ED3005	WT	ED3005	2.5mg/mL	20
ED3005	WT	ED3005	2.5mg/mL	1.33333
ED3005	WT	ED3005	2.5mg/mL	3
ED3005	WT	ED3005	5mg/mL	13.6667
ED3005	WT	ED3005	5mg/mL	11.3333
ED3005	WT	ED3005	5mg/mL	12.3333
ED3005	WT	ED3005	0mg/mL	0
ED3005	WT	ED3005	0mg/mL	0.666667
ED3005	WT	ED3005	0mg/mL	2.33333
ED3005	WT	ED3005	1.5mg/mL	3.33333
ED3005	WT	ED3005	1.5mg/mL	3.25
ED3005	WT	ED3005	1.5mg/mL	3
ED3005	WT	ED3005	2.5mg/mL	7
ED3005	WT	ED3005	2.5mg/mL	4.66667
ED3005	WT	ED3005	2.5mg/mL	1.66667
ED3005	WT	ED3005	5mg/mL	12
ED3005	WT	ED3005	5mg/mL	6.33333
ED3005	WT	ED3005	5mg/mL	13.3333
ED3005	WT	ED3005	0mg/mL	0.4
ED3005	WT	ED3005	0mg/mL	1.25
ED3005	WT	ED3005	0mg/mL	1.8
ED3005	WT	ED3005	1.5mg/mL	2
ED3005	WT	ED3005	1.5mg/mL	0
ED3005	WT	ED3005	1.5mg/mL	5.66667
ED3005	WT	ED3005	2.5mg/mL	11.3333
ED3005	WT	ED3005	2.5mg/mL	6.66667
ED3005	WT	ED3005	2.5mg/mL	4
ED3005	WT	ED3005	5mg/mL	17
ED3005	WT	ED3005	5mg/mL	17
ED3005	WT	ED3005	5mg/mL	10.5
JU1200	WT	JU1200	0mg/mL	1
JU1200	WT	JU1200	0mg/mL	0
JU1200	WT	JU1200	0mg/mL	1.25
JU1200	WT	JU1200	1.5mg/mL	3.33333
JU1200	WT	JU1200	1.5mg/mL	1.66667
JU1200	WT	JU1200	1.5mg/mL	1.33333
JU1200	WT	JU1200	2.5mg/mL	1.75
JU1200	WT	JU1200	2.5mg/mL	1.2
JU1200	WT	JU1200	2.5mg/mL	1
JU1200	WT	JU1200	5mg/mL	4
JU1200	WT	JU1200	5mg/mL	10.6667
JU1200	WT	JU1200	5mg/mL	3.66667
JU2829	WT	JU2829	0mg/mL	3.75
JU2829	WT	JU2829	0mg/mL	2.2
JU2829	WT	JU2829	0mg/mL	5
JU2829	WT	JU2829	1.5mg/mL	4
JU2829	WT	JU2829	1.5mg/mL	4.25
JU2829	WT	JU2829	1.5mg/mL	5
JU2829	WT	JU2829	2.5mg/mL	8.2
JU2829	WT	JU2829	2.5mg/mL	4
JU2829	WT	JU2829	2.5mg/mL	2.5
JU2829	WT	JU2829	5mg/mL	6.33333
JU2829	WT	JU2829	5mg/mL	1.33333
JU2829	WT	JU2829	5mg/mL	0
JU3166	WT	JU3166	0mg/mL	1
JU3166	WT	JU3166	0mg/mL	1.33333
JU3166	WT	JU3166	0mg/mL	2.33333
JU3166	WT	JU3166	1.5mg/mL	1
JU3166	WT	JU3166	1.5mg/mL	1.66667
JU3166	WT	JU3166	1.5mg/mL	1
JU3166	WT	JU3166	2.5mg/mL	3
JU3166	WT	JU3166	2.5mg/mL	6
JU3166	WT	JU3166	2.5mg/mL	7.66667
JU3166	WT	JU3166	5mg/mL	16.6667
JU3166	WT	JU3166	5mg/mL	12.6
JU3166	WT	JU3166	5mg/mL	15.8
JU751	WT	JU751	0mg/mL	0
JU751	WT	JU751	0mg/mL	0.25
JU751	WT	JU751	0mg/mL	0.333333
JU751	WT	JU751	1.5mg/mL	1
JU751	WT	JU751	1.5mg/mL	2.66667
JU751	WT	JU751	1.5mg/mL	2.33333
JU751	WT	JU751	2.5mg/mL	0
JU751	WT	JU751	2.5mg/mL	0.75
JU751	WT	JU751	2.5mg/mL	0.25
JU751	WT	JU751	5mg/mL	1
JU751	WT	JU751	5mg/mL	3.33333
JU751	WT	JU751	5mg/mL	2.33333
MCP355	mod5	N2	0mg/mL	3.75
MCP355	mod5	N2	0mg/mL	4
MCP355	mod5	N2	0mg/mL	5
MCP355	mod5	N2	1.5mg/mL	11.3333
MCP355	mod5	N2	1.5mg/mL	5
MCP355	mod5	N2	1.5mg/mL	9
MCP355	mod5	N2	2.5mg/mL	10.3333
MCP355	mod5	N2	2.5mg/mL	9.33333
MCP355	mod5	N2	2.5mg/mL	6.33333
MCP355	mod5	N2	5mg/mL	9.33333
MCP355	mod5	N2	5mg/mL	6.25
MCP355	mod5	N2	5mg/mL	8
MCP370	mod5	JU751	0mg/mL	4
MCP370	mod5	JU751	0mg/mL	7.33333
MCP370	mod5	JU751	0mg/mL	6.33333
MCP370	mod5	JU751	1.5mg/mL	4.75
MCP370	mod5	JU751	1.5mg/mL	5.66667
MCP370	mod5	JU751	1.5mg/mL	7.33333
MCP370	mod5	JU751	2.5mg/mL	5.33333
MCP370	mod5	JU751	2.5mg/mL	2.33333
MCP370	mod5	JU751	2.5mg/mL	4
MCP370	mod5	JU751	5mg/mL	2.75
MCP370	mod5	JU751	5mg/mL	0.666667
MCP370	mod5	JU751	5mg/mL	1.5
MCP374	mod5	ED3005	0mg/mL	0
MCP374	mod5	ED3005	0mg/mL	0.666667
MCP374	mod5	ED3005	0mg/mL	5.33333
MCP374	mod5	ED3005	1.5mg/mL	13.75
MCP374	mod5	ED3005	1.5mg/mL	14.6667
MCP374	mod5	ED3005	1.5mg/mL	15
MCP374	mod5	ED3005	2.5mg/mL	10.6667
MCP374	mod5	ED3005	2.5mg/mL	21
MCP374	mod5	ED3005	2.5mg/mL	12.75
MCP374	mod5	ED3005	5mg/mL	22
MCP374	mod5	ED3005	5mg/mL	12
MCP374	mod5	ED3005	5mg/mL	14
MCP374	mod5	ED3005	0mg/mL	0
MCP374	mod5	ED3005	0mg/mL	4
MCP374	mod5	ED3005	0mg/mL	5
MCP374	mod5	ED3005	1.5mg/mL	15
MCP374	mod5	ED3005	1.5mg/mL	13.3333
MCP374	mod5	ED3005	1.5mg/mL	7
MCP374	mod5	ED3005	2.5mg/mL	20.25
MCP374	mod5	ED3005	2.5mg/mL	10.5
MCP374	mod5	ED3005	2.5mg/mL	21.6667
MCP374	mod5	ED3005	5mg/mL	17
MCP374	mod5	ED3005	5mg/mL	18.3333
MCP374	mod5	ED3005	5mg/mL	15
MCP374	mod5	ED3005	0mg/mL	5
MCP374	mod5	ED3005	0mg/mL	1.33333
MCP374	mod5	ED3005	0mg/mL	0.666667
MCP374	mod5	ED3005	1.5mg/mL	11
MCP374	mod5	ED3005	1.5mg/mL	8.33333
MCP374	mod5	ED3005	1.5mg/mL	12.5
MCP374	mod5	ED3005	2.5mg/mL	14
MCP374	mod5	ED3005	2.5mg/mL	14.6667
MCP374	mod5	ED3005	2.5mg/mL	15
MCP374	mod5	ED3005	5mg/mL	16.3333
MCP374	mod5	ED3005	5mg/mL	10.6667
MCP374	mod5	ED3005	5mg/mL	14
MCP378	mod5	JU2829	0mg/mL	3.5
MCP378	mod5	JU2829	0mg/mL	5.71429
MCP378	mod5	JU2829	0mg/mL	3.5
MCP378	mod5	JU2829	1.5mg/mL	5.66667
MCP378	mod5	JU2829	1.5mg/mL	7.5
MCP378	mod5	JU2829	1.5mg/mL	9
MCP378	mod5	JU2829	2.5mg/mL	6.33333
MCP378	mod5	JU2829	2.5mg/mL	6.33333
MCP378	mod5	JU2829	2.5mg/mL	5.5
MCP378	mod5	JU2829	5mg/mL	4.5
MCP378	mod5	JU2829	5mg/mL	2
MCP378	mod5	JU2829	5mg/mL	0.5
MCP380	mod5	QG2873	0mg/mL	0.666667
MCP380	mod5	QG2873	0mg/mL	2
MCP380	mod5	QG2873	0mg/mL	4.66667
MCP380	mod5	QG2873	1.5mg/mL	8.75
MCP380	mod5	QG2873	1.5mg/mL	10.5
MCP380	mod5	QG2873	1.5mg/mL	7
MCP380	mod5	QG2873	2.5mg/mL	8.25
MCP380	mod5	QG2873	2.5mg/mL	11
MCP380	mod5	QG2873	2.5mg/mL	12.3333
MCP380	mod5	QG2873	5mg/mL	9
MCP380	mod5	QG2873	5mg/mL	11
MCP380	mod5	QG2873	5mg/mL	10.25
MCP381	mod5	JU1200	0mg/mL	2.33333
MCP381	mod5	JU1200	0mg/mL	1
MCP381	mod5	JU1200	0mg/mL	2.25
MCP381	mod5	JU1200	1.5mg/mL	2
MCP381	mod5	JU1200	1.5mg/mL	3
MCP381	mod5	JU1200	1.5mg/mL	5
MCP381	mod5	JU1200	2.5mg/mL	2.66667
MCP381	mod5	JU1200	2.5mg/mL	7.66667
MCP381	mod5	JU1200	2.5mg/mL	9
MCP381	mod5	JU1200	5mg/mL	8.33333
MCP381	mod5	JU1200	5mg/mL	9
MCP381	mod5	JU1200	5mg/mL	7
MCP383	mod5	JU3166	0mg/mL	3
MCP383	mod5	JU3166	0mg/mL	3.33333
MCP383	mod5	JU3166	0mg/mL	3.33333
MCP383	mod5	JU3166	1.5mg/mL	16.3333
MCP383	mod5	JU3166	1.5mg/mL	15.6667
MCP383	mod5	JU3166	1.5mg/mL	13
MCP383	mod5	JU3166	2.5mg/mL	15.5
MCP383	mod5	JU3166	2.5mg/mL	8.75
MCP383	mod5	JU3166	2.5mg/mL	10
MCP383	mod5	JU3166	5mg/mL	14.75
MCP383	mod5	JU3166	5mg/mL	10.3333
MCP383	mod5	JU3166	5mg/mL	15
MCP387	mod5	CB4856	0mg/mL	2.5
MCP387	mod5	CB4856	0mg/mL	4.66667
MCP387	mod5	CB4856	0mg/mL	1
MCP387	mod5	CB4856	1.5mg/mL	4.66667
MCP387	mod5	CB4856	1.5mg/mL	2
MCP387	mod5	CB4856	1.5mg/mL	6.66667
MCP387	mod5	CB4856	2.5mg/mL	12.6667
MCP387	mod5	CB4856	2.5mg/mL	5.5
MCP387	mod5	CB4856	2.5mg/mL	10.3333
MCP387	mod5	CB4856	5mg/mL	4
MCP387	mod5	CB4856	5mg/mL	8.5
MCP387	mod5	CB4856	5mg/mL	9.33333
N2	WT	N2	0mg/mL	4.66667
N2	WT	N2	0mg/mL	3.33333
N2	WT	N2	0mg/mL	1.75
N2	WT	N2	1.5mg/mL	5.33333
N2	WT	N2	1.5mg/mL	8.66667
N2	WT	N2	1.5mg/mL	9.33333
N2	WT	N2	2.5mg/mL	4.66667
N2	WT	N2	2.5mg/mL	3
N2	WT	N2	2.5mg/mL	6
N2	WT	N2	5mg/mL	7.66667
N2	WT	N2	5mg/mL	12
N2	WT	N2	5mg/mL	11.3333
QG2873	WT	QG2873	0mg/mL	0
QG2873	WT	QG2873	0mg/mL	0.5
QG2873	WT	QG2873	0mg/mL	1
QG2873	WT	QG2873	1.5mg/mL	2.66667
QG2873	WT	QG2873	1.5mg/mL	4.66667
QG2873	WT	QG2873	1.5mg/mL	7.66667
QG2873	WT	QG2873	2.5mg/mL	5.75
QG2873	WT	QG2873	2.5mg/mL	4.66667
QG2873	WT	QG2873	2.5mg/mL	4.33333
QG2873	WT	QG2873	5mg/mL	6
QG2873	WT	QG2873	5mg/mL	7.66667
QG2873	WT	QG2873	5mg/mL	7.33333
CB4856	WT	CB4856	0mg/mL	1
CB4856	WT	CB4856	0mg/mL	1
CB4856	WT	CB4856	0mg/mL	0.5
CB4856	WT	CB4856	1.5mg/mL	8
CB4856	WT	CB4856	1.5mg/mL	0
CB4856	WT	CB4856	1.5mg/mL	1
CB4856	WT	CB4856	2.5mg/mL	1
CB4856	WT	CB4856	2.5mg/mL	0
CB4856	WT	CB4856	2.5mg/mL	1
CB4856	WT	CB4856	5mg/mL	5
CB4856	WT	CB4856	5mg/mL	2
JU1200	WT	JU1200	0mg/mL	0
JU1200	WT	JU1200	0mg/mL	0
JU1200	WT	JU1200	0mg/mL	0
JU1200	WT	JU1200	1.5mg/mL	0.25
JU1200	WT	JU1200	1.5mg/mL	2.75
JU1200	WT	JU1200	1.5mg/mL	2.66667
JU1200	WT	JU1200	2.5mg/mL	0.5
JU1200	WT	JU1200	2.5mg/mL	3.33333
JU1200	WT	JU1200	2.5mg/mL	5
JU1200	WT	JU1200	5mg/mL	5.66667
JU1200	WT	JU1200	5mg/mL	1
JU1200	WT	JU1200	5mg/mL	3
JU2829	WT	JU2829	0mg/mL	1.33333
JU2829	WT	JU2829	0mg/mL	0.666667
JU2829	WT	JU2829	0mg/mL	1.5
JU2829	WT	JU2829	1.5mg/mL	1.33333
JU2829	WT	JU2829	1.5mg/mL	3
JU2829	WT	JU2829	1.5mg/mL	0.666667
JU2829	WT	JU2829	2.5mg/mL	0
JU2829	WT	JU2829	2.5mg/mL	0.666667
JU2829	WT	JU2829	2.5mg/mL	1.66667
JU2829	WT	JU2829	5mg/mL	0
JU2829	WT	JU2829	5mg/mL	1
JU2829	WT	JU2829	5mg/mL	0
JU3166	WT	JU3166	0mg/mL	3.66667
JU3166	WT	JU3166	0mg/mL	1.66667
JU3166	WT	JU3166	0mg/mL	2.66667
JU3166	WT	JU3166	1.5mg/mL	6
JU3166	WT	JU3166	1.5mg/mL	17
JU3166	WT	JU3166	1.5mg/mL	7
JU3166	WT	JU3166	2.5mg/mL	7.66667
JU3166	WT	JU3166	2.5mg/mL	16
JU3166	WT	JU3166	2.5mg/mL	4.75
JU3166	WT	JU3166	5mg/mL	12.3333
JU3166	WT	JU3166	5mg/mL	15
JU3166	WT	JU3166	5mg/mL	14.3333
JU751	WT	JU751	0mg/mL	0.666667
JU751	WT	JU751	0mg/mL	0.666667
JU751	WT	JU751	0mg/mL	1
JU751	WT	JU751	1.5mg/mL	1.33333
JU751	WT	JU751	1.5mg/mL	0
JU751	WT	JU751	1.5mg/mL	3.66667
JU751	WT	JU751	2.5mg/mL	0.25
JU751	WT	JU751	2.5mg/mL	1.16667
JU751	WT	JU751	2.5mg/mL	2
JU751	WT	JU751	5mg/mL	2
JU751	WT	JU751	5mg/mL	3.75
JU751	WT	JU751	5mg/mL	4.33333
MCP370	mod5	JU751	0mg/mL	5.25
MCP370	mod5	JU751	0mg/mL	3.66667
MCP370	mod5	JU751	0mg/mL	4.66667
MCP370	mod5	JU751	1.5mg/mL	3.66667
MCP370	mod5	JU751	1.5mg/mL	4.33333
MCP370	mod5	JU751	1.5mg/mL	4.33333
MCP370	mod5	JU751	2.5mg/mL	3.66667
MCP370	mod5	JU751	2.5mg/mL	3.33333
MCP370	mod5	JU751	2.5mg/mL	4
MCP370	mod5	JU751	5mg/mL	4.33333
MCP370	mod5	JU751	5mg/mL	1.25
MCP370	mod5	JU751	5mg/mL	1.66667
MCP378	mod5	JU2829	0mg/mL	4
MCP378	mod5	JU2829	0mg/mL	5.66667
MCP378	mod5	JU2829	0mg/mL	3.33333
MCP378	mod5	JU2829	1.5mg/mL	3.66667
MCP378	mod5	JU2829	1.5mg/mL	4
MCP378	mod5	JU2829	1.5mg/mL	3.66667
MCP378	mod5	JU2829	2.5mg/mL	5.25
MCP378	mod5	JU2829	2.5mg/mL	2.5
MCP378	mod5	JU2829	2.5mg/mL	5.66667
MCP378	mod5	JU2829	5mg/mL	0.333333
MCP378	mod5	JU2829	5mg/mL	2.33333
MCP378	mod5	JU2829	5mg/mL	1.66667
MCP380	mod5	QG2873	0mg/mL	3.33333
MCP380	mod5	QG2873	0mg/mL	4.33333
MCP380	mod5	QG2873	1.5mg/mL	6
MCP380	mod5	QG2873	1.5mg/mL	9.66667
MCP380	mod5	QG2873	1.5mg/mL	6
MCP380	mod5	QG2873	2.5mg/mL	9.5
MCP380	mod5	QG2873	2.5mg/mL	7.66667
MCP380	mod5	QG2873	2.5mg/mL	8.66667
MCP380	mod5	QG2873	5mg/mL	9.33333
MCP380	mod5	QG2873	5mg/mL	4
MCP380	mod5	QG2873	5mg/mL	14
MCP381	mod5	JU1200	0mg/mL	0.666667
MCP381	mod5	JU1200	0mg/mL	1
MCP381	mod5	JU1200	0mg/mL	2.25
MCP381	mod5	JU1200	1.5mg/mL	5.66667
MCP381	mod5	JU1200	1.5mg/mL	6.33333
MCP381	mod5	JU1200	1.5mg/mL	5.66667
MCP381	mod5	JU1200	2.5mg/mL	5.66667
MCP381	mod5	JU1200	2.5mg/mL	5.33333
MCP381	mod5	JU1200	2.5mg/mL	3.66667
MCP381	mod5	JU1200	5mg/mL	4
MCP381	mod5	JU1200	5mg/mL	4
MCP381	mod5	JU1200	5mg/mL	5.33333
MCP383	mod5	JU3166	0mg/mL	2.66667
MCP383	mod5	JU3166	0mg/mL	1.25
MCP383	mod5	JU3166	0mg/mL	3.33333
MCP383	mod5	JU3166	1.5mg/mL	10.75
MCP383	mod5	JU3166	1.5mg/mL	10.3333
MCP383	mod5	JU3166	1.5mg/mL	9
MCP383	mod5	JU3166	2.5mg/mL	7.33333
MCP383	mod5	JU3166	2.5mg/mL	7.33333
MCP383	mod5	JU3166	2.5mg/mL	11
MCP383	mod5	JU3166	5mg/mL	11
MCP383	mod5	JU3166	5mg/mL	9.33333
MCP383	mod5	JU3166	5mg/mL	14
MCP387	mod5	CB4856	0mg/mL	0.666667
MCP387	mod5	CB4856	0mg/mL	1
MCP387	mod5	CB4856	0mg/mL	0
MCP387	mod5	CB4856	1.5mg/mL	1.5
MCP387	mod5	CB4856	1.5mg/mL	4
MCP387	mod5	CB4856	1.5mg/mL	9.66667
MCP387	mod5	CB4856	2.5mg/mL	5.33333
MCP387	mod5	CB4856	2.5mg/mL	7.5
MCP387	mod5	CB4856	2.5mg/mL	7.66667
MCP387	mod5	CB4856	5mg/mL	5.66667
MCP387	mod5	CB4856	5mg/mL	5.66667
MCP387	mod5	CB4856	5mg/mL	3.66667
N2	WT	N2	0mg/mL	3.33333
N2	WT	N2	0mg/mL	2.66667
N2	WT	N2	0mg/mL	3
N2	WT	N2	1.5mg/mL	5
N2	WT	N2	1.5mg/mL	6.5
N2	WT	N2	1.5mg/mL	4.25
N2	WT	N2	2.5mg/mL	3.33333
N2	WT	N2	2.5mg/mL	1
N2	WT	N2	2.5mg/mL	9
N2	WT	N2	5mg/mL	6.66667
N2	WT	N2	5mg/mL	4.33333
N2	WT	N2	5mg/mL	4
QG2873	WT	QG2873	0mg/mL	0
QG2873	WT	QG2873	0mg/mL	1
QG2873	WT	QG2873	0mg/mL	1.25
QG2873	WT	QG2873	1.5mg/mL	7.75
QG2873	WT	QG2873	1.5mg/mL	7.25
QG2873	WT	QG2873	1.5mg/mL	7.33333
QG2873	WT	QG2873	2.5mg/mL	9.5
QG2873	WT	QG2873	2.5mg/mL	9
QG2873	WT	QG2873	2.5mg/mL	5.5
QG2873	WT	QG2873	5mg/mL	5
QG2873	WT	QG2873	5mg/mL	8
QG2873	WT	QG2873	5mg/mL	10.6667
