# Supplementary material for: Natural variation in the Caenorhabditis elegans egg-laying circuit modulates an intergenerational fitness trade-off
Source: eLife. 2024 Apr 2;12:RP88253. doi: 10.7554/eLife.88253 (PMC10987095; doi:10.7554/eLife.88253)
Supplement: Figure 8—source data 2. [file elife-88253-fig8-data2.xlsx]

## Sheet: Figure 8B
Term	Df	Sum of squares	F value	Pr(>F)	Sig
State	1	6.26822e+06	175.55	5.84e-36	***
Background	9	6.76875e+06	20.98	1.46e-31	***
State x Background	9	2.03749e+06	5.34	4.34e-07	***
Contrasts
Contrast	Estimate	Se	Df	T-ratio	P-value
mod-5,CB4856 - mod-5,ED3005	-82.65	45.14	709	-1.83	0.955
mod-5,CB4856 - mod-5,JU1200	-208	49.45	709	-4.21	0.00467
mod-5,CB4856 - mod-5,JU2829	-242.31	45.14	709	-5.37	2e-05
mod-5,CB4856 - mod-5,JU3166	-49.4	49.45	709	-1	1
mod-5,CB4856 - mod-5,JU751	-77.25	45.96	709	-1.68	0.981
mod-5,CB4856 - mod-5,JU830	74.53	42.98	709	1.73	0.974
mod-5,CB4856 - mod-5,N2	-158.09	41.58	709	-3.8	0.0218
mod-5,CB4856 - mod-5,QG2873	56.92	49.45	709	1.15	1
mod-5,CB4856 - mod-5,QX1430	-89.35	41.69	709	-2.14	0.833
mod-5,CB4856 - WT,CB4856	292.1	49.45	709	5.91	1.01e-06
mod-5,CB4856 - WT,ED3005	137.8	45.67	709	3.02	0.225
mod-5,CB4856 - WT,JU1200	109.98	49.45	709	2.22	0.785
mod-5,CB4856 - WT,JU2829	-34.34	45.14	709	-0.76	1
mod-5,CB4856 - WT,JU3166	93.88	49.45	709	1.9	0.938
mod-5,CB4856 - WT,N2	-31.25	41.38	709	-0.76	1
mod-5,ED3005 - mod-5,JU3166	33.25	45.14	709	0.74	1
mod-5,ED3005 - mod-5,JU830	157.18	37.94	709	4.14	0.00603
mod-5,ED3005 - mod-5,N2	-75.44	36.35	709	-2.08	0.868
mod-5,ED3005 - mod-5,QX1430	-6.7	36.47	709	-0.18	1
mod-5,ED3005 - WT,CB4856	374.75	45.14	709	8.3	<0,0001
mod-5,ED3005 - WT,JU1200	192.63	45.14	709	4.27	0.00364
mod-5,ED3005 - WT,QG2873	226.49	45.73	709	4.95	0.000164
mod-5,JU1200 - mod-5,JU3166	158.6	49.45	709	3.21	0.14
mod-5,JU1200 - mod-5,N2	49.91	41.58	709	1.2	1
mod-5,JU1200 - mod-5,QX1430	118.65	41.69	709	2.85	0.327
mod-5,JU1200 - WT,JU2829	173.66	45.14	709	3.85	0.0186
mod-5,JU1200 - WT,JU830	330.14	43.14	709	7.65	<0,0001
mod-5,JU1200 - WT,QG2873	351.85	49.99	709	7.04	<0,0001
mod-5,JU1200 - WT,QX1430	341.81	41.48	709	8.24	<0,0001
mod-5,JU2829 - mod-5,JU830	316.84	37.94	709	8.35	<0,0001
mod-5,JU2829 - mod-5,QG2873	299.23	45.14	709	6.63	9.57e-09
mod-5,JU2829 - mod-5,QX1430	152.97	36.47	709	4.19	0.0049
mod-5,JU2829 - WT,CB4856	534.42	45.14	709	11.84	<0,0001
mod-5,JU2829 - WT,ED3005	380.12	40.97	709	9.28	<0,0001
mod-5,JU2829 - WT,JU1200	352.29	45.14	709	7.8	<0,0001
mod-5,JU2829 - WT,JU2829	207.97	40.38	709	5.15	6.13e-05
mod-5,JU2829 - WT,JU3166	336.19	45.14	709	7.45	<0,0001
mod-5,JU2829 - WT,JU751	269.03	40.38	709	6.66	7.06e-09
mod-5,JU2829 - WT,JU830	364.45	38.12	709	9.56	<0,0001
mod-5,JU2829 - WT,N2	211.07	36.12	709	5.84	1.45e-06
mod-5,JU2829 - WT,QG2873	386.16	45.73	709	8.44	<0,0001
mod-5,JU2829 - WT,QX1430	376.12	36.23	709	10.38	<0,0001
mod-5,JU3166 - mod-5,JU751	-27.85	45.96	709	-0.61	1
mod-5,JU3166 - mod-5,JU830	123.93	42.98	709	2.88	0.303
mod-5,JU3166 - mod-5,N2	-108.69	41.58	709	-2.61	0.495
mod-5,JU3166 - mod-5,QG2873	106.31	49.45	709	2.15	0.829
mod-5,JU3166 - mod-5,QX1430	-39.95	41.69	709	-0.96	1
mod-5,JU3166 - WT,CB4856	341.5	49.45	709	6.91	<0,0001
mod-5,JU3166 - WT,ED3005	187.2	45.67	709	4.1	0.00717
mod-5,JU3166 - WT,JU1200	159.38	49.45	709	3.22	0.134
mod-5,JU3166 - WT,JU2829	15.06	45.14	709	0.33	1
mod-5,JU3166 - WT,JU3166	143.27	49.45	709	2.9	0.294
mod-5,JU3166 - WT,JU751	76.11	45.14	709	1.69	0.981
mod-5,JU3166 - WT,JU830	171.54	43.14	709	3.98	0.0115
mod-5,JU3166 - WT,N2	18.15	41.38	709	0.44	1
mod-5,JU3166 - WT,QG2873	193.24	49.99	709	3.87	0.0174
mod-5,JU3166 - WT,QX1430	183.21	41.48	709	4.42	0.00193
mod-5,JU751 - mod-5,JU830	151.78	38.91	709	3.9	0.0152
mod-5,JU751 - mod-5,N2	-80.84	37.35	709	-2.16	0.821
mod-5,JU751 - mod-5,QG2873	134.16	45.96	709	2.92	0.281
mod-5,JU751 - mod-5,QX1430	-12.1	37.47	709	-0.32	1
mod-5,JU751 - WT,CB4856	369.35	45.96	709	8.04	<0,0001
mod-5,JU751 - WT,ED3005	215.05	41.86	709	5.14	6.57e-05
mod-5,JU751 - WT,JU1200	187.23	45.96	709	4.07	0.00791
mod-5,JU751 - WT,JU2829	42.91	41.29	709	1.04	1
mod-5,JU751 - WT,JU3166	171.12	45.96	709	3.72	0.0287
mod-5,JU751 - WT,JU751	103.96	41.29	709	2.52	0.57
mod-5,JU751 - WT,JU830	199.39	39.08	709	5.1	7.84e-05
mod-5,JU751 - WT,N2	46	37.13	709	1.24	1
mod-5,JU751 - WT,QG2873	221.1	46.53	709	4.75	0.000429
mod-5,JU751 - WT,QX1430	211.06	37.24	709	5.67	3.93e-06
mod-5,JU830 - mod-5,N2	-232.62	33.62	709	-6.92	<0,0001
mod-5,JU830 - mod-5,QG2873	-17.62	42.98	709	-0.41	1
mod-5,JU830 - mod-5,QX1430	-163.88	33.75	709	-4.86	0.000263
mod-5,JU830 - WT,CB4856	217.57	42.98	709	5.06	9.56e-05
mod-5,JU830 - WT,ED3005	63.27	38.57	709	1.64	0.986
mod-5,JU830 - WT,JU1200	35.45	42.98	709	0.82	1
mod-5,JU830 - WT,JU2829	-108.87	37.94	709	-2.87	0.312
mod-5,JU830 - WT,JU3166	19.34	42.98	709	0.45	1
mod-5,JU830 - WT,JU751	-47.82	37.94	709	-1.26	0.999
mod-5,JU830 - WT,JU830	47.61	35.53	709	1.34	0.999
mod-5,JU830 - WT,N2	-105.78	33.37	709	-3.17	0.155
mod-5,JU830 - WT,QG2873	69.32	43.59	709	1.59	0.99
mod-5,JU830 - WT,QX1430	59.28	33.49	709	1.77	0.968
mod-5,N2 - mod-5,QG2873	215.01	41.58	709	5.17	5.53e-05
mod-5,N2 - mod-5,QX1430	68.74	31.95	709	2.15	0.828
mod-5,N2 - WT,CB4856	450.19	41.58	709	10.83	<0,0001
mod-5,N2 - WT,ED3005	295.89	37	709	8	<0,0001
mod-5,N2 - WT,JU1200	268.07	41.58	709	6.45	3.67e-08
mod-5,N2 - WT,JU2829	123.75	36.35	709	3.4	0.0803
mod-5,N2 - WT,JU3166	251.96	41.58	709	6.06	4.13e-07
mod-5,N2 - WT,JU751	184.81	36.35	709	5.08	8.57e-05
mod-5,N2 - WT,JU830	280.23	33.82	709	8.29	<0,0001
mod-5,N2 - WT,N2	126.84	31.55	709	4.02	0.00971
mod-5,N2 - WT,QG2873	301.94	42.21	709	7.15	<0,0001
mod-5,N2 - WT,QX1430	291.9	31.68	709	9.22	<0,0001
mod-5,QG2873 - mod-5,QX1430	-146.26	41.69	709	-3.51	0.0584
mod-5,QG2873 - WT,CB4856	235.19	49.45	709	4.76	0.000421
mod-5,QG2873 - WT,ED3005	80.89	45.67	709	1.77	0.968
mod-5,QG2873 - WT,JU1200	53.06	49.45	709	1.07	1
mod-5,QG2873 - WT,JU2829	-91.26	45.14	709	-2.02	0.893
mod-5,QG2873 - WT,JU3166	36.96	49.45	709	0.75	1
mod-5,QG2873 - WT,JU751	-30.2	45.14	709	-0.67	1
mod-5,QG2873 - WT,JU830	65.23	43.14	709	1.51	0.994
mod-5,QG2873 - WT,N2	-88.16	41.38	709	-2.13	0.84
mod-5,QG2873 - WT,QG2873	86.93	49.99	709	1.74	0.973
mod-5,QG2873 - WT,QX1430	76.89	41.48	709	1.85	0.95
mod-5,QX1430 - WT,CB4856	381.45	41.69	709	9.15	<0,0001
mod-5,QX1430 - WT,ED3005	227.15	37.12	709	6.12	2.9e-07
mod-5,QX1430 - WT,JU1200	199.32	41.69	709	4.78	0.000372
mod-5,QX1430 - WT,JU2829	55.01	36.47	709	1.51	0.995
mod-5,QX1430 - WT,JU3166	183.22	41.69	709	4.4	0.00212
mod-5,QX1430 - WT,JU751	116.06	36.47	709	3.18	0.15
mod-5,QX1430 - WT,JU830	211.49	33.95	709	6.23	1.49e-07
mod-5,QX1430 - WT,N2	58.1	31.69	709	1.83	0.955
mod-5,QX1430 - WT,QG2873	233.19	42.32	709	5.51	9.3e-06
mod-5,QX1430 - WT,QX1430	223.16	31.82	709	7.01	<0,0001
WT,CB4856 - WT,ED3005	-154.3	45.67	709	-3.38	0.0867
WT,CB4856 - WT,JU1200	-182.13	49.45	709	-3.68	0.033
WT,CB4856 - WT,JU2829	-326.44	45.14	709	-7.23	<0,0001
WT,CB4856 - WT,JU3166	-198.23	49.45	709	-4.01	0.0102
WT,CB4856 - WT,JU751	-265.39	45.14	709	-5.88	1.19e-06
WT,CB4856 - WT,JU830	-169.96	43.14	709	-3.94	0.0132
WT,CB4856 - WT,N2	-323.35	41.38	709	-7.82	<0,0001
WT,CB4856 - WT,QG2873	-148.26	49.99	709	-2.97	0.253
WT,CB4856 - WT,QX1430	-158.29	41.48	709	-3.82	0.0207
WT,ED3005 - WT,JU1200	-27.82	45.67	709	-0.61	1
WT,ED3005 - WT,JU2829	-172.14	40.97	709	-4.2	0.00475
WT,ED3005 - WT,JU3166	-43.93	45.67	709	-0.96	1
WT,ED3005 - WT,JU751	-111.09	40.97	709	-2.71	0.421
WT,ED3005 - WT,JU830	-15.66	38.74	709	-0.4	1
WT,ED3005 - WT,N2	-169.05	36.77	709	-4.6	0.000872
WT,ED3005 - WT,QG2873	6.05	46.25	709	0.13	1
WT,ED3005 - WT,QX1430	-3.99	36.89	709	-0.11	1
WT,JU1200 - WT,JU2829	-144.32	45.14	709	-3.2	0.144
WT,JU1200 - WT,JU3166	-16.1	49.45	709	-0.33	1
WT,JU1200 - WT,JU751	-83.26	45.14	709	-1.84	0.952
WT,JU1200 - WT,JU830	12.16	43.14	709	0.28	1
WT,JU1200 - WT,N2	-141.23	41.38	709	-3.41	0.0782
WT,JU1200 - WT,QG2873	33.87	49.99	709	0.68	1
WT,JU1200 - WT,QX1430	23.83	41.48	709	0.57	1
WT,JU2829 - WT,JU3166	128.22	45.14	709	2.84	0.331
WT,JU2829 - WT,JU751	61.06	40.38	709	1.51	0.994
WT,JU2829 - WT,JU830	156.48	38.12	709	4.1	0.007
WT,JU2829 - WT,N2	3.09	36.12	709	0.09	1
WT,JU2829 - WT,QG2873	178.19	45.73	709	3.9	0.0155
WT,JU2829 - WT,QX1430	168.15	36.23	709	4.64	0.000714
WT,JU3166 - WT,JU751	-67.16	45.14	709	-1.49	0.995
WT,JU3166 - WT,JU830	28.27	43.14	709	0.66	1
WT,JU3166 - WT,N2	-125.12	41.38	709	-3.02	0.222
WT,JU3166 - WT,QG2873	49.97	49.99	709	1	1
WT,JU3166 - WT,QX1430	39.93	41.48	709	0.96	1
WT,JU751 - WT,JU830	95.43	38.12	709	2.5	0.582
WT,JU751 - WT,N2	-57.96	36.12	709	-1.6	0.989
WT,JU751 - WT,QG2873	117.13	45.73	709	2.56	0.536
WT,JU751 - WT,QX1430	107.09	36.23	709	2.96	0.259
WT,JU830 - WT,N2	-153.39	33.57	709	-4.57	0.000989
WT,JU830 - WT,QG2873	21.71	43.75	709	0.5	1
WT,JU830 - WT,QX1430	11.67	33.7	709	0.35	1
WT,N2 - WT,QG2873	175.09	42.01	709	4.17	0.00545
WT,N2 - WT,QX1430	165.06	31.41	709	5.26	3.59e-05
WT,QG2873 - WT,QX1430	-10.04	42.11	709	-0.24	1

## Sheet: Figure 8 - Figure supplement 1A
Term	Df	Sum sq	F value	Pr(>F)	Sig
State	1	8774.82	0.29	0.592	ns
Background	7	1.37094e+07	277.73	6.93e-181	***
State x Background	7	732094	3.57	0.000899	***
Contrasts
Contrast	Estimate	Se	Df	t-ratio	p-value
mod-5,ED3005 - mod-5,JU2829	431.32	19.69	582	21.9	5.06e-10
mod-5,ED3005 - mod-5,JU3166	101.79	22.02	582	4.62	0.000516
mod-5,ED3005 - mod-5,JU751	392.48	19.43	582	20.2	5.06e-10
mod-5,ED3005 - mod-5,JU830	5.26	18.51	582	0.28	1
mod-5,ED3005 - mod-5,N2	226.21	19.43	582	11.64	5.06e-10
mod-5,ED3005 - mod-5,QG2873	258.17	22.02	582	11.72	5.06e-10
mod-5,ED3005 - mod-5,QX1430	193.76	17.67	582	10.96	5.06e-10
mod-5,ED3005 - WT,ED3005	71.07	19.69	582	3.61	0.029
mod-5,ED3005 - WT,JU2829	452.31	19.69	582	22.97	5.06e-10
mod-5,ED3005 - WT,JU3166	77.85	22.02	582	3.54	0.037
mod-5,ED3005 - WT,JU751	394.53	19.83	582	19.89	5.06e-10
mod-5,ED3005 - WT,JU830	-12.54	18.68	582	-0.67	1
mod-5,ED3005 - WT,N2	169.87	19.69	582	8.63	5.06e-10
mod-5,ED3005 - WT,QG2873	295.62	22.02	582	13.43	5.06e-10
mod-5,ED3005 - WT,QX1430	195.98	17.61	582	11.13	5.06e-10
mod-5,JU2829 - mod-5,JU3166	-329.53	22.02	582	-14.97	5.06e-10
mod-5,JU2829 - mod-5,JU751	-38.84	19.43	582	-2	0.825
mod-5,JU2829 - mod-5,JU830	-426.06	18.51	582	-23.02	5.06e-10
mod-5,JU2829 - mod-5,N2	-205.11	19.43	582	-10.55	5.06e-10
mod-5,JU2829 - mod-5,QG2873	-173.15	22.02	582	-7.86	5.08e-10
mod-5,JU2829 - mod-5,QX1430	-237.56	17.67	582	-13.44	5.06e-10
mod-5,JU2829 - WT,ED3005	-360.25	19.69	582	-18.29	5.06e-10
mod-5,JU2829 - WT,JU2829	20.99	19.69	582	1.07	1
mod-5,JU2829 - WT,JU3166	-353.47	22.02	582	-16.05	5.06e-10
mod-5,JU2829 - WT,JU751	-36.78	19.83	582	-1.85	0.895
mod-5,JU2829 - WT,JU830	-443.86	18.68	582	-23.76	5.06e-10
mod-5,JU2829 - WT,N2	-261.44	19.69	582	-13.28	5.06e-10
mod-5,JU2829 - WT,QG2873	-135.69	22.02	582	-6.16	1.6e-07
mod-5,JU2829 - WT,QX1430	-235.34	17.61	582	-13.36	5.06e-10
mod-5,JU3166 - mod-5,JU751	290.68	21.79	582	13.34	5.06e-10
mod-5,JU3166 - mod-5,JU830	-96.53	20.96	582	-4.6	0.00056
mod-5,JU3166 - mod-5,N2	124.42	21.79	582	5.71	2.12e-06
mod-5,JU3166 - mod-5,QG2873	156.38	24.12	582	6.48	2.34e-08
mod-5,JU3166 - mod-5,QX1430	91.97	20.23	582	4.55	0.000729
mod-5,JU3166 - WT,ED3005	-30.72	22.02	582	-1.4	0.991
mod-5,JU3166 - WT,JU2829	350.51	22.02	582	15.92	5.06e-10
mod-5,JU3166 - WT,JU3166	-23.94	24.12	582	-0.99	1
mod-5,JU3166 - WT,JU751	292.74	22.14	582	13.22	5.06e-10
mod-5,JU3166 - WT,JU830	-114.33	21.12	582	-5.41	1.06e-05
mod-5,JU3166 - WT,N2	68.08	22.02	582	3.09	0.136
mod-5,JU3166 - WT,QG2873	193.83	24.12	582	8.04	5.07e-10
mod-5,JU3166 - WT,QX1430	94.19	20.18	582	4.67	0.000422
mod-5,JU751 - mod-5,JU830	-387.22	18.23	582	-21.24	5.06e-10
mod-5,JU751 - mod-5,N2	-166.26	19.17	582	-8.67	5.06e-10
mod-5,JU751 - mod-5,QG2873	-134.31	21.79	582	-6.17	1.58e-07
mod-5,JU751 - mod-5,QX1430	-198.72	17.38	582	-11.43	5.06e-10
mod-5,JU751 - WT,ED3005	-321.41	19.43	582	-16.54	5.06e-10
mod-5,JU751 - WT,JU2829	59.83	19.43	582	3.08	0.141
mod-5,JU751 - WT,JU3166	-314.62	21.79	582	-14.44	5.06e-10
mod-5,JU751 - WT,JU751	2.06	19.58	582	0.11	1
mod-5,JU751 - WT,JU830	-405.02	18.41	582	-22	5.06e-10
mod-5,JU751 - WT,N2	-222.6	19.43	582	-11.45	5.06e-10
mod-5,JU751 - WT,QG2873	-96.85	21.79	582	-4.45	0.00114
mod-5,JU751 - WT,QX1430	-196.49	17.32	582	-11.34	5.06e-10
mod-5,JU830 - mod-5,N2	220.95	18.23	582	12.12	5.06e-10
mod-5,JU830 - mod-5,QG2873	252.91	20.96	582	12.06	5.06e-10
mod-5,JU830 - mod-5,QX1430	188.5	16.34	582	11.54	5.06e-10
mod-5,JU830 - WT,ED3005	65.81	18.51	582	3.56	0.0346
mod-5,JU830 - WT,JU2829	447.05	18.51	582	24.16	5.06e-10
mod-5,JU830 - WT,JU3166	72.59	20.96	582	3.46	0.0467
mod-5,JU830 - WT,JU751	389.27	18.65	582	20.87	5.06e-10
mod-5,JU830 - WT,JU830	-17.8	17.43	582	-1.02	1
mod-5,JU830 - WT,N2	164.62	18.51	582	8.9	5.06e-10
mod-5,JU830 - WT,QG2873	290.37	20.96	582	13.85	5.06e-10
mod-5,JU830 - WT,QX1430	190.72	16.28	582	11.72	5.06e-10
mod-5,N2 - mod-5,QG2873	31.95	21.79	582	1.47	0.986
mod-5,N2 - mod-5,QX1430	-32.45	17.38	582	-1.87	0.89
mod-5,N2 - WT,ED3005	-155.14	19.43	582	-7.98	5.07e-10
mod-5,N2 - WT,JU2829	226.09	19.43	582	11.63	5.06e-10
mod-5,N2 - WT,JU3166	-148.36	21.79	582	-6.81	3.43e-09
mod-5,N2 - WT,JU751	168.32	19.58	582	8.6	5.06e-10
mod-5,N2 - WT,JU830	-238.75	18.41	582	-12.97	5.06e-10
mod-5,N2 - WT,N2	-56.34	19.43	582	-2.9	0.219
mod-5,N2 - WT,QG2873	69.41	21.79	582	3.19	0.106
mod-5,N2 - WT,QX1430	-30.23	17.32	582	-1.75	0.934
mod-5,QG2873 - mod-5,QX1430	-64.41	20.23	582	-3.18	0.107
mod-5,QG2873 - WT,ED3005	-187.1	22.02	582	-8.5	5.06e-10
mod-5,QG2873 - WT,JU2829	194.14	22.02	582	8.82	5.06e-10
mod-5,QG2873 - WT,JU3166	-180.31	24.12	582	-7.48	5.4e-10
mod-5,QG2873 - WT,JU751	136.37	22.14	582	6.16	1.64e-07
mod-5,QG2873 - WT,JU830	-270.71	21.12	582	-12.82	5.06e-10
mod-5,QG2873 - WT,N2	-88.29	22.02	582	-4.01	0.00681
mod-5,QG2873 - WT,QG2873	37.46	24.12	582	1.55	0.976
mod-5,QG2873 - WT,QX1430	-62.18	20.18	582	-3.08	0.14
mod-5,QX1430 - WT,ED3005	-122.69	17.67	582	-6.94	1.74e-09
mod-5,QX1430 - WT,JU2829	258.55	17.67	582	14.63	5.06e-10
mod-5,QX1430 - WT,JU3166	-115.9	20.23	582	-5.73	1.91e-06
mod-5,QX1430 - WT,JU751	200.78	17.83	582	11.26	5.06e-10
mod-5,QX1430 - WT,JU830	-206.3	16.54	582	-12.48	5.06e-10
mod-5,QX1430 - WT,N2	-23.88	17.67	582	-1.35	0.994
mod-5,QX1430 - WT,QG2873	101.87	20.23	582	5.04	7.32e-05
mod-5,QX1430 - WT,QX1430	2.23	15.32	582	0.15	1
WT,ED3005 - WT,JU2829	381.24	19.69	582	19.36	5.06e-10
WT,ED3005 - WT,JU3166	6.78	22.02	582	0.31	1
WT,ED3005 - WT,JU751	323.47	19.83	582	16.31	5.06e-10
WT,ED3005 - WT,JU830	-83.61	18.68	582	-4.48	0.000998
WT,ED3005 - WT,N2	98.81	19.69	582	5.02	8.02e-05
WT,ED3005 - WT,QG2873	224.56	22.02	582	10.2	5.06e-10
WT,ED3005 - WT,QX1430	124.91	17.61	582	7.09	9.69e-10
WT,JU2829 - WT,JU3166	-374.45	22.02	582	-17.01	5.06e-10
WT,JU2829 - WT,JU751	-57.77	19.83	582	-2.91	0.212
WT,JU2829 - WT,JU830	-464.85	18.68	582	-24.88	5.06e-10
WT,JU2829 - WT,N2	-282.43	19.69	582	-14.34	5.06e-10
WT,JU2829 - WT,QG2873	-156.68	22.02	582	-7.12	9e-10
WT,JU2829 - WT,QX1430	-256.32	17.61	582	-14.55	5.06e-10
WT,JU3166 - WT,JU751	316.68	22.14	582	14.3	5.06e-10
WT,JU3166 - WT,JU830	-90.4	21.12	582	-4.28	0.0023
WT,JU3166 - WT,N2	92.02	22.02	582	4.18	0.00348
WT,JU3166 - WT,QG2873	217.77	24.12	582	9.03	5.06e-10
WT,JU3166 - WT,QX1430	118.13	20.18	582	5.85	9.55e-07
WT,JU751 - WT,JU830	-407.08	18.83	582	-21.62	5.06e-10
WT,JU751 - WT,N2	-224.66	19.83	582	-11.33	5.06e-10
WT,JU751 - WT,QG2873	-98.91	22.14	582	-4.47	0.00104
WT,JU751 - WT,QX1430	-198.55	17.77	582	-11.17	5.06e-10
WT,JU830 - WT,N2	182.42	18.68	582	9.76	5.06e-10
WT,JU830 - WT,QG2873	308.17	21.12	582	14.59	5.06e-10
WT,JU830 - WT,QX1430	208.52	16.48	582	12.66	5.06e-10
WT,N2 - WT,QG2873	125.75	22.02	582	5.71	2.12e-06
WT,N2 - WT,QX1430	26.11	17.61	582	1.48	0.984
WT,QG2873 - WT,QX1430	-99.64	20.18	582	-4.94	0.000118
