# Supplementary material for: Natural variation in the Caenorhabditis elegans egg-laying circuit modulates an intergenerational fitness trade-off
Source: eLife. 2024 Apr 2;12:RP88253. doi: 10.7554/eLife.88253 (PMC10987095; doi:10.7554/eLife.88253)
Supplement: Figure 9—source data 1. [file elife-88253-fig9-data1.xlsx]

## Sheet: Figure 9A and 9B
Class	Strain	Individual	Day1	Day2	Day3	Day4	Total offspring
Class II	CB4856	1	35	187	60	0	282
Class II	CB4856	2	0	66	86	0	152
Class II	CB4856	3	46	148	14	0	208
Class II	CB4856	4	33	0	0	0	33
Class II	CB4856	5	56	178	15	0	249
Class II	CB4856	6	49	177	43	0	269
Class II	CB4856	7	55	178	2	0	235
Class II	CB4856	8	35	170	28	0	233
Class II	CB4856	9	35	173	36	0	244
Class II	CB4856	10	56	173	50	0	279
Class II	CB4856	11	35	122	46	0	203
Class II	CB4856	12	47	138	23	0	208
Class II	CB4856	13	45	142	20	0	207
Class II	CB4856	14	38	132	2	0	172
Class II	CB4856	15	41	171	25	0	237
Class II	CB4856	16	42	169	52	0	263
Class II	CB4856	17	39	159	13	0	211
Class II	CB4856	18	42	173	28	0	243
Class II	CB4856	19	45	164	39	0	248
Class II	CB4856	20	51	173	4	0	228
Class II	CB4856	21	52	149	45	0	246
Class II	CB4856	22	47	160	5	0	212
Class II	CB4856	23	59	169	31	0	259
Class II	CB4856	24	54	173	57	0	284
Class II	CB4856	25	42	158	15	0	215
Class II	CB4856	26	42	155	54	0	251
Class II	CB4856	27	43	163	48	0	254
Class II	CB4856	28	45	146	8	0	199
Class II	CB4856	29	26	138	79	0	243
Class II	CB4856	30	49	164	16	0	229
Class III B	JU2593	1	27	70	0	0	97
Class III B	JU2593	2	35	67	0	0	102
Class III B	JU2593	3	12	44	0	0	56
Class III B	JU2593	4	16	78	0	0	94
Class III B	JU2593	5	26	68	0	0	94
Class III B	JU2593	6	26	46	0	0	72
Class III B	JU2593	7	9	58	40	0	107
Class III B	JU2593	8	8	78	19	0	105
Class III B	JU2593	9	5	18	0	0	23
Class III B	JU2593	10	15	61	31	0	107
Class III B	JU2593	11	12	37	0	0	49
Class III B	JU2593	12	20	57	7	0	84
Class III B	JU2593	13	20	61	0	0	81
Class III B	JU2593	14	36	74	6	0	116
Class III B	JU2593	15	0	73	0	0	73
Class III B	JU2593	16	19	72	0	0	91
Class III B	JU2593	17	18	83	0	0	101
Class III B	JU2593	18	7	53	0	0	60
Class III B	JU2593	19	1	73	0	0	74
Class III B	JU2593	20	0	44	0	0	44
Class III B	JU2593	21	21	94	9	0	124
Class III B	JU2593	22	0	41	0	0	41
Class III B	JU2593	23	12	67	33	0	112
Class III B	JU2593	24	10	54	0	0	64
Class III B	JU2593	25	1	45	0	0	46
Class III B	JU2593	26	0	57	34	0	91
Class III B	JU2593	27	16	78	29	0	123
Class III B	JU2593	28	0	46	0	0	46
Class III B	JU2593	29	0	77	13	0	90
Class III B	JU2593	30	6	65	34	0	105
Class III A	JU830	1	55	124	4	0	183
Class III A	JU830	2	16	15	18	0	49
Class III A	JU830	3	40	122	29	0	191
Class III A	JU830	4	31	131	28	0	190
Class III A	JU830	5	38	125	33	0	196
Class III A	JU830	6	37	97	29	0	163
Class III A	JU830	7	38	126	26	0	190
Class III A	JU830	8	57	119	5	0	181
Class III A	JU830	9	45	142	18	0	205
Class III A	JU830	10	47	0	0	0	47
Class III A	JU830	11	40	142	0	0	182
Class III A	JU830	12	42	110	12	0	164
Class III A	JU830	13	52	147	18	0	217
Class III A	JU830	14	26	139	32	0	197
Class III A	JU830	15	30	111	56	0	197
Class III A	JU830	16	46	146	19	0	211
Class III A	JU830	17	51	128	23	0	202
Class III A	JU830	18	42	115	25	0	182
Class III A	JU830	19	40	150	55	0	245
Class III A	JU830	20	21	154	66	0	241
Class III A	JU830	21	63	143	14	0	220
Class III A	JU830	22	45	120	25	0	190
Class III A	JU830	23	23	117	46	0	186
Class III A	JU830	24	40	104	30	0	174
Class III A	JU830	25	29	117	11	0	157
Class III A	JU830	26	38	124	18	0	180
Class III A	JU830	27	62	130	24	0	216
Class III A	JU830	28	39	124	43	0	206
Class III A	JU830	29	21	101	16	0	138
Class III A	JU830	30	42	87	31	0	160
Class III A	ED3005	1	41	119	39	0	199
Class III A	ED3005	2	52	142	76	0	270
Class III A	ED3005	3	61	163	20	0	244
Class III A	ED3005	4	51	145	16	0	212
Class III A	ED3005	5	48	133	61	0	242
Class III A	ED3005	6	46	130	64	0	240
Class III A	ED3005	7	45	127	43	0	215
Class III A	ED3005	8	23	55	5	0	83
Class III A	ED3005	9	44	127	43	0	214
Class III A	ED3005	10	28	87	15	0	130
Class III A	ED3005	11	59	153	16	0	228
Class III A	ED3005	12	69	138	6	0	213
Class III A	ED3005	13	55	151	69	0	275
Class III A	ED3005	14	55	107	32	0	194
Class III A	ED3005	15	24	108	41	0	173
Class III A	ED3005	16	44	139	84	0	267
Class III A	ED3005	17	43	133	53	0	229
Class III A	ED3005	18	67	130	36	0	233
Class III A	ED3005	19	68	141	46	0	255
Class III A	ED3005	20	31	90	39	0	160
Class III A	ED3005	21	48	50	24	0	122
Class III A	ED3005	22	60	138	28	0	226
Class III A	ED3005	23	40	116	42	0	198
Class III A	ED3005	25	19	55	23	0	97
Class III A	ED3005	26	14	95	44	0	153
Class III A	ED3005	27	41	114	38	0	193
Class III A	ED3005	28	46	101	63	0	210
Class III A	ED3005	29	51	130	30	0	211
Class III A	ED3005	30	65	161	14	0	240
Class II	N2	1	64	176	62	0	302
Class II	N2	2	44	180	41	0	265
Class II	N2	3	47	160	88	0	295
Class II	N2	4	42	173	68	0	283
Class II	N2	5	56	167	85	0	308
Class II	N2	6	33	207	35	0	275
Class II	N2	7	59	185	70	0	314
Class II	N2	8	55	128	54	0	237
Class II	N2	9	43	153	72	0	268
Class II	N2	10	48	193	47	0	288
Class II	N2	11	25	102	44	0	171
Class II	N2	12	30	139	6	0	175
Class II	N2	13	60	179	1	0	240
Class II	N2	14	44	188	44	0	276
Class II	N2	15	42	190	101	0	333
Class II	N2	16	59	184	54	0	297
Class II	N2	17	49	184	61	0	294
Class II	N2	18	46	178	79	0	303
Class II	N2	19	19	185	41	0	245
Class II	N2	20	64	200	55	0	319
Class II	N2	21	48	176	70	0	294
Class II	N2	22	60	142	28	0	230
Class II	N2	23	42	179	69	0	290
Class II	N2	24	36	189	28	0	253
Class II	N2	25	39	186	98	0	323
Class II	N2	26	59	178	49	0	286
Class II	N2	27	54	171	51	0	276
Class II	N2	28	55	193	97	0	345
Class II	N2	29	54	181	78	0	313
Class II	N2	30	58	188	61	0	307
Class III B	JU751	1	44	149	44	0	237
Class III B	JU751	2	44	121	11	0	176
Class III B	JU751	3	46	142	34	0	222
Class III B	JU751	4	35	143	41	0	219
Class III B	JU751	5	30	106	59	0	195
Class III B	JU751	6	36	133	46	0	215
Class III B	JU751	7	31	111	42	0	184
Class III B	JU751	8	28	46	8	0	82
Class III B	JU751	9	41	135	19	0	195
Class III B	JU751	10	23	113	38	0	174
Class III B	JU751	11	26	164	33	0	223
Class III B	JU751	12	21	132	28	0	181
Class III B	JU751	13	33	130	43	0	206
Class III B	JU751	14	23	60	20	0	103
Class III B	JU751	15	19	135	19	0	173
Class III B	JU751	16	41	100	32	0	173
Class III B	JU751	17	48	121	15	0	184
Class III B	JU751	18	51	106	0	0	157
Class III B	JU751	19	31	131	51	0	213
Class III B	JU751	20	46	136	32	0	214
Class III B	JU751	21	29	122	52	0	203
Class III B	JU751	22	33	122	33	0	188
Class III B	JU751	23	26	120	34	0	180
Class III B	JU751	24	22	123	48	0	193
Class III B	JU751	25	27	152	0	0	179
Class III B	JU751	26	43	129	37	0	209
Class III B	JU751	27	21	118	57	0	196
Class III B	JU751	28	27	110	27	0	164
Class III B	JU751	29	30	141	22	0	193
Class III B	JU751	30	32	156	45	0	233
Class III A	JU440	1	34	139	79	0	252
Class III A	JU440	2	41	121	39	0	201
Class III A	JU440	3	20	114	96	0	230
Class III A	JU440	4	40	163	64	0	267
Class III A	JU440	5	26	137	72	0	235
Class III A	JU440	6	53	159	27	0	239
Class III A	JU440	7	29	109	59	0	197
Class III A	JU440	8	50	137	63	0	250
Class III A	JU440	9	49	151	73	0	273
Class III A	JU440	10	44	136	49	0	229
Class III A	JU440	11	44	135	9	0	188
Class III A	JU440	13	6	65	21	0	92
Class III A	JU440	14	49	131	50	0	230
Class III A	JU440	15	45	148	33	0	226
Class III A	JU440	16	60	145	35	0	240
Class III A	JU440	17	15	121	1	0	137
Class III A	JU440	18	48	143	41	0	232
Class III A	JU440	19	57	149	32	0	238
Class III A	JU440	20	36	184	8	0	228
Class III A	JU440	22	34	148	44	0	226
Class III A	JU440	23	54	143	33	0	230
Class III A	JU440	24	25	114	19	0	158
Class III A	JU440	25	54	135	35	0	224
Class III A	JU440	26	25	134	49	0	208
Class III A	JU440	27	28	136	67	0	231
Class III A	JU440	28	42	154	27	0	223
Class III A	JU440	29	24	134	92	0	250
Class III A	JU440	30	34	143	10	0	187
Class II	JU1200	1	29	173	41	0	243
Class II	JU1200	2	44	192	32	0	268
Class II	JU1200	3	57	169	34	0	260
Class II	JU1200	4	56	191	30	0	277
Class II	JU1200	5	56	185	21	0	262
Class II	JU1200	6	47	173	21	0	241
Class II	JU1200	7	33	152	28	0	213
Class II	JU1200	8	42	154	40	0	236
Class II	JU1200	9	48	169	41	0	258
Class II	JU1200	10	49	141	38	0	228
Class II	JU1200	11	44	158	12	0	214
Class II	JU1200	12	38	174	29	0	241
Class II	JU1200	13	47	171	19	0	237
Class II	JU1200	14	52	160	24	0	236
Class II	JU1200	15	26	149	8	0	183
Class II	JU1200	16	43	162	53	0	258
Class II	JU1200	17	46	148	42	0	236
Class II	JU1200	18	51	152	30	0	233
Class II	JU1200	19	55	150	26	0	231
Class II	JU1200	20	56	173	42	0	271
Class II	JU1200	21	66	173	21	0	260
Class II	JU1200	22	48	167	22	0	237
Class II	JU1200	23	52	150	14	0	216
Class II	JU1200	24	42	174	21	0	237
Class II	JU1200	25	49	165	78	0	292
Class II	JU1200	26	37	143	59	0	239
Class II	JU1200	27	62	126	37	0	225
Class II	JU1200	28	57	179	42	0	278
Class II	JU1200	29	38	157	38	0	233
Class II	JU1200	30	45	168	24	0	237
Class III B	NIC1832	1	36	96	10	0	142
Class III B	NIC1832	2	38	76	0	0	114
Class III B	NIC1832	3	28	89	6	0	123
Class III B	NIC1832	4	37	89	13	0	139
Class III B	NIC1832	5	52	87	20	0	159
Class III B	NIC1832	6	27	90	23	0	140
Class III B	NIC1832	7	35	78	4	0	117
Class III B	NIC1832	8	35	91	5	0	131
Class III B	NIC1832	9	42	75	8	0	125
Class III B	NIC1832	10	42	69	4	0	115
Class III B	NIC1832	11	33	119	6	0	158
Class III B	NIC1832	12	24	146	13	0	183
Class III B	NIC1832	13	26	113	27	0	166
Class III B	NIC1832	14	28	93	21	0	142
Class III B	NIC1832	15	50	95	6	0	151
Class III B	NIC1832	16	41	85	6	0	132
Class III B	NIC1832	17	36	118	17	0	171
Class III B	NIC1832	18	51	89	6	0	146
Class III B	NIC1832	19	24	97	7	0	128
Class III B	NIC1832	20	39	88	9	0	136
Class III B	NIC1832	21	49	130	10	0	189
Class III B	NIC1832	22	51	75	6	0	132
Class III B	NIC1832	23	34	113	6	0	153
Class III B	NIC1832	24	37	75	14	0	126
Class III B	NIC1832	25	49	86	9	0	144
Class III B	NIC1832	26	36	80	12	0	128
Class III B	NIC1832	27	40	63	11	0	114
Class III B	NIC1832	28	48	88	14	0	150
Class III B	NIC1832	29	51	82	7	0	140
Class III B	NIC1832	30	11	40	14	0	65
Class I	JU3166	1	51	204	9	0	264
Class I	JU3166	2	54	206	17	0	277
Class I	JU3166	3	68	222	21	0	311
Class I	JU3166	4	54	207	36	0	297
Class I	JU3166	5	40	206	39	0	285
Class I	JU3166	6	29	183	9	0	221
Class I	JU3166	7	47	189	31	0	267
Class I	JU3166	8	40	203	27	0	270
Class I	JU3166	9	70	187	9	0	266
Class I	JU3166	10	46	181	39	0	266
Class I	JU3166	11	42	195	57	0	294
Class I	JU3166	12	64	176	6	0	246
Class I	JU3166	13	114	174	2	0	290
Class I	JU3166	14	33	213	16	0	262
Class I	JU3166	15	36	225	20	0	281
Class I	JU3166	16	39	189	43	0	271
Class I	JU3166	17	41	195	49	0	285
Class I	JU3166	18	34	196	60	0	290
Class I	JU3166	19	50	220	30	0	300
Class I	JU3166	20	61	194	59	0	314
Class I	JU3166	21	66	183	34	0	283
Class I	JU3166	22	55	206	54	0	315
Class I	JU3166	23	46	195	41	0	282
Class I	JU3166	24	34	168	23	0	225
Class I	JU3166	25	41	194	7	0	242
Class I	JU3166	26	39	67	0	0	106
Class I	JU3166	27	49	191	7	0	247
Class I	JU3166	28	28	147	69	0	244
Class I	JU3166	29	54	155	52	0	261
Class I	JU3166	30	62	183	26	0	271
Class II	QX1430	1	50	157	24	0	231
Class II	QX1430	2	54	152	26	0	232
Class II	QX1430	3	45	149	39	0	233
Class II	QX1430	4	57	149	19	0	225
Class II	QX1430	5	55	139	14	0	208
Class II	QX1430	6	47	128	22	0	197
Class II	QX1430	7	48	158	9	0	215
Class II	QX1430	8	39	137	66	1	243
Class II	QX1430	9	51	144	35	0	230
Class II	QX1430	10	44	167	43	0	254
Class II	QX1430	11	58	87	17	0	162
Class II	QX1430	12	38	153	70	0	261
Class II	QX1430	13	35	125	70	0	230
Class II	QX1430	14	34	151	25	0	210
Class II	QX1430	15	47	172	65	0	284
Class II	QX1430	16	50	169	47	0	266
Class II	QX1430	17	49	147	45	2	243
Class II	QX1430	18	58	162	60	0	280
Class II	QX1430	19	26	119	64	31	240
Class II	QX1430	20	59	153	33	0	245
Class II	QX1430	21	48	150	15	0	213
Class II	QX1430	22	56	157	41	0	254
Class II	QX1430	23	40	130	31	0	201
Class II	QX1430	24	41	185	28	0	254
Class II	QX1430	25	49	136	35	0	220
Class II	QX1430	26	35	134	34	0	203
Class II	QX1430	27	46	146	47	0	239
Class II	QX1430	28	42	141	56	2	241
Class II	QX1430	29	41	151	62	0	254
Class II	QX1430	30	53	150	22	0	225
Class III A	JU2829	1	49	121	29	0	199
Class III A	JU2829	2	35	97	29	0	161
Class III A	JU2829	3	35	113	44	0	192
Class III A	JU2829	4	46	104	23	0	173
Class III A	JU2829	5	29	81	30	0	140
Class III A	JU2829	6	52	129	17	0	198
Class III A	JU2829	7
Class III A	JU2829	8	37	141	23	0	201
Class III A	JU2829	9	30	114	43	0	187
Class III A	JU2829	10	43	121	19	0	183
Class III A	JU2829	11	28	127	43	0	198
Class III A	JU2829	12	47	109	8	0	164
Class III A	JU2829	13	39	105	47	0	191
Class III A	JU2829	14	20	90	58	0	168
Class III A	JU2829	15	38	108	17	0	163
Class III A	JU2829	16	41	120	23	0	184
Class III A	JU2829	17	30	108	15	0	153
Class III A	JU2829	18	55	112	21	0	188
Class III A	JU2829	19	51	125	30	0	206
Class III A	JU2829	20	47	148	53	0	248
Class III A	JU2829	21	40	81	40	0	161
Class III A	JU2829	23	40	125	40	0	205
Class III A	JU2829	24	21	118	25	0	164
Class III A	JU2829	25	54	135	29	0	218
Class III A	JU2829	26	20	91	12	0	123
Class III A	JU2829	27	39	111	20	0	170
Class III A	JU2829	28	35	103	8	0	146
Class III A	JU2829	29	48	142	25	0	215
Class III A	JU2829	30	21	78	31	0	130
Class III A	NIC1786	1	52	163	38	0	253
Class III A	NIC1786	2	38	121	30	0	189
Class III A	NIC1786	3	32	107	39	0	178
Class III A	NIC1786	4	29	126	27	0	182
Class III A	NIC1786	5	24	155	52	0	231
Class III A	NIC1786	6	48	138	52	0	238
Class III A	NIC1786	7	49	143	23	0	215
Class III A	NIC1786	8	53	157	48	0	258
Class III A	NIC1786	9	42	146	47	0	235
Class III A	NIC1786	10	32	137	40	0	209
Class III A	NIC1786	11	36	142	34	0	212
Class III A	NIC1786	12	38	147	35	0	220
Class III A	NIC1786	13	46	129	36	0	211
Class III A	NIC1786	14	38	100	62	0	200
Class III A	NIC1786	15	40	129	21	0	190
Class III A	NIC1786	16	52	138	36	0	226
Class III A	NIC1786	17	43	143	25	0	211
Class III A	NIC1786	18	38	154	49	0	241
Class III A	NIC1786	19	45	144	11	0	200
Class III A	NIC1786	20	53	142	34	0	229
Class III A	NIC1786	21	34	160	14	0	208
Class III A	NIC1786	22	25	97	78	0	200
Class III A	NIC1786	23	45	149	17	0	211
Class III A	NIC1786	24	47	159	46	0	252
Class III A	NIC1786	25	53	146	49	0	248
Class III A	NIC1786	26	42	141	21	0	204
Class III A	NIC1786	27	45	139	51	0	235
Class III A	NIC1786	28	33	147	53	0	233
Class III A	NIC1786	29	45	143	53	0	241
Class III A	NIC1786	30	42	128	45	0	215
Class III B	JU2587	1	42	102	13	0	157
Class III B	JU2587	2	29	101	34	0	164
Class III B	JU2587	3	44	128	16	0	188
Class III B	JU2587	4	26	113	37	0	176
Class III B	JU2587	5	45	79	0	0	124
Class III B	JU2587	6	35	104	33	0	172
Class III B	JU2587	7	41	97	13	0	151
Class III B	JU2587	8	43	126	35	0	204
Class III B	JU2587	9	24	124	55	0	203
Class III B	JU2587	10	44	103	37	0	184
Class III B	JU2587	11	55	80	20	0	155
Class III B	JU2587	12	0	19	5	0	24
Class III B	JU2587	13	41	91	18	0	150
Class III B	JU2587	14	43	139	25	0	207
Class III B	JU2587	15	40	124	32	0	196
Class III B	JU2587	16	39	100	22	0	161
Class III B	JU2587	17	48	117	22	0	187
Class III B	JU2587	18	52	120	50	0	222
Class III B	JU2587	19	56	122	17	0	195
Class III B	JU2587	20	34	116	50	0	200
Class III B	JU2587	22	38	112	20	0	170
Class III B	JU2587	23	40	118	33	0	191
Class III B	JU2587	24	30	85	21	0	136
Class III B	JU2587	25	29	101	43	0	173
Class III B	JU2587	26	51	105	38	0	194
Class III B	JU2587	27	50	128	33	0	211
Class III B	JU2587	28	50	125	37	0	212
Class III B	JU2587	29	53	129	34	0	216
Class III B	JU2587	30	33	101	35	0	169
Class I	QG2873	1	38	146	92	0	276
Class I	QG2873	2	54	156	58	0	268
Class I	QG2873	3	53	166	40	0	259
Class I	QG2873	4	49	183	21	0	253
Class I	QG2873	5	46	155	37	0	238
Class I	QG2873	6	28	135	69	0	232
Class I	QG2873	7	47	156	74	0	277
Class I	QG2873	8	51	149	18	0	218
Class I	QG2873	9	50	131	3	0	184
Class I	QG2873	11	62	148	29	0	239
Class I	QG2873	12	53	157	37	0	247
Class I	QG2873	13	60	165	95	0	320
Class I	QG2873	14	46	151	40	0	237
Class I	QG2873	15	57	138	37	0	232
Class I	QG2873	16	45	169	37	0	251
Class I	QG2873	17	57	151	28	0	236
Class I	QG2873	18	52	151	12	0	215
Class I	QG2873	19	53	164	48	0	265
Class I	QG2873	20	53	174	48	0	275
Class I	QG2873	21	52	169	41	0	262
Class I	QG2873	22	19	94	51	0	164
Class I	QG2873	23	59	166	71	0	296
Class I	QG2873	24	44	162	68	0	274
Class I	QG2873	25	51	166	43	0	260
Class I	QG2873	26	45	182	53	0	280
Class I	QG2873	27	43	149	63	0	255
Class I	QG2873	28	56	168	32	0	256
Class I	QG2873	29	9	79	52	0	140
Class I	QG2873	30	45	163	25	0	233

## Sheet: Figure 9C
Class	Strain	Mean egg retention	Mean lifetime offspring
Class II	N2	12.4103	280.2
Class III A	JU2829	24.6	179.6
Class II	QX1430	9.75	233.1
Class III B	JU2593	40.9	82.4
Class III B	NIC1832	29.6	138.6
Class III B	JU2587	34.3	175.6
Class II	CB4856	8.8	226.5
Class III A	JU440	15.7	218.6
Class II	JU1200	12.025	242.7
Class III A	ED3005	22.35	204.3
Class I	QG2873	4.975	246.3
Class III A	JU830	38.65	182
Class III A	NIC1786	15.8889	219.2
Class III B	JU751	41.125	188.8
Class I	JU3166	6.5	267.8
