# Supplementary material for: Natural variation in the Caenorhabditis elegans egg-laying circuit modulates an intergenerational fitness trade-off
Source: eLife. 2024 Apr 2;12:RP88253. doi: 10.7554/eLife.88253 (PMC10987095; doi:10.7554/eLife.88253)
Supplement: Figure 10—source data 1. [file elife-88253-fig10-data1.xlsx]

## Sheet: Figure 10A
Class	Strain	Mean egg retention	Mean percentage of live animals (day 5)
Class II	N2	12.4103	89.2361
Class III A	JU2829	24.6	47.619
Class II	QX1430	9.75	78.3333
Class III B	JU2593	40.9	8.21068
Class III B	NIC1832	29.6	18.9611
Class III B	JU2587	34.3	26.6667
Class II	CB4856	8.8	67.5
Class III A	JU440	15.7	73.3333
Class II	JU1200	12.025	77.8187
Class III A	ED3005	22.35	76.5972
Class I	QG2873	4.975	87.7778
Class III A	JU830	38.65	50
Class III A	NIC1786	15.8889	74.4444
Class III B	JU751	41.125	20.8244
Class I	JU3166	6.5	95.5556

## Sheet: Figure 10B
			N initial	N survivors	N survivors	N survivors	N survivors	N survivors	N survivors	N survivors
Class	Strain	Replicate	Day 0	Day1	Day2	Day3	Day4	Day5	Day7	Day8
Class III A	JU2829	1	30	27	27	22	19	11	8	6
Class III A	JU2829	2	35	35	30	28	21	15	12	9
Class III A	JU2829	3	30	29	26	23	21	19	16	9
Class III A	JU440	1	30	29	28	28	23	20	18	17
Class III A	JU440	2	30	28	28	26	22	21	21	19
Class III A	JU440	3	30	29	27	27	26	25	21	18
Class III B	JU751	1	30	29	26	12	4	5	4	4
Class III B	JU751	2	30	23	20	10	5	6	4	3
Class III B	JU751	3	31	28	25	12	7	8	7	7
Class II	N2	1	32	30	30	30	30	27	25	20
Class II	N2	2	30	29	29	29	28	27	26	21
Class II	N2	3	30	29	29	28	28	28	26	26
Class II	QX1430	1	30	30	28	27	27	23	21	20
Class II	QX1430	2	30	26	26	26	26	24	22	21
Class III A	NIC1786	1	30	30	27	26	25	24	22	20
Class III A	NIC1786	2	30	28	27	26	24	20	17	14
Class III A	NIC1786	3	30	30	30	27	25	23	20	18
Class II	CB4856	1	30	28	27	27	24	22	20	17
Class II	CB4856	2	30	26	23	23	23	20	18	16
Class II	CB4856	3	32	29	28	27	22	20	17	16
Class III A	JU830	1	30	28	28	27	16	15	14	14
Class III A	JU830	2	30	26	25	23	13	14	13	9
Class III A	JU830	3	30	30	30	25	17	16	14	11
Class III B	JU2593	1	35	34	20	5	4	3	3	3
Class III B	JU2593	2	33	25	19	2	3	2	2	2
Class III B	JU2593	3	30	29	16	6	3	3	3	3
Class II	JU1200	1	31	30	30	30	28	26	21	18
Class II	JU1200	2	35	35	35	35	32	23	21	15
Class II	JU1200	3	31	31	31	31	29	26	23	23
Class III B	NIC1832	1	32	26	26	17	10	9	3	3
Class III B	NIC1832	2	36	34	33	24	8	4	4	2
Class III B	NIC1832	3	34	31	29	21	11	6	5	3
Class III B	JU2587	1	30	29	26	20	13	12	8	4
Class III B	JU2587	2	30	29	28	19	9	5	4	4
Class III B	JU2587	3	30	28	26	13	9	7	4	7
Class III A	ED3005	1	32	32	32	31	29	25	21	21
Class III A	ED3005	2	32	32	31	30	25	24	23	23
Class III A	ED3005	3	30	28	27	26	23	23	23	22
Class I	JU3166	1	30	29	29	29	29	29	27	20
Class I	JU3166	2	30	30	30	29	28	28	26	22
Class I	JU3166	3	30	30	30	30	30	29	25	21
Class I	QG2873	1	30	30	30	29	29	25	25	22
Class I	QG2873	2	30	30	30	30	28	26	24	19
Class I	QG2873	3	30	30	30	30	29	28	23	21

## Sheet: Figure 10C
				Number of dead animals with internally hatched larvae
Class	strain	Replicate	N animals day 0	Dead bag at Day1	Day2	Day3	Day4	Day5	Day7	Day8	Day9	Day9 cumul	Day9 cumul percentage
Class III A	JU2829	1	30	0	0	2	0	1	1	0	0	4	13.3333
Class III A	JU2829	2	35	0	0	0	5	0	0	0	0	5	14.2857
Class III A	JU2829	3	30	0	0	0	0	0	0	0	0	0	0
Class III A	JU440	1	30	0	0	0	5	1	1	0	0	7	23.3333
Class III A	JU440	2	30	0	0	0	1	2	0	0	0	3	10
Class III A	JU440	3	30	0	0	0	1	1	1	0	0	3	10
Class III B	JU751	1	30	0	0	9	6	0	1	0	0	16	53.3333
Class III B	JU751	2	30	0	0	8	4	0	0	0	0	12	40
Class III B	JU751	3	31	0	0	10	3	0	0	0	0	13	41.9355
Class II	N2	1	32	0	0	0	0	0	0	0	0	0	0
Class II	N2	2	30	0	0	0	0	0	0	0	0	0	0
Class II	N2	3	30	0	0	0	0	0	0	0	0	0	0
Class II	QX1430	1	30	0	0	0	0	0	0	0	0	0	0
Class II	QX1430	2	30	0	0	0	0	0	0	0	0	0	0
Class III A	NIC1786	1	30	0	0	0	0	0	0	0	0	0	0
Class III A	NIC1786	2	30	0	0	0	1	2	0	0	0	3	10
Class III A	NIC1786	3	30	0	0	0	0	0	0	0	0	0	0
Class II	CB4856	1	30	0	0	0	1	0	0	0	0	1	3.33333
Class II	CB4856	2	30	0	0	0	0	0	0	0	0	0	0
Class II	CB4856	3	32	0	0	1	0	0	0	0	0	1	3.125
Class III A	JU830	1	30	0	0	0	6	0	0	0	0	6	20
Class III A	JU830	2	30	0	0	0	4	0	0	0	0	4	13.3333
Class III A	JU830	3	30	0	0	4	2	0	0	0	0	6	20
Class III B	JU2593	1	35	0	5	11	1	0	0	0	0	17	48.5714
Class III B	JU2593	2	33	0	6	10	0	1	0	0	0	17	51.5152
Class III B	JU2593	3	30	0	0	8	1	0	0	0	0	9	30
Class II	JU1200	1	31	0	0	0	0	0	0	0	0	0	0
Class II	JU1200	2	35	0	0	0	1	1	0	1	0	3	8.57143
Class II	JU1200	3	31	0	0	0	1	0	0	0	0	1	3.22581
Class III B	NIC1832	1	32	0	0	7	6	2	0	0	0	15	46.875
Class III B	NIC1832	2	36	0	1	7	9	1	0	1	0	19	52.7778
Class III B	NIC1832	3	34	0	1	8	6	2	0	1	0	18	52.9412
Class III B	JU2587	1	30	0	1	6	4	1	1	0	0	13	43.3333
Class III B	JU2587	2	30	0	0	7	6	3	0	0	1	17	56.6667
Class III B	JU2587	3	30	0	2	13	3	1	0	0	0	19	63.3333
Class III A	ED3005	1	32	0	0	1	1	1	0	0	0	3	9.375
Class III A	ED3005	2	32	0	0	0	3	0	0	0	1	4	12.5
Class III A	ED3005	3	30	0	0	1	1	0	0	0	0	2	6.66667
Class I	JU3166	1	30	0	0	0	0	0	0	0	0	0	0
Class I	JU3166	2	30	0	0	0	0	0	0	0	0	0	0
Class I	JU3166	3	30	0	0	0	0	0	0	0	0	0	0
Class I	QG2873	1	30	0	0	0	0	0	0	0	0	0	0
Class I	QG2873	2	30	0	0	0	0	0	0	0	0	0	0
Class I	QG2873	3	30	0	0	0	0	0	0	0	0	0	0
