# Supplementary material for: Natural variation in the Caenorhabditis elegans egg-laying circuit modulates an intergenerational fitness trade-off
Source: eLife. 2024 Apr 2;12:RP88253. doi: 10.7554/eLife.88253 (PMC10987095; doi:10.7554/eLife.88253)
Supplement: Figure 11—figure supplement 1—source data 1. [file elife-88253-fig11-figsupp1-data1.xlsx]

## Sheet: Figure 11-supplement 1A
SPERM					OFFSPRING
Strain	Individual	Total sperm number			Strain	Individual	Day1	Day2+3	Total offspring
JU2593	1	312			JU2593	20	47	92	139
JU2593	2	356			JU2593	21	32	103	135
JU2593	3	272			JU2593	22	30	105	135
JU2593	4	274			JU2593	23	34	69	103
JU2593	5	254			JU2593	24	23	95	118
JU2593	6	292			JU2593	25	34	56	90
JU2593	7	320			JU2593	26	37	102	139
JU2593	8	260			JU2593	27	31	79	110
JU2593	9	256			JU2593	28	33	97	130
JU2593	10	304			JU2593	29	43	123	166
JU2593	11	268			JU2593	30	23	110	133
JU2593	12	252			JU2593	31	22	94	116
JU2593	13	276			JU2593	32	23	88	111
JU2593	14	262			JU2593	33	5	64	69
JU2593	15	262			JU2593	34	52	124	176
JU2593	16	258			JU2593	35	30	89	119
JU2593	17	246			JU2593	36	20	70	90
JU2593	18	238			JU2593	37	39	86	125
JU2593	19	260			JU2593	38	31	103	134
					JU2593	39	47	96	143

## Sheet: Figure 11-supplement 1B
Strain	Dev stage	Individual	Number of internal larvae	Damaged gonad/germline (Y=YES, N=NO)
JU2593	L4+48h	1	0	N
JU2593	L4+48h	2	0	N
JU2593	L4+48h	3	0	N
JU2593	L4+48h	4	0	N
JU2593	L4+48h	5	8	N
JU2593	L4+48h	6	0	N
JU2593	L4+48h	7	0	N
JU2593	L4+48h	8	2	N
JU2593	L4+48h	9	0	N
JU2593	L4+48h	10	0	N
JU2593	L4+48h	11	0	N
JU2593	L4+48h	12	0	N
JU2593	L4+48h	13	0	N
JU2593	L4+48h	14	0	N
JU2593	L4+48h	15	0	N
JU2593	L4+48h	16	0	N
JU2593	L4+48h	17	1	N
JU2593	L4+48h	18	0	N
JU2593	L4+48h	19	3	N
JU2593	L4+48h	20	0	N
JU2593	L4+48h	21	0	N
JU2593	L4+48h	22	0	N
JU2593	L4+48h	23	9	N
JU2593	L4+48h	24	0	N
JU2593	L4+48h	25	4	N
JU2593	L4+48h	26	3	N
JU2593	L4+48h	27	0	N
JU2593	L4+48h	28	8	Y
JU2593	L4+48h	29	2	N
JU2593	L4+48h	30	5	Y
JU2593	L4+48h	31	2	N
JU2593	L4+48h	32	3	N
JU2593	L4+48h	33	1	N
JU2593	L4+48h	34	0	N
JU2593	L4+48h	35	4	Y
JU2593	L4+48h	36	3	N
JU2593	L4+48h	37	3	N
JU2593	L4+48h	38	1	N
JU2593	L4+48h	39	0	N
JU2593	L4+48h	40	0	N
JU2593	L4+48h	41	8	Y
JU2593	L4+48h	42	3	N
JU2593	L4+48h	43	9	Y
JU2593	L4+48h	44	14	N
JU2593	L4+48h	45	0	N
JU2593	L4+48h	46	0	N
JU2593	L4+48h	47	23	Y
JU2593	L4+48h	48	0	N
JU2593	L4+48h	49	0	N
JU2593	L4+48h	50	5	N
JU2593	L4+48h	51	0	N
JU2593	L4+48h	52	12	Y
JU2593	L4+48h	53	15	Y
JU2593	L4+48h	54	0	N
JU2593	L4+48h	55	38	Y
JU2593	L4+48h	56	5	N
JU2593	L4+48h	57	38	N
JU2593	L4+48h	58	0	N
JU2593	L4+48h	59	0	N
JU2593	L4+48h	60	0	N
JU2593	L4+40h	1	0	N
JU2593	L4+40h	2	0	N
JU2593	L4+40h	3	1	N
JU2593	L4+40h	4	8	N
JU2593	L4+40h	5	0	N
JU2593	L4+40h	6	1	N
JU2593	L4+40h	7	0	N
JU2593	L4+40h	8	0	N
JU2593	L4+40h	9	0	N
JU2593	L4+40h	10	0	N
JU2593	L4+40h	11	0	N
JU2593	L4+40h	12	5	N
JU2593	L4+40h	13	0	N
JU2593	L4+40h	14	0	N
JU2593	L4+40h	15	0	N
JU2593	L4+40h	16	0	N
JU2593	L4+40h	17	13	Y
JU2593	L4+40h	18	0	N
JU2593	L4+40h	19	0	N
JU2593	L4+40h	20	3	N
JU2593	L4+40h	21	14	Y
JU2593	L4+40h	22	0	N
JU2593	L4+40h	23	0	N
JU2593	L4+40h	24	5	N
JU2593	L4+40h	25	0	N
JU2593	L4+40h	26	0	N
JU2593	L4+40h	27	0	N
JU2593	L4+40h	28	0	N
JU2593	L4+40h	29	0	N
JU2593	L4+40h	30	0	N
JU2593	L4+40h	31	7	Y
JU2593	L4+40h	32	0	N
JU2593	L4+40h	33	0	N
JU2593	L4+40h	34	0	N
JU2593	L4+40h	35	11	Y
JU2593	L4+40h	36	0	N
JU2593	L4+40h	37	16	Y
JU2593	L4+40h	38	0	N
JU2593	L4+40h	39	0	N
JU2593	L4+40h	40	0	N
JU2593	L4+40h	41	0	N
JU2593	L4+40h	42	0	N
JU2593	L4+40h	43	0	N
JU2593	L4+40h	44	0	N
JU2593	L4+40h	45	0	N

## Sheet: Figure 11-supplement 1C and D
Class	Strain	Time	Individual	Number of sperm	Number of unfertilized oocytes in utero
Class II	N2	L4+48H	1	61	0
Class II	N2	L4+48H	2	110	0
Class II	N2	L4+48H	3	97	0
Class II	N2	L4+48H	4	75	0
Class II	N2	L4+48H	5	35	0
Class II	N2	L4+48H	6	99	0
Class II	N2	L4+48H	7	77	0
Class II	N2	L4+48H	8	45	0
Class II	N2	L4+48H	9	91	0
Class II	N2	L4+48H	10	77	0
Class II	N2	L4+48H	11	80	0
Class II	N2	L4+48H	12	34	0
Class II	N2	L4+48H	13	94	0
Class II	N2	L4+48H	14	69	0
Class II	N2	L4+48H	15	81	0
Class II	N2	L4+48H	16	65	0
Class II	N2	L4+48H	17	75	0
Class II	N2	L4+48H	18	37	0
Class II	N2	L4+48H	19	93	0
Class II	N2	L4+48H	20	92	0
Class II	N2	L4+48H	21	72	0
Class II	N2	L4+48H	22	44	0
Class II	N2	L4+48H	23	82	0
Class II	N2	L4+48H	24	88	0
Class II	N2	L4+48H	25	80	0
Class II	N2	L4+48H	26	71	0
Class II	N2	L4+48H	27	93	0
Class II	N2	L4+48H	28	82	0
Class II	N2	L4+48H	29	77	0
Class II	N2	L4+48H	30	51	0
Class II	N2	L4+72H	31	0	11
Class II	N2	L4+72H	32	6	3
Class II	N2	L4+72H	33	0	13
Class II	N2	L4+72H	34	0	9
Class II	N2	L4+72H	35	0	20
Class II	N2	L4+72H	36	0	12
Class II	N2	L4+72H	37	0	9
Class II	N2	L4+72H	38	5	9
Class II	N2	L4+72H	39	0	7
Class II	N2	L4+72H	40	0	7
Class II	N2	L4+72H	41	0	16
Class II	N2	L4+72H	42	0	9
Class II	N2	L4+72H	43	0	15
Class II	N2	L4+72H	44	0	3
Class II	N2	L4+72H	45	2	6
Class II	N2	L4+72H	46	0	12
Class II	N2	L4+72H	47	0	18
Class II	N2	L4+72H	48	0	23
Class II	N2	L4+72H	49	0	11
Class II	N2	L4+72H	50	0	11
Class II	N2	L4+72H	51	0	25
Class II	N2	L4+72H	52	0	3
Class II	N2	L4+72H	53	0	12
Class II	N2	L4+72H	54	0	6
Class II	N2	L4+72H	55	0	6
Class II	N2	L4+72H	56	0	3
Class II	N2	L4+72H	57	0	8
Class II	N2	L4+72H	58	0	11
Class II	N2	L4+72H	59	0	4
Class II	N2	L4+72H	60	0	10
Class II	N2	L4+72H	61	0	7
Class II	N2	L4+72H	62	0	21
Class II	N2	L4+72H	63	0	9
Class II	N2	L4+72H	64	0	3
Class II	N2	L4+72H	65	25	0
Class II	N2	L4+72H	66	0	10
Class II	N2	L4+72H	67	0	8
Class II	N2	L4+72H	68	0	7
Class II	N2	L4+72H	69	0	3
Class II	N2	L4+72H	70	0	18
Class III B	NIC1832	L4+48H	1	49	15
Class III B	NIC1832	L4+48H	2	23	9
Class III B	NIC1832	L4+48H	3	41	21
Class III B	NIC1832	L4+48H	4	27	7
Class III B	NIC1832	L4+48H	5	24	11
Class III B	NIC1832	L4+48H	6	20	25
Class III B	NIC1832	L4+48H	7	30	14
Class III B	NIC1832	L4+48H	8	8	14
Class III B	NIC1832	L4+48H	9	0	12
Class III B	NIC1832	L4+48H	10	0	8
Class III B	NIC1832	L4+48H	11	28	18
Class III B	NIC1832	L4+48H	12	31	15
Class III B	NIC1832	L4+48H	13	40	14
Class III B	NIC1832	L4+48H	14	9	20
Class III B	NIC1832	L4+48H	15	22	9
Class III B	NIC1832	L4+48H	16	34	34
Class III B	NIC1832	L4+48H	17	39	10
Class III B	NIC1832	L4+48H	18	11	9
Class III B	NIC1832	L4+48H	19	36	28
Class III B	NIC1832	L4+48H	20	25	24
Class III B	NIC1832	L4+48H	21	25	25
Class III B	NIC1832	L4+48H	22	28	12
Class III B	NIC1832	L4+48H	23	7	14
Class III B	NIC1832	L4+48H	24	10	13
Class III B	NIC1832	L4+48H	25	0	21
Class III B	NIC1832	L4+48H	26	10	9
Class III B	NIC1832	L4+48H	27	42	13
Class III B	NIC1832	L4+48H	28	23	12
Class III B	NIC1832	L4+48H	29	9	19
Class III B	NIC1832	L4+48H	30	19	25
Class III B	NIC1832	L4+48H	31	12	5
Class III B	NIC1832	L4+48H	32	29	8
Class III B	NIC1832	L4+48H	33	34	13
Class III B	NIC1832	L4+72h	34	0	25
Class III B	NIC1832	L4+72h	35	0	19
Class III B	NIC1832	L4+72h	36	0	4
Class III B	NIC1832	L4+72h	37	0	3
Class III B	NIC1832	L4+72h	38	0	10
Class III B	NIC1832	L4+72h	39	0	9
Class III B	NIC1832	L4+72h	40	0	4
Class III B	NIC1832	L4+72h	41	0	12
Class III B	NIC1832	L4+72h	42	0	18
Class III B	NIC1832	L4+72h	43	0	20
Class III B	NIC1832	L4+72h	44	0	8
Class III B	NIC1832	L4+72h	45	0	23
Class III B	NIC1832	L4+72h	46	0	17
Class III B	NIC1832	L4+72h	47	0	7
Class III B	NIC1832	L4+72h	48	0	2
Class III B	NIC1832	L4+72h	49	0	23
Class III B	NIC1832	L4+72h	50	0	13
Class III B	NIC1832	L4+72h	51	0	8
Class III B	NIC1832	L4+72h	52	0	6
Class III B	NIC1832	L4+72h	53	0	4
Class III B	NIC1832	L4+72h	54	0	2
Class III B	NIC1832	L4+72h	55	0	10
Class III B	NIC1832	L4+72h	56	0	4
Class III B	NIC1832	L4+72h	57	0	3
Class III B	NIC1832	L4+72h	58	0	13
Class III B	NIC1832	L4+72h	59	0	17
Class III B	NIC1832	L4+72h	60	0	7
Class III B	NIC1832	L4+72h	61	0	12
Class III B	NIC1832	L4+72h	62	0	15
Class III B	NIC1832	L4+72h	63	0	18
Class III B	NIC1832	L4+72h	64	0	8
Class III B	NIC1832	L4+72h	65	0	9
Class III B	NIC1832	L4+72h	66	0	3
Class III B	NIC1832	L4+72h	67	0	12
Class III B	NIC1832	L4+72h	68	0	2
Class III B	NIC1832	L4+72h	69	0	5
Class III B	NIC1832	L4+72h	70	0	11
Class III B	NIC1832	L4+72h	71	0	8
Class III B	NIC1832	L4+72h	72	0	12
Class III B	NIC1832	L4+72h	73	0	7
Class III A	JU830	L4+48H	1	33	2
Class III A	JU830	L4+48H	2	9	0
Class III A	JU830	L4+48H	3	40	25
Class III A	JU830	L4+48H	4	10	0
Class III A	JU830	L4+48H	5	0	23
Class III A	JU830	L4+48H	6	0	12
Class III A	JU830	L4+48H	7	9	0
Class III A	JU830	L4+48H	8	5	16
Class III A	JU830	L4+48H	9	0	13
Class III A	JU830	L4+48H	10	0	8
Class III A	JU830	L4+48H	11	0	37
Class III A	JU830	L4+48H	12	3	3
Class III A	JU830	L4+48H	13	0	15
Class III A	JU830	L4+48H	14	0	17
Class III A	JU830	L4+48H	15	7	0
Class III A	JU830	L4+48H	16	4	9
Class III A	JU830	L4+48H	17	33	9
Class III A	JU830	L4+48H	18	18	26
Class III A	JU830	L4+48H	19	0	9
Class III A	JU830	L4+48H	20	7	23
Class III A	JU830	L4+48H	21	22	3
Class III A	JU830	L4+48H	22	10	29
Class III A	JU830	L4+48H	23	8	3
Class III A	JU830	L4+48H	24	0	26
Class III A	JU830	L4+48H	25	0	23
Class III A	JU830	L4+48H	26	30	4
Class III A	JU830	L4+48H	27	4	3
Class III A	JU830	L4+48H	28	10	11
Class III A	JU830	L4+48H	29	67	0
Class III A	JU830	L4+48H	30	0	18
Class III A	JU830	L4+48H	31	6	40
Class III A	JU830	L4+48H	32	0	31
Class III A	JU830	L4+48H	33	0	25
Class III A	JU830	L4+48H	34	0	12
Class III A	JU830	L4+48H	35	9	0
Class III A	JU830	L4+48H	36	26	29
Class III A	JU830	L4+48H	37	31	0
Class III A	JU830	L4+72h	38	0	12
Class III A	JU830	L4+72h	39	0	20
Class III A	JU830	L4+72h	40	4	25
Class III A	JU830	L4+72h	41	0	3
Class III A	JU830	L4+72h	42	0	15
Class III A	JU830	L4+72h	43	0	8
Class III A	JU830	L4+72h	44	0	11
Class III A	JU830	L4+72h	45	0	16
Class III A	JU830	L4+72h	46	0	10
Class III A	JU830	L4+72h	47	0	30
Class III A	JU830	L4+72h	48	0	24
Class III A	JU830	L4+72h	49	0	19
Class III A	JU830	L4+72h	50	0	28
Class III A	JU830	L4+72h	51	0	8
Class III A	JU830	L4+72h	52	0	24
Class III A	JU830	L4+72h	53	0	12
Class III A	JU830	L4+72h	54	0	22
Class III A	JU830	L4+72h	55	0	20
Class III A	JU830	L4+72h	56	0	28
Class III A	JU830	L4+72h	57	0	2
Class III A	JU830	L4+72h	58	0	0
Class III A	JU830	L4+72h	59	0	22
Class III A	JU830	L4+72h	60	0	24
Class III A	JU830	L4+72h	61	0	2
Class III A	JU830	L4+72h	62	0	0
Class III A	JU830	L4+72h	63	12	0
Class III A	JU830	L4+72h	64	0	23
Class III A	JU830	L4+72h	65	0	26
Class III A	JU830	L4+72h	66	0	0
Class III A	JU830	L4+72h	67	0	23
Class III A	JU830	L4+72h	68	0	14
Class III A	JU830	L4+72h	69	6	0
Class III A	JU830	L4+72h	70	7	19
