# Supplementary material for: Natural variation in the Caenorhabditis elegans egg-laying circuit modulates an intergenerational fitness trade-off
Source: eLife. 2024 Apr 2;12:RP88253. doi: 10.7554/eLife.88253 (PMC10987095; doi:10.7554/eLife.88253)
Supplement: Figure 11—source data 1. [file elife-88253-fig11-data1.xlsx]

## Sheet: Figure 11
Strain	Stage	Individual	Sperm number	Number of internally hatched larvae
N2	L4+48H	1	61	0
N2	L4+48H	2	110	0
N2	L4+48H	3	97	0
N2	L4+48H	4	75	0
N2	L4+48H	5	35	0
N2	L4+48H	6	99	0
N2	L4+48H	7	77	0
N2	L4+48H	8	45	0
N2	L4+48H	9	91	0
N2	L4+48H	10	77	0
N2	L4+48H	11	80	0
N2	L4+48H	12	34	0
N2	L4+48H	13	94	0
N2	L4+48H	14	69	0
N2	L4+48H	15	81	0
N2	L4+48H	16	65	0
N2	L4+48H	17	75	0
N2	L4+48H	18	37	0
N2	L4+48H	19	93	0
N2	L4+48H	20	92	0
N2	L4+48H	21	72	0
N2	L4+48H	22	44	0
N2	L4+48H	23	82	0
N2	L4+48H	24	88	0
N2	L4+48H	25	80	0
N2	L4+48H	26	71	0
N2	L4+48H	27	93	0
N2	L4+48H	28	82	0
N2	L4+48H	29	77	0
N2	L4+48H	30	51	0
N2	L4+72H	31	0	0
N2	L4+72H	32	6	0
N2	L4+72H	33	0	0
N2	L4+72H	34	0	0
N2	L4+72H	35	0	0
N2	L4+72H	36	0	0
N2	L4+72H	37	0	0
N2	L4+72H	38	5	0
N2	L4+72H	39	0	0
N2	L4+72H	40	0	0
N2	L4+72H	41	0	0
N2	L4+72H	42	0	0
N2	L4+72H	43	0	0
N2	L4+72H	44	0	0
N2	L4+72H	45	2	0
N2	L4+72H	46	0	0
N2	L4+72H	47	0	0
N2	L4+72H	48	0	0
N2	L4+72H	49	0	0
N2	L4+72H	50	0	0
N2	L4+72H	51	0	0
N2	L4+72H	52	0	0
N2	L4+72H	53	0	0
N2	L4+72H	54	0	0
N2	L4+72H	55	0	0
N2	L4+72H	56	0	0
N2	L4+72H	57	0	0
N2	L4+72H	58	0	0
N2	L4+72H	59	0	0
N2	L4+72H	60	0	0
N2	L4+72H	61	0	0
N2	L4+72H	62	0	0
N2	L4+72H	63	0	0
N2	L4+72H	64	0	0
N2	L4+72H	65	25	0
N2	L4+72H	66	0	0
N2	L4+72H	67	0	0
N2	L4+72H	68	0	0
N2	L4+72H	69	0	0
N2	L4+72H	70	0	0
NIC1832	L4+48H	1	49	0
NIC1832	L4+48H	2	23	0
NIC1832	L4+48H	3	41	0
NIC1832	L4+48H	4	27	0
NIC1832	L4+48H	5	24	0
NIC1832	L4+48H	6	20	0
NIC1832	L4+48H	7	30	0
NIC1832	L4+48H	8	8	0
NIC1832	L4+48H	9	0	0
NIC1832	L4+48H	10	0	0
NIC1832	L4+48H	11	28	0
NIC1832	L4+48H	12	31	0
NIC1832	L4+48H	13	40	0
NIC1832	L4+48H	14	9	0
NIC1832	L4+48H	15	22	0
NIC1832	L4+48H	16	34	0
NIC1832	L4+48H	17	39	0
NIC1832	L4+48H	18	11	0
NIC1832	L4+48H	19	36	0
NIC1832	L4+48H	20	25	4
NIC1832	L4+48H	21	25	0
NIC1832	L4+48H	22	28	0
NIC1832	L4+48H	23	7	0
NIC1832	L4+48H	24	10	0
NIC1832	L4+48H	25	0	0
NIC1832	L4+48H	26	10	0
NIC1832	L4+48H	27	42	0
NIC1832	L4+48H	28	23	0
NIC1832	L4+48H	29	9	0
NIC1832	L4+48H	30	19	0
NIC1832	L4+48H	31	12	0
NIC1832	L4+48H	32	29	0
NIC1832	L4+48H	33	34	0
NIC1832	L4+72h	34	0	0
NIC1832	L4+72h	35	0	0
NIC1832	L4+72h	36	0	3
NIC1832	L4+72h	37	0	1
NIC1832	L4+72h	38	0	3
NIC1832	L4+72h	39	0	0
NIC1832	L4+72h	40	0	0
NIC1832	L4+72h	41	0	0
NIC1832	L4+72h	42	0	0
NIC1832	L4+72h	43	0	1
NIC1832	L4+72h	44	0	1
NIC1832	L4+72h	45	0	0
NIC1832	L4+72h	46	0	0
NIC1832	L4+72h	47	0	0
NIC1832	L4+72h	48	0	2
NIC1832	L4+72h	49	0	0
NIC1832	L4+72h	50	0	3
NIC1832	L4+72h	51	0	3
NIC1832	L4+72h	52	0	2
NIC1832	L4+72h	53	0	3
NIC1832	L4+72h	54	0	0
NIC1832	L4+72h	55	0	1
NIC1832	L4+72h	56	0	0
NIC1832	L4+72h	57	0	0
NIC1832	L4+72h	58	0	1
NIC1832	L4+72h	59	0	0
NIC1832	L4+72h	60	0	2
NIC1832	L4+72h	61	0	1
NIC1832	L4+72h	62	0	0
NIC1832	L4+72h	63	0	0
NIC1832	L4+72h	64	0	0
NIC1832	L4+72h	65	0	0
NIC1832	L4+72h	66	0	3
NIC1832	L4+72h	67	0	0
NIC1832	L4+72h	68	0	4
NIC1832	L4+72h	69	0	1
NIC1832	L4+72h	70	0	0
NIC1832	L4+72h	71	0	2
NIC1832	L4+72h	72	0	0
NIC1832	L4+72h	73	0	0
JU830	L4+48H	1	33	0
JU830	L4+48H	2	9	0
JU830	L4+48H	3	40	0
JU830	L4+48H	4	10	0
JU830	L4+48H	5	0	0
JU830	L4+48H	6	0	1
JU830	L4+48H	7	9	0
JU830	L4+48H	8	5	0
JU830	L4+48H	9	0	0
JU830	L4+48H	10	0	9
JU830	L4+48H	11	0	2
JU830	L4+48H	12	3	0
JU830	L4+48H	13	0	0
JU830	L4+48H	14	0	0
JU830	L4+48H	15	7	0
JU830	L4+48H	16	4	0
JU830	L4+48H	17	33	0
JU830	L4+48H	18	18	0
JU830	L4+48H	19	0	0
JU830	L4+48H	20	7	0
JU830	L4+48H	21	22	0
JU830	L4+48H	22	10	0
JU830	L4+48H	23	8	3
JU830	L4+48H	24	0	1
JU830	L4+48H	25	0	4
JU830	L4+48H	26	30	0
JU830	L4+48H	27	4	0
JU830	L4+48H	28	10	0
JU830	L4+48H	29	67	0
JU830	L4+48H	30	0	2
JU830	L4+48H	31	6	1
JU830	L4+48H	32	0	1
JU830	L4+48H	33	0	0
JU830	L4+48H	34	0	0
JU830	L4+48H	35	9	0
JU830	L4+48H	36	26	0
JU830	L4+48H	37	31	0
JU830	L4+72h	38	0	0
JU830	L4+72h	39	0	1
JU830	L4+72h	40	4	0
JU830	L4+72h	41	0	3
JU830	L4+72h	42	0	0
JU830	L4+72h	43	0	0
JU830	L4+72h	44	0	0
JU830	L4+72h	45	0	0
JU830	L4+72h	46	0	1
JU830	L4+72h	47	0	0
JU830	L4+72h	48	0	0
JU830	L4+72h	49	0	0
JU830	L4+72h	50	0	0
JU830	L4+72h	51	0	0
JU830	L4+72h	52	0	0
JU830	L4+72h	53	0	0
JU830	L4+72h	54	0	0
JU830	L4+72h	55	0	0
JU830	L4+72h	56	0	0
JU830	L4+72h	57	0	2
JU830	L4+72h	58	0	5
JU830	L4+72h	59	0	2
JU830	L4+72h	60	0	0
JU830	L4+72h	61	0	4
JU830	L4+72h	62	0	3
JU830	L4+72h	63	12	0
JU830	L4+72h	64	0	0
JU830	L4+72h	65	0	0
JU830	L4+72h	66	0	2
JU830	L4+72h	67	0	0
JU830	L4+72h	68	0	2
JU830	L4+72h	69	6	2
JU830	L4+72h	70	7	2
JU751	L4+(43-48H)	1	3	0
JU751	L4+(43-48H)	2	0	0
JU751	L4+(43-48H)	3	16	0
JU751	L4+(43-48H)	4	5	1
JU751	L4+(43-48H)	5	10	0
JU751	L4+(43-48H)	6	0	13
JU751	L4+(43-48H)	7	0	23
JU751	L4+(43-48H)	8	6	0
JU751	L4+(43-48H)	9	0	4
JU751	L4+(43-48H)	10	0	0
JU751	L4+(43-48H)	11	2	0
JU751	L4+(43-48H)	12	0	6
JU751	L4+(43-48H)	13	15	0
JU751	L4+(43-48H)	14	0	2
JU751	L4+(43-48H)	15	0	0
JU751	L4+(43-48H)	16	0	0
JU751	L4+(43-48H)	17	0	12
JU751	L4+(43-48H)	18	0	5
JU751	L4+(43-48H)	19	0	0
JU751	L4+(43-48H)	20	0	3
JU751	L4+(43-48H)	21	0	4
JU751	L4+(43-48H)	22	0	9
JU751	L4+(43-48H)	23	0	0
JU751	L4+(43-48H)	24	0	0
JU751	L4+(43-48H)	25	9	0
JU751	L4+(43-48H)	26	0	12
JU751	L4+(43-48H)	27	0	0
JU751	L4+(43-48H)	28	12	0
JU751	L4+(43-48H)	29	0	10
JU751	L4+(43-48H)	30	0	0
JU751	L4+(43-48H)	31	0	4
JU751	L4+(43-48H)	32	0	0
JU751	L4+(43-48H)	33	0	26
JU751	L4+(43-48H)	34	0	0
JU751	L4+(43-48H)	35	6	0
JU751	L4+(43-48H)	36	6	1
JU751	L4+(43-48H)	37	5	0
JU751	L4+(43-48H)	38	0	8
JU751	L4+(43-48H)	39	22	0
JU751	L4+(43-48H)	40	9	10
JU751	L4+(43-48H)	41	19	0
JU751	L4+(43-48H)	42	32	0
JU751	L4+(43-48H)	43	34	0
JU751	L4+(43-48H)	44	47	0
JU751	L4+(43-48H)	45	46	0
JU751	L4+(43-48H)	46	24	2
JU751	L4+(43-48H)	47	26	1
JU751	L4+(43-48H)	48	31	0
JU751	L4+(43-48H)	49	121	0
JU751	L4+(43-48H)	50	43	1
JU751	L4+(43-48H)	51	0	32
JU751	L4+(43-48H)	52	25	1
JU751	L4+(43-48H)	53	38	0
JU751	L4+(43-48H)	54	27	0
JU751	L4+(43-48H)	55	35	0
JU751	L4+(43-48H)	56	14	0
JU751	L4+(43-48H)	57	28	1
JU751	L4+(43-48H)	58	33	4
JU751	L4+(43-48H)	59	26	4
JU751	L4+(43-48H)	60	28	0
JU751	L4+(43-48H)	61	8	0
JU751	L4+(43-48H)	62	35	0
JU751	L4+(43-48H)	63	8	1
JU751	L4+(43-48H)	64	4	10
JU751	L4+(43-48H)	65	31	5
JU751	L4+(43-48H)	66	16	2
JU751	L4+(43-48H)	67	19	1
JU751	L4+(43-48H)	68	11	8
JU751	L4+(43-48H)	69	9	1
JU751	L4+(43-48H)	70	43	0
JU751	L4+(43-48H)	71	53	8
JU751	L4+(43-48H)	72	21	0
JU751	L4+(43-48H)	73	30	0
JU751	L4+(43-48H)	74	80	0
JU751	L4+(43-48H)	75	23	5
JU751	L4+(43-48H)	76	80	1
JU751	L4+(43-48H)	77	33	1
JU751	L4+(43-48H)	78	45	0
JU751	L4+(43-48H)	79	8	0
JU751	L4+(43-48H)	80	58	0
JU751	L4+(43-48H)	81	0	13
JU751	L4+(43-48H)	82	59	3
JU751	L4+(43-48H)	83	18	0
JU751	L4+(43-48H)	84	78	0
JU751	L4+(43-48H)	85	32	8
JU751	L4+(43-48H)	86	90	5
JU751	L4+66h	87	0	6
JU751	L4+66h	88	0	4
JU751	L4+66h	89	0	15
JU751	L4+66h	90	0	5
JU751	L4+66h	91	0	2
JU751	L4+66h	92	0	12
JU751	L4+66h	93	12	0
JU751	L4+66h	94	0	7
JU751	L4+66h	95	24	7
JU751	L4+66h	96	0	7
JU751	L4+66h	97	0	16
JU751	L4+66h	98	0	3
JU751	L4+66h	99	0	3
JU751	L4+66h	100	0	23
JU751	L4+66h	101	5	7
JU751	L4+66h	102	7	0
JU751	L4+66h	103	0	28
JU751	L4+66h	104	4	0
JU751	L4+66h	105	0	11
JU751	L4+66h	106	25	1
JU751	L4+66h	107	0	11
JU751	L4+66h	108	27	5
JU751	L4+66h	109	0	5
JU751	L4+66h	110	0	9
JU751	L4+66h	111	3	0
JU751	L4+66h	112	0	4
JU751	L4+66h	113	0	18
JU751	L4+66h	114	0	28
JU751	L4+66h	115	0	8
JU751	L4+66h	116	0	9
JU751	L4+66h	117	3	0
JU751	L4+66h	118	0	4
JU751	L4+66h	119	0	18
JU751	L4+66h	120	0	28
JU751	L4+66h	121	0	8
JU751	L4+72h	122	25	2
JU751	L4+72h	123	0	0
JU751	L4+72h	124	0	9
JU751	L4+72h	125	0	7
JU751	L4+72h	126	0	10
JU751	L4+72h	127	0	0
JU751	L4+72h	128	0	16
JU751	L4+72h	129	0	8
JU751	L4+72h	130	15	2
JU751	L4+72h	131	0	7
JU751	L4+72h	132	0	2
JU751	L4+72h	133	0	13
JU751	L4+72h	134	0	0
JU751	L4+72h	135	0	5
JU751	L4+72h	136	0	0
JU751	L4+72h	137	0	3
JU751	L4+72h	138	0	13
JU751	L4+72h	139	0	2
JU751	L4+72h	140	0	7
JU751	L4+72h	141	0	22
JU751	L4+72h	142	0	0
JU751	L4+72h	143	0	10
JU751	L4+72h	144	0	1
JU751	L4+72h	145	0	6
JU751	L4+72h	146	0	4
JU751	L4+72h	147	0	0
JU751	L4+72h	148	0	2
JU751	L4+72h	149	0	0
JU751	L4+72h	150	0	8
JU751	L4+72h	151	0	8
JU751	L4+72h	152	0	2
JU751	L4+72h	153	0	7
JU751	L4+72h	154	0	3
JU751	L4+72h	155	0	3
JU751	L4+72h	156	0	6
JU751	L4+72h	157	0	6
JU751	L4+72h	158	0	4
JU751	L4+72h	159	0	4
JU751	L4+72h	160	0	4
JU751	L4+72h	161	0	6
JU751	L4+72h	162	0	8
JU751	L4+72h	163	0	5
JU751	L4+72h	164	0	4
JU751	L4+72h	165	0	10
JU751	L4+72h	166	0	4
JU751	L4+72h	167	0	4
JU751	L4+72h	168	0	1
JU751	L4+72h	169	0	4
JU751	L4+72h	170	0	3
JU751	L4+72h	171	0	1
JU751	L4+72h	172	0	8
JU751	L4+72h	173	0	11
JU751	L4+72h	174	0	1
JU751	L4+72h	175	0	2
JU751	L4+72h	176	0	3
JU751	L4+72h	177	0	4
JU751	L4+72h	178	0	5
JU751	L4+72h	179	0	6
JU751	L4+72h	180	0	0
JU751	L4+72h	181	0	9
JU751	L4+72h	182	0	3
JU751	L4+72h	183	0	9
JU751	L4+72h	184	0	10
JU751	L4+72h	185	0	8
JU751	L4+72h	186	0	4
JU751	L4+72h	187	0	6
JU751	L4+72h	188	0	0
JU751	L4+72h	189	0	4
JU751	L4+72h	190	0	6
JU751	L4+72h	191	0	10
JU751	L4+72h	192	0	0
JU751	L4+72h	193	0	1
QG2873	L4+66h	1	6	0
QG2873	L4+66h	2	31	0
QG2873	L4+66h	3	24	0
QG2873	L4+66h	4	40	0
QG2873	L4+66h	5	14	0
QG2873	L4+66h	6	20	0
QG2873	L4+66h	7	33	0
QG2873	L4+66h	8	6	0
QG2873	L4+66h	9	0	0
QG2873	L4+66h	10	32	0
QG2873	L4+66h	11	10	0
QG2873	L4+66h	12	25	0
QG2873	L4+66h	13	40	0
QG2873	L4+66h	14	40	0
QG2873	L4+66h	15	23	0
QG2873	L4+96h	16	0	0
QG2873	L4+96h	17	0	0
QG2873	L4+96h	18	0	0
QG2873	L4+96h	19	0	0
QG2873	L4+96h	20	0	0
QG2873	L4+96h	21	0	0
QG2873	L4+96h	22	0	0
QG2873	L4+96h	23	0	0
QG2873	L4+96h	24	0	0
QG2873	L4+96h	25	0	0
QG2873	L4+96h	26	0	0
QG2873	L4+96h	27	0	0
QG2873	L4+96h	28	0	0
QG2873	L4+96h	29	0	0
QG2873	L4+96h	30	0	0
QG2873	L4+96h	31	0	0
QG2873	L4+96h	32	0	0
QG2873	L4+96h	33	0	0
QG2873	L4+96h	34	0	0
QG2873	L4+96h	35	0	0
QG2873	L4+96h	36	0	0
QG2873	L4+96h	37	0	0
QG2873	L4+96h	38	0	0
QG2873	L4+96h	39	0	0
QG2873	L4+96h	40	0	0
QG2873	L4+96h	41	0	0
QG2873	L4+96h	42	0	0
QG2873	L4+96h	43	0	0
QG2873	L4+96h	44	0	0
QG2873	L4+96h	45	0	0
ED3005	L4+48h	1	60	0
ED3005	L4+48h	2	41	0
ED3005	L4+48h	3	38	0
ED3005	L4+48h	4	12	0
ED3005	L4+48h	5	56	0
ED3005	L4+48h	6	61	0
ED3005	L4+48h	7	54	0
ED3005	L4+48h	8	43	0
ED3005	L4+48h	9	41	0
ED3005	L4+48h	10	60	0
ED3005	L4+48h	11	67	0
ED3005	L4+48h	12	42	0
ED3005	L4+48h	13	8	0
ED3005	L4+48h	14	41	0
ED3005	L4+48h	15	20	0
ED3005	L4+48h	16	5	0
ED3005	L4+48h	17	0	0
ED3005	L4+48h	18	0	0
ED3005	L4+48h	19	25	0
ED3005	L4+48h	20	0	0
ED3005	L4+48h	21	0	0
ED3005	L4+48h	22	62	0
ED3005	L4+48h	23	0	0
ED3005	L4+48h	24	6	0
ED3005	L4+48h	25	45	0
ED3005	L4+48h	26	71	0
ED3005	L4+48h	27	7	0
ED3005	L4+72h	28	0	0
ED3005	L4+72h	29	0	0
ED3005	L4+72h	30	0	0
ED3005	L4+72h	31	0	2
ED3005	L4+72h	32	0	0
ED3005	L4+72h	33	0	0
ED3005	L4+72h	34	0	2
ED3005	L4+72h	35	0	0
ED3005	L4+72h	36	0	0
ED3005	L4+72h	37	0	0
ED3005	L4+72h	38	0	0
ED3005	L4+72h	39	0	0
ED3005	L4+72h	40	0	0
ED3005	L4+72h	41	0	0
ED3005	L4+72h	42	0	2
ED3005	L4+72h	43	0	0
ED3005	L4+72h	44	0	0
ED3005	L4+72h	45	0	0
ED3005	L4+72h	46	0	2
ED3005	L4+72h	47	0	1
ED3005	L4+72h	48	0	0
ED3005	L4+72h	49	0	0
ED3005	L4+72h	50	0	0
ED3005	L4+72h	51	0	0
ED3005	L4+72h	52	0	0
ED3005	L4+72h	53	0	0
ED3005	L4+72h	54	0	0
ED3005	L4+72h	55	0	0
ED3005	L4+72h	56	0	0
ED3005	L4+72h	57	0	0
ED3005	L4+72h	58	0	0
ED3005	L4+72h	59	0	0
ED3005	L4+72h	60	0	0
ED3005	L4+72h	61	0	0
ED3005	L4+72h	62	0	0
ED3005	L4+72h	63	0	0
ED3005	L4+72h	64	0	0
ED3005	L4+72h	65	0	0
ED3005	L4+72h	66	0	1
ED3005	L4+72h	67	0	0
ED3005	L4+72h	68	0	0
ED3005	L4+72h	69	0	0
ED3005	L4+72h	70	0	0
ED3005	L4+72h	71	0	0
ED3005	L4+72h	72	0	0
ED3005	L4+72h	73	0	0
ED3005	L4+72h	74	0	0
ED3005	L4+72h	75	0	0
ED3005	L4+72h	76	0	0
ED3005	L4+72h	77	0	0
ED3005	L4+72h	78	0	0
ED3005	L4+72h	79	0	0
ED3005	L4+72h	80	0	0
ED3005	L4+72h	81	0	0
ED3005	L4+72h	82	0	0
ED3005	L4+72h	83	0	0
ED3005	L4+72h	84	0	0
ED3005	L4+72h	85	0	0
ED3005	L4+72h	86	0	0
ED3005	L4+72h	87	0	0
ED3005	L4+72h	88	0	0
ED3005	L4+72h	89	0	0
ED3005	L4+72h	90	0	0
ED3005	L4+72h	91	0	1
ED3005	L4+72h	92	0	0
ED3005	L4+72h	93	0	0
ED3005	L4+72h	94	0	0
ED3005	L4+72h	95	0	1
ED3005	L4+72h	96	0	3
ED3005	L4+72h	97	0	0
ED3005	L4+72h	98	0	0
ED3005	L4+72h	99	0	0
ED3005	L4+72h	100	0	0
ED3005	L4+72h	101	0	0
ED3005	L4+72h	102	0	0
ED3005	L4+72h	103	0	0
ED3005	L4+72h	104	0	0
ED3005	L4+72h	105	0	0
ED3005	L4+72h	106	0	0
ED3005	L4+72h	107	0	2
ED3005	L4+72h	108	0	0
ED3005	L4+72h	109	0	0
ED3005	L4+72h	110	0	0
ED3005	L4+72h	111	0	0
ED3005	L4+72h	112	0	0
ED3005	L4+96h	113	0	0
ED3005	L4+96h	114	0	0
ED3005	L4+96h	115	0	0
ED3005	L4+96h	116	0	6
ED3005	L4+96h	117	0	4
ED3005	L4+96h	118	0	0
ED3005	L4+96h	119	0	0
ED3005	L4+96h	120	0	2
ED3005	L4+96h	121	0	1
ED3005	L4+96h	122	0	0
ED3005	L4+96h	123	0	0
ED3005	L4+96h	124	0	0
ED3005	L4+96h	125	0	0
ED3005	L4+96h	126	0	0
ED3005	L4+96h	127	0	0
ED3005	L4+96h	128	0	0
ED3005	L4+96h	129	0	0
ED3005	L4+96h	130	0	0
ED3005	L4+96h	131	0	0
ED3005	L4+96h	132	0	0
ED3005	L4+96h	133	0	2
ED3005	L4+96h	134	0	0
ED3005	L4+96h	135	0	0
ED3005	L4+96h	136	0	0
ED3005	L4+96h	137	0	0
ED3005	L4+96h	138	0	0
ED3005	L4+96h	139	0	2
ED3005	L4+96h	140	0	0
ED3005	L4+96h	141	0	0
ED3005	L4+96h	142	0	0
ED3005	L4+96h	143	0	0
ED3005	L4+96h	144	0	0
ED3005	L4+96h	145	0	0
ED3005	L4+96h	146	0	2
ED3005	L4+96h	147	0	2
ED3005	L4+96h	148	0	0
ED3005	L4+96h	149	0	0
ED3005	L4+96h	150	0	0
ED3005	L4+96h	151	0	0
ED3005	L4+96h	152	0	0
ED3005	L4+96h	153	0	0
ED3005	L4+96h	154	0	0
JU2593	L4+28H	1	108	0
JU2593	L4+28H	2	47	3
JU2593	L4+28H	3	105	0
JU2593	L4+28H	4	53	3
JU2593	L4+28H	5	38	0
JU2593	L4+28H	6	17	0
JU2593	L4+28H	7	78	0
JU2593	L4+28H	8	87	0
JU2593	L4+28H	9	99	0
JU2593	L4+28H	10	71	10
JU2593	L4+28H	11	85	0
JU2593	L4+28H	12	38	0
JU2593	L4+28H	13	36	0
JU2593	L4+28H	14	119	0
JU2593	L4+28H	15	97	0
JU2593	L4+28H	16	78	0
JU2593	L4+28H	17	87	3
JU2593	L4+28H	18	125	0
JU2593	L4+28H	19	41	0
JU2593	L4+28H	20	39	1
JU2593	L4+28H	21	25	0
JU2593	L4+28H	22	53	0
JU2593	L4+28H	23	46	0
JU2593	L4+28H	24	76	0
JU2593	L4+28H	25	37	1
JU2593	L4+28H	26	63	0
JU2593	L4+36h	27	87	0
JU2593	L4+36h	28	34	0
JU2593	L4+36h	29	40	0
JU2593	L4+36h	30	49	2
JU2593	L4+36h	31	78	0
JU2593	L4+36h	32	62	1
JU2593	L4+36h	33	32	2
JU2593	L4+36h	34	71	0
JU2593	L4+36h	35	60	0
JU2593	L4+36h	36	2	0
JU2593	L4+36h	37	59	0
JU2593	L4+36h	38	115	0
JU2593	L4+36h	39	39	0
JU2593	L4+36h	40	61	0
JU2593	L4+36h	41	0	2
JU2593	L4+36h	42	63	0
JU2593	L4+36h	43	68	0
JU2593	L4+36h	44	8	0
JU2593	L4+36h	45	70	0
JU2593	L4+36h	46	35	0
JU2593	L4+36h	47	101	0
JU2593	L4+36h	48	71	0
JU2593	L4+36h	49	89	0
JU2593	L4+36h	50	120	0
JU2593	L4+36h	51	0	58
JU2593	L4+40H	52	21	1
JU2593	L4+40H	53	5	0
JU2593	L4+40H	54	0	10
JU2593	L4+40H	55	0	0
JU2593	L4+40H	56	27	0
JU2593	L4+40H	57	19	0
JU2593	L4+40H	58	0	10
JU2593	L4+40H	59	25	0
JU2593	L4+40H	60	45	1
JU2593	L4+40H	61	0	1
JU2593	L4+40H	62	80	0
JU2593	L4+40H	63	11	0
JU2593	L4+40H	64	0	4
JU2593	L4+40H	65	115	0
JU2593	L4+40H	66	34	1
JU2593	L4+40H	67	130	0
JU2593	L4+40H	68	21	1
JU2593	L4+40H	69	11	0
JU2593	L4+40H	70	42	0
JU2593	L4+40H	71	19	0
JU2593	L4+40H	72	0	5
JU2593	L4+40H	73	0	1
JU2593	L4+40H	74	12	0
JU2593	L4+40H	75	15	0
JU2593	L4+40H	76	30	0
JU2593	L4+40H	77	2	4
JU2593	L4+40H	78	5	0
JU2593	L4+40H	79	24	0
JU2593	L4+40H	80	26	0
JU2593	L4+40H	81	38	8
JU2593	L4+40H	82	12	0
JU2593	L4+40H	83	0	0
JU2593	L4+40H	84	17	1
JU2593	L4+40H	85	0	0
JU2593	L4+40H	86	9	0
JU2593	L4+40H	87	12	0
JU2593	L4+40H	88	3	0
JU2593	L4+40H	89	0	0
JU2593	L4+40H	90	3	0
JU2593	L4+40H	91	8	0
JU2593	L4+40H	92	4	0
JU2593	L4+40H	93	29	0
JU2593	L4+40H	94	28	0
JU2593	L4+40H	95	0	35
JU2593	L4+40H	96	0	25
JU2593	L4+40H	97	9	0
JU2593	L4+40H	98	0	1
JU2593	L4+40H	99	23	0
JU2593	L4+40H	100	4	0
JU2593	L4+40H	101	70	0
JU2593	L4+40H	102	7	0
JU2593	L4+40H	103	4	0
JU2593	L4+40H	104	9	0
JU2593	L4+40H	105	8	1
JU2593	L4+40H	106	55	0
JU2593	L4+40H	107	0	1
JU2593	L4+40H	108	0	6
JU2593	L4+40H	109	0	0
JU2593	L4+40H	110	42	0
JU2593	L4+40H	111	10	0
JU2593	L4+40H	112	8	0
JU2593	L4+40H	113	3	0
JU2593	L4+40H	114	150	0
JU2593	L4+40H	115	14	0
JU2593	L4+40H	116	12	0
JU2593	L4+40H	117	24	0
JU2593	L4+40H	118	70	0
JU2593	L4+40H	119	12	0
JU2593	L4+40H	120	3	1
JU2593	L4+40H	121	65	0
JU2593	L4+40H	122	2	0
JU2593	L4+40H	123	45	0
JU2593	L4+40H	124	38	0
JU2593	L4+45h	125	0	1
JU2593	L4+45h	126	0	0
JU2593	L4+45h	127	0	0
JU2593	L4+45h	128	0	1
JU2593	L4+45h	129	0	3
JU2593	L4+45h	130	0	5
JU2593	L4+45h	131	0	0
JU2593	L4+45h	132	4	11
JU2593	L4+45h	133	3	0
JU2593	L4+45h	134	0	5
JU2593	L4+45h	135	0	3
JU2593	L4+45h	136	0	0
JU2593	L4+45h	137	0	10
JU2593	L4+45h	138	0	3
JU2593	L4+45h	139	0	12
JU2593	L4+45h	140	0	9
JU2593	L4+45h	141	0	2
JU2593	L4+45H	142	8	4
JU2593	L4+45H	143	0	20
JU2593	L4+45H	144	0	2
JU2593	L4+45H	145	3	4
JU2593	L4+45H	146	0	12
JU2593	L4+45H	147	3	2
JU2593	L4+45H	148	0	3
JU2593	L4+45H	149	0	3
JU2593	L4+45H	150	3	2
JU2593	L4+45H	151	7	1
JU2593	L4+45H	152	0	0
JU2593	L4+45H	153	0	6
JU2593	L4+45H	154	4	7
JU2593	L4+45H	155	22	0
JU2593	L4+45H	156	0	2
JU2593	L4+45H	157	0	13
JU2593	L4+45H	158	0	8
JU2593	L4+48h	159	0	1
JU2593	L4+48h	160	0	0
JU2593	L4+48h	161	0	0
JU2593	L4+48h	162	0	1
JU2593	L4+48h	163	0	3
JU2593	L4+48h	164	0	5
JU2593	L4+48h	165	0	0
JU2593	L4+48h	166	4	11
JU2593	L4+48h	167	3	0
JU2593	L4+48h	168	0	5
JU2593	L4+48h	169	0	3
JU2593	L4+48h	170	0	0
JU2593	L4+48h	171	0	10
JU2593	L4+48h	172	0	3
JU2593	L4+48h	173	0	12
JU2593	L4+48h	174	0	9
JU2593	L4+48h	175	0	2
JU2829	L4+48h	1	20	0
JU2829	L4+48h	2	0	0
JU2829	L4+48h	3	21	0
JU2829	L4+48h	4	0	6
JU2829	L4+48h	5	0	0
JU2829	L4+48h	6	56	1
JU2829	L4+48h	7	122	0
JU2829	L4+48h	8	20	0
JU2829	L4+48h	9	62	0
JU2829	L4+48h	10	16	2
JU2829	L4+48h	11	113	0
JU2829	L4+48h	12	75	0
JU2829	L4+48h	13	56	0
JU2829	L4+48h	14	0	0
JU2829	L4+48h	15	105	0
JU2829	L4+48h	16	92	0
JU2829	L4+48h	17	0	0
JU2829	L4+48h	18	98	0
JU2829	L4+48h	19	72	0
JU2829	L4+48h	20	16	0
JU2829	L4+48h	21	78	0
JU2829	L4+48h	22	130	0
JU2829	L4+48h	23	94	0
JU2829	L4+48h	24	78	0
JU2829	L4+72h	25	0	0
JU2829	L4+72h	26	0	0
JU2829	L4+72h	27	3	1
JU2829	L4+72h	28	0	3
JU2829	L4+72h	29	0	0
JU2829	L4+72h	30	0	0
JU2829	L4+72h	31	15	0
JU2829	L4+72h	32	6	1
JU2829	L4+72h	33	0	1
JU2829	L4+72h	34	17	2
JU2829	L4+72h	35	0	0
JU2829	L4+72h	36	4	0
JU2829	L4+72h	37	0	0
JU2829	L4+72h	38	0	0
JU2829	L4+72h	39	15	0
JU2829	L4+72h	40	0	0
JU2829	L4+72h	41	0	0
JU2829	L4+72h	42	10	1
JU2829	L4+72h	43	0	0
JU2829	L4+72h	44	0	0
JU2829	L4+72h	45	11	0
JU2829	L4+72h	46	6	0
JU2829	L4+72h	47	0	1
JU2829	L4+96h	48	0	1
JU2829	L4+96h	49	0	0
JU2829	L4+96h	50	0	0
JU2829	L4+96h	51	0	0
JU2829	L4+96h	52	0	0
JU2829	L4+96h	53	0	0
JU2829	L4+96h	54	0	0
JU2829	L4+96h	55	0	0
JU2829	L4+96h	56	0	0
JU2829	L4+96h	57	0	0
JU2829	L4+96h	58	0	0
JU2829	L4+96h	59	0	0
JU2829	L4+96h	60	0	0
JU2829	L4+96h	61	0	0
JU2829	L4+96h	62	0	0
JU2829	L4+96h	63	0	0
JU2829	L4+96h	64	0	0
JU2829	L4+96h	65	0	0
JU2829	L4+96h	66	0	0
JU2829	L4+96h	67	0	0
JU2829	L4+96h	68	0	0
JU2829	L4+96h	69	0	0
JU2829	L4+96h	70	0	0
JU2829	L4+96h	71	0	0
JU2829	L4+96h	72	0	0
JU2829	L4+96h	73	0	0
JU2829	L4+96h	74	0	0
JU2829	L4+96h	75	0	0
JU2829	L4+96h	76	0	0
JU2829	L4+96h	77	0	0
JU2829	L4+96h	78	0	0
JU2829	L4+96h	79	0	0
JU2829	L4+96h	80	0	0
JU2829	L4+96h	81	0	0
JU2829	L4+96h	82	0	0
JU2829	L4+96h	83	0	0
JU2829	L4+96h	84	0	0
JU2829	L4+96h	85	0	0
JU2829	L4+96h	86	0	0
JU2829	L4+96h	87	0	0
JU2829	L4+96h	88	0	0
JU2829	L4+96h	89	0	0
JU2829	L4+96h	90	0	0
JU2829	L4+96h	91	0	0
JU2829	L4+96h	92	0	0
JU2829	L4+96h	93	0	0
JU2829	L4+96h	94	0	0
JU2829	L4+96h	95	0	0
JU2829	L4+96h	96	0	0
JU2829	L4+96h	97	0	0
JU2829	L4+96h	98	0	0
JU1200	L4+48H	1	36	0
JU1200	L4+48H	2	9	0
JU1200	L4+48H	3	8	0
JU1200	L4+48H	4	28	0
JU1200	L4+48H	5	36	0
JU1200	L4+48H	6	9	0
JU1200	L4+48H	7	19	0
JU1200	L4+48H	8	30	0
JU1200	L4+48H	9	18	0
JU1200	L4+48H	10	12	0
JU1200	L4+48H	11	8	0
JU1200	L4+48H	12	36	0
JU1200	L4+48H	13	29	0
JU1200	L4+48H	14	44	0
JU1200	L4+48H	15	41	0
JU1200	L4+48H	16	35	0
JU1200	L4+48H	17	60	0
JU1200	L4+48H	18	0	0
JU1200	L4+48H	19	65	0
JU1200	L4+48H	20	61	0
JU1200	L4+48H	21	89	0
JU1200	L4+48H	22	14	0
JU1200	L4+48H	23	51	0
JU1200	L4+48H	24	53	0
JU1200	L4+72h	25	0	0
JU1200	L4+72h	26	0	0
JU1200	L4+72h	27	0	0
JU1200	L4+72h	28	0	0
JU1200	L4+72h	29	0	0
JU1200	L4+72h	30	0	0
JU1200	L4+72h	31	0	0
JU1200	L4+72h	32	0	0
JU1200	L4+72h	33	0	0
JU1200	L4+72h	34	0	0
JU1200	L4+72h	35	0	0
JU1200	L4+72h	36	0	0
JU1200	L4+72h	37	0	0
JU1200	L4+72h	38	0	0
JU1200	L4+72h	39	0	0
JU1200	L4+72h	40	0	0
JU1200	L4+72h	41	0	0
JU1200	L4+72h	42	0	0
JU1200	L4+72h	43	0	0
JU1200	L4+72h	44	0	0
JU1200	L4+72h	45	0	0
JU1200	L4+72h	46	2	0
JU1200	L4+72h	47	0	0
JU1200	L4+72h	48	6	0
JU1200	L4+72h	49	0	0
JU1200	L4+72h	50	0	0
JU1200	L4+72h	51	0	0
