# Supplementary material for: Natural variation in the Caenorhabditis elegans egg-laying circuit modulates an intergenerational fitness trade-off
Source: eLife. 2024 Apr 2;12:RP88253. doi: 10.7554/eLife.88253 (PMC10987095; doi:10.7554/eLife.88253)
Supplement: Figure 12—source data 1. [file elife-88253-fig12-data1.xlsx]

## Sheet: Figure 12A
Class	Strain	Stage 1	Stage 2	Stage 3	Stage 4	Stage 5	Stage 6 (L1)	Total
Class I	QG2873	7	54	0	0	0	0	61
Class I	JU3166	0	45	0	0	0	0	45
Class II	CB4856	0	57	2	0	0	0	59
Class II	JU1200	0	57	0	0	0	0	57
Class II	QX1430	2	59	0	0	0	0	61
Class II	N2	0	52	9	0	0	0	61
Class III B	JU751	0	2	26	19	2	0	49
Class III B	NIC1832	0	3	47	15	0	0	65
Class III B	JU2587	0	2	32	30	3	0	67
Class III B	JU2593	0	0	5	28	39	0	72
Class III A	ED3005	0	27	25	1	0	0	53
Class III A	JU440	1	25	30	2	1	0	59
Class III A	JU830	0	1	30	26	0	0	57
Class III A	NIC1786	0	23	42	0	1	0	66
Class III A	JU2829	0	12	54	2	1	0	69

## Sheet: Figure 12B
Class	Strain	Estimate: time point at which 50% of eggs had hatched	RAW DATA:	Number of eggs at 0h	Number of eggs hatched at 1h	Number of hatched eggs at 1h	Percentage of eggs hatched at 1h	Number of eggs at 2h	Number of hatched eggs at 2h	Percentage of eggs hatched at 2h	Number of eggs at 3h	Number of hatched eggs at 3h	Percentage of eggs hatched at 3h	Number of eggs at 4h	Number of hatched eggs at 4h	Percentage of eggs hatched at 4h	Number of eggs at 5h	Number of hatched eggs at 5h	Percentage of eggs hatched at 5h	Number of eggs at 6h	Number of hatched eggs at 6h	Percentage of eggs hatched at 6h	Number of eggs at 8h	Number of hatched eggs at 8h	Percentage of eggs hatched at 8h	Number of eggs at 10h	Number of hatched eggs at 10h	Percentage of eggs hatched at 10h	Number of eggs at 11h	Number of hatched eggs at 11h	Percentage of eggs hatched at 11h	Number of eggs at 12h	Number of hatched eggs at 12h	Percentage of eggs hatched at 12h	Number of eggs at 13h	Number of hatched eggs at 13h	Percentage of eggs hatched at 13h
Class I	JU3166	11.2		177	177	0	0	177	0	0	177	0	0	170	7	3.9548	164	13	7.34463	160	17	9.60452	155	22	12.4294	127	50	28.2486	111	66	37.2881	0	177	100	0	177	100
Class I	QG2873	11.4		115	115	0	0	115	0	0	108	7	6.08696	108	7	6.08696	108	7	6.08696	108	7	6.08696	108	7	6.08696	101	14	12.1739	97	18	15.6522	1	114	99.1304	0	115	100
Class II	CB4856	9.6		34	34	0	0	34	0	0	33	1	2.94118	32	2	5.88235	31	3	8.82353	31	3	8.82353	31	3	8.82353	22	12	35.2941	14	20	58.8235	2	32	94.1176	0	34	100
Class II	JU1200	8.8		93	88	4	4.30108	85	8	8.60215	81	12	12.9032	81	12	12.9032	78	15	16.129	78	15	16.129	75	18	19.3548	42	51	54.8387	20	73	78.4946	4	89	95.6989	0	93	100
Class II	N2	10.4		112	112	0	0	112	0	0	112	0	0	112	0	0	112	0	0	112	0	0	112	0	0	85	27	24.1071	15	97	86.6071	1	111	99.1071	0	112	100
Class II	QX1430	10.7		108	108	0	0	108	0	0	108	0	0	108	0	0	108	0	0	108	0	0	108	0	0	89	19	17.5926	37	71	65.7407	0	108	100	0	108	100
Class III A	ED3005	10.2		143	143	0	0	143	0	0	143	0	0	142	1	0.699301	142	1	0.699301	141	2	1.3986	140	3	2.0979	88	55	38.4615	16	127	88.8112	0	143	100	0	143	100
Class III A	JU2829	5.8		48	47	1	2.08333	46	2	4.16667	33	15	31.25	33	15	31.25	31	17	35.4167	22	26	54.1667	14	34	70.8333	0	48	100	0	48	100	0	48	100	0	48	100
Class III A	JU440	8.9		99	97	2	2.0202	97	2	2.0202	90	9	9.09091	90	9	9.09091	90	9	9.09091	83	16	16.1616	71	28	28.2828	26	73	73.7374	11	88	88.8889	2	97	97.9798	0	99	100
Class III A	JU830	5.8		111	108	3	2.7027	105	6	5.40541	96	15	13.5135	77	34	30.6306	74	37	33.3333	54	57	51.3514	28	83	74.7748	2	109	98.1982	0	111	100	0	111	100	0	111	100
Class III A	NIC1786	7.7		56	56	0	0	56	0	0	56	0	0	55	1	1.78571	54	2	3.57143	54	2	3.57143	18	38	67.8571	0	56	100	0	56	100	0	56	100	0	56	100
Class III B	JU2587	5.8		55	52	3	5.45455	52	3	5.45455	52	3	5.45455	45	10	18.1818	44	11	20	25	30	54.5455	11	44	80	0	55	100	0	55	100	0	55	100	0	55	100
Class III B	JU2593	5.2		38	30	8	21.0526	30	8	21.0526	26	12	31.5789	20	18	47.3684	12	26	68.4211	5	33	86.8421	1	37	97.3684	0	38	100	0	38	100	0	38	100	0	38	100
Class III B	JU751	4.9		59	59	0	0	59	0	0	59	0	0	52	7	11.8644	25	34	57.6271	6	53	89.8305	1	58	98.3051	0	59	100	0	59	100	0	59	100	0	59	100
Class III B	NIC1832	7.6		40	38	2	5	37	3	7.5	34	6	15	34	6	15	34	6	15	34	6	15	10	30	75	0	40	100	0	40	100	0	40	100	0	40	100

## Sheet: Figure 12C
RAW DATA									SUMMARY DATA
Class	Strain	Total number of animals surveyed	Time point after egg-laying (h)	Number of mature animals	Cumulative number of mature animals	Cumulative percentage of mature animals			Class	Strain	Estimate: time point at which 50% of individuals had reached reproductive maturity
Class II	CB4856	133	46	0	0	0			Class I	JU3166	52.5353
Class II	CB4856	133	47	5	5	3.7594			Class I	QG2873	53.4141
Class II	CB4856	133	48	0	5	3.7594			Class II	CB4856	53.2
Class II	CB4856	133	50	2	7	5.26316			Class II	JU1200	52.9259
Class II	CB4856	133	52	11	18	13.5338			Class II	N2	54
Class II	CB4856	133	53	44	62	46.6165			Class II	QX1430	55.0919
Class II	CB4856	133	55	50	112	84.2105			Class III A	ED3005	54.1985
Class II	CB4856	133	57	21	133	100			Class III A	JU2829	48.141
Class III A	ED3005	147	47	0	0	0			Class III A	JU440	52.4376
Class III A	ED3005	147	49	0	0	0			Class III A	JU830	51.0221
Class III A	ED3005	147	50	0	0	0			Class III A	NIC1786	54
Class III A	ED3005	147	51	1	1	0.680272			Class III B	JU2587	51.4191
Class III A	ED3005	147	52	1	2	1.36054			Class III B	JU2593	47.2
Class III A	ED3005	147	54	40	42	28.5714			Class III B	JU751	46.6763
Class III A	ED3005	147	55	57	97	65.9864			Class III B	NIC1832	50.3272
Class III A	ED3005	147	57	50	147	100
Class II	JU1200	242	47	8	8	3.30579
Class II	JU1200	242	49	8	16	6.61157
Class II	JU1200	242	52	57	73	30.1653
Class II	JU1200	242	54	39	112	46.281
Class II	JU1200	242	55	39	231	95.4545
Class III B	JU2587	111	47	5	5	4.5045
Class III B	JU2587	111	49	5	10	9.00901
Class III B	JU2587	111	50	4	14	12.6126
Class III B	JU2587	111	51	17	31	27.9279
Class III B	JU2587	111	52	33	64	57.6577
Class III B	JU2587	111	54	34	98	88.2883
Class III B	JU2593	84	46	14	14	16.6667
Class III B	JU2593	84	47	24	38	45.2381
Class III B	JU2593	84	48	21	59	70.2381
Class III B	JU2593	84	50	13	72	85.7143
Class III B	JU2593	84	52	12	84	100
Class III A	JU2829	145	47	14	14	9.65517
Class III A	JU2829	145	49	54	68	46.8966
Class III A	JU2829	145	52	64	132	91.0345
Class I	JU3166	124	47	2	2	1.6129
Class I	JU3166	124	49	0	2	1.6129
Class I	JU3166	124	52	12	14	11.2903
Class I	JU3166	124	54	56	70	56.4516
Class I	JU3166	124	55	39	109	87.9032
Class I	JU3166	124	56	13	122	98.3871
Class I	JU3166	124	57	13	122	98.3871
Class III A	JU440	154	47	4	4	2.5974
Class III A	JU440	154	49	1	5	3.24675
Class III A	JU440	154	52	5	10	6.49351
Class III A	JU440	154	54	83	93	60.3896
Class III A	JU440	154	55	48	141	91.5584
Class III B	JU751	158	47	64	64	40.5063
Class III B	JU751	158	49	39	103	65.1899
Class III B	JU751	158	52	49	152	96.2025
Class III A	JU830	152	47	3	3	1.97368
Class III A	JU830	152	49	0	3	1.97368
Class III A	JU830	152	50	12	15	9.86842
Class III A	JU830	152	51	42	57	37.5
Class III A	JU830	152	52	43	100	65.7895
Class III A	JU830	152	54	45	145	95.3947
Class II	N2	169	47	0	0	0
Class II	N2	84	47	1	1	1.19048
Class II	N2	84	48	0	1	1.19048
Class II	N2	169	49	0	0	0
Class II	N2	169	50	0	0	0
Class II	N2	84	50	9	10	11.9048
Class II	N2	169	51	3	3	1.77515
Class II	N2	84	52	3	13	15.4762
Class II	N2	169	52	5	8	4.73373
Class II	N2	84	53	6	19	22.619
Class II	N2	169	54	61	69	40.8284
Class II	N2	84	55	43	62	73.8095
Class II	N2	169	55	48	109	64.497
Class II	N2	84	57	22	84	100
Class II	N2	169	57	60	169	100
Class II	N2	65	47	0	0	0
Class II	N2	65	49	0	0	0
Class II	N2	65	52	4	4	6.15385
Class II	N2	65	54	1	5	7.69231
Class II	N2	65	55	18	23	35.3846
Class II	N2	65	56	29	52	80
Class II	N2	65	57	10	62	95.3846
Class III A	NIC1786	104	46	0	0	0
Class III A	NIC1786	104	47	1	1	0.961538
Class III A	NIC1786	104	48	1	2	1.92308
Class III A	NIC1786	104	50	3	5	4.80769
Class III A	NIC1786	104	52	6	13	12.5
Class III A	NIC1786	104	53	16	29	27.8846
Class III A	NIC1786	104	55	48	77	74.0385
Class III A	NIC1786	104	57	27	104	100
Class III B	NIC1832	113	47	9	9	7.9646
Class III B	NIC1832	113	49	8	17	15.0442
Class III B	NIC1832	113	50	16	33	29.2035
Class III B	NIC1832	113	51	37	70	61.9469
Class III B	NIC1832	113	52	7	77	68.1416
Class III B	NIC1832	113	54	26	103	91.1504
Class III B	NIC1832	113	55	10	113	100
Class II	QX1430	150	47	0	0	0
Class II	QX1430	150	49	0	0	0
Class II	QX1430	150	50	2	2	1.33333
Class II	QX1430	150	51	0	2	1.33333
Class II	QX1430	150	52	2	4	2.66667
Class II	QX1430	150	54	0	4	2.66667
Class II	QX1430	150	55	0	4	2.66667
Class II	QX1430	150	57	120	124	82.6667
Class II	QX1430	150	59	30	150	100
Class I	QG2873	77	47	3	3	3.8961
Class I	QG2873	77	49	1	4	5.19481
Class I	QG2873	77	52	0	4	5.19481
Class I	QG2873	77	54	5	9	11.6883
Class I	QG2873	77	55	38	47	61.039
Class I	QG2873	77	56	25	72	93.5065
Class I	QG2873	77	57	25	72	93.5065

## Sheet: Figure 12D
Experiment	Replicate (plate)	N total	N adults GFP
JU1200/N2-GFP	1	40	15
JU1200/N2-GFP	2	31	9
JU1200/N2-GFP	3	22	4
JU1200/N2-GFP	4	25	6
JU1200/N2-GFP	5	26	9
JU1200/N2-GFP	6	30	3
JU1200/N2-GFP	7	28	11
JU1200/N2-GFP	8	14	3
JU1200/N2-GFP	9	36	18
JU1200/N2-GFP	10	54	19
JU1200_Crispr/N2-GFP	1	56	1
JU1200_Crispr/N2-GFP	2	59	6
JU1200_Crispr/N2-GFP	3	47	5
JU1200_Crispr/N2-GFP	4	45	6
JU1200_Crispr/N2-GFP	5	43	5
JU1200_Crispr/N2-GFP	6	38	5
JU1200_Crispr/N2-GFP	7	54	0
JU1200_Crispr/N2-GFP	8	57	1
JU1200_Crispr/N2-GFP	9	48	3
JU1200_Crispr/N2-GFP	10	52	4

## Sheet: Figure 12E
Strain 1	Strain2	Replicate (plate)	N adults (JU751)	N adults (competing strain)	N adults total	Percentage adults JU751
JU751	JU651	1	42	12	54	77.7778
JU751	JU651	2	50	22	72	69.4444
JU751	JU651	3	36	32	68	52.9412
JU751	JU651	4	22	20	42	52.381
JU751	JU651	5	24	30	54	44.4444
JU751	JU651	6	30	22	52	57.6923
JU751	JU651	7	34	24	58	58.6207
JU751	JU651	8	56	12	68	82.3529
JU751	JU651	9	32	18	50	64
JU751	JU651	10	44	16	60	73.3333
JU751	JU814	1	38	10	48	79.1667
JU751	JU814	2	31	29	60	51.6667
JU751	JU814	3	42	17	59	71.1864
JU751	JU814	4	51	8	59	86.4407
JU751	JU814	5	32	23	55	58.1818
JU751	JU814	6	31	28	59	52.5424
JU751	JU814	7	43	21	64	67.1875
JU751	JU814	8	44	16	60	73.3333
JU751	JU814	9	38	31	69	55.0725
JU751	JU814	10	46	31	77	59.7403
JU751	JU660	1	15	22	37	40.5405
JU751	JU660	2	24	21	45	53.3333
JU751	JU660	3	28	26	54	51.8519
JU751	JU660	4	32	20	52	61.5385
JU751	JU660	5	43	10	53	81.1321
JU751	JU660	6	54	12	66	81.8182
JU751	JU660	7	40	12	52	76.9231
JU751	JU660	8	28	9	37	75.6757
JU751	JU660	9	48	10	58	82.7586
JU751	JU660	10	32	22	54	59.2593
JU751	JU820	1	32	6	38	84.2105
JU751	JU820	2	30	21	51	58.8235
JU751	JU820	3	17	20	37	45.9459
JU751	JU820	4	40	6	46	86.9565
JU751	JU820	5	33	11	44	75
JU751	JU820	6	22	13	35	62.8571
JU751	JU820	7	24	24	48	50
JU751	JU820	8	32	26	58	55.1724
JU751	JU820	9	43	6	49	87.7551
JU751	JU820	10	15	24	39	38.4615
JU751	JU822	1	18	12	30	60
JU751	JU822	2	20	28	48	41.6667
JU751	JU822	3	34	28	62	54.8387
JU751	JU822	4	33	13	46	71.7391
JU751	JU822	5	31	9	40	77.5
JU751	JU822	6	24	13	37	64.8649
JU751	JU822	7	26	12	38	68.4211
JU751	JU822	8	30	14	44	68.1818
JU751	JU822	9	19	16	35	54.2857
JU751	JU822	10	44	16	60	73.3333
