# Supplementary material for: Natural variation in the Caenorhabditis elegans egg-laying circuit modulates an intergenerational fitness trade-off
Source: eLife. 2024 Apr 2;12:RP88253. doi: 10.7554/eLife.88253 (PMC10987095; doi:10.7554/eLife.88253)
Supplement: Figure 13—source data 1. [file elife-88253-fig13-data1.xlsx]

## Sheet: Figure 13A and supplement 1A
Strain	Treatment	Exposure ex or in utero	Alive larvae / 10 mothers
JU2587	M9	Ex utero	151
JU2587	M9	Ex utero	272
JU2587	M9	Ex utero	250
JU2587	M9	Ex utero	180
JU2587	M9	Ex utero	223
JU2587	EtOH 96%	Ex utero	10
JU2587	EtOH 96%	Ex utero	7
JU2587	EtOH 96%	Ex utero	2
JU2587	EtOH 96%	Ex utero	0
JU2587	EtOH 96%	Ex utero	5
JU2587	EtOH 96%	In utero	9
JU2587	EtOH 96%	In utero	17
JU2587	EtOH 96%	In utero	55
JU2587	EtOH 96%	In utero	14
JU2587	EtOH 96%	In utero	12
JU830	M9	Ex utero	265
JU830	M9	Ex utero	349
JU830	M9	Ex utero	386
JU830	M9	Ex utero	271
JU830	M9	Ex utero	278
JU830	EtOH 96%	Ex utero	10
JU830	EtOH 96%	Ex utero	18
JU830	EtOH 96%	Ex utero	12
JU830	EtOH 96%	Ex utero	27
JU830	EtOH 96%	Ex utero	9
JU830	EtOH 96%	In utero	69
JU830	EtOH 96%	In utero	147
JU830	EtOH 96%	In utero	39
JU830	EtOH 96%	In utero	110
JU830	EtOH 96%	In utero	73
N2	M9	Ex utero	177
N2	M9	Ex utero	157
N2	M9	Ex utero	172
N2	M9	Ex utero	165
N2	M9	Ex utero	44
N2	EtOH 96%	Ex utero	14
N2	EtOH 96%	Ex utero	17
N2	EtOH 96%	Ex utero	55
N2	EtOH 96%	Ex utero	44
N2	EtOH 96%	Ex utero	14
N2	EtOH 96%	In utero	34
N2	EtOH 96%	In utero	65
N2	EtOH 96%	In utero	42
N2	EtOH 96%	In utero	30
N2	EtOH 96%	In utero	25
CB4856	M9	Ex utero	140
CB4856	M9	Ex utero	106
CB4856	M9	Ex utero	86
CB4856	M9	Ex utero	130
CB4856	M9	Ex utero	84
CB4856	EtOH 96%	Ex utero	7
CB4856	EtOH 96%	Ex utero	17
CB4856	EtOH 96%	Ex utero	18
CB4856	EtOH 96%	Ex utero	12
CB4856	EtOH 96%	Ex utero	5
CB4856	EtOH 96%	In utero	19
CB4856	EtOH 96%	In utero	18
CB4856	EtOH 96%	In utero	28
CB4856	EtOH 96%	In utero	23
CB4856	EtOH 96%	In utero	46
JU751	M9	Ex utero	363
JU751	M9	Ex utero	271
JU751	M9	Ex utero	272
JU751	M9	Ex utero	284
JU751	M9	Ex utero	320
JU751	EtOH 96%	Ex utero	23
JU751	EtOH 96%	Ex utero	26
JU751	EtOH 96%	Ex utero	30
JU751	EtOH 96%	Ex utero	17
JU751	EtOH 96%	Ex utero	11
JU751	EtOH 96%	In utero	134
JU751	EtOH 96%	In utero	137
JU751	EtOH 96%	In utero	123
JU751	EtOH 96%	In utero	117
JU751	EtOH 96%	In utero	97
JU1200	M9	Ex utero	156
JU1200	M9	Ex utero	161
JU1200	M9	Ex utero	140
JU1200	M9	Ex utero	139
JU1200	M9	Ex utero	147
JU1200	EtOH 96%	Ex utero	36
JU1200	EtOH 96%	Ex utero	35
JU1200	EtOH 96%	Ex utero	33
JU1200	EtOH 96%	Ex utero	14
JU1200	EtOH 96%	Ex utero	15
JU1200	EtOH 96%	In utero	29
JU1200	EtOH 96%	In utero	26
JU1200	EtOH 96%	In utero	39
JU1200	EtOH 96%	In utero	36
JU1200	EtOH 96%	In utero	60
JU2829	M9	Ex utero	321
JU2829	M9	Ex utero	289
JU2829	M9	Ex utero	334
JU2829	M9	Ex utero	351
JU2829	M9	Ex utero	301
JU2829	EtOH 96%	Ex utero	16
JU2829	EtOH 96%	Ex utero	13
JU2829	EtOH 96%	Ex utero	3
JU2829	EtOH 96%	Ex utero	5
JU2829	EtOH 96%	Ex utero	11
JU2829	EtOH 96%	In utero	57
JU2829	EtOH 96%	In utero	106
JU2829	EtOH 96%	In utero	20
JU2829	EtOH 96%	In utero	82
JU2829	EtOH 96%	In utero	56
JU1366	M9	Ex utero	72
JU1366	M9	Ex utero	77
JU1366	M9	Ex utero	54
JU1366	M9	Ex utero	61
JU1366	M9	Ex utero	67
JU1366	EtOH 96%	Ex utero	23
JU1366	EtOH 96%	Ex utero	9
JU1366	EtOH 96%	Ex utero	4
JU1366	EtOH 96%	Ex utero	10
JU1366	EtOH 96%	Ex utero	11
JU1366	EtOH 96%	In utero	27
JU1366	EtOH 96%	In utero	11
JU1366	EtOH 96%	In utero	12
JU1366	EtOH 96%	In utero	1
JU1366	EtOH 96%	In utero	5
N2	M9	Ex utero	161
N2	M9	Ex utero	159
N2	M9	Ex utero	170
N2	M9	Ex utero	168
N2	M9	Ex utero	98
N2	EtOH 96%	Ex utero	32
N2	EtOH 96%	Ex utero	19
N2	EtOH 96%	Ex utero	41
N2	EtOH 96%	Ex utero	15
N2	EtOH 96%	Ex utero	25
N2	EtOH 96%	In utero	52
N2	EtOH 96%	In utero	58
N2	EtOH 96%	In utero	35
N2	EtOH 96%	In utero	29
N2	EtOH 96%	In utero	40

## Sheet: Figure 13B and supplement 1B
Strain	Treatment	Exposure ex or in utero	Alive larvae / 10 mothers
N2	M9	Ex utero	116
N2	M9	Ex utero	132
N2	M9	Ex utero	243
N2	M9	Ex utero	200
N2	M9	Ex utero	311
N2	10MAceticacid	Ex utero	15
N2	10MAceticacid	Ex utero	24
N2	10MAceticacid	Ex utero	60
N2	10MAceticacid	Ex utero	37
N2	10MAceticacid	Ex utero	31
N2	10MAceticacid	In utero	105
N2	10MAceticacid	In utero	216
N2	10MAceticacid	In utero	146
N2	10MAceticacid	In utero	180
N2	10MAceticacid	In utero	158
CB4856	M9	Ex utero	108
CB4856	M9	Ex utero	96
CB4856	M9	Ex utero	136
CB4856	M9	Ex utero	92
CB4856	M9	Ex utero	145
CB4856	10MAceticacid	Ex utero	2
CB4856	10MAceticacid	Ex utero	2
CB4856	10MAceticacid	Ex utero	14
CB4856	10MAceticacid	Ex utero	4
CB4856	10MAceticacid	Ex utero	0
CB4856	10MAceticacid	In utero	48
CB4856	10MAceticacid	In utero	34
CB4856	10MAceticacid	In utero	39
CB4856	10MAceticacid	In utero	41
CB4856	10MAceticacid	In utero	52
JU1200	M9	Ex utero	167
JU1200	M9	Ex utero	142
JU1200	M9	Ex utero	134
JU1200	M9	Ex utero	143
JU1200	M9	Ex utero	143
JU1200	10MAceticacid	Ex utero	2
JU1200	10MAceticacid	Ex utero	0
JU1200	10MAceticacid	Ex utero	0
JU1200	10MAceticacid	Ex utero	1
JU1200	10MAceticacid	Ex utero	2
JU1200	10MAceticacid	In utero	112
JU1200	10MAceticacid	In utero	98
JU1200	10MAceticacid	In utero	102
JU1200	10MAceticacid	In utero	87
JU1200	10MAceticacid	In utero	121
JU2587	M9	Ex utero	274
JU2587	M9	Ex utero	307
JU2587	M9	Ex utero	387
JU2587	M9	Ex utero	372
JU2587	M9	Ex utero	313
JU2587	10MAceticacid	Ex utero	53
JU2587	10MAceticacid	Ex utero	18
JU2587	10MAceticacid	Ex utero	30
JU2587	10MAceticacid	Ex utero	46
JU2587	10MAceticacid	Ex utero	12
JU2587	10MAceticacid	In utero	207
JU2587	10MAceticacid	In utero	257
JU2587	10MAceticacid	In utero	304
JU2587	10MAceticacid	In utero	287
JU2587	10MAceticacid	In utero	310
JU2829	M9	Ex utero	351
JU2829	M9	Ex utero	276
JU2829	M9	Ex utero	330
JU2829	M9	Ex utero	329
JU2829	M9	Ex utero	282
JU2829	10MAceticacid	Ex utero	45
JU2829	10MAceticacid	Ex utero	45
JU2829	10MAceticacid	Ex utero	81
JU2829	10MAceticacid	Ex utero	2
JU2829	10MAceticacid	Ex utero	10
JU2829	10MAceticacid	In utero	201
JU2829	10MAceticacid	In utero	136
JU2829	10MAceticacid	In utero	187
JU2829	10MAceticacid	In utero	158
JU2829	10MAceticacid	In utero	202
JU3166	M9	Ex utero	77
JU3166	M9	Ex utero	54
JU3166	M9	Ex utero	84
JU3166	M9	Ex utero	78
JU3166	M9	Ex utero	57
JU3166	10MAceticacid	Ex utero	1
JU3166	10MAceticacid	Ex utero	0
JU3166	10MAceticacid	Ex utero	0
JU3166	10MAceticacid	Ex utero	0
JU3166	10MAceticacid	Ex utero	0
JU3166	10MAceticacid	In utero	11
JU3166	10MAceticacid	In utero	22
JU3166	10MAceticacid	In utero	13
JU3166	10MAceticacid	In utero	20
JU3166	10MAceticacid	In utero	10
JU751	M9	Ex utero	297
JU751	M9	Ex utero	216
JU751	M9	Ex utero	301
JU751	M9	Ex utero	369
JU751	M9	Ex utero	275
JU751	10MAceticacid	Ex utero	13
JU751	10MAceticacid	Ex utero	6
JU751	10MAceticacid	Ex utero	28
JU751	10MAceticacid	Ex utero	3
JU751	10MAceticacid	Ex utero	24
JU751	10MAceticacid	In utero	154
JU751	10MAceticacid	In utero	167
JU751	10MAceticacid	In utero	203
JU751	10MAceticacid	In utero	126
JU751	10MAceticacid	In utero	180
JU830	M9	Ex utero	346
JU830	M9	Ex utero	349
JU830	M9	Ex utero	344
JU830	M9	Ex utero	326
JU830	M9	Ex utero	380
JU830	10MAceticacid	Ex utero	4
JU830	10MAceticacid	Ex utero	9
JU830	10MAceticacid	Ex utero	0
JU830	10MAceticacid	Ex utero	11
JU830	10MAceticacid	Ex utero	6
JU830	10MAceticacid	In utero	143
JU830	10MAceticacid	In utero	210
JU830	10MAceticacid	In utero	198
JU830	10MAceticacid	In utero	201
JU830	10MAceticacid	In utero	184
