# Supplementary material for: Natural variation in the Caenorhabditis elegans egg-laying circuit modulates an intergenerational fitness trade-off
Source: eLife. 2024 Apr 2;12:RP88253. doi: 10.7554/eLife.88253 (PMC10987095; doi:10.7554/eLife.88253)
Supplement: Figure 14—source data 1. [file elife-88253-fig14-data1.xlsx]

## Sheet: Figure 14A and supplement 1
Strain	Treatment	Exposure ex or in utero	Alive larvae / 10 mothers	Alive larvae / 1 mother
JU751	M9	Ex utero	312	31.2
JU751	M9	Ex utero	290	29
JU751	M9	Ex utero	333	33.3
JU751	M9	Ex utero	352	35.2
JU751	M9	Ex utero	326	32.6
JU751	10M Acetic acid	Ex utero	10	1
JU751	10M Acetic acid	Ex utero	2	0.2
JU751	10M Acetic acid	Ex utero	3	0.3
JU751	10M Acetic acid	Ex utero	6	0.6
JU751	10M Acetic acid	Ex utero	4	0.4
JU751	10M Acetic acid	In utero	93	9.3
JU751	10M Acetic acid	In utero	67	6.7
JU751	10M Acetic acid	In utero	106	10.6
JU751	10M Acetic acid	In utero	89	8.9
JU751	10M Acetic acid	In utero	101	10.1
JU651	M9	Ex utero	123	12.3
JU651	M9	Ex utero	137	13.7
JU651	M9	Ex utero	121	12.1
JU651	M9	Ex utero	110	11
JU651	M9	Ex utero	118	11.8
JU651	10M Acetic acid	Ex utero	7	0.7
JU651	10M Acetic acid	Ex utero	4	0.4
JU651	10M Acetic acid	Ex utero	0	0
JU651	10M Acetic acid	Ex utero	3	0.3
JU651	10M Acetic acid	Ex utero	2	0.2
JU651	10M Acetic acid	In utero	34	3.4
JU651	10M Acetic acid	In utero	28	2.8
JU651	10M Acetic acid	In utero	19	1.9
JU651	10M Acetic acid	In utero	23	2.3
JU651	10M Acetic acid	In utero	31	3.1
JU660	M9	Ex utero	124	12.4
JU660	M9	Ex utero	109	10.9
JU660	M9	Ex utero	115	11.5
JU660	M9	Ex utero	87	8.7
JU660	M9	Ex utero	121	12.1
JU660	10M Acetic acid	Ex utero	1	0.1
JU660	10M Acetic acid	Ex utero	7	0.7
JU660	10M Acetic acid	Ex utero	5	0.5
JU660	10M Acetic acid	Ex utero	2	0.2
JU660	10M Acetic acid	Ex utero	3	0.3
JU660	10M Acetic acid	In utero	32	3.2
JU660	10M Acetic acid	In utero	51	5.1
JU660	10M Acetic acid	In utero	46	4.6
JU660	10M Acetic acid	In utero	41	4.1
JU660	10M Acetic acid	In utero	52	5.2
JU814	M9	Ex utero	99	9.9
JU814	M9	Ex utero	70	7
JU814	M9	Ex utero	121	12.1
JU814	M9	Ex utero	134	13.4
JU814	M9	Ex utero	108	10.8
JU814	10M Acetic acid	Ex utero	0	0
JU814	10M Acetic acid	Ex utero	2	0.2
JU814	10M Acetic acid	Ex utero	0	0
JU814	10M Acetic acid	Ex utero	3	0.3
JU814	10M Acetic acid	Ex utero	5	0.5
JU814	10M Acetic acid	In utero	42	4.2
JU814	10M Acetic acid	In utero	3	0.3
JU814	10M Acetic acid	In utero	24	2.4
JU814	10M Acetic acid	In utero	31	3.1
JU814	10M Acetic acid	In utero	15	1.5
JU822	M9	Ex utero	134	13.4
JU822	M9	Ex utero	127	12.7
JU822	M9	Ex utero	119	11.9
JU822	M9	Ex utero	126	12.6
JU822	M9	Ex utero	118	11.8
JU822	10M Acetic acid	Ex utero	1	0.1
JU822	10M Acetic acid	Ex utero	2	0.2
JU822	10M Acetic acid	Ex utero	0	0
JU822	10M Acetic acid	Ex utero	4	0.4
JU822	10M Acetic acid	Ex utero	3	0.3
JU822	10M Acetic acid	In utero	44	4.4
JU822	10M Acetic acid	In utero	39	3.9
JU822	10M Acetic acid	In utero	48	4.8
JU822	10M Acetic acid	In utero	29	2.9
JU822	10M Acetic acid	In utero	18	1.8

## Sheet: Figure 14B
Background	Genotype KCNL-1	Treatment	Individual	Live offspring per animal
JU1200	WT	Ex utero	1	2
JU1200	WT	Ex utero	2	3
JU1200	WT	Ex utero	3	3
JU1200	WT	Ex utero	4	1
JU1200	WT	Ex utero	5	0
JU1200	WT	Ex utero	6	2
JU1200	WT	Ex utero	7	1
JU1200	WT	Ex utero	8	3
JU1200	WT	Ex utero	9	2
JU1200	WT	Ex utero	10	1
JU1200	WT	In utero	1	11
JU1200	WT	In utero	2	2
JU1200	WT	In utero	3	12
JU1200	WT	In utero	4	5
JU1200	WT	In utero	5	11
JU1200	WT	In utero	6	12
JU1200	WT	In utero	7	8
JU1200	WT	In utero	8	7
JU1200	WT	In utero	9	11
JU1200	WT	In utero	10	10
JU1200	V530L	Ex utero	1	6
JU1200	V530L	Ex utero	2	5
JU1200	V530L	Ex utero	3	3
JU1200	V530L	Ex utero	4	6
JU1200	V530L	Ex utero	5	5
JU1200	V530L	Ex utero	6	8
JU1200	V530L	Ex utero	7	3
JU1200	V530L	Ex utero	8	3
JU1200	V530L	Ex utero	9	5
JU1200	V530L	Ex utero	10	5
JU1200	V530L	In utero	1	31
JU1200	V530L	In utero	2	35
JU1200	V530L	In utero	3	40
JU1200	V530L	In utero	4	35
JU1200	V530L	In utero	5	33
JU1200	V530L	In utero	6	28
JU1200	V530L	In utero	7	32
JU1200	V530L	In utero	8	39
JU1200	V530L	In utero	9	27
JU1200	V530L	In utero	10	41

## Sheet: Figure 14C
Individual	Exposed ex or In utero	Live larvae
1	In utero	8
2	In utero	7
3	In utero	0
4	In utero	10
5	In utero	7
6	In utero	12
7	In utero	8
8	In utero	15
9	In utero	2
10	In utero	5
1	Ex utero	0
2	Ex utero	0
3	Ex utero	0
4	Ex utero	0
5	Ex utero	0
6	Ex utero	0
7	Ex utero	0
8	Ex utero	0
9	Ex utero	0
10	Ex utero	0
