# Supplementary material for: Natural variation in the Caenorhabditis elegans egg-laying circuit modulates an intergenerational fitness trade-off
Source: eLife. 2024 Apr 2;12:RP88253. doi: 10.7554/eLife.88253 (PMC10987095; doi:10.7554/eLife.88253)
Supplement: Figure 15—source data 1. [file elife-88253-fig15-data1.xlsx]

## Sheet: Figure 15A
Treatment	Concentration NaCl	Total embryos	Number of dead embryos
Control	0	161	49
NaCl	300mM	288	131
NaCl	500mM	155	150
NaCl	1M	120	120

## Sheet: Figure 15B
Concentration NaCl	Individual	Exposure ex or in utero	Lifetime offspring
0.05M (M9-Control)	1	Ex utero	238
0.05M (M9-Control)	2	Ex utero	197
0.05M (M9-Control)	3	Ex utero	208
0.05M (M9-Control)	4	Ex utero	265
0.05M (M9-Control)	5	Ex utero	176
0.05M (M9-Control)	6	Ex utero	177
0.05M (M9-Control)	7	Ex utero	202
0.05M (M9-Control)	8	Ex utero	245
0.05M (M9-Control)	9	Ex utero	217
0.05M (M9-Control)	10	Ex utero	196
0.05M (M9-Control)	11	Ex utero	176
0.05M (M9-Control)	12	Ex utero	241
0.05M (M9-Control)	13	Ex utero	212
0.05M (M9-Control)	14	Ex utero	189
0.05M (M9-Control)	15	Ex utero	195
0.05M (M9-Control)	16	Ex utero	218
0.05M (M9-Control)	17	Ex utero	190
0.05M (M9-Control)	18	Ex utero	241
0.05M (M9-Control)	19	Ex utero	222
0.05M (M9-Control)	20	Ex utero	195
0.3M	1	Ex utero	0
0.3M	2	Ex utero	47
0.3M	3	Ex utero	0
0.3M	4	Ex utero	0
0.3M	5	Ex utero	52
0.3M	6	Ex utero	0
0.3M	7	Ex utero	111
0.3M	8	Ex utero	125
0.3M	9	Ex utero	187
0.3M	10	Ex utero	2
0.3M	11	Ex utero	262
0.3M	13	Ex utero	208
0.3M	14	Ex utero	177
0.3M	15	Ex utero	216
0.3M	16	Ex utero	262
0.3M	17	Ex utero	261
0.3M	18	Ex utero	209
0.3M	19	Ex utero	44
0.3M	1	In utero	204
0.3M	2	In utero	33
0.3M	3	In utero	189
0.3M	4	In utero	151
0.3M	5	In utero	232
0.3M	6	In utero	213
0.3M	8	In utero	103
0.3M	9	In utero	237
0.3M	10	In utero	194
0.3M	11	In utero	221
0.3M	12	In utero	201
0.3M	13	In utero	183
0.3M	14	In utero	186
0.3M	15	In utero	224
0.3M	16	In utero	232
0.3M	17	In utero	239
0.3M	18	In utero	252
0.3M	19	In utero	283
0.3M	20	In utero	200

## Sheet: Figure 15C
Strain	Treatment	Exposed ex or in utero	Individual	# of offspring at the L3 stage	# of offspring at the eL4 stage	# of offspring at the mL4 stage	# of offspring at the lL4 stage	# of offspring at the Adult stage	Total Score	Total N	Mean Score
JU751	Control (M9)	Ex utero	1	2	12	12	10	0	102	36	2.83333
JU751	Control (M9)	Ex utero	2	0	6	24	6	0	108	36	3
JU751	Control (M9)	Ex utero	3	0	9	1	12	1	74	23	3.21739
JU751	Control (M9)	Ex utero	4	4	14	4	18	2	126	42	3
JU751	Control (M9)	Ex utero	5	2	8	5	18	0	105	33	3.18182
JU751	Control (M9)	Ex utero	6	0	5	7	17	0	99	29	3.41379
JU751	Control (M9)	Ex utero	7	0	16	10	18	0	134	44	3.04545
JU751	Control (M9)	Ex utero	8	0	5	11	17	2	121	35	3.45714
JU751	Control (M9)	Ex utero	9	3	5	6	15	3	106	32	3.3125
JU751	Control (M9)	Ex utero	10	0	4	12	10	8	124	34	3.64706
JU751	Control (M9)	Ex utero	11	3	9	8	12	1	98	33	2.9697
JU751	Control (M9)	Ex utero	12	3	10	8	19	0	123	40	3.075
JU751	Control (M9)	Ex utero	13	2	10	2	20	0	108	34	3.17647
JU751	Control (M9)	Ex utero	14	4	10	12	4	0	76	30	2.53333
JU751	Control (M9)	Ex utero	15	0	8	8	4	4	76	24	3.16667
JU751	Control (M9)	Ex utero	16	0	12	16	16	4	156	48	3.25
JU751	Control (M9)	Ex utero	17	2	9	12	16	0	120	39	3.07692
JU751	Control (M9)	Ex utero	18	0	3	13	11	0	89	27	3.2963
JU751	Control (M9)	Ex utero	19	2	8	8	6	4	86	28	3.07143
JU751	Control (M9)	Ex utero	20	2	8	8	24	2	148	44	3.36364
JU751	Control (M9)	Ex utero	21	0	9	12	19	0	130	40	3.25
JU751	Control (M9)	Ex utero	22	2	9	3	21	0	113	35	3.22857
JU751	Control (M9)	Ex utero	23	0	14	4	17	1	113	36	3.13889
JU751	Control (M9)	Ex utero	24	1	15	15	13	0	128	44	2.90909
JU751	Control (M9)	Ex utero	25	3	4	7	14	3	103	31	3.32258
JU751	Control (M9)	Ex utero	26	0	4	7	15	1	94	27	3.48148
JU751	Control (M9)	Ex utero	27	2	10	12	6	0	82	30	2.73333
JU751	Control (M9)	Ex utero	28	0	5	7	18	0	103	30	3.43333
JU751	Control (M9)	Ex utero	29	0	4	7	18	0	101	29	3.48276
JU751	Control (M9)	Ex utero	30	2	11	8	20	0	128	41	3.12195
JU751	Acetic acid 1M	Ex utero	1	6	7	11	8	0	85	32	2.65625
JU751	Acetic acid 1M	Ex utero	2	1	16	7	1	0	58	25	2.32
JU751	Acetic acid 1M	Ex utero	3	6	0	0	3	0	18	9	2
JU751	Acetic acid 1M	Ex utero	4	3	17	9	2	0	72	31	2.32258
JU751	Acetic acid 1M	Ex utero	5	4	17	10	2	0	76	33	2.30303
JU751	Acetic acid 1M	Ex utero	6	3	16	8	3	0	71	30	2.36667
JU751	Acetic acid 1M	Ex utero	7	3	16	11	3	0	80	33	2.42424
JU751	Acetic acid 1M	Ex utero	8	4	11	14	3	0	80	32	2.5
JU751	Acetic acid 1M	Ex utero	9	2	22	8	2	0	78	34	2.29412
JU751	Acetic acid 1M	Ex utero	10	0	15	16	0	0	78	31	2.51613
JU751	Acetic acid 1M	Ex utero	11	0	7	8	2	0	46	17	2.70588
JU751	Acetic acid 1M	Ex utero	12	4	20	11	1	0	81	36	2.25
JU751	Acetic acid 1M	Ex utero	13	1	5	3	3	0	32	12	2.66667
JU751	Acetic acid 1M	Ex utero	14	12	14	16	2	0	96	44	2.18182
JU751	Acetic acid 1M	Ex utero	15	4	23	11	3	0	95	41	2.31707
JU751	Acetic acid 1M	Ex utero	16	4	20	9	2	0	79	35	2.25714
JU751	Acetic acid 1M	Ex utero	17	3	13	5	0	0	44	21	2.09524
JU751	Acetic acid 1M	Ex utero	18	5	12	4	1	0	45	22	2.04545
JU751	Acetic acid 1M	Ex utero	19	2	0	3	15	0	71	20	3.55
JU751	Acetic acid 1M	Ex utero	20	1	20	15	1	0	90	37	2.43243
JU751	Acetic acid 1M	Ex utero	21	2	17	7	3	0	69	29	2.37931
JU751	Acetic acid 1M	Ex utero	22	2	21	15	1	0	93	39	2.38462
JU751	Acetic acid 1M	Ex utero	23	1	13	4	2	0	47	20	2.35
JU751	Acetic acid 1M	Ex utero	24	4	9	5	2	0	45	20	2.25
JU751	Acetic acid 1M	Ex utero	25	0	14	4	0	0	40	18	2.22222
JU751	Acetic acid 1M	Ex utero	26	2	15	9	1	0	63	27	2.33333
JU751	Acetic acid 1M	Ex utero	27	2	19	8	0	0	64	29	2.2069
JU751	Acetic acid 1M	Ex utero	28	2	15	6	2	0	58	25	2.32
JU751	Acetic acid 1M	Ex utero	29	1	22	13	8	1	121	45	2.68889
JU751	Acetic acid 1M	Ex utero	30	0	17	9	1	0	65	27	2.40741
JU751	Acetic acid 1M	In utero	1	3	10	14	9	10	151	46	3.28261
JU751	Acetic acid 1M	In utero	2	2	16	14	20	5	181	57	3.17544
JU751	Acetic acid 1M	In utero	3	5	14	11	12	3	129	45	2.86667
JU751	Acetic acid 1M	In utero	4	4	7	5	10	1	78	27	2.88889
JU751	Acetic acid 1M	In utero	5	1	13	11	12	0	108	37	2.91892
JU751	Acetic acid 1M	In utero	6	0	8	0	8	8	88	24	3.66667
JU751	Acetic acid 1M	In utero	7	2	9	9	4	3	78	27	2.88889
JU751	Acetic acid 1M	In utero	8	2	12	5	12	2	99	33	3
JU751	Acetic acid 1M	In utero	9	4	16	13	19	0	151	52	2.90385
JU751	Acetic acid 1M	In utero	10	0	8	8	20	0	120	36	3.33333
JU751	Acetic acid 1M	In utero	11	2	13	13	12	1	120	41	2.92683
JU751	Acetic acid 1M	In utero	12	2	17	11	14	0	125	44	2.84091
JU751	Acetic acid 1M	In utero	13	1	14	1	13	0	84	29	2.89655
JU751	Acetic acid 1M	In utero	14	2	7	8	10	0	80	27	2.96296
JU751	Acetic acid 1M	In utero	15	1	14	12	14	0	121	41	2.95122
JU751	Acetic acid 1M	In utero	16	0	2	4	11	0	60	17	3.52941
JU751	Acetic acid 1M	In utero	17	2	5	3	10	0	61	20	3.05
JU751	Acetic acid 1M	In utero	18	1	0	4	14	0	69	19	3.63158
JU751	Acetic acid 1M	In utero	19	0	7	6	11	1	81	25	3.24
JU751	Acetic acid 1M	In utero	20	6	8	10	12	10	150	46	3.26087
JU751	Acetic acid 1M	In utero	21	3	21	14	11	3	146	52	2.80769
JU751	Acetic acid 1M	In utero	22	1	2	12	15	0	101	30	3.36667
JU751	Acetic acid 1M	In utero	23	0	14	10	8	2	100	34	2.94118
JU751	Acetic acid 1M	In utero	24	1	4	7	14	1	91	27	3.37037
JU751	Acetic acid 1M	In utero	25	2	13	14	12	2	128	43	2.97674
JU751	Acetic acid 1M	In utero	26	2	11	5	13	1	96	32	3
JU751	Acetic acid 1M	In utero	27	0	5	6	12	1	81	24	3.375
JU751	Acetic acid 1M	In utero	28	2	13	8	14	0	108	37	2.91892
JU751	Acetic acid 1M	In utero	29	1	6	4	16	1	94	28	3.35714
JU751	Acetic acid 1M	In utero	30	0	12	8	11	2	102	33	3.09091

## Sheet: Figure 15D
Treatment group	Environment	Stage	Individual	Exposed ex or In utero	Day1 offspring	Day2 offspring	Day3 offspring	Total offspring
1	Control (M9)	Eggs	1	Ex utero	58	161	6	225
1	Control (M9)	Eggs	2	Ex utero	75	194	6	275
1	Control (M9)	Eggs	3	Ex utero	90	159	3	252
1	Control (M9)	Eggs	4	Ex utero	55	106	0	161
1	Control (M9)	Eggs	5	Ex utero	32	106	47	185
1	Control (M9)	Eggs	6	Ex utero	55	87	31	173
1	Control (M9)	Eggs	7	Ex utero	65	118	20	203
1	Control (M9)	Eggs	8	Ex utero	65	146	18	229
1	Control (M9)	Eggs	9	Ex utero	18	77	54	149
1	Control (M9)	Eggs	10	Ex utero	61	91	44	196
1	Control (M9)	Eggs	11	Ex utero	51	146	0	197
1	Control (M9)	Eggs	12	Ex utero	62	158	30	250
1	Control (M9)	Eggs	13	Ex utero	50	219	19	288
1	Control (M9)	Eggs	14	Ex utero	62	202	7	271
1	Control (M9)	Eggs	15	Ex utero	69	209	19	297
2	Acetic acid 1M	Eggs	1	Ex utero	0	0	0	0
2	Acetic acid 1M	Eggs	2	Ex utero	65	207	8	280
2	Acetic acid 1M	Eggs	3	Ex utero	24	180	15	219
2	Acetic acid 1M	Eggs	4	Ex utero	35	158	2	195
2	Acetic acid 1M	Eggs	5	Ex utero	40	150	22	212
2	Acetic acid 1M	Eggs	6	Ex utero	56	126	2	184
2	Acetic acid 1M	Eggs	7	Ex utero	41	151	17	209
2	Acetic acid 1M	Eggs	8	Ex utero	56	103	1	160
2	Acetic acid 1M	Eggs	9	Ex utero	42	144	11	197
2	Acetic acid 1M	Eggs	10	Ex utero	62	142	0	204
2	Acetic acid 1M	Eggs	11	Ex utero	62	147	20	229
2	Acetic acid 1M	Eggs	12	Ex utero	56	210	5	271
2	Acetic acid 1M	Eggs	13	Ex utero	51	175	8	234
2	Acetic acid 1M	Eggs	14	Ex utero	54	153	1	208
2	Acetic acid 1M	Eggs	15	Ex utero	83	125	3	211
3	Acetic acid 1M	Eggs	1	In utero	33	113	33	179
3	Acetic acid 1M	Eggs	2	In utero	41	132	9	182
3	Acetic acid 1M	Eggs	3	In utero	52	175	5	232
3	Acetic acid 1M	Eggs	4	In utero	69	147	3	219
3	Acetic acid 1M	Eggs	5	In utero	47	151	6	204
3	Acetic acid 1M	Eggs	6	In utero	55	143	3	201
3	Acetic acid 1M	Eggs	7	In utero	42	192	0	234
3	Acetic acid 1M	Eggs	8	In utero	29	68	0	97
3	Acetic acid 1M	Eggs	9	In utero	23	125	0	148
3	Acetic acid 1M	Eggs	10	In utero	56	186	6	248
3	Acetic acid 1M	Eggs	11	In utero	47	30	4	81
3	Acetic acid 1M	Eggs	12	In utero	34	62	13	109
3	Acetic acid 1M	Eggs	13	In utero	65	153	1	219
3	Acetic acid 1M	Eggs	14	In utero	14	94	0	108
3	Acetic acid 1M	Eggs	15	In utero	47	193	17	257
4	Acetic acid 1M	L1	1	In utero	35	117	0	152
4	Acetic acid 1M	L1	2	In utero	52	164	0	216
4	Acetic acid 1M	L1	3	In utero	24	165	13	202
4	Acetic acid 1M	L1	4	In utero	25	152	16	193
4	Acetic acid 1M	L1	5	In utero	41	150	0	191
4	Acetic acid 1M	L1	6	In utero	77	193	17	287
4	Acetic acid 1M	L1	7	In utero	63	199	6	268
4	Acetic acid 1M	L1	8	In utero	68	202	1	271
4	Acetic acid 1M	L1	9	In utero	50	193	2	245
4	Acetic acid 1M	L1	10	In utero	69	190	9	268
4	Acetic acid 1M	L1	11	In utero	49	156	5	210
4	Acetic acid 1M	L1	12	In utero	32	122	31	185
4	Acetic acid 1M	L1	13	In utero	46	172	5	223
4	Acetic acid 1M	L1	14	In utero	58	168	11	237
4	Acetic acid 1M	L1	15	In utero	37	163	0	200
