# Supplementary material for: Natural variation in the Caenorhabditis elegans egg-laying circuit modulates an intergenerational fitness trade-off
Source: eLife. 2024 Apr 2;12:RP88253. doi: 10.7554/eLife.88253 (PMC10987095; doi:10.7554/eLife.88253)
Supplement: Supplementary file 1. [file elife-88253-supp1.xlsx]

## Sheet: Strain list
Strain	Genotype	Source/Reference	Description
MCP355	mod-5(bab355[mod-5n822]) in strain N2	This study	Single-nucleotide replacement by CRISPR-Cas9
MCP374	mod-5(bab374[mod-5n822]) in strain ED3005	This study	Single-nucleotide replacement by CRISPR-Cas9
MCP378	mod-5(bab378[mod-5n822]) in strain JU2829	This study	Single-nucleotide replacement by CRISPR-Cas9
MCP376	mod-5(bab378[mod-5n822]) in strain QX1430	This study	Single-nucleotide replacement by CRISPR-Cas9
MCP369	mod-5(bab369[mod-5n822]) in strain JU830	This study	Single-nucleotide replacement by CRISPR-Cas9
MCP370	mod-5(bab370[mod-5n822]) in strain JU751	This study	Single-nucleotide replacement by CRISPR-Cas9
MCP387	mod-5(bab387[mod-5n822]) in strain CB4856	This study	Single-nucleotide replacement by CRISPR-Cas9
MCP381	mod-5(bab381[mod-5n822]) in strain JU1200	This study	Single-nucleotide replacement by CRISPR-Cas9
MCP383	mod-5(bab383[mod-5n822]) in strain JU3166	This study	Single-nucleotide replacement by CRISPR-Cas9
MCP380	mod-5(bab380[mod-5n822]) in strain QG2873	This study	Single-nucleotide replacement by CRISPR-Cas9
NIC1627	kcnl-1(cgb1005[L530V]) in strain JU751	Vigne et al. 2021 PMCID: PMC7857674	Single-nucleotide replacement by CRISPR-Cas9
NIC1642	kcnl-1(cgb1002[V530L]) in strain JU1200	Vigne et al. 2021 PMCID: PMC7857674	Single-nucleotide replacement by CRISPR-Cas9
PD4790	mls12 (myo- 2::GFP)	Caenorhabditis Genetics Center (https://cgc.umn.edu/)	GFP-reporter, expression in pharynx
QX1430	ttTi12715; qgIR1	Andersen et al. 2015 PMID: 25770127	N2-derived strain with natural npr-1 allele (qqR1)
JU1200	wild type	CaeNDR https://caendr.org/	Wild strain
JU2593	wild type	CaeNDR https://caendr.org/	Wild strain
JU2587	wild type	CaeNDR https://caendr.org/	Wild strain
JU2829	wild type	CaeNDR https://caendr.org/	Wild strain
JU2581	wild type	CaeNDR https://caendr.org/	Wild strain
JU751	wild type	CaeNDR https://caendr.org/	Wild strain
JU3128	wild type	CaeNDR https://caendr.org/	Wild strain
XZ1516	wild type	CaeNDR https://caendr.org/	Wild strain
NIC266	wild type	CaeNDR https://caendr.org/	Wild strain
ECA372	wild type	CaeNDR https://caendr.org/	Wild strain
ECA191	wild type	CaeNDR https://caendr.org/	Wild strain
JU2001	wild type	CaeNDR https://caendr.org/	Wild strain
ECA396	wild type	CaeNDR https://caendr.org/	Wild strain
ED3073	wild type	CaeNDR https://caendr.org/	Wild strain
ECA189	wild type	CaeNDR https://caendr.org/	Wild strain
ECA369	wild type	CaeNDR https://caendr.org/	Wild strain
QX1211	wild type	CaeNDR https://caendr.org/	Wild strain
ECA363	wild type	CaeNDR https://caendr.org/	Wild strain
CX11276	wild type	CaeNDR https://caendr.org/	Wild strain
KR314	wild type	CaeNDR https://caendr.org/	Wild strain
ED3011	wild type	CaeNDR https://caendr.org/	Wild strain
CX11285	wild type	CaeNDR https://caendr.org/	Wild strain
QX1212	wild type	CaeNDR https://caendr.org/	Wild strain
ED3005	wild type	CaeNDR https://caendr.org/	Wild strain
JU830	wild type	CaeNDR https://caendr.org/	Wild strain
DL226	wild type	CaeNDR https://caendr.org/	Wild strain
CB4852	wild type	CaeNDR https://caendr.org/	Wild strain
JU1568	wild type	CaeNDR https://caendr.org/	Wild strain
MY18	wild type	CaeNDR https://caendr.org/	Wild strain
CB4853	wild type	CaeNDR https://caendr.org/	Wild strain
CB4854	wild type	CaeNDR https://caendr.org/	Wild strain
AB1	wild type	CaeNDR https://caendr.org/	Wild strain
XZ1514	wild type	CaeNDR https://caendr.org/	Wild strain
CB4857	wild type	CaeNDR https://caendr.org/	Wild strain
CB4858	wild type	CaeNDR https://caendr.org/	Wild strain
QX1791	wild type	CaeNDR https://caendr.org/	Wild strain
CX11262	wild type	CaeNDR https://caendr.org/	Wild strain
CX11271	wild type	CaeNDR https://caendr.org/	Wild strain
CB4932	wild type	CaeNDR https://caendr.org/	Wild strain
CX11292	wild type	CaeNDR https://caendr.org/	Wild strain
CX11264	wild type	CaeNDR https://caendr.org/	Wild strain
CX11307	wild type	CaeNDR https://caendr.org/	Wild strain
CX11314	wild type	CaeNDR https://caendr.org/	Wild strain
CX11315	wild type	CaeNDR https://caendr.org/	Wild strain
ED3049	wild type	CaeNDR https://caendr.org/	Wild strain
ED3077	wild type	CaeNDR https://caendr.org/	Wild strain
ED3052	wild type	CaeNDR https://caendr.org/	Wild strain
ED3048	wild type	CaeNDR https://caendr.org/	Wild strain
ED3046	wild type	CaeNDR https://caendr.org/	Wild strain
ED3017	wild type	CaeNDR https://caendr.org/	Wild strain
DL238	wild type	CaeNDR https://caendr.org/	Wild strain
DL200	wild type	CaeNDR https://caendr.org/	Wild strain
ED3012	wild type	CaeNDR https://caendr.org/	Wild strain
EG4724	wild type	CaeNDR https://caendr.org/	Wild strain
ED3040	wild type	CaeNDR https://caendr.org/	Wild strain
EG4347	wild type	CaeNDR https://caendr.org/	Wild strain
EG4725	wild type	CaeNDR https://caendr.org/	Wild strain
EG4946	wild type	CaeNDR https://caendr.org/	Wild strain
JT11398	wild type	CaeNDR https://caendr.org/	Wild strain
JU1212	wild type	CaeNDR https://caendr.org/	Wild strain
JU1213	wild type	CaeNDR https://caendr.org/	Wild strain
JU1242	wild type	CaeNDR https://caendr.org/	Wild strain
JU1246	wild type	CaeNDR https://caendr.org/	Wild strain
JU1395	wild type	CaeNDR https://caendr.org/	Wild strain
JU1409	wild type	CaeNDR https://caendr.org/	Wild strain
JU1440	wild type	CaeNDR https://caendr.org/	Wild strain
JU1491	wild type	CaeNDR https://caendr.org/	Wild strain
JU1530	wild type	CaeNDR https://caendr.org/	Wild strain
JU1581	wild type	CaeNDR https://caendr.org/	Wild strain
JU1586	wild type	CaeNDR https://caendr.org/	Wild strain
JU310	wild type	CaeNDR https://caendr.org/	Wild strain
JU346	wild type	CaeNDR https://caendr.org/	Wild strain
JU311	wild type	CaeNDR https://caendr.org/	Wild strain
JU323	wild type	CaeNDR https://caendr.org/	Wild strain
JU1400	wild type	CaeNDR https://caendr.org/	Wild strain
JU792	wild type	CaeNDR https://caendr.org/	Wild strain
JU397	wild type	CaeNDR https://caendr.org/	Wild strain
JU406	wild type	CaeNDR https://caendr.org/	Wild strain
JU440	wild type	CaeNDR https://caendr.org/	Wild strain
JU393	wild type	CaeNDR https://caendr.org/	Wild strain
JU394	wild type	CaeNDR https://caendr.org/	Wild strain
MY1	wild type	CaeNDR https://caendr.org/	Wild strain
JU774	wild type	CaeNDR https://caendr.org/	Wild strain
LKC34	wild type	CaeNDR https://caendr.org/	Wild strain
JU778	wild type	CaeNDR https://caendr.org/	Wild strain
JU782	wild type	CaeNDR https://caendr.org/	Wild strain
MY10	wild type	CaeNDR https://caendr.org/	Wild strain
JU775	wild type	CaeNDR https://caendr.org/	Wild strain
PB303	wild type	CaeNDR https://caendr.org/	Wild strain
MY23	wild type	CaeNDR https://caendr.org/	Wild strain
WN2002	wild type	CaeNDR https://caendr.org/	Wild strain
PS2025	wild type	CaeNDR https://caendr.org/	Wild strain
CX11254	wild type	CaeNDR https://caendr.org/	Wild strain
RC301	wild type	CaeNDR https://caendr.org/	Wild strain
EG4349	wild type	CaeNDR https://caendr.org/	Wild strain
QX1233	wild type	CaeNDR https://caendr.org/	Wild strain
JU1088	wild type	CaeNDR https://caendr.org/	Wild strain
NIC207	wild type	CaeNDR https://caendr.org/	Wild strain
JU1172	wild type	CaeNDR https://caendr.org/	Wild strain
NIC166	wild type	CaeNDR https://caendr.org/	Wild strain
JU367	wild type	CaeNDR https://caendr.org/	Wild strain
MY16	wild type	CaeNDR https://caendr.org/	Wild strain
CB4856	wild type	CaeNDR https://caendr.org/	Wild strain
JU360	wild type	CaeNDR https://caendr.org/	Wild strain
PX179	wild type	CaeNDR https://caendr.org/	Wild strain
N2	wild type	CaeNDR https://caendr.org/	Wild strain
BRC20067	wild type	CaeNDR https://caendr.org/	Wild strain
NIC195	wild type	CaeNDR https://caendr.org/	Wild strain
NIC199	wild type	CaeNDR https://caendr.org/	Wild strain
NIC2	wild type	CaeNDR https://caendr.org/	Wild strain
JU561	wild type	CaeNDR https://caendr.org/	Wild strain
NIC1	wild type	CaeNDR https://caendr.org/	Wild strain
NIC231	wild type	CaeNDR https://caendr.org/	Wild strain
NIC236	wild type	CaeNDR https://caendr.org/	Wild strain
NIC242	wild type	CaeNDR https://caendr.org/	Wild strain
NIC251	wild type	CaeNDR https://caendr.org/	Wild strain
NIC252	wild type	CaeNDR https://caendr.org/	Wild strain
NIC255	wild type	CaeNDR https://caendr.org/	Wild strain
NIC256	wild type	CaeNDR https://caendr.org/	Wild strain
NIC260	wild type	CaeNDR https://caendr.org/	Wild strain
NIC261	wild type	CaeNDR https://caendr.org/	Wild strain
NIC262	wild type	CaeNDR https://caendr.org/	Wild strain
NIC265	wild type	CaeNDR https://caendr.org/	Wild strain
NIC267	wild type	CaeNDR https://caendr.org/	Wild strain
NIC268	wild type	CaeNDR https://caendr.org/	Wild strain
NIC269	wild type	CaeNDR https://caendr.org/	Wild strain
NIC271	wild type	CaeNDR https://caendr.org/	Wild strain
NIC274	wild type	CaeNDR https://caendr.org/	Wild strain
NIC275	wild type	CaeNDR https://caendr.org/	Wild strain
NIC276	wild type	CaeNDR https://caendr.org/	Wild strain
NIC277	wild type	CaeNDR https://caendr.org/	Wild strain
NIC3	wild type	CaeNDR https://caendr.org/	Wild strain
GXW1	wild type	CaeNDR https://caendr.org/	Wild strain
JU2007	wild type	CaeNDR https://caendr.org/	Wild strain
JU2316	wild type	CaeNDR https://caendr.org/	Wild strain
NIC259	wild type	CaeNDR https://caendr.org/	Wild strain
NIC272	wild type	CaeNDR https://caendr.org/	Wild strain
QG556	wild type	CaeNDR https://caendr.org/	Wild strain
QW947	wild type	CaeNDR https://caendr.org/	Wild strain
JU2464	wild type	CaeNDR https://caendr.org/	Wild strain
QX1794	wild type	CaeNDR https://caendr.org/	Wild strain
JU2522	wild type	CaeNDR https://caendr.org/	Wild strain
WN2001	wild type	CaeNDR https://caendr.org/	Wild strain
QX1792	wild type	CaeNDR https://caendr.org/	Wild strain
JU2513	wild type	CaeNDR https://caendr.org/	Wild strain
QG536	wild type	CaeNDR https://caendr.org/	Wild strain
QX1793	wild type	CaeNDR https://caendr.org/	Wild strain
PB306	wild type	CaeNDR https://caendr.org/	Wild strain
JU1666	wild type	CaeNDR https://caendr.org/	Wild strain
JU3137	wild type	CaeNDR https://caendr.org/	Wild strain
WN2033	wild type	CaeNDR https://caendr.org/	Wild strain
MY518	wild type	CaeNDR https://caendr.org/	Wild strain
MY2741	wild type	CaeNDR https://caendr.org/	Wild strain
MY795	wild type	CaeNDR https://caendr.org/	Wild strain
JU2131	wild type	CaeNDR https://caendr.org/	Wild strain
NIC1698	wild type	CaeNDR https://caendr.org/	Wild strain
QG2075	wild type	CaeNDR https://caendr.org/	Wild strain
ECA36	wild type	CaeNDR https://caendr.org/	Wild strain
NIC258	wild type	CaeNDR https://caendr.org/	Wild strain
QG557	wild type	CaeNDR https://caendr.org/	Wild strain
JU2466	wild type	CaeNDR https://caendr.org/	Wild strain
JU2519	wild type	CaeNDR https://caendr.org/	Wild strain
JU2526	wild type	CaeNDR https://caendr.org/	Wild strain
JU2811	wild type	CaeNDR https://caendr.org/	Wild strain
JU2879	wild type	CaeNDR https://caendr.org/	Wild strain
CB4851	wild type	CaeNDR https://caendr.org/	Wild strain
ECA594	wild type	CaeNDR https://caendr.org/	Wild strain
JU3169	wild type	CaeNDR https://caendr.org/	Wild strain
ECA744	wild type	CaeNDR https://caendr.org/	Wild strain
ECA640	wild type	CaeNDR https://caendr.org/	Wild strain
JU3167	wild type	CaeNDR https://caendr.org/	Wild strain
ECA592	wild type	CaeNDR https://caendr.org/	Wild strain
ECA593	wild type	CaeNDR https://caendr.org/	Wild strain
ECA741	wild type	CaeNDR https://caendr.org/	Wild strain
ECA740	wild type	CaeNDR https://caendr.org/	Wild strain
ECA738	wild type	CaeNDR https://caendr.org/	Wild strain
ECA724	wild type	CaeNDR https://caendr.org/	Wild strain
ECA706	wild type	CaeNDR https://caendr.org/	Wild strain
ECA722	wild type	CaeNDR https://caendr.org/	Wild strain
ECA723	wild type	CaeNDR https://caendr.org/	Wild strain
ECA347	wild type	CaeNDR https://caendr.org/	Wild strain
JU3166	wild type	CaeNDR https://caendr.org/	Wild strain
ECA745	wild type	CaeNDR https://caendr.org/	Wild strain
ECA743	wild type	CaeNDR https://caendr.org/	Wild strain
JU3226	wild type	CaeNDR https://caendr.org/	Wild strain
ECA928	wild type	CaeNDR https://caendr.org/	Wild strain
ECA930	wild type	CaeNDR https://caendr.org/	Wild strain
QG2825	wild type	CaeNDR https://caendr.org/	Wild strain
QG2828	wild type	CaeNDR https://caendr.org/	Wild strain
QG2811	wild type	CaeNDR https://caendr.org/	Wild strain
JU3282	wild type	CaeNDR https://caendr.org/	Wild strain
QG2841	wild type	CaeNDR https://caendr.org/	Wild strain
XZ1734	wild type	CaeNDR https://caendr.org/	Wild strain
ECA746	wild type	CaeNDR https://caendr.org/	Wild strain
ECA923	wild type	CaeNDR https://caendr.org/	Wild strain
QG2832	wild type	CaeNDR https://caendr.org/	Wild strain
QG2837	wild type	CaeNDR https://caendr.org/	Wild strain
QG2846	wild type	CaeNDR https://caendr.org/	Wild strain
ECA742	wild type	CaeNDR https://caendr.org/	Wild strain
QG2836	wild type	CaeNDR https://caendr.org/	Wild strain
QG2873	wild type	CaeNDR https://caendr.org/	Wild strain
XZ1756	wild type	CaeNDR https://caendr.org/	Wild strain
XZ1735	wild type	CaeNDR https://caendr.org/	Wild strain
XZ2019	wild type	CaeNDR https://caendr.org/	Wild strain
QG2823	wild type	CaeNDR https://caendr.org/	Wild strain
QG2843	wild type	CaeNDR https://caendr.org/	Wild strain
QG2857	wild type	CaeNDR https://caendr.org/	Wild strain
WN2064	wild type	CaeNDR https://caendr.org/	Wild strain
QG2855	wild type	CaeNDR https://caendr.org/	Wild strain
JU1896	wild type	CaeNDR https://caendr.org/	Wild strain
JU847	wild type	CaeNDR https://caendr.org/	Wild strain
JU258	wild type	CaeNDR https://caendr.org/	Wild strain
ECA701	wild type	CaeNDR https://caendr.org/	Wild strain
XZ1672	wild type	CaeNDR https://caendr.org/	Wild strain
QG2850	wild type	CaeNDR https://caendr.org/	Wild strain
QG2818	wild type	CaeNDR https://caendr.org/	Wild strain
JU3224	wild type	CaeNDR https://caendr.org/	Wild strain
QG2875	wild type	CaeNDR https://caendr.org/	Wild strain
JU3228	wild type	CaeNDR https://caendr.org/	Wild strain
QG2827	wild type	CaeNDR https://caendr.org/	Wild strain
QG2854	wild type	CaeNDR https://caendr.org/	Wild strain
ECA710	wild type	CaeNDR https://caendr.org/	Wild strain
QG2874	wild type	CaeNDR https://caendr.org/	Wild strain
QG2835	wild type	CaeNDR https://caendr.org/	Wild strain
QG2838	wild type	CaeNDR https://caendr.org/	Wild strain
QG2932	wild type	CaeNDR https://caendr.org/	Wild strain
JU2907	wild type	CaeNDR https://caendr.org/	Wild strain
MY2147	wild type	CaeNDR https://caendr.org/	Wild strain
MY2585	wild type	CaeNDR https://caendr.org/	Wild strain
JU2619	wild type	CaeNDR https://caendr.org/	Wild strain
JU2838	wild type	CaeNDR https://caendr.org/	Wild strain
JU2586	wild type	CaeNDR https://caendr.org/	Wild strain
JU2825	wild type	CaeNDR https://caendr.org/	Wild strain
JU2841	wild type	CaeNDR https://caendr.org/	Wild strain
JU2800	wild type	CaeNDR https://caendr.org/	Wild strain
JU1543	wild type	CaeNDR https://caendr.org/	Wild strain
JU2862	wild type	CaeNDR https://caendr.org/	Wild strain
JU2853	wild type	CaeNDR https://caendr.org/	Wild strain
JU3144	wild type	CaeNDR https://caendr.org/	Wild strain
JU2234	wild type	CaeNDR https://caendr.org/	Wild strain
JU3132	wild type	CaeNDR https://caendr.org/	Wild strain
JU2610	wild type	CaeNDR https://caendr.org/	Wild strain
MY2453	wild type	CaeNDR https://caendr.org/	Wild strain
NIC1107	wild type	CaeNDR https://caendr.org/	Wild strain
MY2573	wild type	CaeNDR https://caendr.org/	Wild strain
MY679	wild type	CaeNDR https://caendr.org/	Wild strain
NIC513	wild type	CaeNDR https://caendr.org/	Wild strain
XZ1513	wild type	CaeNDR https://caendr.org/	Wild strain
NIC522	wild type	CaeNDR https://caendr.org/	Wild strain
NIC523	wild type	CaeNDR https://caendr.org/	Wild strain
MY920	wild type	CaeNDR https://caendr.org/	Wild strain
NIC514	wild type	CaeNDR https://caendr.org/	Wild strain
MY2693	wild type	CaeNDR https://caendr.org/	Wild strain
MY2530	wild type	CaeNDR https://caendr.org/	Wild strain
MY2212	wild type	CaeNDR https://caendr.org/	Wild strain
MY2535	wild type	CaeNDR https://caendr.org/	Wild strain
JU3140	wild type	CaeNDR https://caendr.org/	Wild strain
JU3135	wild type	CaeNDR https://caendr.org/	Wild strain
JU1249	wild type	CaeNDR https://caendr.org/	Wild strain
JU1793	wild type	CaeNDR https://caendr.org/	Wild strain
JU2878	wild type	CaeNDR https://caendr.org/	Wild strain
JU2534	wild type	CaeNDR https://caendr.org/	Wild strain
JU2016	wild type	CaeNDR https://caendr.org/	Wild strain
JU2141	wild type	CaeNDR https://caendr.org/	Wild strain
BRC20263	wild type	CaeNDR https://caendr.org/	Wild strain
JU1792	wild type	CaeNDR https://caendr.org/	Wild strain
JU2600	wild type	CaeNDR https://caendr.org/	Wild strain
JU2565	wild type	CaeNDR https://caendr.org/	Wild strain
JU1934	wild type	CaeNDR https://caendr.org/	Wild strain
JU2906	wild type	CaeNDR https://caendr.org/	Wild strain
ECA348	wild type	CaeNDR https://caendr.org/	Wild strain
JU1808	wild type	CaeNDR https://caendr.org/	Wild strain
NIC515	wild type	CaeNDR https://caendr.org/	Wild strain
JU2257	wild type	CaeNDR https://caendr.org/	Wild strain
JU2250	wild type	CaeNDR https://caendr.org/	Wild strain
JU2478	wild type	CaeNDR https://caendr.org/	Wild strain
JU2017	wild type	CaeNDR https://caendr.org/	Wild strain
NIC511	wild type	CaeNDR https://caendr.org/	Wild strain
JU2576	wild type	CaeNDR https://caendr.org/	Wild strain
MY2713	wild type	CaeNDR https://caendr.org/	Wild strain
JU2572	wild type	CaeNDR https://caendr.org/	Wild strain
JU2575	wild type	CaeNDR https://caendr.org/	Wild strain
XZ1515	wild type	CaeNDR https://caendr.org/	Wild strain
MY772	wild type	CaeNDR https://caendr.org/	Wild strain
JU2570	wild type	CaeNDR https://caendr.org/	Wild strain
NIC1049	wild type	CaeNDR https://caendr.org/	Wild strain
JU2106	wild type	CaeNDR https://caendr.org/	Wild strain
ECA349	wild type	CaeNDR https://caendr.org/	Wild strain
JU2592	wild type	CaeNDR https://caendr.org/	Wild strain
WN2063	wild type	CaeNDR https://caendr.org/	Wild strain
WN2050	wild type	CaeNDR https://caendr.org/	Wild strain
WN2066	wild type	CaeNDR https://caendr.org/	Wild strain
NIC501	wild type	CaeNDR https://caendr.org/	Wild strain
NIC1785	wild type	Braendle worm collection	Wild strain
NIC1789	wild type	Braendle worm collection	Wild strain
NIC1786	wild type	Braendle worm collection	Wild strain
NIC1780	wild type	Braendle worm collection	Wild strain
NIC1782	wild type	Braendle worm collection	Wild strain
NIC1790	wild type	Braendle worm collection	Wild strain
NIC1791	wild type	Braendle worm collection	Wild strain
NIC1783	wild type	Braendle worm collection	Wild strain
NIC1779	wild type	Braendle worm collection	Wild strain
NIC1788	wild type	Braendle worm collection	Wild strain
NIC1787	wild type	Braendle worm collection	Wild strain
NIC1792	wild type	Braendle worm collection	Wild strain
NIC1802	wild type	Braendle worm collection	Wild strain
NIC1796	wild type	Braendle worm collection	Wild strain
NIC1798	wild type	Braendle worm collection	Wild strain
NIC1794	wild type	Braendle worm collection	Wild strain
NIC1799	wild type	Braendle worm collection	Wild strain
NIC1801	wild type	Braendle worm collection	Wild strain
NIC1805	wild type	Braendle worm collection	Wild strain
NIC1812	wild type	Braendle worm collection	Wild strain
NIC1808	wild type	Braendle worm collection	Wild strain
NIC1832	wild type	Braendle worm collection	Wild strain
NIC1809	wild type	Braendle worm collection	Wild strain
